# Supplementary material for: Measurements of spectral irradiance during the solar eclipse of 21 August 2017: reassessment of the effect of solar limb darkening and of changes in total ozone
Source: Copernicus journal article supplement (doi:10.5194/acp-2018-1048), 2018-11-02
Supplement: Supplementary file 1 [file acp-2018-1048-supplement.zip]

Archive with 16 entries (16 files):
- Fig11c_Theory_Pierce.csv
- Fig11c_Theory_Waldmeier.csv
- Fig11d_Meas_to_Neckel.csv
- Fig11d_Meas_to_Pierce.csv
- Fig11d_Meas_to_Waldmeier.csv
- Fig14_Global.csv
- Fig14_Shadowbanding.csv
- Fig11a_Measurement.csv
- Fig11a_Measurement.xls
- Fig11a_Model.csv
- Fig11b_Connecting_lines.csv
- Fig11b_Measurement_to_Model.csv
- Fig11c_Measurement_model_corrected.csv
- Fig11c_Theory_Neckel.csv
- Readme.pdf
- Calibration_of_GUVis-3511.pdf
