# Supplementary material for: Measurements of spectral irradiance during the solar eclipse of 21 August 2017: reassessment of the effect of solar limb darkening and of changes in total ozone
Source: Copernicus journal article supplement (doi:10.5194/acp-2018-1048), 2018-11-02
Supplement: Supplementary file 1 [file acp-2018-1048-supplement.zip › Fig11a_Measurement.csv]

Time (UT)	306 (1)	306 (2)	315	320	340 (1)	340 (2)	380	395	412	443	490	532	555 (1)	555 (2)	665	875	940	1020
14:35:14.593	0.046105194	0.048425711	1.026389424	2.308882752	7.206797295	7.218366629	9.96121849	12.38633859	18.74757518	21.6377571	25.18624641	23.87238347	23.89478162	23.91994639	23.20109992	16.95681863	3.968692347	13.05052231
14:35:15.580	0.04400805	0.046026172	1.026884085	2.309014203	7.209413566	7.223195833	9.967411058	12.39202011	18.75333097	21.64627525	25.20449522	23.87770404	23.91351678	23.93066599	23.21308233	16.97151715	3.972254526	13.05945359
14:35:16.552	0.044125346	0.045961101	1.027474799	2.310467624	7.212466409	7.226094934	9.971618015	12.3975313	18.76175738	21.65644524	25.21977779	23.89371984	23.93000838	23.94636187	23.2312397	16.98650066	3.977275001	13.0730056
14:35:17.530	0.044031951	0.046290055	1.02818194	2.310984866	7.214366608	7.227508578	9.974443393	12.40066688	18.7657354	21.66145332	25.22472313	23.89984994	23.93385637	23.95039174	23.23387287	16.9871526	3.978433355	13.07583214
14:35:18.510	0.043880458	0.046262476	1.028620916	2.311758696	7.21619898	7.22978269	9.977432887	12.4048258	18.77211538	21.66951038	25.2366831	23.91153847	23.94738844	23.96398456	23.24886981	17.0040528	3.982899555	13.08965126
14:35:19.489	0.04380209	0.046589872	1.02908013	2.312808807	7.217966267	7.231457169	9.980338022	12.40706293	18.775537	21.67299141	25.23949564	23.91416654	23.95083667	23.96613765	23.24906518	17.0025216	3.983563218	13.09103995
14:35:20.460	0.04363925	0.046683279	1.029430505	2.313839073	7.219934081	7.234617093	9.983806742	12.41103162	18.78232279	21.68091535	25.25244137	23.92598719	23.9635959	23.98105251	23.26675301	17.0211476	3.988488212	13.10858571
14:35:21.440	0.043924824	0.04728832	1.030486846	2.314577852	7.221654201	7.236148338	9.987024649	12.41479395	18.78735635	21.68650937	25.25828014	23.93302838	23.97026079	23.98759597	23.27440775	17.02837236	3.991023834	13.11581896
14:35:22.415	0.044206723	0.047408055	1.030584245	2.315452516	7.224503529	7.237092662	9.989478194	12.41783305	18.7929836	21.69390214	25.26792149	23.94358958	23.980853	23.99908831	23.28848135	17.04285496	3.995176964	13.1285275
14:35:23.398	0.044151392	0.04630495	1.031127004	2.316298809	7.226076094	7.239425858	9.992845698	12.42274617	18.80012618	21.70286698	25.28152114	23.96061148	23.99626658	24.01647931	23.31035745	17.06275042	4.00110904	13.14896912
14:35:24.363	0.043862013	0.047299685	1.031517843	2.317129485	7.227582348	7.241151637	9.994960258	12.42565721	18.80354088	21.70673598	25.28490211	23.96317291	24.00305263	24.01870331	23.31309177	17.06426915	4.002022553	13.15061297
14:35:25.344	0.044173955	0.046763566	1.032227594	2.318157775	7.23046773	7.24364772	9.998193736	12.4286904	18.80842916	21.71194505	25.29091181	23.96848214	24.00546456	24.02542559	23.31882596	17.0708016	4.004381758	13.15772671
14:35:26.325	0.044183399	0.046895739	1.032671683	2.319181692	7.23189832	7.245355186	10.00100592	12.43232216	18.81419298	21.71930047	25.30209697	23.98225272	24.02231555	24.03792446	23.33454623	17.08609612	4.009110733	13.17339825
14:35:27.295	0.044141428	0.047374534	1.033077752	2.319992745	7.234238916	7.247544213	10.00417787	12.43546695	18.81931547	21.72559558	25.30816226	23.98776633	24.03069581	24.04599706	23.34484479	17.09623867	4.012290354	13.18359223
14:35:28.276	0.04440996	0.046678424	1.033440884	2.320431189	7.236633574	7.250431513	10.00743156	12.43972966	18.82501801	21.73294085	25.32029648	23.99909362	24.04034544	24.05807219	23.35959613	17.10748278	4.016450338	13.19724811
14:35:29.245	0.044291864	0.048055052	1.033836836	2.32169398	7.23810776	7.252372873	10.00959209	12.44259553	18.82976099	21.738711	25.32467432	24.00697224	24.0541463	24.06724051	23.37029554	17.11870061	4.019832199	13.207228
14:35:30.219	0.044532349	0.04760484	1.034339096	2.322351624	7.24065577	7.253089221	10.0127454	12.44562383	18.83473188	21.74456648	25.33376097	24.01709033	24.06252807	24.07540867	23.38157687	17.12765261	4.02318225	13.21745477
14:35:31.201	0.044507401	0.04678684	1.035069139	2.32316729	7.242003799	7.255852888	10.01519146	12.44924671	18.84028109	21.75111536	25.3443985	24.02464762	24.07285301	24.08425465	23.39337382	17.13841059	4.026941044	13.2285663
14:35:32.177	0.044507161	0.047483515	1.035419608	2.324213132	7.244105505	7.257586284	10.01808759	12.45284241	18.84445586	21.75634592	25.34904924	24.03273171	24.08112445	24.0909645	23.40066066	17.14690352	4.029883283	13.23716685
14:35:33.143	0.044610757	0.047082831	1.035742183	2.324934276	7.245901941	7.259892597	10.02017846	12.45573497	18.84915949	21.76141866	25.35534483	24.03838854	24.08790839	24.09822462	23.40861363	17.15610017	4.032689577	13.24632654
14:35:34.126	0.044416873	0.046744088	1.036626605	2.325929814	7.247652317	7.260824812	10.02336388	12.45914908	18.85330796	21.76613177	25.36014157	24.04340304	24.09066019	24.10461761	23.41291	17.16008743	4.034730733	13.25098501
14:35:35.103	0.04479824	0.047572166	1.036681046	2.326646763	7.249556073	7.262766971	10.0253531	12.46151303	18.85731366	21.76997155	25.3673121	24.04649438	24.09563418	24.10817318	23.41679047	17.16194098	4.036293047	13.25612382
14:35:36.093	0.044350954	0.046679232	1.03727707	2.327655592	7.251641198	7.265251158	10.028446	12.46469987	18.8618852	21.77495501	25.37195702	24.0532593	24.1014723	24.11435039	23.42263317	17.16899722	4.038864562	13.26312714
14:35:37.055	0.044363739	0.048122647	1.038080408	2.328337241	7.253892915	7.267400897	10.03093313	12.46859104	18.86746311	21.78174993	25.38281147	24.0610266	24.1120923	24.12625816	23.43666372	17.18519478	4.043267077	13.27809554
14:35:38.047	0.044724398	0.04753581	1.038496803	2.329113665	7.255712104	7.268692408	10.03391758	12.47147453	18.87178073	21.78758144	25.39015032	24.07018267	24.12219246	24.13385589	23.44589508	17.19542568	4.046469967	13.28912979
14:35:39.012	0.044549552	0.047159089	1.038751081	2.329975207	7.257553044	7.271103192	10.03604353	12.47448099	18.87698139	21.79364953	25.39523081	24.07537624	24.1261814	24.14323496	23.45933868	17.20852147	4.050438371	13.30330705
14:35:39.993	0.044608403	0.047398378	1.039466003	2.33073613	7.259469107	7.271768157	10.03893168	12.47706008	18.87951853	21.79637602	25.39637255	24.07745156	24.12894945	24.14462723	23.45862817	17.2088346	4.051455219	13.30467432
14:35:40.963	0.044780099	0.047598637	1.039624166	2.331689881	7.261473138	7.274524883	10.04109358	12.48067902	18.88486221	21.80211873	25.40273468	24.08643586	24.13704706	24.15315303	23.46924756	17.21868811	4.054750944	13.31465128
14:35:41.951	0.044729777	0.047567014	1.039946928	2.332560588	7.263153183	7.276357294	10.04443474	12.48325569	18.88921728	21.80655469	25.40773147	24.08971081	24.14440909	24.15746948	23.47506714	17.22587464	4.057379983	13.32330202
14:35:42.914	0.044365977	0.04824747	1.040550412	2.333733562	7.264804841	7.277568607	10.04609941	12.48560084	18.89240301	21.8097898	25.40822662	24.09018425	24.14294804	24.15945927	23.4726688	17.22527935	4.058409506	13.32357893
14:35:43.905	0.044878859	0.048010739	1.040842838	2.334558286	7.266340249	7.279362189	10.04764106	12.48904471	18.89678362	21.81467498	25.41527029	24.09968055	24.15200327	24.16770716	23.48348098	17.23695161	4.062189169	13.33683196
14:35:44.879	0.044590509	0.047556404	1.041739944	2.335231429	7.268871157	7.281917299	10.05098954	12.4916543	18.90104586	21.82005789	25.42182132	24.10446177	24.15792442	24.1742494	23.49239054	17.24741393	4.065591346	13.34802556
14:35:45.844	0.044767877	0.04809007	1.042042333	2.336046995	7.271102748	7.28414584	10.05394444	12.49440814	18.9053805	21.82500968	25.42577987	24.11287808	24.16329599	24.18115308	23.50158196	17.25709477	4.068731987	13.35875337
14:35:46.835	0.044969273	0.047967346	1.042613131	2.337156859	7.272762482	7.28569181	10.05640394	12.49746688	18.90935889	21.82957628	25.43069903	24.11751348	24.1694277	24.18668146	23.50724465	17.26480452	4.071475852	13.36702571
14:35:47.805	0.044902598	0.048283293	1.043047149	2.337847515	7.274204825	7.287347098	10.05941468	12.49958334	18.91265842	21.83239729	25.43458132	24.11869258	24.17396582	24.19193942	23.51470433	17.2726175	4.074455553	13.37702764
14:35:48.782	0.044906696	0.048073432	1.043223102	2.338654528	7.276351627	7.288129337	10.06086454	12.50270532	18.91626462	21.83600243	25.43903313	24.12429325	24.1778204	24.19475237	23.5174341	17.27856704	4.076838493	13.38452008
14:35:49.762	0.044738533	0.047465585	1.043854579	2.339492304	7.277652785	7.291037148	10.06314347	12.50499624	18.92038443	21.84009078	25.44363662	24.12757735	24.18215322	24.20024299	23.52519359	17.28923021	4.080226843	13.39453054
14:35:50.733	0.04488685	0.048465818	1.044210171	2.340301438	7.279867256	7.29309682	10.06503368	12.50723689	18.92378597	21.84405631	25.44588511	24.13187169	24.18627467	24.20411569	23.52949006	17.29719483	4.082941912	13.40346374
14:35:51.714	0.045056528	0.047962879	1.044823955	2.341248911	7.281473195	7.294590065	10.06893508	12.51067023	18.92770531	21.84819208	25.45236078	24.13673782	24.19539361	24.21018814	23.53740651	17.30810761	4.086464193	13.41574221
14:35:52.688	0.044803242	0.04734957	1.045361782	2.34193968	7.283619933	7.296643512	10.06980423	12.51283773	18.93026411	21.85029851	25.45126764	24.13832514	24.1943108	24.21032634	23.5375927	17.30930136	4.088025579	13.41917095
14:35:53.666	0.044982934	0.048333468	1.045902173	2.342483572	7.284858954	7.298019247	10.07201365	12.51555818	18.93477127	21.85486624	25.45714261	24.14529394	24.20213623	24.21701496	23.54711111	17.32212524	4.091879619	13.43229182
14:35:54.644	0.044989702	0.048072074	1.04632869	2.343461737	7.28702676	7.299466725	10.07437695	12.51746674	18.93702273	21.85643994	25.45888775	24.14341135	24.19992778	24.2159993	23.54583434	17.3214774	4.093360623	13.43492012
14:35:55.617	0.044892985	0.048561666	1.04694498	2.344547307	7.288386749	7.30183316	10.07700222	12.51984403	18.94015516	21.85906037	25.46091611	24.1456222	24.20349557	24.219157	23.54931014	17.32897573	4.096314134	13.44351609
14:35:56.588	0.045261287	0.048209196	1.04758151	2.345437657	7.290625115	7.304316851	10.07985042	12.52258789	18.94403862	21.86389647	25.46606443	24.152426	24.20899943	24.22581845	23.5574577	17.33927804	4.100045636	13.45542177
14:35:57.564	0.045117833	0.047881345	1.047785332	2.346093414	7.291867065	7.305216611	10.08165299	12.52432862	18.94753765	21.86584602	25.46795955	24.15439442	24.20945702	24.22695994	23.55884452	17.34309467	4.102020548	13.46069494
14:35:58.543	0.045157982	0.048380954	1.048189101	2.346784319	7.293792544	7.307557533	10.08316356	12.52679797	18.94988343	21.86744434	25.46766502	24.15259257	24.21017341	24.22558539	23.55874223	17.34433658	4.103742971	13.46495464
14:35:59.518	0.045160743	0.048213487	1.048896537	2.347821718	7.295889334	7.307570539	10.08560111	12.52904277	18.95204087	21.86974762	25.4673966	24.15355437	24.2092716	24.22542244	23.55794678	17.34751521	4.105470822	13.47001421
14:36:00.504	0.045257305	0.048389323	1.049178889	2.349166371	7.297629041	7.310277172	10.08763424	12.53166364	18.95568602	21.87286223	25.472142	24.15585493	24.21410459	24.22985232	23.56426118	17.35527909	4.108820319	13.47983076
14:37:15.753	0.047044404	0.052676256	1.087266999	2.415536564	7.445447849	7.457591207	10.28628012	12.76370881	19.29256143	22.24710912	25.90457397	24.57505336	24.65276223	24.65905041	23.95146134	17.64199434	4.25106987	13.74544731
14:37:16.737	0.048046838	0.05148256	1.087226077	2.416125689	7.44691795	7.458898362	10.28848811	12.76656872	19.29734683	22.25125372	25.90670815	24.57985832	24.65139561	24.66561683	23.95860777	17.65240291	4.254061262	13.75123037
14:37:17.713	0.047929474	0.051395681	1.088043122	2.417342151	7.449719296	7.461516203	10.29282499	12.77147653	19.30418779	22.25987031	25.91740332	24.59198169	24.66385181	24.67785039	23.97598769	17.66873711	4.258820854	13.7634707
14:37:18.694	0.047878552	0.051544959	1.08855646	2.41830636	7.451420148	7.463592807	10.29421422	12.77422139	19.30785645	22.26374055	25.92355895	24.59644626	24.67022678	24.68093849	23.97768603	17.66855045	4.260320075	13.76564041
14:37:19.656	0.047994228	0.051409695	1.089069807	2.419209169	7.453754128	7.465428212	10.29704767	12.77642502	19.31219283	22.26764609	25.92656568	24.600294	24.67365436	24.68375843	23.97934302	17.67124288	4.261196256	13.76517657
14:37:20.643	0.0479807	0.051292708	1.089747648	2.420094406	7.455271546	7.467243963	10.29925065	12.78016657	19.31674537	22.27374603	25.93039122	24.6076954	24.68211723	24.69375713	23.98874795	17.6788626	4.26452528	13.77384781
14:37:21.618	0.048558796	0.052274766	1.090043334	2.421128809	7.457765227	7.469346666	10.30295731	12.78243934	19.32011174	22.27721626	25.93750309	24.6104684	24.68763651	24.69703887	23.98949636	17.67923317	4.265504327	13.77439395
14:37:22.592	0.048576652	0.051662552	1.090420007	2.421906577	7.459214644	7.471331998	10.3047535	12.78508613	19.32386593	22.27987457	25.93633421	24.60968922	24.68707087	24.69681954	23.98667635	17.67430167	4.265132345	13.76900969
14:37:23.577	0.048250616	0.052084972	1.091199082	2.422658014	7.460859269	7.472626098	10.30660417	12.7880492	19.32706126	22.28293254	25.94088982	24.61625852	24.68922947	24.69751577	23.98404312	17.67128325	4.265154122	13.76509093
14:37:24.560	0.048220061	0.052188107	1.091659269	2.423788919	7.462974262	7.475035238	10.30885183	12.79008996	19.33116406	22.28660815	25.94504094	24.6132269	24.69078779	24.6993568	23.98455101	17.6660997	4.265228117	13.76164015
14:37:25.524	0.04804827	0.050932324	1.09210681	2.42435393	7.465101147	7.476127268	10.31211694	12.79310584	19.33574844	22.29256053	25.94695233	24.61877196	24.69480484	24.70419289	23.98675429	17.66788838	4.266515948	13.76319195
14:37:26.511	0.048228059	0.051987841	1.092951684	2.425368577	7.467213166	7.478269043	10.31491535	12.79617378	19.33954083	22.29591568	25.95276151	24.62053183	24.70175244	24.70772126	23.98766525	17.66652445	4.267073143	13.76072207
14:37:27.475	0.048269284	0.052711459	1.092963918	2.426330602	7.469073804	7.481212939	10.31760979	12.79989705	19.34566854	22.30256561	25.9557079	24.63063988	24.70972836	24.71702137	23.99429336	17.67248918	4.269397407	13.76714021
14:37:28.460	0.04857595	0.052018849	1.093459534	2.427224609	7.471301198	7.483367758	10.32119225	12.80431889	19.3518109	22.31161594	25.9677144	24.64159319	24.72255717	24.73122308	24.01107251	17.68347773	4.27348269	13.77698233
14:37:29.438	0.048405497	0.051761682	1.093988055	2.427954114	7.473064166	7.485496517	10.32368309	12.80848699	19.35768206	22.3189169	25.97916452	24.65100604	24.73170507	24.74155107	24.02212031	17.68961553	4.276028876	13.78301245
14:37:30.407	0.048630694	0.052594176	1.094686146	2.428863489	7.475120029	7.48796438	10.32617897	12.81054994	19.36242902	22.32394256	25.98266061	24.65652188	24.73766872	24.74641962	24.02453539	17.68934225	4.276420425	13.78195231
14:37:31.384	0.048794794	0.052282791	1.094819854	2.429849627	7.477128532	7.490177907	10.32976646	12.81551852	19.37034763	22.33236423	25.99865558	24.67323994	24.75298993	24.7625598	24.04222007	17.70572239	4.281015562	13.79550283
14:37:32.365	0.048681434	0.053397971	1.095588802	2.430546225	7.479193228	7.492476186	10.33227213	12.81754571	19.37331806	22.33507915	25.99953548	24.67760859	24.74981098	24.76176073	24.03663797	17.69568193	4.279680051	13.78717276
14:37:33.339	0.048496955	0.0521261	1.096210964	2.431525784	7.481059741	7.493848557	10.33469848	12.82095906	19.37773903	22.34082493	26.00600301	24.67931992	24.75473921	24.76716048	24.04112067	17.69810392	4.28101424	13.78702386
14:37:34.319	0.048524495	0.051615078	1.096698988	2.432485596	7.482725073	7.494953559	10.33812712	12.82488168	19.38349368	22.34807988	26.01595942	24.68668777	24.76195889	24.77673961	24.04990682	17.70619551	4.2836249	13.79388932
14:37:35.293	0.048151366	0.052024225	1.097065534	2.433625275	7.484937699	7.497167089	10.340613	12.82803946	19.38717008	22.35212167	26.02185618	24.69393367	24.76876188	24.78126678	24.05205806	17.70491636	4.284117734	13.79275001
14:37:36.261	0.048761878	0.052258792	1.09769529	2.434267046	7.487061594	7.499178499	10.34355546	12.83148841	19.39357662	22.35928573	26.02900116	24.70159935	24.77844887	24.79297802	24.06420178	17.71769308	4.287609499	13.80152353
14:37:37.240	0.048882909	0.052325988	1.098276954	2.435564647	7.489297866	7.502317937	10.34824946	12.83667012	19.401495	22.37023438	26.04542622	24.72168934	24.80083472	24.8131726	24.08773537	17.74019267	4.29362159	13.81916967
14:37:38.224	0.04851412	0.053128669	1.098825715	2.436030927	7.491442414	7.503566372	10.35032336	12.83902553	19.40446521	22.37253733	26.04594043	24.72150537	24.79956114	24.81054852	24.08158124	17.72840373	4.291793597	13.80865349
14:37:39.199	0.04872597	0.053528567	1.099625033	2.437102606	7.493320748	7.505825535	10.3517473	12.84242357	19.40955298	22.37880893	26.054192	24.72973359	24.80602915	24.81790739	24.08741845	17.73130152	4.293242206	13.80987368
14:37:40.168	0.049057689	0.053269589	1.099619545	2.438226932	7.495799621	7.507302243	10.355573	12.84693864	19.41667288	22.38775676	26.06988841	24.74261479	24.82184125	24.83388886	24.10581637	17.74726843	4.297748008	13.82347256
14:37:41.154	0.049019121	0.052925936	1.1000038	2.439002483	7.497828787	7.50963309	10.35875839	12.85041769	19.42136465	22.39295275	26.07328816	24.74549634	24.82342376	24.8354447	24.10142169	17.73797908	4.296416306	13.81442887
14:37:42.123	0.049257352	0.052941574	1.100886636	2.439874562	7.499952668	7.512061804	10.36203327	12.85348411	19.4263828	22.39941899	26.07968272	24.75168127	24.82867063	24.84183012	24.10576193	17.7398597	4.297479387	13.81459466
14:37:43.105	0.049106927	0.052997881	1.101321508	2.440827785	7.501975926	7.514431784	10.36473736	12.85772815	19.43308331	22.40779423	26.09573489	24.7619295	24.83739801	24.85386592	24.12056304	17.74938206	4.300112934	13.82154873
14:37:44.077	0.049184554	0.052406617	1.101726014	2.441800758	7.504936975	7.516580097	10.36801716	12.8618302	19.43959807	22.41551815	26.10439773	24.77144772	24.8462631	24.86451012	24.12958744	17.75396308	4.302010216	13.82573258
14:37:45.056	0.049363689	0.052426287	1.102064715	2.442832946	7.505697073	7.518167611	10.37161446	12.8652078	19.4437937	22.41992535	26.10659749	24.78095345	24.85028037	24.86688276	24.12928589	17.74718694	4.301158198	13.81852864
14:37:46.024	0.048784864	0.053540689	1.102767861	2.443812501	7.508658131	7.520244208	10.374145	12.87016282	19.45151064	22.43026815	26.12399157	24.78936637	24.864363	24.88210426	24.14190263	17.75842516	4.304304292	13.82663432
14:37:47.012	0.049380044	0.053280849	1.103324209	2.444388444	7.511071849	7.523807429	10.37788609	12.87420701	19.45844347	22.43844851	26.13220042	24.8013554	24.87532887	24.8942061	24.15234807	17.76257699	4.306022253	13.8287326
14:37:47.981	0.049585892	0.052816207	1.103981798	2.445291227	7.513172054	7.525551467	10.3817167	12.879316	19.46604398	22.44842523	26.1451225	24.81694947	24.89164592	24.91015197	24.17245554	17.77525819	4.309822643	13.83917579
14:37:48.967	0.049416433	0.053178207	1.104348333	2.446450625	7.515689313	7.527184593	10.38434628	12.88246328	19.4707666	22.45402122	26.15149376	24.8163122	24.89769784	24.91211492	24.16858366	17.76585572	4.308477906	13.82971019
14:37:49.936	0.049143794	0.052940576	1.104631359	2.447583717	7.517535107	7.529593728	10.38837039	12.88649424	19.47825847	22.46303728	26.16417012	24.83263192	24.90910576	24.9245826	24.1815556	17.77012325	4.310485602	13.8327989
14:37:50.911	0.049466512	0.052160453	1.105544558	2.448218893	7.520484298	7.532068046	10.39253337	12.89366599	19.48938727	22.47869692	26.18509158	24.8619116	24.93670036	24.9564767	24.21928251	17.80496511	4.319825105	13.86218617
14:37:51.891	0.049720113	0.053477459	1.106212263	2.449235721	7.522593335	7.53583994	10.39611076	12.89776442	19.49507945	22.48628287	26.19539083	24.87037743	24.94702455	24.96520332	24.22525787	17.8037391	4.320548455	13.86090308
14:37:52.861	0.049525941	0.053270885	1.106576274	2.450149466	7.525385752	7.538099091	10.40126619	12.90405116	19.50581285	22.50137088	26.21446177	24.89603314	24.9727239	24.99221523	24.25663516	17.83391947	4.328234147	13.88378436
14:37:53.846	0.04981494	0.052745317	1.107246507	2.451159708	7.527051036	7.539549634	10.40348886	12.9081884	19.51187702	22.50799591	26.21997016	24.90073402	24.98176201	24.99893537	24.26080081	17.83294505	4.328603598	13.8809624
14:37:54.817	0.049466166	0.053590454	1.107706688	2.452334469	7.530239847	7.542330424	10.40786522	12.91240541	19.51887233	22.51651991	26.23185597	24.91131736	24.99362789	25.01059719	24.26851438	17.8323208	4.329546408	13.87948235
14:37:55.803	0.049605573	0.053816565	1.108080813	2.453581599	7.532236445	7.544465621	10.41030124	12.91657646	19.52478907	22.52455135	26.24161639	24.92214927	25.0058873	25.02012614	24.2762703	17.83772832	4.331233397	13.88136307
14:37:56.771	0.049714259	0.053260013	1.108789015	2.454111493	7.534709372	7.546992114	10.41457341	12.92240964	19.53420404	22.53758091	26.26196726	24.94316391	25.03108447	25.04211902	24.30212885	17.85797791	4.336863972	13.89792012
14:37:57.757	0.049817271	0.052674202	1.109388383	2.455468292	7.53671484	7.548605661	10.41884538	12.92689712	19.54253255	22.54704166	26.27948899	24.95735706	25.04588112	25.05769647	24.31887294	17.87080093	4.340808899	13.90713039
14:37:58.733	0.049777366	0.053205243	1.109886522	2.45628771	7.539522016	7.55064308	10.42248231	12.93278936	19.55125693	22.56029937	26.2987966	24.97939169	25.06510233	25.08078583	24.34610677	17.89110555	4.346865284	13.92467866
14:37:59.712	0.049741802	0.054289963	1.110288489	2.457240924	7.541636958	7.553326021	10.42654097	12.93716693	19.55877912	22.56912003	26.31070685	24.99068752	25.07558166	25.0940194	24.35640796	17.89588937	4.349052996	13.92703283
14:39:15.491	0.051569268	0.054497088	1.150965437	2.531152742	7.712370016	7.723514389	10.68197093	13.24954806	20.03581201	23.14911621	27.04870847	25.72371499	25.83405167	25.86119101	25.05311023	18.30772957	4.504825702	14.22031399
14:39:16.478	0.052775856	0.056659002	1.152010262	2.53170901	7.714967889	7.727444643	10.6836739	13.25535691	20.04454063	23.15836664	27.05437775	25.74276838	25.85117676	25.87336978	25.07037064	18.31806743	4.506754947	14.22489108
14:39:17.451	0.052786788	0.056387253	1.153001945	2.533217209	7.718556764	7.731035859	10.68916767	13.26233172	20.05578944	23.17204178	27.07327679	25.76001475	25.86728582	25.89136907	25.08426134	18.3233039	4.508999038	14.22753614
14:39:18.430	0.052709548	0.057071027	1.153254649	2.533828317	7.720847008	7.73398155	10.69302405	13.26765666	20.06456465	23.18402479	27.08710925	25.77578692	25.88767312	25.9087561	25.10394622	18.33300986	4.512454196	14.23698432
14:39:19.400	0.053048115	0.056825199	1.154056527	2.535027253	7.723637194	7.735121119	10.69699459	13.272738	20.07252577	23.19319518	27.10072349	25.78710612	25.90118867	25.9203027	25.1127774	18.33492161	4.513365559	14.23749726
14:39:20.384	0.052956847	0.057556861	1.154420581	2.536033161	7.725516244	7.73785163	10.70015134	13.27700024	20.07919959	23.20223981	27.11184339	25.79754196	25.91479629	25.93231153	25.12293477	18.33910563	4.514924786	14.23975947
14:39:21.359	0.05266152	0.056485715	1.155149065	2.537243058	7.728270917	7.739845354	10.70414169	13.28210183	20.08810663	23.21346821	27.12630587	25.81321375	25.93320059	25.94877034	25.13784518	18.34468997	4.51717705	14.24296453
14:39:22.329	0.053440937	0.057551846	1.155720644	2.537724763	7.730188454	7.742256388	10.70801298	13.28666029	20.09445491	23.22094646	27.13411788	25.82384061	25.9388047	25.95647896	25.14292264	18.34208856	4.517322395	14.23989964
14:39:23.314	0.052789588	0.057816517	1.156274502	2.538996064	7.732839567	7.744973853	10.71311968	13.29299366	20.10429231	23.23489602	27.15448757	25.84269795	25.95945658	25.98127931	25.16645223	18.36326454	4.522635	14.25464778
14:39:24.293	0.05332119	0.056356323	1.156694233	2.540140155	7.735230378	7.74736531	10.71802792	13.29924416	20.11405998	23.24742784	27.17143608	25.86219759	25.98104831	26.0022313	25.18929413	18.37980753	4.527290234	14.2676295
14:39:25.264	0.052957064	0.056309788	1.157498639	2.540946475	7.737955473	7.749958908	10.7217305	13.30457251	20.12364162	23.25994821	27.19441251	25.88127933	25.99952029	26.021837	25.20914489	18.39449748	4.531141193	14.27710597
14:39:26.250	0.053133981	0.056501765	1.157968981	2.542064238	7.740364014	7.752441636	10.72481776	13.30939818	20.130579	23.26939302	27.20229601	25.89460532	26.01471838	26.03324475	25.21861119	18.39784348	4.532507215	14.2778372
14:39:27.222	0.052839992	0.057707868	1.158355814	2.542806948	7.743213345	7.754500564	10.73013785	13.31531367	20.14079644	23.28195913	27.22299117	25.91229142	26.04058938	26.05339335	25.23862721	18.41024494	4.536422754	14.2870181
14:39:28.201	0.052985515	0.057609921	1.159018494	2.543790921	7.745669228	7.757211513	10.73398428	13.32056072	20.14959483	23.29374778	27.23587466	25.92569047	26.05718649	26.07063159	25.2558381	18.42072369	4.539485226	14.29319428
14:39:29.176	0.053056895	0.057270717	1.159380018	2.544978879	7.748104413	7.76017024	10.73903642	13.32676722	20.15949431	23.30661116	27.25696724	25.94367179	26.07319951	26.09000966	25.27407107	18.43277135	4.54320555	14.30210692
14:39:30.155	0.053157665	0.056667169	1.159964245	2.546326947	7.750373933	7.762033544	10.74260002	13.33206333	20.16712959	23.31708497	27.26908141	25.95583722	26.08494342	26.10386288	25.28636465	18.43694675	4.545473896	14.3047756
14:39:31.119	0.053233387	0.057225708	1.160626929	2.547295578	7.753164114	7.765090091	10.74705183	13.33742215	20.17577302	23.32872498	27.28372293	25.97270883	26.09642296	26.11802355	25.29821084	18.44353592	4.547349738	14.30620063
14:39:32.106	0.053362543	0.057033182	1.161188376	2.548457202	7.755362618	7.767364161	10.75106691	13.34303123	20.18512957	23.34018207	27.30077623	25.98632983	26.11466221	26.13555441	25.31508563	18.44562034	4.549548027	14.30969408
14:39:33.077	0.053538456	0.057442209	1.161767543	2.549471886	7.758398303	7.770296809	10.75536983	13.34968107	20.19575792	23.35478333	27.32224003	26.00967986	26.14126789	26.16001492	25.34298489	18.46242574	4.554481722	14.32309539
14:39:34.057	0.053373382	0.057190464	1.16242769	2.550337413	7.761123363	7.774044481	10.76079902	13.35541879	20.20499046	23.36769245	27.33937985	26.02561182	26.15909541	26.17726332	25.35929077	18.47138858	4.556970241	14.32746022
14:39:35.035	0.053475486	0.057615452	1.163115675	2.551639418	7.764179734	7.775640449	10.7647397	13.36174706	20.21482007	23.38078451	27.35738172	26.04556205	26.17324428	26.19566643	25.37317432	18.47904017	4.559114922	14.33155901
14:39:36.006	0.05344634	0.05797753	1.163753047	2.552555398	7.766748033	7.778429646	10.77026319	13.3689282	20.22608421	23.39552298	27.37573544	26.07335391	26.19781429	26.22258265	25.40090581	18.50025221	4.564612706	14.34730123
14:39:36.977	0.053588855	0.057743466	1.163993096	2.553456025	7.769825124	7.781512257	10.77465045	13.3749587	20.23661947	23.4088094	27.397716	26.09490064	26.21877844	26.24277477	25.41787804	18.50997238	4.567689985	14.35405248
14:39:37.956	0.053439145	0.058236339	1.164827861	2.554573785	7.771899397	7.784164512	10.77974223	13.38185042	20.24873643	23.42568592	27.41661925	26.12191552	26.24639951	26.26945174	25.44824244	18.53340238	4.573498184	14.36903352
14:39:38.942	0.053676505	0.058460921	1.16519697	2.555542391	7.775393541	7.786347293	10.78480917	13.38826152	20.25897687	23.43963549	27.44032903	26.1408039	26.26810752	26.29054704	25.469627	18.54676373	4.577244389	14.37772852
14:39:39.908	0.053525461	0.057369643	1.16554331	2.556840016	7.777529963	7.789951533	10.78858119	13.39375056	20.26717048	23.44934326	27.45363686	26.15353309	26.28060298	26.30158177	25.47472482	18.54610355	4.577691732	14.37509795
14:39:40.894	0.053934813	0.057563929	1.16661849	2.557839327	7.780420651	7.791977825	10.79322142	13.39992983	20.27696892	23.46291553	27.46996	26.17075256	26.29748928	26.32205414	25.49463621	18.5568464	4.580961916	14.38157662
14:39:41.865	0.053627138	0.057694964	1.166845884	2.558825491	7.782489021	7.794630089	10.79810483	13.40558973	20.28643409	23.47544736	27.48573385	26.18898915	26.31575483	26.3403776	25.51189152	18.5639909	4.584045106	14.38762517
14:39:42.850	0.053800708	0.05788247	1.16776922	2.559976143	7.785447745	7.796675941	10.80313207	13.41272334	20.2971785	23.49050598	27.50768619	26.21195653	26.33765007	26.36395119	25.53740695	18.5783443	4.589179369	14.40156409
14:39:43.820	0.053902811	0.058409152	1.168138333	2.560821932	7.787924332	7.79985635	10.80783189	13.41822587	20.30687629	23.50254616	27.52607897	26.22895961	26.35658327	26.38236495	25.55478046	18.58839322	4.591992053	14.40639225
14:39:44.794	0.053573763	0.05772177	1.168897176	2.561915565	7.791016193	7.802671614	10.81169814	13.42396356	20.31661278	23.5154896	27.54115612	26.24538732	26.37811947	26.40129869	25.5767833	18.60050958	4.595654194	14.4148508
14:39:45.779	0.053963408	0.057434326	1.169213138	2.562886361	7.793477951	7.80548034	10.81646736	13.42984669	20.3264267	23.52851307	27.55895085	26.26389532	26.39892881	26.420876	25.59507797	18.6118974	4.599008175	14.42205735
14:39:46.751	0.053609648	0.058193416	1.169875814	2.56379356	7.795756337	7.807637053	10.81996644	13.43547609	20.33420922	23.53872392	27.56879658	26.27243763	26.41000849	26.43184103	25.59938874	18.60850789	4.598872835	14.41782571
14:39:47.722	0.053814611	0.058523645	1.170368931	2.564952994	7.798549432	7.810367555	10.82539065	13.44165204	20.34537244	23.55244482	27.58759338	26.29738122	26.43322984	26.45370627	25.62094004	18.62260285	4.602753319	14.42718183
14:39:48.694	0.053993858	0.059112113	1.170859517	2.566263766	7.800753863	7.813163257	10.82938093	13.44738465	20.35461267	23.56558263	27.60352568	26.31380304	26.45221408	26.47268484	25.63947476	18.63239327	4.605411796	14.43154551
14:39:49.685	0.053509853	0.058786993	1.171221028	2.567026187	7.803671148	7.815417743	10.83374326	13.45327955	20.36441873	23.5776457	27.62175056	26.3287439	26.47101311	26.49006476	25.65285076	18.64020069	4.607638223	14.43452866
14:39:50.655	0.054034417	0.058445569	1.172058322	2.567959705	7.806671307	7.818702469	10.83927166	13.46059596	20.375737	23.59409919	27.6482251	26.3524259	26.49684282	26.51728334	25.68340092	18.6618801	4.613081814	14.44978695
14:39:51.640	0.053835951	0.058459108	1.172553963	2.569211244	7.809218841	7.821178653	10.84387217	13.46760261	20.38656661	23.60903205	27.66773651	26.3747166	26.5209329	26.53894216	25.70406786	18.67504482	4.617120564	14.46049693
14:39:52.604	0.054237949	0.058261783	1.173100227	2.5701009	7.812281131	7.824111289	10.84816017	13.47339785	20.39588442	23.62056917	27.6849089	26.39256172	26.53919736	26.55781913	25.71878009	18.68122611	4.619361954	14.46466584
14:39:53.590	0.05455612	0.058604536	1.173841346	2.571117749	7.814630467	7.827363385	10.85380757	13.48059568	20.40758243	23.63664537	27.70948557	26.4161857	26.56501392	26.58364268	25.74766187	18.69908857	4.624516076	14.47969285
14:39:54.560	0.054327265	0.058265604	1.174306623	2.572117065	7.817133661	7.828848504	10.85765395	13.48506258	20.41560527	23.6473593	27.72379302	26.42742827	26.57728226	26.59777597	25.7575751	18.70059665	4.625463732	14.47888216
14:39:55.540	0.054067686	0.058315102	1.175047744	2.573432212	7.819539212	7.830874791	10.86246285	13.4913061	20.42558197	23.66048568	27.74375525	26.44779363	26.59523634	26.61875553	25.77954774	18.71554579	4.629165094	14.4875874
14:39:56.516	0.054500405	0.058525517	1.175500365	2.574317468	7.822293826	7.834009534	10.8670088	13.49660714	20.4345507	23.67122248	27.757956	26.46333223	26.61011242	26.63365737	25.79140579	18.71903999	4.630460216	14.48936813
14:39:57.486	0.054246504	0.058819522	1.176094707	2.575358456	7.824344428	7.83680523	10.87081052	13.50179486	20.44209278	23.6811132	27.76994925	26.47729212	26.62175429	26.64520961	25.80181687	18.72186127	4.631440144	14.48934233
14:39:58.475	0.054791095	0.058140137	1.176585283	2.576509092	7.827409606	7.839366164	10.87481559	13.50821258	20.45253459	23.69515426	27.78855795	26.49997191	26.64366159	26.66753432	25.82464058	18.73677754	4.635678767	14.49901106
14:39:59.446	0.054707179	0.058288073	1.177172033	2.577539111	7.830084359	7.842305302	10.87960963	13.51427677	20.46271294	23.70846357	27.80387271	26.51928852	26.66630664	26.68860487	25.84364611	18.75028004	4.639419367	14.50826476
14:40:00.419	0.05450571	0.058923044	1.177849886	2.5783476	7.83230356	7.843764331	10.88342125	13.51917172	20.47047207	23.71820567	27.81442677	26.53188612	26.67389899	26.69779076	25.84911676	18.74701004	4.639224869	14.5028547
14:41:15.878	0.05689927	0.064504504	1.221049213	2.655004234	8.022867596	8.034444141	11.20299327	13.9326984	21.13108248	24.56903463	28.93884833	27.69290303	27.87799277	27.91760625	26.98010657	19.38258105	4.846251348	14.92813504
14:41:16.857	0.057689157	0.061833317	1.2211975	2.656482405	8.024338855	8.036656607	11.20300629	13.93664808	21.13778372	24.58020709	28.96875917	27.69910162	27.89095798	27.92599955	26.98900102	19.38746923	4.848407114	14.9334446
14:41:17.836	0.057543932	0.062931725	1.222183401	2.658193053	8.027700151	8.039318926	11.20831237	13.94270722	21.14748507	24.59256837	28.985401	27.71308554	27.90723925	27.94169972	27.00425172	19.39830797	4.851978903	14.94155242
14:41:18.805	0.057476521	0.062589787	1.222693567	2.658662372	8.030091386	8.040990356	11.2096998	13.94605682	21.15228751	24.59652818	28.9903993	27.71774138	27.91133171	27.94541231	27.0052751	19.39623446	4.852369652	14.93911327
14:41:19.795	0.057525666	0.061961016	1.223102487	2.659515451	8.032349286	8.043945927	11.21422665	13.94914139	21.15695688	24.60202982	28.99157689	27.71741772	27.91624306	27.9487691	27.00463007	19.38937411	4.852544673	14.93409237
14:41:20.765	0.057817607	0.06230638	1.223508898	2.660671235	8.034418097	8.045754248	11.21692365	13.95381713	21.16383681	24.61139653	29.00474682	27.73117458	27.93076344	27.96089662	27.01661042	19.3999189	4.855834265	14.94151719
14:41:21.735	0.057524765	0.062202782	1.224039304	2.661914745	8.03682705	8.048925173	11.2217785	13.9607055	21.17408118	24.62472985	29.02386157	27.7537704	27.95640005	27.98330545	27.04270201	19.4190466	4.861813259	14.95851165
14:41:22.722	0.057938273	0.063108603	1.225098577	2.662770019	8.039155952	8.050981043	11.22532813	13.96482204	21.18127785	24.63236921	29.0313356	27.76575499	27.96967497	27.99403713	27.05154429	19.42395862	4.864127436	14.96233394
14:41:23.688	0.058104307	0.063812987	1.225510049	2.663778863	8.04127803	8.052730715	11.22909669	13.96912741	21.18777804	24.64049003	29.04049608	27.7739019	27.97547765	28.00230803	27.05780941	19.42453965	4.865040548	14.96137865
14:41:24.674	0.057921009	0.06206828	1.226005009	2.664432363	8.043586225	8.055627617	11.23208577	13.97372267	21.19530029	24.6503013	29.05407402	27.78712995	27.99050954	28.01586723	27.06928408	19.42862833	4.867846786	14.96682392
14:41:25.649	0.057657557	0.06328952	1.226522754	2.665759195	8.046018761	8.057657523	11.23559604	13.97819498	21.20237352	24.65972458	29.0639222	27.79817988	28.00003783	28.026081	27.07943464	19.43332529	4.869896385	14.96953077
14:41:26.623	0.057814574	0.062852311	1.22746816	2.666928118	8.048844686	8.059850425	11.23971648	13.98342177	21.21081891	24.67055392	29.08129919	27.81118166	28.013096	28.0431602	27.09805166	19.44708246	4.873873384	14.97856115
14:41:27.593	0.057854034	0.062574825	1.227659468	2.667814128	8.050818808	8.062043365	11.2435642	13.98768959	21.21770631	24.67773694	29.09177087	27.82165242	28.02331335	28.05242473	27.10279646	19.44716837	4.874749165	14.97869535
14:41:28.580	0.057829706	0.062462388	1.228055732	2.66870887	8.052940629	8.064522974	11.24664742	13.99149299	21.2228872	24.68390143	29.09795199	27.82671548	28.02725436	28.05701388	27.10378761	19.44293698	4.874768614	14.97529834
14:41:29.560	0.05814269	0.062109888	1.228829052	2.669597047	8.055470691	8.067550299	11.25139262	13.99612899	21.23046386	24.69354139	29.11113917	27.84025064	28.04173916	28.07134258	27.11597459	19.45511111	4.878030348	14.98336064
14:41:30.524	0.058287017	0.062477401	1.229286071	2.670450168	8.057622328	8.070408283	11.25407475	14.00095695	21.23863836	24.70379963	29.12496485	27.85475959	28.06130042	28.08559578	27.13200913	19.46623041	4.881720813	14.99137225
14:41:31.500	0.058293081	0.062871264	1.229669692	2.671393181	8.059835941	8.071284179	11.25750054	14.00534443	21.24529269	24.71134788	29.13086239	27.86498291	28.06828316	28.09446232	27.14059246	19.47017458	4.88350868	14.9925811
14:41:32.476	0.058569663	0.06273179	1.230200082	2.672406373	8.061875041	8.073470503	11.25901157	14.0071015	21.24781516	24.71371788	29.13101406	27.86171147	28.06496364	28.0892481	27.12906668	19.45364186	4.880678201	14.98103314
14:41:33.465	0.058155587	0.062262477	1.230910125	2.673450239	8.064286671	8.075897902	11.26221369	14.00984405	21.25160816	24.71695575	29.1339936	27.86420846	28.06474844	28.09060169	27.1247449	19.44915188	4.880149199	14.9761531
14:41:34.434	0.05831127	0.062594373	1.231508845	2.674441512	8.06607147	8.077497533	11.26639861	14.01520446	21.25984422	24.72864235	29.15019728	27.88165981	28.08404703	28.10723934	27.14388282	19.46321306	4.884289877	14.98567298
14:41:35.410	0.058677024	0.063004718	1.231950664	2.675524881	8.068823369	8.08039447	11.26915963	14.01864963	21.26542865	24.73477303	29.15728745	27.89030453	28.0925882	28.11612802	27.15011799	19.46642662	4.88589629	14.98800078
14:41:36.385	0.058900506	0.06264861	1.232526601	2.676250764	8.070324149	8.082424313	11.27165281	14.02183265	21.27021466	24.7394406	29.16180639	27.89182866	28.09656769	28.11979187	27.15218007	19.46497202	4.886473415	14.987084
14:41:37.366	0.058817398	0.063963425	1.233100001	2.677226653	8.073522599	8.08437585	11.27563886	14.02808546	21.28034909	24.75330954	29.18179194	27.91747336	28.12099276	28.14241983	27.18051224	19.4899432	4.893087648	15.00613725
14:41:38.332	0.058734624	0.062835797	1.23360003	2.678288108	8.075727407	8.087325033	11.28073651	14.03285385	21.28825183	24.76289287	29.19431751	27.93618458	28.13278891	28.15842389	27.19744433	19.5041533	4.89714821	15.01734891
14:41:39.325	0.058319879	0.061949693	1.234224025	2.679231069	8.077290088	8.089628479	11.28372013	14.03700338	21.29376533	24.76797064	29.19634174	27.93682869	28.13433955	28.16100853	27.19674816	19.49974379	4.896983227	15.01299873
14:41:40.288	0.05859045	0.062775196	1.234860703	2.680132427	8.079979984	8.091710587	11.28565806	14.04079755	21.29917983	24.77446778	29.20362564	27.94181226	28.14249201	28.17017098	27.20353257	19.50467756	4.898940051	15.01661686
14:41:41.277	0.058440882	0.063246485	1.23543662	2.680985474	8.082610435	8.094124896	11.29057632	14.04551557	21.30724385	24.78558116	29.22377504	27.95581144	28.15655009	28.18665506	27.21990931	19.52130536	4.903250495	15.02921787
14:41:42.248	0.05863464	0.062422345	1.235820238	2.682123671	8.08475601	8.096506801	11.29283638	14.0488441	21.3115648	24.78954009	29.22669703	27.95932647	28.15846536	28.18858886	27.21848643	19.51562223	4.902619317	15.02364485
14:41:43.224	0.058715848	0.063252316	1.236335435	2.683360547	8.08636618	8.09759779	11.29668854	14.05350016	21.31897838	24.7988139	29.23707346	27.96896805	28.17092046	28.20086886	27.22981743	19.52581395	4.905657786	15.0311455
14:41:44.199	0.058785701	0.062978774	1.237098622	2.684121509	8.088881414	8.100572909	11.30015877	14.05875841	21.3271594	24.80916221	29.25067056	27.98721864	28.18799443	28.21651885	27.2437091	19.53769831	4.909408235	15.04049202
14:41:45.174	0.058814141	0.063441653	1.237434153	2.685178545	8.091026929	8.102687454	11.30205656	14.06034441	21.3289452	24.81006882	29.24827709	27.97875583	28.17869511	28.20802495	27.22869915	19.51618145	4.904864982	15.02185711
14:41:46.145	0.058591764	0.062712695	1.238116365	2.685932934	8.093802472	8.104749882	11.30651894	14.06492791	21.33594038	24.81831409	29.25689791	27.98995936	28.19168787	28.21945756	27.23941506	19.52271333	4.907325509	15.02723361
14:41:47.124	0.058598162	0.063029921	1.238305122	2.687121546	8.096631158	8.107425042	11.31210205	14.07301738	21.34931467	24.83699483	29.28492711	28.02373085	28.2268755	28.2547033	27.28163587	19.55687713	4.917232685	15.05570672
14:41:48.098	0.058548117	0.06390865	1.239083489	2.687775042	8.097487113	8.109389634	11.31387086	14.07618827	21.35302287	24.84048471	29.28474034	28.02207035	28.22214288	28.25421575	27.2761096	19.54976342	4.916113448	15.04870658
14:41:49.083	0.058513435	0.064065805	1.239543001	2.689066714	8.100661771	8.110910778	11.31753411	14.07999454	21.36035815	24.84920899	29.29490938	28.03388329	28.23745143	28.2659948	27.28705599	19.55524365	4.918587361	15.05274883
14:41:50.062	0.058729906	0.064541821	1.239870933	2.689856169	8.102260041	8.11259497	11.3209396	14.08406328	21.36536051	24.85509887	29.30059299	28.0383713	28.24289837	28.27180449	27.29056032	19.55384796	4.919454553	15.05219297
14:41:51.032	0.058578665	0.063451855	1.240386129	2.69072021	8.105038519	8.116039494	11.32426105	14.0886196	21.37296018	24.86463562	29.3168672	28.04779557	28.2535706	28.28377911	27.30246036	19.56203253	4.921824055	15.05629618
14:41:52.018	0.058813171	0.063895256	1.241080973	2.691529385	8.107417529	8.119946707	11.32883192	14.09334757	21.37997747	24.87371403	29.33060085	28.05789057	28.26405645	28.29646199	27.31449602	19.56874234	4.924791624	15.06376303
14:41:52.983	0.058761122	0.064109574	1.2418391	2.692654418	8.109604514	8.121037772	11.33210885	14.09854006	21.38960051	24.88623432	29.35007611	28.07627524	28.28104736	28.31698606	27.33566651	19.58633163	4.92995715	15.07903833
14:41:53.968	0.058809601	0.064346467	1.242399826	2.694018454	8.111995353	8.123712819	11.33671939	14.10293649	21.39640073	24.89499265	29.36131804	28.09004976	28.29666236	28.32936338	27.34760694	19.5952545	4.932495271	15.0850367
14:41:54.939	0.058916527	0.064401999	1.243001055	2.6945272	8.114492815	8.124810329	11.33831955	14.10528701	21.39916322	24.89525919	29.3598657	28.08502765	28.29272247	28.3227699	27.3338082	19.57649756	4.92925358	15.06913263
14:41:55.914	0.059025791	0.063125857	1.243503589	2.69541754	8.116661927	8.127557187	11.34306925	14.11102351	21.40811115	24.90804155	29.37423666	28.102941	28.30850106	28.34200172	27.35544772	19.59704039	4.93508213	15.08545171
14:41:56.898	0.058924981	0.063746074	1.243907425	2.696544715	8.118754035	8.129834546	11.34536338	14.11471289	21.41450049	24.91487955	29.38292067	28.1128126	28.3181994	28.35078303	27.36233859	19.59978482	4.936737874	15.08752159
14:41:57.873	0.059658457	0.064360111	1.244270782	2.697832006	8.120367096	8.131375314	11.34808931	14.11790206	21.41871994	24.91961496	29.38559585	28.11249487	28.32047185	28.352081	27.35915834	19.59497737	4.936304305	15.08205971
14:41:58.845	0.059420715	0.063538872	1.245140235	2.69890657	8.123361408	8.133822297	11.35329538	14.12276247	21.42678425	24.92876258	29.39990065	28.12807789	28.33390491	28.36617938	27.3732835	19.60612278	4.939788068	15.09070396
14:41:59.831	0.059630509	0.064127162	1.245632633	2.699744243	8.125033491	8.135786688	11.35461721	14.12615566	21.4314293	24.93416014	29.40181203	28.13134219	28.3370972	28.37108144	27.37668856	19.60525486	4.940427527	15.08937604
14:43:15.684	0.060920644	0.066386233	1.288628098	2.777314177	8.31952406	8.328503095	11.68331165	14.55113153	22.10871622	25.79544913	30.5156911	29.24904373	29.50835692	29.53287572	28.42841915	20.19110562	5.150981817	15.48029
14:43:16.660	0.062562099	0.067161028	1.290167776	2.778806675	8.322111398	8.333506938	11.68642048	14.55869775	22.12006064	25.81032856	30.53785283	29.27368917	29.525459	29.56020463	28.45247984	20.20518393	5.156053055	15.49374524
14:43:17.637	0.062634121	0.06838919	1.290728226	2.780093028	8.325754471	8.337063624	11.69258392	14.56695032	22.13319506	25.82724194	30.56080895	29.29302444	29.54545677	29.58012041	28.46829967	20.21005202	5.158757171	15.49663675
14:43:18.620	0.062896183	0.066410868	1.291435424	2.781164449	8.328927226	8.339681529	11.69720978	14.5730533	22.14376379	25.8413321	30.58376375	29.31639138	29.56574958	29.60125452	28.49072254	20.22334635	5.163260998	15.50676782
14:43:19.590	0.062815572	0.066843011	1.291773215	2.782152576	8.331381547	8.341908518	11.702223	14.57884265	22.15169865	25.85128646	30.59534143	29.33059111	29.57985191	29.6129005	28.49920442	20.22508009	5.164455927	15.50657771
14:43:20.565	0.062791404	0.068339471	1.292503193	2.783134107	8.333723405	8.344565642	11.7073748	14.58670287	22.16393403	25.86845112	30.61939669	29.35250534	29.60430807	29.6400811	28.52553613	20.2440344	5.169931498	15.52015715
14:43:21.540	0.062419554	0.066960285	1.293177504	2.78410467	8.336763174	8.34725535	11.71266045	14.59308184	22.17492941	25.88305592	30.63846424	29.37621867	29.62491445	29.66002989	28.54358043	20.25462663	5.173229709	15.52698309
14:43:22.521	0.063227352	0.067707505	1.293940365	2.785353717	8.338960013	8.350446877	11.71711765	14.59814824	22.18201849	25.89134075	30.64498583	29.38262062	29.63130403	29.66692653	28.54369913	20.24816405	5.172474456	15.51911521
14:43:23.492	0.0625646	0.067277201	1.294414787	2.786727791	8.342298509	8.353697218	11.72253234	14.60512593	22.19557136	25.90905397	30.66891526	29.40786636	29.65956257	29.69593739	28.57692033	20.27101183	5.179095569	15.53746636
14:43:24.480	0.062885106	0.06732815	1.294717126	2.787516291	8.344672658	8.355506691	11.72642881	14.61123157	22.20380667	25.91894936	30.68362175	29.42130778	29.67344533	29.7076449	28.58600859	20.27190047	5.180413222	15.53711602
14:43:25.456	0.063056988	0.067980946	1.295525535	2.788528508	8.347499447	8.35837234	11.73126796	14.61786723	22.21494891	25.93435365	30.70323144	29.44650126	29.6967014	29.72811183	28.60772022	20.28461782	5.184798317	15.54734474
14:43:26.424	0.062785004	0.067346114	1.295924049	2.789760042	8.34978517	8.361296773	11.73509092	14.6243766	22.2256655	25.94804441	30.72045134	29.46169669	29.71491195	29.74642257	28.62271096	20.2924302	5.187287006	15.55071194
14:43:27.406	0.062752486	0.068214765	1.29647436	2.790906004	8.353277229	8.364064529	11.74168015	14.6318926	22.23801598	25.96549351	30.74001978	29.48639196	29.74063982	29.77281877	28.64820687	20.31161734	5.19291794	15.56463478
14:43:28.380	0.062990497	0.068031913	1.29721192	2.791690155	8.355376533	8.366337001	11.74642011	14.63832532	22.24812748	25.97799517	30.75519828	29.50320627	29.75841062	29.79006512	28.66125291	20.31786878	5.195668486	15.56961765
14:43:29.353	0.062916232	0.067310571	1.297483912	2.792897544	8.358788863	8.369117918	11.7526576	14.64542929	22.26042429	25.99402783	30.77905968	29.5252459	29.78502546	29.81395473	28.68374473	20.3323543	5.199913315	15.57792073
14:43:30.332	0.06369997	0.067087985	1.298520034	2.79399965	8.361520922	8.371859618	11.75614272	14.65202721	22.27051973	26.00787732	30.79333615	29.54333392	29.80539333	29.83269038	28.69998372	20.34077869	5.203009788	15.58323619
14:43:31.307	0.063213903	0.068254792	1.299002032	2.794777212	8.363836063	8.375526985	11.76108087	14.65833455	22.28077042	26.02117854	30.8141435	29.55748981	29.82303267	29.85051165	28.7179757	20.34874865	5.205768508	15.58701836
14:43:32.288	0.063574816	0.068640982	1.299516915	2.795690716	8.366236862	8.37851633	11.7661625	14.6645687	22.29109028	26.03508483	30.83019421	29.57691363	29.84144621	29.86987876	28.7352782	20.35790278	5.209221962	15.59291858
14:43:33.263	0.063442772	0.06765118	1.300388571	2.796941946	8.369450982	8.380534522	11.77090719	14.67027064	22.299667	26.04589478	30.84679553	29.58791048	29.85362659	29.88198273	28.74323217	20.35809708	5.210273145	15.59187412
14:43:34.239	0.063118021	0.067942445	1.300577056	2.798061596	8.372449199	8.383191489	11.77624186	14.67739773	22.31125799	26.0617782	30.86754243	29.60820402	29.8769627	29.90516918	28.76780315	20.372865	5.21501004	15.60442908
14:43:35.206	0.063268526	0.067103026	1.301137499	2.799060661	8.374924117	8.386396133	11.78170088	14.68466405	22.32342306	26.07765082	30.89137698	29.63213155	29.89894139	29.93040253	28.78906315	20.38549663	5.219861754	15.61610786
14:43:36.198	0.063303137	0.068048371	1.301849722	2.800105695	8.37750214	8.387827376	11.78532899	14.68935015	22.33157974	26.08668797	30.90303396	29.64467163	29.91174677	29.94167626	28.79665393	20.38871103	5.220874399	15.61543375
14:43:37.158	0.063653027	0.068800865	1.30259488	2.801194687	8.380207811	8.390921299	11.79048083	14.6959693	22.3419397	26.10029847	30.92080942	29.66165964	29.93103919	29.9603922	28.8158328	20.39955295	5.224221692	15.62326467
14:43:38.144	0.063664927	0.06847709	1.302836483	2.802450255	8.382661705	8.393630214	11.79400503	14.70194743	22.35228197	26.11379247	30.93658654	29.68310774	29.947158	29.97964294	28.83473999	20.41044839	5.228016216	15.63093293
14:43:39.123	0.063114743	0.068318619	1.303634749	2.803576461	8.384837724	8.396528263	11.7988832	14.70802576	22.36181109	26.1258129	30.95734505	29.69630225	29.96266901	29.99460235	28.84744795	20.4151089	5.229860903	15.63303843
14:43:40.094	0.063451606	0.068526024	1.304354585	2.804125956	8.387983817	8.398898446	11.80343444	14.71384593	22.37086035	26.13760539	30.97605173	29.71091907	29.97896304	30.0106708	28.8618631	20.4218189	5.232253103	15.63687597
14:43:41.074	0.063338266	0.068083216	1.304816325	2.805184175	8.390363848	8.400740496	11.80774226	14.71921061	22.37930441	26.14849434	30.98576299	29.72161183	29.99124951	30.0248386	28.87423853	20.42793298	5.234396764	15.64031976
14:43:42.053	0.063200546	0.06840485	1.305151553	2.806145906	8.39282373	8.403755844	11.81149475	14.72509096	22.38811268	26.16014889	30.99980552	29.73560216	30.0071139	30.04017	28.88819987	20.43495073	5.236656687	15.64418213
14:43:43.032	0.06368235	0.069835414	1.305610762	2.807070357	8.395437375	8.405734777	11.81650169	14.73114032	22.39805223	26.17255754	31.01415253	29.75180356	30.02249367	30.05687932	28.90140342	20.44080475	5.238787371	15.64656608
14:43:44.007	0.063588048	0.068741807	1.306181305	2.808391732	8.397459641	8.409063044	11.82129557	14.73806059	22.40943332	26.18764029	31.03422198	29.77447808	30.0458006	30.07967831	28.92447803	20.45692256	5.243389501	15.65763932
14:43:44.980	0.063734207	0.068791205	1.307017524	2.809195587	8.401380427	8.412528213	11.82614405	14.74455828	22.42086098	26.20322589	31.05465581	29.79791583	30.06937326	30.10411545	28.94707947	20.47237391	5.248129421	15.67030252
14:43:45.958	0.063278879	0.067828405	1.307390703	2.810225293	8.40344107	8.413483775	11.83057079	14.75011725	22.43087013	26.21605715	31.06826072	29.8159323	30.08602308	30.12039476	28.96293285	20.48064414	5.250748484	15.67593525
14:43:46.929	0.06359503	0.068578033	1.308052336	2.811167303	8.406143517	8.41758774	11.8353945	14.7579083	22.44393279	26.23310533	31.09825067	29.83998249	30.11192858	30.14862721	28.99000712	20.50116825	5.256982079	15.69279552
14:43:47.909	0.063927877	0.068813319	1.308691184	2.812330764	8.408804413	8.42000985	11.84072349	14.7632692	22.45212841	26.24234833	31.10932506	29.85144764	30.12205201	30.16001401	28.9966994	20.50094594	5.257874463	15.69180332
14:43:48.895	0.063568401	0.068578642	1.309246525	2.813226671	8.412186748	8.422607847	11.8444903	14.76930586	22.46050946	26.25413889	31.12390148	29.86708271	30.13784482	30.17529612	29.01105708	20.50554437	5.260057627	15.69594048
14:43:49.854	0.06401146	0.068235496	1.309769009	2.814098541	8.413706499	8.425212785	11.8498797	14.77583131	22.47168993	26.26919958	31.14635656	29.8878935	30.16055489	30.19760023	29.03538921	20.52056142	5.264927336	15.70797886
14:43:50.834	0.063820974	0.069207383	1.310423034	2.81515893	8.416352581	8.426807061	11.85434584	14.78162991	22.48095468	26.28188174	31.16289388	29.9047939	30.17862438	30.21471332	29.04972477	20.52956261	5.268040668	15.71317725
14:43:51.819	0.064521184	0.068425686	1.311011266	2.816416658	8.418912819	8.429607109	11.85844481	14.78727087	22.49097832	26.29390067	31.17758912	29.9232243	30.19423951	30.23270579	29.06573812	20.53977359	5.271368608	15.71943337
14:43:52.790	0.063634374	0.068666635	1.311376858	2.81760645	8.422250989	8.433046148	11.86417564	14.79350449	22.50092555	26.306572	31.19311451	29.9413017	30.2118525	30.24904134	29.07844367	20.54554534	5.273899359	15.72308675
14:43:53.760	0.064098134	0.069053133	1.312192826	2.81835109	8.424500945	8.43492736	11.86774471	14.79955724	22.50964852	26.31778076	31.20845448	29.95824846	30.22476836	30.2627902	29.08814381	20.55095957	5.275887776	15.72544366
14:43:54.745	0.064473056	0.069016961	1.312768404	2.819450924	8.426588017	8.437583978	11.87162046	14.80393349	22.51685148	26.32721712	31.21909647	29.96783358	30.23412863	30.27237789	29.09509228	20.55138281	5.27682654	15.72437948
14:43:55.726	0.063826372	0.069119561	1.312949275	2.820309553	8.429405548	8.440540484	11.87623017	14.81024229	22.52596086	26.33867622	31.23532811	29.98414191	30.25430544	30.29041549	29.11508141	20.5628989	5.280361068	15.73191885
14:43:56.703	0.064852193	0.068482745	1.31376017	2.821227401	8.431856452	8.44244763	11.87978891	14.81470525	22.53385398	26.34817026	31.24807046	29.99350603	30.26246452	30.30146208	29.12184334	20.56441879	5.28120152	15.7311501
14:43:57.673	0.064587903	0.069334717	1.314221905	2.822270262	8.433881635	8.444876328	11.88456268	14.82137313	22.54478502	26.36188109	31.26612481	30.01558106	30.28355489	30.32296977	29.14389488	20.57772963	5.285806478	15.74259636
14:43:58.648	0.064442505	0.070327507	1.31490376	2.823466605	8.436575034	8.447604768	11.88889492	14.82684031	22.55342978	26.37294055	31.27876125	30.02745145	30.29829602	30.33808266	29.15557908	20.58296315	5.287772471	15.74504847
14:43:59.628	0.064392954	0.069657911	1.315724767	2.823945865	8.439256516	8.449342374	11.89304344	14.83220395	22.56352303	26.38558776	31.29479371	30.04307949	30.31793032	30.35635649	29.17301102	20.59561806	5.29114524	15.75320049
14:45:15.343	0.069173325	0.072022746	1.357591543	2.898881265	8.619605211	8.627065599	12.18689346	15.20141507	23.1353259	27.08296897	32.1515371	30.90664749	31.22317473	31.25445979	29.9594397	21.02975213	5.460925347	16.05952874
14:45:16.333	0.067507562	0.071972871	1.358380445	2.89984051	8.620412824	8.631648369	12.18665378	15.20565212	23.140585	27.09185087	32.17975864	30.91509139	31.2314334	31.26417872	29.96995756	21.0448868	5.464745825	16.0693735
14:45:17.303	0.067475488	0.072860304	1.359108635	2.900839247	8.622938498	8.63316145	12.18983504	15.20808119	23.14264683	27.09181652	32.17095542	30.90665716	31.22354369	31.2553725	29.95545404	21.03061548	5.462191609	16.05842124
14:45:18.275	0.06725206	0.07272521	1.359730559	2.901767813	8.624269577	8.634628894	12.19135554	15.20975804	23.1443599	27.09350636	32.17322412	30.90926884	31.22220904	31.25569604	29.95454033	21.02912246	5.462537707	16.05739044
14:45:19.244	0.0678939	0.072953129	1.360317062	2.902823563	8.626230487	8.637517192	12.19395679	15.21281587	23.14841251	27.09688696	32.17717451	30.91112457	31.22521978	31.259474	29.95847318	21.03406106	5.464435294	16.06125892
14:45:20.235	0.067502828	0.074008428	1.36077452	2.903442925	8.627067657	8.638306692	12.19393521	15.21230337	23.14721903	27.09337701	32.16637441	30.89831579	31.21368653	31.24720779	29.94280284	21.01844337	5.460961514	16.04850474
14:45:21.203	0.0677299	0.073253207	1.361345843	2.904426313	8.629528281	8.639233193	12.19686861	15.21568911	23.15210824	27.09919032	32.17698943	30.90821296	31.22231653	31.25615483	29.95340105	21.02866412	5.464792675	16.05842642
14:45:22.189	0.068494967	0.073690355	1.362086673	2.905422835	8.631456564	8.642968673	12.19945964	15.21919773	23.15695699	27.1045664	32.18575354	30.91701373	31.23037314	31.26418166	29.96240731	21.03894098	5.468282226	16.06603119
14:45:23.159	0.067788313	0.07316487	1.362387275	2.906456652	8.633163167	8.644696821	12.2018923	15.22186844	23.16169102	27.10769542	32.1901866	30.92161794	31.23965242	31.26970826	29.9682064	21.04587968	5.471025844	16.0710536
14:45:24.135	0.067801656	0.074061579	1.362953532	2.907161547	8.635342835	8.646164229	12.20335817	15.22341162	23.16252831	27.10867633	32.18829804	30.91830737	31.23435722	31.26648678	29.96381669	21.04173129	5.471029708	16.06857415
14:45:25.104	0.067893812	0.072819331	1.363178231	2.908035293	8.636242214	8.646764837	12.20473988	15.2257967	23.16514779	27.11090326	32.19213565	30.92180444	31.23391841	31.26699174	29.96264436	21.04092539	5.471837774	16.06730787
14:45:26.094	0.068085485	0.072982717	1.363782433	2.908737977	8.638557815	8.648942579	12.2072168	15.22687298	23.16737797	27.11199586	32.1891121	30.91684809	31.23166722	31.26466854	29.95805944	21.03710518	5.472203075	16.06592251
14:45:27.061	0.068421758	0.073498733	1.364186768	2.909730133	8.640740482	8.65060556	12.20970897	15.23104632	23.17282477	27.11759202	32.19870758	30.92833625	31.24308008	31.27438255	29.96967313	21.04767154	5.476018626	16.07385332
14:45:28.046	0.068612095	0.073452806	1.364654346	2.910373617	8.64189997	8.652887606	12.21240905	15.23292894	23.17607781	27.12080957	32.20005293	30.92941882	31.24270858	31.27587519	29.97033677	21.04766267	5.477045987	16.07434789
14:45:29.024	0.06845312	0.073215672	1.365534332	2.911405228	8.644038218	8.654680871	12.21445486	15.23538811	23.18017575	27.12486197	32.2075279	30.93408139	31.24936249	31.28179366	29.9774786	21.05354899	5.47964643	16.08002031
14:45:29.999	0.068304497	0.073270238	1.365726135	2.9125399	8.646081861	8.656734854	12.21775988	15.23772059	23.18293396	27.12748737	32.20931232	30.93483868	31.25051857	31.28278168	29.97580717	21.05211623	5.480425642	16.07875168
14:45:30.970	0.06843272	0.074267191	1.366755398	2.913168051	8.648592707	8.65883448	12.21981076	15.24202729	23.18865907	27.13488691	32.22015715	30.94718744	31.25866245	31.29374636	29.98923766	21.06477556	5.484656966	16.08932314
14:45:31.947	0.068513187	0.07375406	1.367104065	2.913912409	8.650195761	8.660705954	12.22315538	15.24514731	23.19306684	27.13901926	32.22200053	30.94969111	31.26338114	31.29873948	29.99290567	21.0650934	5.486249862	16.09126705
14:45:32.922	0.068382598	0.073010245	1.367612128	2.9147686	8.651455829	8.662153797	12.22523097	15.24746285	23.19598761	27.14171303	32.22509507	30.95111035	31.26280997	31.29875687	29.99125772	21.06442329	5.487134138	16.09029038
14:45:33.909	0.068408965	0.073967123	1.368122714	2.91592299	8.653602884	8.664865972	12.22733113	15.25052173	23.201014	27.14707683	32.22923886	30.95603678	31.26928338	31.30526988	29.99553542	21.0670534	5.489163937	16.09278686
14:45:34.877	0.068382234	0.074372608	1.368501746	2.916682707	8.655954066	8.66658107	12.22992734	15.25390225	23.20515917	27.15076525	32.23582896	30.96077979	31.27235587	31.30969021	29.99878193	21.06810698	5.490600878	16.09417752
14:45:35.859	0.068306413	0.073989064	1.369272932	2.917552043	8.657837984	8.667924585	12.23414433	15.2590993	23.2134855	27.16237624	32.25140858	30.97922239	31.2902332	31.32790587	30.02135052	21.08706227	5.496926477	16.1111418
14:45:36.830	0.068445321	0.073247906	1.369634251	2.918601198	8.659707177	8.671282079	12.23705773	15.26172759	23.21764579	27.16600689	32.2541663	30.9813547	31.29354367	31.33117396	30.02256313	21.08665801	5.497813069	16.11062528
14:45:37.815	0.068871092	0.07426349	1.370544589	2.919656913	8.661248079	8.672182381	12.23918269	15.26439605	23.22106891	27.1692696	32.25550452	30.98263695	31.29658401	31.33282383	30.02197359	21.08604487	5.498425293	16.10915771
14:45:38.786	0.068564846	0.073370428	1.370620009	2.920087711	8.66337747	8.673382568	12.23983061	15.26569418	23.2208995	27.16788713	32.2505796	30.97572247	31.28692653	31.32232606	30.00948194	21.0750014	5.496217179	16.09887727
14:45:39.758	0.068336076	0.073637572	1.371292526	2.921143441	8.665178643	8.675879734	12.24371064	15.26994158	23.22888579	27.17827763	32.26631325	30.99184166	31.30540975	31.33961891	30.02758796	21.09057735	5.501847491	16.11443889
14:45:40.742	0.068576838	0.073532343	1.371691788	2.922148722	8.666669278	8.677692488	12.24715422	15.27323201	23.23388121	27.18353871	32.27065575	31.00053489	31.31452044	31.34742958	30.03510298	21.09738327	5.50503883	16.12266571
14:45:41.708	0.068700719	0.074856454	1.372404788	2.922952291	8.668887395	8.679596589	12.24860033	15.27561025	23.23655473	27.18567411	32.2731696	30.99926349	31.31473207	31.34830695	30.03549063	21.09871942	5.505844135	16.12249855
14:45:42.695	0.06893714	0.074357823	1.372616823	2.923747063	8.670525851	8.680998719	12.25008575	15.27667804	23.23759974	27.18576178	32.27061636	30.99721231	31.30831507	31.34354719	30.02861536	21.09291572	5.50532638	16.11873538
14:45:43.669	0.068697016	0.073779033	1.373476562	2.924686572	8.672510328	8.682980979	12.25346503	15.27960703	23.24189895	27.19013381	32.27580811	31.00057291	31.31292443	31.34860787	30.0330868	21.09703705	5.507520073	16.12358583
14:45:44.649	0.069197925	0.074662116	1.373898596	2.925292775	8.673415524	8.685614952	12.2540533	15.28061586	23.24210038	27.18873824	32.26958418	30.99434576	31.30685327	31.34231606	30.02486828	21.09070767	5.506618732	16.11730828
14:45:45.621	0.06909138	0.074853054	1.37457111	2.926398933	8.675672036	8.686762979	12.2550581	15.2823939	23.24307707	27.18869152	32.26829183	30.98969564	31.30352085	31.33741478	30.01922883	21.08547324	5.505999625	16.11330079
14:45:46.598	0.069114408	0.074343521	1.375056396	2.927068729	8.677159741	8.687370025	12.25658828	15.28274027	23.24299996	27.18572074	32.2628297	30.98111634	31.29485031	31.3293303	30.00959461	21.07870914	5.504922619	16.10632957
14:45:47.582	0.068978475	0.074483225	1.375152048	2.92778237	8.677905241	8.689443463	12.25763253	15.28395686	23.24399874	27.185238	32.25925174	30.9797117	31.2928663	31.32564379	30.00635983	21.0768951	5.505633459	16.10591966
14:45:48.551	0.068975121	0.074863742	1.375632277	2.928612244	8.679206708	8.690402496	12.25908848	15.28393837	23.24350414	27.18249707	32.25578993	30.97235349	31.28346544	31.31899508	29.99455628	21.06991664	5.5047528	16.10046764
14:45:49.525	0.068813475	0.074669343	1.376147924	2.929650421	8.681714529	8.692925693	12.26200671	15.28784421	23.24832988	27.18819349	32.26356868	30.98086564	31.29440447	31.32933573	30.01178484	21.08545022	5.509971488	16.11624743
14:45:50.512	0.069266295	0.07367466	1.376825489	2.930495621	8.682986323	8.693154662	12.26283774	15.28819705	23.2478723	27.18613449	32.25980481	30.97495399	31.28714568	31.32343707	30.00257199	21.08037685	5.510061347	16.11358359
14:45:51.477	0.068977414	0.074857179	1.377386681	2.930963697	8.683776277	8.694641628	12.26269258	15.28643785	23.24510881	27.17993457	32.24619421	30.96016498	31.27269639	31.30670389	29.98212466	21.06600394	5.507064161	16.10091671
14:45:52.462	0.068963374	0.074369443	1.377715098	2.931675141	8.685943994	8.695861262	12.26449029	15.28841325	23.24793527	27.18262597	32.25016572	30.964073	31.27672464	31.31022653	29.98760698	21.07414073	5.510529322	16.10897438
14:45:53.439	0.069029147	0.075097196	1.37813966	2.932419486	8.687062084	8.697367708	12.26437467	15.28847566	23.24633239	27.17907304	32.24165381	30.95556686	31.26800303	31.30181574	29.97849393	21.06910041	5.510414195	16.10585579
14:45:54.414	0.068709209	0.074963387	1.378323867	2.933304167	8.687574037	8.697446841	12.26471514	15.28714042	23.24403269	27.17294002	32.22876904	30.94083659	31.25321815	31.28741528	29.95941343	21.05586413	5.50756633	16.09435413
14:45:55.377	0.069198095	0.074771046	1.379262038	2.934125273	8.688928749	8.700002674	12.26593322	15.28816489	23.24452227	27.17299775	32.22888852	30.93822621	31.25120549	31.28628602	29.9604885	21.05777706	5.509118794	16.09819297
14:45:56.364	0.069076189	0.074416503	1.379686594	2.93484329	8.690345416	8.701131045	12.2668386	15.28837406	23.24415765	27.17134997	32.22409954	30.9349799	31.24747889	31.28079431	29.95441892	21.05563132	5.509925686	16.09796295
14:45:57.337	0.069232796	0.075004799	1.380002365	2.935679732	8.691930699	8.702363775	12.2680119	15.29005401	23.24477019	27.17102915	32.22709474	30.93648299	31.24753279	31.28000029	29.95600917	21.06157783	5.512020033	16.1028127
14:45:58.325	0.0694789	0.075104855	1.380490171	2.936318809	8.6928447	8.703101091	12.2699979	15.29089355	23.24584599	27.17012338	32.22224606	30.93367035	31.24336393	31.27657286	29.95218338	21.06163416	5.513062858	16.10512637
14:45:59.297	0.069537326	0.074693411	1.38115762	2.937242959	8.695668887	8.705624275	12.27208827	15.2938884	23.25015282	27.17578562	32.2290987	30.94031919	31.25466174	31.28792883	29.96985971	21.078118	5.518463023	16.12126468
14:46:00.273	0.069407072	0.075597105	1.38154929	2.937846966	8.695828967	8.705709914	12.27165045	15.29214582	23.24654422	27.16747192	32.21222482	30.92382071	31.23731898	31.26828347	29.94317484	21.05735659	5.513726206	16.10353583
14:47:15.385	0.073260904	0.079875627	1.421293944	3.004265493	8.83608471	8.845482186	12.46330096	15.51766027	23.56874869	27.51004855	32.58017044	31.28872519	31.59790442	31.63983606	30.24844447	21.26079998	5.639719912	16.27378169
14:47:16.362	0.072873534	0.078167343	1.421650993	3.005193759	8.840046702	8.849421806	12.46862766	15.52207784	23.5745176	27.51895249	32.5982697	31.28969832	31.61321727	31.65039227	30.25747426	21.26612616	5.642159822	16.27697821
14:47:17.341	0.072684194	0.078744146	1.422298994	3.006564947	8.843624332	8.852312165	12.47412787	15.52762261	23.58345291	27.52979591	32.61338606	31.30601773	31.63166241	31.66653852	30.27332142	21.27898894	5.647173513	16.28682126
14:47:18.316	0.073177434	0.079048273	1.422688933	3.007348495	8.844050109	8.853957728	12.47566267	15.53041616	23.58625661	27.53206978	32.6120318	31.30465116	31.6274536	31.66457198	30.26755872	21.27224165	5.646175652	16.28083131
14:47:19.292	0.072555637	0.078649038	1.423453314	3.008509185	8.84697726	8.856743806	12.47881833	15.53564321	23.59477398	27.5423772	32.62739982	31.31703012	31.6473541	31.68157535	30.28663874	21.28554071	5.651348	16.2927842
14:47:20.262	0.073024833	0.078751469	1.423830602	3.009086618	8.848360995	8.858408906	12.48192933	15.53839447	23.59814319	27.54483451	32.63062231	31.32157887	31.64980814	31.68270991	30.28661103	21.28368019	5.651705102	16.29029298
14:47:21.248	0.073036193	0.078118952	1.424792327	3.010032434	8.850486912	8.859963268	12.48315692	15.54004239	23.60137176	27.54756253	32.63147391	31.32089843	31.65011083	31.68316327	30.2834389	21.28025785	5.651736904	16.28682512
14:47:22.212	0.072947035	0.079146955	1.424924203	3.01096727	8.852932088	8.862716726	12.48850832	15.54448352	23.60855055	27.55757528	32.64523747	31.33370263	31.66333263	31.6983437	30.3004233	21.29231019	5.656502942	16.29830942
14:47:23.198	0.073550144	0.079048463	1.425660758	3.011704782	8.854360226	8.86497495	12.48993418	15.54919358	23.61451979	27.56431995	32.64724608	31.34391051	31.67217708	31.70676565	30.30909391	21.29716006	5.658778425	16.30252877
14:47:24.177	0.073358799	0.078750075	1.42604564	3.012815045	8.857083381	8.866411983	12.49387801	15.55304171	23.62143408	27.57214997	32.65796436	31.35557635	31.68757036	31.71867236	30.32286286	21.30861634	5.662642528	16.31252255
14:47:25.153	0.073122039	0.07855039	1.426579792	3.013686304	8.859170837	8.868722315	12.49735093	15.55731399	23.628155	27.58095041	32.66827985	31.36852673	31.69964946	31.73165051	30.33314128	21.31881518	5.66650252	16.32083803
14:47:26.122	0.073031546	0.078643208	1.427030451	3.014643073	8.86061371	8.870022456	12.49985722	15.56100148	23.63239897	27.58592939	32.67555529	31.37398104	31.70939263	31.73851046	30.33875146	21.32518801	5.668818054	16.32484039
14:47:27.106	0.07324227	0.079595686	1.427731586	3.015380585	8.863109218	8.872652161	12.50424721	15.56676437	23.64053598	27.59711294	32.69041107	31.38641196	31.72616019	31.75392021	30.3569287	21.33976484	5.673870545	16.33648253
14:47:28.076	0.073328099	0.079861191	1.428134176	3.016150977	8.864661495	8.874428065	12.50583157	15.56779532	23.64307656	27.59731038	32.68928233	31.38600215	31.72219672	31.75028651	30.3510498	21.33392162	5.673447192	16.33142405
14:47:29.047	0.073345136	0.079336816	1.428946629	3.017373064	8.866408919	8.876099698	12.50707888	15.56906626	23.64389058	27.59729081	32.68330689	31.37795557	31.7164977	31.74142302	30.33950917	21.32285352	5.672012341	16.32460342
14:47:30.035	0.073725504	0.07952851	1.429576926	3.018114966	8.868416586	8.878318836	12.51018016	15.57366653	23.65052522	27.60434257	32.69863083	31.39173559	31.72917971	31.7543065	30.35662249	21.33811217	5.677121934	16.33493936
14:47:31.013	0.073276021	0.079747584	1.429782178	3.0190849	8.870169947	8.879938357	12.51296412	15.57590757	23.65430383	27.60905701	32.70151355	31.3950306	31.73561478	31.76029534	30.36279434	21.34272025	5.679727535	16.34047798
14:47:31.983	0.073462701	0.079516828	1.43040741	3.020074563	8.872003116	8.881323232	12.51623379	15.57917769	23.65831529	27.61369308	32.70782954	31.40254605	31.74033276	31.76768402	30.37182357	21.35147444	5.683527364	16.34768387
14:47:32.952	0.073582592	0.078838303	1.430873251	3.020719973	8.873685491	8.883470622	12.51723821	15.57993995	23.658812	27.61207632	32.70358686	31.39673989	31.73684246	31.76134584	30.36162866	21.34470954	5.682643311	16.34239018
14:47:33.938	0.073903852	0.080065522	1.431030435	3.021560546	8.874841624	8.884842518	12.51852035	15.58168762	23.65969445	27.61305783	32.70152877	31.39779841	31.73778321	31.76209141	30.36298493	21.34635481	5.684285791	16.34467938
14:47:34.920	0.073717517	0.079480637	1.431817593	3.022148957	8.87633481	8.886246988	12.51927704	15.58195656	23.66083269	27.61174662	32.69873775	31.39383396	31.73160273	31.75907404	30.35570981	21.34083286	5.684086013	16.34172603
14:47:35.887	0.073834403	0.080095897	1.432156933	3.023031177	8.877922567	8.887338581	12.52099522	15.58308382	23.66115147	27.61100889	32.69606921	31.38796187	31.73038356	31.75367212	30.35301708	21.34210133	5.684959091	16.34144132
14:47:36.873	0.073714857	0.079989851	1.43255447	3.024128296	8.879877016	8.889081963	12.52394781	15.58678168	23.66595126	27.61547049	32.70354497	31.39784018	31.73812468	31.76463939	30.36614325	21.35365895	5.689684504	16.35482796
14:47:37.842	0.073898198	0.079967659	1.433359334	3.024396565	8.881426344	8.891450946	12.52467961	15.58764534	23.66682727	27.61520017	32.70437343	31.39604122	31.73511771	31.76234732	30.3645346	21.35433967	5.690548671	16.35433426
14:47:38.825	0.074092893	0.080340968	1.433926382	3.025441058	8.882239492	8.892092906	12.52366178	15.58552642	23.66296423	27.60658636	32.68613142	31.37851104	31.71440691	31.74329323	30.33829611	21.33417881	5.686766551	16.33939573
14:47:39.790	0.073699846	0.079815217	1.434366922	3.026097431	8.882650471	8.892232977	12.52262398	15.58260627	23.65664077	27.59597947	32.66791364	31.35495635	31.68417516	31.7169199	30.30925913	21.30762879	5.6809212	16.3192622
14:47:40.775	0.07384612	0.079731744	1.43474169	3.027113422	8.883614419	8.893982877	12.5238962	15.58466826	23.65776328	27.5970297	32.67218975	31.35752703	31.68829598	31.71959321	30.31382404	21.31537206	5.684230358	16.32644829
14:47:41.745	0.073898554	0.079495838	1.43493682	3.028035116	8.885551084	8.895726212	12.52504439	15.58520916	23.65813602	27.59562974	32.66661187	31.35260503	31.68349191	31.71561096	30.3099044	21.31383965	5.685083743	16.32644033
14:47:42.731	0.0733008	0.079428071	1.435954214	3.028382336	8.886843233	8.896993841	12.52704032	15.58654957	23.65983907	27.59742139	32.66563179	31.3553977	31.68857854	31.71901641	30.31420933	21.32313197	5.689005289	16.33545652
14:47:43.694	0.073934966	0.07988824	1.436012721	3.029580305	8.888756226	8.8988675	12.52895676	15.58736754	23.66051427	27.59655908	32.66439917	31.35312291	31.68527299	31.71608441	30.31328796	21.32551392	5.690416275	16.33747575
14:47:44.680	0.073923951	0.079003378	1.436612661	3.029984536	8.889270758	8.899398679	12.52899475	15.58726812	23.65953871	27.5935815	32.65717823	31.34777436	31.67603791	31.70844629	30.30594207	21.32284286	5.690772971	16.33654677
14:47:45.650	0.074079241	0.079549977	1.437048145	3.030673806	8.89009274	8.900666258	12.5284031	15.58549379	23.65536714	27.58460571	32.64582253	31.3304159	31.65788413	31.69133618	30.28549036	21.30883037	5.688496488	16.32655261
14:47:46.635	0.073976726	0.080153997	1.437577245	3.031428868	8.89156525	8.901112711	12.52923914	15.58606358	23.65522776	27.58453785	32.64502135	31.32836877	31.6569507	31.69029092	30.28755535	21.31402404	5.691132523	16.33365447
14:47:47.614	0.073784379	0.079679656	1.437602868	3.032078677	8.893262454	8.901989284	12.53082856	15.58679047	23.65611074	27.58399198	32.64379845	31.3264678	31.65557778	31.68879677	30.28733521	21.31847193	5.693756242	16.3386916
14:47:48.583	0.07407692	0.079392337	1.438167383	3.032930206	8.893705975	8.903159103	12.52869037	15.58436043	23.65046842	27.57330525	32.62776277	31.30605392	31.63288	31.66905082	30.26433802	21.30329008	5.690575993	16.32724213
14:47:49.553	0.074063568	0.079669175	1.438430826	3.033082266	8.893561109	8.903507748	12.52896617	15.58253202	23.64642079	27.56686269	32.61657286	31.29301965	31.62268517	31.65608848	30.25034963	21.29569783	5.689751955	16.32432181
14:47:50.539	0.074056561	0.081471291	1.439149678	3.033786899	8.895412087	8.904045448	12.52926688	15.58245625	23.64567754	27.56482099	32.61382809	31.29018913	31.61639129	31.65107686	30.24635389	21.29481799	5.690596991	16.32378151
14:47:51.517	0.07397475	0.081036088	1.439630706	3.034127537	8.895190371	8.903944428	12.52752035	15.57829241	23.63737155	27.5500142	32.59018847	31.26293323	31.58440429	31.62082717	30.21418099	21.26753421	5.684605822	16.30387067
14:47:52.487	0.073967743	0.080388971	1.439884029	3.034970298	8.896520916	8.905283702	12.52850001	15.57947211	23.63748114	27.54994953	32.58605932	31.26278017	31.58404288	31.62168024	30.21639452	21.27576907	5.687997163	16.31201724
14:47:53.472	0.074242585	0.080160274	1.440281569	3.035595994	8.897100497	8.905951745	12.52690224	15.57702533	23.63383498	27.54229503	32.57184547	31.25096509	31.56676953	31.60599869	30.20001955	21.26449917	5.686642616	16.3046549
14:47:54.442	0.07429502	0.080080319	1.440939697	3.036809322	8.899034219	8.908894274	12.52934913	15.58017889	23.63719594	27.5458698	32.57957603	31.25566307	31.5736125	31.61347736	30.21135912	21.28010996	5.691987127	16.31787642
14:47:55.421	0.0746086	0.080576711	1.441400486	3.037408701	8.90045941	8.910429099	12.53196463	15.58218507	23.63947239	27.54709257	32.57939152	31.25727462	31.57743459	31.61610803	30.21755402	21.28820999	5.695612799	16.32701758
14:47:56.391	0.07451243	0.080037824	1.441785371	3.038220766	8.900929548	8.910269399	12.53079303	15.57938831	23.63361344	27.5357448	32.55894107	31.23717361	31.55299398	31.59169916	30.18677825	21.26505783	5.690316842	16.30926066
14:47:57.376	0.074628314	0.081161376	1.442400494	3.039258691	8.902348845	8.911497933	12.53077649	15.57857571	23.63081888	27.52979049	32.54694232	31.2273206	31.5425361	31.57859873	30.17224382	21.25621937	5.688769598	16.30345198
14:47:58.346	0.074540492	0.081271534	1.443063683	3.03970896	8.902165544	8.91154027	12.52871265	15.57436275	23.62259891	27.51612708	32.51795164	31.20063579	31.51148456	31.54914287	30.13689499	21.2271425	5.682210381	16.27930411
14:47:59.324	0.074958597	0.081497563	1.443129787	3.040310533	8.90363213	8.913146785	12.53013354	15.57618303	23.6247516	27.51820585	32.524874	31.20434834	31.52008578	31.55630381	30.14919808	21.24555877	5.687817066	16.297999
14:48:00.310	0.074712152	0.080369969	1.443787922	3.041414241	8.905766965	8.9149684	12.533567	15.57905624	23.62874604	27.52286129	32.5325348	31.21104242	31.52924507	31.56594095	30.16472786	21.26052938	5.693026513	16.31226742
14:49:15.818	0.078516364	0.087242463	1.48104986	3.098934955	9.009484143	9.017861187	12.63091186	15.66253504	23.70203419	27.51244214	32.42389248	31.05511286	31.36627439	31.39776874	29.98152339	21.23942049	5.780291237	16.35678525
14:49:16.790	0.077942647	0.084106492	1.480958902	3.100279371	9.010916276	9.019224341	12.62796491	15.65889694	23.69657618	27.50174753	32.38854941	31.02497053	31.34046797	31.37344825	29.94415827	21.20652276	5.773734329	16.33314617
14:49:17.775	0.077910925	0.08323033	1.48154347	3.101290498	9.012927952	9.020926414	12.62938014	15.6594585	23.69678265	27.49968292	32.38162167	31.02019103	31.33023281	31.36608113	29.93670389	21.20242884	5.774549738	16.33159737
14:49:18.741	0.07807022	0.083787439	1.482588505	3.102218296	9.013656365	9.023351896	12.63067139	15.66015353	23.69671174	27.4979179	32.37831189	31.01314518	31.32415019	31.35815646	29.92657194	21.19287506	5.773006327	16.32450401
14:49:19.718	0.078048182	0.085052557	1.482725253	3.103260119	9.015469929	9.024669435	12.63254263	15.66220564	23.69951145	27.49933247	32.3791294	31.01430376	31.32694402	31.36215229	29.93148721	21.19890338	5.775464875	16.33061309
14:49:20.698	0.078148368	0.08534385	1.483064405	3.103916023	9.016698054	9.025745835	12.63321926	15.66205739	23.69980337	27.49861424	32.37819544	31.01407895	31.32433961	31.35817582	29.92879318	21.19917678	5.7766293	16.33176537
14:49:21.672	0.078207479	0.085227625	1.483492109	3.104670598	9.017089404	9.025831585	12.6332812	15.66175027	23.69659747	27.49233252	32.36520487	30.99323285	31.30455936	31.34064532	29.90577463	21.17863266	5.772070035	16.31495262
14:49:22.660	0.078435901	0.085408199	1.48422342	3.105436142	9.018681222	9.027618388	12.63423048	15.66185892	23.69587502	27.48966319	32.36012684	30.98503261	31.29607819	31.33260244	29.89492834	21.16957522	5.77077245	16.30897397
14:49:23.630	0.078354421	0.084137994	1.484613173	3.106030647	9.020660359	9.029294377	12.6349616	15.66285309	23.6978393	27.49029215	32.35900339	30.98726475	31.29846431	31.33291869	29.89584246	21.17401322	5.772836039	16.31273216
14:49:24.603	0.078468633	0.084796381	1.485119308	3.10678303	9.021657849	9.029836344	12.6372988	15.66453171	23.69994269	27.4922547	32.36180386	30.98743611	31.3004914	31.33638652	29.90188992	21.18165377	5.776122282	16.32109832
14:49:25.580	0.078161739	0.084043987	1.485177624	3.107592425	9.022977632	9.032372637	12.63856034	15.66580305	23.70012645	27.4909555	32.36115472	30.98380855	31.29727591	31.33170199	29.89573539	21.17912368	5.776224242	16.31980183
14:49:26.557	0.078415207	0.08516182	1.48569135	3.108428133	9.024297416	9.033618487	12.63889988	15.66514779	23.69856887	27.48682855	32.35089266	30.97294614	31.2839723	31.31991345	29.8791709	21.16660147	5.773732649	16.30974426
14:49:27.543	0.078621588	0.085081643	1.486374591	3.10893932	9.025738437	9.034219125	12.63915518	15.66605243	23.69882944	27.48560774	32.34655522	30.96824491	31.27943104	31.31447234	29.87329591	21.1610998	5.773324813	16.30663194
14:49:28.506	0.079176609	0.084392935	1.486782053	3.109582064	9.026496418	9.035575756	12.64083307	15.66714122	23.69978805	27.48549671	32.34575039	30.96769706	31.27960866	31.31462179	29.87433075	21.16623314	5.775376094	16.31133327
14:49:29.496	0.078808269	0.085285636	1.487452645	3.110586615	9.028490363	9.03624809	12.64179227	15.66863736	23.70069845	27.48486818	32.34453722	30.96319485	31.27688775	31.31190419	29.87092731	21.16603023	5.775878604	16.31149975
14:49:30.465	0.078920478	0.084770046	1.488077693	3.111233747	9.029402103	9.037389654	12.64331155	15.66827615	23.70038742	27.48286344	32.34116784	30.95888664	31.26984541	31.30706468	29.8645412	21.16310233	5.775883076	16.31069065
14:49:31.434	0.078536776	0.084480446	1.48868503	3.112045333	9.030124609	9.03827704	12.64237713	15.66757525	23.69760759	27.47734691	32.32968556	30.94864867	31.25849621	31.29307252	29.84802841	21.15075078	5.773358372	16.30149497
14:49:32.414	0.078731803	0.084639476	1.488725637	3.112451268	9.03182878	9.040213738	12.64422856	15.66934514	23.69923064	27.47953634	32.33350871	30.94858541	31.26251404	31.29593059	29.85303689	21.15917794	5.776855023	16.30959473
14:49:33.389	0.079057404	0.084135044	1.489145751	3.113271627	9.032258571	9.0402278	12.64425086	15.66915463	23.69789766	27.47570639	32.32521638	30.94266581	31.25262144	31.28763354	29.84351673	21.15356363	5.776035755	16.30572535
14:49:34.376	0.078777893	0.085241202	1.489565867	3.114339768	9.034048497	9.042829281	12.64574045	15.67037868	23.69939642	27.47559151	32.32526581	30.94325047	31.25554226	31.28756267	29.8460261	21.15946959	5.778781101	16.3116082
14:49:35.356	0.078864388	0.084852726	1.490034053	3.11461414	9.035193836	9.044218519	12.64731429	15.67087939	23.70105816	27.47646972	32.32558749	30.9443754	31.25709006	31.2892049	29.85053987	21.16703207	5.782095749	16.32088351
14:49:36.325	0.078948879	0.084908418	1.49059838	3.115642807	9.035945911	9.045229737	12.64716803	15.67039481	23.69880462	27.471056	32.31637825	30.93252784	31.24205219	31.27683458	29.83668939	21.15572967	5.780250964	16.31195148
14:49:37.297	0.07919333	0.085071911	1.491218369	3.116285554	9.036834002	9.046547276	12.6476414	15.67034795	23.69682177	27.4673863	32.31175998	30.92491037	31.23588147	31.26766073	29.82865469	21.15023458	5.780334127	16.30885827
14:49:38.272	0.07878859	0.084765917	1.491744746	3.117020398	9.038002991	9.04728477	12.64878397	15.67088245	23.69707532	27.46649812	32.31015366	30.92002385	31.23313976	31.2643963	29.82685943	21.15356037	5.782107854	16.31200482
14:49:39.257	0.078963247	0.085730885	1.491853665	3.117691655	9.03947654	9.048022274	12.65015459	15.67134768	23.69672457	27.46515227	32.3043702	30.91747787	31.22740638	31.26154566	29.82529577	21.15409074	5.78379493	16.31541079
14:49:40.229	0.079283504	0.085394079	1.492605217	3.118382643	9.040447421	9.048916183	12.65120298	15.67255141	23.69686222	27.46441282	32.30499746	30.91527378	31.22752468	31.25938536	29.82267758	21.15564603	5.785620154	16.31894551
14:49:41.204	0.079271818	0.085307293	1.492883649	3.119227123	9.041317776	9.051374271	12.65019917	15.67152436	23.69516554	27.4603323	32.29582047	30.90397507	31.21624259	31.24884906	29.81070982	21.14891298	5.784157446	16.31229543
14:49:42.191	0.078914164	0.085557216	1.493359427	3.119543159	9.04261392	9.050645363	12.65125751	15.67130684	23.6938473	27.45593065	32.28767839	30.89312883	31.20656559	31.24018952	29.80040953	21.14029168	5.783512158	16.30737112
14:49:43.166	0.078970938	0.084653335	1.493863034	3.120600335	9.04426191	9.053396736	12.65378309	15.67435605	23.69892995	27.46157544	32.29890803	30.90709098	31.22168852	31.25303395	29.82096101	21.1615432	5.790875137	16.3276186
14:49:44.134	0.079068787	0.085189843	1.494427361	3.121166337	9.04511156	9.053124026	12.65385989	15.67360276	23.69714861	27.45608241	32.28840479	30.89613296	31.20852546	31.240969	29.80661824	21.15031702	5.789344772	16.31996108
14:49:45.110	0.079271829	0.085809948	1.494614711	3.121563501	9.046123842	9.055067242	12.6548141	15.6738263	23.69590074	27.45430489	32.28202229	30.89145765	31.20160199	31.23421516	29.79947795	21.14776833	5.789470074	16.31753097
14:49:46.091	0.079137919	0.086410398	1.495209401	3.122454031	9.047703833	9.055759122	12.65611532	15.67467516	23.69688908	27.45478397	32.28446454	30.89129466	31.20259467	31.23456292	29.80064772	21.15259172	5.792031407	16.32250106
14:49:47.050	0.079109536	0.085220105	1.495260126	3.123368674	9.048716098	9.057141824	12.65584015	15.67433928	23.6953173	27.45042122	32.27307154	30.87695831	31.1876812	31.2221745	29.78595609	21.14246114	5.79042941	16.31430756
14:49:48.051	0.079232097	0.084881324	1.496064814	3.12409037	9.050514914	9.059137207	12.65677956	15.67733447	23.69895875	27.45519519	32.27990284	30.88684438	31.19943377	31.23173574	29.80030374	21.15795514	5.795905843	16.32877515
14:49:49.027	0.07928119	0.086115967	1.496826488	3.12501379	9.051541981	9.061073907	12.6586756	15.67686681	23.69772637	27.4518216	32.27585903	30.87767812	31.18969859	31.22384534	29.78873738	21.15028463	5.795242377	16.32391022
14:49:50.004	0.079426459	0.086275597	1.497368046	3.125586373	9.05281742	9.062743395	12.66050225	15.67970478	23.70075026	27.45514012	32.27950433	30.88487191	31.19781599	31.2316571	29.80238768	21.16506902	5.800738217	16.33702935
14:49:50.979	0.079567721	0.086016381	1.497755271	3.126468132	9.054465412	9.063311439	12.66157047	15.68030351	23.70108891	27.45368204	32.2763922	30.87996399	31.19426561	31.22651358	29.79767349	21.16236482	5.80154302	16.33720026
14:49:51.954	0.079685941	0.0858902	1.498152616	3.127224904	9.055918257	9.064413911	12.66160268	15.67989668	23.69984886	27.45082171	32.26905239	30.87130897	31.18562057	31.21819598	29.78570774	21.15370598	5.800011927	16.33038528
14:49:52.920	0.079701305	0.085851565	1.498496829	3.12760891	9.056761993	9.065320851	12.66223962	15.67872426	23.69691462	27.44372188	32.25490391	30.86005826	31.16990703	31.20151793	29.7623269	21.13613943	5.79617596	16.31772216
14:49:53.909	0.079852585	0.085791214	1.498899236	3.128591538	9.058096582	9.065856324	12.66234127	15.6787349	23.6965791	27.4416118	32.25124755	30.85043417	31.16379513	31.19372585	29.75355839	21.12968656	5.79518845	16.3111798
14:49:54.882	0.079908023	0.086431746	1.499549588	3.129236481	9.058825012	9.067141282	12.66315172	15.67871339	23.69505287	27.43762327	32.24316198	30.8381551	31.1540306	31.18244907	29.74145318	21.12054143	5.793533827	16.30291399
14:49:55.859	0.079924723	0.086194845	1.499969704	3.130100698	9.059908261	9.068686941	12.66448267	15.68072833	23.69790647	27.44089615	32.24576364	30.84389445	31.16181066	31.18976553	29.74924077	21.13182629	5.797680675	16.31449657
14:49:56.833	0.080054965	0.086199125	1.500346809	3.130725907	9.061653829	9.069815483	12.66686946	15.68182898	23.69890298	27.44033899	32.24331919	30.84224585	31.15714054	31.18874241	29.74758861	21.13314308	5.799641628	16.31790495
14:49:57.810	0.079986508	0.086284083	1.501050292	3.131638365	9.062769603	9.071080893	12.66651503	15.68249362	23.69818131	27.43921134	32.23876699	30.83454027	31.15335673	31.18026744	29.73922566	21.12675923	5.798499433	16.31179592
14:49:58.792	0.079799501	0.085880674	1.501642454	3.132750363	9.06373163	9.073056708	12.66842596	15.68375315	23.70127444	27.44060232	32.24073352	30.83680887	31.15389811	31.18396941	29.74449199	21.13241455	5.801230833	16.31784336
14:49:59.757	0.0794709	0.086250586	1.501852574	3.133228657	9.065592504	9.073585639	12.67052027	15.68483012	23.70114169	27.43970463	32.23862119	30.83429661	31.15197521	31.18081038	29.74041864	21.13039493	5.801872045	16.31789349
14:50:00.746	0.079798171	0.086574149	1.502672442	3.133742041	9.066261816	9.075027034	12.67044346	15.68547451	23.70224553	27.43957825	32.23815551	30.83522567	31.15050686	31.17872525	29.73894914	21.13020849	5.80259824	16.3185718
14:51:15.840	0.085287322	0.089806225	1.539821987	3.193210921	9.178715943	9.187603463	12.79345343	15.80979638	23.85320998	27.54519282	32.29360234	30.84015195	31.14997169	31.18046702	29.70580451	21.16750606	5.890034012	16.39308636
14:51:16.819	0.08364057	0.090263598	1.540214435	3.19404549	9.180251336	9.187059037	12.79648449	15.8116416	23.85559657	27.54567883	32.28176901	30.84094661	31.15199007	31.17940533	29.69806744	21.16450797	5.889560815	16.3924827
14:51:17.778	0.083263805	0.090237765	1.541021851	3.195301159	9.182124252	9.188796108	12.79952174	15.81549456	23.86003462	27.55007555	32.28769303	30.84470297	31.1553668	31.18478275	29.70320259	21.16969837	5.892115422	16.39665013
14:51:18.769	0.083443385	0.089169131	1.541227048	3.196087419	9.183236542	9.190584554	12.79961763	15.81515361	23.85902396	27.5453071	32.27725099	30.83243573	31.14120815	31.16941117	29.67935152	21.14843615	5.886876434	16.37901618
14:51:19.732	0.083609276	0.08962393	1.541882651	3.196468179	9.184316955	9.191995655	12.80144516	15.81700704	23.86183699	27.54857524	32.27680963	30.8346933	31.14325677	31.17277422	29.68342695	21.15116027	5.888764865	16.38274044
14:51:20.722	0.083312989	0.09082971	1.542310489	3.197473707	9.185914154	9.193758039	12.80431682	15.82026214	23.86712422	27.55427895	32.28707286	30.84486608	31.15553611	31.18322653	29.69920345	21.16601171	5.893812195	16.39567895
14:51:21.699	0.083775083	0.089386875	1.542804136	3.198571394	9.186985359	9.195722752	12.80559324	15.82074206	23.86671785	27.5525887	32.28011268	30.83705155	31.14540418	31.17551847	29.68441268	21.15324493	5.891269666	16.38506535
14:51:22.676	0.083785356	0.090551458	1.543535602	3.199241506	9.189493499	9.19765487	12.80675565	15.82221389	23.8686867	27.5544081	32.28372943	30.83532817	31.14370113	31.17569459	29.68293263	21.15160811	5.891522109	16.38226725
14:51:23.646	0.083573224	0.090008947	1.544036851	3.200080489	9.190777733	9.199261287	12.80901389	15.82526802	23.87299248	27.55879209	32.28751894	30.84192752	31.15311896	31.18191218	29.69182595	21.16027666	5.895212312	16.39044843
14:51:24.625	0.08370839	0.089751381	1.544338209	3.200662879	9.192333762	9.199929022	12.81005223	15.8266264	23.87465945	27.55995034	32.28782757	30.84232826	31.15101619	31.17992833	29.68677065	21.15575595	5.894997233	16.38647604
14:51:25.598	0.083721334	0.090371821	1.544907759	3.201464566	9.193748005	9.201418048	12.81286042	15.82938786	23.87919712	27.56633943	32.29471296	30.85087937	31.15746799	31.18834926	29.69850794	21.16809945	5.899623458	16.39692005
14:51:26.573	0.083730604	0.090219822	1.545274904	3.202259661	9.195874743	9.203799856	12.81581219	15.83316464	23.8855141	27.57354868	32.30462834	30.86669672	31.17571169	31.2048107	29.72035576	21.19007796	5.906792231	16.41669603
14:51:27.544	0.084107208	0.090823953	1.545649647	3.203429719	9.19813757	9.205875446	12.81962165	15.83785762	23.89394343	27.58562384	32.31984577	30.88400699	31.19686929	31.22558034	29.74751896	21.21510342	5.915102501	16.43710766
14:51:28.524	0.084351236	0.090411042	1.546464584	3.204229167	9.199244136	9.206745163	12.8212695	15.83963654	23.89561801	27.58575633	32.31699168	30.88439605	31.19371372	31.22484422	29.74227472	21.21032144	5.915027756	16.43432158
14:51:29.503	0.084179177	0.090091682	1.547142903	3.204666831	9.200743949	9.208761893	12.82236228	15.84102184	23.8962714	27.58549012	32.31841591	30.87767398	31.19021637	31.22019473	29.73315111	21.20246333	5.914020907	16.42895433
14:51:30.476	0.083946676	0.091194461	1.547606186	3.205766703	9.202249809	9.209169056	12.82407002	15.8424381	23.89876647	27.58820995	32.3181906	30.88000071	31.19340722	31.22327306	29.73679821	21.20832	5.916681701	16.43213483
14:51:31.463	0.084141281	0.089862354	1.548236413	3.206465245	9.203424195	9.210683774	12.82500862	15.8422765	23.89799581	27.58541327	32.31102432	30.87274987	31.18262522	31.21264981	29.72221661	21.19326259	5.914441014	16.4229687
14:51:32.441	0.084088105	0.090747132	1.548294888	3.207045429	9.204829399	9.212524544	12.82612125	15.84430056	23.90002637	27.58646893	32.31116133	30.87066	31.18094246	31.21185816	29.71977183	21.19257139	5.915373332	16.42240639
14:51:33.404	0.08481868	0.090645772	1.548963117	3.208079568	9.206039812	9.213850821	12.82833512	15.84640713	23.90297074	27.58891634	32.31792914	30.87415956	31.1877228	31.21705349	29.72659709	21.19989092	5.919026941	16.4296626
14:51:34.390	0.084771847	0.091019026	1.549403595	3.208887739	9.207631081	9.214850701	12.82956617	15.8464433	23.90333742	27.58709973	32.3110338	30.8697991	31.17945005	31.21125525	29.72052825	21.19485743	5.918902405	16.42668167
14:51:35.359	0.084588101	0.091223205	1.549661954	3.209196079	9.20845403	9.215661988	12.82998546	15.84684775	23.90328734	27.58678903	32.30895407	30.86491033	31.17648436	31.20794716	29.71613549	21.19339677	5.919673485	16.42574976
14:51:36.344	0.084795728	0.09128062	1.550327598	3.209857345	9.20999209	9.215775583	12.83155358	15.84751427	23.90293458	27.58483581	32.30659446	30.85876973	31.16886518	31.20040633	29.70588211	21.18536928	5.91895396	16.42062983
14:51:37.312	0.084524492	0.090473774	1.550725104	3.210898023	9.211193492	9.217942399	12.83045135	15.84676307	23.90153839	27.57977383	32.29558932	30.84789643	31.1556789	31.18597699	29.68785303	21.17135167	5.916291141	16.41079536
14:51:38.297	0.084515728	0.091301043	1.551287017	3.211710575	9.211611006	9.219561385	12.83231683	15.84778271	23.901263	27.57902844	32.2924772	30.8398369	31.1503872	31.17894253	29.67955176	21.16686274	5.916162511	16.40693203
14:51:39.272	0.084415801	0.091405663	1.551851481	3.212510022	9.213421282	9.221728014	12.83301821	15.84832006	23.90107331	27.57647247	32.28731362	30.83377116	31.14462662	31.17420501	29.67398185	21.16663236	5.917519444	16.4080551
14:51:40.254	0.084596045	0.091003055	1.552087035	3.213057279	9.214705122	9.221476722	12.83494332	15.84943796	23.90272449	27.57789231	32.29032843	30.83538035	31.14584567	31.17598776	29.68007095	21.17544905	5.92126001	16.41719485
14:51:41.220	0.084700153	0.090845909	1.552767894	3.213720827	9.216075069	9.223278607	12.83423772	15.84850786	23.89988172	27.5725344	32.28014912	30.82403104	31.13529347	31.16272917	29.66437145	21.16517001	5.91999665	16.41049503
14:51:42.195	0.084866371	0.091547012	1.552998403	3.214189185	9.216439583	9.224135334	12.83387848	15.84598362	23.89468653	27.5617292	32.261723	30.79885775	31.11170936	31.13851578	29.63190584	21.13794958	5.913479467	16.38718881
14:51:43.171	0.084469577	0.091605286	1.553395884	3.215284617	9.218093111	9.225239671	12.83530833	15.84780158	23.89858165	27.5655083	32.26664674	30.80609831	31.11831001	31.1458554	29.64347544	21.15480785	5.918984289	16.40382473
14:51:44.151	0.084775379	0.091502208	1.554198141	3.216040173	9.218463414	9.22672188	12.83482487	15.84648664	23.89447703	27.557836	32.2509135	30.78719737	31.09737868	31.12622901	29.61780338	21.13195562	5.914083344	16.38643858
14:51:45.131	0.084627699	0.091675486	1.554388157	3.216881237	9.220418397	9.228484302	12.83778586	15.85039759	23.9009868	27.56658239	32.26378483	30.80600675	31.12054221	31.14600401	29.64580461	21.16348195	5.923541338	16.41516203
14:51:46.105	0.084935171	0.092255574	1.554826117	3.217652168	9.221947777	9.230188207	12.83897295	15.85121884	23.90184159	27.56723972	32.26398874	30.80218812	31.11757594	31.14371865	29.64486736	21.16534847	5.924836231	16.41765138
14:51:47.093	0.08475944	0.091677885	1.555337412	3.218013008	9.223098392	9.230138774	12.83965858	15.85132407	23.90090843	27.56397604	32.25935149	30.79434508	31.10894137	31.13261381	29.63249935	21.15686027	5.923107743	16.41155193
14:51:48.058	0.08487056	0.09180396	1.556119457	3.218913346	9.22511283	9.2325532	12.84140625	15.85351977	23.9038371	27.56702705	32.25994638	30.79628582	31.11227968	31.13631309	29.63746644	21.1619054	5.92586221	16.4173012
14:51:49.044	0.084997372	0.091388481	1.55669147	3.219839878	9.22598557	9.233911414	12.84333593	15.8555901	23.90664845	27.56927818	32.26211556	30.79595858	31.11158548	31.13905068	29.63854647	21.16589416	5.927558685	16.41938597
14:51:50.005	0.084946534	0.091607247	1.557309077	3.220898096	9.227722177	9.234905278	12.84496487	15.85758846	23.90926013	27.57226122	32.26486313	30.80070107	31.11301245	31.1404684	29.63994165	21.16578397	5.929377293	16.42156218
14:51:50.986	0.084876995	0.09101068	1.557261274	3.221326936	9.229594305	9.236752346	12.84796035	15.85969132	23.91311616	27.57505975	32.26985846	30.80673645	31.12018137	31.14521997	29.64339783	21.17060833	5.931539051	16.42396589
14:51:51.961	0.085015162	0.091174517	1.557967393	3.222433309	9.231410391	9.238886279	12.85113955	15.86378329	23.91798598	27.58128839	32.27675589	30.81259571	31.12332505	31.15373985	29.65484881	21.17946911	5.934901894	16.43058028
14:51:52.937	0.085111253	0.091761467	1.558531833	3.223221752	9.233767473	9.241196127	12.85343652	15.86732941	23.92472789	27.58976141	32.28734319	30.8284653	31.13942949	31.16875821	29.67269311	21.19596411	5.940714495	16.44703246
14:51:53.922	0.08524708	0.091563983	1.55912408	3.223996988	9.234997932	9.243036554	12.85730388	15.8714575	23.93010765	27.59637624	32.294054	30.83765504	31.14969078	31.17797204	29.68442168	21.20446839	5.943911749	16.45368399
14:51:54.902	0.085080368	0.091598225	1.559802353	3.224945461	9.236571448	9.245137754	12.85810885	15.87127277	23.93037404	27.59372867	32.28846092	30.82761794	31.13757099	31.16664504	29.66526404	21.18690074	5.939352488	16.43643876
14:51:55.877	0.084964079	0.091649632	1.560045496	3.225429136	9.238346108	9.245199374	12.85872085	15.87332876	23.93293064	27.59649354	32.28949628	30.82769244	31.13666191	31.16720403	29.66103538	21.18222809	5.939109451	16.43325592
14:51:56.858	0.085218786	0.091604057	1.560531493	3.226478455	9.239694897	9.24755468	12.86142874	15.87574908	23.93677882	27.60027175	32.29301929	30.83151453	31.14058622	31.16997628	29.66352728	21.18169434	5.939972328	16.43385163
14:51:57.827	0.085387005	0.092281978	1.561202196	3.227231842	9.241726889	9.249558366	12.86397384	15.87942409	23.94131621	27.60588556	32.29839252	30.83802365	31.14586622	31.17729413	29.67037229	21.18540049	5.941838591	16.43636931
14:51:58.814	0.085756582	0.092526486	1.561662877	3.228123259	9.243131694	9.251398701	12.86689439	15.88230667	23.94595308	27.61103025	32.30538663	30.84340251	31.15351989	31.18348249	29.67638755	21.18931125	5.943760344	16.43874264
14:51:59.785	0.085295679	0.091754844	1.562202019	3.229093691	9.245781505	9.253148176	12.87000425	15.88663522	23.95261001	27.61933256	32.31415896	30.85631077	31.16833932	31.19536424	29.68955437	21.20026023	5.947948002	16.44855782
14:53:15.204	0.089905103	0.095417046	1.599827224	3.290029228	9.35844551	9.367443979	12.99414831	16.01475053	24.11799498	27.74748601	32.38245492	30.87065153	31.17322097	31.20445605	29.63407354	21.20281918	6.020177606	16.488448
14:53:16.175	0.089131696	0.095784192	1.600720437	3.289993349	9.359283905	9.36611895	12.99678096	16.01574892	24.12115489	27.74807628	32.37943656	30.87604609	31.18103394	31.2059023	29.63707216	21.20304089	6.02116492	16.48900431
14:53:17.153	0.089247138	0.096589846	1.601370792	3.291393362	9.361871994	9.368396718	13.00070119	16.0199417	24.12825132	27.75618308	32.39153432	30.8893315	31.19124274	31.22073942	29.6562475	21.22119342	6.027842184	16.50516508
14:53:18.128	0.089137531	0.09571955	1.602069214	3.291776181	9.363209822	9.369703768	13.00218425	16.02207619	24.13018888	27.75800299	32.39134606	30.88680472	31.19570899	31.2214766	29.65670823	21.2225795	6.029567628	16.50876387
14:53:19.115	0.089113735	0.096953412	1.60250959	3.292614922	9.364293175	9.370932358	13.0038053	16.02343787	24.13118984	27.75870539	32.38916975	30.88828791	31.19270447	31.2196264	29.65533292	21.22315645	6.030910611	16.51011329
14:53:20.091	0.08889561	0.096211839	1.602909518	3.293541409	9.3652142	9.37198528	13.00325225	16.02327563	24.13001028	27.75537703	32.38193423	30.879559	31.18448282	31.2102628	29.64224443	21.21333904	6.028963541	16.50143891
14:53:21.069	0.089467829	0.09615506	1.603218375	3.294391154	9.367234735	9.373025121	13.00448741	16.02324325	24.12970462	27.75129676	32.37174899	30.86956609	31.1739408	31.19960678	29.62852153	21.20339899	6.027135533	16.4939625
14:53:22.033	0.089622672	0.095439236	1.603883932	3.294892405	9.368200354	9.374860129	13.005872	16.02412059	24.13053677	27.75091964	32.36964245	30.86499697	31.17106157	31.19508906	29.62187191	21.20091427	6.027110088	16.49241366
14:53:23.012	0.089771169	0.096020911	1.60450139	3.295910943	9.368973506	9.3760563	13.00631448	16.02476526	24.13098903	27.7512129	32.36748737	30.86472524	31.1672464	31.19352217	29.62078182	21.20215651	6.028519895	16.49511575
14:53:23.989	0.08981983	0.096533075	1.604840601	3.296455965	9.371005864	9.376614024	13.008372	16.02583902	24.13201377	27.75064077	32.36889569	30.8594438	31.16518211	31.18932689	29.61619393	21.19969506	6.028680319	16.494568
14:53:24.977	0.089578665	0.095447395	1.605465624	3.297467872	9.371565988	9.378656952	13.0095768	16.02714819	24.13265112	27.75012441	32.36588142	30.85785652	31.15991996	31.18715098	29.61430229	21.20197266	6.030108211	16.49688129
14:53:25.940	0.089534837	0.096278785	1.605708743	3.298271647	9.373205527	9.380765588	13.01065428	16.02737041	24.13307339	27.74882487	32.35703833	30.85134255	31.15463327	31.17952177	29.6040846	21.19566713	6.029427207	16.49278497
14:53:26.931	0.090060639	0.097034653	1.606128863	3.298930584	9.373854248	9.381244798	13.01231957	16.02858136	24.13417463	27.74942435	32.35860281	30.85100164	31.15184574	31.18014259	29.60256772	21.19677507	6.030714217	16.49511097
14:53:27.902	0.089523307	0.096227013	1.606862691	3.299453708	9.3757271	9.382897179	13.01295072	16.02939893	24.13382297	27.74736088	32.35347993	30.84201974	31.14547488	31.17382585	29.59601023	21.19206818	6.029872702	16.49137023
14:53:28.886	0.089763959	0.096415659	1.607454833	3.300338476	9.376296164	9.385031374	13.01353652	16.03097859	24.13628588	27.75033009	32.35725591	30.84713388	31.14869083	31.17770657	29.59740746	21.19630493	6.032235332	16.4972791
14:53:29.856	0.089712451	0.096283367	1.60807736	3.301245239	9.378600562	9.385230898	13.01486122	16.03089959	24.13613537	27.74707087	32.34886058	30.83571944	31.13696094	31.16549222	29.58181128	21.18216418	6.028714171	16.48548263
14:53:30.834	0.090087664	0.096544953	1.60847221	3.301882314	9.379512617	9.386459621	13.01655201	16.03179925	24.13642525	27.74646449	32.3440864	30.82769499	31.12890048	31.15787071	29.5728569	21.17200999	6.027382422	16.47872412
14:53:31.809	0.089776383	0.096573988	1.608664704	3.302753969	9.381074996	9.387968552	13.01657856	16.03284608	24.13838593	27.7470657	32.34038822	30.82565106	31.12671288	31.15427196	29.56714382	21.17041311	6.027062044	16.47681416
14:53:32.783	0.089981641	0.096588435	1.6090115	3.303500671	9.383060059	9.389770675	13.01912157	16.03580612	24.14280619	27.75191515	32.34809819	30.83504027	31.1357464	31.16401957	29.57939179	21.18306934	6.031700885	16.48839961
14:53:33.768	0.090328805	0.097373472	1.609644104	3.304218813	9.384702002	9.390419382	13.02078218	16.03614791	24.14253876	27.7497477	32.34239266	30.82659874	31.12626557	31.15254314	29.56411972	21.16669686	6.027705841	16.47615859
14:53:34.742	0.090550424	0.096548677	1.610071843	3.304899745	9.385422003	9.392188917	13.02298336	16.03761185	24.14306089	27.74923287	32.33979656	30.8244221	31.1218932	31.14883246	29.55784388	21.16158011	6.027000364	16.47318885
14:53:35.720	0.090292232	0.096430115	1.610737344	3.305898521	9.387315325	9.394368796	13.02576384	16.04071499	24.14837031	27.75522073	32.34663486	30.82756463	31.13041808	31.15660165	29.56572332	21.17019728	6.02999976	16.48060015
14:53:36.695	0.090568943	0.095694567	1.611185313	3.306634247	9.388989984	9.395174074	13.0278708	16.04295891	24.15251975	27.75965996	32.35355934	30.83514672	31.13601809	31.16174285	29.57174902	21.1747528	6.031982093	16.48378499
14:53:37.660	0.09049473	0.096483036	1.611810369	3.307576091	9.390783087	9.397999211	13.03024582	16.0454502	24.15606648	27.76395219	32.35770766	30.83995465	31.1399792	31.16625756	29.57423332	21.17806975	6.033765411	16.48611937
14:53:38.646	0.090162415	0.097384771	1.612369607	3.308723883	9.392761919	9.399859648	13.03201031	16.04882946	24.16149138	27.77021239	32.36731559	30.84846498	31.14813923	31.17483307	29.5832127	21.18613089	6.036891331	16.4920265
14:53:39.616	0.090374684	0.09613865	1.612817584	3.309352211	9.394874106	9.401401207	13.03491006	16.05209021	24.16586534	27.7739004	32.37398996	30.85163127	31.15192285	31.17972819	29.58618796	21.18773779	6.038529236	16.49427635
14:53:40.601	0.090417332	0.097786081	1.613591828	3.310160216	9.396406634	9.403574365	13.03791291	16.05553195	24.17126704	27.78116284	32.3829249	30.86204237	31.16425614	31.19038187	29.59645849	21.19626972	6.042112602	16.50242764
14:53:41.576	0.090189194	0.097554248	1.61423456	3.310911274	9.398308838	9.404959437	13.03985631	16.05804588	24.17509926	27.78503246	32.3859498	30.86526277	31.16668174	31.19209644	29.59743627	21.19587148	6.043215667	16.50234872
14:53:42.551	0.090216818	0.096878773	1.614515575	3.311903469	9.400033695	9.406976447	13.04259223	16.0627092	24.18234998	27.79464195	32.39822462	30.88100128	31.18206173	31.20754905	29.61674796	21.21295074	6.048953451	16.51755193
14:53:43.521	0.090316564	0.096712159	1.614986311	3.312637013	9.402066042	9.408381163	13.04468448	16.06454643	24.18502233	27.79642791	32.39938967	30.8808978	31.18096249	31.20720916	29.61333755	21.20863972	6.048982293	16.51367459
14:53:44.507	0.090601953	0.097462859	1.615502539	3.313512958	9.403462558	9.409244776	13.04738503	16.0662708	24.18684297	27.7976313	32.39858607	30.87861839	31.17887024	31.20565181	29.60708092	21.19913862	6.047134675	16.50495979
14:53:45.473	0.090169473	0.09792781	1.615998577	3.314437236	9.404812227	9.412082835	13.04946758	16.06989809	24.19267879	27.80495251	32.40860571	30.88783085	31.19132161	31.21652335	29.62062049	21.21051184	6.051379309	16.51577343
14:53:46.464	0.090449853	0.09781182	1.616474318	3.315181619	9.40716624	9.413838851	13.05242535	16.07284607	24.19600725	27.80797749	32.41106047	30.88779448	31.19021174	31.21704266	29.61623997	21.20320293	6.049529032	16.50797961
14:53:47.438	0.090756945	0.097492463	1.617390226	3.316351369	9.409319642	9.416435656	13.05592401	16.07873676	24.20662995	27.82224471	32.43040099	30.91119604	31.21368349	31.24188514	29.64968169	21.23211487	6.058115421	16.53140002
14:53:48.409	0.090761197	0.097522354	1.617742067	3.316887601	9.411189363	9.417377761	13.05855105	16.08109549	24.20988221	27.82450873	32.43094553	30.91108657	31.211481	31.24146608	29.64371214	21.22234984	6.056518379	16.52417731
14:53:49.393	0.090747751	0.097679242	1.618301293	3.318182243	9.413481435	9.420130672	13.06041946	16.08304107	24.21249949	27.82715854	32.43244463	30.91233167	31.21316856	31.23936989	29.63752666	21.21360334	6.054558242	16.51543629
14:53:50.355	0.090918616	0.098109009	1.618706273	3.31901665	9.41495529	9.42143128	13.0631411	16.08673269	24.21847463	27.83441159	32.44047209	30.92322898	31.22301083	31.25189292	29.64993984	21.22241422	6.057966631	16.52190011
14:53:51.340	0.090766271	0.096844027	1.619374259	3.319782974	9.416419754	9.423219964	13.06711449	16.09061134	24.22422409	27.84142296	32.45189346	30.93221464	31.23577733	31.26189353	29.6593632	21.22910918	6.061070222	16.52797052
14:53:52.310	0.090676032	0.097924229	1.619915807	3.320424425	9.418738712	9.42587544	13.06971673	16.09336512	24.22842762	27.84671626	32.45543985	30.93710329	31.23799117	31.26415906	29.66029499	21.22609381	6.061171185	16.52420379
14:53:53.283	0.090934374	0.098104286	1.62039664	3.321445096	9.421332462	9.427807702	13.0738889	16.09888416	24.23742601	27.85836383	32.47468741	30.9595063	31.26168428	31.28624831	29.68666909	21.2495012	6.068756601	16.54493732
14:53:54.275	0.091190711	0.098100708	1.621125312	3.322522657	9.422501185	9.429759066	13.07515245	16.10172709	24.24128788	27.86229945	32.47896245	30.96134756	31.26351942	31.28805839	29.68571465	21.24397348	6.067906102	16.53955258
14:53:55.244	0.090866748	0.096885506	1.621507503	3.322973391	9.423927555	9.431417784	13.07850258	16.10549724	24.24775744	27.86977925	32.49598706	30.97245304	31.2743738	31.30062353	29.69925051	21.25509859	6.071538687	16.547293
14:53:56.213	0.090942786	0.097265499	1.622162871	3.323985306	9.425794297	9.433955974	13.08064911	16.10828812	24.25173664	27.87508386	32.49885382	30.97625547	31.27712074	31.30385487	29.70025256	21.25166605	6.071526813	16.54403578
14:53:57.195	0.09108894	0.09847183	1.622448911	3.325332542	9.427696203	9.435008516	13.08231439	16.1107908	24.25461684	27.87708449	32.49729174	30.97599891	31.27626108	31.30478015	29.69556985	21.24496929	6.070773152	16.53828312
14:53:58.181	0.09123142	0.098170495	1.622982824	3.325802907	9.429104435	9.436582133	13.08581699	16.11418621	24.26110077	27.88549612	32.51036819	30.98547662	31.28708481	31.31634063	29.70804263	21.25210542	6.073595201	16.54329226
14:53:59.141	0.091297441	0.098374578	1.623731797	3.32695954	9.431875749	9.439289878	13.08908831	16.11771728	24.26686698	27.89248701	32.5185074	31.00053426	31.29653285	31.32627938	29.71580726	21.25724347	6.075713759	16.54665836
14:54:00.128	0.091629903	0.097270933	1.624586941	3.327706101	9.433768649	9.440283654	13.09315046	16.12191954	24.27322705	27.9007162	32.53157686	31.0077231	31.3100169	31.33724395	29.72783318	21.26848027	6.079018403	16.55404775
14:55:15.788	0.09533929	0.099422577	1.666188967	3.395830623	9.587656825	9.58928753	13.32940623	16.41457619	24.73011421	28.45316502	33.21634335	31.69859112	32.04645058	32.07148358	30.39276312	21.65865694	6.242386694	16.82996669
14:55:16.772	0.095245319	0.102027763	1.6670737	3.397759541	9.587978927	9.594145617	13.32978573	16.41808533	24.73454935	28.45640272	33.22289676	31.71190034	32.04809859	32.07248805	30.3899804	21.65581661	6.242331878	16.83048666
14:55:17.744	0.095618418	0.103013123	1.66760439	3.398693445	9.591433611	9.596782957	13.33390914	16.42289849	24.74311447	28.46563027	33.23603381	31.72569991	32.06140084	32.0875483	30.40579588	21.66958317	6.246807411	16.84142641
14:55:18.729	0.095325468	0.10187677	1.668251378	3.40002617	9.592869691	9.598970508	13.3360957	16.42544553	24.74660612	28.46939141	33.2388148	31.72734674	32.06363815	32.08971954	30.40655309	21.66930358	6.247156024	16.8399671
14:55:19.700	0.095189767	0.1022547	1.668592384	3.401071856	9.59432978	9.600292161	13.33801588	16.42801764	24.75048551	28.47406529	33.24585198	31.73282919	32.06837839	32.09565498	30.41153618	21.67226876	6.248976133	16.84355526
14:55:20.680	0.095224333	0.102800779	1.669130631	3.401990353	9.596498804	9.602518906	13.34199997	16.43290912	24.75872509	28.48414525	33.2620798	31.7502751	32.08701136	32.11514528	30.43262294	21.69202254	6.255455689	16.86092214
14:55:21.659	0.095104323	0.101649858	1.669666351	3.402634878	9.598245288	9.604680534	13.3437908	16.4350213	24.76087948	28.48667764	33.25902581	31.75008497	32.08448043	32.11067392	30.42285506	21.67859394	6.252163975	16.84593029
14:55:22.630	0.095824963	0.102313476	1.670508113	3.403917267	9.60047954	9.60624315	13.34893401	16.43981068	24.76889548	28.49640585	33.27429242	31.76143648	32.09754924	32.12557628	30.43834128	21.68958489	6.256137772	16.85482179
14:55:23.616	0.096004086	0.102430581	1.671177849	3.404649412	9.602923174	9.608235219	13.35073417	16.44368886	24.77405705	28.50234092	33.28300771	31.768354	32.102719	32.13076572	30.43759714	21.68397432	6.255239242	16.84838824
14:55:24.575	0.095388638	0.102952637	1.671152166	3.405469403	9.605559593	9.611797701	13.35518502	16.44994245	24.78456366	28.51558833	33.30454752	31.78725549	32.12635458	32.15323562	30.46457549	21.70243868	6.260917661	16.86387822
14:55:25.555	0.095892936	0.102778049	1.672350494	3.406747336	9.607155305	9.613574973	13.35910456	16.45429533	24.79252465	28.52434731	33.31815003	31.7976405	32.1361557	32.16510415	30.47405521	21.7043504	6.261789046	16.86468727
14:55:26.528	0.095886771	0.102685825	1.672686425	3.40766805	9.609882921	9.616270785	13.36268295	16.46034648	24.80060213	28.53664758	33.3359015	31.81198065	32.15303549	32.18294514	30.48867175	21.71369826	6.264789402	16.87142008
14:55:27.519	0.09583787	0.102892147	1.673308084	3.408715765	9.61246229	9.618060759	13.3665224	16.46561604	24.80901056	28.54747659	33.34638241	31.82518056	32.1704837	32.19727867	30.50053781	21.71837477	6.266536669	16.87453351
14:55:28.490	0.096022001	0.102759603	1.673965209	3.409588266	9.614489626	9.62055469	13.37117024	16.47063455	24.81717315	28.557762	33.3572761	31.83305925	32.18158012	32.20993485	30.50706641	21.72001257	6.266960759	16.87318829
14:55:29.475	0.096221487	0.10252153	1.674516068	3.410449713	9.61773693	9.623829798	13.37550017	16.47671965	24.82678816	28.56970727	33.37152975	31.85417809	32.19851228	32.22750179	30.52519368	21.72993952	6.269825746	16.87928471
14:55:30.447	0.095989638	0.102537405	1.675228825	3.411510693	9.619450999	9.625581179	13.3795884	16.48130424	24.83397633	28.57951422	33.38395935	31.86672917	32.21153223	32.23822689	30.53310453	21.73052245	6.270459915	16.87809025
14:55:31.416	0.096130702	0.10274974	1.675845485	3.412576072	9.621965902	9.627534538	13.38358274	16.48770475	24.84351521	28.59038017	33.39780711	31.88158416	32.23082745	32.25474338	30.5516828	21.74303582	6.274698481	16.88788699
14:55:32.399	0.095804039	0.102993809	1.676505093	3.413450671	9.624560194	9.630308147	13.38922957	16.49240449	24.85192403	28.60286041	33.4167819	31.90175583	32.25061466	32.27207434	30.57070041	21.75394825	6.278837666	16.89631881
14:55:33.369	0.096097671	0.102916172	1.677015525	3.414529187	9.626162	9.632398229	13.39205043	16.49677482	24.85875655	28.61078908	33.42823553	31.91223051	32.26094974	32.28226069	30.58086162	21.75829359	6.280726991	16.89905358
14:55:34.345	0.096475766	0.1038028	1.677371665	3.415278896	9.628425515	9.634168996	13.39494509	16.5008171	24.86677924	28.61987789	33.44118459	31.92355046	32.27589165	32.29642871	30.59078575	21.76617756	6.284168008	16.90651182
14:55:35.330	0.096295329	0.103562155	1.678054023	3.416644423	9.63057649	9.637046717	13.39753212	16.50463059	24.87106668	28.62668864	33.44806539	31.9267124	32.28470101	32.304388	30.59468158	21.76798951	6.28561805	16.90668641
14:55:36.297	0.0965716	0.103298358	1.678675736	3.417416103	9.632329043	9.638980533	13.40053628	16.50835988	24.87737356	28.63260269	33.4532486	31.93569811	32.29180873	32.31346376	30.60374156	21.77501786	6.288609651	16.91168833
14:55:37.273	0.096593811	0.103691694	1.679148206	3.418369634	9.63448024	9.641500258	13.4038467	16.5128846	24.88330854	28.64015453	33.46369827	31.94718367	32.30408092	32.32528578	30.6184704	21.7884004	6.293747098	16.92307446
14:55:38.260	0.096751562	0.102687544	1.679742035	3.419272679	9.636146541	9.641675003	13.40570576	16.51403848	24.8857401	28.64240017	33.46438696	31.94605959	32.30442701	32.32531039	30.61709079	21.78770667	6.295050153	16.92280853
14:55:39.239	0.096735713	0.102689688	1.680148738	3.419862356	9.638383322	9.644409551	13.4076842	16.51625116	24.88886816	28.64429409	33.46555201	31.94724086	32.30394793	32.324956	30.61862101	21.78849167	6.296479335	16.92409733
14:55:40.208	0.096608027	0.103212562	1.681073919	3.420658119	9.639494594	9.645529155	13.40866334	16.51749128	24.89101509	28.64584796	33.46520916	31.94564562	32.30475983	32.32624308	30.61790495	21.79147997	6.298355502	16.92687277
14:55:41.179	0.096462648	0.103810923	1.681533752	3.421517426	9.64023646	9.64672034	13.4094839	16.51865694	24.89150727	28.64361102	33.4615032	31.94083881	32.3022091	32.31881071	30.60755441	21.78357637	6.297475165	16.92209311
14:55:42.153	0.096400062	0.102594904	1.6820568	3.422442462	9.641805572	9.648308722	13.41256166	16.52029302	24.89370789	28.64491373	33.46333521	31.94156196	32.30171606	32.32051141	30.61128999	21.78961314	6.299866684	16.92718805
14:55:43.138	0.096458327	0.103739711	1.682415427	3.422970721	9.644098291	9.650007511	13.41301484	16.52079237	24.89347987	28.64338049	33.45779347	31.93576598	32.29295447	32.31268208	30.60062948	21.78046518	6.298284093	16.92130525
14:55:44.108	0.097133537	0.103659501	1.682829737	3.424042621	9.644940627	9.651921627	13.41395921	16.5221825	24.89636891	28.64543503	33.46190103	31.93713245	32.2932696	32.3144514	30.60242124	21.78487023	6.300028344	16.92380551
14:55:45.098	0.096890672	0.104327327	1.683322382	3.424855763	9.646355632	9.653457437	13.41534764	16.52448499	24.89782595	28.64672398	33.45929899	31.93656684	32.29171668	32.31469958	30.60284552	21.78594571	6.301311692	16.9259833
14:55:46.067	0.096667509	0.103729835	1.683860612	3.425831227	9.648119859	9.654251357	13.41824745	16.52657876	24.9001661	28.64967786	33.4633078	31.93955562	32.29639219	32.3163233	30.60482511	21.78853756	6.302684373	16.9282777
14:55:47.041	0.097049935	0.103874379	1.684456992	3.426659811	9.650161683	9.655579184	13.4202261	16.52724458	24.90186411	28.64985363	33.46334637	31.93639248	32.29558891	32.31445584	30.60174007	21.78851925	6.30328148	16.92907343
14:55:48.017	0.097251417	0.103308631	1.684919327	3.427326194	9.651618409	9.658255093	13.42129373	16.52957378	24.90473713	28.652704	33.46354277	31.94076327	32.29681246	32.31627928	30.60465433	21.79231213	6.305313615	16.93275248
14:55:48.992	0.096827281	0.104588948	1.685619387	3.428051756	9.653382443	9.659517746	13.42272279	16.53105945	24.90662059	28.65358531	33.46210425	31.93791544	32.29391942	32.31469206	30.60119397	21.78923068	6.305209908	16.93026556
14:55:49.975	0.097049126	0.104612528	1.686266312	3.429007389	9.655506722	9.661893849	13.42657192	16.53599628	24.91495912	28.66406081	33.47679105	31.952747	32.31558533	32.33275999	30.62655799	21.81055866	6.312767616	16.95073741
14:55:50.945	0.097025266	0.103504639	1.686566806	3.430177889	9.657211778	9.663547387	13.42958538	16.53952562	24.91989685	28.66947297	33.48356196	31.95979854	32.32183752	32.33976875	30.63050544	21.81349742	6.314513535	16.95253644
14:55:51.924	0.097218067	0.104024906	1.687385709	3.430888073	9.659865032	9.666425054	13.43194967	16.5427587	24.92392924	28.67445122	33.48564984	31.96202029	32.3214411	32.34096262	30.62814479	21.80666863	6.313706507	16.94551633
14:55:52.907	0.097197544	0.103864915	1.687825253	3.431962045	9.661661307	9.667706988	13.43626897	16.5484394	24.93283975	28.68582565	33.4969474	31.97481413	32.33772753	32.35620239	30.64298469	21.81586461	6.317242718	16.95193885
14:55:53.889	0.097042817	0.104034327	1.68852528	3.433139028	9.664595145	9.670330551	13.44163772	16.55395311	24.94229149	28.69839524	33.51478531	31.99282263	32.35643433	32.3748081	30.65969948	21.82548473	6.32085747	16.95878715
14:55:54.850	0.097407213	0.103401692	1.689020525	3.434107938	9.66691497	9.673410564	13.44659709	16.56068542	24.95297418	28.71290274	33.53358988	32.01480013	32.37685383	32.39664013	30.67925795	21.83664103	6.324705827	16.96523008
14:55:55.828	0.097546598	0.103782128	1.689753436	3.435241107	9.670165033	9.676503117	13.45249569	16.56847368	24.96672471	28.73136856	33.56024296	32.04390241	32.40748171	32.42603951	30.70942525	21.85785622	6.331299186	16.97908214
14:55:56.813	0.097460307	0.104315247	1.690352289	3.436308474	9.673007147	9.679777812	13.45738885	16.57572796	24.9785495	28.7464641	33.58131668	32.06460486	32.42819299	32.44658401	30.72744969	21.86261651	6.3336522	16.98158955
14:55:57.779	0.097838721	0.10471541	1.690872802	3.437373772	9.67579658	9.681730957	13.46289715	16.5830061	24.99002787	28.76165333	33.60432576	32.0905045	32.45053356	32.47128529	30.75014479	21.87497588	6.33814917	16.99077623
14:55:58.769	0.097689001	0.104998042	1.691481752	3.438541914	9.678124423	9.684106745	13.46797794	16.5896793	25.00246286	28.77729415	33.62502215	32.11405557	32.47374035	32.49288198	30.76994724	21.88794793	6.341577678	16.99792261
14:55:59.738	0.097784987	0.103993129	1.692427111	3.439493219	9.681017157	9.687166919	13.47266915	16.59604929	25.01166013	28.7895006	33.63674321	32.12630878	32.49046301	32.51043485	30.7823525	21.89219296	6.343615887	16.99943245
14:57:15.221	0.102144129	0.10862685	1.737248408	3.51383653	9.845857701	9.850401219	13.72271605	16.90484608	25.47554123	29.33882105	34.30744774	32.78085124	33.1648354	33.18488003	31.37170259	22.23101689	6.500236062	17.24842383
14:57:16.194	0.101979229	0.109441248	1.737458288	3.514706531	9.847830756	9.853442083	13.72514713	16.90811796	25.48074204	29.3451512	34.3130293	32.79349182	33.18023566	33.19569112	31.38211908	22.24107394	6.503800578	17.2549793
14:57:17.174	0.101607687	0.110051475	1.738305443	3.515543658	9.849913122	9.854353422	13.72701396	16.90970287	25.48184575	29.34348138	34.3106422	32.78442704	33.17030363	33.18575741	31.36759742	22.22729941	6.501256214	17.24273372
14:57:18.149	0.101407401	0.109497548	1.738930057	3.516641584	9.851945266	9.857765486	13.72910351	16.91280605	25.48656713	29.34810448	34.31110291	32.79011833	33.17688073	33.19149989	31.37419666	22.23476879	6.504254339	17.24917878
14:57:19.126	0.101792988	0.109671968	1.739595133	3.517895112	9.854423536	9.859744844	13.73272252	16.9173094	25.49395482	29.35814367	34.32856529	32.80508685	33.19405756	33.20895861	31.39772282	22.25859451	6.51168308	17.271295
14:57:20.090	0.102188923	0.108995355	1.740050314	3.518767305	9.856396595	9.861672108	13.73609403	16.91950163	25.49733997	29.36114054	34.33045134	32.80896019	33.1951896	33.21203498	31.40036856	22.26061963	6.512805858	17.27330024
14:57:21.077	0.102322468	0.108216656	1.740735621	3.519569366	9.857820105	9.862889522	13.73640667	16.9204455	25.49789423	29.35989107	34.32523586	32.79764792	33.18755597	33.20329945	31.38525962	22.24583905	6.508980324	17.26024417
14:57:22.046	0.102314134	0.109198354	1.74108206	3.520191718	9.85944453	9.865663382	13.7394614	16.92398729	25.50260056	29.3652656	34.33035001	32.80452971	33.19305402	33.20764158	31.38834857	22.24764962	6.51010472	17.26169963
14:57:23.031	0.10222468	0.110003333	1.742040484	3.521583315	9.862197563	9.867877178	13.74367438	16.92921602	25.51096124	29.37514459	34.34280221	32.81509791	33.20508601	33.22244054	31.40173339	22.25520359	6.513315572	17.2685522
14:57:24.009	0.102249396	0.109624411	1.742510838	3.522313054	9.864108569	9.87001283	13.74626386	16.93223485	25.5148397	29.3786749	34.34514686	32.81686029	33.20325845	33.21955987	31.39311307	22.24265319	6.510086813	17.25445754
14:57:24.992	0.10229581	0.10920774	1.743390867	3.523408787	9.867139324	9.873717943	13.75392675	16.94041575	25.52698763	29.39597279	34.37187258	32.84150798	33.2298338	33.24948372	31.42440818	22.26768173	6.518391791	17.27603501
14:57:25.963	0.102367596	0.109620658	1.744048357	3.524774086	9.869670777	9.875443322	13.75889207	16.94738205	25.5394998	29.41137144	34.39331528	32.86619115	33.25465963	33.27467868	31.4552853	22.28802495	6.525837091	17.29278949
14:57:26.933	0.102252103	0.109393579	1.744442844	3.525977207	9.873434253	9.878998656	13.76226359	16.95358923	25.54899771	29.42380031	34.40928193	32.88788139	33.27263767	33.29321383	31.47052344	22.29700796	6.52924194	17.2981786
14:57:27.919	0.102768218	0.109977229	1.745191373	3.526871315	9.875197529	9.881622726	13.7660311	16.957519	25.55462973	29.43103909	34.41890626	32.89297731	33.27720581	33.29814526	31.47135805	22.29304331	6.528587825	17.29396637
14:57:28.895	0.102782919	0.109887417	1.745879209	3.527993347	9.877850112	9.884539853	13.77054105	16.96345626	25.56483032	29.44329661	34.43204457	32.913233	33.29452053	33.31589374	31.48748326	22.30356057	6.532589678	17.30077923
14:57:29.874	0.10255626	0.109964899	1.746640381	3.529393711	9.881489493	9.885555388	13.77555587	16.9704563	25.57663043	29.45820494	34.45257569	32.93433968	33.3180255	33.3380361	31.50840624	22.32015435	6.538040972	17.31260839
14:57:30.834	0.102789286	0.110601738	1.747328217	3.530506978	9.883326645	9.889957324	13.78109039	16.97630922	25.58500831	29.46964451	34.46613836	32.95014514	33.33406184	33.35474525	31.52331883	22.32830043	6.540666416	17.3177256
14:57:31.821	0.102909812	0.109140976	1.747874437	3.531050432	9.885866951	9.890829585	13.78297208	16.98030647	25.59089508	29.47647335	34.4730076	32.9561752	33.34154388	33.3614024	31.52462071	22.32165518	6.5393359	17.31092215
14:57:32.796	0.10292251	0.110724107	1.748524339	3.532271085	9.887851818	9.894261182	13.78849671	16.98681729	25.60152058	29.4903919	34.48922282	32.97488678	33.36399991	33.38120181	31.54664426	22.33784869	6.544467193	17.32345084
14:57:33.774	0.10303736	0.110182171	1.749184358	3.533450099	9.890980072	9.896637787	13.79278393	16.99182671	25.60975758	29.49948573	34.49926962	32.98476871	33.37472915	33.39467717	31.55822569	22.34447956	6.546933725	17.3280551
14:57:34.749	0.102909181	0.108971051	1.749616778	3.534775948	9.894211734	9.899502814	13.79658608	16.99788205	25.61879856	29.51164051	34.51782376	33.00017187	33.39120036	33.41319801	31.57905455	22.36198814	6.553147826	17.34099431
14:57:35.720	0.103374221	0.110082332	1.750332431	3.53549473	9.895989789	9.901664515	13.79965073	17.00085027	25.62297854	29.51668421	34.52375984	33.00146977	33.39282537	33.41705569	31.57905035	22.36012223	6.553756066	17.33922627
14:57:36.703	0.102649819	0.110372583	1.751045556	3.53639322	9.897906697	9.903370351	13.80219072	17.00483065	25.6283167	29.52239812	34.53090609	33.01002816	33.40071077	33.42530506	31.5861583	22.36899966	6.557156516	17.34574755
14:57:37.678	0.103136557	0.110723747	1.751806728	3.537565659	9.900021561	9.905727419	13.80642844	17.00823748	25.6327513	29.52761207	34.53909483	33.01672955	33.40596244	33.4305854	31.59333905	22.37508813	6.560169825	17.35153081
14:57:38.648	0.103084492	0.110607337	1.752150639	3.538762205	9.902287107	9.907563505	13.80831506	17.01135752	25.6375882	29.53286058	34.54292233	33.0224805	33.41288437	33.43619198	31.60134066	22.38254461	6.563444244	17.35931654
14:57:39.633	0.103310508	0.110476347	1.752787897	3.53961248	9.903763795	9.909126069	13.8093751	17.01277373	25.6384049	29.53207735	34.54006556	33.01581521	33.4076743	33.42910446	31.59049354	22.3746907	6.562306608	17.35265096
14:57:40.611	0.103152952	0.110828372	1.753544012	3.540226065	9.905113443	9.910897029	13.81174185	17.01439238	25.64174171	29.53454885	34.54132176	33.02059632	33.40975222	33.43131226	31.59350642	22.3772387	6.564836183	17.35703489
14:57:41.581	0.103191021	0.110884408	1.753829758	3.540837459	9.906604912	9.912524721	13.81337109	17.01471208	25.64132317	29.53143449	34.53445501	33.00635622	33.39697021	33.41925106	31.57522115	22.36210916	6.56107428	17.34297277
14:57:42.557	0.103507172	0.11004647	1.754497363	3.542226864	9.908808409	9.91378121	13.81666343	17.01865873	25.64745009	29.53852561	34.54556232	33.01858868	33.40686706	33.43180654	31.58951711	22.3759899	6.566924907	17.35648536
14:57:43.527	0.103652735	0.11035045	1.755000592	3.543250275	9.91065737	9.915754054	13.81819367	17.02096903	25.64926505	29.54147567	34.54687924	33.01970961	33.40794436	33.43309696	31.59049623	22.37801569	6.568675237	17.35924042
14:57:44.520	0.103602006	0.111364817	1.755387492	3.543990971	9.91191542	9.918814441	13.81972394	17.02348175	25.65273182	29.54448053	34.5500105	33.02127908	33.41154305	33.43623148	31.59418265	22.38138743	6.570675334	17.36193375
14:57:45.486	0.103645082	0.110507996	1.756163838	3.544874121	9.914869362	9.919641123	13.82215008	17.02612945	25.6563169	29.54695305	34.54973358	33.02214641	33.41050779	33.43690626	31.59155847	22.37931278	6.571614321	17.36082498
14:57:46.474	0.103524581	0.110886626	1.756796039	3.545711246	9.916003327	9.92150325	13.82376448	17.02754566	25.65755058	29.54674978	34.54901116	33.01827962	33.40571066	33.42970627	31.58078145	22.3691443	6.569365939	17.35178833
14:57:47.436	0.103670478	0.110623503	1.75765078	3.546701784	9.917790247	9.92397103	13.8256115	17.02902936	25.65971396	29.54896095	34.55096205	33.01712338	33.40606124	33.43060624	31.58127183	22.36880004	6.57051512	17.35211993
14:57:48.428	0.103870122	0.111140266	1.757668466	3.547742726	9.919766238	9.925514053	13.82808221	17.03233495	25.66340486	29.55311499	34.554805	33.02205052	33.40769136	33.4339203	31.58470107	22.37178929	6.572720719	17.35566317
14:57:49.388	0.103502586	0.111741961	1.75856114	3.548443975	9.921470434	9.926672863	13.83005792	17.03410544	25.66610936	29.55540596	34.55777091	33.02289701	33.4123467	33.43654703	31.5873688	22.37529359	6.574836307	17.35922948
14:57:50.372	0.103791029	0.110506777	1.758975858	3.549458619	9.923080073	9.929466249	13.83364725	17.03709051	25.67017961	29.5601068	34.56609567	33.02898735	33.41873247	33.44174616	31.59477953	22.38313951	6.578314004	17.36732456
14:57:51.347	0.103879507	0.111505713	1.759276778	3.550201507	9.925162434	9.930234316	13.83565762	17.03953577	25.67393378	29.5637048	34.56828123	33.03295561	33.42291391	33.44417861	31.59807391	22.38608594	6.579802798	17.36924167
14:57:52.332	0.103509633	0.110950029	1.760085998	3.551165744	9.926370261	9.931731755	13.83725717	17.04076641	25.67444119	29.56206818	34.56503579	33.02660055	33.41809694	33.43891885	31.59153479	22.38392397	6.580017026	17.36852468
14:57:53.299	0.103918256	0.111671846	1.76067268	3.552211071	9.928517625	9.933873918	13.8382677	17.04253689	25.67683587	29.56436984	34.56320368	33.02981277	33.42054408	33.44270956	31.59689146	22.39113636	6.582989814	17.37674757
14:57:54.279	0.104667388	0.111333224	1.76150466	3.552894786	9.930319307	9.934707105	13.8383378	17.04278911	25.67539623	29.56042404	34.55807485	33.02104737	33.40936772	33.43068061	31.58291164	22.3818004	6.581072903	17.36985189
14:57:55.265	0.104250111	0.111587458	1.761646261	3.553808617	9.931240548	9.936341302	13.83926915	17.04358114	25.6755635	29.5582071	34.55196326	33.01229736	33.4009958	33.4238403	31.57302577	22.37663978	6.580000855	17.36546228
14:57:56.225	0.103837172	0.111559414	1.762308808	3.554829837	9.932932924	9.938131803	13.84167549	17.04503111	25.6771396	29.55837042	34.55054103	33.00998568	33.39687742	33.42129951	31.56930419	22.3749021	6.580332059	17.36387585
14:57:57.206	0.10422009	0.110644231	1.762698238	3.555752434	9.934941419	9.93998742	13.84357697	17.0465654	25.67907704	29.56003366	34.54835727	33.00831103	33.39569411	33.42101793	31.56784565	22.3726835	6.581330626	17.36540737
14:57:58.179	0.104427079	0.110862427	1.763408833	3.556453682	9.936819921	9.941296006	13.84570614	17.04955049	25.68261488	29.56396171	34.55403515	33.01172659	33.40109537	33.42611865	31.57245133	22.37868962	6.584116098	17.37050377
14:57:59.170	0.10415869	0.11191973	1.763881715	3.557220676	9.938264102	9.942252922	13.847375	17.05120286	25.68405681	29.56367848	34.54884518	33.00737282	33.39624119	33.41941187	31.56607474	22.37255697	6.583079571	17.36468796
14:58:00.135	0.104225135	0.111424089	1.764488627	3.558024929	9.939912158	9.944662089	13.84972194	17.05322638	25.68765714	29.56742519	34.55882018	33.01408095	33.4014996	33.42416698	31.57028523	22.37871512	6.586031015	17.37206105
14:59:16.032	0.108440835	0.119522819	1.811918555	3.636804777	10.11103556	10.11744723	14.09389265	17.34887015	26.11460327	30.05190724	35.11264903	33.54557452	33.96541302	33.97318237	32.03405878	22.66213876	6.731964481	17.58457886
14:59:17.004	0.109237234	0.116241237	1.81341832	3.638737955	10.11526151	10.12052287	14.10107432	17.35643307	26.13204366	30.07554168	35.1381657	33.58927362	33.99883403	34.01366194	32.07692997	22.69415155	6.74084566	17.60860198
14:59:17.982	0.109378634	0.117111071	1.814579219	3.640546213	10.12070175	10.12541545	14.11155255	17.36912437	26.15272037	30.10276966	35.17643068	33.63227968	34.03492795	34.05388169	32.11418621	22.7126963	6.746881881	17.62148416
14:59:18.963	0.109325405	0.116438929	1.815133191	3.641736446	10.12359524	10.12901209	14.11663559	17.37764891	26.16669062	30.12048806	35.20319603	33.65334415	34.05771315	34.07829335	32.13605472	22.71987064	6.749819659	17.62460887
14:59:19.936	0.10910258	0.11656738	1.816079135	3.642974893	10.12728644	10.13225706	14.12507451	17.38806281	26.18331155	30.1432802	35.23374949	33.68056276	34.09496926	34.11185909	32.16692786	22.7387174	6.755746052	17.63654773
14:59:20.911	0.108929498	0.116410948	1.816309411	3.644640699	10.13093036	10.13629002	14.1325829	17.39834177	26.20042657	30.16642457	35.26874742	33.71653661	34.13029819	34.1487957	32.2012602	22.75571249	6.760994928	17.6467342
14:59:21.885	0.109385047	0.116506791	1.817488012	3.645951468	10.13601016	10.14040112	14.14122478	17.4109656	26.22110311	30.19556318	35.3086382	33.76310699	34.17878941	34.19505227	32.24964478	22.78726534	6.770970863	17.67246399
14:59:22.866	0.109627939	0.117529351	1.818307515	3.647354285	10.1389982	10.1445448	14.14851542	17.42144704	26.23773048	30.21736439	35.33928756	33.79109071	34.2043923	34.22752769	32.27936718	22.79868832	6.774834883	17.67763998
14:59:23.842	0.109728612	0.116919856	1.819407722	3.648873256	10.14259781	10.14790049	14.15547936	17.43003906	26.25257363	30.23707312	35.36280559	33.81645511	34.23213388	34.25406683	32.30093055	22.80761677	6.777410716	17.68017666
14:59:24.828	0.109343204	0.117351199	1.820341025	3.650148962	10.14716355	10.15142551	14.16225525	17.44075672	26.26873666	30.25896449	35.39264977	33.84280068	34.26470569	34.28537499	32.32735323	22.81884761	6.781062403	17.68615806
14:59:25.793	0.109747343	0.11798505	1.820626935	3.65134796	10.15040861	10.15568639	14.16897166	17.45078261	26.28484776	30.28015277	35.41841518	33.87036701	34.28917034	34.31515355	32.34973787	22.83129507	6.784358615	17.690969
14:59:26.774	0.10952118	0.117346383	1.8217322	3.652794609	10.15388414	10.15930258	14.17667315	17.45983016	26.29992177	30.30191926	35.44797659	33.9055351	34.32607998	34.34917293	32.38354956	22.84977625	6.790585573	17.70420267
14:59:27.741	0.109483971	0.11713418	1.822045928	3.654072504	10.15758124	10.16340717	14.18491409	17.47017659	26.31652683	30.32360749	35.47972038	33.93871615	34.36422678	34.38298266	32.42124666	22.87294674	6.797937306	17.72072362
14:59:28.722	0.109848387	0.116955439	1.822873019	3.65527808	10.16149108	10.16592278	14.19062579	17.47779024	26.33010957	30.34107427	35.50005513	33.96454175	34.3840595	34.40825255	32.44046756	22.88349174	6.80197617	17.72857975
14:59:29.709	0.110005818	0.117658782	1.823604013	3.656683091	10.16368141	10.1702293	14.19546142	17.48461105	26.34079452	30.35483234	35.51987469	33.97984673	34.40385939	34.42802051	32.46069125	22.89419388	6.805485342	17.73434063
14:59:30.679	0.109887819	0.117732312	1.824357765	3.657822918	10.16663103	10.17277745	14.1995644	17.49036899	26.34859192	30.36412218	35.52883215	33.99144115	34.41368241	34.43826022	32.46670565	22.89476964	6.806556812	17.73379979
14:59:31.655	0.109639619	0.117534694	1.824921853	3.658899189	10.16826592	10.17343705	14.20333579	17.49393391	26.35463495	30.37080666	35.53429808	33.99860098	34.41805116	34.44259506	32.47012266	22.89333628	6.806626903	17.73165655
14:59:32.625	0.110210356	0.116909769	1.825430305	3.659839582	10.17163212	10.17637595	14.20724574	17.49947254	26.36253267	30.3811314	35.5498141	34.01041621	34.43597529	34.45685577	32.48387537	22.90242116	6.810738485	17.73851666
14:59:33.606	0.110238921	0.117778711	1.82627004	3.660753678	10.17446653	10.17970561	14.21174971	17.50568603	26.37070724	30.39165961	35.56273964	34.02368784	34.44973465	34.47190865	32.50162169	22.91386093	6.815159771	17.74773981
14:59:34.577	0.110151636	0.116925546	1.826897349	3.662222242	10.17617232	10.18247519	14.21552603	17.50855928	26.37476525	30.39583085	35.56680374	34.02666434	34.45180149	34.47589722	32.49977977	22.90989308	6.814724638	17.74350499
14:59:35.561	0.110247639	0.117090885	1.827486727	3.663320432	10.17893287	10.1841898	14.2183669	17.51256286	26.38076086	30.40252563	35.57528351	34.0346951	34.45978722	34.48550523	32.50812629	22.9144424	6.816746393	17.74730982
14:59:36.534	0.110404402	0.117935797	1.828318875	3.664376979	10.18159887	10.18615837	14.22211354	17.51727492	26.38661083	30.40968789	35.58381165	34.04229176	34.46734712	34.49574325	32.51720129	22.9209845	6.819490639	17.75197964
14:59:37.517	0.11052411	0.117801675	1.828900667	3.665334908	10.18397534	10.18948152	14.22568698	17.52259434	26.39652311	30.42187619	35.603387	34.06433395	34.48861262	34.51542082	32.53901355	22.94274578	6.826181209	17.76869735
14:59:38.488	0.110623784	0.118804463	1.829639246	3.666597464	10.18702542	10.19195805	14.22952765	17.52705334	26.40356287	30.4294025	35.61015714	34.07208001	34.49726731	34.52223155	32.54526002	22.94366716	6.828036956	17.77075465
14:59:39.467	0.110726131	0.118489294	1.83005919	3.667862213	10.18905325	10.19404386	14.23181909	17.53017969	26.4077743	30.43422097	35.61395572	34.0722132	34.50121103	34.52588146	32.54278369	22.93817804	6.826987344	17.76464343
14:59:40.453	0.110493956	0.11778715	1.831055717	3.669302291	10.19125837	10.19712607	14.23666464	17.53548226	26.41594791	30.44473682	35.62838059	34.09269536	34.51716738	34.54316063	32.56064315	22.95011808	6.831692955	17.77436963
14:59:41.423	0.110588956	0.117491723	1.831660267	3.669810943	10.19394505	10.19876902	14.23986184	17.53909778	26.42155847	30.44985188	35.63146981	34.09781597	34.52355535	34.54469582	32.5582868	22.94459915	6.830506778	17.76853485
14:59:42.387	0.110427553	0.118389824	1.83207515	3.670672438	10.19657854	10.20212471	14.2436233	17.54497381	26.43074634	30.4610979	35.64861206	34.11394221	34.54252189	34.56347007	32.58052502	22.95998019	6.835667208	17.78049682
14:59:43.373	0.111072422	0.117600165	1.832897186	3.671829802	10.19845571	10.20315553	14.24713242	17.54740855	26.43375173	30.46472121	35.64905721	34.11764382	34.54254981	34.56270477	32.57622254	22.95170011	6.834259317	17.77369984
14:59:44.343	0.110911354	0.118750521	1.833387937	3.673230428	10.20065785	10.20482454	14.24927533	17.55109156	26.43807208	30.46956319	35.6569267	34.12178036	34.54812172	34.56835028	32.57973355	22.95425382	6.835825091	17.77545625
14:59:45.328	0.111107185	0.118413047	1.833737073	3.674157676	10.20271228	10.20756811	14.25242312	17.55448787	26.44305511	30.47504042	35.66430559	34.12821792	34.55391165	34.57491014	32.58955066	22.96541118	6.840187651	17.78567413
14:59:46.312	0.110823258	0.11892502	1.834432665	3.675104647	10.20387151	10.20886594	14.25275943	17.55445963	26.44139479	30.47091859	35.65447259	34.11728478	34.54099672	34.56329237	32.57255589	22.95373363	6.837441057	17.77589647
14:59:47.276	0.110702585	0.118403935	1.835183889	3.675885055	10.20609728	10.2094083	14.25324909	17.55559528	26.44175286	30.47007449	35.64932562	34.111071	34.53739575	34.55880331	32.56814465	22.95276433	6.839176562	17.77810591
14:59:48.261	0.110992232	0.118594147	1.835768211	3.676748746	10.20739242	10.21185882	14.25456546	17.55576948	26.44130524	30.46804529	35.64414124	34.10498485	34.53268969	34.55383834	32.56358577	22.95486243	6.841142443	17.78080123
14:59:49.233	0.11116636	0.118086792	1.836342415	3.677450258	10.20840981	10.21413999	14.25416915	17.55312636	26.43725157	30.45956888	35.62971519	34.08825195	34.51075901	34.53576184	32.54418848	22.94156508	6.838621436	17.77175263
14:59:50.213	0.110991938	0.11866483	1.837184681	3.678114515	10.20917018	10.21526198	14.25402037	17.55291253	26.43435577	30.4540032	35.62105552	34.0769335	34.50050978	34.52388818	32.53369454	22.9392875	6.839056499	17.77107155
14:59:51.182	0.111461201	0.119274615	1.837508527	3.67897382	10.20986258	10.21620161	14.25407942	17.55254681	26.43206373	30.44958745	35.61305676	34.06218581	34.4900622	34.51490713	32.52477083	22.93583963	6.839363703	17.76990151
14:59:52.167	0.111309483	0.118930281	1.83771099	3.679675335	10.21114885	10.21680263	14.2552572	17.55186065	26.43039565	30.44643241	35.60716162	34.05320977	34.47808249	34.50692995	32.5184128	22.93438285	6.840246587	17.77088736
14:59:53.136	0.111449559	0.119315263	1.838596245	3.680359314	10.21264192	10.2171887	14.25491533	17.55147806	26.42840491	30.44120923	35.59886674	34.04650914	34.46973125	34.49652682	32.50752603	22.93018873	6.840312659	17.76934813
14:59:54.115	0.11153722	0.118693794	1.839350001	3.681273412	10.2136741	10.21844094	14.25575155	17.55080874	26.42721645	30.43821411	35.5949154	34.03803216	34.46057217	34.48734194	32.49955766	22.92323602	6.83951266	17.76550852
14:59:55.084	0.111308041	0.119098509	1.839871099	3.682126143	10.21585852	10.22061791	14.2569342	17.55206251	26.42734228	30.43641427	35.58926755	34.03218281	34.45541678	34.4824828	32.49170988	22.92206317	6.839534328	17.76530955
14:59:56.069	0.11153192	0.119173744	1.840288517	3.683127905	10.21669275	10.22285353	14.25900295	17.55345133	26.4285787	30.4368418	35.5871915	34.02917026	34.4552804	34.47961298	32.48747944	22.9187774	6.839533145	17.76371093
14:59:57.047	0.111506735	0.119290164	1.840812145	3.684031045	10.21938535	10.2239104	14.26069548	17.55559925	26.43253492	30.44004509	35.58734901	34.02821528	34.45661714	34.48067596	32.48797293	22.92063265	6.84058589	17.76460322
14:59:58.025	0.111765336	0.119210959	1.841735336	3.685313329	10.22113547	10.2266735	14.26387295	17.55906302	26.43701638	30.44434015	35.59184543	34.03384775	34.45753054	34.48307163	32.49094393	22.92154414	6.841439813	17.76598774
14:59:59.000	0.111822282	0.118605801	1.842081943	3.686415903	10.22375421	10.22797132	14.26694151	17.5628979	26.44245597	30.45028458	35.59590131	34.04048666	34.46339541	34.48986928	32.49494432	22.92241867	6.842177716	17.76614247
14:59:59.976	0.111765045	0.119478977	1.842777535	3.687663122	10.22596228	10.23116423	14.26978239	17.56744133	26.44859833	30.45873087	35.6081606	34.04792655	34.47232636	34.49888395	32.50151522	22.92638697	6.844173757	17.76838897
15:01:15.428	0.116696714	0.123742419	1.892565109	3.770599896	10.40322081	10.40245051	14.50443769	17.84259815	26.841609	30.88950382	36.08370639	34.51658496	34.96027282	34.96882135	32.89987722	23.19210929	7.008649987	17.98549699
15:01:16.421	0.116878445	0.124257332	1.894301756	3.771773088	10.4047811	10.40857259	14.51008183	17.84875084	26.85178464	30.90260558	36.10551489	34.53226902	34.96877847	34.98578036	32.91563441	23.20010818	7.010902596	17.98694932
15:01:17.393	0.116805795	0.124945563	1.8951508	3.773332021	10.40904182	10.41283231	14.51737939	17.85866566	26.86828681	30.92280424	36.13024957	34.5539949	34.99547607	35.01275066	32.93926861	23.2120157	7.016021583	17.99337859
15:01:18.377	0.116935782	0.124249811	1.895820289	3.774380308	10.41157119	10.41639517	14.5228702	17.86517275	26.87827787	30.93625924	36.14589971	34.56972484	35.01518961	35.0309986	32.9600023	23.22546304	7.020767423	18.00287695
15:01:19.343	0.116711572	0.124210441	1.896699682	3.775923906	10.41470927	10.41933948	14.52672294	17.87095487	26.88752168	30.94764688	36.16019784	34.58595049	35.02591517	35.0471022	32.97548781	23.23290899	7.023979394	18.00861101
15:01:20.317	0.116845233	0.124328948	1.897809191	3.777325043	10.41809546	10.42240747	14.53210498	17.87865981	26.89850205	30.96139842	36.17681056	34.60399663	35.04653372	35.06723256	32.99636439	23.24777663	7.029632154	18.01966848
15:01:21.303	0.116887086	0.125159615	1.898357294	3.778274705	10.42035006	10.42491534	14.53674441	17.88363178	26.90554286	30.96965706	36.18593813	34.61336828	35.05588121	35.07678298	33.00324862	23.24833438	7.031310507	18.02110849
15:01:22.269	0.117438374	0.12451105	1.898875064	3.77934493	10.42358266	10.42796383	14.54109209	17.88819933	26.91409921	30.97910029	36.19936712	34.6275387	35.06843255	35.08952832	33.01191461	23.25336643	7.03427507	18.02441132
15:01:23.244	0.117136714	0.124929865	1.899607777	3.780640868	10.42653455	10.43103831	14.54484569	17.89401494	26.92193641	30.99047525	36.21101064	34.64198291	35.08261155	35.10231581	33.02316913	23.26039673	7.037593448	18.03048353
15:01:24.230	0.117102452	0.12464682	1.900244388	3.782013493	10.42946273	10.4339369	14.54915844	17.89945919	26.93007358	30.99891561	36.2262645	34.65131544	35.09226294	35.11320876	33.03138385	23.26450209	7.039685582	18.03255144
15:01:25.208	0.117589972	0.124933501	1.901149057	3.782960972	10.43174691	10.43593686	14.55324361	17.90377342	26.93721538	31.00782295	36.23676864	34.66506266	35.10171513	35.12428275	33.03999824	23.26871863	7.042093181	18.03516778
15:01:26.189	0.117232228	0.125072602	1.901740152	3.784272239	10.43476966	10.43940203	14.5586156	17.90928523	26.94651122	31.01982234	36.25060182	34.68085246	35.11748607	35.13913852	33.0553596	23.28162898	7.047005257	18.04526598
15:01:27.161	0.117657655	0.125947889	1.902311021	3.785278897	10.43705681	10.44186438	14.56150801	17.91348149	26.95195473	31.02564913	36.25637553	34.68711166	35.12211081	35.14421515	33.05676054	23.28050038	7.047459713	18.04276329
15:01:28.136	0.117626734	0.124521951	1.902712458	3.786592362	10.44020072	10.44460673	14.56444986	17.91786323	26.9577222	31.03226003	36.26366864	34.69032694	35.12763232	35.15002952	33.05977151	23.27891094	7.048519976	18.04214412
15:01:29.105	0.117576452	0.125876875	1.903854839	3.787936517	10.44328852	10.44662628	14.568743	17.92288608	26.96514271	31.04088389	36.27329246	34.70324176	35.14155907	35.16191111	33.07114372	23.28811782	7.052776184	18.04969184
15:01:30.081	0.117544529	0.12628454	1.904301793	3.789256554	10.44519453	10.44953142	14.5724916	17.92730151	26.97172076	31.04847232	36.28224345	34.71019558	35.14884439	35.16850839	33.07693268	23.29074256	7.054816159	18.05154366
15:01:31.060	0.117421804	0.124946976	1.904996567	3.790197452	10.44801342	10.45282075	14.57629954	17.93148071	26.97818263	31.05567382	36.28866023	34.71862869	35.15656213	35.17705201	33.08407468	23.29394233	7.056944462	18.05508762
15:01:32.033	0.117597523	0.125072349	1.906022619	3.791563514	10.45057827	10.45360948	14.57962746	17.93557569	26.98403506	31.06264855	36.29798019	34.7249424	35.16642222	35.18422062	33.09117199	23.29910466	7.059727997	18.05894722
15:01:33.019	0.117983216	0.12602658	1.906765436	3.792798063	10.45314304	10.45769324	14.58505376	17.94199819	26.99419479	31.07502208	36.3131143	34.74164659	35.18878329	35.20607936	33.11617281	23.32093823	7.067439062	18.07965114
15:01:33.988	0.118061791	0.12592286	1.907536079	3.794078659	10.45595016	10.45939368	14.58772344	17.94508114	26.99864992	31.07910942	36.31797997	34.74374725	35.19022003	35.2071385	33.11477229	23.31686672	7.066905179	18.07540145
15:01:34.979	0.117832907	0.124925073	1.908286478	3.794896811	10.4582106	10.46167356	14.59100656	17.94922631	27.00351197	31.0834785	36.32094575	34.74723423	35.1936111	35.21047462	33.11539514	23.31712109	7.068197793	18.07455883
15:01:35.939	0.117863746	0.125041864	1.909039425	3.796080992	10.46106209	10.46517788	14.59429998	17.95284921	27.00942734	31.09130715	36.32698454	34.75227503	35.19986314	35.2171315	33.12193617	23.32340635	7.071271667	18.08005992
15:01:36.926	0.117859195	0.125654602	1.909552117	3.797322111	10.46329595	10.46666331	14.59805333	17.95785472	27.01579543	31.09875757	36.3341361	34.76043495	35.20961045	35.22811177	33.13166592	23.33353036	7.075839825	18.08865224
15:01:37.901	0.118139732	0.126568509	1.910171027	3.798444906	10.4655417	10.46886513	14.60025766	17.96021218	27.01973244	31.10135479	36.33903316	34.76248426	35.20874986	35.22665123	33.12825526	23.32836802	7.075774014	18.08399139
15:01:38.871	0.118144196	0.126173915	1.910749479	3.799508536	10.46815086	10.47214147	14.60308568	17.96304205	27.02377032	31.10510079	36.34113467	34.76174039	35.21126425	35.22906396	33.12939915	23.33064775	7.077330457	18.0855984
15:01:39.847	0.117992764	0.125641177	1.911618738	3.800648859	10.47045569	10.47354881	14.6061413	17.96718749	27.02931323	31.11188155	36.35078883	34.77027276	35.21860525	35.23818926	33.13784841	23.33950157	7.081418033	18.09300566
15:01:40.835	0.118097706	0.126694947	1.912333733	3.80166863	10.47278999	10.47698133	14.61025592	17.97079288	27.03441473	31.11742174	36.35637382	34.77784672	35.22440571	35.24390933	33.14237093	23.34236378	7.083671399	18.09546739
15:01:41.800	0.117938933	0.126844347	1.912805977	3.802973331	10.47498556	10.47811522	14.61224259	17.97318427	27.03752646	31.11962206	36.3566207	34.77498339	35.22462582	35.24354805	33.13968765	23.33809922	7.083239117	18.09232489
15:01:42.785	0.11848552	0.12594866	1.913467868	3.803852849	10.47659901	10.48120912	14.61574351	17.97641862	27.04188696	31.12317301	36.36148902	34.779852	35.22585157	35.246337	33.14178315	23.3393127	7.085074628	18.0929718
15:01:43.759	0.118673919	0.127860469	1.914132294	3.804909894	10.4790811	10.48275322	14.61634422	17.97842183	27.04519073	31.1258043	36.36337892	34.77794187	35.22496537	35.24610756	33.14147795	23.33894836	7.085739365	18.09289833
15:01:44.735	0.118482095	0.126180533	1.915158336	3.806186087	10.48125296	10.48530016	14.62056292	17.98158888	27.04954437	31.13206192	36.37338141	34.79054372	35.23386377	35.25494145	33.15277479	23.34748568	7.08983286	18.10109666
15:01:45.713	0.118402101	0.127359581	1.915934025	3.80700425	10.48303189	10.48761916	14.62158427	17.98335585	27.05143468	31.1325668	36.36966431	34.78338095	35.23047474	35.25089512	33.14632822	23.34445734	7.08937382	18.09825086
15:01:46.688	0.118678293	0.126242516	1.91611545	3.808409741	10.48469857	10.48904603	14.62326392	17.98497106	27.05217482	31.13241264	36.36162493	34.78157551	35.22892803	35.2484498	33.1418672	23.34232433	7.089681539	18.09778117
15:01:47.661	0.118920434	0.127213061	1.916822864	3.809543487	10.48700044	10.49109155	14.62640368	17.9873285	27.05476054	31.13416861	36.36493624	34.78123946	35.22750566	35.24799683	33.14207597	23.34432724	7.091387174	18.09983734
15:01:48.650	0.118712586	0.127086176	1.917621304	3.810267397	10.48897428	10.49296766	14.62878595	17.98923016	27.05771519	31.13603646	36.36790851	34.78089401	35.22869931	35.24931869	33.14146188	23.34373056	7.092666711	18.10057848
15:01:49.619	0.118873276	0.126444462	1.917997449	3.81130253	10.49020374	10.49455736	14.62956984	17.99067681	27.05933614	31.13598528	36.36464746	34.77683708	35.22269257	35.2445812	33.13338485	23.33795457	7.091849677	18.09540134
15:01:50.600	0.118770915	0.126888173	1.91888693	3.812383666	10.49323233	10.49731915	14.63197696	17.99370878	27.06348064	31.13975251	36.37189163	34.78206532	35.22683359	35.24826621	33.13828297	23.34088439	7.094046296	18.09942069
15:01:51.570	0.119138237	0.127270104	1.919379397	3.812923515	10.49445292	10.49839439	14.63207287	17.99387344	27.06217514	31.13621115	36.36197835	34.77185671	35.21663844	35.23641208	33.12070484	23.32702522	7.089857524	18.08726865
15:01:52.554	0.119436454	0.127791898	1.920557157	3.814421031	10.4975967	10.5011236	14.63663292	17.99847405	27.06947721	31.14566213	36.37600539	34.78466029	35.2294078	35.25143104	33.14236261	23.34529653	7.096377533	18.1032301
15:01:53.523	0.119551743	0.126763205	1.921085027	3.81514935	10.49913931	10.50264817	14.63802557	18.00030864	27.07087418	31.14578144	36.37159294	34.78336992	35.22911615	35.24967001	33.13552311	23.34152387	7.09582228	18.10049638
15:01:54.505	0.119584243	0.127456609	1.921537025	3.816289652	10.5010216	10.50412057	14.64067518	18.00207548	27.07316542	31.14697927	36.372244	34.77837675	35.22507126	35.24630545	33.13007965	23.33718123	7.095383905	18.09575268
15:01:55.472	0.119724568	0.127261934	1.922123058	3.81739272	10.50330576	10.50657637	14.64311217	18.0043318	27.07588287	31.1500204	36.37493133	34.7821891	35.22680204	35.2471185	33.13199471	23.33838024	7.097417112	18.09791953
15:01:56.458	0.119680623	0.127289496	1.923032762	3.818708334	10.50561935	10.51002838	14.64559344	18.00783592	27.08173302	31.15623109	36.38399005	34.79055225	35.23515021	35.25591532	33.1432866	23.34704924	7.101783125	18.10780579
15:01:57.422	0.119284845	0.127405434	1.923355803	3.820048086	10.50767309	10.5110255	14.64876296	18.01117183	27.08546989	31.15935207	36.38533573	34.79440384	35.23535501	35.25752351	33.143732	23.34718321	7.101977772	18.10658853
15:01:58.409	0.119502276	0.126931895	1.92469287	3.821190568	10.51043573	10.51495288	14.65343182	18.01717234	27.09470163	31.17103057	36.40480924	34.81444498	35.25513727	35.2781576	33.16818811	23.37341278	7.109575459	18.12519502
15:01:59.384	0.119815846	0.128250819	1.92479337	3.822276088	10.5126962	10.51580016	14.65559151	18.0190405	27.09659971	31.17236549	36.40231008	34.81129772	35.25039279	35.27395569	33.15905911	23.35991422	7.106845118	18.11601783
15:02:00.361	0.119516205	0.128038126	1.925771355	3.823350647	10.51488575	10.51878986	14.65795905	18.02161706	27.10089102	31.17611018	36.41064007	34.81235198	35.25191947	35.27434063	33.15578831	23.35092868	7.105856186	18.10868276
15:03:16.028	0.126110049	0.132616313	1.983767862	3.918873039	10.72482987	10.72803353	14.95456219	18.37764167	27.62030584	31.77139849	37.09522544	35.48936695	35.93817382	35.96230801	33.74412872	23.72047584	7.287184984	18.38228773
15:03:17.013	0.125221581	0.133413196	1.983744665	3.919690669	10.7272976	10.73152519	14.95640826	18.3804669	27.62552246	31.77467085	37.09778603	35.49160237	35.94717519	35.9667246	33.75403641	23.72102823	7.288698527	18.38384106
15:03:17.991	0.125482299	0.133575968	1.984925135	3.921143844	10.73135187	10.73587654	14.9604619	18.3847769	27.63282381	31.78142173	37.1026762	35.49445206	35.95063733	35.97015901	33.75249505	23.7168749	7.28847101	18.38065262
15:03:18.960	0.12559916	0.133797947	1.985604953	3.922963033	10.73458806	10.73934252	14.96542666	18.39143193	27.64371521	31.79507209	37.12433777	35.5122428	35.97093648	35.99343253	33.78073893	23.74004738	7.295816233	18.39882612
15:03:19.945	0.125760748	0.133261394	1.98619369	3.923942815	10.73741615	10.7413365	14.97094952	18.39854074	27.65381746	31.80766321	37.1442724	35.52868835	35.9890968	36.01316788	33.80170049	23.75726812	7.301447582	18.41161079
15:03:20.914	0.125751776	0.133398425	1.987230044	3.925639276	10.74081774	10.74428805	14.97497394	18.40302007	27.66131258	31.81522198	37.1490788	35.53630796	35.99823094	36.02154666	33.80631862	23.7598683	7.302768428	18.41211831
15:03:21.893	0.125621311	0.132889334	1.987831438	3.927004771	10.74319103	10.74774723	14.97809208	18.4070262	27.6666145	31.8217906	37.15601348	35.54138649	36.00242936	36.02397394	33.80403019	23.75074698	7.301210189	18.40497661
15:03:22.863	0.125902389	0.13378403	1.988645263	3.928052571	10.7471952	10.75065966	14.98484306	18.41556974	27.6802841	31.84020209	37.18245476	35.5710133	36.03449448	36.05486076	33.83737946	23.77603927	7.309318033	18.42412985
15:03:23.849	0.126148423	0.133309261	1.989805462	3.929680976	10.75076469	10.75385818	14.99066259	18.42365633	27.69364309	31.85722474	37.20450581	35.59731918	36.0601529	36.07924629	33.86032158	23.79342493	7.314510262	18.43608177
15:03:24.825	0.125757278	0.134419323	1.990437201	3.9311166	10.75352205	10.75719368	14.99503775	18.42830344	27.70096735	31.86396398	37.2104872	35.60267385	36.06610404	36.08237834	33.85535183	23.77970804	7.311324536	18.42216688
15:03:25.793	0.125928545	0.133762652	1.991104364	3.932688136	10.75631209	10.76012565	14.999933	18.43507616	27.71060022	31.87719324	37.22643293	35.62029772	36.0760158	36.09597825	33.86493681	23.77808006	7.31191366	18.41864015
15:03:26.779	0.126021709	0.133685163	1.992049621	3.93406452	10.76057573	10.76409247	15.00625715	18.44382025	27.72483881	31.89540875	37.25332974	35.65009031	36.10534305	36.12377321	33.89347484	23.79931968	7.318414938	18.43432607
15:03:27.760	0.126262068	0.134518924	1.992638352	3.934971983	10.76366673	10.76693944	15.01191847	18.45042296	27.73553518	31.90803366	37.26842371	35.6612761	36.11929143	36.13891206	33.90687934	23.80476863	7.320672482	18.43695619
15:03:28.726	0.125953699	0.133472704	1.993571021	3.936523796	10.76609639	10.77090021	15.01610608	18.4563356	27.7441415	31.91846728	37.27981879	35.67133421	36.12959484	36.15073401	33.91700057	23.80855449	7.322495011	18.43934488
15:03:29.717	0.126730103	0.135220279	1.994564298	3.93802285	10.76950909	10.77338227	15.02170233	18.46442128	27.7558168	31.93390886	37.29698147	35.69394542	36.15332227	36.17345041	33.94000885	23.82617914	7.329098715	18.4555873
15:03:30.683	0.126032551	0.134620244	1.995188469	3.939528634	10.77293718	10.77632725	15.0259146	18.46881602	27.76379008	31.94218313	37.3074096	35.70010735	36.16115649	36.18284567	33.94565226	23.82900608	7.331325868	18.45788027
15:03:31.669	0.126079988	0.134006478	1.995600174	3.940523704	10.77523336	10.77909591	15.02937832	18.47278724	27.76891309	31.94848857	37.31232253	35.70703678	36.16630993	36.18727103	33.9478609	23.82880755	7.332404151	18.45704699
15:03:32.641	0.126534632	0.133467368	1.996439256	3.941477225	10.77745899	10.78219047	15.03314478	18.47692838	27.77564299	31.95551184	37.31873132	35.71501802	36.1752606	36.19676503	33.95581067	23.8345839	7.33517664	18.46165507
15:03:33.617	0.126609772	0.134803932	1.997124078	3.942665189	10.78043187	10.78396964	15.03658929	18.48052946	27.78095998	31.96079583	37.32625696	35.72011774	36.17946326	36.2018079	33.95844228	23.83510214	7.336782858	18.46325018
15:03:34.588	0.126566088	0.135333936	1.997730527	3.943686642	10.78163837	10.7861982	15.03690675	18.48080884	27.78087487	31.95836446	37.32005385	35.7080245	36.1656753	36.18952216	33.93999573	23.81483469	7.330810796	18.44327383
15:03:35.562	0.126468999	0.134882346	1.998842684	3.945159484	10.7849185	10.78900618	15.04143999	18.4875804	27.79161777	31.97311466	37.34161207	35.7308981	36.18777764	36.21476871	33.96916417	23.84152343	7.339791363	18.46666017
15:03:36.537	0.127162628	0.134409306	1.99951486	3.945946432	10.78724149	10.79044025	15.04525562	18.49182228	27.79682669	31.9796941	37.34801983	35.73604752	36.19467066	36.221757	33.97520034	23.84511408	7.342013114	18.46897767
15:03:37.522	0.126834232	0.134160211	2.000687665	3.947557248	10.78912702	10.79425717	15.04784833	18.49488274	27.80158682	31.98244254	37.35190678	35.73679662	36.19781909	36.22282804	33.97680264	23.84606584	7.343778493	18.46997061
15:03:38.486	0.126521857	0.135201601	2.000570949	3.948824158	10.79146209	10.7938293	15.04966552	18.49711884	27.80557746	31.98705753	37.35984246	35.74346607	36.20124152	36.22786264	33.98032405	23.84942003	7.345756677	18.47351734
15:03:39.471	0.126843326	0.135275983	2.001268375	3.949718406	10.79334169	10.79698856	15.05174357	18.49982512	27.80892515	31.9894991	37.35894899	35.74354194	36.20431255	36.22765909	33.97929143	23.84925687	7.346967561	18.47391061
15:03:40.441	0.127121736	0.134971121	2.002006301	3.950641235	10.79635304	10.79960125	15.0551982	18.50335907	27.81354021	31.99477226	37.36120861	35.74663976	36.20996465	36.23280373	33.98427968	23.85091421	7.349084192	18.47699229
15:03:41.427	0.127068039	0.134762354	2.003009677	3.951993452	10.79815875	10.8031902	15.05804807	18.5058797	27.81789105	31.99844088	37.36727816	35.75254762	36.20960816	36.23501474	33.986581	23.85199923	7.350271715	18.47662215
15:03:42.407	0.126960937	0.135514577	2.00339104	3.953249287	10.80127911	10.80552263	15.0626747	18.51167228	27.82651816	32.00958743	37.38467163	35.76913366	36.22784726	36.2517948	34.00387685	23.86387582	7.355521736	18.48855811
15:03:43.375	0.127136211	0.135640443	2.004305965	3.954776916	10.8042698	10.80766653	15.06583743	18.51672397	27.83439793	32.01919015	37.3965708	35.77877019	36.23947764	36.26292092	34.01539397	23.86850459	7.357642587	18.49091781
15:03:44.346	0.127604875	0.135879567	2.00491998	3.955822437	10.80707134	10.80965408	15.07096434	18.52337729	27.84485502	32.03212182	37.41132275	35.7943042	36.25729624	36.27934524	34.03138655	23.87490537	7.360292161	18.49519788
15:03:45.331	0.127516132	0.13528126	2.006209076	3.957299548	10.81114269	10.81499448	15.07756979	18.53201903	27.85976357	32.05150574	37.4402407	35.82809779	36.28796306	36.30820845	34.05903201	23.89496387	7.366563656	18.50872596
15:03:46.313	0.127258162	0.136401564	2.006562611	3.958702169	10.81445494	10.81711195	15.08185966	18.5382496	27.8691928	32.06183344	37.45180729	35.83946827	36.2992743	36.31656868	34.06201	23.88801679	7.364848822	18.49966341
15:03:47.281	0.127251527	0.135908799	2.007654526	3.960284562	10.81773505	10.82058406	15.08795646	18.54694337	27.88434229	32.08059448	37.47870348	35.86719604	36.32891457	36.34365832	34.08767857	23.90372421	7.370752897	18.51199653
15:03:48.251	0.127654104	0.135651989	2.008630118	3.961847215	10.82174175	10.82548853	15.09512186	18.55553569	27.8963195	32.09734381	37.496144	35.88711569	36.3478917	36.36348039	34.10404322	23.90696705	7.372613966	18.51165743
15:03:49.236	0.127421168	0.136175967	2.009651175	3.963466739	10.82561807	10.82828954	15.10386959	18.56711114	27.91617457	32.12419264	37.53049823	35.92700451	36.3943721	36.40747893	34.15033887	23.9402089	7.383507203	18.53673843
15:03:50.219	0.127603786	0.135511599	2.010689935	3.964992047	10.83004089	10.83463909	15.11172673	18.5777761	27.93493383	32.14942798	37.56560863	35.96011239	36.42923192	36.44573124	34.18672553	23.96558973	7.391578152	18.55515678
15:03:51.187	0.127837471	0.136051881	2.011311529	3.967017055	10.8345143	10.83786371	15.1185754	18.58953842	27.95340135	32.17419933	37.59724398	35.99572845	36.46701739	36.48019738	34.22477192	23.98832393	7.39850801	18.56965473
15:03:52.160	0.127763413	0.136409405	2.012117689	3.968261935	10.83833475	10.84190858	15.12572056	18.5985179	27.96836443	32.19287924	37.61960066	36.01990533	36.49092866	36.50204044	34.23915186	23.98969851	7.399095317	18.56701154
15:03:53.149	0.127788822	0.137206222	2.01302241	3.969872647	10.84291095	10.84642832	15.1336068	18.60914825	27.9873541	32.21741998	37.64867935	36.05265729	36.52771242	36.53804255	34.27285343	24.00704146	7.405417952	18.57856052
15:03:54.113	0.128114964	0.136463784	2.01402076	3.971652244	10.84746121	10.85112447	15.14153915	18.62131531	28.00674774	32.24421387	37.68664608	36.09045784	36.56683204	36.57531426	34.30835804	24.02841377	7.41295474	18.59395779
15:03:55.092	0.128258197	0.136031941	2.014692882	3.973249863	10.8511692	10.85477196	15.1486194	18.63076606	28.02242748	32.26413094	37.71207079	36.11243623	36.59524394	36.60425303	34.33653636	24.0451057	7.418717403	18.60529075
15:03:56.066	0.128253898	0.136875091	2.015473744	3.974731374	10.8544933	10.85789217	15.15317156	18.63745185	28.03468887	32.27782178	37.72882434	36.13067493	36.60862057	36.6222823	34.35207999	24.05235484	7.421411848	18.6085732
15:03:57.051	0.12798191	0.136049426	2.016300083	3.975960814	10.85683938	10.86147437	15.15888074	18.64337776	28.04354559	32.28905661	37.74247843	36.14455206	36.61691817	36.63384696	34.35890044	24.05027777	7.421635149	18.60644414
15:03:58.026	0.128421538	0.1356296	2.017434928	3.977183743	10.86066263	10.86421038	15.16306661	18.65021509	28.05266575	32.30265619	37.75512222	36.15448126	36.63110313	36.6477841	34.37267143	24.05710274	7.424449514	18.6115381
15:03:59.011	0.128340471	0.137294701	2.017839001	3.978623534	10.8637176	10.86708286	15.16716271	18.65666358	28.06327414	32.31516342	37.7731678	36.1687332	36.64372364	36.66319381	34.38343138	24.06292343	7.426744388	18.61484463
15:03:59.979	0.128442315	0.136904906	2.018978919	3.979476181	10.86692069	10.86940234	15.17168542	18.66221997	28.07297373	32.32682077	37.78913961	36.18685666	36.65939936	36.67812735	34.39864963	24.06936437	7.429289554	18.61859154
15:05:15.401	0.133442788	0.143663952	2.077486594	4.083473673	11.08991141	11.09306584	15.4671672	19.07831837	28.7458113	33.15147745	38.79517367	37.19713775	37.6349197	37.67161428	35.34727898	24.64106565	7.65924876	19.02600866
15:05:16.378	0.133768021	0.142334831	2.07827665	4.084059146	11.09172147	11.09411322	15.46675566	19.07837059	28.74671786	33.14981297	38.78760358	37.19208657	37.63481522	37.66795517	35.34407492	24.64378822	7.661423097	19.03015012
15:05:17.355	0.133765175	0.141911606	2.079339744	4.085621756	11.09369986	11.09604587	15.46693763	19.07859135	28.74610469	33.14730803	38.78373299	37.18779635	37.62591603	37.6602746	35.34161629	24.64816827	7.664098417	19.03640065
15:05:18.324	0.133941555	0.141635077	2.079487675	4.086382561	11.09442047	11.0963319	15.46518149	19.07650413	28.74191327	33.13947773	38.76914121	37.1712962	37.60932197	37.64166068	35.32315895	24.63800323	7.661482052	19.02874636
15:05:19.294	0.133801872	0.142184656	2.08022213	4.087570578	11.09606537	11.09862279	15.46579432	19.0765572	28.74097716	33.13682649	38.76146837	37.16318203	37.60177471	37.63417274	35.31956204	24.64024936	7.663063344	19.03205948
15:05:20.287	0.133923846	0.14266045	2.081295265	4.088878893	11.09755002	11.10070457	15.46624205	19.07637158	28.74087083	33.13455728	38.7566998	37.15936684	37.59581047	37.62944748	35.31558347	24.63991618	7.664389589	19.03442732
15:05:21.252	0.134123923	0.142103408	2.081650514	4.089600285	11.09898835	11.10110139	15.46555949	19.07634098	28.7401206	33.13132775	38.74852267	37.1503282	37.58861022	37.62120187	35.30758657	24.63829722	7.665470305	19.03484337
15:05:22.240	0.134594331	0.142713026	2.082003144	4.090783754	11.10121142	11.10168619	15.46621535	19.07736938	28.74104098	33.13104707	38.74721843	37.14698889	37.5844707	37.61641147	35.30419248	24.63964832	7.667060136	19.0358654
15:05:23.199	0.13451072	0.142220326	2.083496071	4.091860111	11.10299249	11.10645093	15.46935631	19.08067637	28.74619291	33.13833575	38.75424094	37.15479	37.59209633	37.62535923	35.31834817	24.65307669	7.672688321	19.04688253
15:05:24.190	0.134087681	0.143630302	2.083623682	4.093380939	11.10540444	11.10792737	15.47108016	19.08268184	28.74933446	33.14089386	38.75593854	37.15673699	37.59128706	37.62559445	35.3199604	24.65475405	7.674073515	19.04904648
15:05:25.166	0.134445617	0.14228405	2.084484505	4.094533822	11.10777554	11.11118134	15.47397238	19.08752033	28.75678259	33.15041675	38.77011778	37.16782953	37.60601174	37.63830055	35.33327044	24.66791701	7.678628247	19.06067073
15:05:26.142	0.134521868	0.143044644	2.085246728	4.096162117	11.11045669	11.11453944	15.47647388	19.09240932	28.76450834	33.15869023	38.77963838	37.17945665	37.61275567	37.64737618	35.3412001	24.67373229	7.681471522	19.06602232
15:05:27.111	0.134684895	0.142785275	2.085912908	4.097227415	11.11347471	11.11550237	15.47881766	19.0957655	28.76998258	33.16511365	38.78609251	37.18151498	37.61638701	37.65228765	35.34552237	24.67391015	7.682324179	19.06636877
15:05:28.102	0.134544876	0.142503597	2.086735742	4.098636486	11.11621734	11.11826759	15.48247513	19.10114131	28.77828454	33.17579198	38.79764531	37.19520455	37.62841302	37.66451898	35.3566831	24.68305521	7.685980368	19.07294051
15:05:29.062	0.134679535	0.142967382	2.087624424	4.100120303	11.12021899	11.12097526	15.48770285	19.10849248	28.790795	33.19197267	38.81751176	37.2213189	37.65338813	37.68905842	35.38655743	24.70335776	7.693125376	19.08928922
15:05:30.042	0.135148271	0.144027348	2.088700104	4.101632425	11.12255149	11.12566752	15.49196944	19.11344816	28.79936066	33.20148296	38.82750364	37.23374335	37.6590848	37.69544007	35.38954723	24.70106341	7.692600124	19.0861766
15:05:31.023	0.134611429	0.142699126	2.088961732	4.103267219	11.1265583	11.12846557	15.4973338	19.12140333	28.81249264	33.21793211	38.84671305	37.25295924	37.68111194	37.7160177	35.4072786	24.71335172	7.696583321	19.09405661
15:05:32.003	0.134776456	0.14250924	2.089961563	4.103924905	11.12921854	11.132598	15.50117498	19.12683072	28.82089611	33.22821443	38.86168473	37.26463348	37.69092184	37.7248451	35.41257371	24.71220579	7.695832824	19.09016853
15:05:32.976	0.135086328	0.143821402	2.091125743	4.105693396	11.13279149	11.13484301	15.50565466	19.13409574	28.83270999	33.24325646	38.87914828	37.28665733	37.70864709	37.74373826	35.42842123	24.71889491	7.69822971	19.09556082
15:05:33.953	0.135085149	0.143021607	2.091748895	4.107448701	11.13602468	11.13891041	15.51149395	19.14243871	28.84532537	33.2603759	38.90307534	37.31283073	37.73162703	37.76914138	35.45698229	24.73903663	7.704414652	19.10920973
15:05:34.928	0.135130695	0.144061833	2.092680477	4.108875394	11.14004047	11.14224233	15.51785262	19.1500235	28.85989248	33.27804066	38.92413812	37.33720717	37.75960108	37.79359536	35.4830284	24.75822648	7.710725923	19.12466816
15:05:35.902	0.135313076	0.143534827	2.093526106	4.11060223	11.14327667	11.14535947	15.51995829	19.15442335	28.86682313	33.28563198	38.93005059	37.34195823	37.76582371	37.80020116	35.48406314	24.75598139	7.71047682	19.12174741
15:05:36.889	0.135372302	0.143710368	2.094083481	4.111290506	11.14565311	11.14891875	15.52238926	19.15809698	28.87202398	33.29093816	38.93409991	37.34539864	37.76377363	37.79904005	35.47952696	24.74551197	7.708639452	19.11396659
15:05:37.856	0.135353436	0.144007724	2.095164241	4.113473077	11.14940038	11.15186035	15.52868908	19.16698005	28.88677703	33.31135223	38.96230575	37.3676323	37.79605845	37.82856648	35.51323669	24.77362633	7.717560996	19.13403814
15:05:38.842	0.135186385	0.144117213	2.095360104	4.11475506	11.15213708	11.15385748	15.53199044	19.17179956	28.89456189	33.3205537	38.97470529	37.37496465	37.80152983	37.83542462	35.52067027	24.77661047	7.718783781	19.13505908
15:05:39.805	0.135627083	0.144187249	2.096413064	4.116330799	11.15507828	11.15801635	15.53582279	19.17754859	28.90454066	33.33218954	38.99068527	37.39244163	37.81693472	37.85182844	35.54031513	24.79340754	7.723763503	19.14820682
15:05:40.795	0.135503752	0.142509067	2.097028564	4.116999315	11.1567488	11.15952514	15.53584012	19.17820528	28.90437225	33.32946581	38.98246095	37.38031328	37.8055756	37.83941918	35.51880139	24.7722293	7.717948145	19.13022294
15:05:41.766	0.135736192	0.144055385	2.097659304	4.118261693	11.16010017	11.16184168	15.54094762	19.18462728	28.91498219	33.34445017	39.00612483	37.40703182	37.82593479	37.8646877	35.55297337	24.80591358	7.728287123	19.15873942
15:05:42.737	0.135858831	0.142987972	2.09883104	4.120003848	11.1608618	11.16457477	15.54083296	19.1853199	28.9152716	33.34261565	38.99962071	37.3999368	37.81859277	37.85744476	35.54439129	24.79820696	7.726777534	19.15373809
15:05:43.713	0.136024188	0.144391886	2.099163448	4.121009851	11.16294026	11.16517928	15.54134098	19.18614672	28.91612335	33.34251774	38.9971358	37.39605956	37.81465184	37.85072516	35.53815928	24.79501157	7.7260398	19.15004137
15:05:44.703	0.135702281	0.143808269	2.100051964	4.121739693	11.16409693	11.16666851	15.54146707	19.18432629	28.91212141	33.33458152	38.97916908	37.37755384	37.79849026	37.83275461	35.51571508	24.77848801	7.721714661	19.13768983
15:05:45.674	0.13571245	0.144725806	2.100573989	4.122745732	11.16626412	11.16881577	15.54187659	19.18581088	28.91451654	33.33605172	38.98188226	37.37885994	37.79746499	37.83473694	35.52045291	24.78667414	7.725249488	19.14678079
15:05:46.645	0.135959573	0.144535925	2.101548527	4.124303839	11.16768717	11.17040326	15.54301303	19.18662143	28.91560812	33.33698817	38.9794187	37.37871631	37.7967692	37.83149264	35.52228	24.79144799	7.72780358	19.15196775
15:05:47.619	0.136101901	0.144415525	2.101848071	4.125353658	11.16987786	11.1724072	15.54223054	19.18785286	28.9176094	33.3379922	38.97986453	37.37751892	37.79445083	37.8297327	35.52240607	24.79571965	7.730491968	19.15675928
15:05:48.604	0.136041314	0.144116702	2.102761876	4.126392425	11.17208589	11.17484683	15.5453191	19.1905995	28.92199239	33.34345711	38.9889064	37.38158771	37.79947939	37.83640071	35.53237716	24.80687457	7.735321337	19.16670263
15:05:49.569	0.136393564	0.144260506	2.103440651	4.127847601	11.1739107	11.17737826	15.54615435	19.19356754	28.92618544	33.34692696	38.99119418	37.38650604	37.80135951	37.83859716	35.53865375	24.81601115	7.738866948	19.17485584
15:05:50.555	0.136661708	0.145036492	2.103848847	4.12891702	11.17544837	11.17890011	15.54644887	19.19218572	28.92388101	33.3422054	38.97657976	37.37505797	37.78786678	37.82323106	35.51905325	24.79980713	7.734304616	19.16100996
15:05:51.531	0.136455612	0.145146836	2.104770262	4.129973376	11.17772753	11.17951758	15.54526072	19.19129375	28.92276588	33.33887111	38.96793984	37.36308956	37.77181442	37.80966658	35.50015566	24.78407509	7.729945461	19.14869054
15:05:52.504	0.136401702	0.144815421	2.105552647	4.131253209	11.17974103	11.18200965	15.54910182	19.19672086	28.9293487	33.34663193	38.9771821	37.37200159	37.78065637	37.81940963	35.51138862	24.7948331	7.733456496	19.1576439
15:05:53.484	0.136917811	0.14418464	2.106269274	4.132500116	11.1823596	11.18510026	15.55126104	19.19923206	28.93456525	33.35265399	38.98408359	37.37757658	37.78484243	37.82148939	35.51323539	24.79454002	7.733560028	19.15802671
15:05:54.461	0.136753767	0.144592635	2.107071861	4.133363666	11.18485424	11.18698685	15.55335619	19.20226592	28.93925771	33.3565076	38.98567808	37.37662636	37.78512266	37.82198439	35.51065952	24.79147322	7.732561291	19.15502384
15:05:55.431	0.136447554	0.145126724	2.107485165	4.135386165	11.18732253	11.18835949	15.55637164	19.206598	28.94593335	33.36463213	38.99335746	37.38638781	37.79096958	37.82947234	35.51732975	24.7944138	7.733410741	19.15716385
15:05:56.417	0.136924613	0.144482219	2.108300351	4.136356974	11.18963672	11.19297937	15.55862919	19.21124826	28.95289195	33.37342364	39.00388299	37.3976819	37.80198882	37.83852928	35.52702024	24.80177043	7.735409437	19.16310741
15:05:57.394	0.136886053	0.144625158	2.109113042	4.137487778	11.19168545	11.19532153	15.56049187	19.21333843	28.95605713	33.37519904	39.00285631	37.39536463	37.79797098	37.8358304	35.52227905	24.79648549	7.734406508	19.1589894
15:05:58.375	0.136730353	0.145235582	2.109779092	4.139085164	11.1943925	11.19701268	15.5621663	19.21578193	28.96131955	33.38094808	39.01096574	37.40281837	37.80060705	37.84137129	35.53078387	24.80641665	7.737607072	19.16610371
15:05:59.340	0.137347248	0.145628134	2.110614577	4.140064902	11.19593963	11.20025991	15.56315966	19.21745225	28.96353776	33.38244172	39.01000163	37.39964503	37.79883255	37.83898917	35.52479028	24.80197657	7.737144027	19.16303625
15:06:00.326	0.136977289	0.145475994	2.11108595	4.141048838	11.19825377	11.20013498	15.56395843	19.21940648	28.96501245	33.38330699	39.00741551	37.39559986	37.79696311	37.83683446	35.5245856	24.80447863	7.738869048	19.1668715
15:07:15.976	0.142870958	0.147156739	2.170826161	4.246797753	11.40840186	11.41249537	15.79658316	19.5560278	29.45528771	34.01988134	39.72198938	38.11057171	38.44392582	38.50290243	36.21198292	25.32186335	7.94104822	19.57028113
15:07:16.959	0.143385482	0.150791029	2.172172801	4.248002711	11.41199436	11.41621165	15.8012059	19.56181982	29.47167019	34.02982295	39.72883144	38.12262764	38.45634354	38.51419903	36.22316582	25.33148801	7.942833461	19.57145664
15:07:17.940	0.143532943	0.150670631	2.173109972	4.250147346	11.41738177	11.42048106	15.80736098	19.57217597	29.48663415	34.05060453	39.75336669	38.14820634	38.4836672	38.53865248	36.2446774	25.3438043	7.947891372	19.58110921
15:07:18.912	0.143429472	0.150332401	2.173710999	4.251783868	11.42099517	11.42393079	15.81260709	19.57884457	29.50213084	34.06589387	39.76938267	38.16776144	38.50081461	38.55649116	36.26184212	25.35484041	7.951394756	19.58869917
15:07:19.891	0.143298303	0.151053329	2.174941372	4.253394056	11.42439287	11.42871427	15.81703718	19.58475464	29.51296236	34.07821938	39.78456283	38.18082028	38.515249	38.57145956	36.27670094	25.36212653	7.954300441	19.59418154
15:07:20.872	0.143105735	0.15101612	2.175876008	4.254903469	11.42677204	11.43127878	15.8198459	19.58946877	29.52003897	34.08709391	39.79359751	38.19219292	38.52215794	38.57982114	36.28483629	25.36581529	7.955675792	19.5952757
15:07:21.839	0.143452746	0.151679588	2.176550344	4.2563604	11.42885928	11.43237957	15.81993693	19.59063061	29.52069466	34.08550588	39.78794366	38.18190671	38.51246379	38.56842513	36.26669235	25.35102283	7.951401065	19.58284444
15:07:22.828	0.143579848	0.150533481	2.177859031	4.257679193	11.43197921	11.4359134	15.82433669	19.59665757	29.53154049	34.09893032	39.80770953	38.20233736	38.5313434	38.58823271	36.29338634	25.37460284	7.959019675	19.60265436
15:07:23.803	0.143571478	0.150970534	2.178156728	4.258667328	11.43364999	11.43782734	15.82444206	19.59706083	29.53362938	34.09713653	39.80130515	38.19662595	38.52465037	38.58022645	36.2859858	25.37067282	7.958100529	19.5994713
15:07:24.780	0.143712264	0.150885301	2.178934657	4.259824105	11.43561297	11.44026177	15.82729049	19.59982163	29.53980419	34.10117636	39.80398589	38.19952277	38.52944133	38.58403636	36.29228472	25.37873857	7.961672365	19.6075752
15:07:25.755	0.144152365	0.15144499	2.179318288	4.261259065	11.43775017	11.44058149	15.82796425	19.60113428	29.53712849	34.10293514	39.81039588	38.20123043	38.52729488	38.58470022	36.29672351	25.38672932	7.964605432	19.61456564
15:07:26.735	0.143972812	0.151149641	2.180503142	4.262674275	11.43960383	11.44474016	15.83083224	19.60381057	29.54323357	34.10713328	39.81157899	38.20786055	38.53655406	38.59136557	36.30397467	25.39620206	7.968580292	19.6247872
15:07:27.702	0.143903046	0.151923731	2.18115219	4.26405452	11.44262092	11.44669982	15.83218359	19.60702688	29.54616351	34.11160604	39.82129953	38.21543613	38.54021655	38.59735427	36.31330077	25.40774089	7.972508047	19.63506631
15:07:28.683	0.144085205	0.151312784	2.181725365	4.264722811	11.44416458	11.44708443	15.8324665	19.60808634	29.55349425	34.11206981	39.81946916	38.21364455	38.5348744	38.59374261	36.31089876	25.40800856	7.972630527	19.63523621
15:07:29.657	0.14442186	0.152098874	2.182275813	4.266339559	11.44659402	11.45106103	15.83541388	19.61076309	29.55554458	34.11592839	39.82287259	38.21595819	38.53723345	38.59604689	36.31275584	25.41039088	7.97417853	19.63824664
15:07:30.644	0.144388791	0.151850692	2.18341261	4.267559769	11.44921796	11.45427597	15.83630436	19.6142807	29.56020718	34.12019325	39.82599025	38.21904462	38.54044719	38.59882682	36.31598012	25.41435332	7.975727267	19.64043857
15:07:31.616	0.14457362	0.151250045	2.1842512	4.268920254	11.45181864	11.45626799	15.83937044	19.6160482	29.5606541	34.12455148	39.83135689	38.21939808	38.54003483	38.59804097	36.31541903	25.4127377	7.975919971	19.63889953
15:07:32.591	0.144212883	0.152118458	2.184809221	4.270582978	11.45416537	11.45853322	15.84254506	19.62059407	29.5724028	34.13189411	39.83825217	38.22534628	38.54523742	38.60515378	36.32067129	25.41698044	7.977234516	19.64247994
15:07:33.555	0.144425744	0.151322284	2.18546585	4.271525155	11.45647693	11.46051242	15.84434134	19.62308635	29.57419188	34.13685517	39.84171058	38.22728263	38.54682295	38.60472745	36.31899688	25.41602118	7.97714853	19.64107889
15:07:34.548	0.144819779	0.152885336	2.186195683	4.272900824	11.45923647	11.463584	15.84710957	19.62764742	29.57903881	34.14498897	39.846264	38.23322	38.55375275	38.61310637	36.32763763	25.42269728	7.979478243	19.64593094
15:07:35.516	0.144800731	0.152030846	2.186751194	4.274467207	11.46263721	11.46690348	15.85075902	19.63286739	29.59123515	34.15443226	39.86113648	38.24163177	38.56245946	38.62306622	36.33828799	25.43124195	7.98342638	19.65246007
15:07:36.503	0.145022256	0.152289502	2.187622584	4.276007179	11.46546772	11.46946115	15.85389329	19.63736153	29.59703854	34.16412181	39.86945918	38.25544064	38.5687121	38.6331315	36.34830284	25.43957922	7.986067562	19.65856288
15:07:37.474	0.145016219	0.151657131	2.188605234	4.277464019	11.46803294	11.47268943	15.85759688	19.64276639	29.61015958	34.1740978	39.87934831	38.26718317	38.57855925	38.64446241	36.36162613	25.44945524	7.989063331	19.66817364
15:07:38.441	0.144728564	0.152454355	2.189527233	4.278682137	11.47142185	11.47442124	15.85989209	19.64633601	29.61434582	34.18111223	39.88449252	38.27377742	38.58546599	38.650651	36.36922959	25.45616399	7.99062428	19.67339876
15:07:39.411	0.145117597	0.153633199	2.190247018	4.280226586	11.47419076	11.47725261	15.8629334	19.65108412	29.62168486	34.19028241	39.89665286	38.28805325	38.59268021	38.6627629	36.38325046	25.47116945	7.994807213	19.68508711
15:07:40.403	0.14547392	0.151950287	2.191227066	4.281720512	11.47620341	11.48012894	15.86629464	19.65557767	29.62438847	34.197315	39.90507223	38.2926244	38.60134261	38.66875369	36.39258807	25.48023343	7.997880454	19.69164952
15:07:41.367	0.145374791	0.15352533	2.191572794	4.28332413	11.4786123	11.48338988	15.86688485	19.6573793	29.62853637	34.2003008	39.90659365	38.29457667	38.59767723	38.66774673	36.38830841	25.47587902	7.996804568	19.6879394
15:07:42.352	0.145310356	0.152013085	2.19266407	4.284450123	11.48154612	11.48674136	15.87042933	19.66165448	29.63568883	34.20674434	39.90992765	38.30210704	38.60195012	38.67340489	36.39574153	25.48315972	7.998208013	19.69334922
15:07:43.329	0.145030708	0.15169545	2.193608772	4.285481983	11.48366537	11.486664	15.87110771	19.66321917	29.64168564	34.20967103	39.91335564	38.30053646	38.59917026	38.67008439	36.39101505	25.47897727	7.998855838	19.69064053
15:07:44.304	0.145475456	0.152629015	2.194194573	4.286943148	11.48657875	11.49129753	15.87357038	19.66650163	29.64489187	34.21350596	39.91607522	38.30043134	38.60153848	38.67198584	36.3913358	25.47977394	7.99913616	19.69206057
15:07:45.283	0.145577524	0.152627824	2.195129155	4.288526939	11.48829057	11.49357552	15.87723872	19.66936274	29.65142035	34.21879281	39.91873462	38.30604681	38.60292322	38.67474504	36.39500368	25.48361163	8.002372269	19.69615457
15:07:46.259	0.145731644	0.15246541	2.195720003	4.289734016	11.49068436	11.49487107	15.87805057	19.6723588	29.65574426	34.22420496	39.92537244	38.30839195	38.60723994	38.67907819	36.40095161	25.49114617	8.004247129	19.70129484
15:07:47.244	0.145302179	0.152634872	2.196659616	4.29036499	11.49326684	11.49753929	15.87928197	19.67409111	29.65842525	34.22456528	39.92455793	38.305971	38.60265783	38.67342356	36.39605939	25.48738869	8.003601901	19.69808162
15:07:48.208	0.145651832	0.152360122	2.197247971	4.292408823	11.49607712	11.50032516	15.88310928	19.67909203	29.6651632	34.23533606	39.93644322	38.32117804	38.61817778	38.6895637	36.41535969	25.50737219	8.011457347	19.71658629
15:07:49.193	0.145828636	0.15295322	2.198094062	4.293512888	11.49791275	11.50218002	15.88352025	19.68028544	29.66790582	34.23708085	39.93451939	38.31801361	38.6116571	38.68614029	36.40951401	25.5034889	8.010473788	19.71293843
15:07:50.163	0.14583461	0.15294174	2.198606571	4.294783508	11.50018266	11.50423698	15.88498479	19.68351767	29.67142075	34.23981559	39.93829024	38.31967748	38.61709648	38.68679363	36.41206883	25.5065244	8.012569668	19.71541851
15:07:51.148	0.145933003	0.153166941	2.199154414	4.296176681	11.50230165	11.50806332	15.88684875	19.68499731	29.67395518	34.24191215	39.93493556	38.31803848	38.61246302	38.68418468	36.4088277	25.50359658	8.012636575	19.71325077
15:07:52.122	0.145952322	0.15302854	2.200053611	4.297204149	11.50500538	11.5085846	15.88878253	19.68824598	29.67848728	34.24746056	39.94350323	38.32356135	38.61605508	38.68832854	36.4141713	25.50911969	8.014797092	19.71775279
15:07:53.093	0.146197196	0.153131115	2.2008871	4.298735392	11.50819033	11.51326364	15.89179387	19.69354921	29.68819234	34.25849074	39.9561475	38.33883176	38.63390648	38.70472228	36.43283986	25.52492613	8.021394875	19.7304564
15:07:54.073	0.14635765	0.15282892	2.201490558	4.300030024	11.5112363	11.51568465	15.89507153	19.6970162	29.68903892	34.26486639	39.96467393	38.34567976	38.63583044	38.70826161	36.43469289	25.5243127	8.02183193	19.72994635
15:07:55.055	0.146322244	0.153862792	2.202422579	4.301819635	11.51432945	11.52048049	15.8992238	19.70371598	29.7000225	34.28019545	39.97778097	38.36797297	38.66053705	38.72884596	36.45798383	25.54217655	8.028722442	19.74466949
15:07:56.026	0.146242466	0.152528967	2.203372325	4.303228211	11.51727821	11.52162643	15.9045035	19.70933901	29.70966573	34.29131609	39.99339797	38.37973506	38.6718165	38.73991783	36.46655992	25.54576412	8.030916571	19.74541081
15:07:57.001	0.14620306	0.152678706	2.204375131	4.304371737	11.5202121	11.52601251	15.90851774	19.71743689	29.72111239	34.30796249	40.01302389	38.40469485	38.69329566	38.76182015	36.48899244	25.55837537	8.036072295	19.75516609
15:07:57.982	0.146326476	0.154119906	2.204677811	4.306286184	11.52430591	11.52871973	15.9138709	19.72302525	29.73026116	34.32002301	40.02748264	38.42042375	38.70166128	38.77304459	36.49633181	25.55944556	8.036994308	19.75333852
15:07:58.962	0.146405849	0.154042389	2.206317514	4.30819187	11.5289045	11.5347713	15.92245617	19.73698229	29.7533552	34.34979797	40.07217169	38.46342037	38.75251242	38.82075789	36.5480352	25.59840019	8.050480689	19.7835248
15:07:59.931	0.146771835	0.153538677	2.207350661	4.309902693	11.53402287	11.53867599	15.92872917	19.74639385	29.76881846	34.37300406	40.09511272	38.49440469	38.78520101	38.85083765	36.5806758	25.62076599	8.057875914	19.79983821
15:09:15.406	0.152236977	0.15673059	2.255703857	4.394515039	11.6376961	11.64862698	15.88945749	19.68389107	29.6266605	34.0342595	39.43999132	37.75952798	37.95313798	38.03485896	35.89681512	25.45352611	8.07992642	19.78807615
15:09:16.381	0.152710579	0.158510437	2.257962966	4.39618969	11.64503101	11.65293726	15.8923524	19.69124029	29.6392725	34.05342473	39.45730899	37.79542178	37.97964091	38.06579812	35.93184498	25.48651329	8.0874162	19.81007183
15:09:17.349	0.152545551	0.158675716	2.259711549	4.398672514	11.6503381	11.65971989	15.90035208	19.70246202	29.66086494	34.07548356	39.48527619	37.8184751	38.00056341	38.09005902	35.95095919	25.49476156	8.090511664	19.81515602
15:09:18.325	0.152531673	0.158587191	2.260598295	4.40059027	11.65585178	11.66365281	15.90936969	19.71536734	29.67805586	34.10507457	39.52681698	37.86488668	38.03793559	38.13312927	35.99660688	25.52611475	8.097396627	19.83793719
15:09:19.310	0.152789398	0.158338322	2.261459764	4.402510208	11.66116767	11.66943993	15.91854043	19.7290639	29.69728965	34.13524309	39.56995059	37.90667832	38.07751574	38.17478144	36.04013693	25.55229083	8.10496897	19.8580437
15:09:20.273	0.152854263	0.159467364	2.262872207	4.405273374	11.66636851	11.67621606	15.92931238	19.74294584	29.71542863	34.16654817	39.60987204	37.9481706	38.12065082	38.21642597	36.07923428	25.57480548	8.112131859	19.87182176
15:09:21.260	0.153091302	0.159132751	2.264079924	4.407022476	11.6717021	11.68124847	15.93798893	19.75554797	29.74073683	34.19201932	39.6394169	37.97546332	38.1491905	38.24433973	36.0950886	25.57194602	8.110167345	19.86446368
15:09:22.236	0.153253266	0.158654091	2.264860519	4.409422064	11.6789012	11.68793346	15.95034706	19.7747165	29.77070864	34.23521222	39.6955089	38.03293663	38.21391798	38.30289636	36.14949371	25.60116226	8.12031726	19.8825778
15:09:23.207	0.153491972	0.159577342	2.266419545	4.412342911	11.68622429	11.69643367	15.96595682	19.796983	29.80057251	34.28757204	39.76871879	38.11340082	38.29105207	38.3784687	36.22581048	25.64868833	8.135170417	19.9148783
15:09:24.188	0.153092045	0.158944344	2.267862308	4.414775345	11.69447417	11.7044589	15.98121564	19.82031011	29.84352568	34.33855782	39.84249104	38.18632205	38.3640619	38.45289011	36.2968257	25.69043417	8.148041228	19.94316122
15:09:25.158	0.153886637	0.158669757	2.269140796	4.417361098	11.70223116	11.71314128	15.99593094	19.84181893	29.88382702	34.38864818	39.9061408	38.25398267	38.43685722	38.52519427	36.3631494	25.72567744	8.159120605	19.96663195
15:09:26.148	0.153736627	0.159433517	2.27053048	4.41962269	11.70844728	11.71996935	16.00959354	19.86115563	29.91578785	34.43238312	39.96365287	38.3106588	38.49617826	38.58190631	36.41108769	25.74348495	8.163358685	19.97382353
15:09:27.122	0.153507869	0.158632467	2.271927752	4.422734074	11.71608322	11.72643312	16.02368121	19.88126694	29.95252019	34.47723122	40.02019577	38.37210361	38.54933461	38.64246747	36.46516369	25.77043811	8.172049143	19.98900648
15:09:28.091	0.153796626	0.159741774	2.273249204	4.424919027	11.7236749	11.73397692	16.03586637	19.89994717	29.98769536	34.52068418	40.07599106	38.43559072	38.6028203	38.69970626	36.51429131	25.7929218	8.178635085	20.00096285
15:09:29.077	0.154207174	0.159490335	2.27456054	4.427789482	11.73074702	11.74066835	16.04988476	19.92069813	30.02019582	34.56666501	40.13663859	38.49475927	38.67364192	38.76529285	36.57865527	25.82891147	8.190333254	20.02524122
15:09:30.045	0.154375145	0.159591303	2.275619146	4.429981004	11.73715801	11.74746395	16.06132372	19.93880588	30.05479288	34.60767846	40.19255789	38.54669827	38.73062133	38.81954256	36.62915241	25.85536229	8.197382694	20.04131949
15:09:31.029	0.154635543	0.160223872	2.277228711	4.432384957	11.74429212	11.75505323	16.07595981	19.95735123	30.08335425	34.64870137	40.24440686	38.60580561	38.78824994	38.8768663	36.68417499	25.88929181	8.206063036	20.06108166
15:09:32.006	0.1540878	0.159695486	2.277994139	4.434666266	11.74997105	11.76063214	16.08602987	19.9711487	30.11118326	34.6801953	40.28642186	38.646151	38.82040994	38.91863673	36.72091359	25.90607045	8.21097931	20.07165134
15:09:32.978	0.154463313	0.159242557	2.279502613	4.436989191	11.75587137	11.76669252	16.0953587	19.98715179	30.12970023	34.71504755	40.32591138	38.69290886	38.8656752	38.9649122	36.76406556	25.93304586	8.21639536	20.0890834
15:09:33.963	0.154538193	0.160011454	2.280257927	4.439134702	11.76033122	11.77028053	16.10199427	19.99850786	30.15064555	34.73824742	40.35791957	38.72528261	38.89899449	38.99613276	36.7892072	25.94472362	8.219430519	20.09562312
15:09:34.927	0.154586044	0.160211882	2.281334224	4.440829059	11.7651837	11.77605466	16.10897093	20.00850033	30.16269493	34.76047371	40.38801478	38.74756026	38.92863267	39.02633104	36.81881517	25.95851643	8.224093811	20.10450036
15:09:35.914	0.154806404	0.160336852	2.282200741	4.442162021	11.76919193	11.78029327	16.11590791	20.01618598	30.17751964	34.77749038	40.41073888	38.7696301	38.95056295	39.0473822	36.84137656	25.97177516	8.230083043	20.11205617
15:09:36.893	0.15461802	0.16084509	2.283112753	4.444213359	11.77243864	11.78315261	16.11978113	20.02328241	30.19054817	34.79159225	40.42740846	38.79140393	38.9723866	39.06835656	36.86236002	25.99038463	8.237201777	20.12627149
15:09:37.857	0.155031905	0.160627097	2.28371896	4.445160873	11.77420363	11.78535489	16.12068453	20.02451984	30.19498916	34.79295584	40.42748164	38.79185878	38.96978737	39.06451454	36.85725681	25.98607125	8.235804931	20.12146681
15:09:38.833	0.154896907	0.1596923	2.284661301	4.446675625	11.77689543	11.78813617	16.12297151	20.02808061	30.19662432	34.79657571	40.42956722	38.79565779	38.97317794	39.06817401	36.86355758	25.9922008	8.239587527	20.12728941
15:09:39.825	0.154661811	0.160529782	2.285424194	4.447677868	11.77828842	11.78982437	16.1230396	20.02744893	30.19757356	34.79439694	40.42881635	38.78878789	38.96264422	39.05884145	36.85445057	25.98835675	8.237642487	20.12356233
15:09:40.797	0.155196821	0.160914551	2.286283133	4.449256137	11.78116323	11.79310012	16.12432346	20.03052147	30.20073499	34.79785838	40.43164382	38.79473399	38.97173969	39.06533358	36.8638423	26.00043847	8.243154267	20.13353474
15:09:41.767	0.155158586	0.160517358	2.286848899	4.450632913	11.7833503	11.79454116	16.12671424	20.03303842	30.20777386	34.80378171	40.43907051	38.80120323	38.97413951	39.07427887	36.87718393	26.01297249	8.249782337	20.14646316
15:09:42.737	0.155037935	0.160836963	2.28785948	4.452130147	11.78503263	11.79592365	16.12587321	20.03215439	30.2012301	34.79904142	40.42652034	38.78800807	38.96361515	39.06060215	36.86366911	26.00526757	8.248263167	20.1407757
15:09:43.728	0.155419794	0.160575237	2.288440402	4.452935276	11.78623081	11.79712389	16.12556575	20.0307314	30.19775457	34.79215493	40.41430186	38.77097341	38.94631917	39.04415675	36.84631533	25.99607544	8.246158754	20.13441861
15:09:44.693	0.155357869	0.160871692	2.288864637	4.453703195	11.78791316	11.79951483	16.12420094	20.02994843	30.19768603	34.78868577	40.41066171	38.76418549	38.9362122	39.03621188	36.84137484	25.9961562	8.247537606	20.13572864
15:09:45.674	0.155509828	0.160049223	2.289617423	4.455202608	11.78972237	11.80227006	16.12570217	20.03189284	30.19512002	34.79056941	40.40992559	38.76660225	38.93868205	39.03904542	36.84853356	26.0093897	8.252223563	20.14961615
15:09:46.655	0.155421878	0.160657771	2.290521849	4.456014315	11.79066083	11.80179827	16.12590375	20.03023423	30.19490516	34.78574867	40.40041818	38.7578524	38.9277038	39.0281098	36.84317048	26.0124538	8.25465611	20.15413499
15:09:47.630	0.15539866	0.160726153	2.290918279	4.456972766	11.79180003	11.80290097	16.12262155	20.02591551	30.18560944	34.77213693	40.37723321	38.73646768	38.89726131	38.99947068	36.81336994	25.99563343	8.248862817	20.14256256
15:09:48.600	0.15574615	0.161414439	2.291648322	4.458012257	11.79241974	11.80455671	16.12216102	20.0251325	30.18244206	34.7654343	40.36435549	38.72435183	38.88160404	38.9853933	36.80025112	25.99325216	8.249053631	20.14155284
15:09:49.586	0.155683893	0.160703436	2.292464289	4.459161241	11.79429977	11.80567889	16.12055396	20.0217902	30.17477296	34.7562684	40.349619	38.70988885	38.86060488	38.96590594	36.78145968	25.98534266	8.24640645	20.13613295
15:09:50.560	0.155500178	0.160556608	2.293148837	4.460446024	11.79614738	11.80768594	16.11971785	20.0217648	30.17986159	34.75256025	40.33884677	38.70111309	38.85329234	38.95843941	36.77672645	25.98672662	8.247610219	20.13975878
15:09:51.530	0.155781269	0.160793041	2.293866242	4.461163562	11.79643355	11.807546	16.11611448	20.0166885	30.16686566	34.73801908	40.31682422	38.67321937	38.82597083	38.9299581	36.7457207	25.96626802	8.240695349	20.12502966
15:09:52.505	0.15575438	0.161168372	2.294320801	4.46240673	11.79790628	11.80946846	16.11767504	20.0163432	30.1681385	34.73705612	40.31278946	38.67005159	38.82152567	38.9255241	36.74547098	25.97046389	8.242985776	20.13142083
15:09:53.492	0.155740172	0.162063283	2.295270716	4.463352028	11.80051833	11.81080533	16.11775799	20.01763093	30.17136174	34.73591043	40.30725073	38.66873088	38.81840923	38.92206907	36.74777321	25.98030541	8.246271503	20.14007267
15:09:54.467	0.156510764	0.161008469	2.295879442	4.465090168	11.80157487	11.81290346	16.11819681	20.0175045	30.16617472	34.73269006	40.30002775	38.65992226	38.81292102	38.91167059	36.73727905	25.97711963	8.245786347	20.13818061
15:09:55.442	0.156600662	0.162026846	2.296854635	4.466169074	11.80387113	11.81516424	16.12013293	20.01995405	30.16887367	34.73459712	40.30289445	38.66188364	38.81110177	38.9120195	36.73772628	25.98209356	8.248823468	20.14337844
15:09:56.417	0.156529061	0.161540489	2.297855101	4.467670677	11.80693482	11.81968261	16.12294864	20.02343062	30.17915795	34.74132526	40.31028769	38.6648466	38.81429258	38.91637074	36.74665233	25.99181248	8.252638809	20.1522498
15:09:57.392	0.156478482	0.162643745	2.298291967	4.469069343	11.80892114	11.82026482	16.12355053	20.02535824	30.17841113	34.74365199	40.3082342	38.66386921	38.81060807	38.91221562	36.74319694	25.98895306	8.253582191	20.15085922
15:09:58.367	0.156820972	0.161420886	2.299355616	4.470380403	11.81227704	11.82290945	16.12659356	20.02942408	30.18553486	34.74971079	40.31404637	38.66841706	38.81752936	38.9200563	36.75293584	26.00093123	8.259046236	20.16183138
15:09:59.337	0.157039335	0.161728479	2.29993907	4.472151396	11.81398592	11.82571024	16.12718065	20.02978595	30.18506551	34.74721695	40.30936953	38.66270228	38.81150268	38.91111941	36.74225759	25.99734511	8.256757382	20.15885602
15:11:15.392	0.164167571	0.167135041	2.359571729	4.568452838	11.9657499	11.98155042	16.19522734	20.08187059	30.21401875	34.63578675	39.98599128	38.29836716	38.39746651	38.50139983	36.4011089	26.01036112	8.322838215	20.24608654
15:11:16.372	0.163878217	0.167444974	2.360569217	4.570164024	11.97093577	11.98435875	16.19906158	20.08654278	30.21322611	34.64616749	40.00224404	38.31134239	38.41323148	38.51810012	36.42165218	26.03135602	8.328056539	20.26286682
15:11:17.348	0.163889187	0.167783198	2.361473197	4.572311046	11.97495281	11.98956776	16.20389896	20.09124867	30.21463825	34.65205745	40.00837105	38.31459185	38.41458385	38.51912062	36.41932897	26.02814519	8.32683039	20.25890156
15:11:18.326	0.163930856	0.16752132	2.362746162	4.573424335	11.97658788	11.99037226	16.20552439	20.09152672	30.22072954	34.64820522	39.99822646	38.30124913	38.39884153	38.50550812	36.39980274	26.00679805	8.321804341	20.2416244
15:11:19.307	0.164037262	0.167477191	2.363382241	4.57457485	11.979318	11.99353189	16.20585021	20.09188891	30.2166915	34.64541879	39.99000315	38.28986448	38.38376657	38.49163893	36.37895272	25.98979002	8.317295779	20.22584999
15:11:20.281	0.164297167	0.167739973	2.364748718	4.576870798	11.98292771	11.99688672	16.21203166	20.09974311	30.22796312	34.66110754	40.00925361	38.30989307	38.40843901	38.51419075	36.40704202	26.01271738	8.325400397	20.24626032
15:11:21.261	0.163892689	0.168334518	2.365159866	4.578376109	11.98717496	12.00082706	16.21657253	20.10758042	30.23698365	34.67857621	40.0369503	38.33995473	38.43736831	38.5418009	36.44016695	26.04394513	8.333873104	20.27268086
15:11:22.234	0.164374833	0.167603712	2.366268557	4.579579196	11.98955385	12.00446164	16.22113319	20.11152871	30.24595035	34.68364974	40.04214621	38.34208225	38.44087324	38.54714575	36.44360172	26.04848585	8.336061196	20.27638073
15:11:23.208	0.164552315	0.168641468	2.36744043	4.581419599	11.99280051	12.00583867	16.22391493	20.11463519	30.24737793	34.68843963	40.04328896	38.34597546	38.4430579	38.548133	36.44415759	26.05026708	8.338389555	20.27750749
15:11:24.185	0.164284318	0.16774521	2.368013327	4.582524124	11.99493145	12.00758002	16.2265484	20.11624327	30.24959943	34.68730927	40.03982087	38.34112686	38.43894995	38.54396	36.438143	26.0454758	8.337670445	20.27457123
15:11:25.162	0.164700056	0.167222726	2.369129594	4.583985634	11.99711257	12.01109098	16.22679517	20.11860895	30.25556735	34.69003481	40.04074026	38.34358928	38.44042527	38.54481303	36.44097309	26.04953866	8.34016819	20.279475
15:11:26.142	0.164282565	0.167517221	2.369490194	4.585243459	11.99974232	12.01382772	16.22834646	20.11917317	30.25357983	34.68746389	40.03777024	38.33848169	38.4362963	38.539202	36.43467925	26.04793206	8.340094241	20.27863676
15:11:27.117	0.164327905	0.168524963	2.370399223	4.586742202	12.00142757	12.01502908	16.22859819	20.11896299	30.25384337	34.68383874	40.02830827	38.3300743	38.42684187	38.53122931	36.42803861	26.04702919	8.341089542	20.27928927
15:11:28.089	0.164825732	0.168236516	2.371161671	4.587555449	12.00298	12.01717381	16.23044106	20.1200997	30.25286587	34.68455739	40.03031041	38.3286538	38.42585266	38.53062335	36.43182179	26.05723827	8.345620369	20.28855398
15:11:29.071	0.164859392	0.167588874	2.371572814	4.588979716	12.00512568	12.01993657	16.23161185	20.12073125	30.24864281	34.68225851	40.02464481	38.32361753	38.41966896	38.52526843	36.42965963	26.06097336	8.349022711	20.29398407
15:11:30.040	0.164770922	0.167903944	2.372274608	4.589819247	12.00562735	12.01993435	16.22872086	20.11565558	30.24227704	34.66638592	39.9989786	38.29270115	38.38701017	38.49460792	36.39604685	26.03857774	8.342795125	20.2777269
15:11:31.022	0.165047843	0.168359597	2.373196265	4.590636857	12.00720336	12.02187737	16.22826098	20.11334087	30.23727542	34.65744144	39.98392191	38.27688314	38.36826348	38.47802021	36.38023562	26.03127746	8.342509309	20.2734221
15:11:31.996	0.16507483	0.168146592	2.373814653	4.592334895	12.00837208	12.02358619	16.22868566	20.11230575	30.23258234	34.65078853	39.96972544	38.26575336	38.35481375	38.46416418	36.36461243	26.02418025	8.339451936	20.26899765
15:11:32.976	0.165274335	0.168243911	2.375021896	4.593399987	12.00999827	12.0244167	16.22838886	20.11159046	30.23284577	34.64438461	39.95781051	38.25008993	38.33573899	38.44528144	36.3408866	26.00536908	8.335136769	20.25322594
15:11:33.952	0.165225574	0.168977312	2.375698409	4.594550498	12.01315341	12.02685418	16.23091856	20.11515148	30.23594607	34.65004751	39.96627856	38.25837826	38.34207368	38.45244236	36.35116873	26.01555174	8.337831357	20.26072916
15:11:34.921	0.165675348	0.169696997	2.376865222	4.596114946	12.01703467	12.03065791	16.23637855	20.12219755	30.24802707	34.66131327	39.98111529	38.27303768	38.35800383	38.46804011	36.36544511	26.02846984	8.342676466	20.27193012
15:11:35.900	0.165585542	0.169645151	2.377541731	4.597756031	12.0218486	12.03513172	16.24172978	20.1288058	30.25915196	34.67691018	39.9988952	38.28757985	38.37626392	38.48568651	36.38438434	26.03799913	8.34648537	20.28042046
15:11:36.878	0.165581495	0.16923412	2.378799519	4.599786952	12.02475875	12.0386817	16.24736761	20.13581812	30.26748634	34.68964929	40.01072048	38.30280418	38.39646547	38.50111535	36.39849544	26.04885769	8.350564588	20.28746224
15:11:37.848	0.165738288	0.168769944	2.379693382	4.601355775	12.02780765	12.04162664	16.2506929	20.14121426	30.27390915	34.6974786	40.02121544	38.31048803	38.40201499	38.50848863	36.40146666	26.05081532	8.351931007	20.28868445
15:11:38.838	0.1660696	0.169179292	2.380448226	4.603069113	12.03096864	12.04591826	16.25548074	20.14708164	30.28971288	34.70929794	40.03779357	38.32583124	38.41780232	38.52332467	36.41729196	26.06553221	8.357255627	20.29954056
15:11:39.807	0.166188018	0.169099163	2.381276379	4.604418927	12.03428613	12.04885019	16.25876156	20.15065953	30.29253577	34.71421275	40.03966483	38.33209589	38.42147723	38.52531568	36.41717612	26.06134572	8.356667118	20.29523937
15:11:40.793	0.165970075	0.168758427	2.382458339	4.605880408	12.03787216	12.05151534	16.26270444	20.15543261	30.30216497	34.72202917	40.04714094	38.340019	38.42978185	38.53448021	36.42480846	26.06660892	8.358256065	20.29814949
15:11:41.762	0.165865588	0.169180639	2.383321872	4.607534642	12.04115128	12.0540309	16.26636574	20.16066039	30.30995218	34.72967696	40.05484212	38.34700413	38.43456605	38.54239941	36.43063468	26.07067309	8.359532337	20.30019757
15:11:42.737	0.166098461	0.170096614	2.384117164	4.609164775	12.04380464	12.0590512	16.27096093	20.16615748	30.31589689	34.7409531	40.06691003	38.3674155	38.45180901	38.5558892	36.44957357	26.0860454	8.364635989	20.31186915
15:11:43.715	0.166433778	0.169220969	2.385235945	4.610527713	12.0477803	12.06229539	16.27544246	20.17219329	30.32804693	34.75207015	40.08506317	38.38614301	38.46761838	38.57177418	36.46732764	26.09855774	8.369448	20.32167151
15:11:44.696	0.16638535	0.169336284	2.386198031	4.612142504	12.05067567	12.06535741	16.28039833	20.17770716	30.33754514	34.76259718	40.09932702	38.39795004	38.48141895	38.58555246	36.47783887	26.10670558	8.372549939	20.3273711
15:11:45.666	0.166321572	0.168691242	2.387268799	4.614144955	12.05497308	12.06970762	16.28572487	20.18480368	30.3497647	34.77659527	40.11836626	38.41842776	38.50083996	38.60789038	36.50030637	26.12428519	8.379183223	20.34119558
15:11:46.653	0.166269807	0.169102298	2.387985732	4.615943702	12.0588336	12.07288672	16.29003832	20.18940837	30.35986401	34.78517112	40.12544839	38.42257673	38.50731034	38.61454697	36.50287763	26.12260093	8.380044695	20.33763406
15:11:47.624	0.166418591	0.170517167	2.389104517	4.617584786	12.06228094	12.07733451	16.29546368	20.19711094	30.3702643	34.79961126	40.1470973	38.44334555	38.52508742	38.63681756	36.5269459	26.13975342	8.386964678	20.35118707
15:11:48.595	0.166749569	0.169519809	2.390107045	4.619256531	12.06615331	12.08009077	16.30073584	20.20432528	30.38373258	34.81131834	40.15951277	38.45992276	38.53754877	38.6505747	36.53989612	26.14807885	8.388839527	20.3555079
15:11:49.569	0.167009804	0.170195746	2.390975625	4.620582237	12.06878009	12.08466867	16.30438721	20.20980551	30.38996245	34.82248077	40.16925223	38.47049275	38.54536159	38.66240351	36.54996733	26.1522407	8.390064571	20.3576079
15:11:50.548	0.166820559	0.169765011	2.391904854	4.622567148	12.07234547	12.08654661	16.30937767	20.21548773	30.39860497	34.83270145	40.18040747	38.47787704	38.55422118	38.67110023	36.55170472	26.14702286	8.388548784	20.35159841
15:11:51.530	0.167178566	0.169878608	2.393109554	4.624273914	12.07723315	12.08990789	16.31623595	20.22436868	30.41419279	34.84980528	40.20148403	38.49812649	38.5774603	38.69520697	36.57497992	26.16241599	8.393617384	20.36188553
15:11:52.498	0.167357047	0.170992578	2.394379974	4.626250079	12.0810701	12.0968214	16.32382563	20.23373798	30.43088323	34.8683618	40.23198559	38.52280041	38.60629445	38.72280352	36.6011597	26.1797686	8.400051076	20.37409813
15:11:53.473	0.167302947	0.170499269	2.39504384	4.627575779	12.08544127	12.10065112	16.33014038	20.24295569	30.44751953	34.88825573	40.25412509	38.54693947	38.63557908	38.7482147	36.62522519	26.19403469	8.403978354	20.38265399
15:11:54.464	0.167050967	0.170707152	2.396392585	4.629696452	12.08927224	12.10403839	16.3364254	20.24862095	30.45962283	34.9004369	40.27039334	38.5641727	38.6504602	38.76176715	36.63605685	26.19525731	8.404795079	20.38016055
15:11:55.433	0.167327554	0.170263567	2.397397638	4.631536828	12.09449938	12.1099565	16.34342703	20.25965694	30.4777778	34.92314351	40.29530065	38.59970922	38.68730513	38.79637166	36.67272588	26.2211339	8.413168229	20.40047981
15:11:56.408	0.167486013	0.170650613	2.39840774	4.633528308	12.09826842	12.1127843	16.34722662	20.26537283	30.48550299	34.93338683	40.30901981	38.60896359	38.69861939	38.80835535	36.68059054	26.22163361	8.413892122	20.40031843
15:11:57.384	0.167672169	0.171899145	2.399329385	4.63506863	12.10223521	12.11653594	16.35430727	20.27403493	30.49821555	34.94932267	40.32980781	38.63491686	38.72171964	38.83247304	36.70576855	26.24016086	8.420521359	20.41569485
15:11:58.372	0.168034178	0.171728999	2.400582093	4.636455628	12.10590384	12.12015742	16.3581809	20.27968335	30.50829152	34.9605853	40.34783343	38.64630855	38.73713475	38.84710624	36.71964044	26.24602232	8.423430907	20.41922485
15:11:59.339	0.167965062	0.170753953	2.401508799	4.638175548	12.10918589	12.1240522	16.36373964	20.28713335	30.51712689	34.97394764	40.36443864	38.66248332	38.75421729	38.86346989	36.73296071	26.25557537	8.426648289	20.42602211
15:12:00.325	0.167828206	0.170569239	2.402033651	4.639864777	12.11294603	12.12661324	16.36883874	20.29202419	30.52438928	34.98458664	40.3789298	38.67262656	38.76542644	38.87620895	36.74506891	26.26620092	8.431024261	20.43370747
15:13:15.838	0.175370484	0.17841122	2.469067725	4.748163426	12.31024991	12.32972527	16.55485719	20.49570859	30.79135338	35.21923884	40.56012067	38.82556445	38.90059951	39.01739853	36.89673145	26.4735756	8.554212312	20.61766533
15:13:16.818	0.17554245	0.176985078	2.469775673	4.750812971	12.31658128	12.33305849	16.56210269	20.50388493	30.80117488	35.23447659	40.58150365	38.84558448	38.92157731	39.0366853	36.90767134	26.47227204	8.553699082	20.6162147
15:13:17.790	0.175874242	0.177654988	2.471363074	4.753537007	12.3235296	12.34002828	16.57319227	20.51862637	30.82621037	35.26448676	40.61525761	38.88407893	38.96331019	39.07505187	36.94034571	26.48958432	8.5587392	20.62524524
15:13:18.774	0.175847344	0.177997421	2.472695207	4.755606194	12.32883677	12.34478606	16.5817567	20.52963024	30.84346064	35.28660477	40.64550839	38.91209672	38.99239668	39.10583052	36.96770453	26.50468832	8.564828659	20.63389393
15:13:19.739	0.175801765	0.177570005	2.474181534	4.757820001	12.33427115	12.35163885	16.59134451	20.54309266	30.86583	35.31617341	40.68966604	38.95063047	39.03206684	39.1446657	37.00854398	26.52793907	8.571702597	20.65247171
15:13:20.725	0.175871962	0.177911583	2.475066359	4.760191379	12.33979075	12.3555704	16.60058564	20.55503892	30.88969994	35.34156691	40.72260334	38.99113791	39.06222485	39.18229226	37.04383305	26.5510832	8.579947221	20.66794744
15:13:21.694	0.176281162	0.177456732	2.476342923	4.761960606	12.34407108	12.3619482	16.60794996	20.56478102	30.904832	35.35905006	40.74415767	39.01218705	39.08287008	39.20550036	37.06150058	26.55950174	8.582789636	20.67213725
15:13:22.664	0.176058074	0.178428416	2.477346554	4.763672888	12.34861994	12.36621177	16.61410376	20.57169519	30.91615675	35.37234986	40.75842899	39.0259018	39.09605143	39.21744858	37.06673639	26.55539453	8.580971192	20.66552372
15:13:23.657	0.176440909	0.176876236	2.478628114	4.765890926	12.35401542	12.3710734	16.62260343	20.58431417	30.93429184	35.40006568	40.79888916	39.06978742	39.14270409	39.26175423	37.11600674	26.59386647	8.59374772	20.69470672
15:13:24.620	0.176868459	0.179115862	2.479548363	4.767498118	12.35777934	12.37581846	16.62885625	20.59107715	30.94629531	35.41320755	40.81618988	39.08607623	39.1560971	39.27743452	37.12725095	26.59667479	8.593911739	20.69554454
15:13:25.605	0.176531924	0.178668732	2.480554482	4.769297913	12.36153106	12.37761626	16.63335926	20.59672794	30.95431989	35.42214034	40.82301125	39.09334902	39.16385366	39.28418857	37.12867787	26.59251297	8.592031055	20.68922462
15:13:26.572	0.176409602	0.178373336	2.481623818	4.771189768	12.36586154	12.38155458	16.63877198	20.60537583	30.96757129	35.43913565	40.84159563	39.11358376	39.18615604	39.30559168	37.14866375	26.60411251	8.595258434	20.69782194
15:13:27.553	0.176737384	0.178245975	2.482915505	4.773302731	12.36973136	12.38773042	16.64560702	20.61319811	30.98075957	35.45386153	40.85925277	39.12733333	39.20269047	39.32105522	37.15888127	26.60696563	8.595935448	20.69741131
15:13:28.525	0.176938376	0.17876073	2.483896377	4.77505659	12.37420043	12.39092704	16.65120725	20.62031391	30.98678155	35.4647231	40.87202167	39.13930922	39.21291872	39.33270106	37.16562281	26.6059136	8.594512297	20.69429904
15:13:29.504	0.177038602	0.17855021	2.484705389	4.776578283	12.37750658	12.39506027	16.65508789	20.62505597	30.9913771	35.47034636	40.87403265	39.14052477	39.21725267	39.33404385	37.15782125	26.59318687	8.590981187	20.68158624
15:13:30.485	0.177229916	0.178594309	2.485759523	4.778702185	12.38221453	12.39985047	16.66215999	20.63373657	31.0044881	35.48848401	40.90198687	39.16677504	39.24464748	39.3613559	37.18763467	26.61690544	8.598365089	20.69939988
15:13:31.472	0.177243388	0.179031917	2.48710173	4.780985916	12.38650328	12.40314437	16.67054106	20.64516038	31.02313939	35.51117758	40.9295922	39.19909815	39.2820749	39.39561506	37.22519136	26.64417866	8.609085927	20.72274091
15:13:32.445	0.177236511	0.178798246	2.488355518	4.78266968	12.39159795	12.40873482	16.67843351	20.65365618	31.03684441	35.52852261	40.95194981	39.21880784	39.30483616	39.41897509	37.24777085	26.65737831	8.613513441	20.73309317
15:13:33.414	0.177820539	0.17780928	2.489442525	4.784180458	12.39618212	12.41260147	16.6838855	20.66274127	31.05209103	35.54617416	40.9721712	39.24337239	39.32642789	39.44413989	37.27178904	26.67401037	8.619722016	20.74423029
15:13:34.388	0.177552075	0.179438551	2.490385476	4.786229921	12.40083702	12.41752835	16.69234601	20.6725498	31.07050439	35.56674941	40.9997522	39.27573607	39.35761096	39.47615173	37.30649584	26.69940727	8.629060379	20.76462618
15:13:35.367	0.177669649	0.17865277	2.491758017	4.788441408	12.40488386	12.42237056	16.69828172	20.68038868	31.08070213	35.58111184	41.01820796	39.29450347	39.37435443	39.49192571	37.31699028	26.70391285	8.630369087	20.76579696
15:13:36.340	0.17746825	0.179345	2.492519016	4.790311298	12.40889538	12.42646478	16.70545275	20.6894734	31.09599431	35.59912509	41.04138402	39.31831304	39.39448669	39.51323555	37.33657679	26.7132541	8.633323053	20.77188993
15:13:37.312	0.178515388	0.180240418	2.493939583	4.792270973	12.4143412	12.43188605	16.7143134	20.70072941	31.11064686	35.62240934	41.07049846	39.34920843	39.42816879	39.54525799	37.36590288	26.72958347	8.6405101	20.7834714
15:13:38.297	0.17799568	0.179200011	2.494758675	4.794237153	12.41951232	12.43596052	16.71996719	20.70969553	31.12448886	35.63927559	41.0876677	39.36791862	39.44470984	39.56324571	37.37845848	26.72980395	8.640531188	20.7796252
15:13:39.266	0.178059203	0.179738784	2.496189352	4.796118	12.42401083	12.4407378	16.72778546	20.72091794	31.14206993	35.66252593	41.11837498	39.39764869	39.48011647	39.59474482	37.40653247	26.74648431	8.645782809	20.79112595
15:13:40.258	0.178106039	0.179709162	2.497362215	4.798320645	12.42911982	12.44697831	16.73684779	20.73158354	31.15752165	35.68501315	41.14874956	39.42696053	39.51020996	39.62396598	37.43214062	26.75935079	8.650239001	20.79895728
15:13:41.228	0.178430813	0.180313953	2.498396136	4.800486163	12.43535065	12.45166448	16.74581706	20.74485921	31.17783812	35.71209429	41.1844636	39.45792098	39.54970088	39.66178902	37.46844536	26.78066366	8.655923415	20.81347169
15:13:42.209	0.178219403	0.180043418	2.499632195	4.80204503	12.43929112	12.45625938	16.75355571	20.75382535	31.19403052	35.72718086	41.20292398	39.47470158	39.56408104	39.67591257	37.47538935	26.77557511	8.653243512	20.80604422
15:13:43.180	0.178183497	0.180107237	2.50055492	4.804676977	12.44481952	12.4619668	16.76182828	20.76582164	31.21408464	35.75383071	41.23599581	39.51586353	39.59891586	39.71488149	37.51396526	26.80192115	8.661534693	20.82515381
15:13:44.152	0.179024095	0.180300514	2.501674751	4.806172374	12.44959237	12.4658853	16.76919174	20.77426641	31.22788882	35.7702899	41.25601752	39.53794483	39.61834798	39.73635612	37.53227381	26.80895677	8.664573928	20.82862343
15:13:45.127	0.179041572	0.179721334	2.502716234	4.808248068	12.45430613	12.47139747	16.77657976	20.78451191	31.2438041	35.79132787	41.28594847	39.56588484	39.64380951	39.7662368	37.56182722	26.83101815	8.670309732	20.84262187
15:13:46.107	0.178649991	0.181154323	2.504230264	4.810428846	12.45866859	12.47672739	16.78391815	20.79499271	31.26457364	35.81174149	41.31014972	39.58785919	39.66973137	39.79336544	37.58810907	26.84596505	8.675346097	20.85238797
15:13:47.082	0.179049832	0.180604292	2.505211094	4.812395039	12.46352989	12.48074338	16.79061447	20.80363914	31.27809211	35.82881187	41.33117296	39.61056007	39.69400673	39.81526153	37.60592864	26.8544016	8.680125504	20.85765408
15:13:48.073	0.179256818	0.181158519	2.506320766	4.814315164	12.46798362	12.4855722	16.7983723	20.81285687	31.29425206	35.84691117	41.35887797	39.63430668	39.72211147	39.84158494	37.63260033	26.87432852	8.68611877	20.87275595
15:13:49.046	0.179366383	0.180668499	2.507306652	4.815821488	12.47137524	12.48908081	16.80217856	20.81869253	31.30244568	35.857566	41.37236393	39.64292474	39.729697	39.84884967	37.63548737	26.87162079	8.685412462	20.86934476
15:13:50.025	0.17957237	0.18093037	2.508497212	4.817807359	12.47639284	12.49435216	16.81007512	20.82881973	31.31760488	35.87597289	41.40035276	39.6718902	39.7593387	39.87597734	37.66524608	26.89448061	8.693241552	20.88611167
15:13:50.986	0.179771021	0.180847582	2.509604419	4.819999159	12.48023912	12.49573384	16.81436595	20.8343362	31.32737931	35.8833989	41.40836819	39.67717985	39.76470475	39.88177507	37.66482096	26.88989793	8.692057285	20.87997325
15:13:51.973	0.179698408	0.180691072	2.51046897	4.821542634	12.48465451	12.50184415	16.82121481	20.84138279	31.33847648	35.89736108	41.42325996	39.69128526	39.77947632	39.89825533	37.67765017	26.89687767	8.695378925	20.88557355
15:13:52.939	0.179698203	0.18120157	2.511828865	4.823421253	12.48768911	12.50632859	16.82681456	20.8483632	31.34354965	35.90900272	41.4382411	39.70094335	39.79257486	39.91133362	37.68703117	26.90206021	8.698330207	20.88957072
15:13:53.924	0.179632931	0.180550368	2.512814715	4.825231893	12.49217535	12.51042889	16.8327495	20.85625137	31.35914716	35.92533393	41.45328373	39.7204741	39.81036931	39.92955099	37.70459061	26.90996682	8.700702108	20.89548214
15:13:54.896	0.179832246	0.181650729	2.513838497	4.826906821	12.49690675	12.51378134	16.83683727	20.86294524	31.36874299	35.9354896	41.46438341	39.72717877	39.81734356	39.93467732	37.70302551	26.90272657	8.697426764	20.8850162
15:13:55.875	0.180299811	0.181720558	2.51478645	4.82915326	12.50215446	12.51933882	16.84600327	20.87401469	31.3881014	35.95771547	41.48762595	39.76052893	39.84933403	39.96482086	37.73570359	26.92338097	8.704161068	20.90136275
15:13:56.850	0.180217192	0.182778917	2.516057871	4.831399714	12.50809575	12.52477276	16.85641432	20.88720498	31.41025732	35.98796662	41.53365694	39.8074231	39.89039828	40.01372646	37.78813652	26.96577209	8.720169408	20.93515776
15:13:57.826	0.180174277	0.18154642	2.517579464	4.833396518	12.51241683	12.52880162	16.86386117	20.89654091	31.42866026	36.00447995	41.55199071	39.82746062	39.90947179	40.03433893	37.80486276	26.97347995	8.722087902	20.93915155
15:13:58.807	0.180512385	0.18279169	2.518555204	4.834668459	12.51502614	12.53391669	16.8669901	20.9013154	31.43273748	36.01045135	41.55684861	39.82464792	39.90814482	40.03279273	37.79269834	26.95539402	8.715422616	20.91991227
15:13:59.782	0.180179864	0.183177887	2.519475362	4.836737525	12.51989612	12.53860253	16.87350819	20.9112572	31.4456307	36.03019492	41.58351871	39.85080835	39.93282728	40.05831524	37.81649601	26.96796001	8.719443599	20.92916354
15:15:15.438	0.189743226	0.188354424	2.586336257	4.943646891	12.70117066	12.72012626	17.0035777	21.0155991	31.53461849	36.01756771	41.41440385	39.65098418	39.73481128	39.85195697	37.63998163	27.00564742	8.796663123	21.023148
15:15:16.407	0.188490343	0.189350683	2.587159678	4.945454629	12.70409178	12.72216157	17.00932288	21.02601745	31.55663879	36.0400061	41.45457508	39.68107313	39.76480943	39.88244925	37.67351841	27.02641639	8.806857057	21.03978505
15:15:17.392	0.188578936	0.190447262	2.589145208	4.948961047	12.71302762	12.7310372	17.02447744	21.04511201	31.58527379	36.08106807	41.5125664	39.74282753	39.82338644	39.93736991	37.72974318	27.06248861	8.819291057	21.06470683
15:15:18.371	0.188552766	0.189185813	2.590549646	4.95148886	12.71975687	12.73866457	17.03529199	21.06133095	31.60775712	36.11355726	41.54911723	39.78248893	39.85898809	39.98166851	37.76278263	27.07291952	8.824164254	21.06805486
15:15:19.341	0.188576305	0.189230285	2.591979435	4.954141663	12.72744279	12.74602597	17.0507798	21.08386087	31.64818212	36.16356376	41.62289429	39.85130879	39.92510608	40.05127192	37.82415739	27.10269212	8.832605898	21.08297572
15:15:20.326	0.188926787	0.188956635	2.594116522	4.95800269	12.73880653	12.75668971	17.07300996	21.11553765	31.70246875	36.23486581	41.71579975	39.9545758	40.03154792	40.15751668	37.92586908	27.1647036	8.852313669	21.12529843
15:15:21.295	0.189210881	0.190747759	2.595470496	4.96142835	12.74849568	12.76662634	17.09253174	21.1431639	31.74976898	36.2956527	41.79557062	40.03711998	40.1147865	40.23825036	37.99321501	27.19237292	8.861438152	21.13880086
15:15:22.274	0.18942091	0.189981927	2.597557083	4.965206248	12.76010159	12.77738787	17.11616455	21.17549686	31.80372419	36.36816582	41.89508207	40.13422208	40.21046258	40.33948584	38.08677063	27.23842359	8.875616187	21.16893253
15:15:23.243	0.189003076	0.18968084	2.599492162	4.968428223	12.77118011	12.78988653	17.13798656	21.20720944	31.86102535	36.43815704	41.98380536	40.22798423	40.31283441	40.43668758	38.17456292	27.2840019	8.888681311	21.19789179
15:15:24.228	0.189781918	0.190172905	2.601149122	4.971722043	12.78103854	12.79989936	17.15624937	21.23341557	31.90081891	36.49412421	42.05586501	40.30730781	40.38804474	40.50883093	38.23503145	27.30683313	8.894348431	21.20725702
15:15:25.197	0.189428472	0.189816084	2.603235769	4.974959284	12.79075664	12.8093802	17.17567547	21.26108922	31.94703471	36.55546866	42.13982749	40.39320966	40.47267906	40.59827172	38.31920411	27.35586096	8.908704318	21.23756498
15:15:26.176	0.189928078	0.19090151	2.604614837	4.977839381	12.79898379	12.81672048	17.19242269	21.28278741	31.98046774	36.60373385	42.20233203	40.4535754	40.53997711	40.66485203	38.37719381	27.38417109	8.917472816	21.25397802
15:15:27.146	0.190181144	0.191441592	2.606625644	4.980774401	12.80667761	12.82519301	17.20635181	21.3021831	32.01378897	36.64641949	42.26043459	40.51607151	40.60600351	40.72725498	38.4375738	27.41933808	8.928492783	21.27878995
15:15:28.131	0.190395841	0.191605247	2.607347707	4.983080677	12.81166159	12.83092629	17.21420398	21.31222113	32.02869632	36.66587565	42.28304388	40.53617685	40.62384786	40.7463173	38.45002169	27.41920341	8.929012331	21.27347981
15:15:29.107	0.190555826	0.190812837	2.608575179	4.984820088	12.8152685	12.83456632	17.2198358	21.32074764	32.04170593	36.68141835	42.30256907	40.55530621	40.64509311	40.76582046	38.46544059	27.42515089	8.929159042	21.27752736
15:15:30.083	0.190282447	0.191976289	2.609701578	4.98632084	12.81922941	12.83756899	17.22438613	21.32624615	32.05037204	36.6900746	42.31332572	40.56254144	40.65241364	40.77245379	38.46964993	27.42299409	8.930557375	21.2750818
15:15:31.058	0.190850775	0.192264276	2.610777448	4.988495932	12.82352373	12.84279573	17.23077337	21.33366236	32.06378953	36.70456373	42.33962093	40.58579942	40.67276628	40.79411424	38.49071929	27.44062247	8.935204964	21.28809271
15:15:32.027	0.190981403	0.192228144	2.611777577	4.989882971	12.82674464	12.84485601	17.23321159	21.33798518	32.06767688	36.70950924	42.3425708	40.58762043	40.67168982	40.79451321	38.48705973	27.43414154	8.933459466	21.281964
15:15:33.022	0.191013277	0.19138257	2.612676354	4.991389797	12.83035261	12.84996381	17.23854279	21.34384766	32.07551578	36.71925054	42.3534608	40.59542562	40.68314524	40.80402065	38.49512071	27.43617823	8.93477781	21.28400788
15:15:33.994	0.190770925	0.192335086	2.614004885	4.993691888	12.83578877	12.85450783	17.24755207	21.35546924	32.09359231	36.74586916	42.3852234	40.63297575	40.72013299	40.8457121	38.53937093	27.4716898	8.9479879	21.31097621
15:15:34.974	0.191039333	0.192376981	2.614979604	4.995952171	12.8414336	12.86039716	17.2563472	21.36666764	32.11351194	36.76825752	42.4152103	40.65938845	40.74867993	40.87464946	38.56608347	27.48348662	8.952494297	21.31948961
15:15:35.947	0.191296398	0.191514263	2.61648496	4.998720525	12.84776342	12.86610495	17.26717283	21.38071033	32.13484373	36.79831629	42.45368716	40.69751131	40.78891379	40.91723766	38.6053743	27.50491511	8.959830472	21.33281009
15:15:36.915	0.191606842	0.193328518	2.618116683	5.000867203	12.85407	12.87305512	17.2770809	21.39566236	32.160343	36.82889822	42.49586585	40.74069333	40.8303754	40.9582159	38.63836916	27.51834199	8.964659935	21.33909937
15:15:37.889	0.191302772	0.192138253	2.619293559	5.003587319	12.86083617	12.87987462	17.29161867	21.4151702	32.19356082	36.87150113	42.55485063	40.79860905	40.89253814	41.01671369	38.6924524	27.54684651	8.973880111	21.35762898
15:15:38.875	0.191403037	0.192231595	2.620571354	5.006026895	12.86873698	12.88722617	17.30473665	21.4337321	32.22360669	36.91062956	42.60939083	40.84990212	40.94305781	41.06741403	38.73429822	27.56449087	8.979552941	21.36570762
15:15:39.845	0.191926324	0.192829978	2.622733579	5.009075451	12.87747103	12.89631523	17.32127414	21.45517424	32.25925751	36.95562146	42.6653761	40.91008392	41.00653638	41.1300363	38.79102014	27.59457109	8.989349791	21.38618113
15:15:40.829	0.191601235	0.192534037	2.624036636	5.011874068	12.88515938	12.90497375	17.33509295	21.47582118	32.29206638	36.99966268	42.72210686	40.96669924	41.05585396	41.1888961	38.84119928	27.62111797	8.996718914	21.39856529
15:15:41.798	0.192106506	0.193671757	2.625693549	5.014587634	12.89344784	12.91243054	17.35070668	21.49652247	32.32940926	37.04519564	42.77717871	41.02897403	41.12011264	41.24762213	38.89458352	27.64942125	9.006053659	21.41577189
15:15:42.783	0.191824787	0.193026832	2.627426068	5.017935681	12.90154005	12.92078314	17.36572925	21.51790797	32.35880478	37.09094283	42.83769462	41.0948553	41.1814282	41.30991211	38.95119427	27.67706632	9.015716041	21.4337966
15:15:43.752	0.192537896	0.192964119	2.628956633	5.020270453	12.90862468	12.92794711	17.37882937	21.53605184	32.39021733	37.13047155	42.89183256	41.14421944	41.23999788	41.3649526	38.99996684	27.70111662	9.023105286	21.44950416
15:15:44.737	0.192380613	0.193571073	2.630158576	5.023025157	12.91519448	12.93409519	17.39028683	21.55237414	32.41058041	37.16356835	42.92894151	41.18768858	41.28367837	41.40768984	39.03744963	27.71695682	9.027793071	21.45890383
15:15:45.707	0.192311406	0.194136013	2.631562786	5.025125614	12.91916956	12.93982838	17.39822223	21.56052726	32.423953	37.17991693	42.95084882	41.20507386	41.29934724	41.42529846	39.04537838	27.71489868	9.027383428	21.45365095
15:15:46.685	0.192857707	0.193814349	2.632865841	5.027431647	12.92497284	12.94519015	17.40610643	21.57257934	32.44600459	37.20395866	42.98494348	41.23700821	41.32765644	41.46022233	39.082656	27.7417189	9.035374677	21.47330926
15:15:47.655	0.192966313	0.193799653	2.633714222	5.028711109	12.92764689	12.94710639	17.40834451	21.57395476	32.44418752	37.2041835	42.98135316	41.23297965	41.32793431	41.45581435	39.07354466	27.73250884	9.033030547	21.46569457
15:15:48.627	0.192974169	0.194052481	2.634587838	5.030502785	12.93143579	12.95138271	17.41336639	21.5812322	32.4556025	37.21660053	43.00008187	41.24507549	41.33977147	41.47414178	39.09658767	27.75455464	9.039915155	21.48449024
15:15:49.619	0.192928644	0.193449573	2.635612811	5.032112264	12.93424053	12.95420722	17.41482473	21.58285315	32.4605015	37.21710483	42.99934624	41.2482452	41.33791852	41.4726827	39.09898735	27.76068778	9.042376706	21.49079631
15:15:50.590	0.193216398	0.194013654	2.636233787	5.033271258	12.93587896	12.95480984	17.41432758	21.58074713	32.45470395	37.2077962	42.98167592	41.23261852	41.32457471	41.45702257	39.08214358	27.75210253	9.040583906	21.48440946
15:15:51.570	0.193538845	0.194634324	2.637410457	5.034508837	12.93763161	12.95702416	17.41505282	21.57905888	32.44736988	37.20037251	42.96806979	41.22157291	41.31223817	41.4412884	39.06457567	27.73941287	9.0370729	21.4745924
15:15:52.549	0.193382897	0.195584253	2.638258704	5.035674187	12.93925159	12.95953764	17.41534879	21.57837992	32.44803441	37.19375354	42.95502137	41.20569893	41.29974929	41.4253112	39.04525	27.72264848	9.032711986	21.46210394
15:15:53.517	0.193534872	0.194287675	2.639258644	5.037152836	12.94179582	12.96222111	17.41876187	21.58034429	32.44875874	37.19493082	42.95613959	41.20429114	41.29684229	41.42236262	39.04176703	27.71884117	9.031895277	21.45899781
15:15:54.493	0.193706528	0.193406959	2.640283752	5.039047217	12.94523603	12.96554752	17.42249901	21.58693043	32.46166366	37.2073214	42.97337101	41.21748566	41.31193908	41.44076272	39.06137889	27.73663284	9.038705644	21.47378303
15:15:55.482	0.193633314	0.193950457	2.641056079	5.041024457	12.95071922	12.96906128	17.42930866	21.59490816	32.47666249	37.22469515	42.99479247	41.24124902	41.33499655	41.46701002	39.08690517	27.75566827	9.046044577	21.48791628
15:15:56.442	0.193382292	0.194391065	2.642258187	5.043109638	12.95535246	12.97362438	17.43699292	21.60447492	32.48825898	37.24293665	43.01769713	41.26623318	41.35857034	41.49364881	39.11164353	27.77119076	9.0516954	21.49829288
15:15:57.425	0.194229166	0.194960286	2.643687401	5.045154847	12.96004847	12.97923215	17.44377881	21.61346287	32.50628505	37.25835482	43.03306181	41.28507731	41.37822394	41.51102847	39.12388678	27.77470171	9.054180687	21.50037715
15:15:58.393	0.193681567	0.195459197	2.64496519	5.046988053	12.96548318	12.98409348	17.45154499	21.62425419	32.52151699	37.27859336	43.06144226	41.31479931	41.41057571	41.53963679	39.1507927	27.78929481	9.060686477	21.51065649
15:15:59.384	0.194323938	0.196067001	2.645838513	5.049516821	12.97052345	12.99115027	17.46284041	21.63730825	32.54344755	37.30497367	43.09776645	41.35364754	41.44261392	41.57335894	39.18237753	27.80617723	9.066184321	21.52056441
15:16:00.355	0.194205023	0.19469926	2.64749519	5.052105151	12.97642085	12.99582914	17.47107448	21.64872018	32.56160918	37.32868374	43.12561196	41.37798661	41.46983197	41.60086166	39.20467302	27.81451792	9.068647947	21.52513463
15:17:15.859	0.202978405	0.202109953	2.724635742	5.177188586	13.21681333	13.24117828	17.72263349	21.93010425	32.93813715	37.70486976	43.48603083	41.68807065	41.77338205	41.91005241	39.47409582	28.05380059	9.219907344	21.73186119
15:17:16.849	0.203574815	0.204000922	2.724935546	5.178533223	13.21850099	13.2390511	17.72263486	21.93156972	32.94107073	37.69878512	43.47339045	41.67433355	41.76650909	41.89310833	39.45714953	28.03697926	9.21070076	21.71883917
15:17:17.821	0.204048143	0.204751625	2.725993184	5.180602447	13.22243621	13.24168258	17.7262095	21.93498601	32.94790683	37.70195772	43.47271611	41.67593349	41.76435084	41.89383062	39.45683686	28.03699895	9.210685817	21.72016543
15:17:18.797	0.203758269	0.204509521	2.72722762	5.182877388	13.22605874	13.24621855	17.73057838	21.93914155	32.95261913	37.70829776	43.4828528	41.6830382	41.77632252	41.90383809	39.4699821	28.05317841	9.215634531	21.73452619
15:17:19.778	0.203588478	0.204993585	2.727754782	5.183806202	13.22689722	13.24745224	17.72908502	21.93786796	32.94921473	37.70070951	43.46916759	41.66498775	41.75708225	41.88443067	39.44862215	28.03810865	9.211962886	21.72374464
15:17:20.751	0.204250267	0.204347676	2.729014483	5.185258175	13.23068494	13.25142923	17.73284214	21.94012443	32.9543197	37.70355384	43.46966387	41.66993255	41.75852309	41.88516386	39.45466872	28.04662047	9.215275913	21.73158142
15:17:21.724	0.203987415	0.204483662	2.73027418	5.186926833	13.23276513	13.2529621	17.73605647	21.94135565	32.95436271	37.70300395	43.47058529	41.66502312	41.75972327	41.88676344	39.454402	28.05058622	9.217136628	21.73635808
15:17:22.696	0.204680556	0.205124618	2.731432842	5.188435714	13.23583327	13.25681558	17.73671486	21.9432256	32.95704449	37.70395894	43.46800767	41.66602536	41.75632613	41.8842201	39.45469061	28.05295363	9.218688599	21.73880288
15:17:23.676	0.204257258	0.205011972	2.731909481	5.190099946	13.23829964	13.26010986	17.74027919	21.94593538	32.96224084	37.70651952	43.47180573	41.66666381	41.75976197	41.88686202	39.4569885	28.05749169	9.221625149	21.74195998
15:17:24.649	0.204218894	0.205149671	2.733118653	5.191689798	13.24237633	13.26275425	17.74440139	21.95157004	32.96887656	37.71676309	43.48240707	41.68216441	41.77516932	41.90080199	39.47145219	28.0662028	9.225067289	21.7502545
15:17:25.629	0.204375328	0.204264569	2.734428834	5.193723922	13.24699844	13.26773858	17.75058086	21.95932191	32.97862695	37.72964186	43.49760511	41.69585364	41.78825048	41.91558421	39.48235222	28.07216429	9.228185226	21.75296657
15:17:26.609	0.20470121	0.204490571	2.735233834	5.195775552	13.25170016	13.27152684	17.75686884	21.96779644	32.99392375	37.74538294	43.51285535	41.71593103	41.80991715	41.93659749	39.50111433	28.08189708	9.232930516	21.76004583
15:17:27.591	0.205022421	0.206276054	2.736392449	5.198278048	13.25690611	13.27763564	17.76518963	21.97823721	33.00621233	37.76543423	43.5399564	41.74270857	41.83895535	41.96195297	39.52732146	28.0963995	9.237700531	21.77049415
15:17:28.553	0.204894666	0.205663591	2.738207858	5.200137165	13.26169074	13.28334834	17.77251946	21.98773803	33.028273	37.78429991	43.56622346	41.76226327	41.85597211	41.98229272	39.54303636	28.1047384	9.240788798	21.77315664
15:17:29.539	0.205005398	0.205127424	2.739113865	5.202801593	13.26820891	13.28740294	17.78137288	22.00076668	33.0493536	37.81070876	43.6047233	41.79992946	41.89253964	42.0187427	39.57664105	28.12750603	9.250386064	21.789952
15:17:30.505	0.204852291	0.204848463	2.740550372	5.205361075	13.27284302	13.29292051	17.78979786	22.01139318	33.0609284	37.82929085	43.62879168	41.81857794	41.91211984	42.03876987	39.58978731	28.13059851	9.251575136	21.79061834
15:17:31.486	0.205572436	0.205433681	2.742037342	5.206865489	13.27805188	13.29941277	17.79707741	22.02161528	33.07636296	37.84867423	43.64796516	41.8388458	41.93108186	42.05909292	39.60565707	28.13868158	9.254141683	21.79455603
15:17:32.455	0.205499048	0.206117492	2.742892882	5.209177616	13.28267117	13.30222616	17.80352357	22.02961961	33.09004498	37.86223247	43.66475332	41.85002484	41.94062672	42.07197708	39.61221181	28.13922559	9.254560531	21.79386022
15:17:33.442	0.2056915	0.206168593	2.74427879	5.211132866	13.28678874	13.30786673	17.80933734	22.03602608	33.09910146	37.8749625	43.67878485	41.86280069	41.95442141	42.0844456	39.62074922	28.14068844	9.255098505	21.79361803
15:17:34.407	0.205669148	0.206470038	2.745134339	5.213256776	13.29134909	13.3114082	17.81418001	22.0435768	33.10927599	37.88735576	43.69250606	41.88153091	41.97125705	42.09994058	39.63708598	28.15294649	9.259999024	21.80207479
15:17:35.400	0.205293883	0.20622879	2.746419187	5.214776424	13.29457002	13.31467605	17.8203734	22.04875593	33.11865469	37.89701893	43.69886467	41.88804864	41.98024797	42.10908634	39.64488119	28.15645531	9.261475107	21.80633252
15:17:36.378	0.205526364	0.206288466	2.747704083	5.216521598	13.29841937	13.32028427	17.82590623	22.05482675	33.12633512	37.90657075	43.71026172	41.89970759	41.9903533	42.12285617	39.66010342	28.17130646	9.266196769	21.81618724
15:17:37.340	0.205812885	0.205946924	2.748408082	5.218249352	13.30115137	13.32259074	17.82735921	22.05587342	33.12890968	37.90671173	43.70728609	41.89704255	41.98562655	42.11659348	39.65354941	28.16615819	9.265961129	21.8122315
15:17:38.325	0.206507669	0.206056322	2.749213037	5.219777793	13.30361159	13.32512421	17.82928979	22.05802782	33.13156601	37.90752865	43.70679838	41.89790332	41.98763131	42.11654474	39.65380908	28.16906972	9.268635386	21.81490071
15:17:39.304	0.206193117	0.206456351	2.75019482	5.221043619	13.30585369	13.32665679	17.82955289	22.0575776	33.13046147	37.90293853	43.70032746	41.88981151	41.9779553	42.1077789	39.64484505	28.16191882	9.268329113	21.81044202
15:17:40.273	0.206283838	0.206928397	2.750974566	5.222521808	13.30829947	13.32910609	17.83273248	22.05971621	33.13170434	37.90408554	43.7013925	41.8869256	41.9798206	42.1090115	39.6470753	28.16808142	9.271513962	21.81742797
15:17:41.243	0.206750805	0.206936635	2.751804824	5.224030629	13.31013773	13.33061284	17.83420975	22.06010689	33.13059323	37.90186105	43.69500821	41.88330476	41.97338738	42.10300246	39.64234562	28.16368025	9.271454761	21.81550533
15:17:42.227	0.206605031	0.207170341	2.752963391	5.225434306	13.31332633	13.33363382	17.83559266	22.06316886	33.13331118	37.90388862	43.69406291	41.88437417	41.97281233	42.10292074	39.64235136	28.16784059	9.273976661	21.81847113
15:17:43.206	0.206611024	0.207212869	2.753591548	5.227002162	13.31571881	13.3370254	17.83820929	22.06443287	33.13608356	37.90474023	43.69504124	41.88193561	41.97213611	42.09843109	39.63905239	28.16623377	9.274938661	21.81783993
15:17:44.191	0.206631359	0.20752716	2.754649074	5.228784473	13.31919637	13.33889581	17.83963654	22.06710819	33.14032441	37.9074917	43.69692107	41.88672226	41.97298396	42.10252508	39.6433121	28.17236647	9.277927632	21.82251687
15:17:45.161	0.20713468	0.207650277	2.756161298	5.229984673	13.32199892	13.34255407	17.84328969	22.07116259	33.14350555	37.91366158	43.70285168	41.89315726	41.98229729	42.10967699	39.6510447	28.17887797	9.281351988	21.8290034
15:17:46.145	0.206856486	0.207811967	2.757117788	5.231727585	13.32519044	13.3454255	17.84632053	22.07514882	33.15197717	37.91844949	43.71040831	41.89736832	41.98647271	42.11634772	39.65969748	28.18393695	9.284359701	21.83443501
15:17:47.109	0.207205707	0.207635029	2.758124861	5.233518765	13.32785449	13.34894086	17.85032422	22.07811116	33.15887429	37.92399782	43.71455444	41.89757052	41.99070409	42.12097992	39.66324697	28.18850221	9.287225501	21.83725737
15:17:48.088	0.207231379	0.20779672	2.75870249	5.234926828	13.33076889	13.35237139	17.85321216	22.08055153	33.15710817	37.92475884	43.71236736	41.89983078	41.98843578	42.11959996	39.66209815	28.18781917	9.287665818	21.83827003
15:17:49.066	0.207269726	0.207843533	2.759861061	5.236580029	13.33264232	13.35480092	17.85440776	22.08220206	33.1619574	37.92674179	43.71263946	41.89703606	41.98609094	42.11497735	39.65634878	28.18453951	9.286975667	21.83362318
15:17:50.041	0.207778043	0.208373862	2.760615507	5.23808879	13.3357691	13.35617751	17.85701461	22.08481072	33.16446089	37.92797844	43.71312134	41.89454364	41.98498565	42.11407601	39.65316678	28.18071144	9.28608977	21.83114676
15:17:51.011	0.207572569	0.208218355	2.761647809	5.240035315	13.33858045	13.3600762	17.86058873	22.08787345	33.16620345	37.93057326	43.71182524	41.89113129	41.98099449	42.11112137	39.64506194	28.1723903	9.283673387	21.82324117
15:17:52.006	0.207975476	0.208304597	2.762957862	5.241835045	13.34242341	13.36450084	17.86483275	22.09441333	33.17481961	37.94300716	43.72690712	41.90397499	41.99462174	42.12600729	39.6596294	28.18184053	9.288050129	21.83261783
15:17:52.971	0.20819661	0.20864375	2.763990175	5.243945744	13.34666507	13.36807462	17.87107137	22.10145929	33.18657772	37.95627055	43.7481937	41.92447397	42.01327257	42.14596476	39.68111899	28.19874016	9.295103924	21.84555943
15:17:53.945	0.207990801	0.209005189	2.765022455	5.245793742	13.35042586	13.37141419	17.87516331	22.10648795	33.19333486	37.96398946	43.75444368	41.93532656	42.02180106	42.15300398	39.68584396	28.2008301	9.296673065	21.84668102
15:17:54.915	0.208407056	0.207970959	2.766282069	5.247311269	13.3546379	13.37556633	17.87949224	22.11276046	33.20383842	37.97448045	43.76571681	41.94682144	42.03614027	42.1660855	39.70065001	28.21225954	9.301980296	21.85613093
15:17:55.899	0.208610837	0.209478589	2.767162762	5.249100105	13.35849578	13.37929566	17.88495039	22.11859507	33.21111727	37.98584071	43.77849814	41.96478243	42.05444813	42.17781958	39.72155466	28.23117532	9.308358027	21.87107457
15:17:56.870	0.208391688	0.208746984	2.768296077	5.250072638	13.35987682	13.38120528	17.8845723	22.11737217	33.21263644	37.97886461	43.76815727	41.946265	42.034747	42.15027717	39.6995782	28.21359058	9.303826527	21.85769824
15:17:57.861	0.208696863	0.209548202	2.768797873	5.251178559	13.36201237	13.38284796	17.8842624	22.11636644	33.20865346	37.97540432	43.75921256	41.94015565	42.02535552	42.14060954	39.69160536	28.21023229	9.303260052	21.85624166
15:17:58.837	0.208979695	0.208865463	2.769552297	5.252505623	13.36403616	13.38448446	17.88534944	22.11739515	33.20816444	37.97217217	43.7563327	41.93334811	42.02237637	42.13505475	39.6876832	28.21044883	9.303652483	21.85683705
15:17:59.804	0.209157463	0.209951304	2.770811908	5.2538787	13.36665581	13.38723263	17.88706348	22.11852528	33.20698427	37.97218787	43.75373561	41.93346717	42.01858044	42.13348905	39.68769408	28.21396371	9.305854113	21.86078975
15:19:15.567	0.217387079	0.22260756	2.847705071	5.381430668	13.60717911	13.62830314	18.14294173	22.40992503	33.60539408	38.38492875	44.17463651	42.32977705	42.42248732	42.5489553	40.05709197	28.50477705	9.459727198	22.09339288
15:19:16.543	0.218550808	0.217927431	2.850173027	5.38246917	13.60919416	13.63082731	18.1420565	22.40494252	33.60183598	38.36920195	44.1433647	42.29920452	42.3835048	42.50259605	40.02057709	28.47360909	9.44875733	22.07189076
15:19:17.516	0.218633701	0.21871374	2.851454011	5.383938831	13.61069634	13.63315017	18.14003718	22.39947343	33.59634891	38.35463009	44.12094593	42.28055223	42.36573501	42.48013526	40.00943063	28.47609726	9.451716621	22.07956146
15:19:18.498	0.218875658	0.218128511	2.85197728	5.384918132	13.61092427	13.63218411	18.13480074	22.3906092	33.5748203	38.32859971	44.08471101	42.24618073	42.32473027	42.44368601	39.97349196	28.45802597	9.44570189	22.06765674
15:19:19.469	0.218966888	0.218827386	2.852298587	5.385917307	13.61000593	13.63149163	18.13048322	22.38245271	33.56547438	38.30869187	44.05228022	42.21478511	42.29556479	42.41497894	39.95153548	28.45604924	9.447698612	22.07001047
15:19:20.459	0.218715282	0.219279389	2.853251123	5.386417206	13.60962897	13.63092154	18.12368725	22.3737385	33.54478979	38.2832926	44.02167088	42.17821403	42.26061982	42.37114676	39.92231725	28.446084	9.444360977	22.06674651
15:19:21.424	0.218835863	0.219990266	2.853572469	5.386468904	13.60783828	13.63007995	18.11700309	22.36302983	33.52765746	38.25281499	43.97970771	42.13627494	42.21611205	42.33535242	39.87837197	28.42100838	9.437104107	22.05122498
15:19:22.410	0.219354268	0.2191513	2.853868407	5.387192079	13.60711956	13.62741753	18.11196374	22.35327508	33.51062683	38.22932937	43.94247391	42.09560893	42.18306365	42.29927079	39.84601516	28.40490797	9.433644087	22.04428727
15:19:23.382	0.219306433	0.218800943	2.855149371	5.388005207	13.60622772	13.62825221	18.10842568	22.34567333	33.49518448	38.20888014	43.91540544	42.06961294	42.15035567	42.26994475	39.82024891	28.39345195	9.431812893	22.03778358
15:19:24.366	0.21935263	0.219070359	2.855546336	5.388951619	13.60749336	13.62976205	18.10473817	22.34013582	33.48348312	38.19263308	43.8939855	42.04333785	42.12340232	42.24041355	39.79567919	28.3784254	9.428130228	22.03037546
15:19:25.330	0.219086041	0.220058121	2.85627175	5.390270379	13.60929086	13.63273522	18.10495961	22.33886898	33.48364341	38.18726062	43.88262872	42.03526902	42.114517	42.23137975	39.7910543	28.38186485	9.429823454	22.03458857
15:19:26.315	0.219735494	0.219477175	2.856921247	5.391488117	13.61031171	13.63254885	18.1033781	22.33714478	33.47623215	38.17690486	43.86807208	42.0152789	42.094388	42.21051649	39.76588439	28.36431891	9.424673865	22.02053087
15:19:27.291	0.219494907	0.219764592	2.858101144	5.392964221	13.61368582	13.63494941	18.10668557	22.33841242	33.47875692	38.17799577	43.86788003	42.01370843	42.09400376	42.21122083	39.76633665	28.3657843	9.425874193	22.02237227
15:19:28.266	0.219576458	0.219805986	2.858952739	5.394608834	13.61642902	13.63781141	18.1096084	22.34147767	33.48408814	38.18138239	43.87306761	42.01865292	42.09808047	42.21515501	39.77094725	28.36947005	9.427639263	22.02569449
15:19:29.235	0.219875437	0.220508299	2.860309455	5.396494253	13.61967671	13.64079071	18.11192039	22.34615662	33.48978238	38.18801641	43.88094435	42.02490413	42.10666144	42.22221049	39.77992615	28.37692414	9.430117476	22.03148121
15:19:30.227	0.220312784	0.220409113	2.861135663	5.397738099	13.62253089	13.64499687	18.11569422	22.3479924	33.49051091	38.19065	43.88193372	42.02737485	42.10752722	42.22214086	39.77972449	28.37546623	9.429601366	22.03053264
15:19:31.192	0.220089882	0.220404216	2.862340872	5.399785499	13.62607654	13.64882114	18.12081298	22.35527567	33.50345597	38.20079047	43.89316503	42.04056383	42.12443712	42.24188202	39.79524181	28.38808475	9.433363385	22.03929473
15:19:32.159	0.220305156	0.220644485	2.863141998	5.401911633	13.63021758	13.65148854	18.12591662	22.36180255	33.50778973	38.21244505	43.90683947	42.05313249	42.13727413	42.25800413	39.80426724	28.39202188	9.435570796	22.04181086
15:19:33.150	0.220081567	0.221189935	2.864245992	5.403971702	13.63601995	13.65808607	18.13424262	22.37193653	33.52597753	38.23329365	43.93110245	42.07992296	42.16754032	42.28546569	39.83340064	28.41253972	9.444261943	22.05517007
15:19:34.131	0.220515915	0.220727282	2.866082415	5.406789074	13.6405463	13.66347543	18.14296928	22.38255929	33.5431993	38.25454145	43.95847428	42.10734762	42.19129973	42.31345322	39.85597793	28.42335695	9.449511889	22.06178801
15:19:35.095	0.220766201	0.221503321	2.867363368	5.408630741	13.64625289	13.66760504	18.15106672	22.39387369	33.55910354	38.27680171	43.98789307	42.13396895	42.21090384	42.33384761	39.87502819	28.429714	9.451229739	22.06337582
15:19:36.079	0.22038289	0.219988844	2.868770439	5.410898775	13.65273952	13.67561946	18.16286532	22.40948444	33.58738639	38.30756736	44.02288902	42.17197536	42.2523268	42.37214094	39.90820503	28.4457431	9.456602149	22.07224058
15:19:37.059	0.220870253	0.220149396	2.870581591	5.414074994	13.66052647	13.68333512	18.17582325	22.42732973	33.61533169	38.34384005	44.06753891	42.22105467	42.30057884	42.41613888	39.94851999	28.46439203	9.462647796	22.08305763
15:19:38.025	0.221407977	0.220882576	2.871660481	5.417144204	13.66832303	13.69077209	18.19035605	22.44648748	33.64722438	38.3820056	44.11775635	42.26488038	42.34754293	42.47037355	39.9850523	28.47740761	9.465513252	22.08807678
15:19:39.001	0.221307114	0.220968548	2.873471645	5.42041017	13.67761363	13.70051531	18.2070968	22.47016154	33.68543263	38.43133674	44.18399855	42.32663074	42.41641137	42.53322345	40.04375242	28.50625846	9.475232153	22.10651209
15:19:39.981	0.221214585	0.222635264	2.875207011	5.423332494	13.6870189	13.70934846	18.22386146	22.49344815	33.72072551	38.48100452	44.24296367	42.39565289	42.47873985	42.59460518	40.09605177	28.52859769	9.481973291	22.11862052
15:19:40.962	0.221800974	0.222518075	2.877270655	5.426764645	13.69662155	13.71973455	18.24268228	22.51883383	33.76359719	38.53634637	44.31467688	42.46659039	42.55073254	42.67058695	40.16093708	28.56373138	9.493280972	22.14176454
15:19:41.939	0.221547387	0.221959407	2.878930265	5.429667288	13.70512177	13.72730709	18.25829284	22.53933198	33.79920486	38.57986304	44.3759672	42.52302772	42.60601195	42.73082431	40.20609867	28.58227933	9.498478314	22.15112753
15:19:42.915	0.221779313	0.221962229	2.880488861	5.433355505	13.71289674	13.7359843	18.27290712	22.55848625	33.82810128	38.61959191	44.42951278	42.56894099	42.65681559	42.77909985	40.24853442	28.60015378	9.503965235	22.16224014
15:19:43.885	0.221813837	0.222168215	2.882047492	5.4362823	13.72103167	13.74328419	18.2866836	22.57806124	33.86024297	38.6590171	44.47693051	42.61934807	42.70700742	42.83858365	40.29621462	28.62596091	9.512363026	22.17931587
15:19:44.870	0.22224649	0.222722245	2.883782779	5.438653016	13.72816624	13.74980338	18.29884039	22.59622227	33.88667581	38.69460312	44.52620202	42.67017409	42.75768128	42.88154865	40.3392912	28.64981778	9.520402953	22.19458449
15:19:45.838	0.222483086	0.223162259	2.885290904	5.441687033	13.73566733	13.75759062	18.31214827	22.61312641	33.91278274	38.73072647	44.56874375	42.71538143	42.80929349	42.92310122	40.38676244	28.67889172	9.530865138	22.21519945
15:19:46.823	0.222538935	0.223171085	2.886293836	5.444083977	13.74161077	13.76471402	18.32285978	22.62683591	33.93830761	38.75779839	44.60902802	42.75147548	42.84450523	42.96410041	40.42149986	28.70085212	9.538592231	22.22951192
15:19:47.799	0.22277252	0.222264373	2.888029165	5.446577339	13.747254	13.77131804	18.33273889	22.63994219	33.95903812	38.78514463	44.64804171	42.79009831	42.8826153	42.99794712	40.4550627	28.72341327	9.544818031	22.2434224
15:19:48.770	0.223106141	0.223107293	2.889259464	5.448307092	13.75261447	13.77614185	18.34065087	22.65086572	33.97719471	38.80833212	44.67900658	42.81462866	42.90619333	43.02851157	40.47652558	28.73111122	9.548271429	22.2481826
15:19:49.758	0.22314798	0.223286712	2.890312863	5.450885563	13.7574285	13.78155596	18.34993147	22.6608454	33.99053397	38.82692275	44.70212084	42.84034436	42.92816647	43.05596006	40.49539392	28.73755708	9.552418894	22.25061075
15:19:50.730	0.223121144	0.223819312	2.891871429	5.453214836	13.76360836	13.78725685	18.35792199	22.67376708	34.00935072	38.85316121	44.73582834	42.87158313	42.96795872	43.09467702	40.53094274	28.75612804	9.559780089	22.26640553
15:19:51.701	0.223467764	0.224095597	2.892773424	5.45539094	13.76861789	13.79216501	18.36698757	22.68559704	34.02845185	38.87532995	44.75862991	42.89848901	42.992348	43.11776171	40.55152657	28.76674333	9.563762359	22.2717844
15:19:52.673	0.223574303	0.224042699	2.894432987	5.457831782	13.7748684	13.79834665	18.37768023	22.69924052	34.04979682	38.90325177	44.79738045	42.93884089	43.02971979	43.15448009	40.58695856	28.78698455	9.56992341	22.28319167
15:19:53.655	0.223665828	0.223543176	2.895663175	5.460359966	13.78079989	13.80498901	18.3874838	22.71289874	34.07827914	38.93025344	44.82829716	42.97059305	43.06713663	43.18162937	40.61402564	28.79575065	9.572898286	22.28785457
15:19:54.624	0.223627989	0.223311112	2.897246987	5.462993387	13.78728337	13.81161908	18.40017863	22.72993494	34.09900162	38.96676649	44.8736862	43.01582499	43.11327796	43.22716737	40.65483819	28.8186106	9.580636318	22.30562717
15:19:55.609	0.224366046	0.224573239	2.898805422	5.465188891	13.79514252	13.81874849	18.41231891	22.74639689	34.13040293	39.0013734	44.9148386	43.05737292	43.15416853	43.27778806	40.69499615	28.83730074	9.586212491	22.31556406
15:19:56.582	0.224243508	0.224156867	2.900591208	5.468487406	13.80284313	13.82519627	18.42561941	22.76296156	34.16045453	39.03560005	44.9646667	43.10493425	43.19688477	43.31669889	40.72783831	28.8494104	9.590706537	22.32285255
15:19:57.569	0.224246998	0.224627754	2.901770827	5.47118174	13.81043671	13.83205904	18.43877489	22.78165629	34.18811865	39.07498629	45.01187954	43.15407058	43.24617871	43.36890267	40.77085714	28.87051823	9.598623629	22.33417462
15:19:58.535	0.224729984	0.225084921	2.903430387	5.473780137	13.81696435	13.84074233	18.45123272	22.79860799	34.2171491	39.10776744	45.05283619	43.1930397	43.28679495	43.41541414	40.80134554	28.88173162	9.603478508	22.33947284
15:19:59.509	0.224117966	0.224764561	2.904761602	5.476765679	13.82484159	13.84804758	18.46560751	22.81723738	34.24354799	39.14784687	45.10099451	43.2530467	43.33743313	43.46948597	40.85168854	28.90815415	9.612244362	22.35803683
15:21:15.136	0.236429756	0.239286095	3.013231966	5.661427914	14.28082312	14.30565444	19.20011943	23.801921	35.78062797	41.09805075	47.50395013	45.63432104	45.70398829	45.84842878	42.87614225	29.91909959	9.981705968	22.98893662
15:21:16.112	0.236231071	0.23614839	3.01400486	5.665078592	14.28758546	14.31324789	19.20784823	23.81166969	35.81177036	41.11812923	47.54254902	45.65696786	45.73781307	45.88301002	42.90265243	29.9397662	9.986820402	22.99978523
15:21:17.086	0.236385711	0.236103238	3.016166299	5.668182406	14.29401786	14.31985414	19.21715913	23.82266058	35.82721356	41.13400664	47.5601475	45.67139039	45.75297597	45.89672152	42.90948127	29.93648559	9.986614742	22.9958033
15:21:18.058	0.23688667	0.236808076	3.016888727	5.670389358	14.29871765	14.32364158	19.22313388	23.82903639	35.83413934	41.14623653	47.57372543	45.6791047	45.76342426	45.90759645	42.91760293	29.94269973	9.989246265	22.9991767
15:21:19.033	0.23677765	0.236876919	3.018318003	5.672292171	14.30317261	14.32820167	19.22949248	23.83705618	35.84395958	41.15889405	47.58820885	45.69549615	45.7796946	45.92426605	42.93186058	29.95172877	9.992732919	23.00550741
15:21:20.013	0.237039941	0.237046042	3.019267551	5.674267055	14.30778333	14.33333942	19.23503217	23.844672	35.85959981	41.1720235	47.5995429	45.70723342	45.79377554	45.93624455	42.94007074	29.95482566	9.994909844	23.00706373
15:21:20.990	0.237045912	0.236314329	3.020924002	5.676819483	14.31348744	14.33823703	19.24399225	23.85562803	35.87613167	41.19382773	47.6310033	45.73649886	45.81665967	45.97156493	42.96835517	29.9739209	10.00122686	23.02128623
15:21:21.976	0.23752518	0.23696001	3.022277404	5.679218585	14.31884019	14.34359507	19.25238905	23.86480307	35.89523321	41.21030823	47.6520923	45.75937877	45.83614666	45.99179616	42.98634493	29.98581201	10.00587784	23.02835358
15:21:22.933	0.237858817	0.237624561	3.023656334	5.681108585	14.32365576	14.34923446	19.25929201	23.87530981	35.91312272	41.22965825	47.67794183	45.78176953	45.86056753	46.01623136	43.00531578	29.99482034	10.0090433	23.03510459
15:21:23.920	0.237674454	0.237778249	3.025363145	5.683684818	14.32877554	14.35415716	19.26760464	23.88631356	35.93210037	41.24850927	47.70224739	45.80346055	45.88315895	46.034566	43.02383505	30.00332197	10.01243899	23.04135131
15:21:24.891	0.238058402	0.237662811	3.026262254	5.686044805	14.33503384	14.3604709	19.27740283	23.89826026	35.9505914	41.27445914	47.73494871	45.83987289	45.92281467	46.06730466	43.05758814	30.02573177	10.0189768	23.05765823
15:21:25.871	0.237790054	0.238196204	3.027615682	5.687654294	14.34038091	14.36563432	19.28464199	23.90834208	35.96619912	41.29183291	47.75244226	45.8574954	45.93861969	46.07916995	43.07124145	30.02955043	10.01935514	23.05878374
15:21:26.861	0.237872336	0.23815618	3.029145718	5.690219478	14.34580676	14.37129056	19.29453067	23.92035153	35.98449129	41.31480343	47.77812187	45.88364276	45.96752164	46.11051214	43.09437249	30.04203743	10.02261508	23.0656075
15:21:27.836	0.237996629	0.238693858	3.030297217	5.692246843	14.35013458	14.37446682	19.3005187	23.92739659	35.99430173	41.32737901	47.7913223	45.89090373	45.97679514	46.11250522	43.09663025	30.03731078	10.02317283	23.0612218
15:21:28.807	0.238209251	0.23859299	3.031373013	5.69456083	14.35588289	14.37902673	19.30771946	23.93704348	36.00611007	41.34310681	47.80809495	45.90800444	45.99133179	46.13801615	43.10601855	30.03814171	10.02346456	23.06000994
15:21:29.778	0.23843187	0.23805157	3.033029437	5.697229163	14.36109782	14.38591822	19.31727552	23.94924095	36.02799408	41.36685227	47.8354346	45.94104323	46.02310761	46.16787058	43.13342479	30.05770974	10.03052643	23.07407073
15:21:30.766	0.238594476	0.238516382	3.034609945	5.699426832	14.36741935	14.39288634	19.32646914	23.95977332	36.04838994	41.38886206	47.86245127	45.96690504	46.05367869	46.19395874	43.15727036	30.06977301	10.03639197	23.08355646
15:21:31.729	0.238836431	0.239014633	3.035584818	5.702051545	14.37165356	14.39773244	19.3344493	23.96990801	36.06281888	41.40637648	47.88997676	45.98998319	46.07738682	46.22001512	43.17960358	30.08513181	10.0424658	23.0967447
15:21:32.710	0.238813727	0.238862334	3.036887686	5.703538423	14.37620464	14.4021875	19.33868663	23.97691752	36.07357849	41.41614731	47.898179	45.99792347	46.08328944	46.22822039	43.18234228	30.0838168	10.04238179	23.09449514
15:21:33.690	0.238736363	0.238414337	3.037887619	5.705187178	14.37989831	14.40685042	19.34490982	23.98162817	36.07956925	41.42561347	47.90650559	46.00555769	46.0919915	46.2366033	43.18676545	30.08282599	10.04215428	23.09260882
15:21:34.664	0.239162282	0.239179135	3.03929152	5.707345704	14.38422588	14.40929257	19.35202569	23.99105533	36.09122164	41.44181228	47.93051897	46.02661017	46.1146099	46.26259716	43.20971588	30.09955159	10.0481665	23.10631844
15:21:35.648	0.239316553	0.238980551	3.040569088	5.709423076	14.38799873	14.41382522	19.35672551	23.99591596	36.0967731	41.45041804	47.9369371	46.03034642	46.11925898	46.26145878	43.20920016	30.09606806	10.04633612	23.10242807
15:21:36.620	0.239345183	0.238477708	3.041922502	5.711765352	14.39307182	14.41959267	19.36478261	24.00707161	36.11095227	41.47077263	47.9685346	46.06132374	46.14858902	46.29116494	43.24200124	30.12128975	10.05451478	23.11975404
15:21:37.601	0.239411133	0.238621964	3.042846663	5.713626207	14.39754607	14.42413194	19.37028094	24.01431543	36.1204439	41.48328625	47.98410397	46.07523715	46.15985856	46.30659364	43.25269794	30.12732428	10.05723175	23.12340593
15:21:38.559	0.239486105	0.239386764	3.04460411	5.715824376	14.40211035	14.42821174	19.37849761	24.02273856	36.13462721	41.49794379	48.00272664	46.0925431	46.1752411	46.32602316	43.27032489	30.13799909	10.06201315	23.13071942
15:21:39.548	0.239874334	0.240020407	3.045906838	5.717610668	14.40702588	14.43367904	19.38260012	24.02996364	36.1468112	41.51064534	48.01835629	46.1087386	46.19134781	46.33853273	43.28503154	30.14517722	10.06619637	23.13571364
15:21:40.515	0.239855974	0.240247804	3.046300994	5.719681757	14.41096478	14.43582925	19.38737108	24.03650528	36.15652187	41.52153827	48.03104747	46.11716002	46.20170444	46.3533805	43.2904048	30.14660614	10.06653799	23.13585983
15:21:41.505	0.239981901	0.240612318	3.048083333	5.72200171	14.41674048	14.44256929	19.39895278	24.04752208	36.18131397	41.54432222	48.05756169	46.15088276	46.23212581	46.37640416	43.32153486	30.16663927	10.07497659	23.15319407
15:21:42.472	0.240348483	0.238852149	3.049159065	5.724092454	14.42159266	14.44680412	19.40450696	24.0554897	36.18688524	41.55589206	48.06956041	46.15963726	46.2448209	46.38655319	43.32873001	30.16707144	10.07465639	23.15285617
15:21:43.458	0.240200788	0.239695772	3.050512279	5.726165291	14.42600439	14.45193374	19.40917622	24.06149001	36.20225602	41.56585001	48.07873592	46.17046614	46.25368566	46.39265883	43.33199535	30.16498215	10.07404098	23.1502288
15:21:44.432	0.240433712	0.240886514	3.051890849	5.728282108	14.43028437	14.45576533	19.41492626	24.06906997	36.21468951	41.57874871	48.08830924	46.18186442	46.26598335	46.40203925	43.33720346	30.16581101	10.07483133	23.14802088
15:21:45.406	0.240524325	0.241823556	3.053092705	5.730722631	14.43562204	14.46131136	19.42435178	24.08092844	36.23293555	41.59916699	48.11692508	46.20401207	46.28977175	46.43142959	43.35846609	30.17847345	10.07855782	23.15684903
15:21:46.370	0.241027212	0.241109885	3.054420873	5.732920554	14.44177946	14.46770882	19.43249273	24.09035589	36.24339077	41.61794074	48.13802786	46.22215998	46.30717592	46.44988892	43.37080579	30.18368954	10.07972571	23.15967067
15:21:47.363	0.240986157	0.240644749	3.05605166	5.734785394	14.44608737	14.47298708	19.4381903	24.09786429	36.25528748	41.62793975	48.14535166	46.22902352	46.30898832	46.44704867	43.36733215	30.17265471	10.07739082	23.14951428
15:21:48.325	0.241294407	0.241439519	3.057379829	5.738164456	14.4537268	14.48006645	19.45263779	24.11541265	36.2768691	41.66379656	48.1941239	46.27519647	46.35780568	46.50632515	43.41376439	30.20462697	10.0885282	23.17260661
15:21:49.318	0.241569961	0.241726886	3.059035839	5.740492964	14.46040928	14.48549396	19.46216823	24.12909513	36.29870885	41.68980496	48.22770622	46.30756729	46.39480895	46.53640098	43.44223691	30.21947565	10.09359892	23.18285475
15:21:50.278	0.24162892	0.242430803	3.060061092	5.742747774	14.46676416	14.49062512	19.47161487	24.14025085	36.3182556	41.7129369	48.25813413	46.33294702	46.42109917	46.56016739	43.46426472	30.2291764	10.09727645	23.18918518
15:21:51.262	0.241662192	0.242140513	3.061439499	5.745238292	14.47117858	14.49662466	19.4785007	24.15031073	36.3308222	41.72923848	48.27594112	46.3509455	46.44117159	46.58002073	43.47481809	30.2347849	10.09911223	23.19149111
15:21:52.238	0.242012078	0.241211723	3.062641277	5.747689589	14.47648625	14.50163764	19.48678192	24.16064058	36.34695391	41.74806096	48.30144556	46.37203834	46.46344362	46.60109656	43.49010313	30.24288663	10.10233661	23.19632575
15:21:53.223	0.242322958	0.242471849	3.0640449	5.749191422	14.48016395	14.5067668	19.49161292	24.16727723	36.35736213	41.75844537	48.31369152	46.37957672	46.47031902	46.61382478	43.4960887	30.24338787	10.10257212	23.19527106
15:21:54.199	0.242025302	0.242233847	3.065246662	5.751115566	14.48456409	14.51050686	19.49808089	24.17366401	36.37137417	41.76960123	48.32563538	46.39514955	46.48145786	46.62587061	43.50740606	30.24862463	10.10412974	23.19963514
15:21:55.175	0.242516152	0.242604352	3.065943559	5.752985016	14.48810981	14.5136949	19.50206079	24.17946347	36.37816862	41.7802714	48.33751372	46.4080363	46.49175899	46.64066367	43.52167548	30.26123484	10.10751628	23.20793733
15:21:56.146	0.242335479	0.242975714	3.067296814	5.754578968	14.49137008	14.51749371	19.50659811	24.18331772	36.38342135	41.78553573	48.34486603	46.41662055	46.49796199	46.6501303	43.53066502	30.27058294	10.11268222	23.21587758
15:21:57.122	0.242131139	0.242304047	3.068094671	5.75597377	14.49257943	14.51796724	19.50492217	24.1807955	36.37945887	41.77564702	48.32777896	46.39761222	46.48322589	46.62913973	43.51128315	30.25571682	10.10933765	23.20610177
15:21:58.093	0.242624654	0.242834819	3.068993544	5.757128074	14.49415446	14.51991524	19.50570536	24.18069029	36.37274179	41.77359565	48.32540239	46.3940371	46.48067652	46.62849187	43.5114852	30.26132831	10.11226261	23.21060112
15:21:59.078	0.242709575	0.243687828	3.069766056	5.758295202	14.49505083	14.52046602	19.50422515	24.17883731	36.37187063	41.76421134	48.31210206	46.38260033	46.46984258	46.61278149	43.49934204	30.25470517	10.11232741	23.20900873
15:22:00.059	0.242975124	0.242816471	3.070437634	5.759495212	14.49684016	14.52229636	19.50449446	24.1759786	36.36660918	41.75581115	48.29916305	46.36732071	46.45397107	46.59382773	43.48650893	30.24868108	10.111371	23.20446041
15:23:15.842	0.253553436	0.2520735	3.165670212	5.914385822	14.83395776	14.86258013	19.9720147	24.75656887	37.22991474	42.78243995	49.49095654	47.51653792	47.59366803	47.75523323	44.44138282	30.7762994	10.3507394	23.56364391
15:23:16.828	0.254359565	0.254416315	3.165937767	5.917770204	14.84396844	14.87138801	19.98827443	24.78205463	37.28083701	42.81807267	49.54984875	47.57121523	47.6542895	47.80174264	44.49230348	30.79746706	10.36120357	23.57900432
15:23:17.809	0.254253801	0.254615442	3.168728968	5.922973893	14.85889155	14.88546704	20.01553373	24.81910912	37.34513278	42.81772369	49.65036692	47.66435504	47.74362948	47.89304514	44.57606431	30.83907149	10.37594882	23.60748672
15:23:18.784	0.254488204	0.254605528	3.170763136	5.92652244	14.869801	14.89632675	20.03634386	24.84664166	37.38589891	42.8694907	49.71930834	47.73770319	47.8200488	47.97185385	44.63984701	30.87569893	10.38849069	23.63211568
15:23:19.753	0.25506944	0.255812231	3.172444052	5.930372831	14.87890849	14.905934	20.05357039	24.87045321	37.42810107	42.90708075	49.7699337	47.79326054	47.87145756	48.02846319	44.68224668	30.89502876	10.39489993	23.64320851
15:23:20.737	0.255115271	0.254857285	3.174402396	5.933584417	14.88797655	14.91632548	20.06898248	24.89179661	37.46648432	42.93399235	49.8217609	47.84077965	47.92107988	48.07370603	44.72037359	30.91111728	10.40034268	23.65075196
15:23:21.712	0.255027497	0.255821492	3.1761337	5.936664973	14.89733376	14.92432231	20.08498655	24.9136278	37.49891653	42.97408212	49.87667584	47.89527037	47.97751191	48.12583737	44.76232992	30.92798013	10.40536431	23.66019105
15:23:22.678	0.255440482	0.255316392	3.178445502	5.94011959	14.90511896	14.93339074	20.10180415	24.93287885	37.52729283	43.02041282	49.9251742	47.9427491	48.02464365	48.1679577	44.79286094	30.94121183	10.41072573	23.66650319
15:23:23.666	0.255580935	0.255081979	3.179747646	5.943145174	14.91356216	14.9404842	20.11354214	24.95215825	37.55619041	43.06813075	49.97405517	47.98444244	48.06026166	48.21326055	44.82430029	30.95142404	10.41475402	23.67088932
15:23:24.644	0.255741043	0.256345148	3.181579827	5.946367729	14.92207079	14.94966193	20.12948595	24.9730489	37.5900929	43.10444913	50.0290947	48.03361062	48.10989294	48.26547444	44.86696634	30.9750796	10.42179151	23.68368441
15:23:25.609	0.255939798	0.256045672	3.183285953	5.949450593	14.92986173	14.95746445	20.14410724	24.99250033	37.62240355	43.15308963	50.07114331	48.08235955	48.15822555	48.31325792	44.90615942	30.99306448	10.42842704	23.69544847
15:23:26.594	0.255625801	0.255710173	3.185092805	5.952668588	14.93846394	14.9656354	20.15788328	25.01164526	37.64815517	43.19104972	50.10987348	48.1257507	48.20507978	48.35694327	44.94414181	31.00907585	10.43282123	23.7046424
15:23:27.565	0.255997142	0.256705173	3.186874553	5.955283376	14.94507343	14.97222353	20.16919486	25.02631701	37.67059705	43.22269951	50.14412043	48.15831442	48.23343072	48.39001322	44.96943531	31.01727679	10.43573265	23.70930079
15:23:28.541	0.256251539	0.256743214	3.187974892	5.957392965	14.95142631	14.97733778	20.17848702	25.03830519	37.68408418	43.24469167	50.16994189	48.18145974	48.25297356	48.40808441	44.98260549	31.01957736	10.43562711	23.70815674
15:23:29.527	0.256616553	0.256501095	3.189806936	5.960339756	14.95825547	14.98515794	20.19085925	25.05599058	37.71485131	43.28533338	50.22033619	48.22757379	48.30584292	48.45822853	45.0283498	31.04987316	10.44771034	23.73072458
15:23:30.493	0.256461477	0.256540873	3.190932596	5.962899933	14.96479446	14.99183712	20.19970962	25.06794699	37.73092651	43.31219017	50.24792878	48.25618231	48.33578101	48.49175283	45.05272255	31.06681063	10.45236823	23.74338699
15:23:31.468	0.257145339	0.25727882	3.192512384	5.964795221	14.96968957	14.99684094	20.20778552	25.07747052	37.74657639	43.32981644	50.27395721	48.28286663	48.36292233	48.51167055	45.07584531	31.08277401	10.45881686	23.75784624
15:23:32.449	0.256907971	0.257820563	3.193536936	5.966279319	14.97126549	14.99867677	20.20880582	25.0771526	37.74797081	43.32464619	50.26423719	48.26817546	48.34521469	48.50359913	45.05756057	31.06869642	10.45519541	23.74448112
15:23:33.433	0.257267989	0.257548465	3.19408199	5.967490038	14.97329762	14.99949332	20.20791555	25.07519124	37.73938403	43.31425288	50.24589247	48.25162514	48.32739334	48.48111886	45.04063393	31.05879906	10.45323455	23.73777568
15:23:34.409	0.257324481	0.256807801	3.194702828	5.968668117	14.9723738	14.99988856	20.2031523	25.06751555	37.72497016	43.29169467	50.21794617	48.22027958	48.29349604	48.45347713	45.01348269	31.03987091	10.44827723	23.72355293
15:23:35.374	0.257421286	0.257664816	3.195349009	5.969291059	14.97354741	15.00062212	20.20160053	25.06344641	37.72025649	43.27957418	50.20336864	48.2081459	48.28201792	48.43721834	45.0120505	31.04926742	10.45253796	23.7338652
15:23:36.360	0.257564074	0.258639127	3.196373487	5.969913565	14.97167176	14.99774533	20.19389693	25.05079026	37.69790019	43.24723428	50.16223222	48.16839266	48.24194418	48.40119515	44.97772935	31.03377058	10.44840274	23.72413843
15:23:37.327	0.257833466	0.257392225	3.196969169	5.969933005	14.96980337	14.99670032	20.18567958	25.03776976	37.67804387	43.21655064	50.11865823	48.12589895	48.20726984	48.35761735	44.94383471	31.02052036	10.44560424	23.71770629
15:23:38.312	0.257532128	0.258184921	3.196630994	5.970039531	14.9666999	14.9935121	20.17501785	25.02268374	37.65361757	43.17413052	50.07895181	48.08272843	48.1607522	48.31521261	44.90993055	31.00873243	10.44364348	23.71403573
15:23:39.292	0.257810185	0.258152694	3.19682279	5.970113363	14.96247197	14.99122647	20.16432754	25.00558763	37.62713769	43.12899584	50.03245196	48.0311598	48.10875138	48.25641488	44.86951028	30.99415936	10.44133622	23.7081645
15:23:40.264	0.258328796	0.256892112	3.196812795	5.969286561	14.95733181	14.98427477	20.14669288	24.97992821	37.58676181	43.07146095	49.9529746	47.95575648	48.03387843	48.18224472	44.79884672	30.95696911	10.4306784	23.68220894
15:23:41.240	0.257882524	0.257431258	3.197080333	5.969273022	14.95442344	14.98184022	20.13734745	24.96420812	37.556288	43.0311343	49.90282384	47.91198909	47.99378153	48.13973944	44.77133228	30.95217792	10.42962721	23.68569751
15:23:42.222	0.258066292	0.258574279	3.197145936	5.968874555	14.95039865	14.97754898	20.12427978	24.94699519	37.52837463	42.98595656	49.84651192	47.85753893	47.93828517	48.0871299	44.73319483	30.9414872	10.42725967	23.68331714
15:23:43.197	0.25768399	0.258317636	3.197615353	5.968605231	14.94646275	14.97327128	20.11181889	24.92623065	37.49606899	42.93935094	49.78196831	47.79429928	47.869826	48.02130516	44.67942013	30.91808342	10.42315746	23.67092251
15:23:44.171	0.258419168	0.257501655	3.197352997	5.968895641	14.94275662	14.9687146	20.09898424	24.90958999	37.4658813	42.89817091	49.73308704	47.74022306	47.82329317	47.96578313	44.63933123	30.90157328	10.42200061	23.66428823
15:23:45.146	0.258773524	0.258141855	3.197645774	5.969070151	14.94004573	14.96714346	20.09063395	24.89598319	37.44474478	42.88147287	49.69563686	47.70386883	47.78171784	47.92807423	44.61161341	30.89272725	10.42133001	23.66114461
15:23:46.117	0.258417208	0.258770061	3.198291862	5.969141983	14.93856007	14.96368395	20.08223028	24.88422123	37.42266656	42.85910498	49.65793596	47.66471566	47.74056948	47.89447351	44.58200958	30.88159353	10.42001559	23.65571965
15:23:47.102	0.258555	0.258555374	3.198710699	5.969554598	14.93684081	14.96415006	20.07524215	24.87168538	37.39258395	42.83198362	49.61949084	47.62029422	47.69857679	47.85244531	44.53929102	30.8572922	10.41177653	23.63859743
15:23:48.082	0.258713781	0.258529999	3.199356687	5.970535761	14.93664129	14.96470741	20.07265054	24.86679379	37.38801436	42.8157017	49.60052137	47.60728678	47.68358008	47.83334427	44.52873423	30.85645742	10.41209479	23.63940007
15:23:49.050	0.258720963	0.257741475	3.200305596	5.971823252	14.93775294	14.9648178	20.0698492	24.86356424	37.3779342	42.80690186	49.58417298	47.59281775	47.67161041	47.82374367	44.51832276	30.85229255	10.41238117	23.63856778
15:23:50.021	0.25878412	0.258271161	3.201077834	5.972706201	14.93974477	14.9663039	20.07172847	24.86437337	37.37690376	42.80933173	49.58516333	47.59230371	47.67030698	47.81604414	44.51901277	30.85810446	10.41489305	23.64400441
15:23:51.009	0.25918346	0.259215357	3.201799426	5.974080717	14.94220059	14.96933988	20.072468	24.86378763	37.38217985	42.81049065	49.5816989	47.58655705	47.66627972	47.81356622	44.51222977	30.85239011	10.41407146	23.63990476
15:23:51.986	0.259320252	0.258453379	3.202773458	5.976356211	14.94527551	14.97039715	20.07516827	24.86799776	37.38543477	42.81274847	49.58053515	47.58716457	47.66553851	47.81382807	44.5107051	30.85178038	10.41428818	23.63970122
15:23:52.960	0.259515683	0.259508936	3.203898914	5.97789278	14.95030278	14.97710752	20.08195925	24.87643202	37.39966609	42.82594505	49.60268822	47.60534589	47.68341117	47.83024291	44.53046583	30.86490617	10.41930598	23.64898989
15:23:53.930	0.25936727	0.259366236	3.205352434	5.980194626	14.95457358	14.98112473	20.09023722	24.88511842	37.41663661	42.84253717	49.62431544	47.62319605	47.69970015	47.85357381	44.5461974	30.87044433	10.42194665	23.65379548
15:23:54.917	0.259724297	0.259475309	3.206629138	5.982229377	14.95981477	14.98687999	20.09827611	24.89577859	37.43271132	42.85515199	49.64583378	47.64556864	47.72300919	47.87286627	44.56360034	30.88055458	10.42658454	23.65928137
15:23:55.890	0.260229921	0.259713743	3.207956445	5.984483033	14.96550447	14.99129928	20.10631218	24.90759807	37.4538908	42.87381668	49.67081378	47.68002042	47.75591273	47.90614969	44.59538367	30.89813356	10.43580007	23.67330867
15:23:56.857	0.260265758	0.259780033	3.209132408	5.986474444	14.97069989	14.99693908	20.11443275	24.91727344	37.46918946	42.88230232	49.69262369	47.69867919	47.77795869	47.92820852	44.61245149	30.90852386	10.43996826	23.6793765
15:23:57.847	0.260145003	0.259731502	3.210762316	5.988681807	14.97484836	15.00142192	20.12345518	24.92753017	37.48571474	42.90405896	49.71637342	47.72573434	47.80369084	47.95218731	44.63328311	30.91972704	10.4440797	23.68781456
15:23:58.822	0.260538347	0.259948511	3.212240972	5.991149631	14.98136808	15.00782036	20.13128383	24.93944918	37.50121717	42.91438941	49.74339632	47.75139997	47.83063026	47.98352018	44.65813044	30.93543837	10.44783118	23.69762545
15:23:59.796	0.260354951	0.260397618	3.213341141	5.99325454	14.98603287	15.01148007	20.1391322	24.94850241	37.51280066	42.93191344	49.76017661	47.76865452	47.84661256	47.99764149	44.66694729	30.93545081	10.44726235	23.69476413
15:25:15.307	0.270922486	0.272433174	3.294249367	6.121654875	15.22407427	15.25017673	20.3847797	25.22217782	37.87423645	43.33857181	50.09520677	48.0881581	48.17021341	48.31552656	44.94834596	31.14980265	10.59204815	23.88260754
15:25:16.292	0.271334396	0.271032521	3.295784979	6.123204457	15.22637801	15.25312089	20.38873709	25.22714126	37.88919513	43.33821451	50.11186203	48.0947961	48.17277763	48.32567298	44.95603395	31.15420337	10.59679265	23.88263616
15:25:17.262	0.271409807	0.272484673	3.297572936	6.1263674	15.23269752	15.25960179	20.39935271	25.2406168	37.91140058	43.36490891	50.15100878	48.13417487	48.20860782	48.36795053	44.99717249	31.19167642	10.61154587	23.91018152
15:25:18.243	0.271752418	0.271608159	3.298427353	6.12791263	15.2351073	15.26182576	20.40096803	25.24209555	37.91206123	43.36224164	50.1523856	48.13158255	48.20654037	48.36546104	44.99392731	31.18859371	10.61202296	23.90860096
15:25:19.213	0.271770524	0.271921242	3.299761171	6.129237148	15.23778816	15.26668442	20.40302667	25.24169852	37.91105191	43.35594687	50.14118208	48.12276983	48.19638282	48.35292473	44.98249065	31.17591623	10.60854707	23.89810198
15:25:20.189	0.272010852	0.271724741	3.300943587	6.131125605	15.24157871	15.26957683	20.40724518	25.2487232	37.9215801	43.3708173	50.15481683	48.13277237	48.20768869	48.36379153	44.99149282	31.18350119	10.61024982	23.90349807
15:25:21.179	0.272275497	0.271932492	3.302504396	6.133908025	15.24725595	15.27560951	20.41712171	25.26006951	37.93576345	43.3932819	50.18310863	48.16169165	48.23439157	48.39141489	45.01660377	31.20097841	10.61787795	23.91714104
15:25:22.143	0.27295261	0.272357769	3.303434552	6.135929901	15.25256872	15.28059804	20.42518365	25.2709148	37.95546984	43.40682394	50.21047418	48.18741815	48.26175241	48.41508637	45.03840711	31.21316548	10.62214623	23.92553069
15:25:23.126	0.272830449	0.272175832	3.30497015	6.138345115	15.25878481	15.28596898	20.43480455	25.28261327	37.97358679	43.42751984	50.23793334	48.21044857	48.29379191	48.44603852	45.06225344	31.22440326	10.62669312	23.93394317
15:25:24.096	0.272617003	0.272851199	3.306127347	6.140421588	15.26344682	15.29132721	20.44054858	25.28948738	37.98748098	43.43932518	50.24749835	48.2171112	48.29813228	48.45304782	45.06115174	31.21940853	10.62585449	23.92882343
15:25:25.075	0.272896975	0.272300127	3.307763871	6.142933002	15.26895351	15.29632835	20.450391	25.30148758	38.0031066	43.45077974	50.27582413	48.24676911	48.32681398	48.47825174	45.08509084	31.23044812	10.62948172	23.93655244
15:25:26.055	0.27306467	0.272799928	3.308895799	6.145123067	15.2729058	15.30059623	20.45587867	25.3093997	38.01505975	43.46517564	50.29258322	48.25945543	48.33919328	48.49080811	45.09084545	31.23136837	10.63079971	23.93579021
15:25:27.025	0.273050458	0.273456457	3.310330512	6.146650849	15.27785333	15.30424138	20.46008743	25.31515118	38.02413916	43.4777133	50.30156828	48.26874333	48.34703938	48.49472166	45.09538288	31.23293729	10.6313274	23.93627749
15:25:28.013	0.273258797	0.272883976	3.311260572	6.149151256	15.2822676	15.30767201	20.46736577	25.32363235	38.03349227	43.48714895	50.32137335	48.28439149	48.36804909	48.5175792	45.11388671	31.24775351	10.63723993	23.94707613
15:25:28.979	0.273618064	0.273726359	3.312518688	6.150641897	15.28537824	15.31359479	20.47076278	25.32718928	38.04445799	43.49051311	50.32776709	48.28991372	48.37215043	48.52321813	45.11957593	31.25422098	10.63980493	23.95235272
15:25:29.952	0.273685476	0.274053157	3.313398337	6.151999143	15.28796472	15.31463787	20.47107925	25.32530079	38.04133967	43.49352685	50.31940869	48.28409126	48.36570682	48.51614215	45.11446812	31.2536758	10.64140165	23.95305386
15:25:30.942	0.273769876	0.273446416	3.313949943	6.152967167	15.28741564	15.3150317	20.46917584	25.32121648	38.02605278	43.47226228	50.29930502	48.26221112	48.34380378	48.48647706	45.09501604	31.24243633	10.63905162	23.94684372
15:25:31.912	0.273871605	0.273258476	3.31480437	6.154221689	15.28902482	15.31551681	20.46654509	25.31708321	38.02308056	43.46193273	50.27996754	48.24191359	48.3245553	48.4742505	45.08206056	31.23781468	10.63925116	23.94503725
15:25:32.882	0.274069618	0.273416549	3.315356043	6.154713312	15.28821125	15.3156126	20.46101129	25.30837623	38.00405516	43.44208006	50.24657003	48.21340669	48.29046809	48.44507709	45.0556175	31.22469061	10.63647312	23.93861673
15:25:33.872	0.274255299	0.274073954	3.316311314	6.15541683	15.28713523	15.31482549	20.45601788	25.30038842	37.99178138	43.42991076	50.2206579	48.18701307	48.26485598	48.42108384	45.03588995	31.22120819	10.63703636	23.93964983
15:25:34.846	0.27390992	0.274209762	3.316106094	6.155919352	15.28581818	15.31362995	20.45029205	25.29086034	37.97784608	43.41335985	50.18599018	48.15612587	48.23235323	48.38691331	45.01460203	31.2189725	10.63788546	23.94171894
15:25:35.825	0.274346143	0.274242797	3.316632504	6.155796659	15.28176035	15.31059151	20.43903548	25.27407774	37.94942878	43.37586879	50.13112063	48.1063844	48.1848173	48.33632581	44.97439364	31.19861239	10.63356605	23.92919403
15:25:36.790	0.274298615	0.273152986	3.316503002	6.155059815	15.27650472	15.30430906	20.42451242	25.25245438	37.90916146	43.32290645	50.06772331	48.04092668	48.11976093	48.26948089	44.92047209	31.17154345	10.62804367	23.91337267
15:25:37.764	0.274173791	0.274092168	3.316297782	6.154526202	15.27188182	15.29830543	20.40979712	25.23066301	37.87394528	43.27100252	50.01159231	47.97574579	48.05757706	48.21151122	44.86700899	31.15116024	10.62371862	23.90201608
15:25:38.756	0.274397118	0.273990742	3.315915896	6.153854751	15.2650978	15.2931255	20.39349674	25.20540265	37.83469472	43.20930285	49.93982882	47.90930576	47.99251576	48.13745362	44.81393278	31.13398016	10.62092853	23.89423714
15:25:39.728	0.274419885	0.273863611	3.316089121	6.152720023	15.25920914	15.28640171	20.37517011	25.18094786	37.78921432	43.1520355	49.86526321	47.84013118	47.92515636	48.07073054	44.762612	31.11834619	10.61803643	23.88968131
15:25:40.693	0.274531942	0.274371129	3.315682101	6.151633437	15.25176341	15.27959375	20.35673069	25.15409791	37.74086796	43.09081386	49.78140676	47.76520049	47.84405636	47.99790777	44.70804861	31.09572847	10.61463421	23.87897081
15:25:41.672	0.274532053	0.273651316	3.315476865	6.150717258	15.24668417	15.27386909	20.34183832	25.12984396	37.70083019	43.02615334	49.71625747	47.69850911	47.78073236	47.93370473	44.65843028	31.08252962	10.61129104	23.87504412
15:25:42.658	0.274466529	0.274816625	3.315347293	6.149656761	15.23993862	15.26689201	20.32261579	25.10260762	37.65429868	42.96389267	49.64218572	47.61547478	47.6968112	47.85245502	44.59148014	31.05043633	10.6023041	23.8572482
15:25:43.634	0.274686527	0.274455677	3.315066381	6.149099098	15.23458572	15.26041477	20.30788113	25.08230784	37.62342271	42.91370363	49.58289898	47.55502971	47.63598086	47.78706015	44.5399307	31.02988038	10.59751007	23.84519483
15:25:44.609	0.275127745	0.273868613	3.315390969	6.148928352	15.23152015	15.25841471	20.2977274	25.06648131	37.59835022	42.88742914	49.53573182	47.51318146	47.59955363	47.74512302	44.51010827	31.02344483	10.5971925	23.84440766
15:25:45.590	0.275273446	0.274565428	3.315564162	6.149242837	15.22930225	15.25595384	20.28716998	25.05062097	37.57083937	42.85172134	49.48098383	47.46169855	47.54890392	47.696873	44.46433528	31.00186903	10.59151784	23.83042232
15:25:46.568	0.275216586	0.275585996	3.316166257	6.149601061	15.22739942	15.25455067	20.28153304	25.04173016	37.55372409	42.83020253	49.44753762	47.42860527	47.51591619	47.66107099	44.4390007	30.99409072	10.59075161	23.82809237
15:25:47.542	0.275638146	0.274938977	3.316692678	6.150127627	15.22617079	15.2538808	20.2776922	25.03453169	37.53844156	42.81582929	49.42112539	47.40261971	47.48640982	47.63965147	44.42094013	30.98912243	10.59050478	23.82678252
15:25:48.512	0.275260454	0.276451173	3.317597544	6.151270647	15.22687629	15.25284766	20.27334968	25.02828843	37.52595001	42.80415012	49.39061816	47.37383538	47.45705239	47.60992056	44.38856595	30.9685193	10.5844638	23.81305471
15:25:49.486	0.275372174	0.274525406	3.318578082	6.152175372	15.22931851	15.25610986	20.2745374	25.0292822	37.52857514	42.80795462	49.39154991	47.37502044	47.46289321	47.61303002	44.39575253	30.97662659	10.58781287	23.82020742
15:25:50.472	0.275167056	0.275127159	3.319407203	6.154559869	15.23222557	15.25931339	20.27857341	25.03340798	37.53644224	42.80736232	49.39990932	47.38423679	47.46702435	47.62219413	44.40436256	30.98378646	10.59141827	23.82657976
15:25:51.448	0.276073361	0.276196557	3.320286814	6.156185923	15.23573041	15.26251713	20.2821129	25.03885786	37.5410142	42.81577566	49.41331084	47.39892435	47.47636511	47.63309593	44.41437912	30.99219136	10.594902	23.83186772
15:25:52.424	0.275832597	0.275566664	3.321519627	6.157628357	15.23752789	15.26417659	20.28404838	25.03903058	37.54314074	42.81836271	49.40365383	47.38835235	47.46791298	47.62279663	44.40110557	30.97959156	10.59043017	23.82202824
15:25:53.399	0.275996955	0.275578288	3.322474924	6.159038007	15.24050581	15.26691965	20.28644148	25.04198432	37.54838736	42.81355726	49.40620024	47.39065049	47.46855113	47.62512092	44.40025985	30.97730795	10.59168841	23.82065125
15:25:54.368	0.27627059	0.276353908	3.324111416	6.160832413	15.2451029	15.27185595	20.29192472	25.04860726	37.556563	42.82876684	49.42854367	47.40786103	47.4864177	47.64243529	44.41752745	30.9896666	10.59736496	23.82927977
15:25:55.347	0.276322006	0.276312432	3.324890094	6.16293277	15.25007656	15.27667523	20.2988442	25.05869733	37.57379058	42.84338889	49.45132772	47.43124185	47.51545572	47.66675509	44.44176513	31.00711849	10.60437751	23.84327032
15:25:56.333	0.276433055	0.276507354	3.326425606	6.164552178	15.2527039	15.27978786	20.30300313	25.06238742	37.57747191	42.84426147	49.45184004	47.42722783	47.5093757	47.65908419	44.43136562	30.99414382	10.60109234	23.83078721
15:25:57.308	0.276658713	0.275546844	3.327204293	6.1668624	15.25789545	15.28410759	20.31005558	25.07128823	37.5911506	42.86349302	49.47500881	47.44626485	47.53317129	47.67904956	44.44584647	31.00090798	10.60493714	23.83473405
15:25:58.286	0.277131573	0.277213244	3.328739828	6.169655676	15.26301038	15.2903024	20.31812143	25.08243364	37.60919825	42.87875729	49.49629492	47.46920875	47.5540159	47.70276113	44.46405441	31.00692568	10.60789932	23.83872046
15:25:59.257	0.277295597	0.277257415	3.330300612	6.171939684	15.27007713	15.2970878	20.33020241	25.09785133	37.62996029	42.90087405	49.53959818	47.50945521	47.59528321	47.73785904	44.50299864	31.02741122	10.61655226	23.8539592
15:26:00.232	0.277103142	0.277844618	3.332113665	6.174853193	15.27799449	15.30419752	20.34267677	25.11656892	37.6574751	42.93413513	49.58818774	47.55962248	47.63620279	47.79182363	44.54516306	31.0494615	10.62422695	23.86935781
15:27:16.004	0.291768041	0.287625815	3.439010414	6.354679989	15.69631877	15.72349344	20.98656374	25.95015844	38.95872901	44.55994116	51.48476432	49.40325399	49.48521812	49.64334005	46.06316684	31.80556381	10.94477878	24.34705289
15:27:16.991	0.290499828	0.29013946	3.440165597	6.356552429	15.7011899	15.72927104	21.00118057	25.96704631	38.98099978	44.58071313	51.52686493	49.44276457	49.52259414	49.68131689	46.09809496	31.81927352	10.95057523	24.35520611
15:27:17.956	0.289982186	0.290803155	3.442380398	6.360698174	15.71102123	15.73905876	21.01708765	25.99028397	39.01803459	44.6284143	51.57981649	49.49622614	49.57678386	49.73260321	46.14029876	31.83763401	10.95583007	24.36611105
15:27:18.934	0.290862777	0.291054847	3.443787883	6.362529158	15.71614867	15.74472634	21.02530991	25.99914979	39.03114134	44.64394866	51.60021679	49.51457723	49.59802169	49.75319143	46.15498836	31.84426572	10.95972477	24.37092904
15:27:19.909	0.290743919	0.29042697	3.444514272	6.364338308	15.71882736	15.74827254	21.02850489	26.00481684	39.03843981	44.65516855	51.61673174	49.52391141	49.61107056	49.76245562	46.16684975	31.85186691	10.96470053	24.3775701
15:27:20.885	0.290635055	0.289778547	3.445694724	6.364849159	15.72029336	15.74902903	21.02718887	26.00065231	39.03339247	44.64138919	51.60578371	49.51697197	49.59769638	49.75048417	46.15771127	31.84617772	10.96386944	24.3735037
15:27:21.855	0.291012922	0.290992038	3.446244552	6.3662693	15.72064698	15.74907858	21.02789505	26.00082627	39.03027758	44.64150169	51.60091727	49.51127846	49.59495839	49.75075653	46.15835017	31.85159405	10.96665691	24.37844381
15:27:22.848	0.291314842	0.291426096	3.44747536	6.367907783	15.72283352	15.75156015	21.02816186	26.00081377	39.03260643	44.64183577	51.59975392	49.51131609	49.59891048	49.75381641	46.16546676	31.86055664	10.97135077	24.38804231
15:27:23.815	0.291491153	0.2906835	3.448151329	6.369262375	15.72500619	15.75474329	21.0300636	26.00217716	39.03212832	44.64198255	51.60028458	49.51725419	49.60217293	49.75610053	46.17075265	31.86756333	10.97480018	24.39341166
15:27:24.796	0.291244367	0.291091894	3.44928129	6.370417935	15.72791715	15.7578286	21.03383364	26.00737456	39.03981615	44.65463202	51.61726582	49.52943359	49.6201698	49.77032303	46.1896492	31.88335981	10.9803891	24.40582646
15:27:25.762	0.29158259	0.290898271	3.450285198	6.372321127	15.73180576	15.7604149	21.03767354	26.01192019	39.04346861	44.6554774	51.62103819	49.53269882	49.6204989	49.77177873	46.19012829	31.8828399	10.97990736	24.40491114
15:27:26.757	0.291977796	0.2918333	3.451541208	6.373972686	15.73484868	15.76379162	21.0401341	26.01468766	39.04434861	44.65938231	51.61958121	49.53195554	49.61503855	49.76915904	46.18052319	31.87247598	10.976778	24.39671348
15:27:27.728	0.292121795	0.291832347	3.452721664	6.37664298	15.73988791	15.76849913	21.04603472	26.02331931	39.0569963	44.66893516	51.63750896	49.54772197	49.63531462	49.78277687	46.19309808	31.87848774	10.97861712	24.39997795
15:27:28.695	0.292078226	0.292925	3.454053494	6.378941745	15.7460663	15.77459508	21.05574786	26.03556887	39.07781338	44.68804181	51.66041058	49.56815359	49.65725193	49.80517895	46.20753715	31.88343233	10.98124072	24.40280102
15:27:29.685	0.292348499	0.291247212	3.45578881	6.381808548	15.752135	15.78059286	21.06554299	26.04739742	39.09438785	44.70655876	51.6840858	49.59616494	49.67759793	49.8264572	46.22364659	31.88921551	10.98211963	24.40523057
15:27:30.656	0.292661742	0.292320999	3.457196286	6.384548759	15.75784228	15.78640317	21.07405056	26.05778739	39.10857532	44.71692246	51.70498089	49.6114015	49.6932185	49.84049421	46.23079319	31.88735299	10.98245059	24.4021435
15:27:31.625	0.292771093	0.293000849	3.45860377	6.387026705	15.7645974	15.79277144	21.08397982	26.07318511	39.13488563	44.74582935	51.74146498	49.64790172	49.72613933	49.88148805	46.26567653	31.90777157	10.99053363	24.41612777
15:27:32.603	0.292708541	0.292075868	3.459885072	6.388951594	15.7701543	15.79952211	21.09512831	26.08595244	39.15504057	44.7696426	51.77572632	49.68386926	49.7657996	49.91870006	46.30784653	31.93489399	11.0012107	24.43919462
15:27:33.580	0.293404918	0.292926953	3.461469084	6.39118466	15.77417778	15.8041579	21.09997557	26.09275754	39.16366309	44.77520594	51.79882509	49.70069022	49.78121885	49.93571701	46.32669618	31.94825568	11.00697568	24.4487281
15:27:34.551	0.293336032	0.293281368	3.46254861	6.392762091	15.77796305	15.80791159	21.10509375	26.09996512	39.1745396	44.78840811	51.81153107	49.71438196	49.79535646	49.94615147	46.34127011	31.95980548	11.0107643	24.45523451
15:27:35.538	0.293137556	0.293101386	3.463602822	6.394332807	15.78057049	15.80960171	21.1085482	26.10162761	39.17352021	44.79002687	51.81262042	49.71574575	49.79700194	49.94928914	46.34190139	31.96096865	11.01321552	24.45758373
15:27:36.505	0.293194935	0.292981405	3.464203077	6.396161613	15.78261054	15.81204507	21.1081377	26.101701	39.17501836	44.79151369	51.80896475	49.70995434	49.79296534	49.94613651	46.33738846	31.95776543	11.01280399	24.45546195
15:27:37.494	0.293837683	0.293671432	3.465736558	6.397465655	15.78478229	15.8138389	21.10910792	26.10242541	39.17700228	44.78378197	51.80586194	49.70255179	49.78404836	49.934669	46.32633636	31.94886876	11.01125579	24.44989205
15:27:38.456	0.293556573	0.292510201	3.466336835	6.399093423	15.78717567	15.81687926	21.11030625	26.10579854	39.17732141	44.7926821	51.80221443	49.70073869	49.7806653	49.93373867	46.32099752	31.94390349	11.00899452	24.44623059
15:27:39.444	0.293906476	0.294372486	3.467769412	6.401212698	15.79195806	15.82152103	21.1167365	26.11350672	39.19186434	44.79996701	51.81658736	49.71595143	49.79626376	49.94716085	46.33607072	31.95393345	11.01326053	24.45217039
15:27:40.411	0.293840587	0.29391084	3.46852101	6.402449185	15.7934006	15.82222575	21.11602101	26.11019709	39.18482639	44.79311761	51.79707712	49.69609284	49.77400668	49.9210305	46.3086071	31.93240051	11.00574484	24.43539088
15:27:41.401	0.294059894	0.294679608	3.469928343	6.404636182	15.79754421	15.82589433	21.12154107	26.11782126	39.19590529	44.80976339	51.81407218	49.71247745	49.79095383	49.94450465	46.32772685	31.9503529	11.01311569	24.44942281
15:27:42.372	0.294281192	0.294930372	3.470957393	6.406023428	15.80121753	15.8292976	21.125026	26.1213274	39.20350169	44.81324337	51.81834259	49.71898481	49.79833826	49.95028776	46.33866643	31.95993986	11.01796806	24.45773752
15:27:43.346	0.294420867	0.29399349	3.471784621	6.40758986	15.80284229	15.83222068	21.12515605	26.1212828	39.20048504	44.80555925	51.8134873	49.70960766	49.79124425	49.93912398	46.32902304	31.95363045	11.01781305	24.45471671
15:27:44.321	0.294867385	0.294251951	3.473116347	6.408732274	15.80510273	15.83234772	21.12539424	26.12148932	39.20093157	44.80528733	51.80833237	49.70924101	49.78644662	49.94040969	46.32931378	31.96036001	11.01963461	24.45913159
15:27:45.309	0.294641256	0.294317716	3.473918269	6.410431883	15.80699484	15.83532218	21.12725967	26.12207976	39.19915332	44.80705225	51.80729966	49.70566273	49.78649786	49.93784677	46.33321017	31.96738418	11.02389825	24.46600882
15:27:46.274	0.294912861	0.294781694	3.47441761	6.411320858	15.80737198	15.83550146	21.12427673	26.11655976	39.18931926	44.79163075	51.78691869	49.68557116	49.76182859	49.90953095	46.30931291	31.95099373	11.01902544	24.45477713
15:27:47.250	0.295345389	0.295437428	3.475471844	6.412817315	15.8092939	15.83869041	21.12379672	26.11551017	39.18896876	44.78459984	51.77897168	49.67826644	49.75727025	49.90739207	46.30592412	31.95166295	11.02019559	24.45698108
15:27:48.234	0.294798755	0.294925242	3.476500807	6.413749812	15.81013837	15.83995236	21.12488524	26.11556511	39.18582757	44.78224256	51.77974969	49.68029136	49.75664568	49.91154701	46.31106381	31.96112194	11.02459016	24.46501119
15:27:49.203	0.295231614	0.294372009	3.47705057	6.414938163	15.81071844	15.84062452	21.12167089	26.1114013	39.17777816	44.77187852	51.75559978	49.65607558	49.73090135	49.88948282	46.28636097	31.94378714	11.02030405	24.45399331
15:27:50.189	0.29579375	0.294719467	3.478407442	6.416417027	15.81332576	15.84251564	21.12343806	26.11214268	39.17827613	44.76765104	51.75169148	49.65419473	49.73146787	49.88802563	46.28802775	31.94971893	11.0233772	24.45914247
15:27:51.158	0.295297415	0.295015594	3.479007651	6.417804258	15.81487706	15.84389489	21.12188134	26.11000527	39.17508456	44.76350521	51.73758393	49.6428731	49.71685523	49.87465527	46.27365019	31.94221919	11.02286381	24.45467602
15:27:52.146	0.29574128	0.295570232	3.479733881	6.419307135	15.8160304	15.84542264	21.12179893	26.10855264	39.17170515	44.75673165	51.72589158	49.62787449	49.7057503	49.86095838	46.25995582	31.93637864	11.02104412	24.45154531
15:27:53.119	0.295945593	0.294964775	3.480889013	6.420598154	15.81784937	15.84682768	21.12128471	26.10532634	39.16537908	44.75398205	51.7130847	49.61859711	49.69391188	49.8455877	46.24658901	31.93200727	11.0214388	24.44982452
15:27:54.089	0.296361799	0.296483505	3.48169101	6.421742765	15.81967432	15.84866097	21.12127732	26.10642096	39.1669761	44.74653564	51.71009286	49.61175339	49.69029295	49.84368331	46.24741103	31.93886193	11.0246751	24.45638361
15:27:55.059	0.296240276	0.297030459	3.482644353	6.422642592	15.82021608	15.84890491	21.11838268	26.10014712	39.15112706	44.73413292	51.68363361	49.58897311	49.66571572	49.81730113	46.22448	31.92599804	11.02191969	24.44938515
15:27:56.049	0.296342648	0.296390712	3.483067864	6.423756406	15.82072774	15.85064664	21.11670159	26.09665129	39.14899631	44.72547808	51.67123838	49.57364736	49.65481443	49.80452112	46.2181668	31.92949492	11.0246812	24.45536383
15:27:57.018	0.296528305	0.295710796	3.484223006	6.42431092	15.8194919	15.85010568	21.11066405	26.08863601	39.13075726	44.70505542	51.63971039	49.54119269	49.625248	49.77313614	46.19693825	31.92490126	11.02527946	24.45507733
15:27:57.990	0.296813247	0.296285133	3.483713295	6.424791096	15.81787042	15.84708656	21.10155713	26.07398896	39.10503992	44.68084759	51.59553723	49.4994058	49.57861828	49.73270411	46.1652928	31.91461997	11.02362516	24.45085168
15:27:58.968	0.29657545	0.295380898	3.484515238	6.424812248	15.81495969	15.84247791	21.09106282	26.05714768	39.08083861	44.65114196	51.54098287	49.44820404	49.52070893	49.68439506	46.11773414	31.88913919	11.01630656	24.43620256
15:27:59.944	0.297157249	0.29547921	3.484510001	6.425027933	15.81271711	15.84115828	21.08373628	26.04471096	39.05689081	44.61947689	51.50468388	49.41097092	49.48567821	49.64453718	46.09052605	31.87935399	11.01600208	24.432271
15:29:15.444	0.310002357	0.306936853	3.586772975	6.593048202	16.18497713	16.20965122	21.60936357	26.71178227	40.08171854	45.8326222	52.90686536	50.74773563	50.81005737	50.97463077	47.17506709	32.45571642	11.2686722	24.81578114
15:29:16.412	0.310037586	0.309093225	3.58744642	6.594367025	16.18479677	16.21540853	21.61762414	26.71697831	40.08314258	45.81949422	52.91430527	50.74591665	50.8199641	50.9722073	47.18239461	32.4581041	11.27202352	24.81824646
15:29:17.387	0.31043758	0.31001365	3.58892687	6.59670622	16.18782623	16.21783836	21.61834133	26.71785444	40.08235941	45.81468534	52.90319855	50.73494324	50.80815315	50.95545195	47.1701863	32.44793146	11.26977393	24.81100416
15:29:18.357	0.310208639	0.309484163	3.590003823	6.59826537	16.19281262	16.22277185	21.62268279	26.72341842	40.09140293	45.82388468	52.91828683	50.75257737	50.82794704	50.97713825	47.19114038	32.46873472	11.27826307	24.8292801
15:29:19.349	0.310372434	0.309049672	3.590677071	6.599496415	16.19286056	16.22320326	21.62110212	26.71988967	40.08942113	45.8160988	52.90390259	50.73528586	50.80893434	50.95897497	47.17697317	32.46193373	11.2768328	24.82433725
15:29:20.319	0.310511927	0.309997484	3.591754016	6.600666592	16.19440726	16.22490692	21.619499	26.71649777	40.07794829	45.80691146	52.88964983	50.72018845	50.79692192	50.9445622	47.16800701	32.4577438	11.27555776	24.82342837
15:29:21.294	0.310852953	0.310828887	3.592528271	6.601727432	16.19266707	16.22399017	21.61443884	26.70880312	40.06465944	45.78709408	52.86457244	50.69455878	50.76674041	50.92208913	47.14187339	32.44173899	11.27126049	24.81300002
15:29:22.280	0.311092035	0.310451745	3.592924132	6.602608924	16.19376867	16.22363713	21.61267688	26.70484006	40.05996824	45.77244201	52.84902017	50.6816144	50.75168471	50.90544114	47.13260349	32.44015161	11.27225363	24.81370805
15:29:23.251	0.310983017	0.309679185	3.593647972	6.603248079	16.19381176	16.22308378	21.60859564	26.69853545	40.04945278	45.7554184	52.82865378	50.6633887	50.73003936	50.88723121	47.11639895	32.43372801	11.27184489	24.81046969
15:29:24.222	0.311363018	0.309905464	3.59442225	6.603732086	16.19394018	16.22317249	21.60473077	26.69333572	40.03951943	45.73597428	52.80859985	50.64468362	50.713132	50.87180337	47.10520413	32.43331056	11.27299264	24.81257287
15:29:25.207	0.31153181	0.310429588	3.594439808	6.604384142	16.19154338	16.2224628	21.59740316	26.68120406	40.01746811	45.71146007	52.76811847	50.60524547	50.6763889	50.83099207	47.06477529	32.40980899	11.26757137	24.79627945
15:29:26.177	0.31134551	0.310973404	3.59531497	6.605425369	16.19235153	16.22215595	21.59512659	26.67664069	40.00890605	45.70041589	52.75168178	50.59017143	50.6643626	50.8168457	47.05787838	32.41366063	11.26888087	24.80250609
15:29:27.158	0.311292115	0.310824792	3.596114381	6.605952924	16.19236176	16.22171886	21.59085769	26.67088743	39.99956812	45.68214068	52.72751472	50.56963224	50.64719806	50.79380931	47.04367062	32.40733441	11.26719882	24.79939986
15:29:28.123	0.312014559	0.310516136	3.596485173	6.606908997	16.19231688	16.2217041	21.58831123	26.66572219	39.98884024	45.66639192	52.71029327	50.55134479	50.62742381	50.77988596	47.03135267	32.4041389	11.26723415	24.79930877
15:29:29.113	0.312040104	0.311347519	3.597461049	6.608118175	16.19249732	16.22354292	21.58742422	26.66368394	39.98245637	45.66161403	52.70233788	50.54931761	50.62578716	50.77463025	47.03465191	32.4126517	11.2711947	24.80865052
15:29:30.080	0.3116616	0.311239997	3.59798314	6.608578187	16.19271126	16.22374856	21.58415485	26.65912113	39.97750218	45.64703593	52.68653396	50.53305733	50.60176362	50.75714103	47.01642808	32.40374776	11.2696299	24.80333821
15:29:31.055	0.311634193	0.31081836	3.598479947	6.609770094	16.19539633	16.22481635	21.58419365	26.65906009	39.9773629	45.65203473	52.68748781	50.53398441	50.60921557	50.76076591	47.02680969	32.41514262	11.27429834	24.81232122
15:29:32.032	0.311709049	0.310747637	3.599783772	6.61140336	16.1965719	16.2256376	21.58517625	26.65896532	39.97428263	45.64706906	52.6831989	50.53081764	50.60538031	50.75736956	47.02714907	32.41782609	11.27649622	24.81584207
15:29:33.018	0.312126004	0.311061203	3.600103949	6.612016041	16.196779	16.22545967	21.58338009	26.6544001	39.96891837	45.6373612	52.66478078	50.51527571	50.587116	50.73920068	47.01110222	32.40844649	11.27363664	24.80934819
15:29:33.983	0.312246504	0.311865203	3.601407858	6.613205895	16.19673411	16.22701433	21.58027323	26.65032311	39.95778516	45.62150064	52.65490958	50.49836286	50.57392237	50.72434002	46.99742931	32.40031259	11.27146276	24.80368837
15:29:34.970	0.31240263	0.311653252	3.60192978	6.6143692	16.19813277	16.2282177	21.57976023	26.64952405	39.95552212	45.62457109	52.64771684	50.49399371	50.56790605	50.71160207	46.99192925	32.3963182	11.27075223	24.80234814
15:29:35.944	0.312444175	0.312068672	3.602729217	6.614857496	16.19848169	16.22963571	21.57787186	26.64554637	39.95009954	45.60843819	52.63366742	50.47526307	50.54965168	50.69454199	46.97317566	32.38599862	11.2675912	24.79225597
15:29:36.919	0.312653273	0.311736905	3.603932157	6.616532279	16.20124908	16.23211075	21.57998054	26.6494859	39.95813857	45.6177377	52.64269901	50.48585339	50.55941381	50.70748329	46.98619951	32.39694644	11.27249776	24.80217567
15:29:37.896	0.312447317	0.311388876	3.604933319	6.61832939	16.2043753	16.23469593	21.58640572	26.65556764	39.96110785	45.62621472	52.65344021	50.49732027	50.57303206	50.71562217	46.9998429	32.40692585	11.27774188	24.81165312
15:29:38.881	0.313079118	0.312702105	3.606337927	6.620674832	16.20906342	16.23944026	21.59098147	26.66394142	39.97714637	45.64056629	52.67137784	50.51711154	50.59100798	50.74179405	47.01789499	32.42067533	11.28175222	24.82128951
15:29:39.852	0.312968435	0.313503522	3.607036493	6.621643871	16.21171325	16.24275851	21.59388201	26.66711137	39.984941	45.64468779	52.67331515	50.51987677	50.59385099	50.73992339	47.01761606	32.41606415	11.28084819	24.81730191
15:29:40.827	0.313321764	0.313314686	3.607962	6.623764379	16.2157516	16.2454021	21.60035148	26.67523526	39.99513134	45.66218273	52.68994222	50.53423777	50.6092554	50.75847122	47.02997292	32.42224689	11.28326778	24.82070239
15:29:41.798	0.313655108	0.313109592	3.609997186	6.626354726	16.22176432	16.25082149	21.60756857	26.68436388	40.0079872	45.68071428	52.70856701	50.5557502	50.627429	50.7834552	47.04439883	32.42788451	11.28580371	24.82414374
15:29:42.783	0.313532754	0.313092782	3.611099139	6.628300264	16.22600218	16.25619477	21.61463185	26.69323951	40.02286887	45.69488508	52.7319536	50.57560044	50.64925581	50.80124833	47.06309344	32.44093865	11.29079613	24.83197274
15:29:43.752	0.313806472	0.313726443	3.612327309	6.630604377	16.23138237	16.26092029	21.62152945	26.70385789	40.0371338	45.71723317	52.75792078	50.59829561	50.66886445	50.82005137	47.08190803	32.44883469	11.29434132	24.8383457
15:29:44.731	0.314168786	0.313687383	3.613782369	6.632844967	16.23693562	16.2662484	21.62972395	26.71348733	40.05249891	45.73382562	52.7800212	50.6184908	50.68603718	50.84692999	47.09724964	32.45821726	11.29764524	24.84327105
15:29:45.707	0.314506118	0.313606388	3.615136569	6.634537144	16.24174756	16.27033151	21.63570631	26.72233039	40.06695334	45.75158948	52.7976742	50.63434343	50.69824988	50.85829074	47.10831854	32.46209152	11.29965631	24.8455333
15:29:46.686	0.314517342	0.314685946	3.61649074	6.637385157	16.24610624	16.27492676	21.64368927	26.73077127	40.07793064	45.77248197	52.81602827	50.6514536	50.71582922	50.87638302	47.12329215	32.46802465	11.30240687	24.85013728
15:29:47.662	0.314502252	0.313748228	3.618172776	6.639861746	16.25387203	16.28389949	21.65533509	26.74776537	40.10460529	45.80388961	52.85739765	50.6904992	50.76057928	50.91628573	47.16448157	32.49569576	11.31381728	24.87194122
15:29:48.637	0.314939511	0.313648404	3.619400872	6.642401705	16.25764242	16.28791122	21.6616025	26.75667522	40.11609619	45.82124776	52.87633776	50.71055295	50.7808916	50.93349582	47.17830715	32.50492977	11.31729951	24.87745587
15:29:49.609	0.314944077	0.315464002	3.620553329	6.643846997	16.26146589	16.29036669	21.66705896	26.76106628	40.12271021	45.82819337	52.87993155	50.70750161	50.7821606	50.93528793	47.17113424	32.49456126	11.31415728	24.8683952
15:29:50.596	0.314989602	0.315358178	3.622210041	6.646034971	16.2657505	16.29559047	21.67178633	26.76711231	40.13431297	45.83836576	52.89311193	50.72010109	50.79027259	50.94525307	47.17923478	32.49736565	11.31478719	24.86918277
15:29:51.577	0.315267299	0.314749968	3.623034572	6.648194618	16.27035019	16.3003087	21.67882977	26.77654001	40.14798432	45.86034859	52.91714115	50.74272957	50.81484071	50.96670967	47.19852597	32.50960057	11.32008193	24.8780021
15:29:52.545	0.315537677	0.315455509	3.624237483	6.650120651	16.27416496	16.30324419	21.68342614	26.78293989	40.1611991	45.86759887	52.92563919	50.75243657	50.82111729	50.97331503	47.20072808	32.50538689	11.31961725	24.87361351
15:29:53.518	0.315567888	0.315695459	3.626020379	6.65269555	16.28108336	16.31041403	21.69537166	26.79849426	40.18378439	45.89860044	52.96824935	50.79481046	50.86786028	51.02367938	47.24540839	32.53829292	11.33004511	24.89786617
15:29:54.493	0.315779301	0.314835634	3.627399755	6.654407331	16.28514192	16.31454234	21.70086198	26.80639939	40.1988195	45.91047524	52.9827596	50.81083012	50.88304768	51.03774257	47.25240945	32.53923866	11.33074635	24.89820073
15:29:55.467	0.316432728	0.315183421	3.628501727	6.65667848	16.28864151	16.31828807	21.70533963	26.81159319	40.2050572	45.92167475	52.990208	50.81904656	50.88753576	51.04542673	47.25263334	32.5361401	11.32990398	24.89338265
15:29:56.453	0.31620478	0.314959492	3.62945229	6.658763717	16.29521788	16.32313561	21.71468794	26.82260979	40.22348901	45.9436664	53.01428607	50.84539349	50.91033519	51.06465073	47.27426502	32.54663631	11.33301821	24.90062121
15:29:57.421	0.316504798	0.316956505	3.631285637	6.661183514	16.29985629	16.32959223	21.72332999	26.83381276	40.24412219	45.9633887	53.03525537	50.86593788	50.93247929	51.08804169	47.29346722	32.55281904	11.3362831	24.90470455
15:29:58.409	0.316835775	0.315423979	3.633068382	6.663535271	16.30642955	16.33639801	21.73354317	26.84747328	40.25987333	45.99179576	53.06443021	50.89580897	50.96911569	51.1199673	47.32146136	32.56763191	11.34201609	24.91528845
15:29:59.380	0.316925275	0.317337965	3.634094702	6.666166946	16.31251523	16.34081819	21.74288777	26.86048318	40.28326936	46.01051491	53.10311746	50.92728253	51.0049945	51.14961409	47.34881757	32.58254768	11.34763648	24.92614312
15:30:00.358	0.316733309	0.316538053	3.636180132	6.668787582	16.31887413	16.35100294	21.75500424	26.87461338	40.30272046	46.03481532	53.13416774	50.96040956	51.03018649	51.18560378	47.37212772	32.59284659	11.35218705	24.93292771
15:31:16.012	0.331272836	0.330057199	3.726765332	6.809613499	16.59484821	16.62822808	22.09805005	27.28788836	40.9017156	46.69569252	53.88781194	51.66462362	51.73488036	51.91476507	47.96539895	32.93338958	11.53705731	25.18034424
15:31:16.998	0.330072532	0.32922578	3.726806595	6.812397935	16.60182938	16.63230202	22.10780598	27.29814025	40.92217662	46.72549976	53.91377195	51.69612783	51.76818372	51.92081862	47.99507417	32.95812425	11.54253091	25.19775517
15:31:17.970	0.330068455	0.329453802	3.728789462	6.814922653	16.60852302	16.63922284	22.11654123	27.30794251	40.93646547	46.73407014	53.93319975	51.72019822	51.79549241	51.94448202	48.01598273	32.97532234	11.54879643	25.21094128
15:31:18.940	0.330151298	0.328969819	3.729183863	6.816479627	16.60815761	16.63779343	22.11315812	27.30089804	40.92684736	46.72076924	53.90152015	51.68474553	51.75644665	51.90787874	47.97627573	32.94344309	11.53738942	25.1849767
15:31:19.922	0.330518856	0.33040791	3.730485848	6.817409399	16.60950336	16.64008466	22.11310552	27.29910491	40.92373847	46.71639689	53.89467462	51.67304319	51.74312472	51.89399213	47.96427845	32.93539376	11.53282173	25.17773653
15:31:20.907	0.330391548	0.329503747	3.731460019	6.819324347	16.61420789	16.64415207	22.11902331	27.30773389	40.93796212	46.73244361	53.91297201	51.69578991	51.76671583	51.91671193	47.99039435	32.95638342	11.5420352	25.19580261
15:31:21.879	0.330425101	0.330734741	3.732131743	6.820422503	16.61412177	16.64385708	22.11460804	27.30308155	40.92917777	46.71594705	53.89186604	51.67137053	51.74195795	51.89273779	47.96464742	32.9389621	11.53648868	25.18290616
15:31:22.849	0.330651137	0.329659414	3.733232114	6.82235082	16.61760352	16.64756874	22.11943162	27.30600802	40.92848289	46.72096276	53.89619098	51.67755727	51.74755578	51.9007284	47.97579817	32.94881981	11.540555	25.1910096
15:31:23.829	0.33099305	0.329935365	3.734155891	6.824016795	16.62026996	16.65043053	22.12158564	27.30893289	40.93580505	46.72402797	53.90283144	51.68251994	51.75528485	51.9064645	47.98478715	32.95907227	11.54568501	25.2013451
15:31:24.815	0.330939003	0.330919048	3.735281316	6.824767326	16.62121837	16.65212502	22.11939	27.30670418	40.93207522	46.71482771	53.89229965	51.67375705	51.74292783	51.8984002	47.97581953	32.95466766	11.54420466	25.19755525
15:31:25.785	0.331266604	0.32988394	3.735978256	6.825767189	16.62244119	16.65175232	22.11926502	27.30446126	40.9238886	46.70400285	53.87921471	51.6625831	51.73332321	51.88659311	47.96531918	32.95071253	11.54428051	25.19550669
15:31:26.756	0.331316139	0.330793167	3.736902103	6.826915577	16.62301393	16.65427747	22.1193414	27.30297103	40.92170892	46.704698	53.87188075	51.654099	51.72453182	51.88343261	47.96127021	32.95176646	11.54586587	25.19813929
15:31:27.736	0.331576457	0.331006647	3.737523303	6.828505063	16.62475972	16.65581019	22.1194659	27.30345342	40.92117199	46.70290318	53.87345886	51.65865329	51.72936277	51.88057704	47.97154475	32.96553997	11.55301057	25.21176475
15:31:28.707	0.331556392	0.331158509	3.738346289	6.829282069	16.6254707	16.65519756	22.11605335	27.29686089	40.91017693	46.68670076	53.8504313	51.63721461	51.70877605	51.8662774	47.95321529	32.95543481	11.55178175	25.2061315
15:31:29.693	0.331660189	0.330666826	3.739194345	6.830384282	16.62549259	16.65589363	22.11403961	27.29337765	40.90384565	46.67761371	53.83439621	51.62007737	51.69326767	51.84898262	47.9406207	32.95219584	11.55000322	25.20255573
15:31:30.664	0.331969466	0.330707435	3.739739978	6.830691611	16.62616532	16.65511245	22.11239123	27.29063286	40.89601121	46.66731796	53.82259199	51.60859348	51.68508696	51.83702158	47.92872014	32.94682719	11.54942462	25.19974468
15:31:31.643	0.332017657	0.331506274	3.740688944	6.832624055	16.62829349	16.65833724	22.11348883	27.29252066	40.89942324	46.67300502	53.82394995	51.61419389	51.68661379	51.84121425	47.93784704	32.95450047	11.5539063	25.20820733
15:31:32.613	0.332268989	0.330471158	3.741587563	6.833719996	16.62996626	16.65937131	22.11326069	27.28987643	40.88970681	46.66477982	53.81139265	51.59853955	51.6777219	51.82483144	47.92332974	32.94615639	11.55131505	25.20126367
15:31:33.598	0.33236246	0.33138211	3.742460825	6.834734825	16.63079407	16.66121488	22.11198419	27.28712951	40.88971199	46.66213968	53.80359855	51.58959322	51.66567183	51.82157728	47.91254975	32.94056202	11.55000046	25.19696594
15:31:34.568	0.33252055	0.332040601	3.743460287	6.835603569	16.63158742	16.66206093	22.11062097	27.28453553	40.88198527	46.64933618	53.78477091	51.57373239	51.64681555	51.79887563	47.89227036	32.92626686	11.54630145	25.185221
15:31:35.549	0.332871765	0.332360203	3.744434429	6.837741282	16.63466836	16.66540871	22.11682378	27.29177605	40.89356898	46.66622676	53.80208104	51.59351127	51.66588156	51.81961007	47.91677837	32.94477588	11.55495114	25.20249695
15:31:36.519	0.332240646	0.332044805	3.745307817	6.839361471	16.6371146	16.66843943	22.11830072	27.29316336	40.89591985	46.65887934	53.79891399	51.5871415	51.66075224	51.81294385	47.90919486	32.94131699	11.55486127	25.19889707
15:31:37.505	0.33319691	0.332307928	3.746609668	6.841477225	16.64014817	16.67114509	22.12255701	27.29817814	40.90087543	46.66169479	53.80609115	51.59032131	51.66624174	51.81823625	47.91202876	32.94212007	11.5560438	25.20033686
15:31:38.475	0.333092594	0.332997231	3.748037726	6.842618999	16.64463256	16.67383868	22.12539009	27.30316191	40.91086267	46.67395469	53.81842817	51.60098917	51.67687248	51.83206026	47.92356891	32.95078664	11.5608116	25.20718225
15:31:39.457	0.333427818	0.333168784	3.74923875	6.84498165	16.64752513	16.67896258	22.12963694	27.30638732	40.91554375	46.67599541	53.82332608	51.60742113	51.67921145	51.83396859	47.92686318	32.95307819	11.5634065	25.2100135
15:31:40.427	0.333546608	0.33280546	3.749784356	6.846815878	16.65021836	16.68146812	22.13252892	27.30983204	40.92313579	46.68192185	53.82733255	51.61099937	51.68460562	51.83973087	47.9315389	32.95636386	11.5656253	25.21257907
15:31:41.413	0.333568811	0.332713429	3.750859271	6.848105871	16.65241951	16.68497107	22.13407271	27.31046396	40.91817458	46.68282471	53.82218947	51.60706785	51.68124905	51.83591394	47.92709522	32.95300112	11.56592568	25.20933788
15:31:42.383	0.333557732	0.333154554	3.752715915	6.850660944	16.65880963	16.69011501	22.14302317	27.32307533	40.94142158	46.70706387	53.85796974	51.64332064	51.71612863	51.86978566	47.96886902	32.98351251	11.57841241	25.23395689
15:31:43.362	0.334222614	0.333646176	3.753715246	6.851643046	16.66192286	16.69328769	22.14709329	27.32789014	40.94857462	46.71216508	53.8678912	51.64889303	51.72182368	51.87461724	47.97388565	32.98570522	11.58101356	25.23494279
15:31:44.333	0.334131615	0.332988456	3.754840709	6.854051721	16.66593942	16.69644135	22.1522207	27.33369306	40.95909645	46.72138643	53.87863477	51.65992976	51.7316397	51.88753541	47.98126944	32.99166835	11.58345577	25.23793596
15:31:45.319	0.334480144	0.333179696	3.756192935	6.855841911	16.66989335	16.70096845	22.1571842	27.33972775	40.96464815	46.72618086	53.88737673	51.66861341	51.74246606	51.89001486	47.98733952	32.99323976	11.58473748	25.23861315
15:31:46.289	0.334565629	0.333485607	3.757343608	6.858211262	16.67423049	16.70541864	22.16551526	27.34966232	40.98110747	46.74533459	53.91206407	51.69308772	51.77098964	51.91229531	48.00900218	33.00924503	11.59072445	25.24965728
15:31:47.270	0.33444798	0.334420538	3.758670656	6.860768252	16.67937871	16.7117092	22.17266573	27.36048159	40.99314866	46.76451725	53.93443301	51.71919592	51.7961531	51.94430761	48.02983438	33.02009064	11.59569608	25.25755682
15:31:48.240	0.33486312	0.334574118	3.759997802	6.862855789	16.68599507	16.71648345	22.18092783	27.37059993	41.00996717	46.78039713	53.95516915	51.74049526	51.81379719	51.96396279	48.04089085	33.02414443	11.59770549	25.259119
15:31:49.228	0.335175011	0.334969899	3.761753375	6.865071855	16.69168103	16.72261796	22.190937	27.38319092	41.02917519	46.80606642	53.98221235	51.76577764	51.83794033	51.98890273	48.05878184	33.03114529	11.60050463	25.2629652
15:31:50.198	0.33552022	0.335221042	3.76338305	6.868249379	16.69926783	16.72936929	22.20230423	27.39735691	41.0497117	46.83303613	54.01529264	51.79311968	51.87210483	52.02116103	48.0854018	33.04328202	11.60756182	25.27189596
15:31:51.178	0.335615678	0.33438617	3.764911775	6.870841284	16.7048277	16.73563382	22.21282018	27.41195607	41.07191303	46.86562522	54.04722442	51.82333183	51.90092714	52.04890441	48.10777124	33.05452409	11.61306129	25.2786185
15:31:52.148	0.335444762	0.335682255	3.766667493	6.873850578	16.71157035	16.74171737	22.22279178	27.42376328	41.09098762	46.8829884	54.07055137	51.84117246	51.91958653	52.0734209	48.11960735	33.05577582	11.61492149	25.27648955
15:31:53.118	0.335836583	0.335555987	3.767591215	6.87587689	16.71705717	16.74575893	22.23153493	27.43379736	41.10247218	46.899339	54.09300732	51.86059169	51.93738147	52.08799091	48.13238445	33.05985408	11.61520399	25.27798469
15:31:54.104	0.336191756	0.335921817	3.769422402	6.878433691	16.72345182	16.75269717	22.24069873	27.44749189	41.12539019	46.9253669	54.11863284	51.88846992	51.96330265	52.11939125	48.15727611	33.07010295	11.62023915	25.28469278
15:31:55.083	0.336243925	0.335365936	3.770572933	6.880597425	16.72774992	16.75750307	22.24777015	27.45540006	41.13641276	46.93947493	54.14060324	51.90776495	51.97911078	52.13306355	48.16933811	33.07311322	11.62147549	25.28510327
15:31:56.053	0.336116297	0.336410419	3.772303408	6.882997227	16.7348865	16.76702859	22.26113646	27.47267626	41.16564671	46.98011892	54.18133411	51.95289101	52.02704793	52.17814278	48.21386076	33.10258017	11.63306654	25.30688477
15:31:57.024	0.337057519	0.336073623	3.773327944	6.88560451	16.73980846	16.76942344	22.26659216	27.48133813	41.17665582	46.99349846	54.19760942	51.96605838	52.04113039	52.19077038	48.22199973	33.10524464	11.63426399	25.30641376
15:31:58.011	0.335970903	0.336364999	3.774932187	6.888333801	16.74559706	16.77719767	22.27674304	27.49484795	41.1992052	47.01963672	54.23194513	52.00054371	52.07492829	52.22703096	48.25510734	33.12660033	11.64114566	25.32276298
15:31:58.991	0.336892131	0.336054736	3.775956627	6.890523678	16.75156541	16.78068098	22.28450679	27.5033911	41.20745713	47.0364311	54.2505416	52.01850303	52.09042966	52.24334774	48.26824684	33.13072571	11.6427731	25.32479115
15:31:59.962	0.337233991	0.336139855	3.777838331	6.89292341	16.75582851	16.78739942	22.29255645	27.51324019	41.22513709	47.05745776	54.27232522	52.03746753	52.1094418	52.26500483	48.28347803	33.13805111	11.64556051	25.32914749
15:32:00.933	0.337532563	0.336690539	3.779619181	6.895611459	16.76380592	16.79443545	22.30428109	27.53031472	41.25024552	47.09006833	54.31203296	52.08374998	52.14995453	52.30215302	48.32097416	33.16045063	11.65335815	25.34610051
15:33:15.842	0.352688735	0.35255458	3.894034853	7.086073427	17.21271407	17.23949358	23.00308372	28.43594957	42.66209694	48.76436037	56.297705	53.95538377	54.00385062	54.13828244	49.79046329	33.8614204	11.9643573	25.79931333
15:33:16.829	0.352045456	0.351881931	3.895262547	7.088754016	17.21763687	17.24969335	23.01210727	28.44555499	42.67695937	48.78467878	56.3087881	53.97711788	54.02221747	54.16342804	49.8060484	33.87363872	11.96813877	25.80077597
15:33:17.802	0.352603993	0.35077803	3.897549047	7.092131481	17.22645318	17.25735325	23.02485499	28.46113105	42.69463089	48.8147247	56.34275306	54.00447688	54.04897125	54.18358484	49.82457349	33.87882036	11.97130013	25.80290892
15:33:18.771	0.352626548	0.351996475	3.899306216	7.095227261	17.23218826	17.26376899	23.0356039	28.47563734	42.71350368	48.84056695	56.37325759	54.03351818	54.08161948	54.21587663	49.85718743	33.9000626	11.97943071	25.8184356
15:33:19.752	0.35255588	0.352110212	3.900760803	7.097257087	17.23576168	17.26862226	23.04008937	28.48077886	42.72768612	48.845384	56.38286776	54.03702378	54.08159539	54.21752662	49.85519777	33.89520539	11.97951824	25.81380391
15:33:20.722	0.35288138	0.352297548	3.902316295	7.099429022	17.24244047	17.27470089	23.05130959	28.49548549	42.74109031	48.87359754	56.41431311	54.07633265	54.12191457	54.26796892	49.8947862	33.92675727	11.99204645	25.83634753
15:33:21.709	0.353340027	0.352209338	3.903619582	7.101913003	17.24732489	17.27974176	23.05626107	28.50238185	42.75456023	48.89370127	56.43432428	54.08915775	54.13682554	54.28335982	49.90651582	33.93446441	11.99564352	25.84196682
15:33:22.679	0.353492413	0.352921203	3.904570094	7.104305498	17.25067236	17.28407053	23.063822	28.50953083	42.76800244	48.90542306	56.44552811	54.10564414	54.15224923	54.30095955	49.92260864	33.94608986	12.00107926	25.85008796
15:33:23.659	0.35333186	0.352410294	3.905974253	7.105339432	17.2530579	17.28690825	23.06346948	28.50985691	42.76608628	48.9043944	56.43997522	54.09623143	54.13987934	54.29071806	49.90946803	33.93590424	11.9978286	25.8402302
15:33:24.630	0.353747238	0.353538012	3.906899543	7.107452353	17.2578548	17.2897399	23.06813243	28.51695554	42.77503135	48.91609327	56.45603589	54.11651006	54.15911296	54.30854871	49.92737305	33.94705854	12.00304899	25.85174609
15:33:25.615	0.35386632	0.353792926	3.908429688	7.109634946	17.26188952	17.29402253	23.07411046	28.52301594	42.7850369	48.92527035	56.46907935	54.12837211	54.17255065	54.32724582	49.93758847	33.9529318	12.00546851	25.85548087
15:33:26.585	0.354048665	0.353541296	3.909859114	7.111643036	17.26591315	17.29811792	23.07964276	28.53108432	42.79454793	48.94021797	56.48142565	54.14155502	54.18477315	54.33329549	49.94661412	33.95647766	12.00846624	25.85781434
15:33:27.565	0.354184394	0.35314505	3.911036391	7.113819133	17.27025971	17.3025498	23.08550325	28.53799788	42.80713907	48.9449109	56.49717161	54.15230817	54.19567177	54.34362919	49.95563741	33.96079025	12.01136611	25.86137601
15:33:28.537	0.354479922	0.354746792	3.91208769	7.115390396	17.27487712	17.30765602	23.09109916	28.54681831	42.81850027	48.96274671	56.51500413	54.1716336	54.21180537	54.36376219	49.97060488	33.97001103	12.01604409	25.86864109
15:33:29.522	0.354569041	0.352678575	3.913441367	7.117850311	17.27892939	17.31074614	23.09653185	28.55271131	42.82959908	48.97091167	56.52119639	54.17613299	54.21503094	54.36635794	49.97024289	33.96527703	12.01618708	25.86416919
15:33:30.493	0.354468417	0.353547009	3.915097626	7.120391226	17.2850845	17.31792615	23.10887611	28.56768451	42.85386917	48.99832474	56.55702881	54.20471953	54.24909824	54.39381937	49.9978064	33.98396487	12.02535991	25.87841115
15:33:31.473	0.355036913	0.354763684	3.916652983	7.122805332	17.29134793	17.32341426	23.11569414	28.57705558	42.86832584	49.0193616	56.57650782	54.22299746	54.27300197	54.41592214	50.01669499	33.99581117	12.02962342	25.88703815
15:33:32.444	0.355382372	0.353851488	3.917956336	7.125317835	17.29662387	17.32886389	23.12386353	28.5877317	42.88282987	49.03297034	56.6009242	54.24317671	54.29391063	54.43059966	50.03340584	34.00518049	12.0338129	25.89356798
15:33:33.432	0.355225141	0.355004829	3.919007491	7.127786402	17.30171376	17.33364519	23.13196758	28.59720205	42.89715489	49.06246907	56.61880962	54.26504327	54.31354417	54.45092549	50.05029622	34.01395237	12.03829316	25.89944039
15:33:34.402	0.355733719	0.354742078	3.920840179	7.130235567	17.30729547	17.33753301	23.13911537	28.60797843	42.9133948	49.07829215	56.64066096	54.29313391	54.33948215	54.47694259	50.07707904	34.03328416	12.04699188	25.9148314
15:33:35.382	0.355320164	0.354707777	3.922093036	7.131736774	17.30890165	17.34158234	23.13935687	28.60616406	42.9109046	49.06998992	56.62969851	54.27734375	54.32335269	54.4590199	50.0557019	34.01539143	12.04173799	25.89946747
15:33:36.352	0.35588866	0.355180884	3.923119108	7.133157318	17.3121812	17.34495816	23.1429684	28.61015236	42.91634639	49.08037232	56.63681633	54.28287499	54.32973155	54.46558653	50.0661032	34.02364546	12.04532727	25.9069328
15:33:37.339	0.356200812	0.354806029	3.923212412	7.13340487	17.31154962	17.34374499	23.13902974	28.60322117	42.9030953	49.05854592	56.6126642	54.254612	54.2990202	54.44181053	50.03442336	34.00277803	12.0384672	25.89184873
15:33:38.309	0.356196726	0.355004472	3.924414921	7.135172639	17.31457925	17.34554604	23.14171301	28.60762742	42.90932475	49.0646906	56.62245074	54.26814718	54.31246054	54.44914856	50.05056035	34.01700447	12.04375749	25.90400513
15:33:39.276	0.356568812	0.355240566	3.925239355	7.135769898	17.31400153	17.3456623	23.13732423	28.60048118	42.89788206	49.04454452	56.59880463	54.2377844	54.28439695	54.42555492	50.02223505	33.99906453	12.03730628	25.89082194
15:33:40.262	0.356651265	0.356304898	3.92593761	7.137465353	17.3162836	17.34803934	23.13862606	28.60224405	42.89935977	49.04312026	56.59970393	54.24006842	54.29051732	54.43155501	50.03123317	34.01142981	12.04323712	25.90121175
15:33:41.233	0.35664052	0.356021612	3.927039276	7.138960107	17.31901032	17.35168074	23.14187893	28.60566373	42.90383014	49.05843679	56.61391842	54.25662295	54.30812288	54.44648523	50.05471131	34.03410638	12.05459667	25.92082529
15:33:42.219	0.356955996	0.356064309	3.927712319	7.139011113	17.31822589	17.35080459	23.13739528	28.59727827	42.88936366	49.03302567	56.58407285	54.22645129	54.27466948	54.42093607	50.02677206	34.01760104	12.05034621	25.90931008
15:33:43.184	0.356619022	0.355415676	3.928360314	7.140451351	17.31822451	17.35105055	23.13491722	28.59489723	42.88699863	49.02497519	56.57234922	54.21826185	54.26641932	54.41025851	50.02143594	34.0182477	12.05014874	25.91041423
15:33:44.154	0.357310675	0.356195087	3.929335946	7.141293138	17.31997516	17.35136755	23.13461442	28.59365251	42.88083218	49.01692349	56.5700976	54.21761768	54.26314621	54.4082189	50.02284371	34.02280903	12.05086562	25.91582102
15:33:45.139	0.357539598	0.356615117	3.9300594	7.143130529	17.32119588	17.35321968	23.13418758	28.59215536	42.88172894	49.01944496	56.56413421	54.21348719	54.26129127	54.40327693	50.02450041	34.02766542	12.05489876	25.92122561
15:33:46.121	0.357448949	0.356149575	3.931160963	7.143592145	17.32149063	17.35327689	23.13176706	28.58769938	42.87628689	49.00434274	56.54821153	54.19725702	54.24318137	54.39060027	50.01025903	34.02256026	12.05385602	25.91676763
15:33:47.089	0.357448191	0.356174321	3.931330013	7.144235222	17.32039541	17.35257009	23.12729486	28.58148955	42.86148752	48.98830015	56.52378728	54.17410467	54.21415381	54.36903516	49.98542184	34.003803	12.0478064	25.90458712
15:33:48.074	0.357640494	0.356851889	3.931851813	7.14524056	17.3201079	17.35330759	23.12415219	28.57756829	42.85375865	48.97352344	56.5090588	54.16075223	54.20132658	54.3503745	49.97150127	33.99564951	12.04585512	25.89915326
15:33:49.045	0.357812834	0.357438771	3.933054273	7.14684665	17.32279045	17.35515388	23.12642279	28.57968394	42.85850435	48.98311859	56.51355984	54.16731717	54.20841654	54.35692993	49.98181034	34.00675278	12.0505491	25.9081147
15:33:50.028	0.357429246	0.356671198	3.9336517	7.148066022	17.32489324	17.35690886	23.1270324	28.57868864	42.85641162	48.97988588	56.50772731	54.16242587	54.20036509	54.35244071	49.97867287	34.00511692	12.05159838	25.90789317
15:33:50.996	0.357964432	0.357222145	3.934526502	7.148931833	17.32629995	17.35741386	23.12490779	28.57563867	42.85166812	48.96854197	56.49314034	54.14982923	54.18693337	54.34000003	49.96422873	33.99629703	12.0493232	25.90121897
15:33:51.983	0.358266583	0.357997241	3.935577595	7.150550773	17.32788804	17.35965465	23.12857176	28.57934075	42.85573803	48.9707034	56.50131822	54.15696641	54.19798099	54.34768582	49.97338699	34.00576223	12.0539955	25.90936275
15:33:52.953	0.358635322	0.357133857	3.93647758	7.152102259	17.32944752	17.36131302	23.12847035	28.57884845	42.85454995	48.97262194	56.49332747	54.14905381	54.18840948	54.3409856	49.96504491	33.99887496	12.05222718	25.90538783
15:33:53.935	0.358288353	0.357423824	3.937553908	7.152275588	17.33011562	17.36212191	23.12671781	28.57651583	42.84895525	48.9568125	56.47960031	54.13506617	54.1761424	54.32695445	49.95468134	33.9931506	12.05004435	25.90089004
15:33:54.904	0.358680393	0.35872085	3.938151428	7.153811793	17.33228076	17.36450609	23.12744646	28.57567258	42.84646744	48.95617997	56.47971288	54.13255115	54.17231145	54.31909771	49.95340547	33.99451535	12.05031844	25.90303596
15:33:55.889	0.358659646	0.357800987	3.939328548	7.155411085	17.33489201	17.36618316	23.12870414	28.57716806	42.84684433	48.95771253	56.47773675	54.13672369	54.17553677	54.3187403	49.95618651	33.99991679	12.05337057	25.90742465
15:33:56.859	0.358808681	0.358196201	3.94022852	7.156766008	17.33590463	17.36840526	23.13087652	28.57819709	42.84824086	48.96256458	56.47935534	54.13408328	54.17744561	54.32814977	49.962045	34.00576649	12.0575202	25.91328544
15:33:57.840	0.35911083	0.358065209	3.941052787	7.158151337	17.33804859	17.36916233	23.13143224	28.57917475	42.85055303	48.95917528	56.47732843	54.13713613	54.17879254	54.32524814	49.96579039	34.01250654	12.06059319	25.91883724
15:33:58.809	0.359469578	0.358587049	3.941725912	7.159589248	17.33956397	17.37043837	23.13080053	28.5775792	42.8483176	48.95435049	56.47120168	54.1313405	54.17247265	54.32339672	49.96391804	34.01476324	12.06177146	25.92076919
15:33:59.781	0.358986138	0.358755524	3.942222575	7.159581455	17.33842739	17.37065153	23.12560139	28.57028263	42.83143091	48.94061223	56.44384361	54.10263411	54.14527489	54.29536433	49.93655813	33.9946436	12.05664479	25.90650425
15:35:15.728	0.373955265	0.376520056	4.035570036	7.306461855	17.62526413	17.65525078	23.47995663	28.99196632	43.45280753	49.62640561	57.18524335	54.80414795	54.83887559	54.99990134	50.51983162	34.35077966	12.26025309	26.1648027
15:35:16.708	0.373280131	0.371970984	4.037028889	7.307460053	17.62767366	17.660735	23.48391397	29.00011413	43.46623136	49.62038362	57.20486045	54.82003978	54.85709448	55.00327687	50.53494623	34.36150002	12.26322076	26.17832446
15:35:17.695	0.373467065	0.37236847	4.038638931	7.310209343	17.63420994	17.66734643	23.49226532	29.00963211	43.47976973	49.63732636	57.22164703	54.83614841	54.87592182	55.02262285	50.55258243	34.37526622	12.26944164	26.18879959
15:35:18.666	0.373564122	0.37315092	4.039442556	7.311788395	17.63462379	17.66791331	23.49094002	29.00786929	43.47712475	49.63011403	57.21089659	54.82332492	54.86321786	55.01057886	50.53816038	34.364412	12.26594803	26.18111031
15:35:19.637	0.37406725	0.372425093	4.041052641	7.313636009	17.63984939	17.67315147	23.49916417	29.01621798	43.48921854	49.65148455	57.23141657	54.84503689	54.88874962	55.03296668	50.56531588	34.38447203	12.27410368	26.19652976
15:35:20.616	0.373937978	0.373408608	4.042486287	7.315420249	17.64424592	17.6763875	23.50426055	29.02421533	43.50122045	49.66133821	57.24650333	54.86353919	54.90427715	55.04850237	50.58260897	34.39695096	12.27884805	26.20592375
15:35:21.601	0.373948505	0.37368804	4.043189059	7.316979553	17.64625557	17.67856738	23.50633726	29.02551042	43.50123557	49.66728152	57.24564927	54.8615372	54.9008639	55.04695365	50.58033942	34.39374911	12.27858241	26.20441715
15:35:22.573	0.374418351	0.373170958	4.044269896	7.319100083	17.64979393	17.68123986	23.50958287	29.03009855	43.50518784	49.67341671	57.25330524	54.87106638	54.90852164	55.05429524	50.58692374	34.39810405	12.28024522	26.20729352
15:35:23.543	0.374485454	0.37317831	4.045300333	7.320698778	17.6530766	17.68599857	23.51384975	29.03467004	43.51457543	49.67748472	57.26170776	54.88075888	54.91526559	55.05519352	50.59100864	34.40097299	12.28098977	26.20938204
15:35:24.523	0.37477557	0.374314985	4.046683566	7.32248955	17.65744663	17.68998611	23.51927992	29.04301825	43.52450563	49.70311261	57.28118169	54.89349597	54.93881563	55.07704023	50.60949384	34.41290659	12.2860711	26.21955037
15:35:25.509	0.374746156	0.373524146	4.047991173	7.324730072	17.66169896	17.69386341	23.52623682	29.04794	43.53727186	49.70781988	57.29405439	54.90644996	54.95170169	55.08649483	50.62061674	34.42152008	12.28941672	26.22587092
15:35:26.480	0.375066224	0.37418257	4.048240347	7.325608214	17.66204224	17.69471533	23.52435178	29.04672868	43.53193598	49.69907953	57.28029249	54.89324582	54.93584961	55.06969265	50.60319065	34.40568718	12.28321155	26.21258512
15:35:27.451	0.375369651	0.374076995	4.05002683	7.327318247	17.66587452	17.69917596	23.52843693	29.05155077	43.53696614	49.70947288	57.28883111	54.90130655	54.94233945	55.08262957	50.60787156	34.40811006	12.28254335	26.21385866
15:35:28.434	0.375493347	0.37385765	4.051057221	7.329290214	17.66885709	17.7016409	23.53300287	29.05685701	43.54640701	49.71375339	57.29187782	54.90604852	54.94501962	55.082579	50.60642783	34.40381862	12.28213303	26.20984122
15:35:29.403	0.375557123	0.374421968	4.052465679	7.331323403	17.67303917	17.70544071	23.53718134	29.06201342	43.55177355	49.72212448	57.30558279	54.91840586	54.9596847	55.09378682	50.61684208	34.41022972	12.28513207	26.21418713
15:35:30.390	0.375527711	0.374804938	4.053697669	7.333692724	17.67835843	17.71096358	23.54683355	29.07468988	43.57365204	49.74579668	57.33379161	54.94588049	54.98927598	55.11780218	50.64156352	34.42696746	12.28987986	26.22751978
15:35:31.360	0.376000893	0.375358998	4.055181725	7.335894025	17.68376618	17.71721882	23.55581363	29.08486009	43.58942279	49.76748136	57.36184621	54.97743562	55.01572094	55.14849416	50.6648654	34.4438064	12.296459	26.23961237
15:35:32.339	0.376104617	0.374685345	4.056564946	7.337944607	17.6883037	17.72238547	23.56157267	29.09314132	43.60272419	49.78010979	57.37972323	54.99213032	55.0308924	55.16651846	50.67988738	34.45009211	12.30145121	26.24511877
15:35:33.311	0.376514561	0.374958787	4.057998588	7.340150254	17.6930324	17.72735786	23.56916321	29.1020245	43.61724882	49.79212073	57.39590694	55.008566	55.04443976	55.1829244	50.69277757	34.45766672	12.30517797	26.24870269
15:35:34.297	0.376398608	0.375708802	4.059129768	7.341988992	17.69778728	17.73091762	23.57503984	29.10906863	43.62491606	49.79960291	57.40647525	55.01385128	55.05168921	55.19211425	50.69234223	34.45275556	12.30419656	26.24350942
15:35:35.267	0.376731997	0.376942197	4.060034178	7.344506875	17.70094347	17.73439343	23.58153065	29.11592959	43.63641347	49.81611923	57.41718784	55.0228907	55.06117461	55.20854234	50.70016463	34.45485631	12.30645493	26.24431541
15:35:36.246	0.37702212	0.37585872	4.061896222	7.347136052	17.70885235	17.7405189	23.59250857	29.12974268	43.6582385	49.84282515	57.44653275	55.05477083	55.09731635	55.24530159	50.73743032	34.47885199	12.31718846	26.26412647
15:35:37.218	0.376939445	0.376436756	4.063405461	7.349289281	17.71303724	17.74570505	23.59750675	29.1376397	43.66619643	49.85715038	57.46027595	55.0689765	55.1103557	55.25948237	50.7480729	34.485931	12.32044146	26.26913936
15:35:38.205	0.377482543	0.376696541	4.065040663	7.351558133	17.71890606	17.75205064	23.6083862	29.150834	43.6880366	49.88806879	57.49829071	55.10303101	55.14512532	55.29369612	50.78441988	34.51123809	12.33002652	26.28894904
15:35:39.174	0.377736049	0.376541345	4.066071077	7.353530151	17.72130977	17.75501461	23.60815078	29.15082596	43.68688228	49.88130587	57.48963669	55.09026211	55.13460495	55.28558439	50.7676134	34.4954059	12.32318463	26.27579761
15:35:40.155	0.377929649	0.376653963	4.067076253	7.355545757	17.72437752	17.75801076	23.61240239	29.15524628	43.69252377	49.88737259	57.49508453	55.09473193	55.13860506	55.28379339	50.76814169	34.49423548	12.323949	26.27471873
15:35:41.126	0.377750446	0.377093403	4.06798065	7.356947883	17.72714565	17.76048878	23.61483773	29.15772834	43.69609374	49.89144015	57.49665225	55.09523267	55.13595471	55.28874424	50.76555266	34.49314071	12.32283601	26.27357442
15:35:42.113	0.378303534	0.376774814	4.069489836	7.358804055	17.72998402	17.76462508	23.6202429	29.16418733	43.70412021	49.90129263	57.50888161	55.1071525	55.15148012	55.30013641	50.78038941	34.50192659	12.32879948	26.2819108
15:35:43.083	0.378111016	0.377022603	4.070646249	7.360134129	17.73307548	17.76620256	23.62267335	29.16730449	43.71083973	49.90739377	57.51659549	55.11320051	55.1528919	55.30246597	50.78380856	34.50420048	12.33196766	26.28291692
15:35:44.063	0.378174803	0.377278108	4.071752228	7.362034008	17.73754821	17.77138853	23.62861875	29.17371361	43.71880514	49.91241564	57.52909805	55.13088567	55.16714864	55.31609476	50.80119154	34.5178666	12.33611971	26.29308387
15:35:45.034	0.378095457	0.377461732	4.072858231	7.363359705	17.73873204	17.77297246	23.62878584	29.17275283	43.71453947	49.91417996	57.52210532	55.11740967	55.16246726	55.30434822	50.79050768	34.50968796	12.33410289	26.2874252
15:35:46.003	0.378625238	0.377686423	4.073510613	7.365163578	17.74178529	17.77578738	23.63269408	29.17623769	43.71799479	49.91747238	57.5254774	55.12427349	55.16545314	55.31257037	50.79353708	34.51310127	12.3335277	26.28955329
15:35:46.989	0.378722315	0.377883761	4.074515764	7.367323235	17.74532025	17.7793341	23.63701911	29.1818443	43.72803941	49.92863933	57.54126325	55.14043519	55.1794552	55.3246013	50.81050629	34.52409142	12.33708787	26.29949222
15:35:47.968	0.379045732	0.377092003	4.075697344	7.368729659	17.74861432	17.7834381	23.64032807	29.18435938	43.73166274	49.93226807	57.54306374	55.1387597	55.17913953	55.3233722	50.80864989	34.52383763	12.33509544	26.29773239
15:35:48.938	0.379492303	0.378711349	4.077055359	7.370203823	17.75081514	17.78497021	23.64144271	29.18679128	43.73337509	49.93187533	57.5403805	55.13839032	55.18055124	55.3223204	50.80493732	34.51887908	12.33308078	26.29481184
15:35:49.924	0.379705882	0.377771577	4.077909297	7.372007576	17.75346536	17.78746088	23.64448142	29.19017509	43.73864952	49.93441379	57.54345883	55.13883509	55.17891462	55.32473609	50.8050979	34.5165934	12.33221306	26.29365213
15:35:50.895	0.379726396	0.377486326	4.079090895	7.373571247	17.75680953	17.79035997	23.64784459	29.19411105	43.74353431	49.94253703	57.54846613	55.1473301	55.18951638	55.33212082	50.81211694	34.52369679	12.33444421	26.29811708
15:35:51.876	0.379513912	0.379987	4.080146456	7.375423061	17.76031222	17.79483967	23.65335293	29.20167317	43.75573473	49.95426595	57.56882773	55.16784279	55.21042414	55.35209318	50.83158605	34.53822917	12.3401161	26.3096991
15:35:52.847	0.380003759	0.378852117	4.080950032	7.377006378	17.76265408	17.79377379	23.65126651	29.19944222	43.74882406	49.94841296	57.55206764	55.14952681	55.19274453	55.33334195	50.81448169	34.52475038	12.33543563	26.29982027
15:35:53.833	0.380067553	0.379819532	4.081728361	7.377928028	17.76296463	17.79602474	23.65231192	29.1971605	43.74632403	49.94078384	57.54174418	55.13719153	55.17582489	55.3237415	50.7992098	34.51332543	12.33297549	26.29086106
15:35:54.802	0.380128009	0.379352887	4.082884758	7.379190394	17.76570626	17.79905989	23.65506635	29.200545	43.75133881	49.94436828	57.54969159	55.14639366	55.18784847	55.33046558	50.81182416	34.52471379	12.33792208	26.30152304
15:35:55.784	0.380378203	0.379379105	4.084116719	7.380673197	17.76874745	17.80229566	23.65799712	29.20471442	43.75626928	49.95018756	57.55767665	55.15635582	55.20098753	55.34325668	50.82457422	34.53818081	12.34235503	26.31223659
15:35:56.754	0.380674993	0.380498813	4.084491872	7.38157311	17.76809127	17.80165738	23.65534123	29.19857284	43.74563578	49.93759378	57.5373019	55.13303688	55.17548904	55.32242414	50.8021503	34.52086341	12.33855361	26.29995416
15:35:57.727	0.380186228	0.380130571	4.085623051	7.382999198	17.77075934	17.80379192	23.65723146	29.20257551	43.75107857	49.94408775	57.54666369	55.14838381	55.18705512	55.33125133	50.81875391	34.53831908	12.34552452	26.31388738
15:35:58.712	0.380935721	0.379965986	4.086401377	7.38342085	17.7707789	17.80461108	23.65457512	29.19648344	43.74387721	49.92851577	57.52830593	55.12615111	55.16856179	55.31402962	50.80474353	34.5304609	12.34380479	26.3089483
15:35:59.677	0.380799787	0.380453377	4.086927749	7.3847662	17.77119271	17.80449118	23.6541483	29.19620811	43.74132401	49.92819078	57.52651235	55.12741374	55.16961864	55.31815489	50.81038741	34.54028919	12.34905546	26.31828832
15:37:15.124	0.392501088	0.389854896	4.16313063	7.49592476	17.94581018	17.98004747	23.80279799	29.33441204	43.90914309	50.04594205	57.60107311	55.19462344	55.25477159	55.40434315	50.9048565	34.67494532	12.45393778	26.44683159
15:37:16.110	0.394053806	0.392969374	4.164776765	7.4988659	17.95522805	17.98852695	23.81041869	29.34651708	43.9287147	50.06598708	57.62780607	55.22798784	55.27965551	55.42169465	50.92906321	34.68689365	12.46330898	26.45790185
15:37:17.089	0.394055699	0.393357556	4.167027675	7.501992776	17.96293063	17.99601619	23.82224585	29.36132956	43.94848664	50.09580419	57.66378535	55.25510284	55.30976902	55.4579731	50.95703077	34.70466126	12.47038182	26.4701878
15:37:18.059	0.394639994	0.394186299	4.168497692	7.504742298	17.96931772	18.00261904	23.83175362	29.37380576	43.97113398	50.11127215	57.69505827	55.28689553	55.34247363	55.48692205	50.98587155	34.72290057	12.47876372	26.48415692
15:37:19.046	0.394372311	0.39327677	4.170446102	7.507871047	17.97658155	18.00951148	23.84239632	29.3894174	43.99878158	50.14666714	57.73550281	55.32650973	55.38151591	55.52361537	51.02229431	34.74576678	12.48775214	26.50075321
15:37:20.016	0.394617153	0.394195326	4.171815316	7.510592146	17.98268644	18.0174094	23.85364078	29.40201006	44.01633918	50.16498693	57.76223407	55.3558011	55.40579496	55.55010858	51.04549578	34.75907886	12.49401088	26.50971611
15:37:20.998	0.39528462	0.393948766	4.172982763	7.512869739	17.98770296	18.0196977	23.85852848	29.41044055	44.0281394	50.17484657	57.77404064	55.36372501	55.41733106	55.55981983	51.04675804	34.75518199	12.49251692	26.50472744
15:37:21.967	0.395103489	0.393571355	4.174427556	7.514591138	17.99000005	18.02404023	23.86273169	29.41446493	44.03085749	50.1812517	57.77879474	55.36529339	55.4130373	55.5565008	51.0371593	34.74140881	12.48884301	26.49333322
15:37:22.939	0.395112044	0.393965525	4.176250196	7.517879617	17.9992777	18.03456699	23.8780626	29.43440536	44.06271846	50.21998546	57.82318104	55.41540241	55.4660905	55.60719007	51.08204303	34.77177858	12.50025281	26.51354884
15:37:23.909	0.395623109	0.394808784	4.177720141	7.520410733	18.00665452	18.03888986	23.88852136	29.44788239	44.08547891	50.24724292	57.84862015	55.44420331	55.49498671	55.64152041	51.10400597	34.78301065	12.5062633	26.52102976
15:37:24.905	0.395671561	0.395144729	4.179466764	7.522906063	18.01182216	18.04489373	23.89744404	29.45948186	44.09724407	50.26577741	57.86756836	55.45994911	55.51138911	55.65637825	51.11376759	34.78411253	12.50592389	26.52024395
15:37:25.873	0.396179296	0.394606506	4.180861138	7.52531497	18.01634914	18.04947573	23.90482645	29.46711346	44.11714682	50.28130029	57.8849384	55.47064919	55.52297981	55.67234618	51.11718789	34.77873244	12.5040877	26.51422955
15:37:26.845	0.396001488	0.394537894	4.182860078	7.529028971	18.0254913	18.0590955	23.92064229	29.4889233	44.15410309	50.3239514	57.94057032	55.51879952	55.5725801	55.71937874	51.16576044	34.80788838	12.51478404	26.53642021
15:37:27.816	0.396509214	0.395245124	4.184430731	7.531810973	18.03294998	18.06560038	23.93139458	29.5032008	44.1748908	50.35163386	57.97171561	55.55091448	55.60106862	55.75102121	51.19006007	34.82082817	12.52025062	26.54516882
15:37:28.812	0.396304749	0.396114823	4.185623045	7.534015918	18.0373006	18.07091106	23.93904094	29.51217732	44.18884809	50.36695568	57.98962463	55.56356095	55.61356233	55.7552439	51.19590165	34.81955316	12.51955974	26.54147293
15:37:29.783	0.396835764	0.395951259	4.187747926	7.537644745	18.04529091	18.07797272	23.95303114	29.53011186	44.21657331	50.405058	58.02693767	55.60551363	55.65615826	55.79488886	51.22950643	34.83784031	12.52778576	26.5544395
15:37:30.753	0.39665796	0.395892909	4.188915467	7.540177886	18.05124229	18.08504735	23.96363101	29.54465611	44.24073017	50.43781521	58.0563957	55.63463828	55.68520432	55.82615638	51.25091769	34.84840328	12.5313609	26.55974415
15:37:31.723	0.397338721	0.395595911	4.191191494	7.543693192	18.06011685	18.09399987	23.9786317	29.56412678	44.27837282	50.48037477	58.11323832	55.67985167	55.73216394	55.87280204	51.29520278	34.87572656	12.54261092	26.58066618
15:37:32.719	0.397267366	0.395889071	4.19271127	7.545869675	18.06687045	18.09890229	23.98685147	29.57301896	44.29567581	50.49221443	58.13156099	55.69570396	55.74211916	55.88447643	51.29753693	34.86870776	12.54104145	26.57435394
15:37:33.689	0.397834976	0.396017193	4.193878777	7.548062262	18.0702627	18.10430598	23.99177429	29.58094915	44.30282347	50.50244567	58.14149433	55.69754164	55.74599366	55.88642828	51.29199398	34.85805399	12.5380661	26.56312012
15:37:34.659	0.397956667	0.397738	4.196053986	7.551878691	18.08056777	18.11544699	24.00974756	29.60228942	44.3350631	50.54303899	58.19564347	55.7504721	55.80000585	55.93735489	51.34189342	34.88802581	12.55007243	26.58544333
15:37:35.629	0.39820481	0.396757566	4.198556682	7.55569727	18.09042029	18.12297451	24.02720048	29.62518243	44.37179505	50.58853865	58.24852709	55.81133756	55.85736663	55.99910175	51.39264036	34.91812113	12.5627132	26.60975516
15:37:36.609	0.398023662	0.397586198	4.199774367	7.557843629	18.09489541	18.12701708	24.03167445	29.63232446	44.38263746	50.5953972	58.25104185	55.81099689	55.8539802	55.99633813	51.38069971	34.90209355	12.55635966	26.59266014
15:37:37.581	0.398651157	0.397691211	4.201218911	7.560627543	18.10096361	18.13316497	24.04318525	29.64678294	44.40580615	50.63277714	58.28053507	55.84316214	55.88490072	56.02377178	51.40325476	34.91159106	12.56140608	26.60000631
15:37:38.566	0.398922566	0.397359115	4.203393799	7.564177093	18.10987424	18.14369531	24.05877517	29.66800109	44.43616837	50.66931013	58.33206836	55.89581345	55.93824582	56.06791052	51.44439328	34.93710356	12.57279921	26.61902978
15:37:39.537	0.399303808	0.398239071	4.205291795	7.567168334	18.11767863	18.15141019	24.0727584	29.68523138	44.46448641	50.70348939	58.37276869	55.92988048	55.97439256	56.10785954	51.47336534	34.95103231	12.57776701	26.62669622
15:37:40.517	0.399382216	0.398616917	4.207340775	7.570497552	18.12666302	18.16107313	24.08746083	29.70539809	44.49935713	50.73602588	58.42059276	55.97633623	56.02235925	56.15147059	51.5164067	34.97607485	12.58635957	26.64409166
15:37:41.492	0.399453976	0.398920354	4.208558486	7.572842577	18.13185515	18.16636563	24.09604139	29.71546278	44.51352337	50.74967793	58.43612533	55.9882798	56.03237021	56.1640194	51.51966219	34.97121302	12.58561192	26.63862334
15:37:42.478	0.399765308	0.398548912	4.210632525	7.575516787	18.1391613	18.17418877	24.10795076	29.730818	44.53432589	50.7790903	58.46352866	56.02027506	56.06455242	56.20188165	51.54418297	34.98177222	12.58906558	26.64540642
15:37:43.449	0.399960194	0.39904908	4.212026626	7.579267449	18.14689779	18.18061473	24.11918588	29.74697843	44.55824186	50.81079782	58.50444751	56.05760157	56.10029155	56.24122353	51.57526238	34.99797802	12.59602983	26.65664966
15:37:44.431	0.400234925	0.398648567	4.213873977	7.581898089	18.15357257	18.18899499	24.13291572	29.76398733	44.57928944	50.84337701	58.54602285	56.0925867	56.13267732	56.28110057	51.60732384	35.01544441	12.60389236	26.668692
15:37:45.400	0.400349948	0.398685151	4.215242896	7.584299969	18.15867691	18.19307051	24.13801862	29.77208232	44.59075188	50.8528982	58.5594293	56.10241171	56.14157312	56.28605531	51.60723442	35.00800892	12.60273373	26.66175635
15:37:46.385	0.400521516	0.39925542	4.217442851	7.587218557	18.16711093	18.20201363	24.15051617	29.78880605	44.61690181	50.88419573	58.60724162	56.13880819	56.18324315	56.3186438	51.6417926	35.02933643	12.61136896	26.67777555
15:37:47.357	0.400862808	0.399623	4.218862076	7.589993502	18.17249979	18.20811543	24.16053378	29.80075719	44.63931898	50.90529126	58.63389624	56.16216484	56.20999889	56.34884775	51.66115947	35.03920425	12.61644583	26.68361265
15:37:48.338	0.401170808	0.400253993	4.220155179	7.592530239	18.17824902	18.21330323	24.16975474	29.81247199	44.65795158	50.92637227	58.65984638	56.18856162	56.23380809	56.36979129	51.68045485	35.04884773	12.62101566	26.68955514
15:37:49.306	0.401631893	0.400327348	4.221826363	7.595121941	18.18398776	18.21890026	24.17793812	29.82407313	44.67853573	50.94871486	58.68060663	56.21523438	56.25335924	56.38915398	51.69922659	35.05814667	12.62471618	26.69475205
15:37:50.291	0.401194514	0.40150657	4.223346095	7.597824372	18.19012422	18.22555089	24.18896327	29.83663807	44.6952415	50.96954697	58.70028955	56.24141172	56.2758472	56.41217601	51.71604533	35.06283838	12.62799388	26.6987452
15:37:51.261	0.401782039	0.399440826	4.225218748	7.600666947	18.19729324	18.2311929	24.19860783	29.85124385	44.72103506	51.00280134	58.73263779	56.27123534	56.30310984	56.44885146	51.73790997	35.07471132	12.63433146	26.7054232
15:37:52.243	0.401923654	0.401010913	4.226864461	7.603068252	18.20379413	18.2378696	24.20750914	29.86233974	44.73483805	51.01479794	58.75221755	56.28567389	56.31509486	56.46019558	51.74492056	35.07398216	12.63591242	26.70367759
15:37:53.212	0.402231663	0.401437495	4.228485193	7.6065088	18.21278441	18.24675551	24.22223567	29.8822384	44.76614728	51.05499037	58.80521457	56.33783416	56.36843807	56.51537312	51.79006898	35.1037278	12.64745209	26.72518379
15:37:54.198	0.40242651	0.401374818	4.230231574	7.609669413	18.21903504	18.25340572	24.23289201	29.89610453	44.78456316	51.08099663	58.83485703	56.36096631	56.38853961	56.53197657	51.80624492	35.10636444	12.6499731	26.72563969
15:37:55.170	0.402970761	0.400534723	4.232053754	7.612387428	18.22690562	18.26114509	24.24529725	29.91227831	44.81079812	51.11189107	58.86624934	56.39339644	56.42757193	56.5645553	51.83418104	35.12004371	12.65563032	26.73574717
15:37:56.137	0.402363713	0.402094541	4.233498147	7.614629819	18.23226209	18.26667052	24.25226325	29.92075581	44.82342785	51.1277089	58.87899844	56.40175231	56.43347239	56.5726126	51.83216597	35.1120886	12.65418847	26.72750391
15:37:57.121	0.403031058	0.402310683	4.235420855	7.617657297	18.24003729	18.27433078	24.2659755	29.9402987	44.85125565	51.16311182	58.91890654	56.44760116	56.48092251	56.61781113	51.87178579	35.13650898	12.66183509	26.74496336
15:37:58.107	0.403422218	0.402334385	4.237116799	7.620296219	18.24653733	18.28048213	24.27496826	29.95110835	44.87010603	51.17699168	58.93760062	56.46594961	56.49468046	56.63327991	51.87774014	35.13278369	12.66036508	26.74109495
15:37:59.078	0.403597115	0.402536866	4.239039701	7.62308183	18.25364688	18.28815006	24.28747599	29.96676377	44.89407117	51.21258907	58.97438733	56.49968297	56.52625291	56.67217531	51.90663807	35.14990352	12.66807446	26.75235005
15:38:00.061	0.403835213	0.402239851	4.240357817	7.625249414	18.25842278	18.29272825	24.29223093	29.97543665	44.90910978	51.22346067	58.99322467	56.51199959	56.53874302	56.68735845	51.91092013	35.14744113	12.66739412	26.74882907
15:39:15.540	0.417695439	0.413710431	4.348054259	7.798848359	18.64130307	18.67406127	24.84512684	30.67283542	45.9941903	52.47042217	60.41677529	57.85432046	57.87065035	58.00726364	52.94723275	35.68575253	12.95303145	27.10884428
15:39:16.520	0.419466862	0.418181261	4.350206232	7.80139304	18.64673489	18.68151382	24.85675097	30.68875981	46.00880774	52.50099244	60.4534378	57.89473512	57.89832095	58.03863722	52.98797578	35.70530711	12.95838649	27.12439396
15:39:17.491	0.419967582	0.417716439	4.35190503	7.804777898	18.65320394	18.68925181	24.86618507	30.6998471	46.02125807	52.51867088	60.47061153	57.91450927	57.91549513	58.05670022	53.00033762	35.70961954	12.96103152	27.12733771
15:39:18.477	0.419889474	0.418097997	4.35322587	7.806678782	18.65794512	18.6926588	24.8719449	30.70826134	46.02924601	52.53403433	60.48526633	57.92471938	57.92632624	58.06515568	53.0069928	35.71108444	12.96332448	27.1282384
15:39:19.447	0.420313683	0.419577326	4.355126122	7.810059263	18.6660232	18.70070742	24.88423204	30.72350321	46.05990846	52.56294535	60.5307977	57.96334295	57.9652068	58.10537606	53.04356783	35.73469815	12.97374552	27.14525652
15:39:20.429	0.420528305	0.419803281	4.356623276	7.812344196	18.66962244	18.70563554	24.89031586	30.73148422	46.06839327	52.57407891	60.54391699	57.97512898	57.97553139	58.11202781	53.0498341	35.73648512	12.97809625	27.14498367
15:39:21.399	0.420576625	0.420155784	4.357994677	7.814081859	18.67390095	18.70880428	24.89505833	30.73664792	46.07817074	52.58493442	60.55198354	57.97686826	57.97820061	58.11663556	53.04510691	35.72971176	12.97570461	27.13842902
15:39:22.369	0.42063825	0.419330181	4.359920078	7.816993228	18.68110387	18.71558425	24.9059676	30.75052111	46.10251765	52.60609099	60.58899716	58.00962458	58.01074111	58.1493633	53.07563397	35.74773283	12.98150001	27.15157815
15:39:23.354	0.420769704	0.420900941	4.361190522	7.819288937	18.68647323	18.72159925	24.91333994	30.75993602	46.11807256	52.62158865	60.60028096	58.0178245	58.02086186	58.15593725	53.08027314	35.74741607	12.98219185	27.15071792
15:39:24.337	0.421074132	0.420120634	4.362712805	7.821992647	18.69260026	18.7271031	24.92178605	30.77260476	46.13968304	52.64712959	60.63286378	58.04737263	58.05238468	58.18434953	53.1071554	35.76241654	12.98938088	27.16066354
15:39:25.307	0.421548222	0.420202119	4.364537446	7.824740337	18.69911593	18.73535198	24.93247926	30.7859602	46.16403706	52.66596287	60.65751621	58.07453336	58.07746946	58.211642	53.1295958	35.77739373	12.99623591	27.17075748
15:39:26.278	0.421822726	0.421225728	4.365732513	7.826944761	18.70444526	18.73916113	24.9415104	30.79557791	46.1803501	52.68000439	60.67203101	58.09137291	58.09230949	58.22677753	53.14172776	35.78222543	12.99979791	27.17331404
15:39:27.260	0.421684747	0.420152191	4.367431055	7.829089957	18.70833488	18.74520207	24.9478387	30.80265708	46.19428621	52.69421173	60.68529193	58.10152857	58.10532117	58.24130573	53.14852043	35.78393797	13.00312788	27.17374809
15:39:28.242	0.421975862	0.420859457	4.369104404	7.832057595	18.71656403	18.75008452	24.96108842	30.81986353	46.22471562	52.7284148	60.72573618	58.14715469	58.1447548	58.28261114	53.18820719	35.81007322	13.01530567	27.1942188
15:39:29.213	0.422509813	0.421532539	4.370274265	7.834700467	18.71935936	18.75481901	24.96396244	30.82412518	46.23151402	52.73599262	60.735182	58.15410769	58.1541173	58.29188258	53.19122197	35.8104013	13.0165084	27.19485427
15:39:30.185	0.422288692	0.422037196	4.371494467	7.835454053	18.7220665	18.75966985	24.96637549	30.82441575	46.23135598	52.73066609	60.72418498	58.1429722	58.13959333	58.27512471	53.17332281	35.79546207	13.01161491	27.18078906
15:39:31.166	0.422543214	0.421585192	4.372261268	7.838574375	18.72665484	18.76210603	24.97384085	30.83453122	46.24777348	52.75095494	60.74742063	58.16638151	58.162139	58.30405339	53.19369906	35.80806209	13.01808481	27.19053438
15:39:32.134	0.422628117	0.42214542	4.373909597	7.840449374	18.7308714	18.76742955	24.97870044	30.84174638	46.25868791	52.75926258	60.76389934	58.17534482	58.17200915	58.31477741	53.20095202	35.81076596	13.02131214	27.19289107
15:39:33.121	0.422999045	0.421811387	4.375456922	7.843008829	18.735603	18.77172249	24.98637055	30.85054228	46.26845337	52.77556647	60.78522756	58.19391816	58.19069895	58.33020616	53.21484448	35.81745131	13.0264182	27.19848683
15:39:34.092	0.423256905	0.422439998	4.376324569	7.844331785	18.73888262	18.77496834	24.98844533	30.85270144	46.27024247	52.77426833	60.7821445	58.18788882	58.18687573	58.33163347	53.20629144	35.80983657	13.02342737	27.19191886
15:39:35.072	0.423305196	0.423392598	4.377720889	7.84669725	18.74404928	18.77939122	24.9955478	30.86011393	46.28352913	52.78790302	60.79395321	58.19983675	58.19735147	58.34720644	53.21729882	35.81417206	13.02640399	27.19534113
15:39:36.042	0.423642883	0.423148354	4.379495057	7.848977902	18.74910227	18.78551687	25.00208319	30.86951381	46.28880781	52.8056914	60.81409936	58.21922835	58.21700839	58.36225321	53.23311819	35.82266568	13.03160803	27.20228628
15:39:37.012	0.423857499	0.422523683	4.380085707	7.850789511	18.75165963	18.78748784	25.00606474	30.87355822	46.29408645	52.81027298	60.82209295	58.223085	58.22109647	58.36611183	53.23271992	35.82123703	13.03052807	27.1995336
15:39:38.000	0.424158564	0.423042832	4.381507069	7.852803479	18.75714548	18.7925506	25.01365585	30.88485587	46.30508835	52.82589167	60.84036757	58.23910467	58.24414673	58.38942768	53.25094113	35.83249967	13.03412801	27.20907753
15:39:38.964	0.424127048	0.423641518	4.383432379	7.855699438	18.76255998	18.79885781	25.02379463	30.89694266	46.32711267	52.85414973	60.86629606	58.27012112	58.27562051	58.4177425	53.2798864	35.85210371	13.04187725	27.22262625
15:39:39.952	0.424364913	0.42324508	4.384652275	7.857427599	18.76660712	18.80272329	25.02745448	30.90113305	46.3323572	52.85643819	60.87048024	58.26924793	58.27635721	58.42263147	53.27797305	35.84738192	13.04042234	27.21821712
15:39:40.922	0.424423194	0.423723214	4.386048683	7.859522747	18.77210615	18.80699793	25.03567069	30.91051564	46.34747768	52.87485429	60.89002938	58.29021409	58.29631772	58.44031796	53.29450205	35.85921565	13.04559522	27.22649593
15:39:41.908	0.4244881	0.424250903	4.387621121	7.862021	18.7765879	18.81182125	25.04159033	30.91827642	46.3621751	52.89956141	60.90570499	58.31025313	58.31409381	58.45709914	53.31196729	35.86963699	13.05053165	27.23498602
15:39:42.875	0.425015368	0.423490321	4.388891651	7.864210005	18.78037841	18.8162449	25.04862068	30.92760937	46.37876953	52.90711655	60.92315472	58.33056787	58.33182342	58.47240982	53.32900052	35.88312871	13.05495064	27.24455895
15:39:43.862	0.425239923	0.423699139	4.389482017	7.865349145	18.78306322	18.81796189	25.0507561	30.92878012	46.37787513	52.90492808	60.92539452	58.33099827	58.33225586	58.46776105	53.32885095	35.88387523	13.05465253	27.24528545
15:39:44.832	0.425278242	0.424440565	4.39067695	7.866719993	18.7845869	18.82010738	25.05170808	30.92885351	46.37970209	52.90561569	60.92180576	58.324643	58.32863533	58.46782397	53.32499364	35.88007109	13.05374602	27.24199911
15:39:45.817	0.425299907	0.423241417	4.391166614	7.866986594	18.78337303	18.82057558	25.04799643	30.92168354	46.36548447	52.88649638	60.89661836	58.2967754	58.30274943	58.43997514	53.29804504	35.85941522	13.04713128	27.22750621
15:39:46.797	0.425850425	0.425141163	4.392285852	7.86868654	18.78644301	18.8224549	25.04985356	30.92560839	46.37113486	52.89556335	60.90475129	58.30578935	58.31291998	58.4516199	53.30779192	35.87028249	13.05178288	27.23595685
15:39:47.768	0.425616003	0.424320745	4.392800886	7.870192582	18.78835116	18.82583623	25.05312859	30.92948508	46.37636696	52.90285943	60.91262075	58.31909615	58.32334606	58.45833806	53.32413703	35.88372402	13.05753181	27.2480634
15:39:48.738	0.425787363	0.424884348	4.393441832	7.870919873	18.78781091	18.82383371	25.04991935	30.92341951	46.36469484	52.8919567	60.89890238	58.29851047	58.30572966	58.44411122	53.3067428	35.8752683	13.05474766	27.24166919
15:39:49.707	0.426144981	0.425452222	4.394082788	7.871328701	18.7878491	18.82340375	25.04544578	30.91660356	46.35439734	52.87635308	60.88034961	58.27727338	58.28537529	58.42936764	53.28969243	35.86441273	13.05112908	27.23408804
15:39:50.703	0.426306316	0.424873697	4.395226955	7.872685673	18.78894474	18.82609056	25.0472709	30.91875661	46.36139612	52.87796642	60.882827	58.28373089	58.2919924	58.43686195	53.29994032	35.87488202	13.05488113	27.24277653
15:39:51.673	0.42668721	0.42482864	4.395565729	7.87315118	18.78906211	18.8245475	25.04231203	30.91162362	46.34486064	52.85687622	60.86314653	58.26010396	58.26945751	58.41154682	53.27748432	35.8597707	13.04998598	27.23254094
15:39:52.643	0.426841933	0.42516399	4.396206658	7.874258013	18.78937617	18.82552165	25.04222497	30.90989552	46.34313735	52.84804953	60.86014141	58.25342326	58.26426534	58.40960783	53.27756693	35.86249872	13.05355359	27.236751
15:39:53.613	0.427093108	0.42583358	4.397376356	7.875866557	18.79168361	18.82872178	25.04236826	30.91248791	46.34500255	52.85991231	60.86335142	58.26189623	58.27398168	58.41557817	53.28852936	35.8742824	13.05869928	27.24566946
15:39:54.609	0.426858647	0.426195384	4.397790291	7.876486188	18.79149629	18.82835427	25.04161048	30.90726782	46.33614331	52.84961026	60.85081286	58.24820326	58.258084	58.39931159	53.27559747	35.86864435	13.05633921	27.24172634
15:39:55.579	0.426763921	0.42666408	4.399136233	7.877795866	18.7934338	18.82971664	25.04189591	30.90707445	46.33609978	52.84399256	60.84732177	58.24668248	58.25735431	58.39585461	53.27508457	35.86823007	13.05729588	27.24236164
15:39:56.550	0.427234604	0.426297599	4.399802308	7.878571071	18.79420865	18.82984946	25.04102943	30.90593004	46.33200953	52.83892444	60.8377969	58.23766622	58.24749686	58.38811834	53.26811238	35.86375797	13.05833304	27.24004905
15:39:57.520	0.42750573	0.426010621	4.400669828	7.880216661	18.79597879	18.83303658	25.04124134	30.9060703	46.33033213	52.83486636	60.83558908	58.23391865	58.24042868	58.38454042	53.26217111	35.86148806	13.0575567	27.23808341
15:39:58.517	0.427287899	0.425839861	4.401360704	7.88078825	18.79750581	18.83352958	25.04099803	30.90450327	46.33080276	52.82843513	60.82679641	58.22625451	58.23127532	58.3789882	53.25409505	35.85542939	13.05768352	27.23371346
15:39:59.487	0.42786168	0.425997396	4.40235411	7.882863544	18.79937867	18.83572663	25.04425342	30.90853013	46.33721835	52.83841282	60.83338938	58.23418426	58.24362837	58.38499151	53.26631709	35.8655799	13.06288069	27.24264503
15:40:00.458	0.427570722	0.426467792	4.403146062	7.884908257	18.80231707	18.83877124	25.04546004	30.91055505	46.33813662	52.84101897	60.84064954	58.23624797	58.24705654	58.39228161	53.26933132	35.86912419	13.0639364	27.24656131
15:41:15.840	0.445221839	0.441253539	4.5195037	8.071589867	19.2174574	19.25192399	25.64416918	31.6692048	47.48472236	54.18307654	62.32487893	59.63609618	59.59964764	59.73437734	54.32665031	36.39903883	13.31387343	27.59647387
15:41:16.810	0.444964784	0.443890766	4.521805401	8.074958709	19.22641067	19.26298417	25.66371953	31.68801468	47.52584791	54.20413615	62.36436492	59.67388405	59.64646241	59.7790501	54.3640196	36.42450153	13.32627998	27.61927148
15:41:17.791	0.445056867	0.443780291	4.524157272	8.078560567	19.23378998	19.27084141	25.67360766	31.70153708	47.54450269	54.22614533	62.38912236	59.69548923	59.66574996	59.79780157	54.37281044	36.42329793	13.32863392	27.61786663
15:41:18.773	0.444992663	0.445339784	4.525653241	8.081601922	19.24016844	19.27717193	25.6837797	31.71452563	47.5623633	54.24746984	62.42018181	59.71888541	59.69487018	59.82499725	54.39634663	36.43814749	13.33731259	27.62871558
15:41:19.741	0.445733173	0.444864389	4.527552168	8.083834588	19.24564407	19.28333535	25.69121016	31.72458197	47.57584736	54.2651986	62.43645813	59.73387108	59.71451641	59.8455009	54.41008604	36.44696319	13.33988804	27.63457898
15:41:20.727	0.445881777	0.445421378	4.52856978	8.086247746	19.25010283	19.28623068	25.697242	31.73155065	47.58388487	54.27934404	62.44813454	59.74081569	59.72138348	59.85498072	54.41443342	36.44716885	13.34139505	27.63458698
15:41:21.692	0.44619001	0.445142555	4.530116315	8.088672368	19.25611566	19.29293761	25.70605906	31.74232423	47.59256182	54.2924754	62.46802612	59.75987379	59.73915498	59.87579287	54.43032563	36.45672687	13.3457237	27.64114398
15:41:22.677	0.446275435	0.444590228	4.53158703	8.090756233	19.26051866	19.29741772	25.71283551	31.75042667	47.60311773	54.30774229	62.48566832	59.77148737	59.74997565	59.89359636	54.43780996	36.46128599	13.34704696	27.6436988
15:41:23.649	0.446330945	0.444956647	4.533183788	8.093134836	19.26534232	19.30292732	25.71991733	31.75888135	47.61711135	54.32075899	62.50339319	59.79016273	59.76972118	59.9060162	54.45745532	36.47309397	13.35241591	27.65224174
15:41:24.634	0.446203559	0.445117939	4.533823799	8.09424826	19.26725377	19.30575145	25.72019798	31.75896409	47.62050896	54.31660227	62.49533275	59.78261218	59.75808809	59.90126776	54.44545463	36.46538448	13.35143682	27.64542293
15:41:25.600	0.446721272	0.445598881	4.535043045	8.096304259	19.27036989	19.30690179	25.72278842	31.76010042	47.62008891	54.31753166	62.49624457	59.78011689	59.7571053	59.8953602	54.44163249	36.46227796	13.35262261	27.64384619
15:41:26.572	0.446996242	0.446114853	4.536211852	8.097677524	19.27308935	19.30980455	25.72572584	31.76290296	47.62437547	54.3218122	62.49895469	59.7816912	59.760378	59.89953338	54.44502128	36.46342513	13.35311845	27.64478891
15:41:27.559	0.447005183	0.446094104	4.537531462	8.100121081	19.27750084	19.31462068	25.73024349	31.76968762	47.63541867	54.33505931	62.51456149	59.79770097	59.77327565	59.91792932	54.46074752	36.47562695	13.35852168	27.65433023
15:41:28.540	0.447296766	0.446628865	4.538876324	8.101954199	19.28004052	19.31734154	25.73518806	31.77502274	47.6471045	54.34181518	62.5238293	59.81170395	59.78723952	59.92562878	54.4743457	36.48651846	13.36250043	27.66269875
15:41:29.510	0.44744538	0.446220991	4.539717903	8.103229357	19.28322666	19.31945526	25.73515221	31.7747745	47.64433281	54.34148717	62.52077532	59.80323564	59.77875407	59.91761982	54.46463832	36.47767302	13.3616067	27.65704154
15:41:30.480	0.447487589	0.446380585	4.540634991	8.105317892	19.28633941	19.32411745	25.73974548	31.78097835	47.65177126	54.3467213	62.52645901	59.81485351	59.7886161	59.93250262	54.47466721	36.48423722	13.36343234	27.66173108
15:41:31.465	0.447519807	0.446772616	4.542609064	8.107312232	19.29021979	19.32792457	25.74486575	31.78712958	47.65957914	54.35971068	62.5361719	59.82956054	59.80399744	59.94478544	54.4900043	36.49522706	13.36757809	27.66904574
15:41:32.447	0.447259418	0.446727942	4.54334976	8.108652449	19.29305568	19.32868539	25.74769877	31.79109723	47.66812036	54.36603982	62.53703822	59.82901402	59.8014379	59.94852608	54.48530829	36.49083245	13.36652891	27.66577403
15:41:33.417	0.448485361	0.446509795	4.544644401	8.111368968	19.29759159	19.33491924	25.75501545	31.80023514	47.68289168	54.3775198	62.55198383	59.84508299	59.8192568	59.9624849	54.49755784	36.49608563	13.36892439	27.66975682
15:41:34.386	0.448620671	0.446821508	4.545712506	8.11347056	19.30193387	19.34031226	25.76002993	31.80695573	47.6885368	54.38492939	62.55823756	59.8499693	59.82430391	59.96310721	54.4963679	36.49216252	13.36746908	27.66552644
15:41:35.373	0.448975416	0.447893798	4.548366136	8.116799331	19.31137775	19.34955875	25.77583317	31.82629362	47.72412687	54.42147751	62.61039252	59.89713771	59.86842074	60.00353547	54.53952199	36.52145519	13.38075751	27.68589393
15:41:36.338	0.448871323	0.446828744	4.549962878	8.120287873	19.31892176	19.35559233	25.78702489	31.8422674	47.7507799	54.452616	62.65023006	59.93036176	59.90154654	60.04101307	54.57189725	36.53922421	13.39013416	27.69955694
15:41:37.324	0.449119666	0.448218087	4.55153413	8.122663702	19.32539003	19.36356456	25.79929625	31.85538661	47.76775091	54.47663813	62.68053779	59.95657568	59.92848178	60.06257403	54.5928655	36.54915	13.3957725	27.70705788
15:41:38.294	0.44946445	0.448561412	4.553558688	8.125986337	19.33118753	19.3698046	25.80693578	31.86727474	47.79179989	54.49292775	62.70458845	59.9782348	59.95015127	60.09332056	54.6090294	36.55870661	13.40050514	27.71314707
15:41:39.280	0.449433486	0.447980897	4.555205431	8.128575829	19.33743855	19.37588806	25.81825663	31.88082713	47.80918248	54.52160293	62.73389803	60.00319963	59.97531212	60.1126711	54.62979126	36.56969582	13.40631065	27.72090124
15:41:40.244	0.449921251	0.449288211	4.556928002	8.132360872	19.34705413	19.3855177	25.83315116	31.90036811	47.83544551	54.55697912	62.78077443	60.05531346	60.02435066	60.15898717	54.67272036	36.59842162	13.4181834	27.74177714
15:41:41.230	0.449810485	0.449513579	4.558625066	8.134357209	19.35111889	19.38919496	25.83900041	31.90700167	47.84207644	54.56141051	62.781521	60.05422155	60.02320774	60.15910796	54.6645657	36.58739772	13.41514967	27.73265174
15:41:42.216	0.450328149	0.44985346	4.560598998	8.137792709	19.36111405	19.39851868	25.85195694	31.9264552	47.87079708	54.60051311	62.82651599	60.10393865	60.07325167	60.20879116	54.7091375	36.61626909	13.42786983	27.75520517
15:41:43.185	0.450732778	0.448937968	4.561692193	8.139673914	19.36444649	19.40120767	25.85827363	31.9310576	47.87409066	54.60839202	62.82829235	60.10176655	60.07115131	60.19955026	54.69858285	36.60406	13.42376945	27.74336162
15:41:44.168	0.450728415	0.448691606	4.563515123	8.142036622	19.36901021	19.40787322	25.86393203	31.93962523	47.88526211	54.62218691	62.83808109	60.112509	60.07821923	60.21576735	54.70038798	36.60018449	13.42421905	27.73935637
15:41:45.137	0.450940191	0.449952749	4.564784496	8.144325564	19.37390954	19.41045866	25.86998899	31.94799512	47.9019618	54.632297	62.8518195	60.12021625	60.08716693	60.21484908	54.70237956	36.59640959	13.42233001	27.73513925
15:41:46.123	0.451547623	0.450065308	4.566808725	8.14693892	19.38142198	19.41890252	25.88165199	31.96311364	47.92567601	54.66333619	62.88664485	60.15543862	60.12033333	60.25208559	54.73184024	36.6182316	13.43022064	27.75063939
15:41:47.093	0.451589821	0.449783067	4.568279428	8.150339875	19.38860406	19.42611227	25.89343947	31.9782014	47.94844853	54.68952491	62.92303699	60.19017748	60.15188304	60.28500641	54.76162496	36.63555392	13.43694957	27.76363451
15:41:48.075	0.451592106	0.450144312	4.569624092	8.152746155	19.39333202	19.43162643	25.89932302	31.98508505	47.95896337	54.70350997	62.93687304	60.20070242	60.15722764	60.29398898	54.76578812	36.63664983	13.43868959	27.76304249
15:41:49.044	0.451923578	0.450807236	4.571522687	8.155588883	19.39936089	19.4364625	25.90781403	31.99720538	47.98120923	54.72539278	62.96298036	60.22952435	60.18452018	60.32000538	54.7913602	36.65117727	13.44495394	27.77397104
15:41:50.015	0.45227167	0.451471863	4.572263411	8.157014203	19.40133139	19.44086503	25.91110785	32.00027323	47.98811039	54.72627331	62.96573292	60.23022785	60.18733436	60.32449487	54.79101571	36.64888601	13.44709707	27.77200684
15:41:50.985	0.45243689	0.45104349	4.573658568	8.15908061	19.40723392	19.44475666	25.91942715	32.00840899	48.00169557	54.74577835	62.9831935	60.24509889	60.20469331	60.33791161	54.80532349	36.6573784	13.45072885	27.77914879
15:41:51.980	0.452801579	0.45195933	4.575456066	8.162748977	19.41403523	19.45244918	25.93126467	32.02554227	48.02649675	54.77765393	63.02288327	60.2813477	60.24819309	60.37874916	54.84670846	36.68600025	13.46452575	27.80067376
15:41:52.950	0.452886998	0.451695035	4.576826035	8.164235341	19.41889599	19.45608849	25.93616989	32.03141067	48.04089792	54.78839027	63.03451469	60.29193018	60.26068652	60.38832866	54.85716976	36.6930085	13.46883259	27.80568239
15:41:53.922	0.453225109	0.452441691	4.577919096	8.166757369	19.42289975	19.46051019	25.94074174	32.03779545	48.04794323	54.79831856	63.04101604	60.30034069	60.26790876	60.39371883	54.86067087	36.69415485	13.47135545	27.80621114
15:41:54.893	0.453237377	0.451998791	4.579414882	8.168317819	19.42680967	19.46436925	25.94658224	32.04381359	48.05508794	54.81044468	63.04779619	60.30886001	60.27249609	60.40562845	54.86522528	36.69488086	13.47311029	27.80600671
15:41:55.875	0.453728422	0.452601865	4.58136355	8.170597508	19.4342867	19.47019352	25.95511505	32.05719784	48.07530659	54.83545014	63.07339783	60.33490763	60.30150556	60.42316291	54.88896164	36.71044503	13.48037094	27.81694687
15:41:56.861	0.453830445	0.452534956	4.582758415	8.172955566	19.4379694	19.47381198	25.96201624	32.06294653	48.08461343	54.85142816	63.08099413	60.34125044	60.30147607	60.42720689	54.88728539	36.70429361	13.47861722	27.81207466
15:41:57.830	0.453902562	0.452060442	4.583851489	8.175394759	19.4432291	19.48111828	25.96850332	32.07163193	48.09642769	54.8686896	63.09799384	60.35324388	60.31645231	60.4391278	54.89502225	36.70420365	13.48133629	27.81132381
15:41:58.800	0.45422737	0.452300339	4.585749963	8.178603605	19.44939535	19.48717621	25.97842848	32.08445112	48.11242251	54.896176	63.12205174	60.37500692	60.34009353	60.46480087	54.91061111	36.71341288	13.48594647	27.81562569
15:41:59.780	0.453810716	0.452809408	4.586918365	8.180495167	19.45300507	19.48936575	25.98130427	32.08886704	48.116886	54.89714235	63.12472184	60.3743496	60.33606254	60.46299817	54.90080923	36.70154909	13.4818394	27.80632793
15:43:15.502	0.471142282	0.46538186	4.693798063	8.347487499	19.79945269	19.83715124	26.44700452	32.66119429	48.96606804	55.86475771	64.188948	61.35938412	61.32135133	61.44154008	55.70121873	37.16653905	13.73830173	28.13151638
15:43:16.487	0.470886762	0.470190262	4.694911617	8.347979402	19.79960793	19.83763441	26.44540282	32.65638618	48.95582406	55.83085446	64.16743445	61.34376442	61.29306066	61.4239182	55.67255728	37.14032206	13.7312715	28.11678276
15:43:17.458	0.471000252	0.470819931	4.697006528	8.351056686	19.80533348	19.84407222	26.45486613	32.66640836	48.96902464	55.84490006	64.18873657	61.36873102	61.31547887	61.44481503	55.69291989	37.15356977	13.74036006	28.12752096
15:43:18.438	0.471010688	0.470690049	4.698120058	8.353663197	19.80858348	19.84933362	26.45951208	32.67351543	48.97983043	55.8616812	64.19836693	61.37557488	61.32234489	61.45482103	55.69728431	37.15598665	13.74405493	28.12904854
15:43:19.424	0.471765814	0.471581975	4.69933429	8.354791704	19.81221216	19.85097429	26.46184744	32.67714029	48.98100365	55.86063006	64.20165972	61.37731835	61.32130814	61.45368349	55.69544622	37.15135609	13.7435059	28.12625731
15:43:20.393	0.472005636	0.47055076	4.700951062	8.356986058	19.81644155	19.85536232	26.4665903	32.68366258	48.98978074	55.87254598	64.21119307	61.38736347	61.32918757	61.46267863	55.69921591	37.15231472	13.74369416	28.12619946
15:43:21.366	0.471986149	0.471590507	4.702341375	8.359939133	19.82168615	19.8595307	26.47379663	32.69193542	49.00144835	55.89120976	64.22461694	61.40391982	61.34289255	61.47749816	55.70902759	37.15636394	13.74511664	28.12852716
15:43:22.346	0.47250191	0.47139313	4.703907895	8.362959888	19.82890246	19.8670618	26.48683082	32.70865895	49.03308271	55.91902027	64.25956502	61.43962997	61.38324333	61.50742821	55.74662359	37.18100996	13.75496445	28.14768827
15:43:23.316	0.472625376	0.470930069	4.705776339	8.365760338	19.8356314	19.87454077	26.49720029	32.72124802	49.05352105	55.94282867	64.28591642	61.46931721	61.41255093	61.53254499	55.76916036	37.19339212	13.76126848	28.15741337
15:43:24.302	0.472792068	0.472739547	4.707670056	8.367930951	19.840771	19.8789555	26.50403105	32.72892302	49.06071176	55.9600252	64.2990877	61.48023062	61.42113911	61.54511141	55.77469177	37.19659983	13.76307451	28.15863396
15:43:25.273	0.473001973	0.472105614	4.709513351	8.371088963	19.8474619	19.88685487	26.51558087	32.74247907	49.08451348	55.97859937	64.33372511	61.51431294	61.45424598	61.57886594	55.80869472	37.2197626	13.77055293	28.17678247
15:43:26.254	0.473238478	0.472493459	4.709695793	8.372034317	19.84835342	19.88657497	26.51273029	32.73992046	49.0818047	55.96858112	64.31388176	61.49380981	61.43173044	61.55405697	55.78023948	37.19794743	13.76247432	28.15910373
15:43:27.224	0.473488277	0.471909085	4.71136293	8.373936598	19.85236296	19.89139642	26.51803669	32.74704335	49.09161139	55.97330141	64.32887221	61.50884687	61.44725909	61.56957984	55.79588729	37.20802995	13.7669413	28.16746924
15:43:28.211	0.473704839	0.471810801	4.712703029	8.376292557	19.85665192	19.89561082	26.52395202	32.75395208	49.10154772	55.98507316	64.34401139	61.52410111	61.46121694	61.58242096	55.81130569	37.21981758	13.77117872	28.17602029
15:43:29.182	0.474084296	0.472441292	4.713892035	8.378539318	19.86100771	19.89882227	26.52842613	32.75992526	49.11300177	55.99965717	64.35548674	61.52964269	61.4701094	61.5937348	55.81832515	37.22357006	13.77395932	28.17898773
15:43:30.147	0.473921852	0.473489555	4.715030675	8.379604393	19.86228291	19.90163902	26.52934455	32.76053101	49.11197852	55.9988737	64.35004698	61.52726227	61.46522312	61.58545439	55.81236805	37.21871813	13.77240145	28.17518478
15:43:31.132	0.473749444	0.472196069	4.715791961	8.381657311	19.86662464	19.90584045	26.5366652	32.76705627	49.12254024	56.01489347	64.36377496	61.5368192	61.47943428	61.60206494	55.82508586	37.22793428	13.77700629	28.18167001
15:43:32.104	0.474072385	0.47327336	4.717735953	8.38427036	19.87288448	19.9097568	26.54562997	32.7795797	49.14085834	56.03149521	64.39191945	61.55853027	61.50175095	61.62688488	55.8471418	37.24199748	13.78374564	28.19268757
15:43:33.090	0.474581508	0.473064013	4.719201892	8.386770227	19.87638432	19.91574948	26.5491851	32.78420524	49.14903289	56.03814464	64.39993782	61.56434327	61.5068437	61.6298464	55.84665395	37.24025984	13.78118825	28.19018952
15:43:34.057	0.475024132	0.473453577	4.720692878	8.388692132	19.88142357	19.92097832	26.55919743	32.79591146	49.16878482	56.06701965	64.42694301	61.58545746	61.53295978	61.65553458	55.87106733	37.25640025	13.79045199	28.20250014
15:43:35.044	0.474914892	0.47457525	4.721705846	8.390732019	19.88543396	19.92232826	26.56266948	32.79908724	49.17277993	56.06728023	64.42547775	61.58654985	61.53420252	61.65570473	55.86540707	37.24937117	13.78891833	28.19697654
15:43:36.015	0.475118151	0.474201045	4.723071036	8.392935221	19.89047928	19.92748618	26.56800082	32.80639414	49.18482124	56.07973481	64.43842255	61.59778875	61.53904232	61.66535911	55.86894772	37.24906849	13.78891038	28.1959588
15:43:37.000	0.475451076	0.473891746	4.724939637	8.395175668	19.89659895	19.93390569	26.57585064	32.81646984	49.1982506	56.09300865	64.45487583	61.61032999	61.55593827	61.67651881	55.87887329	37.25301788	13.7900765	28.19799235
15:43:37.966	0.476026684	0.474946806	4.726531296	8.397681858	19.90143582	19.9389923	26.58336564	32.82700956	49.20878945	56.11128029	64.47390571	61.62715764	61.56984586	61.69719575	55.89067613	37.25726506	13.79207901	28.20013365
15:43:38.953	0.476200032	0.474444431	4.728072762	8.400170878	19.90674885	19.94529555	26.59235189	32.83868576	49.22445343	56.13194094	64.49926643	61.65169037	61.59317523	61.7209274	55.90977913	37.26771722	13.79842778	28.20877773
15:43:39.923	0.476293582	0.475000565	4.729488293	8.402363193	19.91164753	19.94932837	26.5995442	32.84527612	49.2320865	56.13943008	64.51081296	61.65826291	61.60267551	61.72712008	55.91288493	37.26672225	13.79968507	28.20696036
15:43:40.906	0.476476902	0.474678456	4.731432397	8.405338348	19.91791097	19.95761021	26.60842244	32.85861865	49.25321121	56.16283669	64.53504085	61.68795033	61.62894307	61.75754439	55.93489461	37.27841089	13.80586878	28.21667087
15:43:41.874	0.476690137	0.475546405	4.733049252	8.408352566	19.92446424	19.96330486	26.61893978	32.87132578	49.27011075	56.18524471	64.55750162	61.71432778	61.65571754	61.79108996	55.96196265	37.29620763	13.81360497	28.22950097
15:43:42.860	0.477072933	0.475442989	4.733735082	8.409413609	19.92710761	19.96605809	26.61992922	32.87281844	49.26915611	56.18316272	64.55648303	61.70993991	61.65047611	61.77684187	55.94909314	37.28467853	13.80862651	28.22020567
15:43:43.831	0.476993608	0.475598449	4.735578458	8.412573949	19.93213257	19.96944439	26.6290366	32.88322606	49.28464469	56.19812835	64.57195244	61.7280156	61.66944926	61.79900224	55.96702933	37.29562601	13.81517168	28.22795762
15:43:44.812	0.477462842	0.475850424	4.736239096	8.413975042	19.93497818	19.97353599	26.63060835	32.88591813	49.28796102	56.20329817	64.57637158	61.72514698	61.66623424	61.79571077	55.9617583	37.29141604	13.8144658	28.22382053
15:43:45.782	0.477370218	0.476656844	4.738459966	8.416461717	19.94081579	19.97954766	26.6394415	32.89469232	49.30521137	56.21478903	64.59342052	61.7460442	61.68814551	61.81790411	55.9812279	37.30273441	13.82078185	28.23466454
15:43:46.753	0.477553534	0.476731142	4.73869272	8.417834352	19.94251685	19.98045734	26.64089966	32.89819973	49.31057168	56.22095576	64.59851298	61.75012079	61.69333984	61.82165706	55.98424207	37.30601687	13.82485639	28.23711197
15:43:47.739	0.477939658	0.477452951	4.740183882	8.419431736	19.94546246	19.98333351	26.64431332	32.90340946	49.31394901	56.22957832	64.60913364	61.7619567	61.70061075	61.82840989	55.99219926	37.31140014	13.82639803	28.24010492
15:43:48.718	0.478292534	0.477027484	4.741775667	8.421981768	19.95065213	19.98946851	26.65109558	32.90990164	49.32869016	56.23947823	64.62977524	61.78095488	61.72120468	61.85080087	56.01418604	37.32919601	13.83415858	28.25374711
15:43:49.688	0.477977162	0.477047962	4.74288924	8.422937992	19.95230037	19.99066916	26.65210316	32.91017545	49.32955833	56.23722702	64.62031541	61.77200905	61.71211367	61.84134447	56.002736	37.31927506	13.83047053	28.24722502
15:43:50.674	0.47838656	0.477180321	4.744254582	8.425690881	19.95722046	19.99529134	26.65928287	32.92155245	49.35476332	56.25870632	64.65012981	61.80620013	61.74334542	61.87243898	56.03900365	37.3484689	13.84296765	28.26767714
15:43:51.644	0.478536631	0.477906418	4.744286007	8.425740161	19.95660383	19.99451324	26.65545199	32.91514242	49.33590117	56.24246633	64.62626658	61.77701528	61.71556192	61.8456302	56.00757379	37.32430611	13.8358782	28.25130594
15:43:52.622	0.478956001	0.477541609	4.746028799	8.428519124	19.96205757	20.001476	26.66225388	32.92485157	49.34821703	56.26063846	64.64755552	61.79899778	61.74096826	61.8686146	56.03287907	37.3450195	13.84426614	28.26500136
15:43:53.591	0.478913245	0.478008008	4.746689381	8.429150503	19.96261736	20.00223692	26.66243867	32.92257506	49.34731579	56.25473306	64.64014778	61.79450127	61.73081349	61.85857579	56.02477048	37.33848602	13.84400015	28.26319731
15:43:54.562	0.479262796	0.47842229	4.747274478	8.430095856	19.96274596	20.00088334	26.65748148	32.9172652	49.33645407	56.23788779	64.61646581	61.76933166	61.70865294	61.8388772	55.9999548	37.3206777	13.83883637	28.24938504
15:43:55.550	0.478954081	0.477652552	4.748564348	8.431686762	19.96537489	20.00483962	26.66173293	32.92245882	49.34473537	56.24930166	64.62733242	61.77943127	61.7186086	61.85170715	56.01152793	37.33100582	13.84382883	28.25672257
15:43:56.514	0.479712556	0.479226055	4.7498289	8.433462685	19.96970445	20.00821932	26.66897921	32.9296492	49.35934689	56.2624064	64.64663413	61.80152219	61.73636602	61.86946077	56.03312599	37.34791219	13.85104473	28.26985895
15:43:57.501	0.480062116	0.478477678	4.751395603	8.43586898	19.97225709	20.01044899	26.67075257	32.93090901	49.35775923	56.26390024	64.64806248	61.80451372	61.73659553	61.86412515	56.03176834	37.34721286	13.85307337	28.26958649
15:43:58.471	0.479833183	0.479288321	4.752257536	8.437272177	19.97594149	20.01517405	26.67371921	32.93491667	49.3689921	56.26803821	64.65014479	61.80164502	61.74082736	61.8662077	56.03459941	37.34765186	13.85469583	28.27110092
15:43:59.459	0.480252561	0.478668936	4.753195087	8.438457585	19.97593294	20.01506931	26.67312725	32.93157611	49.35809984	56.2572918	64.6352536	61.7835836	61.72013549	61.84756385	56.01326199	37.33332893	13.8511766	28.25943347
15:45:15.057	0.49550366	0.49800182	4.859300189	8.603653529	20.31494742	20.3557902	27.13054546	33.50277701	50.18937878	57.20489647	65.65524606	62.73051941	62.64938877	62.77806543	56.75379462	37.73669972	14.08818364	28.54113541
15:45:16.036	0.497308221	0.495910032	4.8605325	8.607164837	20.32429048	20.36357882	27.14455003	33.51520134	50.20852133	57.21792654	65.69196393	62.77052432	62.69132569	62.81458919	56.78727296	37.75785772	14.09697788	28.56047064
15:45:17.007	0.497566924	0.495156094	4.862242989	8.610229205	20.33154451	20.37001583	27.15539018	33.52940911	50.23041002	57.23656139	65.72098096	62.79723834	62.7186261	62.84174134	56.80880662	37.77095664	14.10458774	28.56949239
15:45:17.994	0.497569636	0.496110827	4.864532301	8.612000676	20.3348348	20.37841237	27.16006911	33.53309808	50.23744974	57.24173369	65.72261706	62.80018735	62.71902936	62.83741097	56.80528102	37.76595793	14.10155491	28.56500132
15:45:18.962	0.497791771	0.496859646	4.865689119	8.615485831	20.34221792	20.3830063	27.17206515	33.55084013	50.26259469	57.27395311	65.76988628	62.84285179	62.76405709	62.88386891	56.84946972	37.79413753	14.11475525	28.58981371
15:45:19.942	0.497701404	0.497635823	4.86689626	8.617220244	20.34532628	20.38555669	27.17451522	33.55576246	50.27129757	57.27529272	65.77611882	62.84802604	62.76820932	62.89419714	56.85502954	37.7970503	14.11697458	28.59149261
15:45:20.913	0.498362359	0.497018576	4.868380245	8.618747545	20.34922971	20.38885723	27.17939934	33.55988407	50.27448852	57.28636183	65.78099375	62.85097725	62.76988116	62.88940753	56.85196306	37.79311551	14.11725014	28.58776194
15:45:21.884	0.498724116	0.497425673	4.869662894	8.620926734	20.35266957	20.39294674	27.18397979	33.56607298	50.28678409	57.2950884	65.79654787	62.86553835	62.78386054	62.90484631	56.86880531	37.80436012	14.12135583	28.59626387
15:45:22.869	0.498510741	0.497063887	4.87094553	8.622549949	20.35605961	20.39633785	27.18763501	33.57082892	50.29386958	57.30400428	65.80180856	62.8712543	62.79034173	62.9105369	56.87001672	37.80455316	14.12225636	28.59656998
15:45:23.848	0.498686326	0.497429989	4.871825501	8.624563431	20.35912689	20.3993474	27.19199045	33.57510106	50.29581642	57.30358425	65.80661724	62.86997263	62.79170837	62.90917426	56.87148041	37.80400486	14.12314257	28.59594365
15:45:24.820	0.498971619	0.498850341	4.873158481	8.626969363	20.36517508	20.40354039	27.20013193	33.58404091	50.31425766	57.32729596	65.8283843	62.89451574	62.81384176	62.9351279	56.89212111	37.8197982	14.12924787	28.60715048
15:45:25.789	0.499160506	0.49857226	4.874969634	8.629085326	20.37029318	20.41108326	27.20782269	33.59479784	50.32849008	57.33973248	65.85267594	62.91954743	62.83643135	62.95793941	56.91333411	37.83376224	14.13500654	28.61894373
15:45:26.775	0.499372653	0.498846109	4.876579436	8.631489061	20.37429351	20.41583891	27.21396136	33.60305498	50.34139329	57.35414014	65.86609117	62.9349198	62.85197813	62.96907952	56.92447674	37.84030872	14.13824924	28.62324728
15:45:27.756	0.499225769	0.498429638	4.877685906	8.63351126	20.37849626	20.41981851	27.21876756	33.60884445	50.35398449	57.37029665	65.87387646	62.9422094	62.86023237	62.98028624	56.93390355	37.84705323	14.14192953	28.62647176
15:45:28.727	0.499810256	0.498107131	4.878842717	8.635188993	20.38159285	20.42143118	27.22021817	33.61119898	50.35402595	57.36742263	65.87182585	62.93799919	62.85552237	62.9749801	56.92541364	37.83886626	14.14082861	28.6219016
15:45:29.698	0.50002241	0.499467697	4.879974361	8.636827481	20.38469238	20.42480286	27.224304	33.61435378	50.35904664	57.37396341	65.8772829	62.94122138	62.85851079	62.9763544	56.9269924	37.83965334	14.14226182	28.62164877
15:45:30.684	0.500031768	0.499004242	4.88080399	8.638066971	20.38666239	20.42728861	27.2248245	33.61369155	50.3596579	57.36614536	65.87128163	62.9323977	62.84964541	62.96593693	56.91545763	37.82914172	14.13874613	28.61348005
15:45:31.650	0.500227304	0.499014927	4.882388641	8.640588457	20.39232328	20.43234816	27.23424431	33.62528206	50.3730745	57.39169538	65.89143118	62.96285447	62.87861658	62.9975055	56.94310085	37.84844569	14.14793453	28.628458
15:45:32.622	0.500775217	0.498718904	4.883444782	8.642015461	20.39348345	20.43367629	27.23469085	33.62528596	50.37213213	57.38408027	65.88394383	62.95180854	62.86463803	62.98436519	56.92701367	37.83481992	14.14251238	28.61873105
15:45:33.608	0.501043874	0.500428086	4.885130082	8.643719338	20.39746031	20.43901397	27.24131453	33.63104245	50.37853079	57.4011328	65.89017476	62.95660175	62.87208098	62.99239562	56.93092508	37.83545785	14.14332822	28.61827753
15:45:34.588	0.500980099	0.500911256	4.885808713	8.646083831	20.40099412	20.44173898	27.24245692	33.63493136	50.385952	57.39813471	65.89427096	62.95705579	62.87228235	62.99373559	56.93053503	37.83592305	14.14367783	28.61749123
15:45:35.558	0.501607795	0.499377256	4.887645026	8.64840691	20.40530833	20.44664981	27.24994704	33.64407142	50.3929018	57.41499801	65.91267207	62.97394909	62.89350363	63.01689789	56.94945922	37.84874962	14.14885236	28.6273654
15:45:36.544	0.501557313	0.499560551	4.888952822	8.650695088	20.409916	20.45097218	27.25670302	33.6534458	50.40692537	57.43293585	65.93255878	62.99165375	62.90960701	63.03205898	56.96446884	37.85808952	14.15171528	28.63372089
15:45:37.514	0.502091926	0.500577691	4.890537466	8.652671509	20.4152043	20.4564133	27.26528059	33.66363625	50.42296407	57.44968697	65.95335432	63.00621415	62.93011905	63.05215564	56.98218012	37.86864164	14.1573995	28.64138307
15:45:38.499	0.5020082	0.500128752	4.89224793	8.654534542	20.41974156	20.46035412	27.27042995	33.6698096	50.43222201	57.46002583	65.96385665	63.01740881	62.93497895	63.06139458	56.98602285	37.87118312	14.1577242	28.64176904
15:45:39.465	0.502170488	0.50154147	4.89388291	8.657773319	20.42689881	20.46692695	27.27877229	33.6815504	50.4495726	57.48015078	65.98698262	63.04010714	62.95888474	63.09127032	57.00863136	37.88440533	14.16412041	28.65229622
15:45:40.451	0.502319465	0.502342487	4.895366871	8.660392889	20.4327329	20.47325409	27.28800197	33.69327567	50.46680597	57.50152924	66.01359972	63.07104838	62.98526895	63.11826435	57.03254223	37.89846693	14.1731266	28.66395489
15:45:41.422	0.502737722	0.501742305	4.896800511	8.662792271	20.43741388	20.47727895	27.29512487	33.70178242	50.48072448	57.51209333	66.02734027	63.08159387	62.99884196	63.13105399	57.0384914	37.90118218	14.17710001	28.66443485
15:45:42.404	0.50296316	0.501872632	4.898636809	8.665235246	20.44451838	20.48497062	27.30514307	33.71394102	50.49840809	57.53013209	66.05046302	63.10673078	63.02385913	63.15113745	57.05903875	37.91309318	14.18292832	28.67344204
15:45:43.373	0.503288336	0.5030957	4.89999495	8.668138262	20.44885607	20.4881677	27.30904777	33.71929667	50.50670718	57.5420076	66.06245635	63.11299074	63.02993674	63.15550011	57.06169294	37.91212503	14.18543248	28.67202999
15:45:44.344	0.503550347	0.50168043	4.901076254	8.669523837	20.45134536	20.49065342	27.31363832	33.72378549	50.51454083	57.54532012	66.06571226	63.11523595	63.0299872	63.15854399	57.05878643	37.90744857	14.18676241	28.66759312
15:45:45.330	0.503895456	0.502364407	4.90195621	8.671109976	20.45507872	20.49401222	27.317431	33.72649123	50.51811771	57.54333005	66.0652765	63.11335603	63.02831336	63.15377383	57.05047819	37.90059583	14.18595827	28.66171639
15:45:46.309	0.504090975	0.503267957	4.904119677	8.674121991	20.4607661	20.50041049	27.32691036	33.74001691	50.53801265	57.56723059	66.09344746	63.14375523	63.05353326	63.17931808	57.07892018	37.91623984	14.1957796	28.67501422
15:45:47.279	0.504329715	0.502673747	4.90605665	8.677166718	20.46835761	20.50917565	27.33870631	33.75687659	50.57121398	57.60156627	66.1324278	63.17909223	63.09313768	63.21655376	57.11024615	37.93789155	14.20593334	28.69273626
15:45:48.250	0.504212754	0.502798083	4.907943288	8.680573361	20.4755413	20.51472673	27.34980187	33.76928487	50.59596676	57.6280003	66.15516357	63.20341646	63.11957404	63.24531813	57.1318697	37.94955578	14.2104762	28.70141078
15:45:49.236	0.504178891	0.503216352	4.908697408	8.682521416	20.47793677	20.51835068	27.35211043	33.7732578	50.60016098	57.6342366	66.15925783	63.21173508	63.12347093	63.2474916	57.13646715	37.95385226	14.21186146	28.70467468
15:45:50.218	0.504660295	0.503023722	4.910181367	8.683647529	20.4808486	20.51993106	27.35444334	33.77406276	50.60152696	57.62886203	66.1579165	63.20345424	63.11420079	63.23811833	57.12603116	37.94467593	14.20808173	28.69602665
15:45:51.183	0.505617082	0.504051155	4.911413674	8.685658832	20.48457895	20.52476428	27.36066981	33.78016862	50.61414937	57.63773393	66.16589754	63.20852099	63.12189933	63.24678818	57.12793046	37.94373269	14.20958715	28.69572073
15:45:52.168	0.505653028	0.503161336	4.91312413	8.688546564	20.49147812	20.53129191	27.37135451	33.79479523	50.63712327	57.66455881	66.1951669	63.24396376	63.15506889	63.27869243	57.16019285	37.96671832	14.21786263	28.71202935
15:45:53.138	0.505416393	0.50483813	4.913727263	8.689031703	20.49125052	20.53125552	27.36661872	33.78801358	50.62168603	57.64774221	66.16891159	63.21566714	63.12412482	63.24607261	57.12511367	37.93929858	14.21045958	28.69136334
15:45:54.123	0.505452339	0.505028281	4.915412551	8.6912065	20.4954592	20.53433624	27.37179281	33.79475415	50.63259759	57.66193597	66.18096611	63.22821712	63.13582103	63.26159527	57.13444783	37.94495475	14.21305203	28.69625287
15:45:55.088	0.505674457	0.504005997	4.916594523	8.693352975	20.50032502	20.54035293	27.37895003	33.80447802	50.64959632	57.67482011	66.2056439	63.24657448	63.15612984	63.28407547	57.15330291	37.95773163	14.2187423	28.70544725
15:45:56.073	0.506099341	0.505051415	4.918405643	8.695992158	20.5062325	20.54591052	27.38869921	33.8156202	50.66550186	57.69894374	66.22753516	63.26948563	63.17972727	63.30222382	57.1754282	37.97315251	14.22373255	28.71641266
15:45:57.043	0.506008974	0.505103133	4.918933275	8.696959126	20.50712569	20.547465	27.38858258	33.81489069	50.66237842	57.69481421	66.2153235	63.25724647	63.16402726	63.28994084	57.1584262	37.95784614	14.22110869	28.70464747
15:45:58.029	0.506437181	0.505801667	4.920593393	8.699648452	20.51152216	20.55012538	27.39358532	33.82143134	50.66974419	57.70244008	66.22207085	63.26393738	63.17400121	63.29625618	57.1603692	37.95838498	14.22239074	28.70362087
15:45:58.994	0.506765673	0.505186079	4.92210253	8.702047831	20.51729166	20.55766182	27.40207495	33.83185556	50.68473738	57.7165345	66.24623055	63.28186051	63.19263849	63.3178242	57.17801136	37.96933243	14.22922621	28.71172258
15:45:59.981	0.506708537	0.506616004	4.924291147	8.705644128	20.52645884	20.56663399	27.41762397	33.85236801	50.71203343	57.75644922	66.3008026	63.33118945	63.23907553	63.36486713	57.22413963	38.00121712	14.24281921	28.73458637
15:47:15.746	0.52349981	0.524262176	5.032044903	8.874695416	20.87329668	20.91050023	27.88458002	34.43025871	51.56019075	58.72300974	67.3659398	64.30450576	64.19981479	64.32791211	57.96171606	38.38824254	14.46850167	29.00668666
15:47:16.715	0.524483265	0.523466249	5.03420007	8.878181812	20.88333888	20.92375816	27.90652036	34.4569116	51.60068953	58.76491041	67.40944585	64.36406704	64.2535704	64.38089601	58.02578866	38.43413519	14.48772559	29.04101402
15:47:17.684	0.524742097	0.524150352	5.036757879	8.881777204	20.89279719	20.93296781	27.92057392	34.47561107	51.6268793	58.79765526	67.45398723	64.4085495	64.29927481	64.42854109	58.06846808	38.4632188	14.49929235	29.06307095
15:47:18.679	0.52503748	0.524737003	5.036673057	8.882101984	20.89135485	20.93192653	27.91444871	34.46674705	51.60961648	58.77762866	67.42301747	64.37433027	64.26456927	64.39325884	58.03417965	38.43633933	14.49066528	29.04233504
15:47:19.648	0.525176649	0.525155346	5.037897083	8.883525948	20.892736	20.93322079	27.91553086	34.46798924	51.61497163	58.77488191	67.42375295	64.3737387	64.26399115	64.39139234	58.03205877	38.43296632	14.4911847	29.04077033
15:47:20.617	0.525242691	0.524656795	5.038718457	8.884193405	20.89372986	20.93390716	27.91580965	34.46723061	51.61113303	58.77438771	67.41303549	64.36609582	64.25713398	64.3831762	58.02231858	38.42783822	14.4891806	29.03591484
15:47:21.604	0.525873794	0.525443406	5.039640322	8.885287885	20.89391911	20.93432769	27.91334416	34.46226887	51.60424542	58.76140982	67.39772433	64.34744311	64.23650484	64.36785384	58.0048236	38.41499876	14.48492978	29.02538412
15:47:22.585	0.526096055	0.524945696	5.041493355	8.888987695	20.90262868	20.94203648	27.92910151	34.48200095	51.63280634	58.80099127	67.45229551	64.40467313	64.2945661	64.42319005	58.06086698	38.45580046	14.50139121	29.05750027
15:47:23.555	0.526281757	0.525545188	5.043497477	8.891255327	20.90653878	20.94741119	27.93458241	34.49077938	51.64595262	58.81877529	67.47444873	64.42415082	64.31348363	64.44483277	58.0782865	38.46770428	14.50827418	29.06727349
15:47:24.526	0.526377712	0.525218393	5.043966504	8.892275912	20.9092606	20.94955893	27.93440547	34.49055409	51.64399703	58.8153226	67.46774309	64.41536902	64.30637346	64.44203271	58.06872957	38.46079651	14.50830876	29.06199171
15:47:25.512	0.52641383	0.525462389	5.044586379	8.892786119	20.90902737	20.9498954	27.93435008	34.48717639	51.63855784	58.81080577	67.45294955	64.40154369	64.28878247	64.41737252	58.05208104	38.44679513	14.50493488	29.05098133
15:47:26.476	0.52678235	0.525258653	5.045860752	8.894168703	20.91030305	20.95043966	27.9350504	34.48826884	51.63591601	58.80456235	67.44262019	64.3891815	64.27427854	64.40453101	58.03366838	38.43066637	14.50090442	29.03741243
15:47:27.463	0.52660906	0.526166591	5.047386556	8.897521739	20.91839322	20.95937033	27.94692759	34.5039986	51.6595524	58.8261797	67.48205039	64.42661414	64.31532634	64.44588339	58.06868522	38.45520317	14.5105816	29.05601924
15:47:28.434	0.527290024	0.527208701	5.048660853	8.89883226	20.92036686	20.96105243	27.9490529	34.50539059	51.65978473	58.83430359	67.47773887	64.42005619	64.30740592	64.43195486	58.05656554	38.44273337	14.50697014	29.04571463
15:47:29.404	0.527266318	0.526121407	5.050740435	8.90246895	20.92873051	20.96962805	27.96171969	34.52248876	51.68604326	58.86787803	67.5213099	64.45900665	64.34749034	64.48303929	58.09533331	38.46939507	14.51883012	29.06695907
15:47:30.398	0.527777751	0.525878327	5.052819785	8.904975971	20.93500131	20.97709042	27.97167614	34.53299911	51.70393943	58.88482246	67.53815788	64.47995051	64.36671392	64.49745564	58.11245809	38.48006462	14.52363989	29.07464114
15:47:31.367	0.52782717	0.527597189	5.053716611	8.907234841	20.93934555	20.98004649	27.97755369	34.54184405	51.71627768	58.90091435	67.55487585	64.49731294	64.38426441	64.51247422	58.12639989	38.48685154	14.52766923	29.08013769
15:47:32.337	0.528105939	0.527152478	5.055620018	8.910666571	20.94654144	20.98746449	27.98721272	34.55544069	51.73894565	58.92231831	67.57884096	64.52492711	64.40920822	64.54546551	58.15201128	38.50355128	14.53531784	29.09168297
15:47:33.323	0.528414615	0.527987768	5.056567006	8.911741378	20.94836184	20.98873208	27.98869531	34.5564479	51.74187697	58.91866444	67.57220041	64.51305447	64.39870656	64.53489985	58.13712452	38.49167571	14.53146731	29.08165846
15:47:34.287	0.528464037	0.527830172	5.05769035	8.913202395	20.951741	20.99166891	27.9933534	34.56052465	51.74820791	58.92571233	67.57785351	64.52152106	64.40612905	64.54237095	58.13854985	38.4910216	14.53289047	29.08173241
15:47:35.273	0.528968822	0.529063646	5.058763154	8.915508935	20.95647176	20.99681645	27.99884774	34.5684011	51.75784783	58.94137899	67.59340722	64.53698618	64.41881979	64.55331532	58.15237912	38.4995401	14.53838932	29.08726931
15:47:36.243	0.529134577	0.527415828	5.060842691	8.917608607	20.96104178	21.00166713	28.00567049	34.57642881	51.77001842	58.95237189	67.60468993	64.54767708	64.43221818	64.56634572	58.16208815	38.5025697	14.5411621	29.08956836
15:47:37.229	0.529463194	0.52857752	5.062192296	8.920089536	20.96694603	21.00724142	28.01293798	34.58758974	51.79171097	58.97670146	67.62807313	64.5733397	64.45290989	64.58811112	58.17902938	38.51239842	14.54703239	29.09567818
15:47:38.192	0.529874919	0.528262702	5.06467452	8.925267544	20.97974568	21.02033075	28.03755678	34.61760938	51.85175646	59.0493205	67.71318567	64.65649724	64.53527767	64.66481455	58.25388133	38.56432431	14.56708427	29.13327018
15:47:39.178	0.529435717	0.528446015	5.065797632	8.92689823	20.97969716	21.02061534	28.03669295	34.61499845	51.84472403	59.03180383	67.69366858	64.63724778	64.51454706	64.64387839	58.22663858	38.54139874	14.5565771	29.11547824
15:47:40.147	0.530066815	0.529212952	5.067726164	8.928973904	20.98627387	21.02666876	28.045328	34.62671075	51.8644952	59.06340615	67.71899261	64.65764805	64.53311071	64.66531301	58.24380709	38.5524872	14.56282472	29.12238712
15:47:41.133	0.530538358	0.529450093	5.069277062	8.931265133	20.99140644	21.03122126	28.05222797	34.63660435	51.88207116	59.08179621	67.73972292	64.67918848	64.55491671	64.68596907	58.26111469	38.56330488	14.56757669	29.12988259
15:47:42.118	0.53052129	0.530970645	5.0708028	8.93360869	20.99556501	21.03621996	28.05916226	34.64484738	51.89978435	59.10011901	67.75786496	64.69080261	64.56816469	64.70202205	58.27048231	38.56759634	14.57049218	29.13248843
15:47:43.082	0.530185139	0.529546727	5.071800278	8.935350873	21.0002525	21.04008784	28.06287964	34.64879048	51.90234176	59.10210153	67.76099459	64.69514703	64.57270106	64.6994304	58.27110703	38.56560744	14.57135002	29.13043069
15:47:44.068	0.531125347	0.530439239	5.073325996	8.937809942	21.00595417	21.04584952	28.06999506	34.65985104	51.91894959	59.12451491	67.78243671	64.71701301	64.59683659	64.71996573	58.29235042	38.58050409	14.57898259	29.14241612
15:47:45.039	0.531161467	0.530144919	5.074046594	8.939137798	21.00640494	21.04579193	28.06856878	34.65625754	51.91532455	59.11721839	67.77314287	64.70031195	64.58157368	64.70500458	58.27418998	38.56551264	14.57288674	29.12923363
15:47:46.023	0.531244115	0.530889607	5.075119365	8.94068345	21.01100063	21.04957492	28.07564999	34.66254985	51.9206268	59.13020674	67.78733782	64.71599424	64.59482169	64.71949758	58.28589153	38.57390768	14.57695983	29.13586308
15:47:46.990	0.531954982	0.530703808	5.076267785	8.94212036	21.010856	21.05066851	28.07423865	34.65985698	51.91613261	59.11599544	67.7693732	64.69983533	64.57545663	64.70674423	58.26491614	38.55545502	14.5690109	29.12193437
15:47:47.961	0.53202434	0.531489522	5.077617477	8.943956147	21.01612401	21.0569739	28.08220229	34.6691013	51.93243524	59.13601009	67.79307971	64.71551685	64.59822377	64.72424635	58.2826572	38.56654379	14.57350883	29.12993585
15:47:48.947	0.532266531	0.530877325	5.079042514	8.946112158	21.01829335	21.05968334	28.08578597	34.67379283	51.93728014	59.14378734	67.79472165	64.71910328	64.59941984	64.72796241	58.28230027	38.5644327	14.57281537	29.12725238
15:47:49.929	0.53222952	0.531688654	5.080517912	8.948917867	21.02501016	21.06518642	28.0942289	34.68538702	51.95289689	59.15685412	67.81998142	64.74297613	64.62183351	64.75260634	58.30448165	38.57789542	14.57994444	29.13673299
15:47:50.898	0.532195839	0.532396607	5.082999987	8.952227352	21.03364322	21.07344468	28.10949091	34.70431801	51.9786602	59.19131446	67.85928224	64.77889004	64.66475515	64.79483778	58.34142064	38.59887247	14.58727757	29.15387423
15:47:51.868	0.532507838	0.531594747	5.084903272	8.956001151	21.04237301	21.08239478	28.1236066	34.72253193	52.01010302	59.22493436	67.8994243	64.8229947	64.70868978	64.84649535	58.38037349	38.6229892	14.5966123	29.17245444
15:47:52.855	0.533012612	0.532751258	5.086076637	8.958218151	21.04775762	21.08721862	28.1304327	34.73255836	52.02466788	59.2389988	67.92034891	64.83759254	64.72426774	64.86093396	58.3902451	38.62703376	14.5995114	29.1752469
15:47:53.835	0.533427644	0.532858515	5.087753341	8.960217252	21.05130598	21.09254063	28.13645589	34.73848391	52.03138807	59.24642851	67.92451431	64.84182964	64.72531156	64.85987081	58.38739359	38.62104117	14.59741882	29.16985869
15:47:54.805	0.533497001	0.532623154	5.089002349	8.962831261	21.05623064	21.09662147	28.14509529	34.74709445	52.04785085	59.26290189	67.94246201	64.85854195	64.73815361	64.87300076	58.39607365	38.62421939	14.59841095	29.17091876
15:47:55.776	0.5335863	0.531903325	5.091182402	8.965353685	21.06158357	21.10368971	28.15196636	34.757122	52.05681218	59.27938652	67.96028033	64.87666465	64.75555336	64.89348047	58.41145831	38.63372627	14.60320816	29.17813423
15:47:56.762	0.533615763	0.53293166	5.091927973	8.966685595	21.06488227	21.10590758	28.15335056	34.75957919	52.06811421	59.2810561	67.96800478	64.87824428	64.75806628	64.90103088	58.41117025	38.63327157	14.60275823	29.1777424
15:47:57.742	0.534286729	0.533091037	5.092975562	8.968237771	21.06652072	21.10823561	28.15622415	34.76287045	52.06546519	59.28131341	67.97081136	64.8812881	64.76306006	64.9048346	58.4162589	38.63795847	14.6040023	29.18181377
15:47:58.712	0.534359408	0.533461471	5.094224552	8.970027716	21.07093778	21.11179909	28.16187069	34.77053055	52.07740729	59.2988515	67.99180032	64.90375024	64.78086495	64.92501771	58.43921761	38.65493114	14.61041523	29.19549109
15:47:59.684	0.534029903	0.53316288	5.094945082	8.971545126	21.07039973	21.11246557	28.16026787	34.76633665	52.07382043	59.29567921	67.97855941	64.89589078	64.77745185	64.91571444	58.43650263	38.65674991	14.61029933	29.19705751
15:49:15.131	0.548614153	0.549349692	5.17814568	9.089029108	21.26824633	21.31212199	28.36387855	34.9984269	52.38113256	59.61228552	68.31106893	65.217876	65.11578202	65.24448412	58.74203626	38.88541988	14.78437415	29.38200503
15:49:16.116	0.550042553	0.548992761	5.178566126	9.091387944	21.27055869	21.31129818	28.36840591	34.9966413	52.38926557	59.61036467	68.31611347	65.22170338	65.11523998	65.24665875	58.73951683	38.88396127	14.78593191	29.38160547
15:49:17.100	0.550201367	0.549479912	5.179993003	9.094158755	21.27474546	21.31531703	28.37290393	35.00117347	52.39605673	59.62103039	68.320252	65.22580192	65.11945861	65.24991004	58.74303909	38.88490089	14.78735344	29.38357761
15:49:18.067	0.550878661	0.548703516	5.18089163	9.095345118	21.27536589	21.31691193	28.37181016	35.00088936	52.38997008	59.61421005	68.31668886	65.22393172	65.11552111	65.24600663	58.73978525	38.88366344	14.78728453	29.38207164
15:49:19.037	0.550854691	0.549693878	5.181060576	9.095934196	21.27578676	21.31551969	28.36991797	34.99550424	52.3863995	59.60272739	68.30115437	65.20622129	65.09856768	65.2296987	58.72147289	38.87181924	14.78416753	29.37202486
15:49:20.024	0.550873914	0.54995121	5.182034532	9.09653613	21.27649743	21.3174436	28.36828436	34.99463533	52.38246385	59.60364234	68.29668651	65.20136911	65.09645578	65.23008257	58.71973175	38.87261071	14.78435914	29.3735707
15:49:20.989	0.551046034	0.550714319	5.182832526	9.09834373	21.27900698	21.31974976	28.37272956	34.99851869	52.39033664	59.6087136	68.30561246	65.21192158	65.10381229	65.2360127	58.73284102	38.88361195	14.7886736	29.3825909
15:49:21.974	0.550992141	0.549937913	5.184032935	9.098313569	21.27749721	21.31971472	28.36963179	34.99363263	52.38022542	59.59666056	68.28587263	65.1977385	65.08919029	65.21742093	58.71642978	38.87379626	14.78667139	29.37494288
15:49:22.944	0.551410195	0.550040622	5.18442832	9.099846453	21.27900339	21.32019098	28.36936061	34.9948819	52.38146558	59.59901989	68.28625702	65.19576001	65.08874771	65.2200993	58.71548769	38.87290516	14.78771286	29.37486269
15:49:23.929	0.551632152	0.5501194	5.185729366	9.100890885	21.28124529	21.32230245	28.37052347	34.99507997	52.37813973	59.5957316	68.28327737	65.19085337	65.08612907	65.22054886	58.71219004	38.87077893	14.78716973	29.37351709
15:49:24.915	0.551884018	0.549484815	5.18627559	9.102122755	21.28221118	21.32309493	28.37065294	34.99342768	52.37752046	59.58746695	68.27544442	65.18730303	65.07783802	65.2106922	58.70294212	38.86509234	14.78522532	29.36888039
15:49:25.880	0.551830139	0.550399989	5.188230946	9.104667073	21.28696172	21.32848503	28.3775761	35.00351191	52.39506821	59.60761326	68.30481921	65.21488964	65.10666913	65.23698235	58.73468076	38.88768979	14.79383867	29.38722772
15:49:26.867	0.552274765	0.550806825	5.18895328	9.105909821	21.28954086	21.33136578	28.37922855	35.00689361	52.39789508	59.61442376	68.31186997	65.22050744	65.11625683	65.24644201	58.74525236	38.89676427	14.80008337	29.39570228
15:49:27.838	0.551951681	0.55155369	5.189700891	9.106507582	21.28907288	21.3291524	28.3762981	35.00070838	52.38652511	59.60566463	68.29245271	65.19948771	65.09418783	65.222091	58.72373574	38.88150787	14.79472097	29.38384333
15:49:28.822	0.55271536	0.55176574	5.19127869	9.108814051	21.29377873	21.33458058	28.38470398	35.01114126	52.40588844	59.62005166	68.31755782	65.22756431	65.12271748	65.25272353	58.75517926	38.90470032	14.80541102	29.40236446
15:49:29.793	0.5526648	0.552855185	5.191950815	9.109618877	21.2950531	21.33693819	28.38562273	35.0129905	52.40630528	59.61714324	68.3178776	65.22894936	65.12369322	65.25587457	58.75471794	38.90509506	14.80590152	29.40312376
15:49:30.763	0.552571035	0.552093319	5.193050668	9.111110315	21.29928716	21.34117075	28.39010671	35.01618997	52.41223429	59.63279566	68.33301629	65.24140114	65.13591271	65.2646512	58.76981921	38.91639365	14.81013985	29.41283708
15:49:31.733	0.553108726	0.551947418	5.193697636	9.112741248	21.30001304	21.34235815	28.39095695	35.01700579	52.41384807	59.62673762	68.32919446	65.23746972	65.13091187	65.26396745	58.76567311	38.913846	14.8087688	29.41102474
15:49:32.715	0.553124626	0.552636176	5.194998675	9.114287014	21.30337255	21.34525196	28.39467134	35.02028775	52.42099759	59.63481431	68.33404477	65.24097145	65.13923292	65.26903161	58.76946994	38.917357	14.81053295	29.41396957
15:49:33.686	0.553210327	0.553242072	5.196425591	9.116377837	21.30813159	21.35086156	28.40359205	35.03068806	52.43415434	59.65236111	68.35785498	65.26731119	65.15889792	65.28551082	58.78946913	38.92974368	14.81471355	29.42284351
15:49:34.671	0.553797856	0.552676691	5.197475001	9.118573097	21.31213041	21.35250743	28.40744335	35.03672013	52.4442927	59.66399116	68.37008266	65.28041536	65.17187905	65.30056323	58.80111643	38.94000506	14.81688229	29.42906627
15:49:35.640	0.554146108	0.552727283	5.198600005	9.11936703	21.31341362	21.35637792	28.40739254	35.03611912	52.44149209	59.65848226	68.36030729	65.27257792	65.16176264	65.29322084	58.78966944	38.92907535	14.81297891	29.42120457
15:49:36.620	0.554610671	0.552378903	5.199121087	9.120030039	21.31309782	21.35405431	28.4054312	35.03230028	52.43410996	59.6478857	68.34270242	65.24976855	65.14587355	65.27422159	58.77019047	38.91574804	14.80800055	29.4113045
[truncated: 5,035 more rows]
