# Supplementary material for: Measurements of spectral irradiance during the solar eclipse of 21 August 2017: reassessment of the effect of solar limb darkening and of changes in total ozone
Source: Copernicus journal article supplement (doi:10.5194/acp-2018-1048), 2018-11-02
Supplement: Supplementary file 1 [file acp-2018-1048-supplement.zip › Fig11a_Measurement.xls]

## Sheet: Fig11a_Measurement
Time (UT)	306 (1)	306 (2)	315	320	340 (1)	340 (2)	380	395	412	443	490	532	555 (1)	555 (2)	665	875	940	1020
1899-12-31 14:35:14	0.0461052	0.0484257	1.02639	2.30888	7.2068	7.21837	9.96122	12.3863	18.7476	21.6378	25.1862	23.8724	23.8948	23.9199	23.2011	16.9568	3.96869	13.0505
1899-12-31 14:35:15	0.044008	0.0460262	1.02688	2.30901	7.20941	7.2232	9.96741	12.392	18.7533	21.6463	25.2045	23.8777	23.9135	23.9307	23.2131	16.9715	3.97225	13.0595
1899-12-31 14:35:16	0.0441253	0.0459611	1.02747	2.31047	7.21247	7.22609	9.97162	12.3975	18.7618	21.6564	25.2198	23.8937	23.93	23.9464	23.2312	16.9865	3.97728	13.073
1899-12-31 14:35:17	0.044032	0.0462901	1.02818	2.31098	7.21437	7.22751	9.97444	12.4007	18.7657	21.6615	25.2247	23.8998	23.9339	23.9504	23.2339	16.9872	3.97843	13.0758
1899-12-31 14:35:18	0.0438805	0.0462625	1.02862	2.31176	7.2162	7.22978	9.97743	12.4048	18.7721	21.6695	25.2367	23.9115	23.9474	23.964	23.2489	17.0041	3.9829	13.0897
1899-12-31 14:35:19	0.0438021	0.0465899	1.02908	2.31281	7.21797	7.23146	9.98034	12.4071	18.7755	21.673	25.2395	23.9142	23.9508	23.9661	23.2491	17.0025	3.98356	13.091
1899-12-31 14:35:20	0.0436392	0.0466833	1.02943	2.31384	7.21993	7.23462	9.98381	12.411	18.7823	21.6809	25.2524	23.926	23.9636	23.9811	23.2668	17.0211	3.98849	13.1086
1899-12-31 14:35:21	0.0439248	0.0472883	1.03049	2.31458	7.22165	7.23615	9.98702	12.4148	18.7874	21.6865	25.2583	23.933	23.9703	23.9876	23.2744	17.0284	3.99102	13.1158
1899-12-31 14:35:22	0.0442067	0.0474081	1.03058	2.31545	7.2245	7.23709	9.98948	12.4178	18.793	21.6939	25.2679	23.9436	23.9809	23.9991	23.2885	17.0429	3.99518	13.1285
1899-12-31 14:35:23	0.0441514	0.0463049	1.03113	2.3163	7.22608	7.23943	9.99285	12.4227	18.8001	21.7029	25.2815	23.9606	23.9963	24.0165	23.3104	17.0628	4.00111	13.149
1899-12-31 14:35:24	0.043862	0.0472997	1.03152	2.31713	7.22758	7.24115	9.99496	12.4257	18.8035	21.7067	25.2849	23.9632	24.0031	24.0187	23.3131	17.0643	4.00202	13.1506
1899-12-31 14:35:25	0.044174	0.0467636	1.03223	2.31816	7.23047	7.24365	9.99819	12.4287	18.8084	21.7119	25.2909	23.9685	24.0055	24.0254	23.3188	17.0708	4.00438	13.1577
1899-12-31 14:35:26	0.0441834	0.0468957	1.03267	2.31918	7.2319	7.24536	10.001	12.4323	18.8142	21.7193	25.3021	23.9823	24.0223	24.0379	23.3345	17.0861	4.00911	13.1734
1899-12-31 14:35:27	0.0441414	0.0473745	1.03308	2.31999	7.23424	7.24754	10.0042	12.4355	18.8193	21.7256	25.3082	23.9878	24.0307	24.046	23.3448	17.0962	4.01229	13.1836
1899-12-31 14:35:28	0.04441	0.0466784	1.03344	2.32043	7.23663	7.25043	10.0074	12.4397	18.825	21.7329	25.3203	23.9991	24.0403	24.0581	23.3596	17.1075	4.01645	13.1972
1899-12-31 14:35:29	0.0442919	0.0480551	1.03384	2.32169	7.23811	7.25237	10.0096	12.4426	18.8298	21.7387	25.3247	24.007	24.0541	24.0672	23.3703	17.1187	4.01983	13.2072
1899-12-31 14:35:30	0.0445323	0.0476048	1.03434	2.32235	7.24066	7.25309	10.0127	12.4456	18.8347	21.7446	25.3338	24.0171	24.0625	24.0754	23.3816	17.1277	4.02318	13.2175
1899-12-31 14:35:31	0.0445074	0.0467868	1.03507	2.32317	7.242	7.25585	10.0152	12.4492	18.8403	21.7511	25.3444	24.0246	24.0729	24.0843	23.3934	17.1384	4.02694	13.2286
1899-12-31 14:35:32	0.0445072	0.0474835	1.03542	2.32421	7.24411	7.25759	10.0181	12.4528	18.8445	21.7563	25.349	24.0327	24.0811	24.091	23.4007	17.1469	4.02988	13.2372
1899-12-31 14:35:33	0.0446108	0.0470828	1.03574	2.32493	7.2459	7.25989	10.0202	12.4557	18.8492	21.7614	25.3553	24.0384	24.0879	24.0982	23.4086	17.1561	4.03269	13.2463
1899-12-31 14:35:34	0.0444169	0.0467441	1.03663	2.32593	7.24765	7.26082	10.0234	12.4591	18.8533	21.7661	25.3601	24.0434	24.0907	24.1046	23.4129	17.1601	4.03473	13.251
1899-12-31 14:35:35	0.0447982	0.0475722	1.03668	2.32665	7.24956	7.26277	10.0254	12.4615	18.8573	21.77	25.3673	24.0465	24.0956	24.1082	23.4168	17.1619	4.03629	13.2561
1899-12-31 14:35:36	0.044351	0.0466792	1.03728	2.32766	7.25164	7.26525	10.0284	12.4647	18.8619	21.775	25.372	24.0533	24.1015	24.1144	23.4226	17.169	4.03886	13.2631
1899-12-31 14:35:37	0.0443637	0.0481226	1.03808	2.32834	7.25389	7.2674	10.0309	12.4686	18.8675	21.7817	25.3828	24.061	24.1121	24.1263	23.4367	17.1852	4.04327	13.2781
1899-12-31 14:35:38	0.0447244	0.0475358	1.0385	2.32911	7.25571	7.26869	10.0339	12.4715	18.8718	21.7876	25.3902	24.0702	24.1222	24.1339	23.4459	17.1954	4.04647	13.2891
1899-12-31 14:35:39	0.0445496	0.0471591	1.03875	2.32998	7.25755	7.2711	10.036	12.4745	18.877	21.7936	25.3952	24.0754	24.1262	24.1432	23.4593	17.2085	4.05044	13.3033
1899-12-31 14:35:39	0.0446084	0.0473984	1.03947	2.33074	7.25947	7.27177	10.0389	12.4771	18.8795	21.7964	25.3964	24.0775	24.1289	24.1446	23.4586	17.2088	4.05146	13.3047
1899-12-31 14:35:40	0.0447801	0.0475986	1.03962	2.33169	7.26147	7.27452	10.0411	12.4807	18.8849	21.8021	25.4027	24.0864	24.137	24.1532	23.4692	17.2187	4.05475	13.3147
1899-12-31 14:35:41	0.0447298	0.047567	1.03995	2.33256	7.26315	7.27636	10.0444	12.4833	18.8892	21.8066	25.4077	24.0897	24.1444	24.1575	23.4751	17.2259	4.05738	13.3233
1899-12-31 14:35:42	0.044366	0.0482475	1.04055	2.33373	7.2648	7.27757	10.0461	12.4856	18.8924	21.8098	25.4082	24.0902	24.1429	24.1595	23.4727	17.2253	4.05841	13.3236
1899-12-31 14:35:43	0.0448789	0.0480107	1.04084	2.33456	7.26634	7.27936	10.0476	12.489	18.8968	21.8147	25.4153	24.0997	24.152	24.1677	23.4835	17.237	4.06219	13.3368
1899-12-31 14:35:44	0.0445905	0.0475564	1.04174	2.33523	7.26887	7.28192	10.051	12.4917	18.901	21.8201	25.4218	24.1045	24.1579	24.1742	23.4924	17.2474	4.06559	13.348
1899-12-31 14:35:45	0.0447679	0.0480901	1.04204	2.33605	7.2711	7.28415	10.0539	12.4944	18.9054	21.825	25.4258	24.1129	24.1633	24.1812	23.5016	17.2571	4.06873	13.3588
1899-12-31 14:35:46	0.0449693	0.0479673	1.04261	2.33716	7.27276	7.28569	10.0564	12.4975	18.9094	21.8296	25.4307	24.1175	24.1694	24.1867	23.5072	17.2648	4.07148	13.367
1899-12-31 14:35:47	0.0449026	0.0482833	1.04305	2.33785	7.2742	7.28735	10.0594	12.4996	18.9127	21.8324	25.4346	24.1187	24.174	24.1919	23.5147	17.2726	4.07446	13.377
1899-12-31 14:35:48	0.0449067	0.0480734	1.04322	2.33865	7.27635	7.28813	10.0609	12.5027	18.9163	21.836	25.439	24.1243	24.1778	24.1948	23.5174	17.2786	4.07684	13.3845
1899-12-31 14:35:49	0.0447385	0.0474656	1.04385	2.33949	7.27765	7.29104	10.0631	12.505	18.9204	21.8401	25.4436	24.1276	24.1822	24.2002	23.5252	17.2892	4.08023	13.3945
1899-12-31 14:35:50	0.0448868	0.0484658	1.04421	2.3403	7.27987	7.2931	10.065	12.5072	18.9238	21.8441	25.4459	24.1319	24.1863	24.2041	23.5295	17.2972	4.08294	13.4035
1899-12-31 14:35:51	0.0450565	0.0479629	1.04482	2.34125	7.28147	7.29459	10.0689	12.5107	18.9277	21.8482	25.4524	24.1367	24.1954	24.2102	23.5374	17.3081	4.08646	13.4157
1899-12-31 14:35:52	0.0448032	0.0473496	1.04536	2.34194	7.28362	7.29664	10.0698	12.5128	18.9303	21.8503	25.4513	24.1383	24.1943	24.2103	23.5376	17.3093	4.08803	13.4192
1899-12-31 14:35:53	0.0449829	0.0483335	1.0459	2.34248	7.28486	7.29802	10.072	12.5156	18.9348	21.8549	25.4571	24.1453	24.2021	24.217	23.5471	17.3221	4.09188	13.4323
1899-12-31 14:35:54	0.0449897	0.0480721	1.04633	2.34346	7.28703	7.29947	10.0744	12.5175	18.937	21.8564	25.4589	24.1434	24.1999	24.216	23.5458	17.3215	4.09336	13.4349
1899-12-31 14:35:55	0.044893	0.0485617	1.04694	2.34455	7.28839	7.30183	10.077	12.5198	18.9402	21.8591	25.4609	24.1456	24.2035	24.2192	23.5493	17.329	4.09631	13.4435
1899-12-31 14:35:56	0.0452613	0.0482092	1.04758	2.34544	7.29063	7.30432	10.0799	12.5226	18.944	21.8639	25.4661	24.1524	24.209	24.2258	23.5575	17.3393	4.10005	13.4554
1899-12-31 14:35:57	0.0451178	0.0478813	1.04779	2.34609	7.29187	7.30522	10.0817	12.5243	18.9475	21.8658	25.468	24.1544	24.2095	24.227	23.5588	17.3431	4.10202	13.4607
1899-12-31 14:35:58	0.045158	0.048381	1.04819	2.34678	7.29379	7.30756	10.0832	12.5268	18.9499	21.8674	25.4677	24.1526	24.2102	24.2256	23.5587	17.3443	4.10374	13.465
1899-12-31 14:35:59	0.0451607	0.0482135	1.0489	2.34782	7.29589	7.30757	10.0856	12.529	18.952	21.8697	25.4674	24.1536	24.2093	24.2254	23.5579	17.3475	4.10547	13.47
1899-12-31 14:36:00	0.0452573	0.0483893	1.04918	2.34917	7.29763	7.31028	10.0876	12.5317	18.9557	21.8729	25.4721	24.1559	24.2141	24.2299	23.5643	17.3553	4.10882	13.4798
1899-12-31 14:37:15	0.0470444	0.0526763	1.08727	2.41554	7.44545	7.45759	10.2863	12.7637	19.2926	22.2471	25.9046	24.5751	24.6528	24.6591	23.9515	17.642	4.25107	13.7454
1899-12-31 14:37:16	0.0480468	0.0514826	1.08723	2.41613	7.44692	7.4589	10.2885	12.7666	19.2973	22.2513	25.9067	24.5799	24.6514	24.6656	23.9586	17.6524	4.25406	13.7512
1899-12-31 14:37:17	0.0479295	0.0513957	1.08804	2.41734	7.44972	7.46152	10.2928	12.7715	19.3042	22.2599	25.9174	24.592	24.6639	24.6779	23.976	17.6687	4.25882	13.7635
1899-12-31 14:37:18	0.0478786	0.051545	1.08856	2.41831	7.45142	7.46359	10.2942	12.7742	19.3079	22.2637	25.9236	24.5964	24.6702	24.6809	23.9777	17.6686	4.26032	13.7656
1899-12-31 14:37:19	0.0479942	0.0514097	1.08907	2.41921	7.45375	7.46543	10.297	12.7764	19.3122	22.2676	25.9266	24.6003	24.6737	24.6838	23.9793	17.6712	4.2612	13.7652
1899-12-31 14:37:20	0.0479807	0.0512927	1.08975	2.42009	7.45527	7.46724	10.2993	12.7802	19.3167	22.2737	25.9304	24.6077	24.6821	24.6938	23.9887	17.6789	4.26453	13.7738
1899-12-31 14:37:21	0.0485588	0.0522748	1.09004	2.42113	7.45777	7.46935	10.303	12.7824	19.3201	22.2772	25.9375	24.6105	24.6876	24.697	23.9895	17.6792	4.2655	13.7744
1899-12-31 14:37:22	0.0485767	0.0516626	1.09042	2.42191	7.45921	7.47133	10.3048	12.7851	19.3239	22.2799	25.9363	24.6097	24.6871	24.6968	23.9867	17.6743	4.26513	13.769
1899-12-31 14:37:23	0.0482506	0.052085	1.0912	2.42266	7.46086	7.47263	10.3066	12.788	19.3271	22.2829	25.9409	24.6163	24.6892	24.6975	23.984	17.6713	4.26515	13.7651
1899-12-31 14:37:24	0.0482201	0.0521881	1.09166	2.42379	7.46297	7.47504	10.3089	12.7901	19.3312	22.2866	25.945	24.6132	24.6908	24.6994	23.9846	17.6661	4.26523	13.7616
1899-12-31 14:37:25	0.0480483	0.0509323	1.09211	2.42435	7.4651	7.47613	10.3121	12.7931	19.3357	22.2926	25.947	24.6188	24.6948	24.7042	23.9868	17.6679	4.26652	13.7632
1899-12-31 14:37:26	0.0482281	0.0519878	1.09295	2.42537	7.46721	7.47827	10.3149	12.7962	19.3395	22.2959	25.9528	24.6205	24.7018	24.7077	23.9877	17.6665	4.26707	13.7607
1899-12-31 14:37:27	0.0482693	0.0527115	1.09296	2.42633	7.46907	7.48121	10.3176	12.7999	19.3457	22.3026	25.9557	24.6306	24.7097	24.717	23.9943	17.6725	4.2694	13.7671
1899-12-31 14:37:28	0.0485759	0.0520188	1.09346	2.42722	7.4713	7.48337	10.3212	12.8043	19.3518	22.3116	25.9677	24.6416	24.7226	24.7312	24.0111	17.6835	4.27348	13.777
1899-12-31 14:37:29	0.0484055	0.0517617	1.09399	2.42795	7.47306	7.4855	10.3237	12.8085	19.3577	22.3189	25.9792	24.651	24.7317	24.7416	24.0221	17.6896	4.27603	13.783
1899-12-31 14:37:30	0.0486307	0.0525942	1.09469	2.42886	7.47512	7.48796	10.3262	12.8105	19.3624	22.3239	25.9827	24.6565	24.7377	24.7464	24.0245	17.6893	4.27642	13.782
1899-12-31 14:37:31	0.0487948	0.0522828	1.09482	2.42985	7.47713	7.49018	10.3298	12.8155	19.3703	22.3324	25.9987	24.6732	24.753	24.7626	24.0422	17.7057	4.28102	13.7955
1899-12-31 14:37:32	0.0486814	0.053398	1.09559	2.43055	7.47919	7.49248	10.3323	12.8175	19.3733	22.3351	25.9995	24.6776	24.7498	24.7618	24.0366	17.6957	4.27968	13.7872
1899-12-31 14:37:33	0.048497	0.0521261	1.09621	2.43153	7.48106	7.49385	10.3347	12.821	19.3777	22.3408	26.006	24.6793	24.7547	24.7672	24.0411	17.6981	4.28101	13.787
1899-12-31 14:37:34	0.0485245	0.0516151	1.0967	2.43249	7.48273	7.49495	10.3381	12.8249	19.3835	22.3481	26.016	24.6867	24.762	24.7767	24.0499	17.7062	4.28362	13.7939
1899-12-31 14:37:35	0.0481514	0.0520242	1.09707	2.43363	7.48494	7.49717	10.3406	12.828	19.3872	22.3521	26.0219	24.6939	24.7688	24.7813	24.0521	17.7049	4.28412	13.7928
1899-12-31 14:37:36	0.0487619	0.0522588	1.0977	2.43427	7.48706	7.49918	10.3436	12.8315	19.3936	22.3593	26.029	24.7016	24.7784	24.793	24.0642	17.7177	4.28761	13.8015
1899-12-31 14:37:37	0.0488829	0.052326	1.09828	2.43556	7.4893	7.50232	10.3482	12.8367	19.4015	22.3702	26.0454	24.7217	24.8008	24.8132	24.0877	17.7402	4.29362	13.8192
1899-12-31 14:37:38	0.0485141	0.0531287	1.09883	2.43603	7.49144	7.50357	10.3503	12.839	19.4045	22.3725	26.0459	24.7215	24.7996	24.8105	24.0816	17.7284	4.29179	13.8087
1899-12-31 14:37:39	0.048726	0.0535286	1.09963	2.4371	7.49332	7.50583	10.3517	12.8424	19.4096	22.3788	26.0542	24.7297	24.806	24.8179	24.0874	17.7313	4.29324	13.8099
1899-12-31 14:37:40	0.0490577	0.0532696	1.09962	2.43823	7.4958	7.5073	10.3556	12.8469	19.4167	22.3878	26.0699	24.7426	24.8218	24.8339	24.1058	17.7473	4.29775	13.8235
1899-12-31 14:37:41	0.0490191	0.0529259	1.1	2.439	7.49783	7.50963	10.3588	12.8504	19.4214	22.393	26.0733	24.7455	24.8234	24.8354	24.1014	17.738	4.29642	13.8144
1899-12-31 14:37:42	0.0492574	0.0529416	1.10089	2.43987	7.49995	7.51206	10.362	12.8535	19.4264	22.3994	26.0797	24.7517	24.8287	24.8418	24.1058	17.7399	4.29748	13.8146
1899-12-31 14:37:43	0.0491069	0.0529979	1.10132	2.44083	7.50198	7.51443	10.3647	12.8577	19.4331	22.4078	26.0957	24.7619	24.8374	24.8539	24.1206	17.7494	4.30011	13.8215
1899-12-31 14:37:44	0.0491846	0.0524066	1.10173	2.4418	7.50494	7.51658	10.368	12.8618	19.4396	22.4155	26.1044	24.7714	24.8463	24.8645	24.1296	17.754	4.30201	13.8257
1899-12-31 14:37:45	0.0493637	0.0524263	1.10206	2.44283	7.5057	7.51817	10.3716	12.8652	19.4438	22.4199	26.1066	24.781	24.8503	24.8669	24.1293	17.7472	4.30116	13.8185
1899-12-31 14:37:46	0.0487849	0.0535407	1.10277	2.44381	7.50866	7.52024	10.3741	12.8702	19.4515	22.4303	26.124	24.7894	24.8644	24.8821	24.1419	17.7584	4.3043	13.8266
1899-12-31 14:37:47	0.04938	0.0532808	1.10332	2.44439	7.51107	7.52381	10.3779	12.8742	19.4584	22.4384	26.1322	24.8014	24.8753	24.8942	24.1523	17.7626	4.30602	13.8287
1899-12-31 14:37:47	0.0495859	0.0528162	1.10398	2.44529	7.51317	7.52555	10.3817	12.8793	19.466	22.4484	26.1451	24.8169	24.8916	24.9102	24.1725	17.7753	4.30982	13.8392
1899-12-31 14:37:48	0.0494164	0.0531782	1.10435	2.44645	7.51569	7.52718	10.3843	12.8825	19.4708	22.454	26.1515	24.8163	24.8977	24.9121	24.1686	17.7659	4.30848	13.8297
1899-12-31 14:37:49	0.0491438	0.0529406	1.10463	2.44758	7.51754	7.52959	10.3884	12.8865	19.4783	22.463	26.1642	24.8326	24.9091	24.9246	24.1816	17.7701	4.31049	13.8328
1899-12-31 14:37:50	0.0494665	0.0521605	1.10554	2.44822	7.52048	7.53207	10.3925	12.8937	19.4894	22.4787	26.1851	24.8619	24.9367	24.9565	24.2193	17.805	4.31983	13.8622
1899-12-31 14:37:51	0.0497201	0.0534775	1.10621	2.44924	7.52259	7.53584	10.3961	12.8978	19.4951	22.4863	26.1954	24.8704	24.947	24.9652	24.2253	17.8037	4.32055	13.8609
1899-12-31 14:37:52	0.0495259	0.0532709	1.10658	2.45015	7.52539	7.5381	10.4013	12.9041	19.5058	22.5014	26.2145	24.896	24.9727	24.9922	24.2566	17.8339	4.32823	13.8838
1899-12-31 14:37:53	0.0498149	0.0527453	1.10725	2.45116	7.52705	7.53955	10.4035	12.9082	19.5119	22.508	26.22	24.9007	24.9818	24.9989	24.2608	17.8329	4.3286	13.881
1899-12-31 14:37:54	0.0494662	0.0535905	1.10771	2.45233	7.53024	7.54233	10.4079	12.9124	19.5189	22.5165	26.2319	24.9113	24.9936	25.0106	24.2685	17.8323	4.32955	13.8795
1899-12-31 14:37:55	0.0496056	0.0538166	1.10808	2.45358	7.53224	7.54447	10.4103	12.9166	19.5248	22.5246	26.2416	24.9221	25.0059	25.0201	24.2763	17.8377	4.33123	13.8814
1899-12-31 14:37:56	0.0497143	0.05326	1.10879	2.45411	7.53471	7.54699	10.4146	12.9224	19.5342	22.5376	26.262	24.9432	25.0311	25.0421	24.3021	17.858	4.33686	13.8979
1899-12-31 14:37:57	0.0498173	0.0526742	1.10939	2.45547	7.53671	7.54861	10.4188	12.9269	19.5425	22.547	26.2795	24.9574	25.0459	25.0577	24.3189	17.8708	4.34081	13.9071
1899-12-31 14:37:58	0.0497774	0.0532052	1.10989	2.45629	7.53952	7.55064	10.4225	12.9328	19.5513	22.5603	26.2988	24.9794	25.0651	25.0808	24.3461	17.8911	4.34687	13.9247
1899-12-31 14:37:59	0.0497418	0.05429	1.11029	2.45724	7.54164	7.55333	10.4265	12.9372	19.5588	22.5691	26.3107	24.9907	25.0756	25.094	24.3564	17.8959	4.34905	13.927
1899-12-31 14:39:15	0.0515693	0.0544971	1.15097	2.53115	7.71237	7.72351	10.682	13.2495	20.0358	23.1491	27.0487	25.7237	25.8341	25.8612	25.0531	18.3077	4.50483	14.2203
1899-12-31 14:39:16	0.0527759	0.056659	1.15201	2.53171	7.71497	7.72744	10.6837	13.2554	20.0445	23.1584	27.0544	25.7428	25.8512	25.8734	25.0704	18.3181	4.50675	14.2249
1899-12-31 14:39:17	0.0527868	0.0563873	1.153	2.53322	7.71856	7.73104	10.6892	13.2623	20.0558	23.172	27.0733	25.76	25.8673	25.8914	25.0843	18.3233	4.509	14.2275
1899-12-31 14:39:18	0.0527095	0.057071	1.15325	2.53383	7.72085	7.73398	10.693	13.2677	20.0646	23.184	27.0871	25.7758	25.8877	25.9088	25.1039	18.333	4.51245	14.237
1899-12-31 14:39:19	0.0530481	0.0568252	1.15406	2.53503	7.72364	7.73512	10.697	13.2727	20.0725	23.1932	27.1007	25.7871	25.9012	25.9203	25.1128	18.3349	4.51337	14.2375
1899-12-31 14:39:20	0.0529568	0.0575569	1.15442	2.53603	7.72552	7.73785	10.7002	13.277	20.0792	23.2022	27.1118	25.7975	25.9148	25.9323	25.1229	18.3391	4.51492	14.2398
1899-12-31 14:39:21	0.0526615	0.0564857	1.15515	2.53724	7.72827	7.73985	10.7041	13.2821	20.0881	23.2135	27.1263	25.8132	25.9332	25.9488	25.1378	18.3447	4.51718	14.243
1899-12-31 14:39:22	0.0534409	0.0575518	1.15572	2.53772	7.73019	7.74226	10.708	13.2867	20.0945	23.2209	27.1341	25.8238	25.9388	25.9565	25.1429	18.3421	4.51732	14.2399
1899-12-31 14:39:23	0.0527896	0.0578165	1.15627	2.539	7.73284	7.74497	10.7131	13.293	20.1043	23.2349	27.1545	25.8427	25.9595	25.9813	25.1665	18.3633	4.52264	14.2546
1899-12-31 14:39:24	0.0533212	0.0563563	1.15669	2.54014	7.73523	7.74737	10.718	13.2992	20.1141	23.2474	27.1714	25.8622	25.981	26.0022	25.1893	18.3798	4.52729	14.2676
1899-12-31 14:39:25	0.0529571	0.0563098	1.1575	2.54095	7.73796	7.74996	10.7217	13.3046	20.1236	23.2599	27.1944	25.8813	25.9995	26.0218	25.2091	18.3945	4.53114	14.2771
1899-12-31 14:39:26	0.053134	0.0565018	1.15797	2.54206	7.74036	7.75244	10.7248	13.3094	20.1306	23.2694	27.2023	25.8946	26.0147	26.0332	25.2186	18.3978	4.53251	14.2778
1899-12-31 14:39:27	0.05284	0.0577079	1.15836	2.54281	7.74321	7.7545	10.7301	13.3153	20.1408	23.282	27.223	25.9123	26.0406	26.0534	25.2386	18.4102	4.53642	14.287
1899-12-31 14:39:28	0.0529855	0.0576099	1.15902	2.54379	7.74567	7.75721	10.734	13.3206	20.1496	23.2937	27.2359	25.9257	26.0572	26.0706	25.2558	18.4207	4.53949	14.2932
1899-12-31 14:39:29	0.0530569	0.0572707	1.15938	2.54498	7.7481	7.76017	10.739	13.3268	20.1595	23.3066	27.257	25.9437	26.0732	26.09	25.2741	18.4328	4.54321	14.3021
1899-12-31 14:39:30	0.0531577	0.0566672	1.15996	2.54633	7.75037	7.76203	10.7426	13.3321	20.1671	23.3171	27.2691	25.9558	26.0849	26.1039	25.2864	18.4369	4.54547	14.3048
1899-12-31 14:39:31	0.0532334	0.0572257	1.16063	2.5473	7.75316	7.76509	10.7471	13.3374	20.1758	23.3287	27.2837	25.9727	26.0964	26.118	25.2982	18.4435	4.54735	14.3062
1899-12-31 14:39:32	0.0533625	0.0570332	1.16119	2.54846	7.75536	7.76736	10.7511	13.343	20.1851	23.3402	27.3008	25.9863	26.1147	26.1356	25.3151	18.4456	4.54955	14.3097
1899-12-31 14:39:33	0.0535385	0.0574422	1.16177	2.54947	7.7584	7.7703	10.7554	13.3497	20.1958	23.3548	27.3222	26.0097	26.1413	26.16	25.343	18.4624	4.55448	14.3231
1899-12-31 14:39:34	0.0533734	0.0571905	1.16243	2.55034	7.76112	7.77404	10.7608	13.3554	20.205	23.3677	27.3394	26.0256	26.1591	26.1773	25.3593	18.4714	4.55697	14.3275
1899-12-31 14:39:35	0.0534755	0.0576155	1.16312	2.55164	7.76418	7.77564	10.7647	13.3617	20.2148	23.3808	27.3574	26.0456	26.1732	26.1957	25.3732	18.479	4.55911	14.3316
1899-12-31 14:39:36	0.0534463	0.0579775	1.16375	2.55256	7.76675	7.77843	10.7703	13.3689	20.2261	23.3955	27.3757	26.0734	26.1978	26.2226	25.4009	18.5003	4.56461	14.3473
1899-12-31 14:39:36	0.0535889	0.0577435	1.16399	2.55346	7.76983	7.78151	10.7747	13.375	20.2366	23.4088	27.3977	26.0949	26.2188	26.2428	25.4179	18.51	4.56769	14.3541
1899-12-31 14:39:37	0.0534391	0.0582363	1.16483	2.55457	7.7719	7.78416	10.7797	13.3819	20.2487	23.4257	27.4166	26.1219	26.2464	26.2695	25.4482	18.5334	4.5735	14.369
1899-12-31 14:39:38	0.0536765	0.0584609	1.1652	2.55554	7.77539	7.78635	10.7848	13.3883	20.259	23.4396	27.4403	26.1408	26.2681	26.2905	25.4696	18.5468	4.57724	14.3777
1899-12-31 14:39:39	0.0535255	0.0573696	1.16554	2.55684	7.77753	7.78995	10.7886	13.3938	20.2672	23.4493	27.4536	26.1535	26.2806	26.3016	25.4747	18.5461	4.57769	14.3751
1899-12-31 14:39:40	0.0539348	0.0575639	1.16662	2.55784	7.78042	7.79198	10.7932	13.3999	20.277	23.4629	27.47	26.1708	26.2975	26.3221	25.4946	18.5568	4.58096	14.3816
1899-12-31 14:39:41	0.0536271	0.057695	1.16685	2.55883	7.78249	7.79463	10.7981	13.4056	20.2864	23.4754	27.4857	26.189	26.3158	26.3404	25.5119	18.564	4.58405	14.3876
1899-12-31 14:39:42	0.0538007	0.0578825	1.16777	2.55998	7.78545	7.79668	10.8031	13.4127	20.2972	23.4905	27.5077	26.212	26.3377	26.364	25.5374	18.5783	4.58918	14.4016
1899-12-31 14:39:43	0.0539028	0.0584092	1.16814	2.56082	7.78792	7.79986	10.8078	13.4182	20.3069	23.5025	27.5261	26.229	26.3566	26.3824	25.5548	18.5884	4.59199	14.4064
1899-12-31 14:39:44	0.0535738	0.0577218	1.1689	2.56192	7.79102	7.80267	10.8117	13.424	20.3166	23.5155	27.5412	26.2454	26.3781	26.4013	25.5768	18.6005	4.59565	14.4149
1899-12-31 14:39:45	0.0539634	0.0574343	1.16921	2.56289	7.79348	7.80548	10.8165	13.4298	20.3264	23.5285	27.559	26.2639	26.3989	26.4209	25.5951	18.6119	4.59901	14.4221
1899-12-31 14:39:46	0.0536096	0.0581934	1.16988	2.56379	7.79576	7.80764	10.82	13.4355	20.3342	23.5387	27.5688	26.2724	26.41	26.4318	25.5994	18.6085	4.59887	14.4178
1899-12-31 14:39:47	0.0538146	0.0585236	1.17037	2.56495	7.79855	7.81037	10.8254	13.4417	20.3454	23.5524	27.5876	26.2974	26.4332	26.4537	25.6209	18.6226	4.60275	14.4272
1899-12-31 14:39:48	0.0539939	0.0591121	1.17086	2.56626	7.80075	7.81316	10.8294	13.4474	20.3546	23.5656	27.6035	26.3138	26.4522	26.4727	25.6395	18.6324	4.60541	14.4315
1899-12-31 14:39:49	0.0535099	0.058787	1.17122	2.56703	7.80367	7.81542	10.8337	13.4533	20.3644	23.5776	27.6218	26.3287	26.471	26.4901	25.6529	18.6402	4.60764	14.4345
1899-12-31 14:39:50	0.0540344	0.0584456	1.17206	2.56796	7.80667	7.8187	10.8393	13.4606	20.3757	23.5941	27.6482	26.3524	26.4968	26.5173	25.6834	18.6619	4.61308	14.4498
1899-12-31 14:39:51	0.053836	0.0584591	1.17255	2.56921	7.80922	7.82118	10.8439	13.4676	20.3866	23.609	27.6677	26.3747	26.5209	26.5389	25.7041	18.675	4.61712	14.4605
1899-12-31 14:39:52	0.0542379	0.0582618	1.1731	2.5701	7.81228	7.82411	10.8482	13.4734	20.3959	23.6206	27.6849	26.3926	26.5392	26.5578	25.7188	18.6812	4.61936	14.4647
1899-12-31 14:39:53	0.0545561	0.0586045	1.17384	2.57112	7.81463	7.82736	10.8538	13.4806	20.4076	23.6366	27.7095	26.4162	26.565	26.5836	25.7477	18.6991	4.62452	14.4797
1899-12-31 14:39:54	0.0543273	0.0582656	1.17431	2.57212	7.81713	7.82885	10.8577	13.4851	20.4156	23.6474	27.7238	26.4274	26.5773	26.5978	25.7576	18.7006	4.62546	14.4789
1899-12-31 14:39:55	0.0540677	0.0583151	1.17505	2.57343	7.81954	7.83087	10.8625	13.4913	20.4256	23.6605	27.7438	26.4478	26.5952	26.6188	25.7795	18.7155	4.62917	14.4876
1899-12-31 14:39:56	0.0545004	0.0585255	1.1755	2.57432	7.82229	7.83401	10.867	13.4966	20.4346	23.6712	27.758	26.4633	26.6101	26.6337	25.7914	18.719	4.63046	14.4894
1899-12-31 14:39:57	0.0542465	0.0588195	1.17609	2.57536	7.82434	7.83681	10.8708	13.5018	20.4421	23.6811	27.7699	26.4773	26.6218	26.6452	25.8018	18.7219	4.63144	14.4893
1899-12-31 14:39:58	0.0547911	0.0581401	1.17659	2.57651	7.82741	7.83937	10.8748	13.5082	20.4525	23.6952	27.7886	26.5	26.6437	26.6675	25.8246	18.7368	4.63568	14.499
1899-12-31 14:39:59	0.0547072	0.0582881	1.17717	2.57754	7.83008	7.84231	10.8796	13.5143	20.4627	23.7085	27.8039	26.5193	26.6663	26.6886	25.8436	18.7503	4.63942	14.5083
1899-12-31 14:40:00	0.0545057	0.058923	1.17785	2.57835	7.8323	7.84376	10.8834	13.5192	20.4705	23.7182	27.8144	26.5319	26.6739	26.6978	25.8491	18.747	4.63922	14.5029
1899-12-31 14:41:15	0.0568993	0.0645045	1.22105	2.655	8.02287	8.03444	11.203	13.9327	21.1311	24.569	28.9388	27.6929	27.878	27.9176	26.9801	19.3826	4.84625	14.9281
1899-12-31 14:41:16	0.0576892	0.0618333	1.2212	2.65648	8.02434	8.03666	11.203	13.9366	21.1378	24.5802	28.9688	27.6991	27.891	27.926	26.989	19.3875	4.84841	14.9334
1899-12-31 14:41:17	0.0575439	0.0629317	1.22218	2.65819	8.0277	8.03932	11.2083	13.9427	21.1475	24.5926	28.9854	27.7131	27.9072	27.9417	27.0043	19.3983	4.85198	14.9416
1899-12-31 14:41:18	0.0574765	0.0625898	1.22269	2.65866	8.03009	8.04099	11.2097	13.9461	21.1523	24.5965	28.9904	27.7177	27.9113	27.9454	27.0053	19.3962	4.85237	14.9391
1899-12-31 14:41:19	0.0575257	0.061961	1.2231	2.65952	8.03235	8.04395	11.2142	13.9491	21.157	24.602	28.9916	27.7174	27.9162	27.9488	27.0046	19.3894	4.85254	14.9341
1899-12-31 14:41:20	0.0578176	0.0623064	1.22351	2.66067	8.03442	8.04575	11.2169	13.9538	21.1638	24.6114	29.0047	27.7312	27.9308	27.9609	27.0166	19.3999	4.85583	14.9415
1899-12-31 14:41:21	0.0575248	0.0622028	1.22404	2.66191	8.03683	8.04893	11.2218	13.9607	21.1741	24.6247	29.0239	27.7538	27.9564	27.9833	27.0427	19.419	4.86181	14.9585
1899-12-31 14:41:22	0.0579383	0.0631086	1.2251	2.66277	8.03916	8.05098	11.2253	13.9648	21.1813	24.6324	29.0313	27.7658	27.9697	27.994	27.0515	19.424	4.86413	14.9623
1899-12-31 14:41:23	0.0581043	0.063813	1.22551	2.66378	8.04128	8.05273	11.2291	13.9691	21.1878	24.6405	29.0405	27.7739	27.9755	28.0023	27.0578	19.4245	4.86504	14.9614
1899-12-31 14:41:24	0.057921	0.0620683	1.22601	2.66443	8.04359	8.05563	11.2321	13.9737	21.1953	24.6503	29.0541	27.7871	27.9905	28.0159	27.0693	19.4286	4.86785	14.9668
1899-12-31 14:41:25	0.0576576	0.0632895	1.22652	2.66576	8.04602	8.05766	11.2356	13.9782	21.2024	24.6597	29.0639	27.7982	28	28.0261	27.0794	19.4333	4.8699	14.9695
1899-12-31 14:41:26	0.0578146	0.0628523	1.22747	2.66693	8.04884	8.05985	11.2397	13.9834	21.2108	24.6706	29.0813	27.8112	28.0131	28.0432	27.0981	19.4471	4.87387	14.9786
1899-12-31 14:41:27	0.057854	0.0625748	1.22766	2.66781	8.05082	8.06204	11.2436	13.9877	21.2177	24.6777	29.0918	27.8217	28.0233	28.0524	27.1028	19.4472	4.87475	14.9787
1899-12-31 14:41:28	0.0578297	0.0624624	1.22806	2.66871	8.05294	8.06452	11.2466	13.9915	21.2229	24.6839	29.098	27.8267	28.0273	28.057	27.1038	19.4429	4.87477	14.9753
1899-12-31 14:41:29	0.0581427	0.0621099	1.22883	2.6696	8.05547	8.06755	11.2514	13.9961	21.2305	24.6935	29.1111	27.8403	28.0417	28.0713	27.116	19.4551	4.87803	14.9834
1899-12-31 14:41:30	0.058287	0.0624774	1.22929	2.67045	8.05762	8.07041	11.2541	14.001	21.2386	24.7038	29.125	27.8548	28.0613	28.0856	27.132	19.4662	4.88172	14.9914
1899-12-31 14:41:31	0.0582931	0.0628713	1.22967	2.67139	8.05984	8.07128	11.2575	14.0053	21.2453	24.7113	29.1309	27.865	28.0683	28.0945	27.1406	19.4702	4.88351	14.9926
1899-12-31 14:41:32	0.0585697	0.0627318	1.2302	2.67241	8.06188	8.07347	11.259	14.0071	21.2478	24.7137	29.131	27.8617	28.065	28.0892	27.1291	19.4536	4.88068	14.981
1899-12-31 14:41:33	0.0581556	0.0622625	1.23091	2.67345	8.06429	8.0759	11.2622	14.0098	21.2516	24.717	29.134	27.8642	28.0647	28.0906	27.1247	19.4492	4.88015	14.9762
1899-12-31 14:41:34	0.0583113	0.0625944	1.23151	2.67444	8.06607	8.0775	11.2664	14.0152	21.2598	24.7286	29.1502	27.8817	28.084	28.1072	27.1439	19.4632	4.88429	14.9857
1899-12-31 14:41:35	0.058677	0.0630047	1.23195	2.67552	8.06882	8.08039	11.2692	14.0186	21.2654	24.7348	29.1573	27.8903	28.0926	28.1161	27.1501	19.4664	4.8859	14.988
1899-12-31 14:41:36	0.0589005	0.0626486	1.23253	2.67625	8.07032	8.08242	11.2717	14.0218	21.2702	24.7394	29.1618	27.8918	28.0966	28.1198	27.1522	19.465	4.88647	14.9871
1899-12-31 14:41:37	0.0588174	0.0639634	1.2331	2.67723	8.07352	8.08438	11.2756	14.0281	21.2803	24.7533	29.1818	27.9175	28.121	28.1424	27.1805	19.4899	4.89309	15.0061
1899-12-31 14:41:38	0.0587346	0.0628358	1.2336	2.67829	8.07573	8.08733	11.2807	14.0329	21.2883	24.7629	29.1943	27.9362	28.1328	28.1584	27.1974	19.5042	4.89715	15.0173
1899-12-31 14:41:39	0.0583199	0.0619497	1.23422	2.67923	8.07729	8.08963	11.2837	14.037	21.2938	24.768	29.1963	27.9368	28.1343	28.161	27.1967	19.4997	4.89698	15.013
1899-12-31 14:41:40	0.0585905	0.0627752	1.23486	2.68013	8.07998	8.09171	11.2857	14.0408	21.2992	24.7745	29.2036	27.9418	28.1425	28.1702	27.2035	19.5047	4.89894	15.0166
1899-12-31 14:41:41	0.0584409	0.0632465	1.23544	2.68099	8.08261	8.09412	11.2906	14.0455	21.3072	24.7856	29.2238	27.9558	28.1566	28.1867	27.2199	19.5213	4.90325	15.0292
1899-12-31 14:41:42	0.0586346	0.0624223	1.23582	2.68212	8.08476	8.09651	11.2928	14.0488	21.3116	24.7895	29.2267	27.9593	28.1585	28.1886	27.2185	19.5156	4.90262	15.0236
1899-12-31 14:41:43	0.0587158	0.0632523	1.23634	2.68336	8.08637	8.0976	11.2967	14.0535	21.319	24.7988	29.2371	27.969	28.1709	28.2009	27.2298	19.5258	4.90566	15.0311
1899-12-31 14:41:44	0.0587857	0.0629788	1.2371	2.68412	8.08888	8.10057	11.3002	14.0588	21.3272	24.8092	29.2507	27.9872	28.188	28.2165	27.2437	19.5377	4.90941	15.0405
1899-12-31 14:41:45	0.0588141	0.0634417	1.23743	2.68518	8.09103	8.10269	11.3021	14.0603	21.3289	24.8101	29.2483	27.9788	28.1787	28.208	27.2287	19.5162	4.90486	15.0219
1899-12-31 14:41:46	0.0585918	0.0627127	1.23812	2.68593	8.0938	8.10475	11.3065	14.0649	21.3359	24.8183	29.2569	27.99	28.1917	28.2195	27.2394	19.5227	4.90733	15.0272
1899-12-31 14:41:47	0.0585982	0.0630299	1.23831	2.68712	8.09663	8.10743	11.3121	14.073	21.3493	24.837	29.2849	28.0237	28.2269	28.2547	27.2816	19.5569	4.91723	15.0557
1899-12-31 14:41:48	0.0585481	0.0639086	1.23908	2.68778	8.09749	8.10939	11.3139	14.0762	21.353	24.8405	29.2847	28.0221	28.2221	28.2542	27.2761	19.5498	4.91611	15.0487
1899-12-31 14:41:49	0.0585134	0.0640658	1.23954	2.68907	8.10066	8.11091	11.3175	14.08	21.3604	24.8492	29.2949	28.0339	28.2375	28.266	27.2871	19.5552	4.91859	15.0527
1899-12-31 14:41:50	0.0587299	0.0645418	1.23987	2.68986	8.10226	8.11259	11.3209	14.0841	21.3654	24.8551	29.3006	28.0384	28.2429	28.2718	27.2906	19.5538	4.91945	15.0522
1899-12-31 14:41:51	0.0585787	0.0634519	1.24039	2.69072	8.10504	8.11604	11.3243	14.0886	21.373	24.8646	29.3169	28.0478	28.2536	28.2838	27.3025	19.562	4.92182	15.0563
1899-12-31 14:41:52	0.0588132	0.0638953	1.24108	2.69153	8.10742	8.11995	11.3288	14.0933	21.38	24.8737	29.3306	28.0579	28.2641	28.2965	27.3145	19.5687	4.92479	15.0638
1899-12-31 14:41:52	0.0587611	0.0641096	1.24184	2.69265	8.1096	8.12104	11.3321	14.0985	21.3896	24.8862	29.3501	28.0763	28.281	28.317	27.3357	19.5863	4.92996	15.079
1899-12-31 14:41:53	0.0588096	0.0643465	1.2424	2.69402	8.112	8.12371	11.3367	14.1029	21.3964	24.895	29.3613	28.09	28.2967	28.3294	27.3476	19.5953	4.9325	15.085
1899-12-31 14:41:54	0.0589165	0.064402	1.243	2.69453	8.11449	8.12481	11.3383	14.1053	21.3992	24.8953	29.3599	28.085	28.2927	28.3228	27.3338	19.5765	4.92925	15.0691
1899-12-31 14:41:55	0.0590258	0.0631259	1.2435	2.69542	8.11666	8.12756	11.3431	14.111	21.4081	24.908	29.3742	28.1029	28.3085	28.342	27.3554	19.597	4.93508	15.0855
1899-12-31 14:41:56	0.058925	0.0637461	1.24391	2.69654	8.11875	8.12983	11.3454	14.1147	21.4145	24.9149	29.3829	28.1128	28.3182	28.3508	27.3623	19.5998	4.93674	15.0875
1899-12-31 14:41:57	0.0596585	0.0643601	1.24427	2.69783	8.12037	8.13138	11.3481	14.1179	21.4187	24.9196	29.3856	28.1125	28.3205	28.3521	27.3592	19.595	4.9363	15.0821
1899-12-31 14:41:58	0.0594207	0.0635389	1.24514	2.69891	8.12336	8.13382	11.3533	14.1228	21.4268	24.9288	29.3999	28.1281	28.3339	28.3662	27.3733	19.6061	4.93979	15.0907
1899-12-31 14:41:59	0.0596305	0.0641272	1.24563	2.69974	8.12503	8.13579	11.3546	14.1262	21.4314	24.9342	29.4018	28.1313	28.3371	28.3711	27.3767	19.6053	4.94043	15.0894
1899-12-31 14:43:15	0.0609206	0.0663862	1.28863	2.77731	8.31952	8.3285	11.6833	14.5511	22.1087	25.7954	30.5157	29.249	29.5084	29.5329	28.4284	20.1911	5.15098	15.4803
1899-12-31 14:43:16	0.0625621	0.067161	1.29017	2.77881	8.32211	8.33351	11.6864	14.5587	22.1201	25.8103	30.5379	29.2737	29.5255	29.5602	28.4525	20.2052	5.15605	15.4937
1899-12-31 14:43:17	0.0626341	0.0683892	1.29073	2.78009	8.32575	8.33706	11.6926	14.567	22.1332	25.8272	30.5608	29.293	29.5455	29.5801	28.4683	20.2101	5.15876	15.4966
1899-12-31 14:43:18	0.0628962	0.0664109	1.29144	2.78116	8.32893	8.33968	11.6972	14.5731	22.1438	25.8413	30.5838	29.3164	29.5657	29.6013	28.4907	20.2233	5.16326	15.5068
1899-12-31 14:43:19	0.0628156	0.066843	1.29177	2.78215	8.33138	8.34191	11.7022	14.5788	22.1517	25.8513	30.5953	29.3306	29.5799	29.6129	28.4992	20.2251	5.16446	15.5066
1899-12-31 14:43:20	0.0627914	0.0683395	1.2925	2.78313	8.33372	8.34457	11.7074	14.5867	22.1639	25.8685	30.6194	29.3525	29.6043	29.6401	28.5255	20.244	5.16993	15.5202
1899-12-31 14:43:21	0.0624196	0.0669603	1.29318	2.7841	8.33676	8.34726	11.7127	14.5931	22.1749	25.8831	30.6385	29.3762	29.6249	29.66	28.5436	20.2546	5.17323	15.527
1899-12-31 14:43:22	0.0632274	0.0677075	1.29394	2.78535	8.33896	8.35045	11.7171	14.5981	22.182	25.8913	30.645	29.3826	29.6313	29.6669	28.5437	20.2482	5.17247	15.5191
1899-12-31 14:43:23	0.0625646	0.0672772	1.29441	2.78673	8.3423	8.3537	11.7225	14.6051	22.1956	25.9091	30.6689	29.4079	29.6596	29.6959	28.5769	20.271	5.1791	15.5375
1899-12-31 14:43:24	0.0628851	0.0673282	1.29472	2.78752	8.34467	8.35551	11.7264	14.6112	22.2038	25.9189	30.6836	29.4213	29.6734	29.7076	28.586	20.2719	5.18041	15.5371
1899-12-31 14:43:25	0.063057	0.0679809	1.29553	2.78853	8.3475	8.35837	11.7313	14.6179	22.2149	25.9344	30.7032	29.4465	29.6967	29.7281	28.6077	20.2846	5.1848	15.5473
1899-12-31 14:43:26	0.062785	0.0673461	1.29592	2.78976	8.34979	8.3613	11.7351	14.6244	22.2257	25.948	30.7205	29.4617	29.7149	29.7464	28.6227	20.2924	5.18729	15.5507
1899-12-31 14:43:27	0.0627525	0.0682148	1.29647	2.79091	8.35328	8.36406	11.7417	14.6319	22.238	25.9655	30.74	29.4864	29.7406	29.7728	28.6482	20.3116	5.19292	15.5646
1899-12-31 14:43:28	0.0629905	0.0680319	1.29721	2.79169	8.35538	8.36634	11.7464	14.6383	22.2481	25.978	30.7552	29.5032	29.7584	29.7901	28.6613	20.3179	5.19567	15.5696
1899-12-31 14:43:29	0.0629162	0.0673106	1.29748	2.7929	8.35879	8.36912	11.7527	14.6454	22.2604	25.994	30.7791	29.5252	29.785	29.814	28.6837	20.3324	5.19991	15.5779
1899-12-31 14:43:30	0.0637	0.067088	1.29852	2.794	8.36152	8.37186	11.7561	14.652	22.2705	26.0079	30.7933	29.5433	29.8054	29.8327	28.7	20.3408	5.20301	15.5832
1899-12-31 14:43:31	0.0632139	0.0682548	1.299	2.79478	8.36384	8.37553	11.7611	14.6583	22.2808	26.0212	30.8141	29.5575	29.823	29.8505	28.718	20.3487	5.20577	15.587
1899-12-31 14:43:32	0.0635748	0.068641	1.29952	2.79569	8.36624	8.37852	11.7662	14.6646	22.2911	26.0351	30.8302	29.5769	29.8414	29.8699	28.7353	20.3579	5.20922	15.5929
1899-12-31 14:43:33	0.0634428	0.0676512	1.30039	2.79694	8.36945	8.38053	11.7709	14.6703	22.2997	26.0459	30.8468	29.5879	29.8536	29.882	28.7432	20.3581	5.21027	15.5919
1899-12-31 14:43:34	0.063118	0.0679424	1.30058	2.79806	8.37245	8.38319	11.7762	14.6774	22.3113	26.0618	30.8675	29.6082	29.877	29.9052	28.7678	20.3729	5.21501	15.6044
1899-12-31 14:43:35	0.0632685	0.067103	1.30114	2.79906	8.37492	8.3864	11.7817	14.6847	22.3234	26.0777	30.8914	29.6321	29.8989	29.9304	28.7891	20.3855	5.21986	15.6161
1899-12-31 14:43:36	0.0633031	0.0680484	1.30185	2.80011	8.3775	8.38783	11.7853	14.6894	22.3316	26.0867	30.903	29.6447	29.9117	29.9417	28.7967	20.3887	5.22087	15.6154
1899-12-31 14:43:37	0.063653	0.0688009	1.30259	2.80119	8.38021	8.39092	11.7905	14.696	22.3419	26.1003	30.9208	29.6617	29.931	29.9604	28.8158	20.3996	5.22422	15.6233
1899-12-31 14:43:38	0.0636649	0.0684771	1.30284	2.80245	8.38266	8.39363	11.794	14.7019	22.3523	26.1138	30.9366	29.6831	29.9472	29.9796	28.8347	20.4104	5.22802	15.6309
1899-12-31 14:43:39	0.0631147	0.0683186	1.30363	2.80358	8.38484	8.39653	11.7989	14.708	22.3618	26.1258	30.9573	29.6963	29.9627	29.9946	28.8474	20.4151	5.22986	15.633
1899-12-31 14:43:40	0.0634516	0.068526	1.30435	2.80413	8.38798	8.3989	11.8034	14.7138	22.3709	26.1376	30.9761	29.7109	29.979	30.0107	28.8619	20.4218	5.23225	15.6369
1899-12-31 14:43:41	0.0633383	0.0680832	1.30482	2.80518	8.39036	8.40074	11.8077	14.7192	22.3793	26.1485	30.9858	29.7216	29.9912	30.0248	28.8742	20.4279	5.2344	15.6403
1899-12-31 14:43:42	0.0632005	0.0684049	1.30515	2.80615	8.39282	8.40376	11.8115	14.7251	22.3881	26.1601	30.9998	29.7356	30.0071	30.0402	28.8882	20.435	5.23666	15.6442
1899-12-31 14:43:43	0.0636823	0.0698354	1.30561	2.80707	8.39544	8.40573	11.8165	14.7311	22.3981	26.1726	31.0142	29.7518	30.0225	30.0569	28.9014	20.4408	5.23879	15.6466
1899-12-31 14:43:44	0.063588	0.0687418	1.30618	2.80839	8.39746	8.40906	11.8213	14.7381	22.4094	26.1876	31.0342	29.7745	30.0458	30.0797	28.9245	20.4569	5.24339	15.6576
1899-12-31 14:43:44	0.0637342	0.0687912	1.30702	2.8092	8.40138	8.41253	11.8261	14.7446	22.4209	26.2032	31.0547	29.7979	30.0694	30.1041	28.9471	20.4724	5.24813	15.6703
1899-12-31 14:43:45	0.0632789	0.0678284	1.30739	2.81023	8.40344	8.41348	11.8306	14.7501	22.4309	26.2161	31.0683	29.8159	30.086	30.1204	28.9629	20.4806	5.25075	15.6759
1899-12-31 14:43:46	0.063595	0.068578	1.30805	2.81117	8.40614	8.41759	11.8354	14.7579	22.4439	26.2331	31.0983	29.84	30.1119	30.1486	28.99	20.5012	5.25698	15.6928
1899-12-31 14:43:47	0.0639279	0.0688133	1.30869	2.81233	8.4088	8.42001	11.8407	14.7633	22.4521	26.2423	31.1093	29.8514	30.1221	30.16	28.9967	20.5009	5.25787	15.6918
1899-12-31 14:43:48	0.0635684	0.0685786	1.30925	2.81323	8.41219	8.42261	11.8445	14.7693	22.4605	26.2541	31.1239	29.8671	30.1378	30.1753	29.0111	20.5055	5.26006	15.6959
1899-12-31 14:43:49	0.0640115	0.0682355	1.30977	2.8141	8.41371	8.42521	11.8499	14.7758	22.4717	26.2692	31.1464	29.8879	30.1606	30.1976	29.0354	20.5206	5.26493	15.708
1899-12-31 14:43:50	0.063821	0.0692074	1.31042	2.81516	8.41635	8.42681	11.8543	14.7816	22.481	26.2819	31.1629	29.9048	30.1786	30.2147	29.0497	20.5296	5.26804	15.7132
1899-12-31 14:43:51	0.0645212	0.0684257	1.31101	2.81642	8.41891	8.42961	11.8584	14.7873	22.491	26.2939	31.1776	29.9232	30.1942	30.2327	29.0657	20.5398	5.27137	15.7194
1899-12-31 14:43:52	0.0636344	0.0686666	1.31138	2.81761	8.42225	8.43305	11.8642	14.7935	22.5009	26.3066	31.1931	29.9413	30.2119	30.249	29.0784	20.5455	5.2739	15.7231
1899-12-31 14:43:53	0.0640981	0.0690531	1.31219	2.81835	8.4245	8.43493	11.8677	14.7996	22.5096	26.3178	31.2085	29.9582	30.2248	30.2628	29.0881	20.551	5.27589	15.7254
1899-12-31 14:43:54	0.0644731	0.069017	1.31277	2.81945	8.42659	8.43758	11.8716	14.8039	22.5169	26.3272	31.2191	29.9678	30.2341	30.2724	29.0951	20.5514	5.27683	15.7244
1899-12-31 14:43:55	0.0638264	0.0691196	1.31295	2.82031	8.42941	8.44054	11.8762	14.8102	22.526	26.3387	31.2353	29.9841	30.2543	30.2904	29.1151	20.5629	5.28036	15.7319
1899-12-31 14:43:56	0.0648522	0.0684827	1.31376	2.82123	8.43186	8.44245	11.8798	14.8147	22.5339	26.3482	31.2481	29.9935	30.2625	30.3015	29.1218	20.5644	5.2812	15.7312
1899-12-31 14:43:57	0.0645879	0.0693347	1.31422	2.82227	8.43388	8.44488	11.8846	14.8214	22.5448	26.3619	31.2661	30.0156	30.2836	30.323	29.1439	20.5777	5.28581	15.7426
1899-12-31 14:43:58	0.0644425	0.0703275	1.3149	2.82347	8.43658	8.4476	11.8889	14.8268	22.5534	26.3729	31.2788	30.0275	30.2983	30.3381	29.1556	20.583	5.28777	15.745
1899-12-31 14:43:59	0.064393	0.0696579	1.31572	2.82395	8.43926	8.44934	11.893	14.8322	22.5635	26.3856	31.2948	30.0431	30.3179	30.3564	29.173	20.5956	5.29115	15.7532
1899-12-31 14:45:15	0.0691733	0.0720227	1.35759	2.89888	8.61961	8.62707	12.1869	15.2014	23.1353	27.083	32.1515	30.9066	31.2232	31.2545	29.9594	21.0298	5.46093	16.0595
1899-12-31 14:45:16	0.0675076	0.0719729	1.35838	2.89984	8.62041	8.63165	12.1867	15.2057	23.1406	27.0919	32.1798	30.9151	31.2314	31.2642	29.97	21.0449	5.46475	16.0694
1899-12-31 14:45:17	0.0674755	0.0728603	1.35911	2.90084	8.62294	8.63316	12.1898	15.2081	23.1426	27.0918	32.171	30.9067	31.2235	31.2554	29.9555	21.0306	5.46219	16.0584
1899-12-31 14:45:18	0.0672521	0.0727252	1.35973	2.90177	8.62427	8.63463	12.1914	15.2098	23.1444	27.0935	32.1732	30.9093	31.2222	31.2557	29.9545	21.0291	5.46254	16.0574
1899-12-31 14:45:19	0.0678939	0.0729531	1.36032	2.90282	8.62623	8.63752	12.194	15.2128	23.1484	27.0969	32.1772	30.9111	31.2252	31.2595	29.9585	21.0341	5.46444	16.0613
1899-12-31 14:45:20	0.0675028	0.0740084	1.36077	2.90344	8.62707	8.63831	12.1939	15.2123	23.1472	27.0934	32.1664	30.8983	31.2137	31.2472	29.9428	21.0184	5.46096	16.0485
1899-12-31 14:45:21	0.0677299	0.0732532	1.36135	2.90443	8.62953	8.63923	12.1969	15.2157	23.1521	27.0992	32.177	30.9082	31.2223	31.2562	29.9534	21.0287	5.46479	16.0584
1899-12-31 14:45:22	0.068495	0.0736904	1.36209	2.90542	8.63146	8.64297	12.1995	15.2192	23.157	27.1046	32.1858	30.917	31.2304	31.2642	29.9624	21.0389	5.46828	16.066
1899-12-31 14:45:23	0.0677883	0.0731649	1.36239	2.90646	8.63316	8.6447	12.2019	15.2219	23.1617	27.1077	32.1902	30.9216	31.2397	31.2697	29.9682	21.0459	5.47103	16.0711
1899-12-31 14:45:24	0.0678017	0.0740616	1.36295	2.90716	8.63534	8.64616	12.2034	15.2234	23.1625	27.1087	32.1883	30.9183	31.2344	31.2665	29.9638	21.0417	5.47103	16.0686
1899-12-31 14:45:25	0.0678938	0.0728193	1.36318	2.90804	8.63624	8.64676	12.2047	15.2258	23.1651	27.1109	32.1921	30.9218	31.2339	31.267	29.9626	21.0409	5.47184	16.0673
1899-12-31 14:45:26	0.0680855	0.0729827	1.36378	2.90874	8.63856	8.64894	12.2072	15.2269	23.1674	27.112	32.1891	30.9168	31.2317	31.2647	29.9581	21.0371	5.4722	16.0659
1899-12-31 14:45:27	0.0684218	0.0734987	1.36419	2.90973	8.64074	8.65061	12.2097	15.231	23.1728	27.1176	32.1987	30.9283	31.2431	31.2744	29.9697	21.0477	5.47602	16.0739
1899-12-31 14:45:28	0.0686121	0.0734528	1.36465	2.91037	8.6419	8.65289	12.2124	15.2329	23.1761	27.1208	32.2001	30.9294	31.2427	31.2759	29.9703	21.0477	5.47705	16.0743
1899-12-31 14:45:29	0.0684531	0.0732157	1.36553	2.91141	8.64404	8.65468	12.2145	15.2354	23.1802	27.1249	32.2075	30.9341	31.2494	31.2818	29.9775	21.0535	5.47965	16.08
1899-12-31 14:45:29	0.0683045	0.0732702	1.36573	2.91254	8.64608	8.65673	12.2178	15.2377	23.1829	27.1275	32.2093	30.9348	31.2505	31.2828	29.9758	21.0521	5.48043	16.0788
1899-12-31 14:45:30	0.0684327	0.0742672	1.36676	2.91317	8.64859	8.65883	12.2198	15.242	23.1887	27.1349	32.2202	30.9472	31.2587	31.2937	29.9892	21.0648	5.48466	16.0893
1899-12-31 14:45:31	0.0685132	0.0737541	1.3671	2.91391	8.6502	8.66071	12.2232	15.2451	23.1931	27.139	32.222	30.9497	31.2634	31.2987	29.9929	21.0651	5.48625	16.0913
1899-12-31 14:45:32	0.0683826	0.0730102	1.36761	2.91477	8.65146	8.66215	12.2252	15.2475	23.196	27.1417	32.2251	30.9511	31.2628	31.2988	29.9913	21.0644	5.48713	16.0903
1899-12-31 14:45:33	0.068409	0.0739671	1.36812	2.91592	8.6536	8.66487	12.2273	15.2505	23.201	27.1471	32.2292	30.956	31.2693	31.3053	29.9955	21.0671	5.48916	16.0928
1899-12-31 14:45:34	0.0683822	0.0743726	1.3685	2.91668	8.65595	8.66658	12.2299	15.2539	23.2052	27.1508	32.2358	30.9608	31.2724	31.3097	29.9988	21.0681	5.4906	16.0942
1899-12-31 14:45:35	0.0683064	0.0739891	1.36927	2.91755	8.65784	8.66792	12.2341	15.2591	23.2135	27.1624	32.2514	30.9792	31.2902	31.3279	30.0214	21.0871	5.49693	16.1111
1899-12-31 14:45:36	0.0684453	0.0732479	1.36963	2.9186	8.65971	8.67128	12.2371	15.2617	23.2176	27.166	32.2542	30.9814	31.2935	31.3312	30.0226	21.0867	5.49781	16.1106
1899-12-31 14:45:37	0.0688711	0.0742635	1.37054	2.91966	8.66125	8.67218	12.2392	15.2644	23.2211	27.1693	32.2555	30.9826	31.2966	31.3328	30.022	21.086	5.49843	16.1092
1899-12-31 14:45:38	0.0685648	0.0733704	1.37062	2.92009	8.66338	8.67338	12.2398	15.2657	23.2209	27.1679	32.2506	30.9757	31.2869	31.3223	30.0095	21.075	5.49622	16.0989
1899-12-31 14:45:39	0.0683361	0.0736376	1.37129	2.92114	8.66518	8.67588	12.2437	15.2699	23.2289	27.1783	32.2663	30.9918	31.3054	31.3396	30.0276	21.0906	5.50185	16.1144
1899-12-31 14:45:40	0.0685768	0.0735323	1.37169	2.92215	8.66667	8.67769	12.2472	15.2732	23.2339	27.1835	32.2707	31.0005	31.3145	31.3474	30.0351	21.0974	5.50504	16.1227
1899-12-31 14:45:41	0.0687007	0.0748565	1.3724	2.92295	8.66889	8.6796	12.2486	15.2756	23.2366	27.1857	32.2732	30.9993	31.3147	31.3483	30.0355	21.0987	5.50584	16.1225
1899-12-31 14:45:42	0.0689371	0.0743578	1.37262	2.92375	8.67053	8.681	12.2501	15.2767	23.2376	27.1858	32.2706	30.9972	31.3083	31.3435	30.0286	21.0929	5.50533	16.1187
1899-12-31 14:45:43	0.068697	0.073779	1.37348	2.92469	8.67251	8.68298	12.2535	15.2796	23.2419	27.1901	32.2758	31.0006	31.3129	31.3486	30.0331	21.097	5.50752	16.1236
1899-12-31 14:45:44	0.0691979	0.0746621	1.3739	2.92529	8.67342	8.68561	12.2541	15.2806	23.2421	27.1887	32.2696	30.9943	31.3069	31.3423	30.0249	21.0907	5.50662	16.1173
1899-12-31 14:45:45	0.0690914	0.0748531	1.37457	2.9264	8.67567	8.68676	12.2551	15.2824	23.2431	27.1887	32.2683	30.9897	31.3035	31.3374	30.0192	21.0855	5.506	16.1133
1899-12-31 14:45:46	0.0691144	0.0743435	1.37506	2.92707	8.67716	8.68737	12.2566	15.2827	23.243	27.1857	32.2628	30.9811	31.2949	31.3293	30.0096	21.0787	5.50492	16.1063
1899-12-31 14:45:47	0.0689785	0.0744832	1.37515	2.92778	8.67791	8.68944	12.2576	15.284	23.244	27.1852	32.2593	30.9797	31.2929	31.3256	30.0064	21.0769	5.50563	16.1059
1899-12-31 14:45:48	0.0689751	0.0748637	1.37563	2.92861	8.67921	8.6904	12.2591	15.2839	23.2435	27.1825	32.2558	30.9724	31.2835	31.319	29.9946	21.0699	5.50475	16.1005
1899-12-31 14:45:49	0.0688135	0.0746693	1.37615	2.92965	8.68171	8.69293	12.262	15.2878	23.2483	27.1882	32.2636	30.9809	31.2944	31.3293	30.0118	21.0855	5.50997	16.1162
1899-12-31 14:45:50	0.0692663	0.0736747	1.37683	2.9305	8.68299	8.69315	12.2628	15.2882	23.2479	27.1861	32.2598	30.975	31.2871	31.3234	30.0026	21.0804	5.51006	16.1136
1899-12-31 14:45:51	0.0689774	0.0748572	1.37739	2.93096	8.68378	8.69464	12.2627	15.2864	23.2451	27.1799	32.2462	30.9602	31.2727	31.3067	29.9821	21.066	5.50706	16.1009
1899-12-31 14:45:52	0.0689634	0.0743694	1.37772	2.93168	8.68594	8.69586	12.2645	15.2884	23.2479	27.1826	32.2502	30.9641	31.2767	31.3102	29.9876	21.0741	5.51053	16.109
1899-12-31 14:45:53	0.0690291	0.0750972	1.37814	2.93242	8.68706	8.69737	12.2644	15.2885	23.2463	27.1791	32.2417	30.9556	31.268	31.3018	29.9785	21.0691	5.51041	16.1059
1899-12-31 14:45:54	0.0687092	0.0749634	1.37832	2.9333	8.68757	8.69745	12.2647	15.2871	23.244	27.1729	32.2288	30.9408	31.2532	31.2874	29.9594	21.0559	5.50757	16.0944
1899-12-31 14:45:55	0.0691981	0.074771	1.37926	2.93413	8.68893	8.7	12.2659	15.2882	23.2445	27.173	32.2289	30.9382	31.2512	31.2863	29.9605	21.0578	5.50912	16.0982
1899-12-31 14:45:56	0.0690762	0.0744165	1.37969	2.93484	8.69035	8.70113	12.2668	15.2884	23.2442	27.1713	32.2241	30.935	31.2475	31.2808	29.9544	21.0556	5.50993	16.098
1899-12-31 14:45:57	0.0692328	0.0750048	1.38	2.93568	8.69193	8.70236	12.268	15.2901	23.2448	27.171	32.2271	30.9365	31.2475	31.28	29.956	21.0616	5.51202	16.1028
1899-12-31 14:45:58	0.0694789	0.0751049	1.38049	2.93632	8.69284	8.7031	12.27	15.2909	23.2458	27.1701	32.2222	30.9337	31.2434	31.2766	29.9522	21.0616	5.51306	16.1051
1899-12-31 14:45:59	0.0695373	0.0746934	1.38116	2.93724	8.69567	8.70562	12.2721	15.2939	23.2502	27.1758	32.2291	30.9403	31.2547	31.2879	29.9699	21.0781	5.51846	16.1213
1899-12-31 14:46:00	0.0694071	0.0755971	1.38155	2.93785	8.69583	8.70571	12.2717	15.2921	23.2465	27.1675	32.2122	30.9238	31.2373	31.2683	29.9432	21.0574	5.51373	16.1035
1899-12-31 14:47:15	0.0732609	0.0798756	1.42129	3.00427	8.83608	8.84548	12.4633	15.5177	23.5687	27.51	32.5802	31.2887	31.5979	31.6398	30.2484	21.2608	5.63972	16.2738
1899-12-31 14:47:16	0.0728735	0.0781673	1.42165	3.00519	8.84005	8.84942	12.4686	15.5221	23.5745	27.519	32.5983	31.2897	31.6132	31.6504	30.2575	21.2661	5.64216	16.277
1899-12-31 14:47:17	0.0726842	0.0787441	1.4223	3.00656	8.84362	8.85231	12.4741	15.5276	23.5835	27.5298	32.6134	31.306	31.6317	31.6665	30.2733	21.279	5.64717	16.2868
1899-12-31 14:47:18	0.0731774	0.0790483	1.42269	3.00735	8.84405	8.85396	12.4757	15.5304	23.5863	27.5321	32.612	31.3047	31.6275	31.6646	30.2676	21.2722	5.64618	16.2808
1899-12-31 14:47:19	0.0725556	0.078649	1.42345	3.00851	8.84698	8.85674	12.4788	15.5356	23.5948	27.5424	32.6274	31.317	31.6474	31.6816	30.2866	21.2855	5.65135	16.2928
1899-12-31 14:47:20	0.0730248	0.0787515	1.42383	3.00909	8.84836	8.85841	12.4819	15.5384	23.5981	27.5448	32.6306	31.3216	31.6498	31.6827	30.2866	21.2837	5.65171	16.2903
1899-12-31 14:47:21	0.0730362	0.078119	1.42479	3.01003	8.85049	8.85996	12.4832	15.54	23.6014	27.5476	32.6315	31.3209	31.6501	31.6832	30.2834	21.2803	5.65174	16.2868
1899-12-31 14:47:22	0.072947	0.079147	1.42492	3.01097	8.85293	8.86272	12.4885	15.5445	23.6086	27.5576	32.6452	31.3337	31.6633	31.6983	30.3004	21.2923	5.6565	16.2983
1899-12-31 14:47:23	0.0735501	0.0790485	1.42566	3.0117	8.85436	8.86497	12.4899	15.5492	23.6145	27.5643	32.6472	31.3439	31.6722	31.7068	30.3091	21.2972	5.65878	16.3025
1899-12-31 14:47:24	0.0733588	0.0787501	1.42605	3.01282	8.85708	8.86641	12.4939	15.553	23.6214	27.5721	32.658	31.3556	31.6876	31.7187	30.3229	21.3086	5.66264	16.3125
1899-12-31 14:47:25	0.073122	0.0785504	1.42658	3.01369	8.85917	8.86872	12.4974	15.5573	23.6282	27.581	32.6683	31.3685	31.6996	31.7317	30.3331	21.3188	5.6665	16.3208
1899-12-31 14:47:26	0.0730315	0.0786432	1.42703	3.01464	8.86061	8.87002	12.4999	15.561	23.6324	27.5859	32.6756	31.374	31.7094	31.7385	30.3388	21.3252	5.66882	16.3248
1899-12-31 14:47:27	0.0732423	0.0795957	1.42773	3.01538	8.86311	8.87265	12.5042	15.5668	23.6405	27.5971	32.6904	31.3864	31.7262	31.7539	30.3569	21.3398	5.67387	16.3365
1899-12-31 14:47:28	0.0733281	0.0798612	1.42813	3.01615	8.86466	8.87443	12.5058	15.5678	23.6431	27.5973	32.6893	31.386	31.7222	31.7503	30.351	21.3339	5.67345	16.3314
1899-12-31 14:47:29	0.0733451	0.0793368	1.42895	3.01737	8.86641	8.8761	12.5071	15.5691	23.6439	27.5973	32.6833	31.378	31.7165	31.7414	30.3395	21.3229	5.67201	16.3246
1899-12-31 14:47:30	0.0737255	0.0795285	1.42958	3.01811	8.86842	8.87832	12.5102	15.5737	23.6505	27.6043	32.6986	31.3917	31.7292	31.7543	30.3566	21.3381	5.67712	16.3349
1899-12-31 14:47:31	0.073276	0.0797476	1.42978	3.01908	8.87017	8.87994	12.513	15.5759	23.6543	27.6091	32.7015	31.395	31.7356	31.7603	30.3628	21.3427	5.67973	16.3405
1899-12-31 14:47:31	0.0734627	0.0795168	1.43041	3.02007	8.872	8.88132	12.5162	15.5792	23.6583	27.6137	32.7078	31.4025	31.7403	31.7677	30.3718	21.3515	5.68353	16.3477
1899-12-31 14:47:32	0.0735826	0.0788383	1.43087	3.02072	8.87369	8.88347	12.5172	15.5799	23.6588	27.6121	32.7036	31.3967	31.7368	31.7613	30.3616	21.3447	5.68264	16.3424
1899-12-31 14:47:33	0.0739039	0.0800655	1.43103	3.02156	8.87484	8.88484	12.5185	15.5817	23.6597	27.6131	32.7015	31.3978	31.7378	31.7621	30.363	21.3464	5.68429	16.3447
1899-12-31 14:47:34	0.0737175	0.0794806	1.43182	3.02215	8.87633	8.88625	12.5193	15.582	23.6608	27.6117	32.6987	31.3938	31.7316	31.7591	30.3557	21.3408	5.68409	16.3417
1899-12-31 14:47:35	0.0738344	0.0800959	1.43216	3.02303	8.87792	8.88734	12.521	15.5831	23.6612	27.611	32.6961	31.388	31.7304	31.7537	30.353	21.3421	5.68496	16.3414
1899-12-31 14:47:36	0.0737149	0.0799899	1.43255	3.02413	8.87988	8.88908	12.5239	15.5868	23.666	27.6155	32.7035	31.3978	31.7381	31.7646	30.3661	21.3537	5.68968	16.3548
1899-12-31 14:47:37	0.0738982	0.0799677	1.43336	3.0244	8.88143	8.89145	12.5247	15.5876	23.6668	27.6152	32.7044	31.396	31.7351	31.7623	30.3645	21.3543	5.69055	16.3543
1899-12-31 14:47:38	0.0740929	0.080341	1.43393	3.02544	8.88224	8.89209	12.5237	15.5855	23.663	27.6066	32.6861	31.3785	31.7144	31.7433	30.3383	21.3342	5.68677	16.3394
1899-12-31 14:47:39	0.0736998	0.0798152	1.43437	3.0261	8.88265	8.89223	12.5226	15.5826	23.6566	27.596	32.6679	31.355	31.6842	31.7169	30.3093	21.3076	5.68092	16.3193
1899-12-31 14:47:40	0.0738461	0.0797317	1.43474	3.02711	8.88361	8.89398	12.5239	15.5847	23.6578	27.597	32.6722	31.3575	31.6883	31.7196	30.3138	21.3154	5.68423	16.3264
1899-12-31 14:47:41	0.0738986	0.0794958	1.43494	3.02804	8.88555	8.89573	12.525	15.5852	23.6581	27.5956	32.6666	31.3526	31.6835	31.7156	30.3099	21.3138	5.68508	16.3264
1899-12-31 14:47:42	0.0733008	0.0794281	1.43595	3.02838	8.88684	8.89699	12.527	15.5865	23.6598	27.5974	32.6656	31.3554	31.6886	31.719	30.3142	21.3231	5.68901	16.3355
1899-12-31 14:47:43	0.073935	0.0798882	1.43601	3.02958	8.88876	8.89887	12.529	15.5874	23.6605	27.5966	32.6644	31.3531	31.6853	31.7161	30.3133	21.3255	5.69042	16.3375
1899-12-31 14:47:44	0.073924	0.0790034	1.43661	3.02998	8.88927	8.8994	12.529	15.5873	23.6595	27.5936	32.6572	31.3478	31.676	31.7084	30.3059	21.3228	5.69077	16.3365
1899-12-31 14:47:45	0.0740792	0.07955	1.43705	3.03067	8.89009	8.90067	12.5284	15.5855	23.6554	27.5846	32.6458	31.3304	31.6579	31.6913	30.2855	21.3088	5.6885	16.3266
1899-12-31 14:47:46	0.0739767	0.080154	1.43758	3.03143	8.89157	8.90111	12.5292	15.5861	23.6552	27.5845	32.645	31.3284	31.657	31.6903	30.2876	21.314	5.69113	16.3337
1899-12-31 14:47:47	0.0737844	0.0796797	1.4376	3.03208	8.89326	8.90199	12.5308	15.5868	23.6561	27.584	32.6438	31.3265	31.6556	31.6888	30.2873	21.3185	5.69376	16.3387
1899-12-31 14:47:48	0.0740769	0.0793923	1.43817	3.03293	8.89371	8.90316	12.5287	15.5844	23.6505	27.5733	32.6278	31.3061	31.6329	31.6691	30.2643	21.3033	5.69058	16.3272
1899-12-31 14:47:49	0.0740636	0.0796692	1.43843	3.03308	8.89356	8.90351	12.529	15.5825	23.6464	27.5669	32.6166	31.293	31.6227	31.6561	30.2503	21.2957	5.68975	16.3243
1899-12-31 14:47:50	0.0740566	0.0814713	1.43915	3.03379	8.89541	8.90405	12.5293	15.5825	23.6457	27.5648	32.6138	31.2902	31.6164	31.6511	30.2464	21.2948	5.6906	16.3238
1899-12-31 14:47:51	0.0739748	0.0810361	1.43963	3.03413	8.89519	8.90394	12.5275	15.5783	23.6374	27.55	32.5902	31.2629	31.5844	31.6208	30.2142	21.2675	5.68461	16.3039
1899-12-31 14:47:52	0.0739677	0.080389	1.43988	3.03497	8.89652	8.90528	12.5285	15.5795	23.6375	27.5499	32.5861	31.2628	31.584	31.6217	30.2164	21.2758	5.688	16.312
1899-12-31 14:47:53	0.0742426	0.0801603	1.44028	3.0356	8.8971	8.90595	12.5269	15.577	23.6338	27.5423	32.5718	31.251	31.5668	31.606	30.2	21.2645	5.68664	16.3047
1899-12-31 14:47:54	0.074295	0.0800803	1.44094	3.03681	8.89903	8.90889	12.5293	15.5802	23.6372	27.5459	32.5796	31.2557	31.5736	31.6135	30.2114	21.2801	5.69199	16.3179
1899-12-31 14:47:55	0.0746086	0.0805767	1.4414	3.03741	8.90046	8.91043	12.532	15.5822	23.6395	27.5471	32.5794	31.2573	31.5774	31.6161	30.2176	21.2882	5.69561	16.327
1899-12-31 14:47:56	0.0745124	0.0800378	1.44179	3.03822	8.90093	8.91027	12.5308	15.5794	23.6336	27.5357	32.5589	31.2372	31.553	31.5917	30.1868	21.2651	5.69032	16.3093
1899-12-31 14:47:57	0.0746283	0.0811614	1.4424	3.03926	8.90235	8.9115	12.5308	15.5786	23.6308	27.5298	32.5469	31.2273	31.5425	31.5786	30.1722	21.2562	5.68877	16.3035
1899-12-31 14:47:58	0.0745405	0.0812715	1.44306	3.03971	8.90217	8.91154	12.5287	15.5744	23.6226	27.5161	32.518	31.2006	31.5115	31.5491	30.1369	21.2271	5.68221	16.2793
1899-12-31 14:47:59	0.0749586	0.0814976	1.44313	3.04031	8.90363	8.91315	12.5301	15.5762	23.6248	27.5182	32.5249	31.2043	31.5201	31.5563	30.1492	21.2456	5.68782	16.298
1899-12-31 14:48:00	0.0747122	0.08037	1.44379	3.04141	8.90577	8.91497	12.5336	15.5791	23.6287	27.5229	32.5325	31.211	31.5292	31.5659	30.1647	21.2605	5.69303	16.3123
1899-12-31 14:49:15	0.0785164	0.0872425	1.48105	3.09893	9.00948	9.01786	12.6309	15.6625	23.702	27.5124	32.4239	31.0551	31.3663	31.3978	29.9815	21.2394	5.78029	16.3568
1899-12-31 14:49:16	0.0779426	0.0841065	1.48096	3.10028	9.01092	9.01922	12.628	15.6589	23.6966	27.5017	32.3885	31.025	31.3405	31.3734	29.9442	21.2065	5.77373	16.3331
1899-12-31 14:49:17	0.0779109	0.0832303	1.48154	3.10129	9.01293	9.02093	12.6294	15.6595	23.6968	27.4997	32.3816	31.0202	31.3302	31.3661	29.9367	21.2024	5.77455	16.3316
1899-12-31 14:49:18	0.0780702	0.0837874	1.48259	3.10222	9.01366	9.02335	12.6307	15.6602	23.6967	27.4979	32.3783	31.0131	31.3242	31.3582	29.9266	21.1929	5.77301	16.3245
1899-12-31 14:49:19	0.0780482	0.0850526	1.48273	3.10326	9.01547	9.02467	12.6325	15.6622	23.6995	27.4993	32.3791	31.0143	31.3269	31.3622	29.9315	21.1989	5.77546	16.3306
1899-12-31 14:49:20	0.0781484	0.0853438	1.48306	3.10392	9.0167	9.02575	12.6332	15.6621	23.6998	27.4986	32.3782	31.0141	31.3243	31.3582	29.9288	21.1992	5.77663	16.3318
1899-12-31 14:49:21	0.0782075	0.0852276	1.48349	3.10467	9.01709	9.02583	12.6333	15.6618	23.6966	27.4923	32.3652	30.9932	31.3046	31.3406	29.9058	21.1786	5.77207	16.315
1899-12-31 14:49:22	0.0784359	0.0854082	1.48422	3.10544	9.01868	9.02762	12.6342	15.6619	23.6959	27.4897	32.3601	30.985	31.2961	31.3326	29.8949	21.1696	5.77077	16.309
1899-12-31 14:49:23	0.0783544	0.084138	1.48461	3.10603	9.02066	9.02929	12.635	15.6629	23.6978	27.4903	32.359	30.9873	31.2985	31.3329	29.8958	21.174	5.77284	16.3127
1899-12-31 14:49:24	0.0784686	0.0847964	1.48512	3.10678	9.02166	9.02984	12.6373	15.6645	23.6999	27.4923	32.3618	30.9874	31.3005	31.3364	29.9019	21.1817	5.77612	16.3211
1899-12-31 14:49:25	0.0781617	0.084044	1.48518	3.10759	9.02298	9.03237	12.6386	15.6658	23.7001	27.491	32.3612	30.9838	31.2973	31.3317	29.8957	21.1791	5.77622	16.3198
1899-12-31 14:49:26	0.0784152	0.0851618	1.48569	3.10843	9.0243	9.03362	12.6389	15.6651	23.6986	27.4868	32.3509	30.9729	31.284	31.3199	29.8792	21.1666	5.77373	16.3097
1899-12-31 14:49:27	0.0786216	0.0850816	1.48637	3.10894	9.02574	9.03422	12.6392	15.6661	23.6988	27.4856	32.3466	30.9682	31.2794	31.3145	29.8733	21.1611	5.77332	16.3066
1899-12-31 14:49:28	0.0791766	0.0843929	1.48678	3.10958	9.0265	9.03558	12.6408	15.6671	23.6998	27.4855	32.3458	30.9677	31.2796	31.3146	29.8743	21.1662	5.77538	16.3113
1899-12-31 14:49:29	0.0788083	0.0852856	1.48745	3.11059	9.02849	9.03625	12.6418	15.6686	23.7007	27.4849	32.3445	30.9632	31.2769	31.3119	29.8709	21.166	5.77588	16.3115
1899-12-31 14:49:30	0.0789205	0.08477	1.48808	3.11123	9.0294	9.03739	12.6433	15.6683	23.7004	27.4829	32.3412	30.9589	31.2698	31.3071	29.8645	21.1631	5.77588	16.3107
1899-12-31 14:49:31	0.0785368	0.0844804	1.48869	3.11205	9.03012	9.03828	12.6424	15.6676	23.6976	27.4773	32.3297	30.9486	31.2585	31.2931	29.848	21.1508	5.77336	16.3015
1899-12-31 14:49:32	0.0787318	0.0846395	1.48873	3.11245	9.03183	9.04021	12.6442	15.6693	23.6992	27.4795	32.3335	30.9486	31.2625	31.2959	29.853	21.1592	5.77686	16.3096
1899-12-31 14:49:33	0.0790574	0.084135	1.48915	3.11327	9.03226	9.04023	12.6443	15.6692	23.6979	27.4757	32.3252	30.9427	31.2526	31.2876	29.8435	21.1536	5.77604	16.3057
1899-12-31 14:49:34	0.0787779	0.0852412	1.48957	3.11434	9.03405	9.04283	12.6457	15.6704	23.6994	27.4756	32.3253	30.9433	31.2555	31.2876	29.846	21.1595	5.77878	16.3116
1899-12-31 14:49:35	0.0788644	0.0848527	1.49003	3.11461	9.03519	9.04422	12.6473	15.6709	23.7011	27.4765	32.3256	30.9444	31.2571	31.2892	29.8505	21.167	5.7821	16.3209
1899-12-31 14:49:36	0.0789489	0.0849084	1.4906	3.11564	9.03595	9.04523	12.6472	15.6704	23.6988	27.4711	32.3164	30.9325	31.2421	31.2768	29.8367	21.1557	5.78025	16.312
1899-12-31 14:49:37	0.0791933	0.0850719	1.49122	3.11629	9.03683	9.04655	12.6476	15.6703	23.6968	27.4674	32.3118	30.9249	31.2359	31.2677	29.8287	21.1502	5.78033	16.3089
1899-12-31 14:49:38	0.0787886	0.0847659	1.49174	3.11702	9.038	9.04728	12.6488	15.6709	23.6971	27.4665	32.3102	30.92	31.2331	31.2644	29.8269	21.1536	5.78211	16.312
1899-12-31 14:49:39	0.0789632	0.0857309	1.49185	3.11769	9.03948	9.04802	12.6502	15.6713	23.6967	27.4652	32.3044	30.9175	31.2274	31.2615	29.8253	21.1541	5.78379	16.3154
1899-12-31 14:49:40	0.0792835	0.0853941	1.49261	3.11838	9.04045	9.04892	12.6512	15.6726	23.6969	27.4644	32.305	30.9153	31.2275	31.2594	29.8227	21.1556	5.78562	16.3189
1899-12-31 14:49:41	0.0792718	0.0853073	1.49288	3.11923	9.04132	9.05137	12.6502	15.6715	23.6952	27.4603	32.2958	30.904	31.2162	31.2488	29.8107	21.1489	5.78416	16.3123
1899-12-31 14:49:42	0.0789142	0.0855572	1.49336	3.11954	9.04261	9.05065	12.6513	15.6713	23.6938	27.4559	32.2877	30.8931	31.2066	31.2402	29.8004	21.1403	5.78351	16.3074
1899-12-31 14:49:43	0.0789709	0.0846533	1.49386	3.1206	9.04426	9.0534	12.6538	15.6744	23.6989	27.4616	32.2989	30.9071	31.2217	31.253	29.821	21.1615	5.79088	16.3276
1899-12-31 14:49:44	0.0790688	0.0851898	1.49443	3.12117	9.04511	9.05312	12.6539	15.6736	23.6971	27.4561	32.2884	30.8961	31.2085	31.241	29.8066	21.1503	5.78934	16.32
1899-12-31 14:49:45	0.0792718	0.0858099	1.49461	3.12156	9.04612	9.05507	12.6548	15.6738	23.6959	27.4543	32.282	30.8915	31.2016	31.2342	29.7995	21.1478	5.78947	16.3175
1899-12-31 14:49:46	0.0791379	0.0864104	1.49521	3.12245	9.0477	9.05576	12.6561	15.6747	23.6969	27.4548	32.2845	30.8913	31.2026	31.2346	29.8006	21.1526	5.79203	16.3225
1899-12-31 14:49:47	0.0791095	0.0852201	1.49526	3.12337	9.04872	9.05714	12.6558	15.6743	23.6953	27.4504	32.2731	30.877	31.1877	31.2222	29.786	21.1425	5.79043	16.3143
1899-12-31 14:49:48	0.0792321	0.0848813	1.49606	3.12409	9.05051	9.05914	12.6568	15.6773	23.699	27.4552	32.2799	30.8868	31.1994	31.2317	29.8003	21.158	5.79591	16.3288
1899-12-31 14:49:49	0.0792812	0.086116	1.49683	3.12501	9.05154	9.06107	12.6587	15.6769	23.6977	27.4518	32.2759	30.8777	31.1897	31.2238	29.7887	21.1503	5.79524	16.3239
1899-12-31 14:49:50	0.0794265	0.0862756	1.49737	3.12559	9.05282	9.06274	12.6605	15.6797	23.7008	27.4551	32.2795	30.8849	31.1978	31.2317	29.8024	21.1651	5.80074	16.337
1899-12-31 14:49:50	0.0795677	0.0860164	1.49776	3.12647	9.05447	9.06331	12.6616	15.6803	23.7011	27.4537	32.2764	30.88	31.1943	31.2265	29.7977	21.1624	5.80154	16.3372
1899-12-31 14:49:51	0.0796859	0.0858902	1.49815	3.12722	9.05592	9.06441	12.6616	15.6799	23.6998	27.4508	32.2691	30.8713	31.1856	31.2182	29.7857	21.1537	5.80001	16.3304
1899-12-31 14:49:52	0.0797013	0.0858516	1.4985	3.12761	9.05676	9.06532	12.6622	15.6787	23.6969	27.4437	32.2549	30.8601	31.1699	31.2015	29.7623	21.1361	5.79618	16.3177
1899-12-31 14:49:53	0.0798526	0.0857912	1.4989	3.12859	9.0581	9.06586	12.6623	15.6787	23.6966	27.4416	32.2512	30.8504	31.1638	31.1937	29.7536	21.1297	5.79519	16.3112
1899-12-31 14:49:54	0.079908	0.0864317	1.49955	3.12924	9.05883	9.06714	12.6632	15.6787	23.6951	27.4376	32.2432	30.8382	31.154	31.1824	29.7415	21.1205	5.79353	16.3029
1899-12-31 14:49:55	0.0799247	0.0861948	1.49997	3.1301	9.05991	9.06869	12.6645	15.6807	23.6979	27.4409	32.2458	30.8439	31.1618	31.1898	29.7492	21.1318	5.79768	16.3145
1899-12-31 14:49:56	0.080055	0.0861991	1.50035	3.13073	9.06165	9.06982	12.6669	15.6818	23.6989	27.4403	32.2433	30.8422	31.1571	31.1887	29.7476	21.1331	5.79964	16.3179
1899-12-31 14:49:57	0.0799865	0.0862841	1.50105	3.13164	9.06277	9.07108	12.6665	15.6825	23.6982	27.4392	32.2388	30.8345	31.1534	31.1803	29.7392	21.1268	5.7985	16.3118
1899-12-31 14:49:58	0.0797995	0.0858807	1.50164	3.13275	9.06373	9.07306	12.6684	15.6838	23.7013	27.4406	32.2407	30.8368	31.1539	31.184	29.7445	21.1324	5.80123	16.3178
1899-12-31 14:49:59	0.0794709	0.0862506	1.50185	3.13323	9.06559	9.07359	12.6705	15.6848	23.7011	27.4397	32.2386	30.8343	31.152	31.1808	29.7404	21.1304	5.80187	16.3179
1899-12-31 14:50:00	0.0797982	0.0865741	1.50267	3.13374	9.06626	9.07503	12.6704	15.6855	23.7022	27.4396	32.2382	30.8352	31.1505	31.1787	29.7389	21.1302	5.8026	16.3186
1899-12-31 14:51:15	0.0852873	0.0898062	1.53982	3.19321	9.17872	9.1876	12.7935	15.8098	23.8532	27.5452	32.2936	30.8402	31.15	31.1805	29.7058	21.1675	5.89003	16.3931
1899-12-31 14:51:16	0.0836406	0.0902636	1.54021	3.19405	9.18025	9.18706	12.7965	15.8116	23.8556	27.5457	32.2818	30.8409	31.152	31.1794	29.6981	21.1645	5.88956	16.3925
1899-12-31 14:51:17	0.0832638	0.0902378	1.54102	3.1953	9.18212	9.1888	12.7995	15.8155	23.86	27.5501	32.2877	30.8447	31.1554	31.1848	29.7032	21.1697	5.89212	16.3967
1899-12-31 14:51:18	0.0834434	0.0891691	1.54123	3.19609	9.18324	9.19058	12.7996	15.8152	23.859	27.5453	32.2773	30.8324	31.1412	31.1694	29.6794	21.1484	5.88688	16.379
1899-12-31 14:51:19	0.0836093	0.0896239	1.54188	3.19647	9.18432	9.192	12.8014	15.817	23.8618	27.5486	32.2768	30.8347	31.1433	31.1728	29.6834	21.1512	5.88876	16.3827
1899-12-31 14:51:20	0.083313	0.0908297	1.54231	3.19747	9.18591	9.19376	12.8043	15.8203	23.8671	27.5543	32.2871	30.8449	31.1555	31.1832	29.6992	21.166	5.89381	16.3957
1899-12-31 14:51:21	0.0837751	0.0893869	1.5428	3.19857	9.18699	9.19572	12.8056	15.8207	23.8667	27.5526	32.2801	30.8371	31.1454	31.1755	29.6844	21.1532	5.89127	16.3851
1899-12-31 14:51:22	0.0837854	0.0905515	1.54354	3.19924	9.18949	9.19765	12.8068	15.8222	23.8687	27.5544	32.2837	30.8353	31.1437	31.1757	29.6829	21.1516	5.89152	16.3823
1899-12-31 14:51:23	0.0835732	0.0900089	1.54404	3.20008	9.19078	9.19926	12.809	15.8253	23.873	27.5588	32.2875	30.8419	31.1531	31.1819	29.6918	21.1603	5.89521	16.3904
1899-12-31 14:51:24	0.0837084	0.0897514	1.54434	3.20066	9.19233	9.19993	12.8101	15.8266	23.8747	27.56	32.2878	30.8423	31.151	31.1799	29.6868	21.1558	5.895	16.3865
1899-12-31 14:51:25	0.0837213	0.0903718	1.54491	3.20146	9.19375	9.20142	12.8129	15.8294	23.8792	27.5663	32.2947	30.8509	31.1575	31.1883	29.6985	21.1681	5.89962	16.3969
1899-12-31 14:51:26	0.0837306	0.0902198	1.54527	3.20226	9.19587	9.2038	12.8158	15.8332	23.8855	27.5735	32.3046	30.8667	31.1757	31.2048	29.7204	21.1901	5.90679	16.4167
1899-12-31 14:51:27	0.0841072	0.090824	1.54565	3.20343	9.19814	9.20588	12.8196	15.8379	23.8939	27.5856	32.3198	30.884	31.1969	31.2256	29.7475	21.2151	5.9151	16.4371
1899-12-31 14:51:28	0.0843512	0.090411	1.54646	3.20423	9.19924	9.20675	12.8213	15.8396	23.8956	27.5858	32.317	30.8844	31.1937	31.2248	29.7423	21.2103	5.91503	16.4343
1899-12-31 14:51:29	0.0841792	0.0900917	1.54714	3.20467	9.20074	9.20876	12.8224	15.841	23.8963	27.5855	32.3184	30.8777	31.1902	31.2202	29.7332	21.2025	5.91402	16.429
1899-12-31 14:51:30	0.0839467	0.0911945	1.54761	3.20577	9.20225	9.20917	12.8241	15.8424	23.8988	27.5882	32.3182	30.88	31.1934	31.2233	29.7368	21.2083	5.91668	16.4321
1899-12-31 14:51:31	0.0841413	0.0898624	1.54824	3.20647	9.20342	9.21068	12.825	15.8423	23.898	27.5854	32.311	30.8727	31.1826	31.2126	29.7222	21.1933	5.91444	16.423
1899-12-31 14:51:32	0.0840881	0.0907471	1.54829	3.20705	9.20483	9.21252	12.8261	15.8443	23.9	27.5865	32.3112	30.8707	31.1809	31.2119	29.7198	21.1926	5.91537	16.4224
1899-12-31 14:51:33	0.0848187	0.0906458	1.54896	3.20808	9.20604	9.21385	12.8283	15.8464	23.903	27.5889	32.3179	30.8742	31.1877	31.2171	29.7266	21.1999	5.91903	16.4297
1899-12-31 14:51:34	0.0847718	0.091019	1.5494	3.20889	9.20763	9.21485	12.8296	15.8464	23.9033	27.5871	32.311	30.8698	31.1795	31.2113	29.7205	21.1949	5.9189	16.4267
1899-12-31 14:51:35	0.0845881	0.0912232	1.54966	3.2092	9.20845	9.21566	12.83	15.8468	23.9033	27.5868	32.309	30.8649	31.1765	31.2079	29.7161	21.1934	5.91967	16.4257
1899-12-31 14:51:36	0.0847957	0.0912806	1.55033	3.20986	9.20999	9.21578	12.8316	15.8475	23.9029	27.5848	32.3066	30.8588	31.1689	31.2004	29.7059	21.1854	5.91895	16.4206
1899-12-31 14:51:37	0.0845245	0.0904738	1.55073	3.2109	9.21119	9.21794	12.8305	15.8468	23.9015	27.5798	32.2956	30.8479	31.1557	31.186	29.6879	21.1714	5.91629	16.4108
1899-12-31 14:51:38	0.0845157	0.091301	1.55129	3.21171	9.21161	9.21956	12.8323	15.8478	23.9013	27.579	32.2925	30.8398	31.1504	31.1789	29.6796	21.1669	5.91616	16.4069
1899-12-31 14:51:39	0.0844158	0.0914057	1.55185	3.21251	9.21342	9.22173	12.833	15.8483	23.9011	27.5765	32.2873	30.8338	31.1446	31.1742	29.674	21.1666	5.91752	16.4081
1899-12-31 14:51:40	0.084596	0.0910031	1.55209	3.21306	9.21471	9.22148	12.8349	15.8494	23.9027	27.5779	32.2903	30.8354	31.1458	31.176	29.6801	21.1754	5.92126	16.4172
1899-12-31 14:51:41	0.0847002	0.0908459	1.55277	3.21372	9.21608	9.22328	12.8342	15.8485	23.8999	27.5725	32.2801	30.824	31.1353	31.1627	29.6644	21.1652	5.92	16.4105
1899-12-31 14:51:42	0.0848664	0.091547	1.553	3.21419	9.21644	9.22414	12.8339	15.846	23.8947	27.5617	32.2617	30.7989	31.1117	31.1385	29.6319	21.1379	5.91348	16.3872
1899-12-31 14:51:43	0.0844696	0.0916053	1.5534	3.21528	9.21809	9.22524	12.8353	15.8478	23.8986	27.5655	32.2666	30.8061	31.1183	31.1459	29.6435	21.1548	5.91898	16.4038
1899-12-31 14:51:44	0.0847754	0.0915022	1.5542	3.21604	9.21846	9.22672	12.8348	15.8465	23.8945	27.5578	32.2509	30.7872	31.0974	31.1262	29.6178	21.132	5.91408	16.3864
1899-12-31 14:51:45	0.0846277	0.0916755	1.55439	3.21688	9.22042	9.22848	12.8378	15.8504	23.901	27.5666	32.2638	30.806	31.1205	31.146	29.6458	21.1635	5.92354	16.4152
1899-12-31 14:51:46	0.0849352	0.0922556	1.55483	3.21765	9.22195	9.23019	12.839	15.8512	23.9018	27.5672	32.264	30.8022	31.1176	31.1437	29.6449	21.1653	5.92484	16.4177
1899-12-31 14:51:47	0.0847594	0.0916779	1.55534	3.21801	9.2231	9.23014	12.8397	15.8513	23.9009	27.564	32.2594	30.7943	31.1089	31.1326	29.6325	21.1569	5.92311	16.4116
1899-12-31 14:51:48	0.0848706	0.091804	1.55612	3.21891	9.22511	9.23255	12.8414	15.8535	23.9038	27.567	32.2599	30.7963	31.1123	31.1363	29.6375	21.1619	5.92586	16.4173
1899-12-31 14:51:49	0.0849974	0.0913885	1.55669	3.21984	9.22599	9.23391	12.8433	15.8556	23.9066	27.5693	32.2621	30.796	31.1116	31.1391	29.6385	21.1659	5.92756	16.4194
1899-12-31 14:51:50	0.0849465	0.0916072	1.55731	3.2209	9.22772	9.23491	12.845	15.8576	23.9093	27.5723	32.2649	30.8007	31.113	31.1405	29.6399	21.1658	5.92938	16.4216
1899-12-31 14:51:50	0.084877	0.0910107	1.55726	3.22133	9.22959	9.23675	12.848	15.8597	23.9131	27.5751	32.2699	30.8067	31.1202	31.1452	29.6434	21.1706	5.93154	16.424
1899-12-31 14:51:51	0.0850152	0.0911745	1.55797	3.22243	9.23141	9.23889	12.8511	15.8638	23.918	27.5813	32.2768	30.8126	31.1233	31.1537	29.6548	21.1795	5.9349	16.4306
1899-12-31 14:51:52	0.0851113	0.0917615	1.55853	3.22322	9.23377	9.2412	12.8534	15.8673	23.9247	27.5898	32.2873	30.8285	31.1394	31.1688	29.6727	21.196	5.94071	16.447
1899-12-31 14:51:53	0.0852471	0.091564	1.55912	3.224	9.235	9.24304	12.8573	15.8715	23.9301	27.5964	32.2941	30.8377	31.1497	31.178	29.6844	21.2045	5.94391	16.4537
1899-12-31 14:51:54	0.0850804	0.0915982	1.5598	3.22495	9.23657	9.24514	12.8581	15.8713	23.9304	27.5937	32.2885	30.8276	31.1376	31.1666	29.6653	21.1869	5.93935	16.4364
1899-12-31 14:51:55	0.0849641	0.0916496	1.56005	3.22543	9.23835	9.2452	12.8587	15.8733	23.9329	27.5965	32.2895	30.8277	31.1367	31.1672	29.661	21.1822	5.93911	16.4333
1899-12-31 14:51:56	0.0852188	0.0916041	1.56053	3.22648	9.23969	9.24755	12.8614	15.8757	23.9368	27.6003	32.293	30.8315	31.1406	31.17	29.6635	21.1817	5.93997	16.4339
1899-12-31 14:51:57	0.085387	0.092282	1.5612	3.22723	9.24173	9.24956	12.864	15.8794	23.9413	27.6059	32.2984	30.838	31.1459	31.1773	29.6704	21.1854	5.94184	16.4364
1899-12-31 14:51:58	0.0857566	0.0925265	1.56166	3.22812	9.24313	9.2514	12.8669	15.8823	23.946	27.611	32.3054	30.8434	31.1535	31.1835	29.6764	21.1893	5.94376	16.4387
1899-12-31 14:51:59	0.0852957	0.0917548	1.5622	3.22909	9.24578	9.25315	12.87	15.8866	23.9526	27.6193	32.3142	30.8563	31.1683	31.1954	29.6896	21.2003	5.94795	16.4486
1899-12-31 14:53:15	0.0899051	0.095417	1.59983	3.29003	9.35845	9.36744	12.9941	16.0148	24.118	27.7475	32.3825	30.8707	31.1732	31.2045	29.6341	21.2028	6.02018	16.4884
1899-12-31 14:53:16	0.0891317	0.0957842	1.60072	3.28999	9.35928	9.36612	12.9968	16.0157	24.1212	27.7481	32.3794	30.876	31.181	31.2059	29.6371	21.203	6.02116	16.489
1899-12-31 14:53:17	0.0892471	0.0965898	1.60137	3.29139	9.36187	9.3684	13.0007	16.0199	24.1283	27.7562	32.3915	30.8893	31.1912	31.2207	29.6562	21.2212	6.02784	16.5052
1899-12-31 14:53:18	0.0891375	0.0957196	1.60207	3.29178	9.36321	9.3697	13.0022	16.0221	24.1302	27.758	32.3913	30.8868	31.1957	31.2215	29.6567	21.2226	6.02957	16.5088
1899-12-31 14:53:19	0.0891137	0.0969534	1.60251	3.29261	9.36429	9.37093	13.0038	16.0234	24.1312	27.7587	32.3892	30.8883	31.1927	31.2196	29.6553	21.2232	6.03091	16.5101
1899-12-31 14:53:20	0.0888956	0.0962118	1.60291	3.29354	9.36521	9.37199	13.0033	16.0233	24.13	27.7554	32.3819	30.8796	31.1845	31.2103	29.6422	21.2133	6.02896	16.5014
1899-12-31 14:53:21	0.0894678	0.0961551	1.60322	3.29439	9.36723	9.37303	13.0045	16.0232	24.1297	27.7513	32.3717	30.8696	31.1739	31.1996	29.6285	21.2034	6.02714	16.494
1899-12-31 14:53:22	0.0896227	0.0954392	1.60388	3.29489	9.3682	9.37486	13.0059	16.0241	24.1305	27.7509	32.3696	30.865	31.1711	31.1951	29.6219	21.2009	6.02711	16.4924
1899-12-31 14:53:23	0.0897712	0.0960209	1.6045	3.29591	9.36897	9.37606	13.0063	16.0248	24.131	27.7512	32.3675	30.8647	31.1672	31.1935	29.6208	21.2022	6.02852	16.4951
1899-12-31 14:53:23	0.0898198	0.0965331	1.60484	3.29646	9.37101	9.37661	13.0084	16.0258	24.132	27.7506	32.3689	30.8594	31.1652	31.1893	29.6162	21.1997	6.02868	16.4946
1899-12-31 14:53:24	0.0895787	0.0954474	1.60547	3.29747	9.37157	9.37866	13.0096	16.0271	24.1327	27.7501	32.3659	30.8579	31.1599	31.1872	29.6143	21.202	6.03011	16.4969
1899-12-31 14:53:25	0.0895348	0.0962788	1.60571	3.29827	9.37321	9.38077	13.0107	16.0274	24.1331	27.7488	32.357	30.8513	31.1546	31.1795	29.6041	21.1957	6.02943	16.4928
1899-12-31 14:53:26	0.0900606	0.0970347	1.60613	3.29893	9.37385	9.38124	13.0123	16.0286	24.1342	27.7494	32.3586	30.851	31.1518	31.1801	29.6026	21.1968	6.03071	16.4951
1899-12-31 14:53:27	0.0895233	0.096227	1.60686	3.29945	9.37573	9.3829	13.013	16.0294	24.1338	27.7474	32.3535	30.842	31.1455	31.1738	29.596	21.1921	6.02987	16.4914
1899-12-31 14:53:28	0.089764	0.0964157	1.60745	3.30034	9.3763	9.38503	13.0135	16.031	24.1363	27.7503	32.3573	30.8471	31.1487	31.1777	29.5974	21.1963	6.03224	16.4973
1899-12-31 14:53:29	0.0897125	0.0962834	1.60808	3.30125	9.3786	9.38523	13.0149	16.0309	24.1361	27.7471	32.3489	30.8357	31.137	31.1655	29.5818	21.1822	6.02871	16.4855
1899-12-31 14:53:30	0.0900877	0.096545	1.60847	3.30188	9.37951	9.38646	13.0166	16.0318	24.1364	27.7465	32.3441	30.8277	31.1289	31.1579	29.5729	21.172	6.02738	16.4787
1899-12-31 14:53:31	0.0897764	0.096574	1.60866	3.30275	9.38107	9.38797	13.0166	16.0328	24.1384	27.7471	32.3404	30.8257	31.1267	31.1543	29.5671	21.1704	6.02706	16.4768
1899-12-31 14:53:32	0.0899816	0.0965884	1.60901	3.3035	9.38306	9.38977	13.0191	16.0358	24.1428	27.7519	32.3481	30.835	31.1357	31.164	29.5794	21.1831	6.0317	16.4884
1899-12-31 14:53:33	0.0903288	0.0973735	1.60964	3.30422	9.3847	9.39042	13.0208	16.0361	24.1425	27.7497	32.3424	30.8266	31.1263	31.1525	29.5641	21.1667	6.02771	16.4762
1899-12-31 14:53:34	0.0905504	0.0965487	1.61007	3.3049	9.38542	9.39219	13.023	16.0376	24.1431	27.7492	32.3398	30.8244	31.1219	31.1488	29.5578	21.1616	6.027	16.4732
1899-12-31 14:53:35	0.0902922	0.0964301	1.61074	3.3059	9.38732	9.39437	13.0258	16.0407	24.1484	27.7552	32.3466	30.8276	31.1304	31.1566	29.5657	21.1702	6.03	16.4806
1899-12-31 14:53:36	0.0905689	0.0956946	1.61119	3.30663	9.38899	9.39517	13.0279	16.043	24.1525	27.7597	32.3536	30.8351	31.136	31.1617	29.5717	21.1748	6.03198	16.4838
1899-12-31 14:53:37	0.0904947	0.096483	1.61181	3.30758	9.39078	9.398	13.0302	16.0455	24.1561	27.764	32.3577	30.84	31.14	31.1663	29.5742	21.1781	6.03377	16.4861
1899-12-31 14:53:38	0.0901624	0.0973848	1.61237	3.30872	9.39276	9.39986	13.032	16.0488	24.1615	27.7702	32.3673	30.8485	31.1481	31.1748	29.5832	21.1861	6.03689	16.492
1899-12-31 14:53:39	0.0903747	0.0961387	1.61282	3.30935	9.39487	9.4014	13.0349	16.0521	24.1659	27.7739	32.374	30.8516	31.1519	31.1797	29.5862	21.1877	6.03853	16.4943
1899-12-31 14:53:40	0.0904173	0.0977861	1.61359	3.31016	9.39641	9.40357	13.0379	16.0555	24.1713	27.7812	32.3829	30.862	31.1643	31.1904	29.5965	21.1963	6.04211	16.5024
1899-12-31 14:53:41	0.0901892	0.0975542	1.61423	3.31091	9.39831	9.40496	13.0399	16.058	24.1751	27.785	32.3859	30.8653	31.1667	31.1921	29.5974	21.1959	6.04322	16.5023
1899-12-31 14:53:42	0.0902168	0.0968788	1.61452	3.3119	9.40003	9.40698	13.0426	16.0627	24.1823	27.7946	32.3982	30.881	31.1821	31.2075	29.6167	21.213	6.04895	16.5176
1899-12-31 14:53:43	0.0903166	0.0967122	1.61499	3.31264	9.40207	9.40838	13.0447	16.0645	24.185	27.7964	32.3994	30.8809	31.181	31.2072	29.6133	21.2086	6.04898	16.5137
1899-12-31 14:53:44	0.090602	0.0974629	1.6155	3.31351	9.40346	9.40924	13.0474	16.0663	24.1868	27.7976	32.3986	30.8786	31.1789	31.2057	29.6071	21.1991	6.04713	16.505
1899-12-31 14:53:45	0.0901695	0.0979278	1.616	3.31444	9.40481	9.41208	13.0495	16.0699	24.1927	27.805	32.4086	30.8878	31.1913	31.2165	29.6206	21.2105	6.05138	16.5158
1899-12-31 14:53:46	0.0904499	0.0978118	1.61647	3.31518	9.40717	9.41384	13.0524	16.0728	24.196	27.808	32.4111	30.8878	31.1902	31.217	29.6162	21.2032	6.04953	16.508
1899-12-31 14:53:47	0.0907569	0.0974925	1.61739	3.31635	9.40932	9.41644	13.0559	16.0787	24.2066	27.8222	32.4304	30.9112	31.2137	31.2419	29.6497	21.2321	6.05812	16.5314
1899-12-31 14:53:48	0.0907612	0.0975224	1.61774	3.31689	9.41119	9.41738	13.0586	16.0811	24.2099	27.8245	32.4309	30.9111	31.2115	31.2415	29.6437	21.2223	6.05652	16.5242
1899-12-31 14:53:49	0.0907478	0.0976792	1.6183	3.31818	9.41348	9.42013	13.0604	16.083	24.2125	27.8272	32.4324	30.9123	31.2132	31.2394	29.6375	21.2136	6.05456	16.5154
1899-12-31 14:53:50	0.0909186	0.098109	1.61871	3.31902	9.41496	9.42143	13.0631	16.0867	24.2185	27.8344	32.4405	30.9232	31.223	31.2519	29.6499	21.2224	6.05797	16.5219
1899-12-31 14:53:51	0.0907663	0.096844	1.61937	3.31978	9.41642	9.42322	13.0671	16.0906	24.2242	27.8414	32.4519	30.9322	31.2358	31.2619	29.6594	21.2291	6.06107	16.528
1899-12-31 14:53:52	0.090676	0.0979242	1.61992	3.32042	9.41874	9.42588	13.0697	16.0934	24.2284	27.8467	32.4554	30.9371	31.238	31.2642	29.6603	21.2261	6.06117	16.5242
1899-12-31 14:53:53	0.0909344	0.0981043	1.6204	3.32145	9.42133	9.42781	13.0739	16.0989	24.2374	27.8584	32.4747	30.9595	31.2617	31.2862	29.6867	21.2495	6.06876	16.5449
1899-12-31 14:53:54	0.0911907	0.0981007	1.62113	3.32252	9.4225	9.42976	13.0752	16.1017	24.2413	27.8623	32.479	30.9613	31.2635	31.2881	29.6857	21.244	6.06791	16.5396
1899-12-31 14:53:55	0.0908667	0.0968855	1.62151	3.32297	9.42393	9.43142	13.0785	16.1055	24.2478	27.8698	32.496	30.9725	31.2744	31.3006	29.6993	21.2551	6.07154	16.5473
1899-12-31 14:53:56	0.0909428	0.0972655	1.62216	3.32399	9.42579	9.43396	13.0806	16.1083	24.2517	27.8751	32.4989	30.9763	31.2771	31.3039	29.7003	21.2517	6.07153	16.544
1899-12-31 14:53:57	0.0910889	0.0984718	1.62245	3.32533	9.4277	9.43501	13.0823	16.1108	24.2546	27.8771	32.4973	30.976	31.2763	31.3048	29.6956	21.245	6.07077	16.5383
1899-12-31 14:53:58	0.0912314	0.0981705	1.62298	3.3258	9.4291	9.43658	13.0858	16.1142	24.2611	27.8855	32.5104	30.9855	31.2871	31.3163	29.708	21.2521	6.0736	16.5433
1899-12-31 14:53:59	0.0912974	0.0983746	1.62373	3.32696	9.43188	9.43929	13.0891	16.1177	24.2669	27.8925	32.5185	31.0005	31.2965	31.3263	29.7158	21.2572	6.07571	16.5467
1899-12-31 14:54:00	0.0916299	0.0972709	1.62459	3.32771	9.43377	9.44028	13.0932	16.1219	24.2732	27.9007	32.5316	31.0077	31.31	31.3372	29.7278	21.2685	6.07902	16.554
1899-12-31 14:55:15	0.0953393	0.0994226	1.66619	3.39583	9.58766	9.58929	13.3294	16.4146	24.7301	28.4532	33.2163	31.6986	32.0465	32.0715	30.3928	21.6587	6.24239	16.83
1899-12-31 14:55:16	0.0952453	0.102028	1.66707	3.39776	9.58798	9.59415	13.3298	16.4181	24.7345	28.4564	33.2229	31.7119	32.0481	32.0725	30.39	21.6558	6.24233	16.8305
1899-12-31 14:55:17	0.0956184	0.103013	1.6676	3.39869	9.59143	9.59678	13.3339	16.4229	24.7431	28.4656	33.236	31.7257	32.0614	32.0875	30.4058	21.6696	6.24681	16.8414
1899-12-31 14:55:18	0.0953255	0.101877	1.66825	3.40003	9.59287	9.59897	13.3361	16.4254	24.7466	28.4694	33.2388	31.7273	32.0636	32.0897	30.4066	21.6693	6.24716	16.84
1899-12-31 14:55:19	0.0951898	0.102255	1.66859	3.40107	9.59433	9.60029	13.338	16.428	24.7505	28.4741	33.2459	31.7328	32.0684	32.0957	30.4115	21.6723	6.24898	16.8436
1899-12-31 14:55:20	0.0952243	0.102801	1.66913	3.40199	9.5965	9.60252	13.342	16.4329	24.7587	28.4841	33.2621	31.7503	32.087	32.1151	30.4326	21.692	6.25546	16.8609
1899-12-31 14:55:21	0.0951043	0.10165	1.66967	3.40263	9.59825	9.60468	13.3438	16.435	24.7609	28.4867	33.259	31.7501	32.0845	32.1107	30.4229	21.6786	6.25216	16.8459
1899-12-31 14:55:22	0.095825	0.102313	1.67051	3.40392	9.60048	9.60624	13.3489	16.4398	24.7689	28.4964	33.2743	31.7614	32.0975	32.1256	30.4383	21.6896	6.25614	16.8548
1899-12-31 14:55:23	0.0960041	0.102431	1.67118	3.40465	9.60292	9.60824	13.3507	16.4437	24.7741	28.5023	33.283	31.7684	32.1027	32.1308	30.4376	21.684	6.25524	16.8484
1899-12-31 14:55:24	0.0953886	0.102953	1.67115	3.40547	9.60556	9.6118	13.3552	16.4499	24.7846	28.5156	33.3045	31.7873	32.1264	32.1532	30.4646	21.7024	6.26092	16.8639
1899-12-31 14:55:25	0.0958929	0.102778	1.67235	3.40675	9.60716	9.61357	13.3591	16.4543	24.7925	28.5243	33.3182	31.7976	32.1362	32.1651	30.4741	21.7044	6.26179	16.8647
1899-12-31 14:55:26	0.0958868	0.102686	1.67269	3.40767	9.60988	9.61627	13.3627	16.4603	24.8006	28.5366	33.3359	31.812	32.153	32.1829	30.4887	21.7137	6.26479	16.8714
1899-12-31 14:55:27	0.0958379	0.102892	1.67331	3.40872	9.61246	9.61806	13.3665	16.4656	24.809	28.5475	33.3464	31.8252	32.1705	32.1973	30.5005	21.7184	6.26654	16.8745
1899-12-31 14:55:28	0.096022	0.10276	1.67397	3.40959	9.61449	9.62055	13.3712	16.4706	24.8172	28.5578	33.3573	31.8331	32.1816	32.2099	30.5071	21.72	6.26696	16.8732
1899-12-31 14:55:29	0.0962215	0.102522	1.67452	3.41045	9.61774	9.62383	13.3755	16.4767	24.8268	28.5697	33.3715	31.8542	32.1985	32.2275	30.5252	21.7299	6.26983	16.8793
1899-12-31 14:55:30	0.0959896	0.102537	1.67523	3.41151	9.61945	9.62558	13.3796	16.4813	24.834	28.5795	33.384	31.8667	32.2115	32.2382	30.5331	21.7305	6.27046	16.8781
1899-12-31 14:55:31	0.0961307	0.10275	1.67585	3.41258	9.62197	9.62753	13.3836	16.4877	24.8435	28.5904	33.3978	31.8816	32.2308	32.2547	30.5517	21.743	6.2747	16.8879
1899-12-31 14:55:32	0.095804	0.102994	1.67651	3.41345	9.62456	9.63031	13.3892	16.4924	24.8519	28.6029	33.4168	31.9018	32.2506	32.2721	30.5707	21.7539	6.27884	16.8963
1899-12-31 14:55:33	0.0960977	0.102916	1.67702	3.41453	9.62616	9.6324	13.3921	16.4968	24.8588	28.6108	33.4282	31.9122	32.2609	32.2823	30.5809	21.7583	6.28073	16.8991
1899-12-31 14:55:34	0.0964758	0.103803	1.67737	3.41528	9.62843	9.63417	13.3949	16.5008	24.8668	28.6199	33.4412	31.9236	32.2759	32.2964	30.5908	21.7662	6.28417	16.9065
1899-12-31 14:55:35	0.0962953	0.103562	1.67805	3.41664	9.63058	9.63705	13.3975	16.5046	24.8711	28.6267	33.4481	31.9267	32.2847	32.3044	30.5947	21.768	6.28562	16.9067
1899-12-31 14:55:36	0.0965716	0.103298	1.67868	3.41742	9.63233	9.63898	13.4005	16.5084	24.8774	28.6326	33.4532	31.9357	32.2918	32.3135	30.6037	21.775	6.28861	16.9117
1899-12-31 14:55:37	0.0965938	0.103692	1.67915	3.41837	9.63448	9.6415	13.4038	16.5129	24.8833	28.6402	33.4637	31.9472	32.3041	32.3253	30.6185	21.7884	6.29375	16.9231
1899-12-31 14:55:38	0.0967516	0.102688	1.67974	3.41927	9.63615	9.64168	13.4057	16.514	24.8857	28.6424	33.4644	31.9461	32.3044	32.3253	30.6171	21.7877	6.29505	16.9228
1899-12-31 14:55:39	0.0967357	0.10269	1.68015	3.41986	9.63838	9.64441	13.4077	16.5163	24.8889	28.6443	33.4656	31.9472	32.3039	32.325	30.6186	21.7885	6.29648	16.9241
1899-12-31 14:55:40	0.096608	0.103213	1.68107	3.42066	9.63949	9.64553	13.4087	16.5175	24.891	28.6458	33.4652	31.9456	32.3048	32.3262	30.6179	21.7915	6.29836	16.9269
1899-12-31 14:55:41	0.0964626	0.103811	1.68153	3.42152	9.64024	9.64672	13.4095	16.5187	24.8915	28.6436	33.4615	31.9408	32.3022	32.3188	30.6076	21.7836	6.29748	16.9221
1899-12-31 14:55:42	0.0964001	0.102595	1.68206	3.42244	9.64181	9.64831	13.4126	16.5203	24.8937	28.6449	33.4633	31.9416	32.3017	32.3205	30.6113	21.7896	6.29987	16.9272
1899-12-31 14:55:43	0.0964583	0.10374	1.68242	3.42297	9.6441	9.65001	13.413	16.5208	24.8935	28.6434	33.4578	31.9358	32.293	32.3127	30.6006	21.7805	6.29828	16.9213
1899-12-31 14:55:44	0.0971335	0.10366	1.68283	3.42404	9.64494	9.65192	13.414	16.5222	24.8964	28.6454	33.4619	31.9371	32.2933	32.3145	30.6024	21.7849	6.30003	16.9238
1899-12-31 14:55:45	0.0968907	0.104327	1.68332	3.42486	9.64636	9.65346	13.4153	16.5245	24.8978	28.6467	33.4593	31.9366	32.2917	32.3147	30.6028	21.7859	6.30131	16.926
1899-12-31 14:55:46	0.0966675	0.10373	1.68386	3.42583	9.64812	9.65425	13.4182	16.5266	24.9002	28.6497	33.4633	31.9396	32.2964	32.3163	30.6048	21.7885	6.30268	16.9283
1899-12-31 14:55:47	0.0970499	0.103874	1.68446	3.42666	9.65016	9.65558	13.4202	16.5272	24.9019	28.6499	33.4633	31.9364	32.2956	32.3145	30.6017	21.7885	6.30328	16.9291
1899-12-31 14:55:48	0.0972514	0.103309	1.68492	3.42733	9.65162	9.65826	13.4213	16.5296	24.9047	28.6527	33.4635	31.9408	32.2968	32.3163	30.6047	21.7923	6.30531	16.9328
1899-12-31 14:55:48	0.0968273	0.104589	1.68562	3.42805	9.65338	9.65952	13.4227	16.5311	24.9066	28.6536	33.4621	31.9379	32.2939	32.3147	30.6012	21.7892	6.30521	16.9303
1899-12-31 14:55:49	0.0970491	0.104613	1.68627	3.42901	9.65551	9.66189	13.4266	16.536	24.915	28.6641	33.4768	31.9527	32.3156	32.3328	30.6266	21.8106	6.31277	16.9507
1899-12-31 14:55:50	0.0970253	0.103505	1.68657	3.43018	9.65721	9.66355	13.4296	16.5395	24.9199	28.6695	33.4836	31.9598	32.3218	32.3398	30.6305	21.8135	6.31451	16.9525
1899-12-31 14:55:51	0.0972181	0.104025	1.68739	3.43089	9.65987	9.66643	13.4319	16.5428	24.9239	28.6745	33.4856	31.962	32.3214	32.341	30.6281	21.8067	6.31371	16.9455
1899-12-31 14:55:52	0.0971975	0.103865	1.68783	3.43196	9.66166	9.66771	13.4363	16.5484	24.9328	28.6858	33.4969	31.9748	32.3377	32.3562	30.643	21.8159	6.31724	16.9519
1899-12-31 14:55:53	0.0970428	0.104034	1.68853	3.43314	9.6646	9.67033	13.4416	16.554	24.9423	28.6984	33.5148	31.9928	32.3564	32.3748	30.6597	21.8255	6.32086	16.9588
1899-12-31 14:55:54	0.0974072	0.103402	1.68902	3.43411	9.66691	9.67341	13.4466	16.5607	24.953	28.7129	33.5336	32.0148	32.3769	32.3966	30.6793	21.8366	6.32471	16.9652
1899-12-31 14:55:55	0.0975466	0.103782	1.68975	3.43524	9.67017	9.6765	13.4525	16.5685	24.9667	28.7314	33.5602	32.0439	32.4075	32.426	30.7094	21.8579	6.3313	16.9791
1899-12-31 14:55:56	0.0974603	0.104315	1.69035	3.43631	9.67301	9.67978	13.4574	16.5757	24.9785	28.7465	33.5813	32.0646	32.4282	32.4466	30.7274	21.8626	6.33365	16.9816
1899-12-31 14:55:57	0.0978387	0.104715	1.69087	3.43737	9.6758	9.68173	13.4629	16.583	24.99	28.7617	33.6043	32.0905	32.4505	32.4713	30.7501	21.875	6.33815	16.9908
1899-12-31 14:55:58	0.097689	0.104998	1.69148	3.43854	9.67812	9.68411	13.468	16.5897	25.0025	28.7773	33.625	32.1141	32.4737	32.4929	30.7699	21.8879	6.34158	16.9979
1899-12-31 14:55:59	0.097785	0.103993	1.69243	3.43949	9.68102	9.68717	13.4727	16.596	25.0117	28.7895	33.6367	32.1263	32.4905	32.5104	30.7824	21.8922	6.34362	16.9994
1899-12-31 14:57:15	0.102144	0.108627	1.73725	3.51384	9.84586	9.8504	13.7227	16.9048	25.4755	29.3388	34.3074	32.7809	33.1648	33.1849	31.3717	22.231	6.50024	17.2484
1899-12-31 14:57:16	0.101979	0.109441	1.73746	3.51471	9.84783	9.85344	13.7251	16.9081	25.4807	29.3452	34.313	32.7935	33.1802	33.1957	31.3821	22.2411	6.5038	17.255
1899-12-31 14:57:17	0.101608	0.110051	1.73831	3.51554	9.84991	9.85435	13.727	16.9097	25.4818	29.3435	34.3106	32.7844	33.1703	33.1858	31.3676	22.2273	6.50126	17.2427
1899-12-31 14:57:18	0.101407	0.109498	1.73893	3.51664	9.85195	9.85777	13.7291	16.9128	25.4866	29.3481	34.3111	32.7901	33.1769	33.1915	31.3742	22.2348	6.50425	17.2492
1899-12-31 14:57:19	0.101793	0.109672	1.7396	3.5179	9.85442	9.85974	13.7327	16.9173	25.494	29.3581	34.3286	32.8051	33.1941	33.209	31.3977	22.2586	6.51168	17.2713
1899-12-31 14:57:20	0.102189	0.108995	1.74005	3.51877	9.8564	9.86167	13.7361	16.9195	25.4973	29.3611	34.3305	32.809	33.1952	33.212	31.4004	22.2606	6.51281	17.2733
1899-12-31 14:57:21	0.102322	0.108217	1.74074	3.51957	9.85782	9.86289	13.7364	16.9204	25.4979	29.3599	34.3252	32.7976	33.1876	33.2033	31.3853	22.2458	6.50898	17.2602
1899-12-31 14:57:22	0.102314	0.109198	1.74108	3.52019	9.85944	9.86566	13.7395	16.924	25.5026	29.3653	34.3304	32.8045	33.1931	33.2076	31.3883	22.2476	6.5101	17.2617
1899-12-31 14:57:23	0.102225	0.110003	1.74204	3.52158	9.8622	9.86788	13.7437	16.9292	25.511	29.3751	34.3428	32.8151	33.2051	33.2224	31.4017	22.2552	6.51332	17.2686
1899-12-31 14:57:24	0.102249	0.109624	1.74251	3.52231	9.86411	9.87001	13.7463	16.9322	25.5148	29.3787	34.3451	32.8169	33.2033	33.2196	31.3931	22.2427	6.51009	17.2545
1899-12-31 14:57:24	0.102296	0.109208	1.74339	3.52341	9.86714	9.87372	13.7539	16.9404	25.527	29.396	34.3719	32.8415	33.2298	33.2495	31.4244	22.2677	6.51839	17.276
1899-12-31 14:57:25	0.102368	0.109621	1.74405	3.52477	9.86967	9.87544	13.7589	16.9474	25.5395	29.4114	34.3933	32.8662	33.2547	33.2747	31.4553	22.288	6.52584	17.2928
1899-12-31 14:57:26	0.102252	0.109394	1.74444	3.52598	9.87343	9.879	13.7623	16.9536	25.549	29.4238	34.4093	32.8879	33.2726	33.2932	31.4705	22.297	6.52924	17.2982
1899-12-31 14:57:27	0.102768	0.109977	1.74519	3.52687	9.8752	9.88162	13.766	16.9575	25.5546	29.431	34.4189	32.893	33.2772	33.2981	31.4714	22.293	6.52859	17.294
1899-12-31 14:57:28	0.102783	0.109887	1.74588	3.52799	9.87785	9.88454	13.7705	16.9635	25.5648	29.4433	34.432	32.9132	33.2945	33.3159	31.4875	22.3036	6.53259	17.3008
1899-12-31 14:57:29	0.102556	0.109965	1.74664	3.52939	9.88149	9.88556	13.7756	16.9705	25.5766	29.4582	34.4526	32.9343	33.318	33.338	31.5084	22.3202	6.53804	17.3126
1899-12-31 14:57:30	0.102789	0.110602	1.74733	3.53051	9.88333	9.88996	13.7811	16.9763	25.585	29.4696	34.4661	32.9501	33.3341	33.3547	31.5233	22.3283	6.54067	17.3177
1899-12-31 14:57:31	0.10291	0.109141	1.74787	3.53105	9.88587	9.89083	13.783	16.9803	25.5909	29.4765	34.473	32.9562	33.3415	33.3614	31.5246	22.3217	6.53934	17.3109
1899-12-31 14:57:32	0.102923	0.110724	1.74852	3.53227	9.88785	9.89426	13.7885	16.9868	25.6015	29.4904	34.4892	32.9749	33.364	33.3812	31.5466	22.3378	6.54447	17.3235
1899-12-31 14:57:33	0.103037	0.110182	1.74918	3.53345	9.89098	9.89664	13.7928	16.9918	25.6098	29.4995	34.4993	32.9848	33.3747	33.3947	31.5582	22.3445	6.54693	17.3281
1899-12-31 14:57:34	0.102909	0.108971	1.74962	3.53478	9.89421	9.8995	13.7966	16.9979	25.6188	29.5116	34.5178	33.0002	33.3912	33.4132	31.5791	22.362	6.55315	17.341
1899-12-31 14:57:35	0.103374	0.110082	1.75033	3.53549	9.89599	9.90166	13.7997	17.0009	25.623	29.5167	34.5238	33.0015	33.3928	33.4171	31.5791	22.3601	6.55376	17.3392
1899-12-31 14:57:36	0.10265	0.110373	1.75105	3.53639	9.89791	9.90337	13.8022	17.0048	25.6283	29.5224	34.5309	33.01	33.4007	33.4253	31.5862	22.369	6.55716	17.3457
1899-12-31 14:57:37	0.103137	0.110724	1.75181	3.53757	9.90002	9.90573	13.8064	17.0082	25.6328	29.5276	34.5391	33.0167	33.406	33.4306	31.5933	22.3751	6.56017	17.3515
1899-12-31 14:57:38	0.103084	0.110607	1.75215	3.53876	9.90229	9.90756	13.8083	17.0114	25.6376	29.5329	34.5429	33.0225	33.4129	33.4362	31.6013	22.3825	6.56344	17.3593
1899-12-31 14:57:39	0.103311	0.110476	1.75279	3.53961	9.90376	9.90913	13.8094	17.0128	25.6384	29.5321	34.5401	33.0158	33.4077	33.4291	31.5905	22.3747	6.56231	17.3527
1899-12-31 14:57:40	0.103153	0.110828	1.75354	3.54023	9.90511	9.9109	13.8117	17.0144	25.6417	29.5345	34.5413	33.0206	33.4098	33.4313	31.5935	22.3772	6.56484	17.357
1899-12-31 14:57:41	0.103191	0.110884	1.75383	3.54084	9.9066	9.91252	13.8134	17.0147	25.6413	29.5314	34.5345	33.0064	33.397	33.4193	31.5752	22.3621	6.56107	17.343
1899-12-31 14:57:42	0.103507	0.110046	1.7545	3.54223	9.90881	9.91378	13.8167	17.0187	25.6475	29.5385	34.5456	33.0186	33.4069	33.4318	31.5895	22.376	6.56692	17.3565
1899-12-31 14:57:43	0.103653	0.11035	1.755	3.54325	9.91066	9.91575	13.8182	17.021	25.6493	29.5415	34.5469	33.0197	33.4079	33.4331	31.5905	22.378	6.56868	17.3592
1899-12-31 14:57:44	0.103602	0.111365	1.75539	3.54399	9.91192	9.91881	13.8197	17.0235	25.6527	29.5445	34.55	33.0213	33.4115	33.4362	31.5942	22.3814	6.57068	17.3619
1899-12-31 14:57:45	0.103645	0.110508	1.75616	3.54487	9.91487	9.91964	13.8222	17.0261	25.6563	29.547	34.5497	33.0221	33.4105	33.4369	31.5916	22.3793	6.57161	17.3608
1899-12-31 14:57:46	0.103525	0.110887	1.7568	3.54571	9.916	9.9215	13.8238	17.0275	25.6576	29.5467	34.549	33.0183	33.4057	33.4297	31.5808	22.3691	6.56937	17.3518
1899-12-31 14:57:47	0.10367	0.110624	1.75765	3.5467	9.91779	9.92397	13.8256	17.029	25.6597	29.549	34.551	33.0171	33.4061	33.4306	31.5813	22.3688	6.57052	17.3521
1899-12-31 14:57:48	0.10387	0.11114	1.75767	3.54774	9.91977	9.92551	13.8281	17.0323	25.6634	29.5531	34.5548	33.0221	33.4077	33.4339	31.5847	22.3718	6.57272	17.3557
1899-12-31 14:57:49	0.103503	0.111742	1.75856	3.54844	9.92147	9.92667	13.8301	17.0341	25.6661	29.5554	34.5578	33.0229	33.4123	33.4365	31.5874	22.3753	6.57484	17.3592
1899-12-31 14:57:50	0.103791	0.110507	1.75898	3.54946	9.92308	9.92947	13.8336	17.0371	25.6702	29.5601	34.5661	33.029	33.4187	33.4417	31.5948	22.3831	6.57831	17.3673
1899-12-31 14:57:51	0.10388	0.111506	1.75928	3.5502	9.92516	9.93023	13.8357	17.0395	25.6739	29.5637	34.5683	33.033	33.4229	33.4442	31.5981	22.3861	6.5798	17.3692
1899-12-31 14:57:52	0.10351	0.11095	1.76009	3.55117	9.92637	9.93173	13.8373	17.0408	25.6744	29.5621	34.565	33.0266	33.4181	33.4389	31.5915	22.3839	6.58002	17.3685
1899-12-31 14:57:53	0.103918	0.111672	1.76067	3.55221	9.92852	9.93387	13.8383	17.0425	25.6768	29.5644	34.5632	33.0298	33.4205	33.4427	31.5969	22.3911	6.58299	17.3767
1899-12-31 14:57:54	0.104667	0.111333	1.7615	3.55289	9.93032	9.93471	13.8383	17.0428	25.6754	29.5604	34.5581	33.021	33.4094	33.4307	31.5829	22.3818	6.58107	17.3699
1899-12-31 14:57:55	0.10425	0.111587	1.76165	3.55381	9.93124	9.93634	13.8393	17.0436	25.6756	29.5582	34.552	33.0123	33.401	33.4238	31.573	22.3766	6.58	17.3655
1899-12-31 14:57:56	0.103837	0.111559	1.76231	3.55483	9.93293	9.93813	13.8417	17.045	25.6771	29.5584	34.5505	33.01	33.3969	33.4213	31.5693	22.3749	6.58033	17.3639
1899-12-31 14:57:57	0.10422	0.110644	1.7627	3.55575	9.93494	9.93999	13.8436	17.0466	25.6791	29.56	34.5484	33.0083	33.3957	33.421	31.5678	22.3727	6.58133	17.3654
1899-12-31 14:57:58	0.104427	0.110862	1.76341	3.55645	9.93682	9.9413	13.8457	17.0496	25.6826	29.564	34.554	33.0117	33.4011	33.4261	31.5725	22.3787	6.58412	17.3705
1899-12-31 14:57:59	0.104159	0.11192	1.76388	3.55722	9.93826	9.94225	13.8474	17.0512	25.6841	29.5637	34.5488	33.0074	33.3962	33.4194	31.5661	22.3726	6.58308	17.3647
1899-12-31 14:58:00	0.104225	0.111424	1.76449	3.55802	9.93991	9.94466	13.8497	17.0532	25.6877	29.5674	34.5588	33.0141	33.4015	33.4242	31.5703	22.3787	6.58603	17.3721
1899-12-31 14:59:16	0.108441	0.119523	1.81192	3.6368	10.111	10.1174	14.0939	17.3489	26.1146	30.0519	35.1126	33.5456	33.9654	33.9732	32.0341	22.6621	6.73196	17.5846
1899-12-31 14:59:17	0.109237	0.116241	1.81342	3.63874	10.1153	10.1205	14.1011	17.3564	26.132	30.0755	35.1382	33.5893	33.9988	34.0137	32.0769	22.6942	6.74085	17.6086
1899-12-31 14:59:17	0.109379	0.117111	1.81458	3.64055	10.1207	10.1254	14.1116	17.3691	26.1527	30.1028	35.1764	33.6323	34.0349	34.0539	32.1142	22.7127	6.74688	17.6215
1899-12-31 14:59:18	0.109325	0.116439	1.81513	3.64174	10.1236	10.129	14.1166	17.3776	26.1667	30.1205	35.2032	33.6533	34.0577	34.0783	32.1361	22.7199	6.74982	17.6246
1899-12-31 14:59:19	0.109103	0.116567	1.81608	3.64297	10.1273	10.1323	14.1251	17.3881	26.1833	30.1433	35.2337	33.6806	34.095	34.1119	32.1669	22.7387	6.75575	17.6365
1899-12-31 14:59:20	0.108929	0.116411	1.81631	3.64464	10.1309	10.1363	14.1326	17.3983	26.2004	30.1664	35.2687	33.7165	34.1303	34.1488	32.2013	22.7557	6.76099	17.6467
1899-12-31 14:59:21	0.109385	0.116507	1.81749	3.64595	10.136	10.1404	14.1412	17.411	26.2211	30.1956	35.3086	33.7631	34.1788	34.1951	32.2496	22.7873	6.77097	17.6725
1899-12-31 14:59:22	0.109628	0.117529	1.81831	3.64735	10.139	10.1445	14.1485	17.4214	26.2377	30.2174	35.3393	33.7911	34.2044	34.2275	32.2794	22.7987	6.77483	17.6776
1899-12-31 14:59:23	0.109729	0.11692	1.81941	3.64887	10.1426	10.1479	14.1555	17.43	26.2526	30.2371	35.3628	33.8165	34.2321	34.2541	32.3009	22.8076	6.77741	17.6802
1899-12-31 14:59:24	0.109343	0.117351	1.82034	3.65015	10.1472	10.1514	14.1623	17.4408	26.2687	30.259	35.3926	33.8428	34.2647	34.2854	32.3274	22.8188	6.78106	17.6862
1899-12-31 14:59:25	0.109747	0.117985	1.82063	3.65135	10.1504	10.1557	14.169	17.4508	26.2848	30.2802	35.4184	33.8704	34.2892	34.3152	32.3497	22.8313	6.78436	17.691
1899-12-31 14:59:26	0.109521	0.117346	1.82173	3.65279	10.1539	10.1593	14.1767	17.4598	26.2999	30.3019	35.448	33.9055	34.3261	34.3492	32.3835	22.8498	6.79059	17.7042
1899-12-31 14:59:27	0.109484	0.117134	1.82205	3.65407	10.1576	10.1634	14.1849	17.4702	26.3165	30.3236	35.4797	33.9387	34.3642	34.383	32.4212	22.8729	6.79794	17.7207
1899-12-31 14:59:28	0.109848	0.116955	1.82287	3.65528	10.1615	10.1659	14.1906	17.4778	26.3301	30.3411	35.5001	33.9645	34.3841	34.4083	32.4405	22.8835	6.80198	17.7286
1899-12-31 14:59:29	0.110006	0.117659	1.8236	3.65668	10.1637	10.1702	14.1955	17.4846	26.3408	30.3548	35.5199	33.9798	34.4039	34.428	32.4607	22.8942	6.80549	17.7343
1899-12-31 14:59:30	0.109888	0.117732	1.82436	3.65782	10.1666	10.1728	14.1996	17.4904	26.3486	30.3641	35.5288	33.9914	34.4137	34.4383	32.4667	22.8948	6.80656	17.7338
1899-12-31 14:59:31	0.10964	0.117535	1.82492	3.6589	10.1683	10.1734	14.2033	17.4939	26.3546	30.3708	35.5343	33.9986	34.4181	34.4426	32.4701	22.8933	6.80663	17.7317
1899-12-31 14:59:32	0.11021	0.11691	1.82543	3.65984	10.1716	10.1764	14.2072	17.4995	26.3625	30.3811	35.5498	34.0104	34.436	34.4569	32.4839	22.9024	6.81074	17.7385
1899-12-31 14:59:33	0.110239	0.117779	1.82627	3.66075	10.1745	10.1797	14.2117	17.5057	26.3707	30.3917	35.5627	34.0237	34.4497	34.4719	32.5016	22.9139	6.81516	17.7477
1899-12-31 14:59:34	0.110152	0.116926	1.8269	3.66222	10.1762	10.1825	14.2155	17.5086	26.3748	30.3958	35.5668	34.0267	34.4518	34.4759	32.4998	22.9099	6.81472	17.7435
1899-12-31 14:59:35	0.110248	0.117091	1.82749	3.66332	10.1789	10.1842	14.2184	17.5126	26.3808	30.4025	35.5753	34.0347	34.4598	34.4855	32.5081	22.9144	6.81675	17.7473
1899-12-31 14:59:36	0.110404	0.117936	1.82832	3.66438	10.1816	10.1862	14.2221	17.5173	26.3866	30.4097	35.5838	34.0423	34.4673	34.4957	32.5172	22.921	6.81949	17.752
1899-12-31 14:59:37	0.110524	0.117802	1.8289	3.66533	10.184	10.1895	14.2257	17.5226	26.3965	30.4219	35.6034	34.0643	34.4886	34.5154	32.539	22.9427	6.82618	17.7687
1899-12-31 14:59:38	0.110624	0.118804	1.82964	3.6666	10.187	10.192	14.2295	17.5271	26.4036	30.4294	35.6102	34.0721	34.4973	34.5222	32.5453	22.9437	6.82804	17.7708
1899-12-31 14:59:39	0.110726	0.118489	1.83006	3.66786	10.1891	10.194	14.2318	17.5302	26.4078	30.4342	35.614	34.0722	34.5012	34.5259	32.5428	22.9382	6.82699	17.7646
1899-12-31 14:59:40	0.110494	0.117787	1.83106	3.6693	10.1913	10.1971	14.2367	17.5355	26.4159	30.4447	35.6284	34.0927	34.5172	34.5432	32.5606	22.9501	6.83169	17.7744
1899-12-31 14:59:41	0.110589	0.117492	1.83166	3.66981	10.1939	10.1988	14.2399	17.5391	26.4216	30.4499	35.6315	34.0978	34.5236	34.5447	32.5583	22.9446	6.83051	17.7685
1899-12-31 14:59:42	0.110428	0.11839	1.83208	3.67067	10.1966	10.2021	14.2436	17.545	26.4307	30.4611	35.6486	34.1139	34.5425	34.5635	32.5805	22.96	6.83567	17.7805
1899-12-31 14:59:43	0.111072	0.1176	1.8329	3.67183	10.1985	10.2032	14.2471	17.5474	26.4338	30.4647	35.6491	34.1176	34.5425	34.5627	32.5762	22.9517	6.83426	17.7737
1899-12-31 14:59:44	0.110911	0.118751	1.83339	3.67323	10.2007	10.2048	14.2493	17.5511	26.4381	30.4696	35.6569	34.1218	34.5481	34.5684	32.5797	22.9543	6.83583	17.7755
1899-12-31 14:59:45	0.111107	0.118413	1.83374	3.67416	10.2027	10.2076	14.2524	17.5545	26.4431	30.475	35.6643	34.1282	34.5539	34.5749	32.5896	22.9654	6.84019	17.7857
1899-12-31 14:59:46	0.110823	0.118925	1.83443	3.6751	10.2039	10.2089	14.2528	17.5545	26.4414	30.4709	35.6545	34.1173	34.541	34.5633	32.5726	22.9537	6.83744	17.7759
1899-12-31 14:59:47	0.110703	0.118404	1.83518	3.67589	10.2061	10.2094	14.2532	17.5556	26.4418	30.4701	35.6493	34.1111	34.5374	34.5588	32.5681	22.9528	6.83918	17.7781
1899-12-31 14:59:48	0.110992	0.118594	1.83577	3.67675	10.2074	10.2119	14.2546	17.5558	26.4413	30.468	35.6441	34.105	34.5327	34.5538	32.5636	22.9549	6.84114	17.7808
1899-12-31 14:59:49	0.111166	0.118087	1.83634	3.67745	10.2084	10.2141	14.2542	17.5531	26.4373	30.4596	35.6297	34.0883	34.5108	34.5358	32.5442	22.9416	6.83862	17.7718
1899-12-31 14:59:50	0.110992	0.118665	1.83718	3.67811	10.2092	10.2153	14.254	17.5529	26.4344	30.454	35.6211	34.0769	34.5005	34.5239	32.5337	22.9393	6.83906	17.7711
1899-12-31 14:59:51	0.111461	0.119275	1.83751	3.67897	10.2099	10.2162	14.2541	17.5525	26.4321	30.4496	35.6131	34.0622	34.4901	34.5149	32.5248	22.9358	6.83936	17.7699
1899-12-31 14:59:52	0.111309	0.11893	1.83771	3.67968	10.2111	10.2168	14.2553	17.5519	26.4304	30.4464	35.6072	34.0532	34.4781	34.5069	32.5184	22.9344	6.84025	17.7709
1899-12-31 14:59:53	0.11145	0.119315	1.8386	3.68036	10.2126	10.2172	14.2549	17.5515	26.4284	30.4412	35.5989	34.0465	34.4697	34.4965	32.5075	22.9302	6.84031	17.7693
1899-12-31 14:59:54	0.111537	0.118694	1.83935	3.68127	10.2137	10.2184	14.2558	17.5508	26.4272	30.4382	35.5949	34.038	34.4606	34.4873	32.4996	22.9232	6.83951	17.7655
1899-12-31 14:59:55	0.111308	0.119099	1.83987	3.68213	10.2159	10.2206	14.2569	17.5521	26.4273	30.4364	35.5893	34.0322	34.4554	34.4825	32.4917	22.9221	6.83953	17.7653
1899-12-31 14:59:56	0.111532	0.119174	1.84029	3.68313	10.2167	10.2229	14.259	17.5535	26.4286	30.4368	35.5872	34.0292	34.4553	34.4796	32.4875	22.9188	6.83953	17.7637
1899-12-31 14:59:57	0.111507	0.11929	1.84081	3.68403	10.2194	10.2239	14.2607	17.5556	26.4325	30.44	35.5873	34.0282	34.4566	34.4807	32.488	22.9206	6.84059	17.7646
1899-12-31 14:59:58	0.111765	0.119211	1.84174	3.68531	10.2211	10.2267	14.2639	17.5591	26.437	30.4443	35.5918	34.0338	34.4575	34.4831	32.4909	22.9215	6.84144	17.766
1899-12-31 14:59:59	0.111822	0.118606	1.84208	3.68642	10.2238	10.228	14.2669	17.5629	26.4425	30.4503	35.5959	34.0405	34.4634	34.4899	32.4949	22.9224	6.84218	17.7661
1899-12-31 14:59:59	0.111765	0.119479	1.84278	3.68766	10.226	10.2312	14.2698	17.5674	26.4486	30.4587	35.6082	34.0479	34.4723	34.4989	32.5015	22.9264	6.84417	17.7684
1899-12-31 15:01:15	0.116697	0.123742	1.89257	3.7706	10.4032	10.4025	14.5044	17.8426	26.8416	30.8895	36.0837	34.5166	34.9603	34.9688	32.8999	23.1921	7.00865	17.9855
1899-12-31 15:01:16	0.116878	0.124257	1.8943	3.77177	10.4048	10.4086	14.5101	17.8488	26.8518	30.9026	36.1055	34.5323	34.9688	34.9858	32.9156	23.2001	7.0109	17.9869
1899-12-31 15:01:17	0.116806	0.124946	1.89515	3.77333	10.409	10.4128	14.5174	17.8587	26.8683	30.9228	36.1302	34.554	34.9955	35.0128	32.9393	23.212	7.01602	17.9934
1899-12-31 15:01:18	0.116936	0.12425	1.89582	3.77438	10.4116	10.4164	14.5229	17.8652	26.8783	30.9363	36.1459	34.5697	35.0152	35.031	32.96	23.2255	7.02077	18.0029
1899-12-31 15:01:19	0.116712	0.12421	1.8967	3.77592	10.4147	10.4193	14.5267	17.871	26.8875	30.9476	36.1602	34.586	35.0259	35.0471	32.9755	23.2329	7.02398	18.0086
1899-12-31 15:01:20	0.116845	0.124329	1.89781	3.77733	10.4181	10.4224	14.5321	17.8787	26.8985	30.9614	36.1768	34.604	35.0465	35.0672	32.9964	23.2478	7.02963	18.0197
1899-12-31 15:01:21	0.116887	0.12516	1.89836	3.77827	10.4204	10.4249	14.5367	17.8836	26.9055	30.9697	36.1859	34.6134	35.0559	35.0768	33.0032	23.2483	7.03131	18.0211
1899-12-31 15:01:22	0.117438	0.124511	1.89888	3.77934	10.4236	10.428	14.5411	17.8882	26.9141	30.9791	36.1994	34.6275	35.0684	35.0895	33.0119	23.2534	7.03428	18.0244
1899-12-31 15:01:23	0.117137	0.12493	1.89961	3.78064	10.4265	10.431	14.5448	17.894	26.9219	30.9905	36.211	34.642	35.0826	35.1023	33.0232	23.2604	7.03759	18.0305
1899-12-31 15:01:24	0.117102	0.124647	1.90024	3.78201	10.4295	10.4339	14.5492	17.8995	26.9301	30.9989	36.2263	34.6513	35.0923	35.1132	33.0314	23.2645	7.03969	18.0326
1899-12-31 15:01:25	0.11759	0.124934	1.90115	3.78296	10.4317	10.4359	14.5532	17.9038	26.9372	31.0078	36.2368	34.6651	35.1017	35.1243	33.04	23.2687	7.04209	18.0352
1899-12-31 15:01:26	0.117232	0.125073	1.90174	3.78427	10.4348	10.4394	14.5586	17.9093	26.9465	31.0198	36.2506	34.6809	35.1175	35.1391	33.0554	23.2816	7.04701	18.0453
1899-12-31 15:01:27	0.117658	0.125948	1.90231	3.78528	10.4371	10.4419	14.5615	17.9135	26.952	31.0256	36.2564	34.6871	35.1221	35.1442	33.0568	23.2805	7.04746	18.0428
1899-12-31 15:01:28	0.117627	0.124522	1.90271	3.78659	10.4402	10.4446	14.5644	17.9179	26.9577	31.0323	36.2637	34.6903	35.1276	35.15	33.0598	23.2789	7.04852	18.0421
1899-12-31 15:01:29	0.117576	0.125877	1.90385	3.78794	10.4433	10.4466	14.5687	17.9229	26.9651	31.0409	36.2733	34.7032	35.1416	35.1619	33.0711	23.2881	7.05278	18.0497
1899-12-31 15:01:30	0.117545	0.126285	1.9043	3.78926	10.4452	10.4495	14.5725	17.9273	26.9717	31.0485	36.2822	34.7102	35.1488	35.1685	33.0769	23.2907	7.05482	18.0515
1899-12-31 15:01:31	0.117422	0.124947	1.905	3.7902	10.448	10.4528	14.5763	17.9315	26.9782	31.0557	36.2887	34.7186	35.1566	35.1771	33.0841	23.2939	7.05694	18.0551
1899-12-31 15:01:32	0.117598	0.125072	1.90602	3.79156	10.4506	10.4536	14.5796	17.9356	26.984	31.0626	36.298	34.7249	35.1664	35.1842	33.0912	23.2991	7.05973	18.0589
1899-12-31 15:01:33	0.117983	0.126027	1.90677	3.7928	10.4531	10.4577	14.5851	17.942	26.9942	31.075	36.3131	34.7416	35.1888	35.2061	33.1162	23.3209	7.06744	18.0797
1899-12-31 15:01:33	0.118062	0.125923	1.90754	3.79408	10.456	10.4594	14.5877	17.9451	26.9986	31.0791	36.318	34.7437	35.1902	35.2071	33.1148	23.3169	7.06691	18.0754
1899-12-31 15:01:34	0.117833	0.124925	1.90829	3.7949	10.4582	10.4617	14.591	17.9492	27.0035	31.0835	36.3209	34.7472	35.1936	35.2105	33.1154	23.3171	7.0682	18.0746
1899-12-31 15:01:35	0.117864	0.125042	1.90904	3.79608	10.4611	10.4652	14.5943	17.9528	27.0094	31.0913	36.327	34.7523	35.1999	35.2171	33.1219	23.3234	7.07127	18.0801
1899-12-31 15:01:36	0.117859	0.125655	1.90955	3.79732	10.4633	10.4667	14.5981	17.9579	27.0158	31.0988	36.3341	34.7604	35.2096	35.2281	33.1317	23.3335	7.07584	18.0887
1899-12-31 15:01:37	0.11814	0.126569	1.91017	3.79844	10.4655	10.4689	14.6003	17.9602	27.0197	31.1014	36.339	34.7625	35.2087	35.2267	33.1283	23.3284	7.07577	18.084
1899-12-31 15:01:38	0.118144	0.126174	1.91075	3.79951	10.4682	10.4721	14.6031	17.963	27.0238	31.1051	36.3411	34.7617	35.2113	35.2291	33.1294	23.3306	7.07733	18.0856
1899-12-31 15:01:39	0.117993	0.125641	1.91162	3.80065	10.4705	10.4735	14.6061	17.9672	27.0293	31.1119	36.3508	34.7703	35.2186	35.2382	33.1378	23.3395	7.08142	18.093
1899-12-31 15:01:40	0.118098	0.126695	1.91233	3.80167	10.4728	10.477	14.6103	17.9708	27.0344	31.1174	36.3564	34.7778	35.2244	35.2439	33.1424	23.3424	7.08367	18.0955
1899-12-31 15:01:41	0.117939	0.126844	1.91281	3.80297	10.475	10.4781	14.6122	17.9732	27.0375	31.1196	36.3566	34.775	35.2246	35.2435	33.1397	23.3381	7.08324	18.0923
1899-12-31 15:01:42	0.118486	0.125949	1.91347	3.80385	10.4766	10.4812	14.6157	17.9764	27.0419	31.1232	36.3615	34.7799	35.2259	35.2463	33.1418	23.3393	7.08507	18.093
1899-12-31 15:01:43	0.118674	0.12786	1.91413	3.80491	10.4791	10.4828	14.6163	17.9784	27.0452	31.1258	36.3634	34.7779	35.225	35.2461	33.1415	23.3389	7.08574	18.0929
1899-12-31 15:01:44	0.118482	0.126181	1.91516	3.80619	10.4813	10.4853	14.6206	17.9816	27.0495	31.1321	36.3734	34.7905	35.2339	35.2549	33.1528	23.3475	7.08983	18.1011
1899-12-31 15:01:45	0.118402	0.12736	1.91593	3.807	10.483	10.4876	14.6216	17.9834	27.0514	31.1326	36.3697	34.7834	35.2305	35.2509	33.1463	23.3445	7.08937	18.0983
1899-12-31 15:01:46	0.118678	0.126243	1.91612	3.80841	10.4847	10.489	14.6233	17.985	27.0522	31.1324	36.3616	34.7816	35.2289	35.2484	33.1419	23.3423	7.08968	18.0978
1899-12-31 15:01:47	0.11892	0.127213	1.91682	3.80954	10.487	10.4911	14.6264	17.9873	27.0548	31.1342	36.3649	34.7812	35.2275	35.248	33.1421	23.3443	7.09139	18.0998
1899-12-31 15:01:48	0.118713	0.127086	1.91762	3.81027	10.489	10.493	14.6288	17.9892	27.0577	31.136	36.3679	34.7809	35.2287	35.2493	33.1415	23.3437	7.09267	18.1006
1899-12-31 15:01:49	0.118873	0.126444	1.918	3.8113	10.4902	10.4946	14.6296	17.9907	27.0593	31.136	36.3646	34.7768	35.2227	35.2446	33.1334	23.338	7.09185	18.0954
1899-12-31 15:01:50	0.118771	0.126888	1.91889	3.81238	10.4932	10.4973	14.632	17.9937	27.0635	31.1398	36.3719	34.7821	35.2268	35.2483	33.1383	23.3409	7.09405	18.0994
1899-12-31 15:01:51	0.119138	0.12727	1.91938	3.81292	10.4945	10.4984	14.6321	17.9939	27.0622	31.1362	36.362	34.7719	35.2166	35.2364	33.1207	23.327	7.08986	18.0873
1899-12-31 15:01:52	0.119436	0.127792	1.92056	3.81442	10.4976	10.5011	14.6366	17.9985	27.0695	31.1457	36.376	34.7847	35.2294	35.2514	33.1424	23.3453	7.09638	18.1032
1899-12-31 15:01:53	0.119552	0.126763	1.92109	3.81515	10.4991	10.5026	14.638	18.0003	27.0709	31.1458	36.3716	34.7834	35.2291	35.2497	33.1355	23.3415	7.09582	18.1005
1899-12-31 15:01:54	0.119584	0.127457	1.92154	3.81629	10.501	10.5041	14.6407	18.0021	27.0732	31.147	36.3722	34.7784	35.2251	35.2463	33.1301	23.3372	7.09538	18.0958
1899-12-31 15:01:55	0.119725	0.127262	1.92212	3.81739	10.5033	10.5066	14.6431	18.0043	27.0759	31.15	36.3749	34.7822	35.2268	35.2471	33.132	23.3384	7.09742	18.0979
1899-12-31 15:01:56	0.119681	0.127289	1.92303	3.81871	10.5056	10.51	14.6456	18.0078	27.0817	31.1562	36.384	34.7906	35.2352	35.2559	33.1433	23.347	7.10178	18.1078
1899-12-31 15:01:57	0.119285	0.127405	1.92336	3.82005	10.5077	10.511	14.6488	18.0112	27.0855	31.1594	36.3853	34.7944	35.2354	35.2575	33.1437	23.3472	7.10198	18.1066
1899-12-31 15:01:58	0.119502	0.126932	1.92469	3.82119	10.5104	10.515	14.6534	18.0172	27.0947	31.171	36.4048	34.8144	35.2551	35.2782	33.1682	23.3734	7.10958	18.1252
1899-12-31 15:01:59	0.119816	0.128251	1.92479	3.82228	10.5127	10.5158	14.6556	18.019	27.0966	31.1724	36.4023	34.8113	35.2504	35.274	33.1591	23.3599	7.10685	18.116
1899-12-31 15:02:00	0.119516	0.128038	1.92577	3.82335	10.5149	10.5188	14.658	18.0216	27.1009	31.1761	36.4106	34.8124	35.2519	35.2743	33.1558	23.3509	7.10586	18.1087
1899-12-31 15:03:16	0.12611	0.132616	1.98377	3.91887	10.7248	10.728	14.9546	18.3776	27.6203	31.7714	37.0952	35.4894	35.9382	35.9623	33.7441	23.7205	7.28718	18.3823
1899-12-31 15:03:17	0.125222	0.133413	1.98374	3.91969	10.7273	10.7315	14.9564	18.3805	27.6255	31.7747	37.0978	35.4916	35.9472	35.9667	33.754	23.721	7.2887	18.3838
1899-12-31 15:03:17	0.125482	0.133576	1.98493	3.92114	10.7314	10.7359	14.9605	18.3848	27.6328	31.7814	37.1027	35.4945	35.9506	35.9702	33.7525	23.7169	7.28847	18.3807
1899-12-31 15:03:18	0.125599	0.133798	1.9856	3.92296	10.7346	10.7393	14.9654	18.3914	27.6437	31.7951	37.1243	35.5122	35.9709	35.9934	33.7807	23.74	7.29582	18.3988
1899-12-31 15:03:19	0.125761	0.133261	1.98619	3.92394	10.7374	10.7413	14.9709	18.3985	27.6538	31.8077	37.1443	35.5287	35.9891	36.0132	33.8017	23.7573	7.30145	18.4116
1899-12-31 15:03:20	0.125752	0.133398	1.98723	3.92564	10.7408	10.7443	14.975	18.403	27.6613	31.8152	37.1491	35.5363	35.9982	36.0215	33.8063	23.7599	7.30277	18.4121
1899-12-31 15:03:21	0.125621	0.132889	1.98783	3.927	10.7432	10.7477	14.9781	18.407	27.6666	31.8218	37.156	35.5414	36.0024	36.024	33.804	23.7507	7.30121	18.405
1899-12-31 15:03:22	0.125902	0.133784	1.98865	3.92805	10.7472	10.7507	14.9848	18.4156	27.6803	31.8402	37.1825	35.571	36.0345	36.0549	33.8374	23.776	7.30932	18.4241
1899-12-31 15:03:23	0.126148	0.133309	1.98981	3.92968	10.7508	10.7539	14.9907	18.4237	27.6936	31.8572	37.2045	35.5973	36.0602	36.0792	33.8603	23.7934	7.31451	18.4361
1899-12-31 15:03:24	0.125757	0.134419	1.99044	3.93112	10.7535	10.7572	14.995	18.4283	27.701	31.864	37.2105	35.6027	36.0661	36.0824	33.8554	23.7797	7.31132	18.4222
1899-12-31 15:03:25	0.125929	0.133763	1.9911	3.93269	10.7563	10.7601	14.9999	18.4351	27.7106	31.8772	37.2264	35.6203	36.076	36.096	33.8649	23.7781	7.31191	18.4186
1899-12-31 15:03:26	0.126022	0.133685	1.99205	3.93406	10.7606	10.7641	15.0063	18.4438	27.7248	31.8954	37.2533	35.6501	36.1053	36.1238	33.8935	23.7993	7.31841	18.4343
1899-12-31 15:03:27	0.126262	0.134519	1.99264	3.93497	10.7637	10.7669	15.0119	18.4504	27.7355	31.908	37.2684	35.6613	36.1193	36.1389	33.9069	23.8048	7.32067	18.437
1899-12-31 15:03:28	0.125954	0.133473	1.99357	3.93652	10.7661	10.7709	15.0161	18.4563	27.7441	31.9185	37.2798	35.6713	36.1296	36.1507	33.917	23.8086	7.3225	18.4393
1899-12-31 15:03:29	0.12673	0.13522	1.99456	3.93802	10.7695	10.7734	15.0217	18.4644	27.7558	31.9339	37.297	35.6939	36.1533	36.1735	33.94	23.8262	7.3291	18.4556
1899-12-31 15:03:30	0.126033	0.13462	1.99519	3.93953	10.7729	10.7763	15.0259	18.4688	27.7638	31.9422	37.3074	35.7001	36.1612	36.1828	33.9457	23.829	7.33133	18.4579
1899-12-31 15:03:31	0.12608	0.134006	1.9956	3.94052	10.7752	10.7791	15.0294	18.4728	27.7689	31.9485	37.3123	35.707	36.1663	36.1873	33.9479	23.8288	7.3324	18.457
1899-12-31 15:03:32	0.126535	0.133467	1.99644	3.94148	10.7775	10.7822	15.0331	18.4769	27.7756	31.9555	37.3187	35.715	36.1753	36.1968	33.9558	23.8346	7.33518	18.4617
1899-12-31 15:03:33	0.12661	0.134804	1.99712	3.94267	10.7804	10.784	15.0366	18.4805	27.781	31.9608	37.3263	35.7201	36.1795	36.2018	33.9584	23.8351	7.33678	18.4633
1899-12-31 15:03:34	0.126566	0.135334	1.99773	3.94369	10.7816	10.7862	15.0369	18.4808	27.7809	31.9584	37.3201	35.708	36.1657	36.1895	33.94	23.8148	7.33081	18.4433
1899-12-31 15:03:35	0.126469	0.134882	1.99884	3.94516	10.7849	10.789	15.0414	18.4876	27.7916	31.9731	37.3416	35.7309	36.1878	36.2148	33.9692	23.8415	7.33979	18.4667
1899-12-31 15:03:36	0.127163	0.134409	1.99951	3.94595	10.7872	10.7904	15.0453	18.4918	27.7968	31.9797	37.348	35.736	36.1947	36.2218	33.9752	23.8451	7.34201	18.469
1899-12-31 15:03:37	0.126834	0.13416	2.00069	3.94756	10.7891	10.7943	15.0478	18.4949	27.8016	31.9824	37.3519	35.7368	36.1978	36.2228	33.9768	23.8461	7.34378	18.47
1899-12-31 15:03:38	0.126522	0.135202	2.00057	3.94882	10.7915	10.7938	15.0497	18.4971	27.8056	31.9871	37.3598	35.7435	36.2012	36.2279	33.9803	23.8494	7.34576	18.4735
1899-12-31 15:03:39	0.126843	0.135276	2.00127	3.94972	10.7933	10.797	15.0517	18.4998	27.8089	31.9895	37.3589	35.7435	36.2043	36.2277	33.9793	23.8493	7.34697	18.4739
1899-12-31 15:03:40	0.127122	0.134971	2.00201	3.95064	10.7964	10.7996	15.0552	18.5034	27.8135	31.9948	37.3612	35.7466	36.21	36.2328	33.9843	23.8509	7.34908	18.477
1899-12-31 15:03:41	0.127068	0.134762	2.00301	3.95199	10.7982	10.8032	15.058	18.5059	27.8179	31.9984	37.3673	35.7525	36.2096	36.235	33.9866	23.852	7.35027	18.4766
1899-12-31 15:03:42	0.126961	0.135515	2.00339	3.95325	10.8013	10.8055	15.0627	18.5117	27.8265	32.0096	37.3847	35.7691	36.2278	36.2518	34.0039	23.8639	7.35552	18.4886
1899-12-31 15:03:43	0.127136	0.13564	2.00431	3.95478	10.8043	10.8077	15.0658	18.5167	27.8344	32.0192	37.3966	35.7788	36.2395	36.2629	34.0154	23.8685	7.35764	18.4909
1899-12-31 15:03:44	0.127605	0.13588	2.00492	3.95582	10.8071	10.8097	15.071	18.5234	27.8449	32.0321	37.4113	35.7943	36.2573	36.2793	34.0314	23.8749	7.36029	18.4952
1899-12-31 15:03:45	0.127516	0.135281	2.00621	3.9573	10.8111	10.815	15.0776	18.532	27.8598	32.0515	37.4402	35.8281	36.288	36.3082	34.059	23.895	7.36656	18.5087
1899-12-31 15:03:46	0.127258	0.136402	2.00656	3.9587	10.8145	10.8171	15.0819	18.5382	27.8692	32.0618	37.4518	35.8395	36.2993	36.3166	34.062	23.888	7.36485	18.4997
1899-12-31 15:03:47	0.127252	0.135909	2.00765	3.96028	10.8177	10.8206	15.088	18.5469	27.8843	32.0806	37.4787	35.8672	36.3289	36.3437	34.0877	23.9037	7.37075	18.512
1899-12-31 15:03:48	0.127654	0.135652	2.00863	3.96185	10.8217	10.8255	15.0951	18.5555	27.8963	32.0973	37.4961	35.8871	36.3479	36.3635	34.104	23.907	7.37261	18.5117
1899-12-31 15:03:49	0.127421	0.136176	2.00965	3.96347	10.8256	10.8283	15.1039	18.5671	27.9162	32.1242	37.5305	35.927	36.3944	36.4075	34.1503	23.9402	7.38351	18.5367
1899-12-31 15:03:50	0.127604	0.135512	2.01069	3.96499	10.83	10.8346	15.1117	18.5778	27.9349	32.1494	37.5656	35.9601	36.4292	36.4457	34.1867	23.9656	7.39158	18.5552
1899-12-31 15:03:51	0.127837	0.136052	2.01131	3.96702	10.8345	10.8379	15.1186	18.5895	27.9534	32.1742	37.5972	35.9957	36.467	36.4802	34.2248	23.9883	7.39851	18.5697
1899-12-31 15:03:52	0.127763	0.136409	2.01212	3.96826	10.8383	10.8419	15.1257	18.5985	27.9684	32.1929	37.6196	36.0199	36.4909	36.502	34.2392	23.9897	7.3991	18.567
1899-12-31 15:03:53	0.127789	0.137206	2.01302	3.96987	10.8429	10.8464	15.1336	18.6091	27.9874	32.2174	37.6487	36.0527	36.5277	36.538	34.2729	24.007	7.40542	18.5786
1899-12-31 15:03:54	0.128115	0.136464	2.01402	3.97165	10.8475	10.8511	15.1415	18.6213	28.0067	32.2442	37.6866	36.0905	36.5668	36.5753	34.3084	24.0284	7.41295	18.594
1899-12-31 15:03:55	0.128258	0.136032	2.01469	3.97325	10.8512	10.8548	15.1486	18.6308	28.0224	32.2641	37.7121	36.1124	36.5952	36.6043	34.3365	24.0451	7.41872	18.6053
1899-12-31 15:03:56	0.128254	0.136875	2.01547	3.97473	10.8545	10.8579	15.1532	18.6375	28.0347	32.2778	37.7288	36.1307	36.6086	36.6223	34.3521	24.0524	7.42141	18.6086
1899-12-31 15:03:57	0.127982	0.136049	2.0163	3.97596	10.8568	10.8615	15.1589	18.6434	28.0435	32.2891	37.7425	36.1446	36.6169	36.6338	34.3589	24.0503	7.42164	18.6064
1899-12-31 15:03:58	0.128422	0.13563	2.01743	3.97718	10.8607	10.8642	15.1631	18.6502	28.0527	32.3027	37.7551	36.1545	36.6311	36.6478	34.3727	24.0571	7.42445	18.6115
1899-12-31 15:03:59	0.12834	0.137295	2.01784	3.97862	10.8637	10.8671	15.1672	18.6567	28.0633	32.3152	37.7732	36.1687	36.6437	36.6632	34.3834	24.0629	7.42674	18.6148
1899-12-31 15:03:59	0.128442	0.136905	2.01898	3.97948	10.8669	10.8694	15.1717	18.6622	28.073	32.3268	37.7891	36.1869	36.6594	36.6781	34.3986	24.0694	7.42929	18.6186
1899-12-31 15:05:15	0.133443	0.143664	2.07749	4.08347	11.0899	11.0931	15.4672	19.0783	28.7458	33.1515	38.7952	37.1971	37.6349	37.6716	35.3473	24.6411	7.65925	19.026
1899-12-31 15:05:16	0.133768	0.142335	2.07828	4.08406	11.0917	11.0941	15.4668	19.0784	28.7467	33.1498	38.7876	37.1921	37.6348	37.668	35.3441	24.6438	7.66142	19.0302
1899-12-31 15:05:17	0.133765	0.141912	2.07934	4.08562	11.0937	11.096	15.4669	19.0786	28.7461	33.1473	38.7837	37.1878	37.6259	37.6603	35.3416	24.6482	7.6641	19.0364
1899-12-31 15:05:18	0.133942	0.141635	2.07949	4.08638	11.0944	11.0963	15.4652	19.0765	28.7419	33.1395	38.7691	37.1713	37.6093	37.6417	35.3232	24.638	7.66148	19.0287
1899-12-31 15:05:19	0.133802	0.142185	2.08022	4.08757	11.0961	11.0986	15.4658	19.0766	28.741	33.1368	38.7615	37.1632	37.6018	37.6342	35.3196	24.6402	7.66306	19.0321
1899-12-31 15:05:20	0.133924	0.14266	2.0813	4.08888	11.0976	11.1007	15.4662	19.0764	28.7409	33.1346	38.7567	37.1594	37.5958	37.6294	35.3156	24.6399	7.66439	19.0344
1899-12-31 15:05:21	0.134124	0.142103	2.08165	4.0896	11.099	11.1011	15.4656	19.0763	28.7401	33.1313	38.7485	37.1503	37.5886	37.6212	35.3076	24.6383	7.66547	19.0348
1899-12-31 15:05:22	0.134594	0.142713	2.082	4.09078	11.1012	11.1017	15.4662	19.0774	28.741	33.131	38.7472	37.147	37.5845	37.6164	35.3042	24.6396	7.66706	19.0359
1899-12-31 15:05:23	0.134511	0.14222	2.0835	4.09186	11.103	11.1065	15.4694	19.0807	28.7462	33.1383	38.7542	37.1548	37.5921	37.6254	35.3183	24.6531	7.67269	19.0469
1899-12-31 15:05:24	0.134088	0.14363	2.08362	4.09338	11.1054	11.1079	15.4711	19.0827	28.7493	33.1409	38.7559	37.1567	37.5913	37.6256	35.32	24.6548	7.67407	19.049
1899-12-31 15:05:25	0.134446	0.142284	2.08448	4.09453	11.1078	11.1112	15.474	19.0875	28.7568	33.1504	38.7701	37.1678	37.606	37.6383	35.3333	24.6679	7.67863	19.0607
1899-12-31 15:05:26	0.134522	0.143045	2.08525	4.09616	11.1105	11.1145	15.4765	19.0924	28.7645	33.1587	38.7796	37.1795	37.6128	37.6474	35.3412	24.6737	7.68147	19.066
1899-12-31 15:05:27	0.134685	0.142785	2.08591	4.09723	11.1135	11.1155	15.4788	19.0958	28.77	33.1651	38.7861	37.1815	37.6164	37.6523	35.3455	24.6739	7.68232	19.0664
1899-12-31 15:05:28	0.134545	0.142504	2.08674	4.09864	11.1162	11.1183	15.4825	19.1011	28.7783	33.1758	38.7976	37.1952	37.6284	37.6645	35.3567	24.6831	7.68598	19.0729
1899-12-31 15:05:29	0.13468	0.142967	2.08762	4.10012	11.1202	11.121	15.4877	19.1085	28.7908	33.192	38.8175	37.2213	37.6534	37.6891	35.3866	24.7034	7.69313	19.0893
1899-12-31 15:05:30	0.135148	0.144027	2.0887	4.10163	11.1226	11.1257	15.492	19.1134	28.7994	33.2015	38.8275	37.2337	37.6591	37.6954	35.3895	24.7011	7.6926	19.0862
1899-12-31 15:05:31	0.134611	0.142699	2.08896	4.10327	11.1266	11.1285	15.4973	19.1214	28.8125	33.2179	38.8467	37.253	37.6811	37.716	35.4073	24.7134	7.69658	19.0941
1899-12-31 15:05:32	0.134776	0.142509	2.08996	4.10392	11.1292	11.1326	15.5012	19.1268	28.8209	33.2282	38.8617	37.2646	37.6909	37.7248	35.4126	24.7122	7.69583	19.0902
1899-12-31 15:05:32	0.135086	0.143821	2.09113	4.10569	11.1328	11.1348	15.5057	19.1341	28.8327	33.2433	38.8791	37.2867	37.7086	37.7437	35.4284	24.7189	7.69823	19.0956
1899-12-31 15:05:33	0.135085	0.143022	2.09175	4.10745	11.136	11.1389	15.5115	19.1424	28.8453	33.2604	38.9031	37.3128	37.7316	37.7691	35.457	24.739	7.70441	19.1092
1899-12-31 15:05:34	0.135131	0.144062	2.09268	4.10888	11.14	11.1422	15.5179	19.15	28.8599	33.278	38.9241	37.3372	37.7596	37.7936	35.483	24.7582	7.71073	19.1247
1899-12-31 15:05:35	0.135313	0.143535	2.09353	4.1106	11.1433	11.1454	15.52	19.1544	28.8668	33.2856	38.9301	37.342	37.7658	37.8002	35.4841	24.756	7.71048	19.1217
1899-12-31 15:05:36	0.135372	0.14371	2.09408	4.11129	11.1457	11.1489	15.5224	19.1581	28.872	33.2909	38.9341	37.3454	37.7638	37.799	35.4795	24.7455	7.70864	19.114
1899-12-31 15:05:37	0.135353	0.144008	2.09516	4.11347	11.1494	11.1519	15.5287	19.167	28.8868	33.3114	38.9623	37.3676	37.7961	37.8286	35.5132	24.7736	7.71756	19.134
1899-12-31 15:05:38	0.135186	0.144117	2.09536	4.11476	11.1521	11.1539	15.532	19.1718	28.8946	33.3206	38.9747	37.375	37.8015	37.8354	35.5207	24.7766	7.71878	19.1351
1899-12-31 15:05:39	0.135627	0.144187	2.09641	4.11633	11.1551	11.158	15.5358	19.1775	28.9045	33.3322	38.9907	37.3924	37.8169	37.8518	35.5403	24.7934	7.72376	19.1482
1899-12-31 15:05:40	0.135504	0.142509	2.09703	4.117	11.1567	11.1595	15.5358	19.1782	28.9044	33.3295	38.9825	37.3803	37.8056	37.8394	35.5188	24.7722	7.71795	19.1302
1899-12-31 15:05:41	0.135736	0.144055	2.09766	4.11826	11.1601	11.1618	15.5409	19.1846	28.915	33.3445	39.0061	37.407	37.8259	37.8647	35.553	24.8059	7.72829	19.1587
1899-12-31 15:05:42	0.135859	0.142988	2.09883	4.12	11.1609	11.1646	15.5408	19.1853	28.9153	33.3426	38.9996	37.3999	37.8186	37.8574	35.5444	24.7982	7.72678	19.1537
1899-12-31 15:05:43	0.136024	0.144392	2.09916	4.12101	11.1629	11.1652	15.5413	19.1861	28.9161	33.3425	38.9971	37.3961	37.8147	37.8507	35.5382	24.795	7.72604	19.15
1899-12-31 15:05:44	0.135702	0.143808	2.10005	4.12174	11.1641	11.1667	15.5415	19.1843	28.9121	33.3346	38.9792	37.3776	37.7985	37.8328	35.5157	24.7785	7.72171	19.1377
1899-12-31 15:05:45	0.135712	0.144726	2.10057	4.12275	11.1663	11.1688	15.5419	19.1858	28.9145	33.3361	38.9819	37.3789	37.7975	37.8347	35.5205	24.7867	7.72525	19.1468
1899-12-31 15:05:46	0.13596	0.144536	2.10155	4.1243	11.1677	11.1704	15.543	19.1866	28.9156	33.337	38.9794	37.3787	37.7968	37.8315	35.5223	24.7914	7.7278	19.152
1899-12-31 15:05:47	0.136102	0.144416	2.10185	4.12535	11.1699	11.1724	15.5422	19.1879	28.9176	33.338	38.9799	37.3775	37.7945	37.8297	35.5224	24.7957	7.73049	19.1568
1899-12-31 15:05:48	0.136041	0.144117	2.10276	4.12639	11.1721	11.1748	15.5453	19.1906	28.922	33.3435	38.9889	37.3816	37.7995	37.8364	35.5324	24.8069	7.73532	19.1667
1899-12-31 15:05:49	0.136394	0.144261	2.10344	4.12785	11.1739	11.1774	15.5462	19.1936	28.9262	33.3469	38.9912	37.3865	37.8014	37.8386	35.5387	24.816	7.73887	19.1749
1899-12-31 15:05:50	0.136662	0.145036	2.10385	4.12892	11.1754	11.1789	15.5464	19.1922	28.9239	33.3422	38.9766	37.3751	37.7879	37.8232	35.5191	24.7998	7.7343	19.161
1899-12-31 15:05:51	0.136456	0.145147	2.10477	4.12997	11.1777	11.1795	15.5453	19.1913	28.9228	33.3389	38.9679	37.3631	37.7718	37.8097	35.5002	24.7841	7.72995	19.1487
1899-12-31 15:05:52	0.136402	0.144815	2.10555	4.13125	11.1797	11.182	15.5491	19.1967	28.9293	33.3466	38.9772	37.372	37.7807	37.8194	35.5114	24.7948	7.73346	19.1576
1899-12-31 15:05:53	0.136918	0.144185	2.10627	4.1325	11.1824	11.1851	15.5513	19.1992	28.9346	33.3527	38.9841	37.3776	37.7848	37.8215	35.5132	24.7945	7.73356	19.158
1899-12-31 15:05:54	0.136754	0.144593	2.10707	4.13336	11.1849	11.187	15.5534	19.2023	28.9393	33.3565	38.9857	37.3766	37.7851	37.822	35.5107	24.7915	7.73256	19.155
1899-12-31 15:05:55	0.136448	0.145127	2.10749	4.13539	11.1873	11.1884	15.5564	19.2066	28.9459	33.3646	38.9934	37.3864	37.791	37.8295	35.5173	24.7944	7.73341	19.1572
1899-12-31 15:05:56	0.136925	0.144482	2.1083	4.13636	11.1896	11.193	15.5586	19.2112	28.9529	33.3734	39.0039	37.3977	37.802	37.8385	35.527	24.8018	7.73541	19.1631
1899-12-31 15:05:57	0.136886	0.144625	2.10911	4.13749	11.1917	11.1953	15.5605	19.2133	28.9561	33.3752	39.0029	37.3954	37.798	37.8358	35.5223	24.7965	7.73441	19.159
1899-12-31 15:05:58	0.13673	0.145236	2.10978	4.13909	11.1944	11.197	15.5622	19.2158	28.9613	33.3809	39.011	37.4028	37.8006	37.8414	35.5308	24.8064	7.73761	19.1661
1899-12-31 15:05:59	0.137347	0.145628	2.11061	4.14006	11.1959	11.2003	15.5632	19.2175	28.9635	33.3824	39.01	37.3996	37.7988	37.839	35.5248	24.802	7.73714	19.163
1899-12-31 15:06:00	0.136977	0.145476	2.11109	4.14105	11.1983	11.2001	15.564	19.2194	28.965	33.3833	39.0074	37.3956	37.797	37.8368	35.5246	24.8045	7.73887	19.1669
1899-12-31 15:07:15	0.142871	0.147157	2.17083	4.2468	11.4084	11.4125	15.7966	19.556	29.4553	34.0199	39.722	38.1106	38.4439	38.5029	36.212	25.3219	7.94105	19.5703
1899-12-31 15:07:16	0.143385	0.150791	2.17217	4.248	11.412	11.4162	15.8012	19.5618	29.4717	34.0298	39.7288	38.1226	38.4563	38.5142	36.2232	25.3315	7.94283	19.5715
1899-12-31 15:07:17	0.143533	0.150671	2.17311	4.25015	11.4174	11.4205	15.8074	19.5722	29.4866	34.0506	39.7534	38.1482	38.4837	38.5387	36.2447	25.3438	7.94789	19.5811
1899-12-31 15:07:18	0.143429	0.150332	2.17371	4.25178	11.421	11.4239	15.8126	19.5788	29.5021	34.0659	39.7694	38.1678	38.5008	38.5565	36.2618	25.3548	7.95139	19.5887
1899-12-31 15:07:19	0.143298	0.151053	2.17494	4.25339	11.4244	11.4287	15.817	19.5848	29.513	34.0782	39.7846	38.1808	38.5152	38.5715	36.2767	25.3621	7.9543	19.5942
1899-12-31 15:07:20	0.143106	0.151016	2.17588	4.2549	11.4268	11.4313	15.8198	19.5895	29.52	34.0871	39.7936	38.1922	38.5222	38.5798	36.2848	25.3658	7.95568	19.5953
1899-12-31 15:07:21	0.143453	0.15168	2.17655	4.25636	11.4289	11.4324	15.8199	19.5906	29.5207	34.0855	39.7879	38.1819	38.5125	38.5684	36.2667	25.351	7.9514	19.5828
1899-12-31 15:07:22	0.14358	0.150533	2.17786	4.25768	11.432	11.4359	15.8243	19.5967	29.5315	34.0989	39.8077	38.2023	38.5313	38.5882	36.2934	25.3746	7.95902	19.6027
1899-12-31 15:07:23	0.143571	0.150971	2.17816	4.25867	11.4336	11.4378	15.8244	19.5971	29.5336	34.0971	39.8013	38.1966	38.5247	38.5802	36.286	25.3707	7.9581	19.5995
1899-12-31 15:07:24	0.143712	0.150885	2.17893	4.25982	11.4356	11.4403	15.8273	19.5998	29.5398	34.1012	39.804	38.1995	38.5294	38.584	36.2923	25.3787	7.96167	19.6076
1899-12-31 15:07:25	0.144152	0.151445	2.17932	4.26126	11.4378	11.4406	15.828	19.6011	29.5371	34.1029	39.8104	38.2012	38.5273	38.5847	36.2967	25.3867	7.96461	19.6146
1899-12-31 15:07:26	0.143973	0.15115	2.1805	4.26267	11.4396	11.4447	15.8308	19.6038	29.5432	34.1071	39.8116	38.2079	38.5366	38.5914	36.304	25.3962	7.96858	19.6248
1899-12-31 15:07:27	0.143903	0.151924	2.18115	4.26405	11.4426	11.4467	15.8322	19.607	29.5462	34.1116	39.8213	38.2154	38.5402	38.5974	36.3133	25.4077	7.97251	19.6351
1899-12-31 15:07:28	0.144085	0.151313	2.18173	4.26472	11.4442	11.4471	15.8325	19.6081	29.5535	34.1121	39.8195	38.2136	38.5349	38.5937	36.3109	25.408	7.97263	19.6352
1899-12-31 15:07:29	0.144422	0.152099	2.18228	4.26634	11.4466	11.4511	15.8354	19.6108	29.5555	34.1159	39.8229	38.216	38.5372	38.596	36.3128	25.4104	7.97418	19.6382
1899-12-31 15:07:30	0.144389	0.151851	2.18341	4.26756	11.4492	11.4543	15.8363	19.6143	29.5602	34.1202	39.826	38.219	38.5404	38.5988	36.316	25.4144	7.97573	19.6404
1899-12-31 15:07:31	0.144574	0.15125	2.18425	4.26892	11.4518	11.4563	15.8394	19.616	29.5607	34.1246	39.8314	38.2194	38.54	38.598	36.3154	25.4127	7.97592	19.6389
1899-12-31 15:07:32	0.144213	0.152118	2.18481	4.27058	11.4542	11.4585	15.8425	19.6206	29.5724	34.1319	39.8383	38.2253	38.5452	38.6052	36.3207	25.417	7.97723	19.6425
1899-12-31 15:07:33	0.144426	0.151322	2.18547	4.27153	11.4565	11.4605	15.8443	19.6231	29.5742	34.1369	39.8417	38.2273	38.5468	38.6047	36.319	25.416	7.97715	19.6411
1899-12-31 15:07:34	0.14482	0.152885	2.1862	4.2729	11.4592	11.4636	15.8471	19.6276	29.579	34.145	39.8463	38.2332	38.5538	38.6131	36.3276	25.4227	7.97948	19.6459
1899-12-31 15:07:35	0.144801	0.152031	2.18675	4.27447	11.4626	11.4669	15.8508	19.6329	29.5912	34.1544	39.8611	38.2416	38.5625	38.6231	36.3383	25.4312	7.98343	19.6525
1899-12-31 15:07:36	0.145022	0.15229	2.18762	4.27601	11.4655	11.4695	15.8539	19.6374	29.597	34.1641	39.8695	38.2554	38.5687	38.6331	36.3483	25.4396	7.98607	19.6586
1899-12-31 15:07:37	0.145016	0.151657	2.18861	4.27746	11.468	11.4727	15.8576	19.6428	29.6102	34.1741	39.8793	38.2672	38.5786	38.6445	36.3616	25.4495	7.98906	19.6682
1899-12-31 15:07:38	0.144729	0.152454	2.18953	4.27868	11.4714	11.4744	15.8599	19.6463	29.6143	34.1811	39.8845	38.2738	38.5855	38.6507	36.3692	25.4562	7.99062	19.6734
1899-12-31 15:07:39	0.145118	0.153633	2.19025	4.28023	11.4742	11.4773	15.8629	19.6511	29.6217	34.1903	39.8967	38.2881	38.5927	38.6628	36.3833	25.4712	7.99481	19.6851
1899-12-31 15:07:40	0.145474	0.15195	2.19123	4.28172	11.4762	11.4801	15.8663	19.6556	29.6244	34.1973	39.9051	38.2926	38.6013	38.6688	36.3926	25.4802	7.99788	19.6916
1899-12-31 15:07:41	0.145375	0.153525	2.19157	4.28332	11.4786	11.4834	15.8669	19.6574	29.6285	34.2003	39.9066	38.2946	38.5977	38.6677	36.3883	25.4759	7.9968	19.6879
1899-12-31 15:07:42	0.14531	0.152013	2.19266	4.28445	11.4815	11.4867	15.8704	19.6617	29.6357	34.2067	39.9099	38.3021	38.602	38.6734	36.3957	25.4832	7.99821	19.6933
1899-12-31 15:07:43	0.145031	0.151695	2.19361	4.28548	11.4837	11.4867	15.8711	19.6632	29.6417	34.2097	39.9134	38.3005	38.5992	38.6701	36.391	25.479	7.99886	19.6906
1899-12-31 15:07:44	0.145475	0.152629	2.19419	4.28694	11.4866	11.4913	15.8736	19.6665	29.6449	34.2135	39.9161	38.3004	38.6015	38.672	36.3913	25.4798	7.99914	19.6921
1899-12-31 15:07:45	0.145578	0.152628	2.19513	4.28853	11.4883	11.4936	15.8772	19.6694	29.6514	34.2188	39.9187	38.306	38.6029	38.6747	36.395	25.4836	8.00237	19.6962
1899-12-31 15:07:46	0.145732	0.152465	2.19572	4.28973	11.4907	11.4949	15.8781	19.6724	29.6557	34.2242	39.9254	38.3084	38.6072	38.6791	36.401	25.4911	8.00425	19.7013
1899-12-31 15:07:47	0.145302	0.152635	2.19666	4.29036	11.4933	11.4975	15.8793	19.6741	29.6584	34.2246	39.9246	38.306	38.6027	38.6734	36.3961	25.4874	8.0036	19.6981
1899-12-31 15:07:48	0.145652	0.15236	2.19725	4.29241	11.4961	11.5003	15.8831	19.6791	29.6652	34.2353	39.9364	38.3212	38.6182	38.6896	36.4154	25.5074	8.01146	19.7166
1899-12-31 15:07:49	0.145829	0.152953	2.19809	4.29351	11.4979	11.5022	15.8835	19.6803	29.6679	34.2371	39.9345	38.318	38.6117	38.6861	36.4095	25.5035	8.01047	19.7129
1899-12-31 15:07:50	0.145835	0.152942	2.19861	4.29478	11.5002	11.5042	15.885	19.6835	29.6714	34.2398	39.9383	38.3197	38.6171	38.6868	36.4121	25.5065	8.01257	19.7154
1899-12-31 15:07:51	0.145933	0.153167	2.19915	4.29618	11.5023	11.5081	15.8868	19.685	29.674	34.2419	39.9349	38.318	38.6125	38.6842	36.4088	25.5036	8.01264	19.7133
1899-12-31 15:07:52	0.145952	0.153029	2.20005	4.2972	11.505	11.5086	15.8888	19.6882	29.6785	34.2475	39.9435	38.3236	38.6161	38.6883	36.4142	25.5091	8.0148	19.7178
1899-12-31 15:07:53	0.146197	0.153131	2.20089	4.29874	11.5082	11.5133	15.8918	19.6935	29.6882	34.2585	39.9561	38.3388	38.6339	38.7047	36.4328	25.5249	8.02139	19.7305
1899-12-31 15:07:54	0.146358	0.152829	2.20149	4.30003	11.5112	11.5157	15.8951	19.697	29.689	34.2649	39.9647	38.3457	38.6358	38.7083	36.4347	25.5243	8.02183	19.7299
1899-12-31 15:07:55	0.146322	0.153863	2.20242	4.30182	11.5143	11.5205	15.8992	19.7037	29.7	34.2802	39.9778	38.368	38.6605	38.7288	36.458	25.5422	8.02872	19.7447
1899-12-31 15:07:56	0.146242	0.152529	2.20337	4.30323	11.5173	11.5216	15.9045	19.7093	29.7097	34.2913	39.9934	38.3797	38.6718	38.7399	36.4666	25.5458	8.03092	19.7454
1899-12-31 15:07:57	0.146203	0.152679	2.20438	4.30437	11.5202	11.526	15.9085	19.7174	29.7211	34.308	40.013	38.4047	38.6933	38.7618	36.489	25.5584	8.03607	19.7552
1899-12-31 15:07:57	0.146326	0.15412	2.20468	4.30629	11.5243	11.5287	15.9139	19.723	29.7303	34.32	40.0275	38.4204	38.7017	38.773	36.4963	25.5594	8.03699	19.7533
1899-12-31 15:07:58	0.146406	0.154042	2.20632	4.30819	11.5289	11.5348	15.9225	19.737	29.7534	34.3498	40.0722	38.4634	38.7525	38.8208	36.548	25.5984	8.05048	19.7835
1899-12-31 15:07:59	0.146772	0.153539	2.20735	4.3099	11.534	11.5387	15.9287	19.7464	29.7688	34.373	40.0951	38.4944	38.7852	38.8508	36.5807	25.6208	8.05788	19.7998
1899-12-31 15:09:15	0.152237	0.156731	2.2557	4.39452	11.6377	11.6486	15.8895	19.6839	29.6267	34.0343	39.44	37.7595	37.9531	38.0349	35.8968	25.4535	8.07993	19.7881
1899-12-31 15:09:16	0.152711	0.15851	2.25796	4.39619	11.645	11.6529	15.8924	19.6912	29.6393	34.0534	39.4573	37.7954	37.9796	38.0658	35.9318	25.4865	8.08742	19.8101
1899-12-31 15:09:17	0.152546	0.158676	2.25971	4.39867	11.6503	11.6597	15.9004	19.7025	29.6609	34.0755	39.4853	37.8185	38.0006	38.0901	35.951	25.4948	8.09051	19.8152
1899-12-31 15:09:18	0.152532	0.158587	2.2606	4.40059	11.6559	11.6637	15.9094	19.7154	29.6781	34.1051	39.5268	37.8649	38.0379	38.1331	35.9966	25.5261	8.0974	19.8379
1899-12-31 15:09:19	0.152789	0.158338	2.26146	4.40251	11.6612	11.6694	15.9185	19.7291	29.6973	34.1352	39.57	37.9067	38.0775	38.1748	36.0401	25.5523	8.10497	19.858
1899-12-31 15:09:20	0.152854	0.159467	2.26287	4.40527	11.6664	11.6762	15.9293	19.7429	29.7154	34.1665	39.6099	37.9482	38.1207	38.2164	36.0792	25.5748	8.11213	19.8718
1899-12-31 15:09:21	0.153091	0.159133	2.26408	4.40702	11.6717	11.6812	15.938	19.7555	29.7407	34.192	39.6394	37.9755	38.1492	38.2443	36.0951	25.5719	8.11017	19.8645
1899-12-31 15:09:22	0.153253	0.158654	2.26486	4.40942	11.6789	11.6879	15.9503	19.7747	29.7707	34.2352	39.6955	38.0329	38.2139	38.3029	36.1495	25.6012	8.12032	19.8826
1899-12-31 15:09:23	0.153492	0.159577	2.26642	4.41234	11.6862	11.6964	15.966	19.797	29.8006	34.2876	39.7687	38.1134	38.2911	38.3785	36.2258	25.6487	8.13517	19.9149
1899-12-31 15:09:24	0.153092	0.158944	2.26786	4.41478	11.6945	11.7045	15.9812	19.8203	29.8435	34.3386	39.8425	38.1863	38.3641	38.4529	36.2968	25.6904	8.14804	19.9432
1899-12-31 15:09:25	0.153887	0.15867	2.26914	4.41736	11.7022	11.7131	15.9959	19.8418	29.8838	34.3886	39.9061	38.254	38.4369	38.5252	36.3631	25.7257	8.15912	19.9666
1899-12-31 15:09:26	0.153737	0.159434	2.27053	4.41962	11.7084	11.72	16.0096	19.8612	29.9158	34.4324	39.9637	38.3107	38.4962	38.5819	36.4111	25.7435	8.16336	19.9738
1899-12-31 15:09:27	0.153508	0.158632	2.27193	4.42273	11.7161	11.7264	16.0237	19.8813	29.9525	34.4772	40.0202	38.3721	38.5493	38.6425	36.4652	25.7704	8.17205	19.989
1899-12-31 15:09:28	0.153797	0.159742	2.27325	4.42492	11.7237	11.734	16.0359	19.8999	29.9877	34.5207	40.076	38.4356	38.6028	38.6997	36.5143	25.7929	8.17864	20.001
1899-12-31 15:09:29	0.154207	0.15949	2.27456	4.42779	11.7307	11.7407	16.0499	19.9207	30.0202	34.5667	40.1366	38.4948	38.6736	38.7653	36.5787	25.8289	8.19033	20.0252
1899-12-31 15:09:30	0.154375	0.159591	2.27562	4.42998	11.7372	11.7475	16.0613	19.9388	30.0548	34.6077	40.1926	38.5467	38.7306	38.8195	36.6292	25.8554	8.19738	20.0413
1899-12-31 15:09:31	0.154636	0.160224	2.27723	4.43238	11.7443	11.7551	16.076	19.9574	30.0834	34.6487	40.2444	38.6058	38.7882	38.8769	36.6842	25.8893	8.20606	20.0611
1899-12-31 15:09:32	0.154088	0.159695	2.27799	4.43467	11.75	11.7606	16.086	19.9711	30.1112	34.6802	40.2864	38.6462	38.8204	38.9186	36.7209	25.9061	8.21098	20.0717
1899-12-31 15:09:32	0.154463	0.159243	2.2795	4.43699	11.7559	11.7667	16.0954	19.9872	30.1297	34.715	40.3259	38.6929	38.8657	38.9649	36.7641	25.933	8.2164	20.0891
1899-12-31 15:09:33	0.154538	0.160011	2.28026	4.43913	11.7603	11.7703	16.102	19.9985	30.1506	34.7382	40.3579	38.7253	38.899	38.9961	36.7892	25.9447	8.21943	20.0956
1899-12-31 15:09:34	0.154586	0.160212	2.28133	4.44083	11.7652	11.7761	16.109	20.0085	30.1627	34.7605	40.388	38.7476	38.9286	39.0263	36.8188	25.9585	8.22409	20.1045
1899-12-31 15:09:35	0.154806	0.160337	2.2822	4.44216	11.7692	11.7803	16.1159	20.0162	30.1775	34.7775	40.4107	38.7696	38.9506	39.0474	36.8414	25.9718	8.23008	20.1121
1899-12-31 15:09:36	0.154618	0.160845	2.28311	4.44421	11.7724	11.7832	16.1198	20.0233	30.1905	34.7916	40.4274	38.7914	38.9724	39.0684	36.8624	25.9904	8.2372	20.1263
1899-12-31 15:09:37	0.155032	0.160627	2.28372	4.44516	11.7742	11.7854	16.1207	20.0245	30.195	34.793	40.4275	38.7919	38.9698	39.0645	36.8573	25.9861	8.2358	20.1215
1899-12-31 15:09:38	0.154897	0.159692	2.28466	4.44668	11.7769	11.7881	16.123	20.0281	30.1966	34.7966	40.4296	38.7957	38.9732	39.0682	36.8636	25.9922	8.23959	20.1273
1899-12-31 15:09:39	0.154662	0.16053	2.28542	4.44768	11.7783	11.7898	16.123	20.0274	30.1976	34.7944	40.4288	38.7888	38.9626	39.0588	36.8545	25.9884	8.23764	20.1236
1899-12-31 15:09:40	0.155197	0.160915	2.28628	4.44926	11.7812	11.7931	16.1243	20.0305	30.2007	34.7979	40.4316	38.7947	38.9717	39.0653	36.8638	26.0004	8.24315	20.1335
1899-12-31 15:09:41	0.155159	0.160517	2.28685	4.45063	11.7834	11.7945	16.1267	20.033	30.2078	34.8038	40.4391	38.8012	38.9741	39.0743	36.8772	26.013	8.24978	20.1465
1899-12-31 15:09:42	0.155038	0.160837	2.28786	4.45213	11.785	11.7959	16.1259	20.0322	30.2012	34.799	40.4265	38.788	38.9636	39.0606	36.8637	26.0053	8.24826	20.1408
1899-12-31 15:09:43	0.15542	0.160575	2.28844	4.45294	11.7862	11.7971	16.1256	20.0307	30.1978	34.7922	40.4143	38.771	38.9463	39.0442	36.8463	25.9961	8.24616	20.1344
1899-12-31 15:09:44	0.155358	0.160872	2.28886	4.4537	11.7879	11.7995	16.1242	20.0299	30.1977	34.7887	40.4107	38.7642	38.9362	39.0362	36.8414	25.9962	8.24754	20.1357
1899-12-31 15:09:45	0.15551	0.160049	2.28962	4.4552	11.7897	11.8023	16.1257	20.0319	30.1951	34.7906	40.4099	38.7666	38.9387	39.039	36.8485	26.0094	8.25222	20.1496
1899-12-31 15:09:46	0.155422	0.160658	2.29052	4.45601	11.7907	11.8018	16.1259	20.0302	30.1949	34.7857	40.4004	38.7579	38.9277	39.0281	36.8432	26.0125	8.25466	20.1541
1899-12-31 15:09:47	0.155399	0.160726	2.29092	4.45697	11.7918	11.8029	16.1226	20.0259	30.1856	34.7721	40.3772	38.7365	38.8973	38.9995	36.8134	25.9956	8.24886	20.1426
1899-12-31 15:09:48	0.155746	0.161414	2.29165	4.45801	11.7924	11.8046	16.1222	20.0251	30.1824	34.7654	40.3644	38.7244	38.8816	38.9854	36.8003	25.9933	8.24905	20.1416
1899-12-31 15:09:49	0.155684	0.160703	2.29246	4.45916	11.7943	11.8057	16.1206	20.0218	30.1748	34.7563	40.3496	38.7099	38.8606	38.9659	36.7815	25.9853	8.24641	20.1361
1899-12-31 15:09:50	0.1555	0.160557	2.29315	4.46045	11.7961	11.8077	16.1197	20.0218	30.1799	34.7526	40.3388	38.7011	38.8533	38.9584	36.7767	25.9867	8.24761	20.1398
1899-12-31 15:09:51	0.155781	0.160793	2.29387	4.46116	11.7964	11.8075	16.1161	20.0167	30.1669	34.738	40.3168	38.6732	38.826	38.93	36.7457	25.9663	8.2407	20.125
1899-12-31 15:09:52	0.155754	0.161168	2.29432	4.46241	11.7979	11.8095	16.1177	20.0163	30.1681	34.7371	40.3128	38.6701	38.8215	38.9255	36.7455	25.9705	8.24299	20.1314
1899-12-31 15:09:53	0.15574	0.162063	2.29527	4.46335	11.8005	11.8108	16.1178	20.0176	30.1714	34.7359	40.3073	38.6687	38.8184	38.9221	36.7478	25.9803	8.24627	20.1401
1899-12-31 15:09:54	0.156511	0.161008	2.29588	4.46509	11.8016	11.8129	16.1182	20.0175	30.1662	34.7327	40.3	38.6599	38.8129	38.9117	36.7373	25.9771	8.24579	20.1382
1899-12-31 15:09:55	0.156601	0.162027	2.29685	4.46617	11.8039	11.8152	16.1201	20.02	30.1689	34.7346	40.3029	38.6619	38.8111	38.912	36.7377	25.9821	8.24882	20.1434
1899-12-31 15:09:56	0.156529	0.16154	2.29786	4.46767	11.8069	11.8197	16.1229	20.0234	30.1792	34.7413	40.3103	38.6648	38.8143	38.9164	36.7467	25.9918	8.25264	20.1522
1899-12-31 15:09:57	0.156478	0.162644	2.29829	4.46907	11.8089	11.8203	16.1236	20.0254	30.1784	34.7437	40.3082	38.6639	38.8106	38.9122	36.7432	25.989	8.25358	20.1509
1899-12-31 15:09:58	0.156821	0.161421	2.29936	4.47038	11.8123	11.8229	16.1266	20.0294	30.1855	34.7497	40.314	38.6684	38.8175	38.9201	36.7529	26.0009	8.25905	20.1618
1899-12-31 15:09:59	0.157039	0.161728	2.29994	4.47215	11.814	11.8257	16.1272	20.0298	30.1851	34.7472	40.3094	38.6627	38.8115	38.9111	36.7423	25.9973	8.25676	20.1589
1899-12-31 15:11:15	0.164168	0.167135	2.35957	4.56845	11.9657	11.9816	16.1952	20.0819	30.214	34.6358	39.986	38.2984	38.3975	38.5014	36.4011	26.0104	8.32284	20.2461
1899-12-31 15:11:16	0.163878	0.167445	2.36057	4.57016	11.9709	11.9844	16.1991	20.0865	30.2132	34.6462	40.0022	38.3113	38.4132	38.5181	36.4217	26.0314	8.32806	20.2629
1899-12-31 15:11:17	0.163889	0.167783	2.36147	4.57231	11.975	11.9896	16.2039	20.0912	30.2146	34.6521	40.0084	38.3146	38.4146	38.5191	36.4193	26.0281	8.32683	20.2589
1899-12-31 15:11:18	0.163931	0.167521	2.36275	4.57342	11.9766	11.9904	16.2055	20.0915	30.2207	34.6482	39.9982	38.3012	38.3988	38.5055	36.3998	26.0068	8.3218	20.2416
1899-12-31 15:11:19	0.164037	0.167477	2.36338	4.57457	11.9793	11.9935	16.2059	20.0919	30.2167	34.6454	39.99	38.2899	38.3838	38.4916	36.379	25.9898	8.3173	20.2258
1899-12-31 15:11:20	0.164297	0.16774	2.36475	4.57687	11.9829	11.9969	16.212	20.0997	30.228	34.6611	40.0093	38.3099	38.4084	38.5142	36.407	26.0127	8.3254	20.2463
1899-12-31 15:11:21	0.163893	0.168335	2.36516	4.57838	11.9872	12.0008	16.2166	20.1076	30.237	34.6786	40.037	38.34	38.4374	38.5418	36.4402	26.0439	8.33387	20.2727
1899-12-31 15:11:22	0.164375	0.167604	2.36627	4.57958	11.9896	12.0045	16.2211	20.1115	30.246	34.6836	40.0421	38.3421	38.4409	38.5471	36.4436	26.0485	8.33606	20.2764
1899-12-31 15:11:23	0.164552	0.168641	2.36744	4.58142	11.9928	12.0058	16.2239	20.1146	30.2474	34.6884	40.0433	38.346	38.4431	38.5481	36.4442	26.0503	8.33839	20.2775
1899-12-31 15:11:24	0.164284	0.167745	2.36801	4.58252	11.9949	12.0076	16.2265	20.1162	30.2496	34.6873	40.0398	38.3411	38.4389	38.544	36.4381	26.0455	8.33767	20.2746
1899-12-31 15:11:25	0.1647	0.167223	2.36913	4.58399	11.9971	12.0111	16.2268	20.1186	30.2556	34.69	40.0407	38.3436	38.4404	38.5448	36.441	26.0495	8.34017	20.2795
1899-12-31 15:11:26	0.164283	0.167517	2.36949	4.58524	11.9997	12.0138	16.2283	20.1192	30.2536	34.6875	40.0378	38.3385	38.4363	38.5392	36.4347	26.0479	8.34009	20.2786
1899-12-31 15:11:27	0.164328	0.168525	2.3704	4.58674	12.0014	12.015	16.2286	20.119	30.2538	34.6838	40.0283	38.3301	38.4268	38.5312	36.428	26.047	8.34109	20.2793
1899-12-31 15:11:28	0.164826	0.168237	2.37116	4.58756	12.003	12.0172	16.2304	20.1201	30.2529	34.6846	40.0303	38.3287	38.4259	38.5306	36.4318	26.0572	8.34562	20.2886
1899-12-31 15:11:29	0.164859	0.167589	2.37157	4.58898	12.0051	12.0199	16.2316	20.1207	30.2486	34.6823	40.0246	38.3236	38.4197	38.5253	36.4297	26.061	8.34902	20.294
1899-12-31 15:11:30	0.164771	0.167904	2.37227	4.58982	12.0056	12.0199	16.2287	20.1157	30.2423	34.6664	39.999	38.2927	38.387	38.4946	36.396	26.0386	8.3428	20.2777
1899-12-31 15:11:31	0.165048	0.16836	2.3732	4.59064	12.0072	12.0219	16.2283	20.1133	30.2373	34.6574	39.9839	38.2769	38.3683	38.478	36.3802	26.0313	8.34251	20.2734
1899-12-31 15:11:31	0.165075	0.168147	2.37381	4.59233	12.0084	12.0236	16.2287	20.1123	30.2326	34.6508	39.9697	38.2658	38.3548	38.4642	36.3646	26.0242	8.33945	20.269
1899-12-31 15:11:32	0.165274	0.168244	2.37502	4.5934	12.01	12.0244	16.2284	20.1116	30.2328	34.6444	39.9578	38.2501	38.3357	38.4453	36.3409	26.0054	8.33514	20.2532
1899-12-31 15:11:33	0.165226	0.168977	2.3757	4.59455	12.0132	12.0269	16.2309	20.1152	30.2359	34.65	39.9663	38.2584	38.3421	38.4524	36.3512	26.0156	8.33783	20.2607
1899-12-31 15:11:34	0.165675	0.169697	2.37687	4.59611	12.017	12.0307	16.2364	20.1222	30.248	34.6613	39.9811	38.273	38.358	38.468	36.3654	26.0285	8.34268	20.2719
1899-12-31 15:11:35	0.165586	0.169645	2.37754	4.59776	12.0218	12.0351	16.2417	20.1288	30.2592	34.6769	39.9989	38.2876	38.3763	38.4857	36.3844	26.038	8.34649	20.2804
1899-12-31 15:11:36	0.165581	0.169234	2.3788	4.59979	12.0248	12.0387	16.2474	20.1358	30.2675	34.6896	40.0107	38.3028	38.3965	38.5011	36.3985	26.0489	8.35056	20.2875
1899-12-31 15:11:37	0.165738	0.16877	2.37969	4.60136	12.0278	12.0416	16.2507	20.1412	30.2739	34.6975	40.0212	38.3105	38.402	38.5085	36.4015	26.0508	8.35193	20.2887
1899-12-31 15:11:38	0.16607	0.169179	2.38045	4.60307	12.031	12.0459	16.2555	20.1471	30.2897	34.7093	40.0378	38.3258	38.4178	38.5233	36.4173	26.0655	8.35726	20.2995
1899-12-31 15:11:39	0.166188	0.169099	2.38128	4.60442	12.0343	12.0489	16.2588	20.1507	30.2925	34.7142	40.0397	38.3321	38.4215	38.5253	36.4172	26.0613	8.35667	20.2952
1899-12-31 15:11:40	0.16597	0.168758	2.38246	4.60588	12.0379	12.0515	16.2627	20.1554	30.3022	34.722	40.0471	38.34	38.4298	38.5345	36.4248	26.0666	8.35826	20.2981
1899-12-31 15:11:41	0.165866	0.169181	2.38332	4.60753	12.0412	12.054	16.2664	20.1607	30.31	34.7297	40.0548	38.347	38.4346	38.5424	36.4306	26.0707	8.35953	20.3002
1899-12-31 15:11:42	0.166098	0.170097	2.38412	4.60916	12.0438	12.0591	16.271	20.1662	30.3159	34.741	40.0669	38.3674	38.4518	38.5559	36.4496	26.086	8.36464	20.3119
1899-12-31 15:11:43	0.166434	0.169221	2.38524	4.61053	12.0478	12.0623	16.2754	20.1722	30.328	34.7521	40.0851	38.3861	38.4676	38.5718	36.4673	26.0986	8.36945	20.3217
1899-12-31 15:11:44	0.166385	0.169336	2.3862	4.61214	12.0507	12.0654	16.2804	20.1777	30.3375	34.7626	40.0993	38.398	38.4814	38.5856	36.4778	26.1067	8.37255	20.3274
1899-12-31 15:11:45	0.166322	0.168691	2.38727	4.61414	12.055	12.0697	16.2857	20.1848	30.3498	34.7766	40.1184	38.4184	38.5008	38.6079	36.5003	26.1243	8.37918	20.3412
1899-12-31 15:11:46	0.16627	0.169102	2.38799	4.61594	12.0588	12.0729	16.29	20.1894	30.3599	34.7852	40.1254	38.4226	38.5073	38.6145	36.5029	26.1226	8.38004	20.3376
1899-12-31 15:11:47	0.166419	0.170517	2.3891	4.61758	12.0623	12.0773	16.2955	20.1971	30.3703	34.7996	40.1471	38.4433	38.5251	38.6368	36.5269	26.1398	8.38696	20.3512
1899-12-31 15:11:48	0.16675	0.16952	2.39011	4.61926	12.0662	12.0801	16.3007	20.2043	30.3837	34.8113	40.1595	38.4599	38.5375	38.6506	36.5399	26.1481	8.38884	20.3555
1899-12-31 15:11:49	0.16701	0.170196	2.39098	4.62058	12.0688	12.0847	16.3044	20.2098	30.39	34.8225	40.1693	38.4705	38.5454	38.6624	36.55	26.1522	8.39006	20.3576
1899-12-31 15:11:50	0.166821	0.169765	2.3919	4.62257	12.0723	12.0865	16.3094	20.2155	30.3986	34.8327	40.1804	38.4779	38.5542	38.6711	36.5517	26.147	8.38855	20.3516
1899-12-31 15:11:51	0.167179	0.169879	2.39311	4.62427	12.0772	12.0899	16.3162	20.2244	30.4142	34.8498	40.2015	38.4981	38.5775	38.6952	36.575	26.1624	8.39362	20.3619
1899-12-31 15:11:52	0.167357	0.170993	2.39438	4.62625	12.0811	12.0968	16.3238	20.2337	30.4309	34.8684	40.232	38.5228	38.6063	38.7228	36.6012	26.1798	8.40005	20.3741
1899-12-31 15:11:53	0.167303	0.170499	2.39504	4.62758	12.0854	12.1007	16.3301	20.243	30.4475	34.8883	40.2541	38.5469	38.6356	38.7482	36.6252	26.194	8.40398	20.3827
1899-12-31 15:11:54	0.167051	0.170707	2.39639	4.6297	12.0893	12.104	16.3364	20.2486	30.4596	34.9004	40.2704	38.5642	38.6505	38.7618	36.6361	26.1953	8.4048	20.3802
1899-12-31 15:11:55	0.167328	0.170264	2.3974	4.63154	12.0945	12.11	16.3434	20.2597	30.4778	34.9231	40.2953	38.5997	38.6873	38.7964	36.6727	26.2211	8.41317	20.4005
1899-12-31 15:11:56	0.167486	0.170651	2.39841	4.63353	12.0983	12.1128	16.3472	20.2654	30.4855	34.9334	40.309	38.609	38.6986	38.8084	36.6806	26.2216	8.41389	20.4003
1899-12-31 15:11:57	0.167672	0.171899	2.39933	4.63507	12.1022	12.1165	16.3543	20.274	30.4982	34.9493	40.3298	38.6349	38.7217	38.8325	36.7058	26.2402	8.42052	20.4157
1899-12-31 15:11:58	0.168034	0.171729	2.40058	4.63646	12.1059	12.1202	16.3582	20.2797	30.5083	34.9606	40.3478	38.6463	38.7371	38.8471	36.7196	26.246	8.42343	20.4192
1899-12-31 15:11:59	0.167965	0.170754	2.40151	4.63818	12.1092	12.1241	16.3637	20.2871	30.5171	34.9739	40.3644	38.6625	38.7542	38.8635	36.733	26.2556	8.42665	20.426
1899-12-31 15:12:00	0.167828	0.170569	2.40203	4.63986	12.1129	12.1266	16.3688	20.292	30.5244	34.9846	40.3789	38.6726	38.7654	38.8762	36.7451	26.2662	8.43102	20.4337
1899-12-31 15:13:15	0.17537	0.178411	2.46907	4.74816	12.3102	12.3297	16.5549	20.4957	30.7914	35.2192	40.5601	38.8256	38.9006	39.0174	36.8967	26.4736	8.55421	20.6177
1899-12-31 15:13:16	0.175542	0.176985	2.46978	4.75081	12.3166	12.3331	16.5621	20.5039	30.8012	35.2345	40.5815	38.8456	38.9216	39.0367	36.9077	26.4723	8.5537	20.6162
1899-12-31 15:13:17	0.175874	0.177655	2.47136	4.75354	12.3235	12.34	16.5732	20.5186	30.8262	35.2645	40.6153	38.8841	38.9633	39.0751	36.9403	26.4896	8.55874	20.6252
1899-12-31 15:13:18	0.175847	0.177997	2.4727	4.75561	12.3288	12.3448	16.5818	20.5296	30.8435	35.2866	40.6455	38.9121	38.9924	39.1058	36.9677	26.5047	8.56483	20.6339
1899-12-31 15:13:19	0.175802	0.17757	2.47418	4.75782	12.3343	12.3516	16.5913	20.5431	30.8658	35.3162	40.6897	38.9506	39.0321	39.1447	37.0085	26.5279	8.5717	20.6525
1899-12-31 15:13:20	0.175872	0.177912	2.47507	4.76019	12.3398	12.3556	16.6006	20.555	30.8897	35.3416	40.7226	38.9911	39.0622	39.1823	37.0438	26.5511	8.57995	20.6679
1899-12-31 15:13:21	0.176281	0.177457	2.47634	4.76196	12.3441	12.3619	16.6079	20.5648	30.9048	35.3591	40.7442	39.0122	39.0829	39.2055	37.0615	26.5595	8.58279	20.6721
1899-12-31 15:13:22	0.176058	0.178428	2.47735	4.76367	12.3486	12.3662	16.6141	20.5717	30.9162	35.3723	40.7584	39.0259	39.0961	39.2174	37.0667	26.5554	8.58097	20.6655
1899-12-31 15:13:23	0.176441	0.176876	2.47863	4.76589	12.354	12.3711	16.6226	20.5843	30.9343	35.4001	40.7989	39.0698	39.1427	39.2618	37.116	26.5939	8.59375	20.6947
1899-12-31 15:13:24	0.176868	0.179116	2.47955	4.7675	12.3578	12.3758	16.6289	20.5911	30.9463	35.4132	40.8162	39.0861	39.1561	39.2774	37.1273	26.5967	8.59391	20.6955
1899-12-31 15:13:25	0.176532	0.178669	2.48055	4.7693	12.3615	12.3776	16.6334	20.5967	30.9543	35.4221	40.823	39.0933	39.1639	39.2842	37.1287	26.5925	8.59203	20.6892
1899-12-31 15:13:26	0.17641	0.178373	2.48162	4.77119	12.3659	12.3816	16.6388	20.6054	30.9676	35.4391	40.8416	39.1136	39.1862	39.3056	37.1487	26.6041	8.59526	20.6978
1899-12-31 15:13:27	0.176737	0.178246	2.48292	4.7733	12.3697	12.3877	16.6456	20.6132	30.9808	35.4539	40.8593	39.1273	39.2027	39.3211	37.1589	26.607	8.59594	20.6974
1899-12-31 15:13:28	0.176938	0.178761	2.4839	4.77506	12.3742	12.3909	16.6512	20.6203	30.9868	35.4647	40.872	39.1393	39.2129	39.3327	37.1656	26.6059	8.59451	20.6943
1899-12-31 15:13:29	0.177039	0.17855	2.48471	4.77658	12.3775	12.3951	16.6551	20.6251	30.9914	35.4703	40.874	39.1405	39.2173	39.334	37.1578	26.5932	8.59098	20.6816
1899-12-31 15:13:30	0.17723	0.178594	2.48576	4.7787	12.3822	12.3999	16.6622	20.6337	31.0045	35.4885	40.902	39.1668	39.2446	39.3614	37.1876	26.6169	8.59837	20.6994
1899-12-31 15:13:31	0.177243	0.179032	2.4871	4.78099	12.3865	12.4031	16.6705	20.6452	31.0231	35.5112	40.9296	39.1991	39.2821	39.3956	37.2252	26.6442	8.60909	20.7227
1899-12-31 15:13:32	0.177237	0.178798	2.48836	4.78267	12.3916	12.4087	16.6784	20.6537	31.0368	35.5285	40.9519	39.2188	39.3048	39.419	37.2478	26.6574	8.61351	20.7331
1899-12-31 15:13:33	0.177821	0.177809	2.48944	4.78418	12.3962	12.4126	16.6839	20.6627	31.0521	35.5462	40.9722	39.2434	39.3264	39.4441	37.2718	26.674	8.61972	20.7442
1899-12-31 15:13:34	0.177552	0.179439	2.49039	4.78623	12.4008	12.4175	16.6923	20.6725	31.0705	35.5667	40.9998	39.2757	39.3576	39.4762	37.3065	26.6994	8.62906	20.7646
1899-12-31 15:13:35	0.17767	0.178653	2.49176	4.78844	12.4049	12.4224	16.6983	20.6804	31.0807	35.5811	41.0182	39.2945	39.3744	39.4919	37.317	26.7039	8.63037	20.7658
1899-12-31 15:13:36	0.177468	0.179345	2.49252	4.79031	12.4089	12.4265	16.7055	20.6895	31.096	35.5991	41.0414	39.3183	39.3945	39.5132	37.3366	26.7133	8.63332	20.7719
1899-12-31 15:13:37	0.178515	0.18024	2.49394	4.79227	12.4143	12.4319	16.7143	20.7007	31.1106	35.6224	41.0705	39.3492	39.4282	39.5453	37.3659	26.7296	8.64051	20.7835
1899-12-31 15:13:38	0.177996	0.1792	2.49476	4.79424	12.4195	12.436	16.72	20.7097	31.1245	35.6393	41.0877	39.3679	39.4447	39.5632	37.3785	26.7298	8.64053	20.7796
1899-12-31 15:13:39	0.178059	0.179739	2.49619	4.79612	12.424	12.4407	16.7278	20.7209	31.1421	35.6625	41.1184	39.3976	39.4801	39.5947	37.4065	26.7465	8.64578	20.7911
1899-12-31 15:13:40	0.178106	0.179709	2.49736	4.79832	12.4291	12.447	16.7368	20.7316	31.1575	35.685	41.1487	39.427	39.5102	39.624	37.4321	26.7594	8.65024	20.799
1899-12-31 15:13:41	0.178431	0.180314	2.4984	4.80049	12.4354	12.4517	16.7458	20.7449	31.1778	35.7121	41.1845	39.4579	39.5497	39.6618	37.4684	26.7807	8.65592	20.8135
1899-12-31 15:13:42	0.178219	0.180043	2.49963	4.80205	12.4393	12.4563	16.7536	20.7538	31.194	35.7272	41.2029	39.4747	39.5641	39.6759	37.4754	26.7756	8.65324	20.806
1899-12-31 15:13:43	0.178183	0.180107	2.50055	4.80468	12.4448	12.462	16.7618	20.7658	31.2141	35.7538	41.236	39.5159	39.5989	39.7149	37.514	26.8019	8.66153	20.8252
1899-12-31 15:13:44	0.179024	0.180301	2.50167	4.80617	12.4496	12.4659	16.7692	20.7743	31.2279	35.7703	41.256	39.5379	39.6183	39.7364	37.5323	26.809	8.66457	20.8286
1899-12-31 15:13:45	0.179042	0.179721	2.50272	4.80825	12.4543	12.4714	16.7766	20.7845	31.2438	35.7913	41.2859	39.5659	39.6438	39.7662	37.5618	26.831	8.67031	20.8426
1899-12-31 15:13:46	0.17865	0.181154	2.50423	4.81043	12.4587	12.4767	16.7839	20.795	31.2646	35.8117	41.3101	39.5879	39.6697	39.7934	37.5881	26.846	8.67535	20.8524
1899-12-31 15:13:47	0.17905	0.180604	2.50521	4.8124	12.4635	12.4807	16.7906	20.8036	31.2781	35.8288	41.3312	39.6106	39.694	39.8153	37.6059	26.8544	8.68013	20.8577
1899-12-31 15:13:48	0.179257	0.181159	2.50632	4.81432	12.468	12.4856	16.7984	20.8129	31.2943	35.8469	41.3589	39.6343	39.7221	39.8416	37.6326	26.8743	8.68612	20.8728
1899-12-31 15:13:49	0.179366	0.180668	2.50731	4.81582	12.4714	12.4891	16.8022	20.8187	31.3024	35.8576	41.3724	39.6429	39.7297	39.8488	37.6355	26.8716	8.68541	20.8693
1899-12-31 15:13:50	0.179572	0.18093	2.5085	4.81781	12.4764	12.4944	16.8101	20.8288	31.3176	35.876	41.4004	39.6719	39.7593	39.876	37.6652	26.8945	8.69324	20.8861
1899-12-31 15:13:50	0.179771	0.180848	2.5096	4.82	12.4802	12.4957	16.8144	20.8343	31.3274	35.8834	41.4084	39.6772	39.7647	39.8818	37.6648	26.8899	8.69206	20.88
1899-12-31 15:13:51	0.179698	0.180691	2.51047	4.82154	12.4847	12.5018	16.8212	20.8414	31.3385	35.8974	41.4233	39.6913	39.7795	39.8983	37.6777	26.8969	8.69538	20.8856
1899-12-31 15:13:52	0.179698	0.181202	2.51183	4.82342	12.4877	12.5063	16.8268	20.8484	31.3435	35.909	41.4382	39.7009	39.7926	39.9113	37.687	26.9021	8.69833	20.8896
1899-12-31 15:13:53	0.179633	0.18055	2.51281	4.82523	12.4922	12.5104	16.8327	20.8563	31.3591	35.9253	41.4533	39.7205	39.8104	39.9296	37.7046	26.91	8.7007	20.8955
1899-12-31 15:13:54	0.179832	0.181651	2.51384	4.82691	12.4969	12.5138	16.8368	20.8629	31.3687	35.9355	41.4644	39.7272	39.8173	39.9347	37.703	26.9027	8.69743	20.885
1899-12-31 15:13:55	0.1803	0.181721	2.51479	4.82915	12.5022	12.5193	16.846	20.874	31.3881	35.9577	41.4876	39.7605	39.8493	39.9648	37.7357	26.9234	8.70416	20.9014
1899-12-31 15:13:56	0.180217	0.182779	2.51606	4.8314	12.5081	12.5248	16.8564	20.8872	31.4103	35.988	41.5337	39.8074	39.8904	40.0137	37.7881	26.9658	8.72017	20.9352
1899-12-31 15:13:57	0.180174	0.181546	2.51758	4.8334	12.5124	12.5288	16.8639	20.8965	31.4287	36.0045	41.552	39.8275	39.9095	40.0343	37.8049	26.9735	8.72209	20.9392
1899-12-31 15:13:58	0.180512	0.182792	2.51856	4.83467	12.515	12.5339	16.867	20.9013	31.4327	36.0105	41.5568	39.8246	39.9081	40.0328	37.7927	26.9554	8.71542	20.9199
1899-12-31 15:13:59	0.18018	0.183178	2.51948	4.83674	12.5199	12.5386	16.8735	20.9113	31.4456	36.0302	41.5835	39.8508	39.9328	40.0583	37.8165	26.968	8.71944	20.9292
1899-12-31 15:15:15	0.189743	0.188354	2.58634	4.94365	12.7012	12.7201	17.0036	21.0156	31.5346	36.0176	41.4144	39.651	39.7348	39.852	37.64	27.0056	8.79666	21.0231
1899-12-31 15:15:16	0.18849	0.189351	2.58716	4.94545	12.7041	12.7222	17.0093	21.026	31.5566	36.04	41.4546	39.6811	39.7648	39.8824	37.6735	27.0264	8.80686	21.0398
1899-12-31 15:15:17	0.188579	0.190447	2.58915	4.94896	12.713	12.731	17.0245	21.0451	31.5853	36.0811	41.5126	39.7428	39.8234	39.9374	37.7297	27.0625	8.81929	21.0647
1899-12-31 15:15:18	0.188553	0.189186	2.59055	4.95149	12.7198	12.7387	17.0353	21.0613	31.6078	36.1136	41.5491	39.7825	39.859	39.9817	37.7628	27.0729	8.82416	21.0681
1899-12-31 15:15:19	0.188576	0.18923	2.59198	4.95414	12.7274	12.746	17.0508	21.0839	31.6482	36.1636	41.6229	39.8513	39.9251	40.0513	37.8242	27.1027	8.83261	21.083
1899-12-31 15:15:20	0.188927	0.188957	2.59412	4.958	12.7388	12.7567	17.073	21.1155	31.7025	36.2349	41.7158	39.9546	40.0315	40.1575	37.9259	27.1647	8.85231	21.1253
1899-12-31 15:15:21	0.189211	0.190748	2.59547	4.96143	12.7485	12.7666	17.0925	21.1432	31.7498	36.2957	41.7956	40.0371	40.1148	40.2383	37.9932	27.1924	8.86144	21.1388
1899-12-31 15:15:22	0.189421	0.189982	2.59756	4.96521	12.7601	12.7774	17.1162	21.1755	31.8037	36.3682	41.8951	40.1342	40.2105	40.3395	38.0868	27.2384	8.87562	21.1689
1899-12-31 15:15:23	0.189003	0.189681	2.59949	4.96843	12.7712	12.7899	17.138	21.2072	31.861	36.4382	41.9838	40.228	40.3128	40.4367	38.1746	27.284	8.88868	21.1979
1899-12-31 15:15:24	0.189782	0.190173	2.60115	4.97172	12.781	12.7999	17.1562	21.2334	31.9008	36.4941	42.0559	40.3073	40.388	40.5088	38.235	27.3068	8.89435	21.2073
1899-12-31 15:15:25	0.189428	0.189816	2.60324	4.97496	12.7908	12.8094	17.1757	21.2611	31.947	36.5555	42.1398	40.3932	40.4727	40.5983	38.3192	27.3559	8.9087	21.2376
1899-12-31 15:15:26	0.189928	0.190902	2.60461	4.97784	12.799	12.8167	17.1924	21.2828	31.9805	36.6037	42.2023	40.4536	40.54	40.6649	38.3772	27.3842	8.91747	21.254
1899-12-31 15:15:27	0.190181	0.191442	2.60663	4.98077	12.8067	12.8252	17.2064	21.3022	32.0138	36.6464	42.2604	40.5161	40.606	40.7273	38.4376	27.4193	8.92849	21.2788
1899-12-31 15:15:28	0.190396	0.191605	2.60735	4.98308	12.8117	12.8309	17.2142	21.3122	32.0287	36.6659	42.283	40.5362	40.6238	40.7463	38.45	27.4192	8.92901	21.2735
1899-12-31 15:15:29	0.190556	0.190813	2.60858	4.98482	12.8153	12.8346	17.2198	21.3207	32.0417	36.6814	42.3026	40.5553	40.6451	40.7658	38.4654	27.4252	8.92916	21.2775
1899-12-31 15:15:30	0.190282	0.191976	2.6097	4.98632	12.8192	12.8376	17.2244	21.3262	32.0504	36.6901	42.3133	40.5625	40.6524	40.7725	38.4696	27.423	8.93056	21.2751
1899-12-31 15:15:31	0.190851	0.192264	2.61078	4.9885	12.8235	12.8428	17.2308	21.3337	32.0638	36.7046	42.3396	40.5858	40.6728	40.7941	38.4907	27.4406	8.9352	21.2881
1899-12-31 15:15:32	0.190981	0.192228	2.61178	4.98988	12.8267	12.8449	17.2332	21.338	32.0677	36.7095	42.3426	40.5876	40.6717	40.7945	38.4871	27.4341	8.93346	21.282
1899-12-31 15:15:33	0.191013	0.191383	2.61268	4.99139	12.8304	12.85	17.2385	21.3438	32.0755	36.7193	42.3535	40.5954	40.6831	40.804	38.4951	27.4362	8.93478	21.284
1899-12-31 15:15:33	0.190771	0.192335	2.614	4.99369	12.8358	12.8545	17.2476	21.3555	32.0936	36.7459	42.3852	40.633	40.7201	40.8457	38.5394	27.4717	8.94799	21.311
1899-12-31 15:15:34	0.191039	0.192377	2.61498	4.99595	12.8414	12.8604	17.2563	21.3667	32.1135	36.7683	42.4152	40.6594	40.7487	40.8746	38.5661	27.4835	8.95249	21.3195
1899-12-31 15:15:35	0.191296	0.191514	2.61648	4.99872	12.8478	12.8661	17.2672	21.3807	32.1348	36.7983	42.4537	40.6975	40.7889	40.9172	38.6054	27.5049	8.95983	21.3328
1899-12-31 15:15:36	0.191607	0.193329	2.61812	5.00087	12.8541	12.8731	17.2771	21.3957	32.1603	36.8289	42.4959	40.7407	40.8304	40.9582	38.6384	27.5183	8.96466	21.3391
1899-12-31 15:15:37	0.191303	0.192138	2.61929	5.00359	12.8608	12.8799	17.2916	21.4152	32.1936	36.8715	42.5549	40.7986	40.8925	41.0167	38.6925	27.5468	8.97388	21.3576
1899-12-31 15:15:38	0.191403	0.192232	2.62057	5.00603	12.8687	12.8872	17.3047	21.4337	32.2236	36.9106	42.6094	40.8499	40.9431	41.0674	38.7343	27.5645	8.97955	21.3657
1899-12-31 15:15:39	0.191926	0.19283	2.62273	5.00908	12.8775	12.8963	17.3213	21.4552	32.2593	36.9556	42.6654	40.9101	41.0065	41.13	38.791	27.5946	8.98935	21.3862
1899-12-31 15:15:40	0.191601	0.192534	2.62404	5.01187	12.8852	12.905	17.3351	21.4758	32.2921	36.9997	42.7221	40.9667	41.0559	41.1889	38.8412	27.6211	8.99672	21.3986
1899-12-31 15:15:41	0.192107	0.193672	2.62569	5.01459	12.8934	12.9124	17.3507	21.4965	32.3294	37.0452	42.7772	41.029	41.1201	41.2476	38.8946	27.6494	9.00605	21.4158
1899-12-31 15:15:42	0.191825	0.193027	2.62743	5.01794	12.9015	12.9208	17.3657	21.5179	32.3588	37.0909	42.8377	41.0949	41.1814	41.3099	38.9512	27.6771	9.01572	21.4338
1899-12-31 15:15:43	0.192538	0.192964	2.62896	5.02027	12.9086	12.9279	17.3788	21.5361	32.3902	37.1305	42.8918	41.1442	41.24	41.365	39	27.7011	9.02311	21.4495
1899-12-31 15:15:44	0.192381	0.193571	2.63016	5.02303	12.9152	12.9341	17.3903	21.5524	32.4106	37.1636	42.9289	41.1877	41.2837	41.4077	39.0374	27.717	9.02779	21.4589
1899-12-31 15:15:45	0.192311	0.194136	2.63156	5.02513	12.9192	12.9398	17.3982	21.5605	32.424	37.1799	42.9508	41.2051	41.2993	41.4253	39.0454	27.7149	9.02738	21.4537
1899-12-31 15:15:46	0.192858	0.193814	2.63287	5.02743	12.925	12.9452	17.4061	21.5726	32.446	37.204	42.9849	41.237	41.3277	41.4602	39.0827	27.7417	9.03537	21.4733
1899-12-31 15:15:47	0.192966	0.1938	2.63371	5.02871	12.9276	12.9471	17.4083	21.574	32.4442	37.2042	42.9814	41.233	41.3279	41.4558	39.0735	27.7325	9.03303	21.4657
1899-12-31 15:15:48	0.192974	0.194052	2.63459	5.0305	12.9314	12.9514	17.4134	21.5812	32.4556	37.2166	43.0001	41.2451	41.3398	41.4741	39.0966	27.7546	9.03992	21.4845
1899-12-31 15:15:49	0.192929	0.19345	2.63561	5.03211	12.9342	12.9542	17.4148	21.5829	32.4605	37.2171	42.9993	41.2482	41.3379	41.4727	39.099	27.7607	9.04238	21.4908
1899-12-31 15:15:50	0.193216	0.194014	2.63623	5.03327	12.9359	12.9548	17.4143	21.5807	32.4547	37.2078	42.9817	41.2326	41.3246	41.457	39.0821	27.7521	9.04058	21.4844
1899-12-31 15:15:51	0.193539	0.194634	2.63741	5.03451	12.9376	12.957	17.4151	21.5791	32.4474	37.2004	42.9681	41.2216	41.3122	41.4413	39.0646	27.7394	9.03707	21.4746
1899-12-31 15:15:52	0.193383	0.195584	2.63826	5.03567	12.9393	12.9595	17.4153	21.5784	32.448	37.1938	42.955	41.2057	41.2997	41.4253	39.0453	27.7226	9.03271	21.4621
1899-12-31 15:15:53	0.193535	0.194288	2.63926	5.03715	12.9418	12.9622	17.4188	21.5803	32.4488	37.1949	42.9561	41.2043	41.2968	41.4224	39.0418	27.7188	9.0319	21.459
1899-12-31 15:15:54	0.193707	0.193407	2.64028	5.03905	12.9452	12.9655	17.4225	21.5869	32.4617	37.2073	42.9734	41.2175	41.3119	41.4408	39.0614	27.7366	9.03871	21.4738
1899-12-31 15:15:55	0.193633	0.19395	2.64106	5.04102	12.9507	12.9691	17.4293	21.5949	32.4767	37.2247	42.9948	41.2412	41.335	41.467	39.0869	27.7557	9.04604	21.4879
1899-12-31 15:15:56	0.193382	0.194391	2.64226	5.04311	12.9554	12.9736	17.437	21.6045	32.4883	37.2429	43.0177	41.2662	41.3586	41.4936	39.1116	27.7712	9.0517	21.4983
1899-12-31 15:15:57	0.194229	0.19496	2.64369	5.04515	12.96	12.9792	17.4438	21.6135	32.5063	37.2584	43.0331	41.2851	41.3782	41.511	39.1239	27.7747	9.05418	21.5004
1899-12-31 15:15:58	0.193682	0.195459	2.64497	5.04699	12.9655	12.9841	17.4515	21.6243	32.5215	37.2786	43.0614	41.3148	41.4106	41.5396	39.1508	27.7893	9.06069	21.5107
1899-12-31 15:15:59	0.194324	0.196067	2.64584	5.04952	12.9705	12.9912	17.4628	21.6373	32.5434	37.305	43.0978	41.3536	41.4426	41.5734	39.1824	27.8062	9.06618	21.5206
1899-12-31 15:16:00	0.194205	0.194699	2.6475	5.05211	12.9764	12.9958	17.4711	21.6487	32.5616	37.3287	43.1256	41.378	41.4698	41.6009	39.2047	27.8145	9.06865	21.5251
1899-12-31 15:17:15	0.202978	0.20211	2.72464	5.17719	13.2168	13.2412	17.7226	21.9301	32.9381	37.7049	43.486	41.6881	41.7734	41.9101	39.4741	28.0538	9.21991	21.7319
1899-12-31 15:17:16	0.203575	0.204001	2.72494	5.17853	13.2185	13.2391	17.7226	21.9316	32.9411	37.6988	43.4734	41.6743	41.7665	41.8931	39.4571	28.037	9.2107	21.7188
1899-12-31 15:17:17	0.204048	0.204752	2.72599	5.1806	13.2224	13.2417	17.7262	21.935	32.9479	37.702	43.4727	41.6759	41.7644	41.8938	39.4568	28.037	9.21069	21.7202
1899-12-31 15:17:18	0.203758	0.20451	2.72723	5.18288	13.2261	13.2462	17.7306	21.9391	32.9526	37.7083	43.4829	41.683	41.7763	41.9038	39.47	28.0532	9.21563	21.7345
1899-12-31 15:17:19	0.203588	0.204994	2.72775	5.18381	13.2269	13.2475	17.7291	21.9379	32.9492	37.7007	43.4692	41.665	41.7571	41.8844	39.4486	28.0381	9.21196	21.7237
1899-12-31 15:17:20	0.20425	0.204348	2.72901	5.18526	13.2307	13.2514	17.7328	21.9401	32.9543	37.7036	43.4697	41.6699	41.7585	41.8852	39.4547	28.0466	9.21528	21.7316
1899-12-31 15:17:21	0.203987	0.204484	2.73027	5.18693	13.2328	13.253	17.7361	21.9414	32.9544	37.703	43.4706	41.665	41.7597	41.8868	39.4544	28.0506	9.21714	21.7364
1899-12-31 15:17:22	0.204681	0.205125	2.73143	5.18844	13.2358	13.2568	17.7367	21.9432	32.957	37.704	43.468	41.666	41.7563	41.8842	39.4547	28.053	9.21869	21.7388
1899-12-31 15:17:23	0.204257	0.205012	2.73191	5.1901	13.2383	13.2601	17.7403	21.9459	32.9622	37.7065	43.4718	41.6667	41.7598	41.8869	39.457	28.0575	9.22163	21.742
1899-12-31 15:17:24	0.204219	0.20515	2.73312	5.19169	13.2424	13.2628	17.7444	21.9516	32.9689	37.7168	43.4824	41.6822	41.7752	41.9008	39.4715	28.0662	9.22507	21.7503
1899-12-31 15:17:25	0.204375	0.204265	2.73443	5.19372	13.247	13.2677	17.7506	21.9593	32.9786	37.7296	43.4976	41.6959	41.7883	41.9156	39.4824	28.0722	9.22819	21.753
1899-12-31 15:17:26	0.204701	0.204491	2.73523	5.19578	13.2517	13.2715	17.7569	21.9678	32.9939	37.7454	43.5129	41.7159	41.8099	41.9366	39.5011	28.0819	9.23293	21.76
1899-12-31 15:17:27	0.205022	0.206276	2.73639	5.19828	13.2569	13.2776	17.7652	21.9782	33.0062	37.7654	43.54	41.7427	41.839	41.962	39.5273	28.0964	9.2377	21.7705
1899-12-31 15:17:28	0.204895	0.205664	2.73821	5.20014	13.2617	13.2833	17.7725	21.9877	33.0283	37.7843	43.5662	41.7623	41.856	41.9823	39.543	28.1047	9.24079	21.7732
1899-12-31 15:17:29	0.205005	0.205127	2.73911	5.2028	13.2682	13.2874	17.7814	22.0008	33.0494	37.8107	43.6047	41.7999	41.8925	42.0187	39.5766	28.1275	9.25039	21.79
1899-12-31 15:17:30	0.204852	0.204848	2.74055	5.20536	13.2728	13.2929	17.7898	22.0114	33.0609	37.8293	43.6288	41.8186	41.9121	42.0388	39.5898	28.1306	9.25158	21.7906
1899-12-31 15:17:31	0.205572	0.205434	2.74204	5.20687	13.2781	13.2994	17.7971	22.0216	33.0764	37.8487	43.648	41.8388	41.9311	42.0591	39.6057	28.1387	9.25414	21.7946
1899-12-31 15:17:32	0.205499	0.206117	2.74289	5.20918	13.2827	13.3022	17.8035	22.0296	33.09	37.8622	43.6648	41.85	41.9406	42.072	39.6122	28.1392	9.25456	21.7939
1899-12-31 15:17:33	0.205691	0.206169	2.74428	5.21113	13.2868	13.3079	17.8093	22.036	33.0991	37.875	43.6788	41.8628	41.9544	42.0844	39.6207	28.1407	9.2551	21.7936
1899-12-31 15:17:34	0.205669	0.20647	2.74513	5.21326	13.2913	13.3114	17.8142	22.0436	33.1093	37.8874	43.6925	41.8815	41.9713	42.0999	39.6371	28.1529	9.26	21.8021
1899-12-31 15:17:35	0.205294	0.206229	2.74642	5.21478	13.2946	13.3147	17.8204	22.0488	33.1187	37.897	43.6989	41.888	41.9802	42.1091	39.6449	28.1565	9.26148	21.8063
1899-12-31 15:17:36	0.205526	0.206288	2.7477	5.21652	13.2984	13.3203	17.8259	22.0548	33.1263	37.9066	43.7103	41.8997	41.9904	42.1229	39.6601	28.1713	9.2662	21.8162
1899-12-31 15:17:37	0.205813	0.205947	2.74841	5.21825	13.3012	13.3226	17.8274	22.0559	33.1289	37.9067	43.7073	41.897	41.9856	42.1166	39.6535	28.1662	9.26596	21.8122
1899-12-31 15:17:38	0.206508	0.206056	2.74921	5.21978	13.3036	13.3251	17.8293	22.058	33.1316	37.9075	43.7068	41.8979	41.9876	42.1165	39.6538	28.1691	9.26864	21.8149
1899-12-31 15:17:39	0.206193	0.206456	2.75019	5.22104	13.3059	13.3267	17.8296	22.0576	33.1305	37.9029	43.7003	41.8898	41.978	42.1078	39.6448	28.1619	9.26833	21.8104
1899-12-31 15:17:40	0.206284	0.206928	2.75097	5.22252	13.3083	13.3291	17.8327	22.0597	33.1317	37.9041	43.7014	41.8869	41.9798	42.109	39.6471	28.1681	9.27151	21.8174
1899-12-31 15:17:41	0.206751	0.206937	2.7518	5.22403	13.3101	13.3306	17.8342	22.0601	33.1306	37.9019	43.695	41.8833	41.9734	42.103	39.6423	28.1637	9.27145	21.8155
1899-12-31 15:17:42	0.206605	0.20717	2.75296	5.22543	13.3133	13.3336	17.8356	22.0632	33.1333	37.9039	43.6941	41.8844	41.9728	42.1029	39.6424	28.1678	9.27398	21.8185
1899-12-31 15:17:43	0.206611	0.207213	2.75359	5.227	13.3157	13.337	17.8382	22.0644	33.1361	37.9047	43.695	41.8819	41.9721	42.0984	39.6391	28.1662	9.27494	21.8178
1899-12-31 15:17:44	0.206631	0.207527	2.75465	5.22878	13.3192	13.3389	17.8396	22.0671	33.1403	37.9075	43.6969	41.8867	41.973	42.1025	39.6433	28.1724	9.27793	21.8225
1899-12-31 15:17:45	0.207135	0.20765	2.75616	5.22998	13.322	13.3426	17.8433	22.0712	33.1435	37.9137	43.7029	41.8932	41.9823	42.1097	39.651	28.1789	9.28135	21.829
1899-12-31 15:17:46	0.206856	0.207812	2.75712	5.23173	13.3252	13.3454	17.8463	22.0751	33.152	37.9184	43.7104	41.8974	41.9865	42.1163	39.6597	28.1839	9.28436	21.8344
1899-12-31 15:17:47	0.207206	0.207635	2.75812	5.23352	13.3279	13.3489	17.8503	22.0781	33.1589	37.924	43.7146	41.8976	41.9907	42.121	39.6632	28.1885	9.28723	21.8373
1899-12-31 15:17:48	0.207231	0.207797	2.7587	5.23493	13.3308	13.3524	17.8532	22.0806	33.1571	37.9248	43.7124	41.8998	41.9884	42.1196	39.6621	28.1878	9.28767	21.8383
1899-12-31 15:17:49	0.20727	0.207844	2.75986	5.23658	13.3326	13.3548	17.8544	22.0822	33.162	37.9267	43.7126	41.897	41.9861	42.115	39.6563	28.1845	9.28698	21.8336
1899-12-31 15:17:50	0.207778	0.208374	2.76062	5.23809	13.3358	13.3562	17.857	22.0848	33.1645	37.928	43.7131	41.8945	41.985	42.1141	39.6532	28.1807	9.28609	21.8311
1899-12-31 15:17:51	0.207573	0.208218	2.76165	5.24004	13.3386	13.3601	17.8606	22.0879	33.1662	37.9306	43.7118	41.8911	41.981	42.1111	39.6451	28.1724	9.28367	21.8232
1899-12-31 15:17:52	0.207975	0.208305	2.76296	5.24184	13.3424	13.3645	17.8648	22.0944	33.1748	37.943	43.7269	41.904	41.9946	42.126	39.6596	28.1818	9.28805	21.8326
1899-12-31 15:17:52	0.208197	0.208644	2.76399	5.24395	13.3467	13.3681	17.8711	22.1015	33.1866	37.9563	43.7482	41.9245	42.0133	42.146	39.6811	28.1987	9.2951	21.8456
1899-12-31 15:17:53	0.207991	0.209005	2.76502	5.24579	13.3504	13.3714	17.8752	22.1065	33.1933	37.964	43.7544	41.9353	42.0218	42.153	39.6858	28.2008	9.29667	21.8467
1899-12-31 15:17:54	0.208407	0.207971	2.76628	5.24731	13.3546	13.3756	17.8795	22.1128	33.2038	37.9745	43.7657	41.9468	42.0361	42.1661	39.7007	28.2123	9.30198	21.8561
1899-12-31 15:17:55	0.208611	0.209479	2.76716	5.2491	13.3585	13.3793	17.885	22.1186	33.2111	37.9858	43.7785	41.9648	42.0544	42.1778	39.7216	28.2312	9.30836	21.8711
1899-12-31 15:17:56	0.208392	0.208747	2.7683	5.25007	13.3599	13.3812	17.8846	22.1174	33.2126	37.9789	43.7682	41.9463	42.0347	42.1503	39.6996	28.2136	9.30383	21.8577
1899-12-31 15:17:57	0.208697	0.209548	2.7688	5.25118	13.362	13.3828	17.8843	22.1164	33.2087	37.9754	43.7592	41.9402	42.0254	42.1406	39.6916	28.2102	9.30326	21.8562
1899-12-31 15:17:58	0.20898	0.208865	2.76955	5.25251	13.364	13.3845	17.8853	22.1174	33.2082	37.9722	43.7563	41.9333	42.0224	42.1351	39.6877	28.2104	9.30365	21.8568
1899-12-31 15:17:59	0.209157	0.209951	2.77081	5.25388	13.3667	13.3872	17.8871	22.1185	33.207	37.9722	43.7537	41.9335	42.0186	42.1335	39.6877	28.214	9.30585	21.8608
1899-12-31 15:19:15	0.217387	0.222608	2.84771	5.38143	13.6072	13.6283	18.1429	22.4099	33.6054	38.3849	44.1746	42.3298	42.4225	42.549	40.0571	28.5048	9.45973	22.0934
1899-12-31 15:19:16	0.218551	0.217927	2.85017	5.38247	13.6092	13.6308	18.1421	22.4049	33.6018	38.3692	44.1434	42.2992	42.3835	42.5026	40.0206	28.4736	9.44876	22.0719
1899-12-31 15:19:17	0.218634	0.218714	2.85145	5.38394	13.6107	13.6332	18.14	22.3995	33.5963	38.3546	44.1209	42.2806	42.3657	42.4801	40.0094	28.4761	9.45172	22.0796
1899-12-31 15:19:18	0.218876	0.218129	2.85198	5.38492	13.6109	13.6322	18.1348	22.3906	33.5748	38.3286	44.0847	42.2462	42.3247	42.4437	39.9735	28.458	9.4457	22.0677
1899-12-31 15:19:19	0.218967	0.218827	2.8523	5.38592	13.61	13.6315	18.1305	22.3825	33.5655	38.3087	44.0523	42.2148	42.2956	42.415	39.9515	28.456	9.4477	22.07
1899-12-31 15:19:20	0.218715	0.219279	2.85325	5.38642	13.6096	13.6309	18.1237	22.3737	33.5448	38.2833	44.0217	42.1782	42.2606	42.3711	39.9223	28.4461	9.44436	22.0667
1899-12-31 15:19:21	0.218836	0.21999	2.85357	5.38647	13.6078	13.6301	18.117	22.363	33.5277	38.2528	43.9797	42.1363	42.2161	42.3354	39.8784	28.421	9.4371	22.0512
1899-12-31 15:19:22	0.219354	0.219151	2.85387	5.38719	13.6071	13.6274	18.112	22.3533	33.5106	38.2293	43.9425	42.0956	42.1831	42.2993	39.846	28.4049	9.43364	22.0443
1899-12-31 15:19:23	0.219306	0.218801	2.85515	5.38801	13.6062	13.6283	18.1084	22.3457	33.4952	38.2089	43.9154	42.0696	42.1504	42.2699	39.8202	28.3935	9.43181	22.0378
1899-12-31 15:19:24	0.219353	0.21907	2.85555	5.38895	13.6075	13.6298	18.1047	22.3401	33.4835	38.1926	43.894	42.0433	42.1234	42.2404	39.7957	28.3784	9.42813	22.0304
1899-12-31 15:19:25	0.219086	0.220058	2.85627	5.39027	13.6093	13.6327	18.105	22.3389	33.4836	38.1873	43.8826	42.0353	42.1145	42.2314	39.7911	28.3819	9.42982	22.0346
1899-12-31 15:19:26	0.219735	0.219477	2.85692	5.39149	13.6103	13.6325	18.1034	22.3371	33.4762	38.1769	43.8681	42.0153	42.0944	42.2105	39.7659	28.3643	9.42467	22.0205
1899-12-31 15:19:27	0.219495	0.219765	2.8581	5.39296	13.6137	13.6349	18.1067	22.3384	33.4788	38.178	43.8679	42.0137	42.094	42.2112	39.7663	28.3658	9.42587	22.0224
1899-12-31 15:19:28	0.219576	0.219806	2.85895	5.39461	13.6164	13.6378	18.1096	22.3415	33.4841	38.1814	43.8731	42.0187	42.0981	42.2152	39.7709	28.3695	9.42764	22.0257
1899-12-31 15:19:29	0.219875	0.220508	2.86031	5.39649	13.6197	13.6408	18.1119	22.3462	33.4898	38.188	43.8809	42.0249	42.1067	42.2222	39.7799	28.3769	9.43012	22.0315
1899-12-31 15:19:30	0.220313	0.220409	2.86114	5.39774	13.6225	13.645	18.1157	22.348	33.4905	38.1906	43.8819	42.0274	42.1075	42.2221	39.7797	28.3755	9.4296	22.0305
1899-12-31 15:19:31	0.22009	0.220404	2.86234	5.39979	13.6261	13.6488	18.1208	22.3553	33.5035	38.2008	43.8932	42.0406	42.1244	42.2419	39.7952	28.3881	9.43336	22.0393
1899-12-31 15:19:32	0.220305	0.220644	2.86314	5.40191	13.6302	13.6515	18.1259	22.3618	33.5078	38.2124	43.9068	42.0531	42.1373	42.258	39.8043	28.392	9.43557	22.0418
1899-12-31 15:19:33	0.220082	0.22119	2.86425	5.40397	13.636	13.6581	18.1342	22.3719	33.526	38.2333	43.9311	42.0799	42.1675	42.2855	39.8334	28.4125	9.44426	22.0552
1899-12-31 15:19:34	0.220516	0.220727	2.86608	5.40679	13.6405	13.6635	18.143	22.3826	33.5432	38.2545	43.9585	42.1073	42.1913	42.3135	39.856	28.4234	9.44951	22.0618
1899-12-31 15:19:35	0.220766	0.221503	2.86736	5.40863	13.6463	13.6676	18.1511	22.3939	33.5591	38.2768	43.9879	42.134	42.2109	42.3338	39.875	28.4297	9.45123	22.0634
1899-12-31 15:19:36	0.220383	0.219989	2.86877	5.4109	13.6527	13.6756	18.1629	22.4095	33.5874	38.3076	44.0229	42.172	42.2523	42.3721	39.9082	28.4457	9.4566	22.0722
1899-12-31 15:19:37	0.22087	0.220149	2.87058	5.41407	13.6605	13.6833	18.1758	22.4273	33.6153	38.3438	44.0675	42.2211	42.3006	42.4161	39.9485	28.4644	9.46265	22.0831
1899-12-31 15:19:38	0.221408	0.220883	2.87166	5.41714	13.6683	13.6908	18.1904	22.4465	33.6472	38.382	44.1178	42.2649	42.3475	42.4704	39.9851	28.4774	9.46551	22.0881
1899-12-31 15:19:39	0.221307	0.220969	2.87347	5.42041	13.6776	13.7005	18.2071	22.4702	33.6854	38.4313	44.184	42.3266	42.4164	42.5332	40.0438	28.5063	9.47523	22.1065
1899-12-31 15:19:39	0.221215	0.222635	2.87521	5.42333	13.687	13.7093	18.2239	22.4934	33.7207	38.481	44.243	42.3957	42.4787	42.5946	40.0961	28.5286	9.48197	22.1186
1899-12-31 15:19:40	0.221801	0.222518	2.87727	5.42676	13.6966	13.7197	18.2427	22.5188	33.7636	38.5363	44.3147	42.4666	42.5507	42.6706	40.1609	28.5637	9.49328	22.1418
1899-12-31 15:19:41	0.221547	0.221959	2.87893	5.42967	13.7051	13.7273	18.2583	22.5393	33.7992	38.5799	44.376	42.523	42.606	42.7308	40.2061	28.5823	9.49848	22.1511
1899-12-31 15:19:42	0.221779	0.221962	2.88049	5.43336	13.7129	13.736	18.2729	22.5585	33.8281	38.6196	44.4295	42.5689	42.6568	42.7791	40.2485	28.6002	9.50397	22.1622
1899-12-31 15:19:43	0.221814	0.222168	2.88205	5.43628	13.721	13.7433	18.2867	22.5781	33.8602	38.659	44.4769	42.6193	42.707	42.8386	40.2962	28.626	9.51236	22.1793
1899-12-31 15:19:44	0.222246	0.222722	2.88378	5.43865	13.7282	13.7498	18.2988	22.5962	33.8867	38.6946	44.5262	42.6702	42.7577	42.8815	40.3393	28.6498	9.5204	22.1946
1899-12-31 15:19:45	0.222483	0.223162	2.88529	5.44169	13.7357	13.7576	18.3121	22.6131	33.9128	38.7307	44.5687	42.7154	42.8093	42.9231	40.3868	28.6789	9.53087	22.2152
1899-12-31 15:19:46	0.222539	0.223171	2.88629	5.44408	13.7416	13.7647	18.3229	22.6268	33.9383	38.7578	44.609	42.7515	42.8445	42.9641	40.4215	28.7009	9.53859	22.2295
1899-12-31 15:19:47	0.222773	0.222264	2.88803	5.44658	13.7473	13.7713	18.3327	22.6399	33.959	38.7851	44.648	42.7901	42.8826	42.9979	40.4551	28.7234	9.54482	22.2434
1899-12-31 15:19:48	0.223106	0.223107	2.88926	5.44831	13.7526	13.7761	18.3407	22.6509	33.9772	38.8083	44.679	42.8146	42.9062	43.0285	40.4765	28.7311	9.54827	22.2482
1899-12-31 15:19:49	0.223148	0.223287	2.89031	5.45089	13.7574	13.7816	18.3499	22.6608	33.9905	38.8269	44.7021	42.8403	42.9282	43.056	40.4954	28.7376	9.55242	22.2506
1899-12-31 15:19:50	0.223121	0.223819	2.89187	5.45321	13.7636	13.7873	18.3579	22.6738	34.0094	38.8532	44.7358	42.8716	42.968	43.0947	40.5309	28.7561	9.55978	22.2664
1899-12-31 15:19:51	0.223468	0.224096	2.89277	5.45539	13.7686	13.7922	18.367	22.6856	34.0285	38.8753	44.7586	42.8985	42.9923	43.1178	40.5515	28.7667	9.56376	22.2718
1899-12-31 15:19:52	0.223574	0.224043	2.89443	5.45783	13.7749	13.7983	18.3777	22.6992	34.0498	38.9033	44.7974	42.9388	43.0297	43.1545	40.587	28.787	9.56992	22.2832
1899-12-31 15:19:53	0.223666	0.223543	2.89566	5.46036	13.7808	13.805	18.3875	22.7129	34.0783	38.9303	44.8283	42.9706	43.0671	43.1816	40.614	28.7958	9.5729	22.2879
1899-12-31 15:19:54	0.223628	0.223311	2.89725	5.46299	13.7873	13.8116	18.4002	22.7299	34.099	38.9668	44.8737	43.0158	43.1133	43.2272	40.6548	28.8186	9.58064	22.3056
1899-12-31 15:19:55	0.224366	0.224573	2.89881	5.46519	13.7951	13.8187	18.4123	22.7464	34.1304	39.0014	44.9148	43.0574	43.1542	43.2778	40.695	28.8373	9.58621	22.3156
1899-12-31 15:19:56	0.224244	0.224157	2.90059	5.46849	13.8028	13.8252	18.4256	22.763	34.1605	39.0356	44.9647	43.1049	43.1969	43.3167	40.7278	28.8494	9.59071	22.3229
1899-12-31 15:19:57	0.224247	0.224628	2.90177	5.47118	13.8104	13.8321	18.4388	22.7817	34.1881	39.075	45.0119	43.1541	43.2462	43.3689	40.7709	28.8705	9.59862	22.3342
1899-12-31 15:19:58	0.22473	0.225085	2.90343	5.47378	13.817	13.8407	18.4512	22.7986	34.2171	39.1078	45.0528	43.193	43.2868	43.4154	40.8013	28.8817	9.60348	22.3395
1899-12-31 15:19:59	0.224118	0.224765	2.90476	5.47677	13.8248	13.848	18.4656	22.8172	34.2435	39.1478	45.101	43.253	43.3374	43.4695	40.8517	28.9082	9.61224	22.358
1899-12-31 15:21:15	0.23643	0.239286	3.01323	5.66143	14.2808	14.3057	19.2001	23.8019	35.7806	41.0981	47.504	45.6343	45.704	45.8484	42.8761	29.9191	9.98171	22.9889
1899-12-31 15:21:16	0.236231	0.236148	3.014	5.66508	14.2876	14.3132	19.2078	23.8117	35.8118	41.1181	47.5425	45.657	45.7378	45.883	42.9027	29.9398	9.98682	22.9998
1899-12-31 15:21:17	0.236386	0.236103	3.01617	5.66818	14.294	14.3199	19.2172	23.8227	35.8272	41.134	47.5601	45.6714	45.753	45.8967	42.9095	29.9365	9.98661	22.9958
1899-12-31 15:21:18	0.236887	0.236808	3.01689	5.67039	14.2987	14.3236	19.2231	23.829	35.8341	41.1462	47.5737	45.6791	45.7634	45.9076	42.9176	29.9427	9.98925	22.9992
1899-12-31 15:21:19	0.236778	0.236877	3.01832	5.67229	14.3032	14.3282	19.2295	23.8371	35.844	41.1589	47.5882	45.6955	45.7797	45.9243	42.9319	29.9517	9.99273	23.0055
1899-12-31 15:21:20	0.23704	0.237046	3.01927	5.67427	14.3078	14.3333	19.235	23.8447	35.8596	41.172	47.5995	45.7072	45.7938	45.9362	42.9401	29.9548	9.99491	23.0071
1899-12-31 15:21:20	0.237046	0.236314	3.02092	5.67682	14.3135	14.3382	19.244	23.8556	35.8761	41.1938	47.631	45.7365	45.8167	45.9716	42.9684	29.9739	10.0012	23.0213
1899-12-31 15:21:21	0.237525	0.23696	3.02228	5.67922	14.3188	14.3436	19.2524	23.8648	35.8952	41.2103	47.6521	45.7594	45.8361	45.9918	42.9863	29.9858	10.0059	23.0284
1899-12-31 15:21:22	0.237859	0.237625	3.02366	5.68111	14.3237	14.3492	19.2593	23.8753	35.9131	41.2297	47.6779	45.7818	45.8606	46.0162	43.0053	29.9948	10.009	23.0351
1899-12-31 15:21:23	0.237674	0.237778	3.02536	5.68368	14.3288	14.3542	19.2676	23.8863	35.9321	41.2485	47.7022	45.8035	45.8832	46.0346	43.0238	30.0033	10.0124	23.0414
1899-12-31 15:21:24	0.238058	0.237663	3.02626	5.68604	14.335	14.3605	19.2774	23.8983	35.9506	41.2745	47.7349	45.8399	45.9228	46.0673	43.0576	30.0257	10.019	23.0577
1899-12-31 15:21:25	0.23779	0.238196	3.02762	5.68765	14.3404	14.3656	19.2846	23.9083	35.9662	41.2918	47.7524	45.8575	45.9386	46.0792	43.0712	30.0296	10.0194	23.0588
1899-12-31 15:21:26	0.237872	0.238156	3.02915	5.69022	14.3458	14.3713	19.2945	23.9204	35.9845	41.3148	47.7781	45.8836	45.9675	46.1105	43.0944	30.042	10.0226	23.0656
1899-12-31 15:21:27	0.237997	0.238694	3.0303	5.69225	14.3501	14.3745	19.3005	23.9274	35.9943	41.3274	47.7913	45.8909	45.9768	46.1125	43.0966	30.0373	10.0232	23.0612
1899-12-31 15:21:28	0.238209	0.238593	3.03137	5.69456	14.3559	14.379	19.3077	23.937	36.0061	41.3431	47.8081	45.908	45.9913	46.138	43.106	30.0381	10.0235	23.06
1899-12-31 15:21:29	0.238432	0.238052	3.03303	5.69723	14.3611	14.3859	19.3173	23.9492	36.028	41.3669	47.8354	45.941	46.0231	46.1679	43.1334	30.0577	10.0305	23.0741
1899-12-31 15:21:30	0.238594	0.238516	3.03461	5.69943	14.3674	14.3929	19.3265	23.9598	36.0484	41.3889	47.8625	45.9669	46.0537	46.194	43.1573	30.0698	10.0364	23.0836
1899-12-31 15:21:31	0.238836	0.239015	3.03558	5.70205	14.3717	14.3977	19.3344	23.9699	36.0628	41.4064	47.89	45.99	46.0774	46.22	43.1796	30.0851	10.0425	23.0967
1899-12-31 15:21:32	0.238814	0.238862	3.03689	5.70354	14.3762	14.4022	19.3387	23.9769	36.0736	41.4161	47.8982	45.9979	46.0833	46.2282	43.1823	30.0838	10.0424	23.0945
1899-12-31 15:21:33	0.238736	0.238414	3.03789	5.70519	14.3799	14.4069	19.3449	23.9816	36.0796	41.4256	47.9065	46.0056	46.092	46.2366	43.1868	30.0828	10.0422	23.0926
1899-12-31 15:21:34	0.239162	0.239179	3.03929	5.70735	14.3842	14.4093	19.352	23.9911	36.0912	41.4418	47.9305	46.0266	46.1146	46.2626	43.2097	30.0996	10.0482	23.1063
1899-12-31 15:21:35	0.239317	0.238981	3.04057	5.70942	14.388	14.4138	19.3567	23.9959	36.0968	41.4504	47.9369	46.0303	46.1193	46.2615	43.2092	30.0961	10.0463	23.1024
1899-12-31 15:21:36	0.239345	0.238478	3.04192	5.71177	14.3931	14.4196	19.3648	24.0071	36.111	41.4708	47.9685	46.0613	46.1486	46.2912	43.242	30.1213	10.0545	23.1198
1899-12-31 15:21:37	0.239411	0.238622	3.04285	5.71363	14.3975	14.4241	19.3703	24.0143	36.1204	41.4833	47.9841	46.0752	46.1599	46.3066	43.2527	30.1273	10.0572	23.1234
1899-12-31 15:21:38	0.239486	0.239387	3.0446	5.71582	14.4021	14.4282	19.3785	24.0227	36.1346	41.4979	48.0027	46.0925	46.1752	46.326	43.2703	30.138	10.062	23.1307
1899-12-31 15:21:39	0.239874	0.24002	3.04591	5.71761	14.407	14.4337	19.3826	24.03	36.1468	41.5106	48.0184	46.1087	46.1913	46.3385	43.285	30.1452	10.0662	23.1357
1899-12-31 15:21:40	0.239856	0.240248	3.0463	5.71968	14.411	14.4358	19.3874	24.0365	36.1565	41.5215	48.031	46.1172	46.2017	46.3534	43.2904	30.1466	10.0665	23.1359
1899-12-31 15:21:41	0.239982	0.240612	3.04808	5.722	14.4167	14.4426	19.399	24.0475	36.1813	41.5443	48.0576	46.1509	46.2321	46.3764	43.3215	30.1666	10.075	23.1532
1899-12-31 15:21:42	0.240348	0.238852	3.04916	5.72409	14.4216	14.4468	19.4045	24.0555	36.1869	41.5559	48.0696	46.1596	46.2448	46.3866	43.3287	30.1671	10.0747	23.1529
1899-12-31 15:21:43	0.240201	0.239696	3.05051	5.72617	14.426	14.4519	19.4092	24.0615	36.2023	41.5659	48.0787	46.1705	46.2537	46.3927	43.332	30.165	10.074	23.1502
1899-12-31 15:21:44	0.240434	0.240887	3.05189	5.72828	14.4303	14.4558	19.4149	24.0691	36.2147	41.5787	48.0883	46.1819	46.266	46.402	43.3372	30.1658	10.0748	23.148
1899-12-31 15:21:45	0.240524	0.241824	3.05309	5.73072	14.4356	14.4613	19.4244	24.0809	36.2329	41.5992	48.1169	46.204	46.2898	46.4314	43.3585	30.1785	10.0786	23.1568
1899-12-31 15:21:46	0.241027	0.24111	3.05442	5.73292	14.4418	14.4677	19.4325	24.0904	36.2434	41.6179	48.138	46.2222	46.3072	46.4499	43.3708	30.1837	10.0797	23.1597
1899-12-31 15:21:47	0.240986	0.240645	3.05605	5.73479	14.4461	14.473	19.4382	24.0979	36.2553	41.6279	48.1454	46.229	46.309	46.447	43.3673	30.1727	10.0774	23.1495
1899-12-31 15:21:48	0.241294	0.24144	3.05738	5.73816	14.4537	14.4801	19.4526	24.1154	36.2769	41.6638	48.1941	46.2752	46.3578	46.5063	43.4138	30.2046	10.0885	23.1726
1899-12-31 15:21:49	0.24157	0.241727	3.05904	5.74049	14.4604	14.4855	19.4622	24.1291	36.2987	41.6898	48.2277	46.3076	46.3948	46.5364	43.4422	30.2195	10.0936	23.1829
1899-12-31 15:21:50	0.241629	0.242431	3.06006	5.74275	14.4668	14.4906	19.4716	24.1403	36.3183	41.7129	48.2581	46.3329	46.4211	46.5602	43.4643	30.2292	10.0973	23.1892
1899-12-31 15:21:51	0.241662	0.242141	3.06144	5.74524	14.4712	14.4966	19.4785	24.1503	36.3308	41.7292	48.2759	46.3509	46.4412	46.58	43.4748	30.2348	10.0991	23.1915
1899-12-31 15:21:52	0.242012	0.241212	3.06264	5.74769	14.4765	14.5016	19.4868	24.1606	36.347	41.7481	48.3014	46.372	46.4634	46.6011	43.4901	30.2429	10.1023	23.1963
1899-12-31 15:21:53	0.242323	0.242472	3.06404	5.74919	14.4802	14.5068	19.4916	24.1673	36.3574	41.7584	48.3137	46.3796	46.4703	46.6138	43.4961	30.2434	10.1026	23.1953
1899-12-31 15:21:54	0.242025	0.242234	3.06525	5.75112	14.4846	14.5105	19.4981	24.1737	36.3714	41.7696	48.3256	46.3951	46.4815	46.6259	43.5074	30.2486	10.1041	23.1996
1899-12-31 15:21:55	0.242516	0.242604	3.06594	5.75299	14.4881	14.5137	19.5021	24.1795	36.3782	41.7803	48.3375	46.408	46.4918	46.6407	43.5217	30.2612	10.1075	23.2079
1899-12-31 15:21:56	0.242335	0.242976	3.0673	5.75458	14.4914	14.5175	19.5066	24.1833	36.3834	41.7855	48.3449	46.4166	46.498	46.6501	43.5307	30.2706	10.1127	23.2159
1899-12-31 15:21:57	0.242131	0.242304	3.06809	5.75597	14.4926	14.518	19.5049	24.1808	36.3795	41.7756	48.3278	46.3976	46.4832	46.6291	43.5113	30.2557	10.1093	23.2061
1899-12-31 15:21:58	0.242625	0.242835	3.06899	5.75713	14.4942	14.5199	19.5057	24.1807	36.3727	41.7736	48.3254	46.394	46.4807	46.6285	43.5115	30.2613	10.1123	23.2106
1899-12-31 15:21:59	0.24271	0.243688	3.06977	5.7583	14.4951	14.5205	19.5042	24.1788	36.3719	41.7642	48.3121	46.3826	46.4698	46.6128	43.4993	30.2547	10.1123	23.209
1899-12-31 15:22:00	0.242975	0.242816	3.07044	5.7595	14.4968	14.5223	19.5045	24.176	36.3666	41.7558	48.2992	46.3673	46.454	46.5938	43.4865	30.2487	10.1114	23.2045
1899-12-31 15:23:15	0.253553	0.252074	3.16567	5.91439	14.834	14.8626	19.972	24.7566	37.2299	42.7824	49.491	47.5165	47.5937	47.7552	44.4414	30.7763	10.3507	23.5636
1899-12-31 15:23:16	0.25436	0.254416	3.16594	5.91777	14.844	14.8714	19.9883	24.7821	37.2808	42.8181	49.5498	47.5712	47.6543	47.8017	44.4923	30.7975	10.3612	23.579
1899-12-31 15:23:17	0.254254	0.254615	3.16873	5.92297	14.8589	14.8855	20.0155	24.8191	37.3451	42.8177	49.6504	47.6644	47.7436	47.893	44.5761	30.8391	10.3759	23.6075
1899-12-31 15:23:18	0.254488	0.254606	3.17076	5.92652	14.8698	14.8963	20.0363	24.8466	37.3859	42.8695	49.7193	47.7377	47.82	47.9719	44.6398	30.8757	10.3885	23.6321
1899-12-31 15:23:19	0.255069	0.255812	3.17244	5.93037	14.8789	14.9059	20.0536	24.8705	37.4281	42.9071	49.7699	47.7933	47.8715	48.0285	44.6822	30.895	10.3949	23.6432
1899-12-31 15:23:20	0.255115	0.254857	3.1744	5.93358	14.888	14.9163	20.069	24.8918	37.4665	42.934	49.8218	47.8408	47.9211	48.0737	44.7204	30.9111	10.4003	23.6508
1899-12-31 15:23:21	0.255027	0.255821	3.17613	5.93666	14.8973	14.9243	20.085	24.9136	37.4989	42.9741	49.8767	47.8953	47.9775	48.1258	44.7623	30.928	10.4054	23.6602
1899-12-31 15:23:22	0.25544	0.255316	3.17845	5.94012	14.9051	14.9334	20.1018	24.9329	37.5273	43.0204	49.9252	47.9427	48.0246	48.168	44.7929	30.9412	10.4107	23.6665
1899-12-31 15:23:23	0.255581	0.255082	3.17975	5.94315	14.9136	14.9405	20.1135	24.9522	37.5562	43.0681	49.9741	47.9844	48.0603	48.2133	44.8243	30.9514	10.4148	23.6709
1899-12-31 15:23:24	0.255741	0.256345	3.18158	5.94637	14.9221	14.9497	20.1295	24.973	37.5901	43.1044	50.0291	48.0336	48.1099	48.2655	44.867	30.9751	10.4218	23.6837
1899-12-31 15:23:25	0.25594	0.256046	3.18329	5.94945	14.9299	14.9575	20.1441	24.9925	37.6224	43.1531	50.0711	48.0824	48.1582	48.3133	44.9062	30.9931	10.4284	23.6954
1899-12-31 15:23:26	0.255626	0.25571	3.18509	5.95267	14.9385	14.9656	20.1579	25.0116	37.6482	43.191	50.1099	48.1258	48.2051	48.3569	44.9441	31.0091	10.4328	23.7046
1899-12-31 15:23:27	0.255997	0.256705	3.18687	5.95528	14.9451	14.9722	20.1692	25.0263	37.6706	43.2227	50.1441	48.1583	48.2334	48.39	44.9694	31.0173	10.4357	23.7093
1899-12-31 15:23:28	0.256252	0.256743	3.18797	5.95739	14.9514	14.9773	20.1785	25.0383	37.6841	43.2447	50.1699	48.1815	48.253	48.4081	44.9826	31.0196	10.4356	23.7082
1899-12-31 15:23:29	0.256617	0.256501	3.18981	5.96034	14.9583	14.9852	20.1909	25.056	37.7149	43.2853	50.2203	48.2276	48.3058	48.4582	45.0283	31.0499	10.4477	23.7307
1899-12-31 15:23:30	0.256461	0.256541	3.19093	5.9629	14.9648	14.9918	20.1997	25.0679	37.7309	43.3122	50.2479	48.2562	48.3358	48.4918	45.0527	31.0668	10.4524	23.7434
1899-12-31 15:23:31	0.257145	0.257279	3.19251	5.9648	14.9697	14.9968	20.2078	25.0775	37.7466	43.3298	50.274	48.2829	48.3629	48.5117	45.0758	31.0828	10.4588	23.7578
1899-12-31 15:23:32	0.256908	0.257821	3.19354	5.96628	14.9713	14.9987	20.2088	25.0772	37.748	43.3246	50.2642	48.2682	48.3452	48.5036	45.0576	31.0687	10.4552	23.7445
1899-12-31 15:23:33	0.257268	0.257548	3.19408	5.96749	14.9733	14.9995	20.2079	25.0752	37.7394	43.3143	50.2459	48.2516	48.3274	48.4811	45.0406	31.0588	10.4532	23.7378
1899-12-31 15:23:34	0.257324	0.256808	3.1947	5.96867	14.9724	14.9999	20.2032	25.0675	37.725	43.2917	50.2179	48.2203	48.2935	48.4535	45.0135	31.0399	10.4483	23.7236
1899-12-31 15:23:35	0.257421	0.257665	3.19535	5.96929	14.9735	15.0006	20.2016	25.0634	37.7203	43.2796	50.2034	48.2081	48.282	48.4372	45.0121	31.0493	10.4525	23.7339
1899-12-31 15:23:36	0.257564	0.258639	3.19637	5.96991	14.9717	14.9977	20.1939	25.0508	37.6979	43.2472	50.1622	48.1684	48.2419	48.4012	44.9777	31.0338	10.4484	23.7241
1899-12-31 15:23:37	0.257833	0.257392	3.19697	5.96993	14.9698	14.9967	20.1857	25.0378	37.678	43.2166	50.1187	48.1259	48.2073	48.3576	44.9438	31.0205	10.4456	23.7177
1899-12-31 15:23:38	0.257532	0.258185	3.19663	5.97004	14.9667	14.9935	20.175	25.0227	37.6536	43.1741	50.079	48.0827	48.1608	48.3152	44.9099	31.0087	10.4436	23.714
1899-12-31 15:23:39	0.25781	0.258153	3.19682	5.97011	14.9625	14.9912	20.1643	25.0056	37.6271	43.129	50.0325	48.0312	48.1088	48.2564	44.8695	30.9942	10.4413	23.7082
1899-12-31 15:23:40	0.258329	0.256892	3.19681	5.96929	14.9573	14.9843	20.1467	24.9799	37.5868	43.0715	49.953	47.9558	48.0339	48.1822	44.7988	30.957	10.4307	23.6822
1899-12-31 15:23:41	0.257883	0.257431	3.19708	5.96927	14.9544	14.9818	20.1373	24.9642	37.5563	43.0311	49.9028	47.912	47.9938	48.1397	44.7713	30.9522	10.4296	23.6857
1899-12-31 15:23:42	0.258066	0.258574	3.19715	5.96887	14.9504	14.9775	20.1243	24.947	37.5284	42.986	49.8465	47.8575	47.9383	48.0871	44.7332	30.9415	10.4273	23.6833
1899-12-31 15:23:43	0.257684	0.258318	3.19762	5.96861	14.9465	14.9733	20.1118	24.9262	37.4961	42.9394	49.782	47.7943	47.8698	48.0213	44.6794	30.9181	10.4232	23.6709
1899-12-31 15:23:44	0.258419	0.257502	3.19735	5.9689	14.9428	14.9687	20.099	24.9096	37.4659	42.8982	49.7331	47.7402	47.8233	47.9658	44.6393	30.9016	10.422	23.6643
1899-12-31 15:23:45	0.258774	0.258142	3.19765	5.96907	14.94	14.9671	20.0906	24.896	37.4447	42.8815	49.6956	47.7039	47.7817	47.9281	44.6116	30.8927	10.4213	23.6611
1899-12-31 15:23:46	0.258417	0.25877	3.19829	5.96914	14.9386	14.9637	20.0822	24.8842	37.4227	42.8591	49.6579	47.6647	47.7406	47.8945	44.582	30.8816	10.42	23.6557
1899-12-31 15:23:47	0.258555	0.258555	3.19871	5.96955	14.9368	14.9642	20.0752	24.8717	37.3926	42.832	49.6195	47.6203	47.6986	47.8524	44.5393	30.8573	10.4118	23.6386
1899-12-31 15:23:48	0.258714	0.25853	3.19936	5.97054	14.9366	14.9647	20.0727	24.8668	37.388	42.8157	49.6005	47.6073	47.6836	47.8333	44.5287	30.8565	10.4121	23.6394
1899-12-31 15:23:49	0.258721	0.257741	3.20031	5.97182	14.9378	14.9648	20.0698	24.8636	37.3779	42.8069	49.5842	47.5928	47.6716	47.8237	44.5183	30.8523	10.4124	23.6386
1899-12-31 15:23:50	0.258784	0.258271	3.20108	5.97271	14.9397	14.9663	20.0717	24.8644	37.3769	42.8093	49.5852	47.5923	47.6703	47.816	44.519	30.8581	10.4149	23.644
1899-12-31 15:23:51	0.259183	0.259215	3.2018	5.97408	14.9422	14.9693	20.0725	24.8638	37.3822	42.8105	49.5817	47.5866	47.6663	47.8136	44.5122	30.8524	10.4141	23.6399
1899-12-31 15:23:51	0.25932	0.258453	3.20277	5.97636	14.9453	14.9704	20.0752	24.868	37.3854	42.8127	49.5805	47.5872	47.6655	47.8138	44.5107	30.8518	10.4143	23.6397
1899-12-31 15:23:52	0.259516	0.259509	3.2039	5.97789	14.9503	14.9771	20.082	24.8764	37.3997	42.8259	49.6027	47.6053	47.6834	47.8302	44.5305	30.8649	10.4193	23.649
1899-12-31 15:23:53	0.259367	0.259366	3.20535	5.98019	14.9546	14.9811	20.0902	24.8851	37.4166	42.8425	49.6243	47.6232	47.6997	47.8536	44.5462	30.8704	10.4219	23.6538
1899-12-31 15:23:54	0.259724	0.259475	3.20663	5.98223	14.9598	14.9869	20.0983	24.8958	37.4327	42.8552	49.6458	47.6456	47.723	47.8729	44.5636	30.8806	10.4266	23.6593
1899-12-31 15:23:55	0.26023	0.259714	3.20796	5.98448	14.9655	14.9913	20.1063	24.9076	37.4539	42.8738	49.6708	47.68	47.7559	47.9061	44.5954	30.8981	10.4358	23.6733
1899-12-31 15:23:56	0.260266	0.25978	3.20913	5.98647	14.9707	14.9969	20.1144	24.9173	37.4692	42.8823	49.6926	47.6987	47.778	47.9282	44.6125	30.9085	10.44	23.6794
1899-12-31 15:23:57	0.260145	0.259732	3.21076	5.98868	14.9748	15.0014	20.1235	24.9275	37.4857	42.9041	49.7164	47.7257	47.8037	47.9522	44.6333	30.9197	10.4441	23.6878
1899-12-31 15:23:58	0.260538	0.259949	3.21224	5.99115	14.9814	15.0078	20.1313	24.9394	37.5012	42.9144	49.7434	47.7514	47.8306	47.9835	44.6581	30.9354	10.4478	23.6976
1899-12-31 15:23:59	0.260355	0.260398	3.21334	5.99325	14.986	15.0115	20.1391	24.9485	37.5128	42.9319	49.7602	47.7687	47.8466	47.9976	44.6669	30.9355	10.4473	23.6948
1899-12-31 15:25:15	0.270922	0.272433	3.29425	6.12165	15.2241	15.2502	20.3848	25.2222	37.8742	43.3386	50.0952	48.0882	48.1702	48.3155	44.9483	31.1498	10.592	23.8826
1899-12-31 15:25:16	0.271334	0.271033	3.29578	6.1232	15.2264	15.2531	20.3887	25.2271	37.8892	43.3382	50.1119	48.0948	48.1728	48.3257	44.956	31.1542	10.5968	23.8826
1899-12-31 15:25:17	0.27141	0.272485	3.29757	6.12637	15.2327	15.2596	20.3994	25.2406	37.9114	43.3649	50.151	48.1342	48.2086	48.368	44.9972	31.1917	10.6115	23.9102
1899-12-31 15:25:18	0.271752	0.271608	3.29843	6.12791	15.2351	15.2618	20.401	25.2421	37.9121	43.3622	50.1524	48.1316	48.2065	48.3655	44.9939	31.1886	10.612	23.9086
1899-12-31 15:25:19	0.271771	0.271921	3.29976	6.12924	15.2378	15.2667	20.403	25.2417	37.9111	43.3559	50.1412	48.1228	48.1964	48.3529	44.9825	31.1759	10.6085	23.8981
1899-12-31 15:25:20	0.272011	0.271725	3.30094	6.13113	15.2416	15.2696	20.4072	25.2487	37.9216	43.3708	50.1548	48.1328	48.2077	48.3638	44.9915	31.1835	10.6102	23.9035
1899-12-31 15:25:21	0.272275	0.271932	3.3025	6.13391	15.2473	15.2756	20.4171	25.2601	37.9358	43.3933	50.1831	48.1617	48.2344	48.3914	45.0166	31.201	10.6179	23.9171
1899-12-31 15:25:22	0.272953	0.272358	3.30343	6.13593	15.2526	15.2806	20.4252	25.2709	37.9555	43.4068	50.2105	48.1874	48.2618	48.4151	45.0384	31.2132	10.6221	23.9255
1899-12-31 15:25:23	0.27283	0.272176	3.30497	6.13835	15.2588	15.286	20.4348	25.2826	37.9736	43.4275	50.2379	48.2104	48.2938	48.446	45.0623	31.2244	10.6267	23.9339
1899-12-31 15:25:24	0.272617	0.272851	3.30613	6.14042	15.2634	15.2913	20.4405	25.2895	37.9875	43.4393	50.2475	48.2171	48.2981	48.453	45.0612	31.2194	10.6259	23.9288
1899-12-31 15:25:25	0.272897	0.2723	3.30776	6.14293	15.269	15.2963	20.4504	25.3015	38.0031	43.4508	50.2758	48.2468	48.3268	48.4783	45.0851	31.2304	10.6295	23.9366
1899-12-31 15:25:26	0.273065	0.2728	3.3089	6.14512	15.2729	15.3006	20.4559	25.3094	38.0151	43.4652	50.2926	48.2595	48.3392	48.4908	45.0908	31.2314	10.6308	23.9358
1899-12-31 15:25:27	0.27305	0.273456	3.31033	6.14665	15.2779	15.3042	20.4601	25.3152	38.0241	43.4777	50.3016	48.2687	48.347	48.4947	45.0954	31.2329	10.6313	23.9363
1899-12-31 15:25:28	0.273259	0.272884	3.31126	6.14915	15.2823	15.3077	20.4674	25.3236	38.0335	43.4871	50.3214	48.2844	48.368	48.5176	45.1139	31.2478	10.6372	23.9471
1899-12-31 15:25:28	0.273618	0.273726	3.31252	6.15064	15.2854	15.3136	20.4708	25.3272	38.0445	43.4905	50.3278	48.2899	48.3722	48.5232	45.1196	31.2542	10.6398	23.9524
1899-12-31 15:25:29	0.273685	0.274053	3.3134	6.152	15.288	15.3146	20.4711	25.3253	38.0413	43.4935	50.3194	48.2841	48.3657	48.5161	45.1145	31.2537	10.6414	23.9531
1899-12-31 15:25:30	0.27377	0.273446	3.31395	6.15297	15.2874	15.315	20.4692	25.3212	38.0261	43.4723	50.2993	48.2622	48.3438	48.4865	45.095	31.2424	10.6391	23.9468
1899-12-31 15:25:31	0.273872	0.273258	3.3148	6.15422	15.289	15.3155	20.4665	25.3171	38.0231	43.4619	50.28	48.2419	48.3246	48.4743	45.0821	31.2378	10.6393	23.945
1899-12-31 15:25:32	0.27407	0.273417	3.31536	6.15471	15.2882	15.3156	20.461	25.3084	38.0041	43.4421	50.2466	48.2134	48.2905	48.4451	45.0556	31.2247	10.6365	23.9386
1899-12-31 15:25:33	0.274255	0.274074	3.31631	6.15542	15.2871	15.3148	20.456	25.3004	37.9918	43.4299	50.2207	48.187	48.2649	48.4211	45.0359	31.2212	10.637	23.9396
1899-12-31 15:25:34	0.27391	0.27421	3.31611	6.15592	15.2858	15.3136	20.4503	25.2909	37.9778	43.4134	50.186	48.1561	48.2324	48.3869	45.0146	31.219	10.6379	23.9417
1899-12-31 15:25:35	0.274346	0.274243	3.31663	6.1558	15.2818	15.3106	20.439	25.2741	37.9494	43.3759	50.1311	48.1064	48.1848	48.3363	44.9744	31.1986	10.6336	23.9292
1899-12-31 15:25:36	0.274299	0.273153	3.3165	6.15506	15.2765	15.3043	20.4245	25.2525	37.9092	43.3229	50.0677	48.0409	48.1198	48.2695	44.9205	31.1715	10.628	23.9134
1899-12-31 15:25:37	0.274174	0.274092	3.3163	6.15453	15.2719	15.2983	20.4098	25.2307	37.8739	43.271	50.0116	47.9757	48.0576	48.2115	44.867	31.1512	10.6237	23.902
1899-12-31 15:25:38	0.274397	0.273991	3.31592	6.15385	15.2651	15.2931	20.3935	25.2054	37.8347	43.2093	49.9398	47.9093	47.9925	48.1375	44.8139	31.134	10.6209	23.8942
1899-12-31 15:25:39	0.27442	0.273864	3.31609	6.15272	15.2592	15.2864	20.3752	25.1809	37.7892	43.152	49.8653	47.8401	47.9252	48.0707	44.7626	31.1183	10.618	23.8897
1899-12-31 15:25:40	0.274532	0.274371	3.31568	6.15163	15.2518	15.2796	20.3567	25.1541	37.7409	43.0908	49.7814	47.7652	47.8441	47.9979	44.708	31.0957	10.6146	23.879
1899-12-31 15:25:41	0.274532	0.273651	3.31548	6.15072	15.2467	15.2739	20.3418	25.1298	37.7008	43.0262	49.7163	47.6985	47.7807	47.9337	44.6584	31.0825	10.6113	23.875
1899-12-31 15:25:42	0.274467	0.274817	3.31535	6.14966	15.2399	15.2669	20.3226	25.1026	37.6543	42.9639	49.6422	47.6155	47.6968	47.8525	44.5915	31.0504	10.6023	23.8572
1899-12-31 15:25:43	0.274687	0.274456	3.31507	6.1491	15.2346	15.2604	20.3079	25.0823	37.6234	42.9137	49.5829	47.555	47.636	47.7871	44.5399	31.0299	10.5975	23.8452
1899-12-31 15:25:44	0.275128	0.273869	3.31539	6.14893	15.2315	15.2584	20.2977	25.0665	37.5984	42.8874	49.5357	47.5132	47.5996	47.7451	44.5101	31.0234	10.5972	23.8444
1899-12-31 15:25:45	0.275273	0.274565	3.31556	6.14924	15.2293	15.256	20.2872	25.0506	37.5708	42.8517	49.481	47.4617	47.5489	47.6969	44.4643	31.0019	10.5915	23.8304
1899-12-31 15:25:46	0.275217	0.275586	3.31617	6.1496	15.2274	15.2546	20.2815	25.0417	37.5537	42.8302	49.4475	47.4286	47.5159	47.6611	44.439	30.9941	10.5908	23.8281
1899-12-31 15:25:47	0.275638	0.274939	3.31669	6.15013	15.2262	15.2539	20.2777	25.0345	37.5384	42.8158	49.4211	47.4026	47.4864	47.6397	44.4209	30.9891	10.5905	23.8268
1899-12-31 15:25:48	0.27526	0.276451	3.3176	6.15127	15.2269	15.2528	20.2733	25.0283	37.526	42.8042	49.3906	47.3738	47.4571	47.6099	44.3886	30.9685	10.5845	23.8131
1899-12-31 15:25:49	0.275372	0.274525	3.31858	6.15218	15.2293	15.2561	20.2745	25.0293	37.5286	42.808	49.3915	47.375	47.4629	47.613	44.3958	30.9766	10.5878	23.8202
1899-12-31 15:25:50	0.275167	0.275127	3.31941	6.15456	15.2322	15.2593	20.2786	25.0334	37.5364	42.8074	49.3999	47.3842	47.467	47.6222	44.4044	30.9838	10.5914	23.8266
1899-12-31 15:25:51	0.276073	0.276197	3.32029	6.15619	15.2357	15.2625	20.2821	25.0389	37.541	42.8158	49.4133	47.3989	47.4764	47.6331	44.4144	30.9922	10.5949	23.8319
1899-12-31 15:25:52	0.275833	0.275567	3.32152	6.15763	15.2375	15.2642	20.284	25.039	37.5431	42.8184	49.4037	47.3884	47.4679	47.6228	44.4011	30.9796	10.5904	23.822
1899-12-31 15:25:53	0.275997	0.275578	3.32247	6.15904	15.2405	15.2669	20.2864	25.042	37.5484	42.8136	49.4062	47.3907	47.4686	47.6251	44.4003	30.9773	10.5917	23.8207
1899-12-31 15:25:54	0.276271	0.276354	3.32411	6.16083	15.2451	15.2719	20.2919	25.0486	37.5566	42.8288	49.4285	47.4079	47.4864	47.6424	44.4175	30.9897	10.5974	23.8293
1899-12-31 15:25:55	0.276322	0.276312	3.32489	6.16293	15.2501	15.2767	20.2988	25.0587	37.5738	42.8434	49.4513	47.4312	47.5155	47.6668	44.4418	31.0071	10.6044	23.8433
1899-12-31 15:25:56	0.276433	0.276507	3.32643	6.16455	15.2527	15.2798	20.303	25.0624	37.5775	42.8443	49.4518	47.4272	47.5094	47.6591	44.4314	30.9941	10.6011	23.8308
1899-12-31 15:25:57	0.276659	0.275547	3.3272	6.16686	15.2579	15.2841	20.3101	25.0713	37.5912	42.8635	49.475	47.4463	47.5332	47.679	44.4458	31.0009	10.6049	23.8347
1899-12-31 15:25:58	0.277132	0.277213	3.32874	6.16966	15.263	15.2903	20.3181	25.0824	37.6092	42.8788	49.4963	47.4692	47.554	47.7028	44.4641	31.0069	10.6079	23.8387
1899-12-31 15:25:59	0.277296	0.277257	3.3303	6.17194	15.2701	15.2971	20.3302	25.0979	37.63	42.9009	49.5396	47.5095	47.5953	47.7379	44.503	31.0274	10.6166	23.854
1899-12-31 15:26:00	0.277103	0.277845	3.33211	6.17485	15.278	15.3042	20.3427	25.1166	37.6575	42.9341	49.5882	47.5596	47.6362	47.7918	44.5452	31.0495	10.6242	23.8694
1899-12-31 15:27:16	0.291768	0.287626	3.43901	6.35468	15.6963	15.7235	20.9866	25.9502	38.9587	44.5599	51.4848	49.4033	49.4852	49.6433	46.0632	31.8056	10.9448	24.3471
1899-12-31 15:27:16	0.2905	0.290139	3.44017	6.35655	15.7012	15.7293	21.0012	25.967	38.981	44.5807	51.5269	49.4428	49.5226	49.6813	46.0981	31.8193	10.9506	24.3552
1899-12-31 15:27:17	0.289982	0.290803	3.44238	6.3607	15.711	15.7391	21.0171	25.9903	39.018	44.6284	51.5798	49.4962	49.5768	49.7326	46.1403	31.8376	10.9558	24.3661
1899-12-31 15:27:18	0.290863	0.291055	3.44379	6.36253	15.7161	15.7447	21.0253	25.9991	39.0311	44.6439	51.6002	49.5146	49.598	49.7532	46.155	31.8443	10.9597	24.3709
1899-12-31 15:27:19	0.290744	0.290427	3.44451	6.36434	15.7188	15.7483	21.0285	26.0048	39.0384	44.6552	51.6167	49.5239	49.6111	49.7625	46.1668	31.8519	10.9647	24.3776
1899-12-31 15:27:20	0.290635	0.289779	3.44569	6.36485	15.7203	15.749	21.0272	26.0007	39.0334	44.6414	51.6058	49.517	49.5977	49.7505	46.1577	31.8462	10.9639	24.3735
1899-12-31 15:27:21	0.291013	0.290992	3.44624	6.36627	15.7206	15.7491	21.0279	26.0008	39.0303	44.6415	51.6009	49.5113	49.595	49.7508	46.1584	31.8516	10.9667	24.3784
1899-12-31 15:27:22	0.291315	0.291426	3.44748	6.36791	15.7228	15.7516	21.0282	26.0008	39.0326	44.6418	51.5998	49.5113	49.5989	49.7538	46.1655	31.8606	10.9714	24.388
1899-12-31 15:27:23	0.291491	0.290683	3.44815	6.36926	15.725	15.7547	21.0301	26.0022	39.0321	44.642	51.6003	49.5173	49.6022	49.7561	46.1708	31.8676	10.9748	24.3934
1899-12-31 15:27:24	0.291244	0.291092	3.44928	6.37042	15.7279	15.7578	21.0338	26.0074	39.0398	44.6546	51.6173	49.5294	49.6202	49.7703	46.1896	31.8834	10.9804	24.4058
1899-12-31 15:27:25	0.291583	0.290898	3.45029	6.37232	15.7318	15.7604	21.0377	26.0119	39.0435	44.6555	51.621	49.5327	49.6205	49.7718	46.1901	31.8828	10.9799	24.4049
1899-12-31 15:27:26	0.291978	0.291833	3.45154	6.37397	15.7348	15.7638	21.0401	26.0147	39.0443	44.6594	51.6196	49.532	49.615	49.7692	46.1805	31.8725	10.9768	24.3967
1899-12-31 15:27:27	0.292122	0.291832	3.45272	6.37664	15.7399	15.7685	21.046	26.0233	39.057	44.6689	51.6375	49.5477	49.6353	49.7828	46.1931	31.8785	10.9786	24.4
1899-12-31 15:27:28	0.292078	0.292925	3.45405	6.37894	15.7461	15.7746	21.0557	26.0356	39.0778	44.688	51.6604	49.5682	49.6573	49.8052	46.2075	31.8834	10.9812	24.4028
1899-12-31 15:27:29	0.292348	0.291247	3.45579	6.38181	15.7521	15.7806	21.0655	26.0474	39.0944	44.7066	51.6841	49.5962	49.6776	49.8265	46.2236	31.8892	10.9821	24.4052
1899-12-31 15:27:30	0.292662	0.292321	3.4572	6.38455	15.7578	15.7864	21.0741	26.0578	39.1086	44.7169	51.705	49.6114	49.6932	49.8405	46.2308	31.8874	10.9825	24.4021
1899-12-31 15:27:31	0.292771	0.293001	3.4586	6.38703	15.7646	15.7928	21.084	26.0732	39.1349	44.7458	51.7415	49.6479	49.7261	49.8815	46.2657	31.9078	10.9905	24.4161
1899-12-31 15:27:32	0.292709	0.292076	3.45989	6.38895	15.7702	15.7995	21.0951	26.086	39.155	44.7696	51.7757	49.6839	49.7658	49.9187	46.3078	31.9349	11.0012	24.4392
1899-12-31 15:27:33	0.293405	0.292927	3.46147	6.39118	15.7742	15.8042	21.1	26.0928	39.1637	44.7752	51.7988	49.7007	49.7812	49.9357	46.3267	31.9483	11.007	24.4487
1899-12-31 15:27:34	0.293336	0.293281	3.46255	6.39276	15.778	15.8079	21.1051	26.1	39.1745	44.7884	51.8115	49.7144	49.7954	49.9462	46.3413	31.9598	11.0108	24.4552
1899-12-31 15:27:35	0.293138	0.293101	3.4636	6.39433	15.7806	15.8096	21.1085	26.1016	39.1735	44.79	51.8126	49.7157	49.797	49.9493	46.3419	31.961	11.0132	24.4576
1899-12-31 15:27:36	0.293195	0.292981	3.4642	6.39616	15.7826	15.812	21.1081	26.1017	39.175	44.7915	51.809	49.71	49.793	49.9461	46.3374	31.9578	11.0128	24.4555
1899-12-31 15:27:37	0.293838	0.293671	3.46574	6.39747	15.7848	15.8138	21.1091	26.1024	39.177	44.7838	51.8059	49.7026	49.784	49.9347	46.3263	31.9489	11.0113	24.4499
1899-12-31 15:27:38	0.293557	0.29251	3.46634	6.39909	15.7872	15.8169	21.1103	26.1058	39.1773	44.7927	51.8022	49.7007	49.7807	49.9337	46.321	31.9439	11.009	24.4462
1899-12-31 15:27:39	0.293906	0.294372	3.46777	6.40121	15.792	15.8215	21.1167	26.1135	39.1919	44.8	51.8166	49.716	49.7963	49.9472	46.3361	31.9539	11.0133	24.4522
1899-12-31 15:27:40	0.293841	0.293911	3.46852	6.40245	15.7934	15.8222	21.116	26.1102	39.1848	44.7931	51.7971	49.6961	49.774	49.921	46.3086	31.9324	11.0057	24.4354
1899-12-31 15:27:41	0.29406	0.29468	3.46993	6.40464	15.7975	15.8259	21.1215	26.1178	39.1959	44.8098	51.8141	49.7125	49.791	49.9445	46.3277	31.9504	11.0131	24.4494
1899-12-31 15:27:42	0.294281	0.29493	3.47096	6.40602	15.8012	15.8293	21.125	26.1213	39.2035	44.8132	51.8183	49.719	49.7983	49.9503	46.3387	31.9599	11.018	24.4577
1899-12-31 15:27:43	0.294421	0.293993	3.47178	6.40759	15.8028	15.8322	21.1252	26.1213	39.2005	44.8056	51.8135	49.7096	49.7912	49.9391	46.329	31.9536	11.0178	24.4547
1899-12-31 15:27:44	0.294867	0.294252	3.47312	6.40873	15.8051	15.8323	21.1254	26.1215	39.2009	44.8053	51.8083	49.7092	49.7864	49.9404	46.3293	31.9604	11.0196	24.4591
1899-12-31 15:27:45	0.294641	0.294318	3.47392	6.41043	15.807	15.8353	21.1273	26.1221	39.1992	44.8071	51.8073	49.7057	49.7865	49.9378	46.3332	31.9674	11.0239	24.466
1899-12-31 15:27:46	0.294913	0.294782	3.47442	6.41132	15.8074	15.8355	21.1243	26.1166	39.1893	44.7916	51.7869	49.6856	49.7618	49.9095	46.3093	31.951	11.019	24.4548
1899-12-31 15:27:47	0.295345	0.295437	3.47547	6.41282	15.8093	15.8387	21.1238	26.1155	39.189	44.7846	51.779	49.6783	49.7573	49.9074	46.3059	31.9517	11.0202	24.457
1899-12-31 15:27:48	0.294799	0.294925	3.4765	6.41375	15.8101	15.84	21.1249	26.1156	39.1858	44.7822	51.7797	49.6803	49.7566	49.9115	46.3111	31.9611	11.0246	24.465
1899-12-31 15:27:49	0.295232	0.294372	3.47705	6.41494	15.8107	15.8406	21.1217	26.1114	39.1778	44.7719	51.7556	49.6561	49.7309	49.8895	46.2864	31.9438	11.0203	24.454
1899-12-31 15:27:50	0.295794	0.294719	3.47841	6.41642	15.8133	15.8425	21.1234	26.1121	39.1783	44.7677	51.7517	49.6542	49.7315	49.888	46.288	31.9497	11.0234	24.4591
1899-12-31 15:27:51	0.295297	0.295016	3.47901	6.4178	15.8149	15.8439	21.1219	26.11	39.1751	44.7635	51.7376	49.6429	49.7169	49.8747	46.2737	31.9422	11.0229	24.4547
1899-12-31 15:27:52	0.295741	0.29557	3.47973	6.41931	15.816	15.8454	21.1218	26.1086	39.1717	44.7567	51.7259	49.6279	49.7058	49.861	46.26	31.9364	11.021	24.4515
1899-12-31 15:27:53	0.295946	0.294965	3.48089	6.4206	15.8178	15.8468	21.1213	26.1053	39.1654	44.754	51.7131	49.6186	49.6939	49.8456	46.2466	31.932	11.0214	24.4498
1899-12-31 15:27:54	0.296362	0.296484	3.48169	6.42174	15.8197	15.8487	21.1213	26.1064	39.167	44.7465	51.7101	49.6118	49.6903	49.8437	46.2474	31.9389	11.0247	24.4564
1899-12-31 15:27:55	0.29624	0.29703	3.48264	6.42264	15.8202	15.8489	21.1184	26.1001	39.1511	44.7341	51.6836	49.589	49.6657	49.8173	46.2245	31.926	11.0219	24.4494
1899-12-31 15:27:56	0.296343	0.296391	3.48307	6.42376	15.8207	15.8506	21.1167	26.0967	39.149	44.7255	51.6712	49.5736	49.6548	49.8045	46.2182	31.9295	11.0247	24.4554
1899-12-31 15:27:57	0.296528	0.295711	3.48422	6.42431	15.8195	15.8501	21.1107	26.0886	39.1308	44.7051	51.6397	49.5412	49.6252	49.7731	46.1969	31.9249	11.0253	24.4551
1899-12-31 15:27:57	0.296813	0.296285	3.48371	6.42479	15.8179	15.8471	21.1016	26.074	39.105	44.6808	51.5955	49.4994	49.5786	49.7327	46.1653	31.9146	11.0236	24.4509
1899-12-31 15:27:58	0.296575	0.295381	3.48452	6.42481	15.815	15.8425	21.0911	26.0571	39.0808	44.6511	51.541	49.4482	49.5207	49.6844	46.1177	31.8891	11.0163	24.4362
1899-12-31 15:27:59	0.297157	0.295479	3.48451	6.42503	15.8127	15.8412	21.0837	26.0447	39.0569	44.6195	51.5047	49.411	49.4857	49.6445	46.0905	31.8794	11.016	24.4323
1899-12-31 15:29:15	0.310002	0.306937	3.58677	6.59305	16.185	16.2097	21.6094	26.7118	40.0817	45.8326	52.9069	50.7477	50.8101	50.9746	47.1751	32.4557	11.2687	24.8158
1899-12-31 15:29:16	0.310038	0.309093	3.58745	6.59437	16.1848	16.2154	21.6176	26.717	40.0831	45.8195	52.9143	50.7459	50.82	50.9722	47.1824	32.4581	11.272	24.8182
1899-12-31 15:29:17	0.310438	0.310014	3.58893	6.59671	16.1878	16.2178	21.6183	26.7179	40.0824	45.8147	52.9032	50.7349	50.8082	50.9555	47.1702	32.4479	11.2698	24.811
1899-12-31 15:29:18	0.310209	0.309484	3.59	6.59827	16.1928	16.2228	21.6227	26.7234	40.0914	45.8239	52.9183	50.7526	50.8279	50.9771	47.1911	32.4687	11.2783	24.8293
1899-12-31 15:29:19	0.310372	0.30905	3.59068	6.5995	16.1929	16.2232	21.6211	26.7199	40.0894	45.8161	52.9039	50.7353	50.8089	50.959	47.177	32.4619	11.2768	24.8243
1899-12-31 15:29:20	0.310512	0.309997	3.59175	6.60067	16.1944	16.2249	21.6195	26.7165	40.0779	45.8069	52.8896	50.7202	50.7969	50.9446	47.168	32.4577	11.2756	24.8234
1899-12-31 15:29:21	0.310853	0.310829	3.59253	6.60173	16.1927	16.224	21.6144	26.7088	40.0647	45.7871	52.8646	50.6946	50.7667	50.9221	47.1419	32.4417	11.2713	24.813
1899-12-31 15:29:22	0.311092	0.310452	3.59292	6.60261	16.1938	16.2236	21.6127	26.7048	40.06	45.7724	52.849	50.6816	50.7517	50.9054	47.1326	32.4402	11.2723	24.8137
1899-12-31 15:29:23	0.310983	0.309679	3.59365	6.60325	16.1938	16.2231	21.6086	26.6985	40.0495	45.7554	52.8287	50.6634	50.73	50.8872	47.1164	32.4337	11.2718	24.8105
1899-12-31 15:29:24	0.311363	0.309905	3.59442	6.60373	16.1939	16.2232	21.6047	26.6933	40.0395	45.736	52.8086	50.6447	50.7131	50.8718	47.1052	32.4333	11.273	24.8126
1899-12-31 15:29:25	0.311532	0.31043	3.59444	6.60438	16.1915	16.2225	21.5974	26.6812	40.0175	45.7115	52.7681	50.6052	50.6764	50.831	47.0648	32.4098	11.2676	24.7963
1899-12-31 15:29:26	0.311346	0.310973	3.59531	6.60543	16.1924	16.2222	21.5951	26.6766	40.0089	45.7004	52.7517	50.5902	50.6644	50.8168	47.0579	32.4137	11.2689	24.8025
1899-12-31 15:29:27	0.311292	0.310825	3.59611	6.60595	16.1924	16.2217	21.5909	26.6709	39.9996	45.6821	52.7275	50.5696	50.6472	50.7938	47.0437	32.4073	11.2672	24.7994
1899-12-31 15:29:28	0.312015	0.310516	3.59649	6.60691	16.1923	16.2217	21.5883	26.6657	39.9888	45.6664	52.7103	50.5513	50.6274	50.7799	47.0314	32.4041	11.2672	24.7993
1899-12-31 15:29:29	0.31204	0.311348	3.59746	6.60812	16.1925	16.2235	21.5874	26.6637	39.9825	45.6616	52.7023	50.5493	50.6258	50.7746	47.0347	32.4127	11.2712	24.8087
1899-12-31 15:29:30	0.311662	0.31124	3.59798	6.60858	16.1927	16.2237	21.5842	26.6591	39.9775	45.647	52.6865	50.5331	50.6018	50.7571	47.0164	32.4037	11.2696	24.8033
1899-12-31 15:29:31	0.311634	0.310818	3.59848	6.60977	16.1954	16.2248	21.5842	26.6591	39.9774	45.652	52.6875	50.534	50.6092	50.7608	47.0268	32.4151	11.2743	24.8123
1899-12-31 15:29:32	0.311709	0.310748	3.59978	6.6114	16.1966	16.2256	21.5852	26.659	39.9743	45.6471	52.6832	50.5308	50.6054	50.7574	47.0271	32.4178	11.2765	24.8158
1899-12-31 15:29:33	0.312126	0.311061	3.6001	6.61202	16.1968	16.2255	21.5834	26.6544	39.9689	45.6374	52.6648	50.5153	50.5871	50.7392	47.0111	32.4084	11.2736	24.8093
1899-12-31 15:29:33	0.312247	0.311865	3.60141	6.61321	16.1967	16.227	21.5803	26.6503	39.9578	45.6215	52.6549	50.4984	50.5739	50.7243	46.9974	32.4003	11.2715	24.8037
1899-12-31 15:29:34	0.312403	0.311653	3.60193	6.61437	16.1981	16.2282	21.5798	26.6495	39.9555	45.6246	52.6477	50.494	50.5679	50.7116	46.9919	32.3963	11.2708	24.8023
1899-12-31 15:29:35	0.312444	0.312069	3.60273	6.61486	16.1985	16.2296	21.5779	26.6455	39.9501	45.6084	52.6337	50.4753	50.5497	50.6945	46.9732	32.386	11.2676	24.7923
1899-12-31 15:29:36	0.312653	0.311737	3.60393	6.61653	16.2012	16.2321	21.58	26.6495	39.9581	45.6177	52.6427	50.4859	50.5594	50.7075	46.9862	32.3969	11.2725	24.8022
1899-12-31 15:29:37	0.312447	0.311389	3.60493	6.61833	16.2044	16.2347	21.5864	26.6556	39.9611	45.6262	52.6534	50.4973	50.573	50.7156	46.9998	32.4069	11.2777	24.8117
1899-12-31 15:29:38	0.313079	0.312702	3.60634	6.62067	16.2091	16.2394	21.591	26.6639	39.9771	45.6406	52.6714	50.5171	50.591	50.7418	47.0179	32.4207	11.2818	24.8213
1899-12-31 15:29:39	0.312968	0.313504	3.60704	6.62164	16.2117	16.2428	21.5939	26.6671	39.9849	45.6447	52.6733	50.5199	50.5939	50.7399	47.0176	32.4161	11.2808	24.8173
1899-12-31 15:29:40	0.313322	0.313315	3.60796	6.62376	16.2158	16.2454	21.6004	26.6752	39.9951	45.6622	52.6899	50.5342	50.6093	50.7585	47.03	32.4222	11.2833	24.8207
1899-12-31 15:29:41	0.313655	0.31311	3.61	6.62635	16.2218	16.2508	21.6076	26.6844	40.008	45.6807	52.7086	50.5558	50.6274	50.7835	47.0444	32.4279	11.2858	24.8241
1899-12-31 15:29:42	0.313533	0.313093	3.6111	6.6283	16.226	16.2562	21.6146	26.6932	40.0229	45.6949	52.732	50.5756	50.6493	50.8012	47.0631	32.4409	11.2908	24.832
1899-12-31 15:29:43	0.313806	0.313726	3.61233	6.6306	16.2314	16.2609	21.6215	26.7039	40.0371	45.7172	52.7579	50.5983	50.6689	50.8201	47.0819	32.4488	11.2943	24.8383
1899-12-31 15:29:44	0.314169	0.313687	3.61378	6.63284	16.2369	16.2662	21.6297	26.7135	40.0525	45.7338	52.78	50.6185	50.686	50.8469	47.0972	32.4582	11.2976	24.8433
1899-12-31 15:29:45	0.314506	0.313606	3.61514	6.63454	16.2417	16.2703	21.6357	26.7223	40.067	45.7516	52.7977	50.6343	50.6982	50.8583	47.1083	32.4621	11.2997	24.8455
1899-12-31 15:29:46	0.314517	0.314686	3.61649	6.63739	16.2461	16.2749	21.6437	26.7308	40.0779	45.7725	52.816	50.6515	50.7158	50.8764	47.1233	32.468	11.3024	24.8501
1899-12-31 15:29:47	0.314502	0.313748	3.61817	6.63986	16.2539	16.2839	21.6553	26.7478	40.1046	45.8039	52.8574	50.6905	50.7606	50.9163	47.1645	32.4957	11.3138	24.8719
1899-12-31 15:29:48	0.31494	0.313648	3.6194	6.6424	16.2576	16.2879	21.6616	26.7567	40.1161	45.8212	52.8763	50.7106	50.7809	50.9335	47.1783	32.5049	11.3173	24.8775
1899-12-31 15:29:49	0.314944	0.315464	3.62055	6.64385	16.2615	16.2904	21.6671	26.7611	40.1227	45.8282	52.8799	50.7075	50.7822	50.9353	47.1711	32.4946	11.3142	24.8684
1899-12-31 15:29:50	0.31499	0.315358	3.62221	6.64603	16.2658	16.2956	21.6718	26.7671	40.1343	45.8384	52.8931	50.7201	50.7903	50.9453	47.1792	32.4974	11.3148	24.8692
1899-12-31 15:29:51	0.315267	0.31475	3.62303	6.64819	16.2704	16.3003	21.6788	26.7765	40.148	45.8603	52.9171	50.7427	50.8148	50.9667	47.1985	32.5096	11.3201	24.878
1899-12-31 15:29:52	0.315538	0.315456	3.62424	6.65012	16.2742	16.3032	21.6834	26.7829	40.1612	45.8676	52.9256	50.7524	50.8211	50.9733	47.2007	32.5054	11.3196	24.8736
1899-12-31 15:29:53	0.315568	0.315695	3.62602	6.6527	16.2811	16.3104	21.6954	26.7985	40.1838	45.8986	52.9682	50.7948	50.8679	51.0237	47.2454	32.5383	11.33	24.8979
1899-12-31 15:29:54	0.315779	0.314836	3.6274	6.65441	16.2851	16.3145	21.7009	26.8064	40.1988	45.9105	52.9828	50.8108	50.883	51.0377	47.2524	32.5392	11.3307	24.8982
1899-12-31 15:29:55	0.316433	0.315183	3.6285	6.65668	16.2886	16.3183	21.7053	26.8116	40.2051	45.9217	52.9902	50.819	50.8875	51.0454	47.2526	32.5361	11.3299	24.8934
1899-12-31 15:29:56	0.316205	0.314959	3.62945	6.65876	16.2952	16.3231	21.7147	26.8226	40.2235	45.9437	53.0143	50.8454	50.9103	51.0647	47.2743	32.5466	11.333	24.9006
1899-12-31 15:29:57	0.316505	0.316957	3.63129	6.66118	16.2999	16.3296	21.7233	26.8338	40.2441	45.9634	53.0353	50.8659	50.9325	51.088	47.2935	32.5528	11.3363	24.9047
1899-12-31 15:29:58	0.316836	0.315424	3.63307	6.66354	16.3064	16.3364	21.7335	26.8475	40.2599	45.9918	53.0644	50.8958	50.9691	51.12	47.3215	32.5676	11.342	24.9153
1899-12-31 15:29:59	0.316925	0.317338	3.63409	6.66617	16.3125	16.3408	21.7429	26.8605	40.2833	46.0105	53.1031	50.9273	51.005	51.1496	47.3488	32.5825	11.3476	24.9261
1899-12-31 15:30:00	0.316733	0.316538	3.63618	6.66879	16.3189	16.351	21.755	26.8746	40.3027	46.0348	53.1342	50.9604	51.0302	51.1856	47.3721	32.5928	11.3522	24.9329
1899-12-31 15:31:16	0.331273	0.330057	3.72677	6.80961	16.5948	16.6282	22.0981	27.2879	40.9017	46.6957	53.8878	51.6646	51.7349	51.9148	47.9654	32.9334	11.5371	25.1803
1899-12-31 15:31:16	0.330073	0.329226	3.72681	6.8124	16.6018	16.6323	22.1078	27.2981	40.9222	46.7255	53.9138	51.6961	51.7682	51.9208	47.9951	32.9581	11.5425	25.1978
1899-12-31 15:31:17	0.330068	0.329454	3.72879	6.81492	16.6085	16.6392	22.1165	27.3079	40.9365	46.7341	53.9332	51.7202	51.7955	51.9445	48.016	32.9753	11.5488	25.2109
1899-12-31 15:31:18	0.330151	0.32897	3.72918	6.81648	16.6082	16.6378	22.1132	27.3009	40.9268	46.7208	53.9015	51.6847	51.7564	51.9079	47.9763	32.9434	11.5374	25.185
1899-12-31 15:31:19	0.330519	0.330408	3.73049	6.81741	16.6095	16.6401	22.1131	27.2991	40.9237	46.7164	53.8947	51.673	51.7431	51.894	47.9643	32.9354	11.5328	25.1777
1899-12-31 15:31:20	0.330392	0.329504	3.73146	6.81932	16.6142	16.6442	22.119	27.3077	40.938	46.7324	53.913	51.6958	51.7667	51.9167	47.9904	32.9564	11.542	25.1958
1899-12-31 15:31:21	0.330425	0.330735	3.73213	6.82042	16.6141	16.6439	22.1146	27.3031	40.9292	46.7159	53.8919	51.6714	51.742	51.8927	47.9646	32.939	11.5365	25.1829
1899-12-31 15:31:22	0.330651	0.329659	3.73323	6.82235	16.6176	16.6476	22.1194	27.306	40.9285	46.721	53.8962	51.6776	51.7476	51.9007	47.9758	32.9488	11.5406	25.191
1899-12-31 15:31:23	0.330993	0.329935	3.73416	6.82402	16.6203	16.6504	22.1216	27.3089	40.9358	46.724	53.9028	51.6825	51.7553	51.9065	47.9848	32.9591	11.5457	25.2013
1899-12-31 15:31:24	0.330939	0.330919	3.73528	6.82477	16.6212	16.6521	22.1194	27.3067	40.9321	46.7148	53.8923	51.6738	51.7429	51.8984	47.9758	32.9547	11.5442	25.1976
1899-12-31 15:31:25	0.331267	0.329884	3.73598	6.82577	16.6224	16.6518	22.1193	27.3045	40.9239	46.704	53.8792	51.6626	51.7333	51.8866	47.9653	32.9507	11.5443	25.1955
1899-12-31 15:31:26	0.331316	0.330793	3.7369	6.82692	16.623	16.6543	22.1193	27.303	40.9217	46.7047	53.8719	51.6541	51.7245	51.8834	47.9613	32.9518	11.5459	25.1981
1899-12-31 15:31:27	0.331576	0.331007	3.73752	6.82851	16.6248	16.6558	22.1195	27.3035	40.9212	46.7029	53.8735	51.6587	51.7294	51.8806	47.9715	32.9655	11.553	25.2118
1899-12-31 15:31:28	0.331556	0.331159	3.73835	6.82928	16.6255	16.6552	22.1161	27.2969	40.9102	46.6867	53.8504	51.6372	51.7088	51.8663	47.9532	32.9554	11.5518	25.2061
1899-12-31 15:31:29	0.33166	0.330667	3.73919	6.83038	16.6255	16.6559	22.114	27.2934	40.9038	46.6776	53.8344	51.6201	51.6933	51.849	47.9406	32.9522	11.55	25.2026
1899-12-31 15:31:30	0.331969	0.330707	3.73974	6.83069	16.6262	16.6551	22.1124	27.2906	40.896	46.6673	53.8226	51.6086	51.6851	51.837	47.9287	32.9468	11.5494	25.1997
1899-12-31 15:31:31	0.332018	0.331506	3.74069	6.83262	16.6283	16.6583	22.1135	27.2925	40.8994	46.673	53.8239	51.6142	51.6866	51.8412	47.9378	32.9545	11.5539	25.2082
1899-12-31 15:31:32	0.332269	0.330471	3.74159	6.83372	16.63	16.6594	22.1133	27.2899	40.8897	46.6648	53.8114	51.5985	51.6777	51.8248	47.9233	32.9462	11.5513	25.2013
1899-12-31 15:31:33	0.332362	0.331382	3.74246	6.83473	16.6308	16.6612	22.112	27.2871	40.8897	46.6621	53.8036	51.5896	51.6657	51.8216	47.9125	32.9406	11.55	25.197
1899-12-31 15:31:34	0.332521	0.332041	3.74346	6.8356	16.6316	16.6621	22.1106	27.2845	40.882	46.6493	53.7848	51.5737	51.6468	51.7989	47.8923	32.9263	11.5463	25.1852
1899-12-31 15:31:35	0.332872	0.33236	3.74443	6.83774	16.6347	16.6654	22.1168	27.2918	40.8936	46.6662	53.8021	51.5935	51.6659	51.8196	47.9168	32.9448	11.555	25.2025
1899-12-31 15:31:36	0.332241	0.332045	3.74531	6.83936	16.6371	16.6684	22.1183	27.2932	40.8959	46.6589	53.7989	51.5871	51.6608	51.8129	47.9092	32.9413	11.5549	25.1989
1899-12-31 15:31:37	0.333197	0.332308	3.74661	6.84148	16.6401	16.6711	22.1226	27.2982	40.9009	46.6617	53.8061	51.5903	51.6662	51.8182	47.912	32.9421	11.556	25.2003
1899-12-31 15:31:38	0.333093	0.332997	3.74804	6.84262	16.6446	16.6738	22.1254	27.3032	40.9109	46.674	53.8184	51.601	51.6769	51.8321	47.9236	32.9508	11.5608	25.2072
1899-12-31 15:31:39	0.333428	0.333169	3.74924	6.84498	16.6475	16.679	22.1296	27.3064	40.9155	46.676	53.8233	51.6074	51.6792	51.834	47.9269	32.9531	11.5634	25.21
1899-12-31 15:31:40	0.333547	0.332805	3.74978	6.84682	16.6502	16.6815	22.1325	27.3098	40.9231	46.6819	53.8273	51.611	51.6846	51.8397	47.9315	32.9564	11.5656	25.2126
1899-12-31 15:31:41	0.333569	0.332713	3.75086	6.84811	16.6524	16.685	22.1341	27.3105	40.9182	46.6828	53.8222	51.6071	51.6812	51.8359	47.9271	32.953	11.5659	25.2093
1899-12-31 15:31:42	0.333558	0.333155	3.75272	6.85066	16.6588	16.6901	22.143	27.3231	40.9414	46.7071	53.858	51.6433	51.7161	51.8698	47.9689	32.9835	11.5784	25.234
1899-12-31 15:31:43	0.334223	0.333646	3.75372	6.85164	16.6619	16.6933	22.1471	27.3279	40.9486	46.7122	53.8679	51.6489	51.7218	51.8746	47.9739	32.9857	11.581	25.2349
1899-12-31 15:31:44	0.334132	0.332988	3.75484	6.85405	16.6659	16.6964	22.1522	27.3337	40.9591	46.7214	53.8786	51.6599	51.7316	51.8875	47.9813	32.9917	11.5835	25.2379
1899-12-31 15:31:45	0.33448	0.33318	3.75619	6.85584	16.6699	16.701	22.1572	27.3397	40.9646	46.7262	53.8874	51.6686	51.7425	51.89	47.9873	32.9932	11.5847	25.2386
1899-12-31 15:31:46	0.334566	0.333486	3.75734	6.85821	16.6742	16.7054	22.1655	27.3497	40.9811	46.7453	53.9121	51.6931	51.771	51.9123	48.009	33.0092	11.5907	25.2497
1899-12-31 15:31:47	0.334448	0.334421	3.75867	6.86077	16.6794	16.7117	22.1727	27.3605	40.9931	46.7645	53.9344	51.7192	51.7962	51.9443	48.0298	33.0201	11.5957	25.2576
1899-12-31 15:31:48	0.334863	0.334574	3.76	6.86286	16.686	16.7165	22.1809	27.3706	41.01	46.7804	53.9552	51.7405	51.8138	51.964	48.0409	33.0241	11.5977	25.2591
1899-12-31 15:31:49	0.335175	0.33497	3.76175	6.86507	16.6917	16.7226	22.1909	27.3832	41.0292	46.8061	53.9822	51.7658	51.8379	51.9889	48.0588	33.0311	11.6005	25.263
1899-12-31 15:31:50	0.33552	0.335221	3.76338	6.86825	16.6993	16.7294	22.2023	27.3974	41.0497	46.833	54.0153	51.7931	51.8721	52.0212	48.0854	33.0433	11.6076	25.2719
1899-12-31 15:31:51	0.335616	0.334386	3.76491	6.87084	16.7048	16.7356	22.2128	27.412	41.0719	46.8656	54.0472	51.8233	51.9009	52.0489	48.1078	33.0545	11.6131	25.2786
1899-12-31 15:31:52	0.335445	0.335682	3.76667	6.87385	16.7116	16.7417	22.2228	27.4238	41.091	46.883	54.0706	51.8412	51.9196	52.0734	48.1196	33.0558	11.6149	25.2765
1899-12-31 15:31:53	0.335837	0.335556	3.76759	6.87588	16.7171	16.7458	22.2315	27.4338	41.1025	46.8993	54.093	51.8606	51.9374	52.088	48.1324	33.0599	11.6152	25.278
1899-12-31 15:31:54	0.336192	0.335922	3.76942	6.87843	16.7235	16.7527	22.2407	27.4475	41.1254	46.9254	54.1186	51.8885	51.9633	52.1194	48.1573	33.0701	11.6202	25.2847
1899-12-31 15:31:55	0.336244	0.335366	3.77057	6.8806	16.7277	16.7575	22.2478	27.4554	41.1364	46.9395	54.1406	51.9078	51.9791	52.1331	48.1693	33.0731	11.6215	25.2851
1899-12-31 15:31:56	0.336116	0.33641	3.7723	6.883	16.7349	16.767	22.2611	27.4727	41.1656	46.9801	54.1813	51.9529	52.027	52.1781	48.2139	33.1026	11.6331	25.3069
1899-12-31 15:31:57	0.337058	0.336074	3.77333	6.8856	16.7398	16.7694	22.2666	27.4813	41.1767	46.9935	54.1976	51.9661	52.0411	52.1908	48.222	33.1052	11.6343	25.3064
1899-12-31 15:31:58	0.335971	0.336365	3.77493	6.88833	16.7456	16.7772	22.2767	27.4948	41.1992	47.0196	54.2319	52.0005	52.0749	52.227	48.2551	33.1266	11.6411	25.3228
1899-12-31 15:31:58	0.336892	0.336055	3.77596	6.89052	16.7516	16.7807	22.2845	27.5034	41.2075	47.0364	54.2505	52.0185	52.0904	52.2433	48.2682	33.1307	11.6428	25.3248
1899-12-31 15:31:59	0.337234	0.33614	3.77784	6.89292	16.7558	16.7874	22.2926	27.5132	41.2251	47.0575	54.2723	52.0375	52.1094	52.265	48.2835	33.1381	11.6456	25.3291
1899-12-31 15:32:00	0.337533	0.336691	3.77962	6.89561	16.7638	16.7944	22.3043	27.5303	41.2502	47.0901	54.312	52.0837	52.15	52.3022	48.321	33.1605	11.6534	25.3461
1899-12-31 15:33:15	0.352689	0.352555	3.89403	7.08607	17.2127	17.2395	23.0031	28.4359	42.6621	48.7644	56.2977	53.9554	54.0039	54.1383	49.7905	33.8614	11.9644	25.7993
1899-12-31 15:33:16	0.352045	0.351882	3.89526	7.08875	17.2176	17.2497	23.0121	28.4456	42.677	48.7847	56.3088	53.9771	54.0222	54.1634	49.806	33.8736	11.9681	25.8008
1899-12-31 15:33:17	0.352604	0.350778	3.89755	7.09213	17.2265	17.2574	23.0249	28.4611	42.6946	48.8147	56.3428	54.0045	54.049	54.1836	49.8246	33.8788	11.9713	25.8029
1899-12-31 15:33:18	0.352627	0.351996	3.89931	7.09523	17.2322	17.2638	23.0356	28.4756	42.7135	48.8406	56.3733	54.0335	54.0816	54.2159	49.8572	33.9001	11.9794	25.8184
1899-12-31 15:33:19	0.352556	0.35211	3.90076	7.09726	17.2358	17.2686	23.0401	28.4808	42.7277	48.8454	56.3829	54.037	54.0816	54.2175	49.8552	33.8952	11.9795	25.8138
1899-12-31 15:33:20	0.352881	0.352298	3.90232	7.09943	17.2424	17.2747	23.0513	28.4955	42.7411	48.8736	56.4143	54.0763	54.1219	54.268	49.8948	33.9268	11.992	25.8363
1899-12-31 15:33:21	0.35334	0.352209	3.90362	7.10191	17.2473	17.2797	23.0563	28.5024	42.7546	48.8937	56.4343	54.0892	54.1368	54.2834	49.9065	33.9345	11.9956	25.842
1899-12-31 15:33:22	0.353492	0.352921	3.90457	7.10431	17.2507	17.2841	23.0638	28.5095	42.768	48.9054	56.4455	54.1056	54.1522	54.301	49.9226	33.9461	12.0011	25.8501
1899-12-31 15:33:23	0.353332	0.35241	3.90597	7.10534	17.2531	17.2869	23.0635	28.5099	42.7661	48.9044	56.44	54.0962	54.1399	54.2907	49.9095	33.9359	11.9978	25.8402
1899-12-31 15:33:24	0.353747	0.353538	3.9069	7.10745	17.2579	17.2897	23.0681	28.517	42.775	48.9161	56.456	54.1165	54.1591	54.3085	49.9274	33.9471	12.003	25.8517
1899-12-31 15:33:25	0.353866	0.353793	3.90843	7.10963	17.2619	17.294	23.0741	28.523	42.785	48.9253	56.4691	54.1284	54.1726	54.3272	49.9376	33.9529	12.0055	25.8555
1899-12-31 15:33:26	0.354049	0.353541	3.90986	7.11164	17.2659	17.2981	23.0796	28.5311	42.7945	48.9402	56.4814	54.1416	54.1848	54.3333	49.9466	33.9565	12.0085	25.8578
1899-12-31 15:33:27	0.354184	0.353145	3.91104	7.11382	17.2703	17.3025	23.0855	28.538	42.8071	48.9449	56.4972	54.1523	54.1957	54.3436	49.9556	33.9608	12.0114	25.8614
1899-12-31 15:33:28	0.35448	0.354747	3.91209	7.11539	17.2749	17.3077	23.0911	28.5468	42.8185	48.9627	56.515	54.1716	54.2118	54.3638	49.9706	33.97	12.016	25.8686
1899-12-31 15:33:29	0.354569	0.352679	3.91344	7.11785	17.2789	17.3107	23.0965	28.5527	42.8296	48.9709	56.5212	54.1761	54.215	54.3664	49.9702	33.9653	12.0162	25.8642
1899-12-31 15:33:30	0.354468	0.353547	3.9151	7.12039	17.2851	17.3179	23.1089	28.5677	42.8539	48.9983	56.557	54.2047	54.2491	54.3938	49.9978	33.984	12.0254	25.8784
1899-12-31 15:33:31	0.355037	0.354764	3.91665	7.12281	17.2913	17.3234	23.1157	28.5771	42.8683	49.0194	56.5765	54.223	54.273	54.4159	50.0167	33.9958	12.0296	25.887
1899-12-31 15:33:32	0.355382	0.353851	3.91796	7.12532	17.2966	17.3289	23.1239	28.5877	42.8828	49.033	56.6009	54.2432	54.2939	54.4306	50.0334	34.0052	12.0338	25.8936
1899-12-31 15:33:33	0.355225	0.355005	3.91901	7.12779	17.3017	17.3336	23.132	28.5972	42.8972	49.0625	56.6188	54.265	54.3135	54.4509	50.0503	34.014	12.0383	25.8994
1899-12-31 15:33:34	0.355734	0.354742	3.92084	7.13024	17.3073	17.3375	23.1391	28.608	42.9134	49.0783	56.6407	54.2931	54.3395	54.4769	50.0771	34.0333	12.047	25.9148
1899-12-31 15:33:35	0.35532	0.354708	3.92209	7.13174	17.3089	17.3416	23.1394	28.6062	42.9109	49.07	56.6297	54.2773	54.3234	54.459	50.0557	34.0154	12.0417	25.8995
1899-12-31 15:33:36	0.355889	0.355181	3.92312	7.13316	17.3122	17.345	23.143	28.6102	42.9163	49.0804	56.6368	54.2829	54.3297	54.4656	50.0661	34.0236	12.0453	25.9069
1899-12-31 15:33:37	0.356201	0.354806	3.92321	7.1334	17.3115	17.3437	23.139	28.6032	42.9031	49.0585	56.6127	54.2546	54.299	54.4418	50.0344	34.0028	12.0385	25.8918
1899-12-31 15:33:38	0.356197	0.355004	3.92441	7.13517	17.3146	17.3455	23.1417	28.6076	42.9093	49.0647	56.6225	54.2681	54.3125	54.4491	50.0506	34.017	12.0438	25.904
1899-12-31 15:33:39	0.356569	0.355241	3.92524	7.13577	17.314	17.3457	23.1373	28.6005	42.8979	49.0445	56.5988	54.2378	54.2844	54.4256	50.0222	33.9991	12.0373	25.8908
1899-12-31 15:33:40	0.356651	0.356305	3.92594	7.13747	17.3163	17.348	23.1386	28.6022	42.8994	49.0431	56.5997	54.2401	54.2905	54.4316	50.0312	34.0114	12.0432	25.9012
1899-12-31 15:33:41	0.356641	0.356022	3.92704	7.13896	17.319	17.3517	23.1419	28.6057	42.9038	49.0584	56.6139	54.2566	54.3081	54.4465	50.0547	34.0341	12.0546	25.9208
1899-12-31 15:33:42	0.356956	0.356064	3.92771	7.13901	17.3182	17.3508	23.1374	28.5973	42.8894	49.033	56.5841	54.2265	54.2747	54.4209	50.0268	34.0176	12.0503	25.9093
1899-12-31 15:33:43	0.356619	0.355416	3.92836	7.14045	17.3182	17.3511	23.1349	28.5949	42.887	49.025	56.5723	54.2183	54.2664	54.4103	50.0214	34.0182	12.0501	25.9104
1899-12-31 15:33:44	0.357311	0.356195	3.92934	7.14129	17.32	17.3514	23.1346	28.5937	42.8808	49.0169	56.5701	54.2176	54.2631	54.4082	50.0228	34.0228	12.0509	25.9158
1899-12-31 15:33:45	0.35754	0.356615	3.93006	7.14313	17.3212	17.3532	23.1342	28.5922	42.8817	49.0194	56.5641	54.2135	54.2613	54.4033	50.0245	34.0277	12.0549	25.9212
1899-12-31 15:33:46	0.357449	0.35615	3.93116	7.14359	17.3215	17.3533	23.1318	28.5877	42.8763	49.0043	56.5482	54.1973	54.2432	54.3906	50.0103	34.0226	12.0539	25.9168
1899-12-31 15:33:47	0.357448	0.356174	3.93133	7.14424	17.3204	17.3526	23.1273	28.5815	42.8615	48.9883	56.5238	54.1741	54.2142	54.369	49.9854	34.0038	12.0478	25.9046
1899-12-31 15:33:48	0.35764	0.356852	3.93185	7.14524	17.3201	17.3533	23.1242	28.5776	42.8538	48.9735	56.5091	54.1608	54.2013	54.3504	49.9715	33.9956	12.0459	25.8992
1899-12-31 15:33:49	0.357813	0.357439	3.93305	7.14685	17.3228	17.3552	23.1264	28.5797	42.8585	48.9831	56.5136	54.1673	54.2084	54.3569	49.9818	34.0068	12.0505	25.9081
1899-12-31 15:33:50	0.357429	0.356671	3.93365	7.14807	17.3249	17.3569	23.127	28.5787	42.8564	48.9799	56.5077	54.1624	54.2004	54.3524	49.9787	34.0051	12.0516	25.9079
1899-12-31 15:33:50	0.357964	0.357222	3.93453	7.14893	17.3263	17.3574	23.1249	28.5756	42.8517	48.9685	56.4931	54.1498	54.1869	54.34	49.9642	33.9963	12.0493	25.9012
1899-12-31 15:33:51	0.358267	0.357997	3.93558	7.15055	17.3279	17.3597	23.1286	28.5793	42.8557	48.9707	56.5013	54.157	54.198	54.3477	49.9734	34.0058	12.054	25.9094
1899-12-31 15:33:52	0.358635	0.357134	3.93648	7.1521	17.3294	17.3613	23.1285	28.5788	42.8545	48.9726	56.4933	54.1491	54.1884	54.341	49.965	33.9989	12.0522	25.9054
1899-12-31 15:33:53	0.358288	0.357424	3.93755	7.15228	17.3301	17.3621	23.1267	28.5765	42.849	48.9568	56.4796	54.1351	54.1761	54.327	49.9547	33.9932	12.05	25.9009
1899-12-31 15:33:54	0.35868	0.358721	3.93815	7.15381	17.3323	17.3645	23.1274	28.5757	42.8465	48.9562	56.4797	54.1326	54.1723	54.3191	49.9534	33.9945	12.0503	25.903
1899-12-31 15:33:55	0.35866	0.357801	3.93933	7.15541	17.3349	17.3662	23.1287	28.5772	42.8468	48.9577	56.4777	54.1367	54.1755	54.3187	49.9562	33.9999	12.0534	25.9074
1899-12-31 15:33:56	0.358809	0.358196	3.94023	7.15677	17.3359	17.3684	23.1309	28.5782	42.8482	48.9626	56.4794	54.1341	54.1774	54.3281	49.962	34.0058	12.0575	25.9133
1899-12-31 15:33:57	0.359111	0.358065	3.94105	7.15815	17.338	17.3692	23.1314	28.5792	42.8506	48.9592	56.4773	54.1371	54.1788	54.3252	49.9658	34.0125	12.0606	25.9188
1899-12-31 15:33:58	0.35947	0.358587	3.94173	7.15959	17.3396	17.3704	23.1308	28.5776	42.8483	48.9544	56.4712	54.1313	54.1725	54.3234	49.9639	34.0148	12.0618	25.9208
1899-12-31 15:33:59	0.358986	0.358756	3.94222	7.15958	17.3384	17.3707	23.1256	28.5703	42.8314	48.9406	56.4438	54.1026	54.1453	54.2954	49.9366	33.9946	12.0566	25.9065
1899-12-31 15:35:15	0.373955	0.37652	4.03557	7.30646	17.6253	17.6553	23.48	28.992	43.4528	49.6264	57.1852	54.8041	54.8389	54.9999	50.5198	34.3508	12.2603	26.1648
1899-12-31 15:35:16	0.37328	0.371971	4.03703	7.30746	17.6277	17.6607	23.4839	29.0001	43.4662	49.6204	57.2049	54.82	54.8571	55.0033	50.5349	34.3615	12.2632	26.1783
1899-12-31 15:35:17	0.373467	0.372368	4.03864	7.31021	17.6342	17.6673	23.4923	29.0096	43.4798	49.6373	57.2216	54.8361	54.8759	55.0226	50.5526	34.3753	12.2694	26.1888
1899-12-31 15:35:18	0.373564	0.373151	4.03944	7.31179	17.6346	17.6679	23.4909	29.0079	43.4771	49.6301	57.2109	54.8233	54.8632	55.0106	50.5382	34.3644	12.2659	26.1811
1899-12-31 15:35:19	0.374067	0.372425	4.04105	7.31364	17.6398	17.6732	23.4992	29.0162	43.4892	49.6515	57.2314	54.845	54.8887	55.033	50.5653	34.3845	12.2741	26.1965
1899-12-31 15:35:20	0.373938	0.373409	4.04249	7.31542	17.6442	17.6764	23.5043	29.0242	43.5012	49.6613	57.2465	54.8635	54.9043	55.0485	50.5826	34.397	12.2788	26.2059
1899-12-31 15:35:21	0.373949	0.373688	4.04319	7.31698	17.6463	17.6786	23.5063	29.0255	43.5012	49.6673	57.2456	54.8615	54.9009	55.047	50.5803	34.3937	12.2786	26.2044
1899-12-31 15:35:22	0.374418	0.373171	4.04427	7.3191	17.6498	17.6812	23.5096	29.0301	43.5052	49.6734	57.2533	54.8711	54.9085	55.0543	50.5869	34.3981	12.2802	26.2073
1899-12-31 15:35:23	0.374485	0.373178	4.0453	7.3207	17.6531	17.686	23.5138	29.0347	43.5146	49.6775	57.2617	54.8808	54.9153	55.0552	50.591	34.401	12.281	26.2094
1899-12-31 15:35:24	0.374776	0.374315	4.04668	7.32249	17.6574	17.69	23.5193	29.043	43.5245	49.7031	57.2812	54.8935	54.9388	55.077	50.6095	34.4129	12.2861	26.2196
1899-12-31 15:35:25	0.374746	0.373524	4.04799	7.32473	17.6617	17.6939	23.5262	29.0479	43.5373	49.7078	57.2941	54.9064	54.9517	55.0865	50.6206	34.4215	12.2894	26.2259
1899-12-31 15:35:26	0.375066	0.374183	4.04824	7.32561	17.662	17.6947	23.5244	29.0467	43.5319	49.6991	57.2803	54.8932	54.9358	55.0697	50.6032	34.4057	12.2832	26.2126
1899-12-31 15:35:27	0.37537	0.374077	4.05003	7.32732	17.6659	17.6992	23.5284	29.0516	43.537	49.7095	57.2888	54.9013	54.9423	55.0826	50.6079	34.4081	12.2825	26.2139
1899-12-31 15:35:28	0.375493	0.373858	4.05106	7.32929	17.6689	17.7016	23.533	29.0569	43.5464	49.7138	57.2919	54.906	54.945	55.0826	50.6064	34.4038	12.2821	26.2098
1899-12-31 15:35:29	0.375557	0.374422	4.05247	7.33132	17.673	17.7054	23.5372	29.062	43.5518	49.7221	57.3056	54.9184	54.9597	55.0938	50.6168	34.4102	12.2851	26.2142
1899-12-31 15:35:30	0.375528	0.374805	4.0537	7.33369	17.6784	17.711	23.5468	29.0747	43.5737	49.7458	57.3338	54.9459	54.9893	55.1178	50.6416	34.427	12.2899	26.2275
1899-12-31 15:35:31	0.376001	0.375359	4.05518	7.33589	17.6838	17.7172	23.5558	29.0849	43.5894	49.7675	57.3618	54.9774	55.0157	55.1485	50.6649	34.4438	12.2965	26.2396
1899-12-31 15:35:32	0.376105	0.374685	4.05656	7.33794	17.6883	17.7224	23.5616	29.0931	43.6027	49.7801	57.3797	54.9921	55.0309	55.1665	50.6799	34.4501	12.3015	26.2451
1899-12-31 15:35:33	0.376515	0.374959	4.058	7.34015	17.693	17.7274	23.5692	29.102	43.6172	49.7921	57.3959	55.0086	55.0444	55.1829	50.6928	34.4577	12.3052	26.2487
1899-12-31 15:35:34	0.376399	0.375709	4.05913	7.34199	17.6978	17.7309	23.575	29.1091	43.6249	49.7996	57.4065	55.0139	55.0517	55.1921	50.6923	34.4528	12.3042	26.2435
1899-12-31 15:35:35	0.376732	0.376942	4.06003	7.34451	17.7009	17.7344	23.5815	29.1159	43.6364	49.8161	57.4172	55.0229	55.0612	55.2085	50.7002	34.4549	12.3065	26.2443
1899-12-31 15:35:36	0.377022	0.375859	4.0619	7.34714	17.7089	17.7405	23.5925	29.1297	43.6582	49.8428	57.4465	55.0548	55.0973	55.2453	50.7374	34.4789	12.3172	26.2641
1899-12-31 15:35:37	0.376939	0.376437	4.06341	7.34929	17.713	17.7457	23.5975	29.1376	43.6662	49.8572	57.4603	55.069	55.1104	55.2595	50.7481	34.4859	12.3204	26.2691
1899-12-31 15:35:38	0.377483	0.376697	4.06504	7.35156	17.7189	17.7521	23.6084	29.1508	43.688	49.8881	57.4983	55.103	55.1451	55.2937	50.7844	34.5112	12.33	26.2889
1899-12-31 15:35:39	0.377736	0.376541	4.06607	7.35353	17.7213	17.755	23.6082	29.1508	43.6869	49.8813	57.4896	55.0903	55.1346	55.2856	50.7676	34.4954	12.3232	26.2758
1899-12-31 15:35:40	0.37793	0.376654	4.06708	7.35555	17.7244	17.758	23.6124	29.1552	43.6925	49.8874	57.4951	55.0947	55.1386	55.2838	50.7681	34.4942	12.3239	26.2747
1899-12-31 15:35:41	0.37775	0.377093	4.06798	7.35695	17.7271	17.7605	23.6148	29.1577	43.6961	49.8914	57.4967	55.0952	55.136	55.2887	50.7656	34.4931	12.3228	26.2736
1899-12-31 15:35:42	0.378304	0.376775	4.06949	7.3588	17.73	17.7646	23.6202	29.1642	43.7041	49.9013	57.5089	55.1072	55.1515	55.3001	50.7804	34.5019	12.3288	26.2819
1899-12-31 15:35:43	0.378111	0.377023	4.07065	7.36013	17.7331	17.7662	23.6227	29.1673	43.7108	49.9074	57.5166	55.1132	55.1529	55.3025	50.7838	34.5042	12.332	26.2829
1899-12-31 15:35:44	0.378175	0.377278	4.07175	7.36203	17.7375	17.7714	23.6286	29.1737	43.7188	49.9124	57.5291	55.1309	55.1671	55.3161	50.8012	34.5179	12.3361	26.2931
1899-12-31 15:35:45	0.378095	0.377462	4.07286	7.36336	17.7387	17.773	23.6288	29.1728	43.7145	49.9142	57.5221	55.1174	55.1625	55.3043	50.7905	34.5097	12.3341	26.2874
1899-12-31 15:35:46	0.378625	0.377686	4.07351	7.36516	17.7418	17.7758	23.6327	29.1762	43.718	49.9175	57.5255	55.1243	55.1655	55.3126	50.7935	34.5131	12.3335	26.2896
1899-12-31 15:35:46	0.378722	0.377884	4.07452	7.36732	17.7453	17.7793	23.637	29.1818	43.728	49.9286	57.5413	55.1404	55.1795	55.3246	50.8105	34.5241	12.3371	26.2995
1899-12-31 15:35:47	0.379046	0.377092	4.0757	7.36873	17.7486	17.7834	23.6403	29.1844	43.7317	49.9323	57.5431	55.1388	55.1791	55.3234	50.8086	34.5238	12.3351	26.2977
1899-12-31 15:35:48	0.379492	0.378711	4.07706	7.3702	17.7508	17.785	23.6414	29.1868	43.7334	49.9319	57.5404	55.1384	55.1806	55.3223	50.8049	34.5189	12.3331	26.2948
1899-12-31 15:35:49	0.379706	0.377772	4.07791	7.37201	17.7535	17.7875	23.6445	29.1902	43.7386	49.9344	57.5435	55.1388	55.1789	55.3247	50.8051	34.5166	12.3322	26.2937
1899-12-31 15:35:50	0.379726	0.377486	4.07909	7.37357	17.7568	17.7904	23.6478	29.1941	43.7435	49.9425	57.5485	55.1473	55.1895	55.3321	50.8121	34.5237	12.3344	26.2981
1899-12-31 15:35:51	0.379514	0.379987	4.08015	7.37542	17.7603	17.7948	23.6534	29.2017	43.7557	49.9543	57.5688	55.1678	55.2104	55.3521	50.8316	34.5382	12.3401	26.3097
1899-12-31 15:35:52	0.380004	0.378852	4.08095	7.37701	17.7627	17.7938	23.6513	29.1994	43.7488	49.9484	57.5521	55.1495	55.1927	55.3333	50.8145	34.5248	12.3354	26.2998
1899-12-31 15:35:53	0.380068	0.37982	4.08173	7.37793	17.763	17.796	23.6523	29.1972	43.7463	49.9408	57.5417	55.1372	55.1758	55.3237	50.7992	34.5133	12.333	26.2909
1899-12-31 15:35:54	0.380128	0.379353	4.08288	7.37919	17.7657	17.7991	23.6551	29.2005	43.7513	49.9444	57.5497	55.1464	55.1878	55.3305	50.8118	34.5247	12.3379	26.3015
1899-12-31 15:35:55	0.380378	0.379379	4.08412	7.38067	17.7687	17.8023	23.658	29.2047	43.7563	49.9502	57.5577	55.1564	55.201	55.3433	50.8246	34.5382	12.3424	26.3122
1899-12-31 15:35:56	0.380675	0.380499	4.08449	7.38157	17.7681	17.8017	23.6553	29.1986	43.7456	49.9376	57.5373	55.133	55.1755	55.3224	50.8022	34.5209	12.3386	26.3
1899-12-31 15:35:57	0.380186	0.380131	4.08562	7.383	17.7708	17.8038	23.6572	29.2026	43.7511	49.9441	57.5467	55.1484	55.1871	55.3313	50.8188	34.5383	12.3455	26.3139
1899-12-31 15:35:58	0.380936	0.379966	4.0864	7.38342	17.7708	17.8046	23.6546	29.1965	43.7439	49.9285	57.5283	55.1262	55.1686	55.314	50.8047	34.5305	12.3438	26.3089
1899-12-31 15:35:59	0.3808	0.380453	4.08693	7.38477	17.7712	17.8045	23.6541	29.1962	43.7413	49.9282	57.5265	55.1274	55.1696	55.3182	50.8104	34.5403	12.3491	26.3183
1899-12-31 15:37:15	0.392501	0.389855	4.16313	7.49592	17.9458	17.98	23.8028	29.3344	43.9091	50.0459	57.6011	55.1946	55.2548	55.4043	50.9049	34.6749	12.4539	26.4468
1899-12-31 15:37:16	0.394054	0.392969	4.16478	7.49887	17.9552	17.9885	23.8104	29.3465	43.9287	50.066	57.6278	55.228	55.2797	55.4217	50.9291	34.6869	12.4633	26.4579
1899-12-31 15:37:17	0.394056	0.393358	4.16703	7.50199	17.9629	17.996	23.8222	29.3613	43.9485	50.0958	57.6638	55.2551	55.3098	55.458	50.957	34.7047	12.4704	26.4702
1899-12-31 15:37:18	0.39464	0.394186	4.1685	7.50474	17.9693	18.0026	23.8318	29.3738	43.9711	50.1113	57.6951	55.2869	55.3425	55.4869	50.9859	34.7229	12.4788	26.4842
1899-12-31 15:37:19	0.394372	0.393277	4.17045	7.50787	17.9766	18.0095	23.8424	29.3894	43.9988	50.1467	57.7355	55.3265	55.3815	55.5236	51.0223	34.7458	12.4878	26.5008
1899-12-31 15:37:20	0.394617	0.394195	4.17182	7.51059	17.9827	18.0174	23.8536	29.402	44.0163	50.165	57.7622	55.3558	55.4058	55.5501	51.0455	34.7591	12.494	26.5097
1899-12-31 15:37:20	0.395285	0.393949	4.17298	7.51287	17.9877	18.0197	23.8585	29.4104	44.0281	50.1748	57.774	55.3637	55.4173	55.5598	51.0468	34.7552	12.4925	26.5047
1899-12-31 15:37:21	0.395103	0.393571	4.17443	7.51459	17.99	18.024	23.8627	29.4145	44.0309	50.1813	57.7788	55.3653	55.413	55.5565	51.0372	34.7414	12.4888	26.4933
1899-12-31 15:37:22	0.395112	0.393966	4.17625	7.51788	17.9993	18.0346	23.8781	29.4344	44.0627	50.22	57.8232	55.4154	55.4661	55.6072	51.082	34.7718	12.5003	26.5135
1899-12-31 15:37:23	0.395623	0.394809	4.17772	7.52041	18.0067	18.0389	23.8885	29.4479	44.0855	50.2472	57.8486	55.4442	55.495	55.6415	51.104	34.783	12.5063	26.521
1899-12-31 15:37:24	0.395672	0.395145	4.17947	7.52291	18.0118	18.0449	23.8974	29.4595	44.0972	50.2658	57.8676	55.4599	55.5114	55.6564	51.1138	34.7841	12.5059	26.5202
1899-12-31 15:37:25	0.396179	0.394607	4.18086	7.52531	18.0163	18.0495	23.9048	29.4671	44.1171	50.2813	57.8849	55.4706	55.523	55.6723	51.1172	34.7787	12.5041	26.5142
1899-12-31 15:37:26	0.396001	0.394538	4.18286	7.52903	18.0255	18.0591	23.9206	29.4889	44.1541	50.324	57.9406	55.5188	55.5726	55.7194	51.1658	34.8079	12.5148	26.5364
1899-12-31 15:37:27	0.396509	0.395245	4.18443	7.53181	18.0329	18.0656	23.9314	29.5032	44.1749	50.3516	57.9717	55.5509	55.6011	55.751	51.1901	34.8208	12.5203	26.5452
1899-12-31 15:37:28	0.396305	0.396115	4.18562	7.53402	18.0373	18.0709	23.939	29.5122	44.1888	50.367	57.9896	55.5636	55.6136	55.7552	51.1959	34.8196	12.5196	26.5415
1899-12-31 15:37:29	0.396836	0.395951	4.18775	7.53764	18.0453	18.078	23.953	29.5301	44.2166	50.4051	58.0269	55.6055	55.6562	55.7949	51.2295	34.8378	12.5278	26.5544
1899-12-31 15:37:30	0.396658	0.395893	4.18892	7.54018	18.0512	18.085	23.9636	29.5447	44.2407	50.4378	58.0564	55.6346	55.6852	55.8262	51.2509	34.8484	12.5314	26.5597
1899-12-31 15:37:31	0.397339	0.395596	4.19119	7.54369	18.0601	18.094	23.9786	29.5641	44.2784	50.4804	58.1132	55.6799	55.7322	55.8728	51.2952	34.8757	12.5426	26.5807
1899-12-31 15:37:32	0.397267	0.395889	4.19271	7.54587	18.0669	18.0989	23.9869	29.573	44.2957	50.4922	58.1316	55.6957	55.7421	55.8845	51.2975	34.8687	12.541	26.5744
1899-12-31 15:37:33	0.397835	0.396017	4.19388	7.54806	18.0703	18.1043	23.9918	29.5809	44.3028	50.5024	58.1415	55.6975	55.746	55.8864	51.292	34.8581	12.5381	26.5631
1899-12-31 15:37:34	0.397957	0.397738	4.19605	7.55188	18.0806	18.1154	24.0097	29.6023	44.3351	50.543	58.1956	55.7505	55.8	55.9374	51.3419	34.888	12.5501	26.5854
1899-12-31 15:37:35	0.398205	0.396758	4.19856	7.5557	18.0904	18.123	24.0272	29.6252	44.3718	50.5885	58.2485	55.8113	55.8574	55.9991	51.3926	34.9181	12.5627	26.6098
1899-12-31 15:37:36	0.398024	0.397586	4.19977	7.55784	18.0949	18.127	24.0317	29.6323	44.3826	50.5954	58.251	55.811	55.854	55.9963	51.3807	34.9021	12.5564	26.5927
1899-12-31 15:37:37	0.398651	0.397691	4.20122	7.56063	18.101	18.1332	24.0432	29.6468	44.4058	50.6328	58.2805	55.8432	55.8849	56.0238	51.4033	34.9116	12.5614	26.6
1899-12-31 15:37:38	0.398923	0.397359	4.20339	7.56418	18.1099	18.1437	24.0588	29.668	44.4362	50.6693	58.3321	55.8958	55.9382	56.0679	51.4444	34.9371	12.5728	26.619
1899-12-31 15:37:39	0.399304	0.398239	4.20529	7.56717	18.1177	18.1514	24.0728	29.6852	44.4645	50.7035	58.3728	55.9299	55.9744	56.1079	51.4734	34.951	12.5778	26.6267
1899-12-31 15:37:40	0.399382	0.398617	4.20734	7.5705	18.1267	18.1611	24.0875	29.7054	44.4994	50.736	58.4206	55.9763	56.0224	56.1515	51.5164	34.9761	12.5864	26.6441
1899-12-31 15:37:41	0.399454	0.39892	4.20856	7.57284	18.1319	18.1664	24.096	29.7155	44.5135	50.7497	58.4361	55.9883	56.0324	56.164	51.5197	34.9712	12.5856	26.6386
1899-12-31 15:37:42	0.399765	0.398549	4.21063	7.57552	18.1392	18.1742	24.108	29.7308	44.5343	50.7791	58.4635	56.0203	56.0646	56.2019	51.5442	34.9818	12.5891	26.6454
1899-12-31 15:37:43	0.39996	0.399049	4.21203	7.57927	18.1469	18.1806	24.1192	29.747	44.5582	50.8108	58.5044	56.0576	56.1003	56.2412	51.5753	34.998	12.596	26.6566
1899-12-31 15:37:44	0.400235	0.398649	4.21387	7.5819	18.1536	18.189	24.1329	29.764	44.5793	50.8434	58.546	56.0926	56.1327	56.2811	51.6073	35.0154	12.6039	26.6687
1899-12-31 15:37:45	0.40035	0.398685	4.21524	7.5843	18.1587	18.1931	24.138	29.7721	44.5908	50.8529	58.5594	56.1024	56.1416	56.2861	51.6072	35.008	12.6027	26.6618
1899-12-31 15:37:46	0.400522	0.399255	4.21744	7.58722	18.1671	18.202	24.1505	29.7888	44.6169	50.8842	58.6072	56.1388	56.1832	56.3186	51.6418	35.0293	12.6114	26.6778
1899-12-31 15:37:47	0.400863	0.399623	4.21886	7.58999	18.1725	18.2081	24.1605	29.8008	44.6393	50.9053	58.6339	56.1622	56.21	56.3488	51.6612	35.0392	12.6164	26.6836
1899-12-31 15:37:48	0.401171	0.400254	4.22016	7.59253	18.1782	18.2133	24.1698	29.8125	44.658	50.9264	58.6598	56.1886	56.2338	56.3698	51.6805	35.0488	12.621	26.6896
1899-12-31 15:37:49	0.401632	0.400327	4.22183	7.59512	18.184	18.2189	24.1779	29.8241	44.6785	50.9487	58.6806	56.2152	56.2534	56.3892	51.6992	35.0581	12.6247	26.6948
1899-12-31 15:37:50	0.401195	0.401507	4.22335	7.59782	18.1901	18.2256	24.189	29.8366	44.6952	50.9695	58.7003	56.2414	56.2758	56.4122	51.716	35.0628	12.628	26.6987
1899-12-31 15:37:51	0.401782	0.399441	4.22522	7.60067	18.1973	18.2312	24.1986	29.8512	44.721	51.0028	58.7326	56.2712	56.3031	56.4489	51.7379	35.0747	12.6343	26.7054
1899-12-31 15:37:52	0.401924	0.401011	4.22686	7.60307	18.2038	18.2379	24.2075	29.8623	44.7348	51.0148	58.7522	56.2857	56.3151	56.4602	51.7449	35.074	12.6359	26.7037
1899-12-31 15:37:53	0.402232	0.401437	4.22849	7.60651	18.2128	18.2468	24.2222	29.8822	44.7661	51.055	58.8052	56.3378	56.3684	56.5154	51.7901	35.1037	12.6475	26.7252
1899-12-31 15:37:54	0.402427	0.401375	4.23023	7.60967	18.219	18.2534	24.2329	29.8961	44.7846	51.081	58.8349	56.361	56.3885	56.532	51.8062	35.1064	12.65	26.7256
1899-12-31 15:37:55	0.402971	0.400535	4.23205	7.61239	18.2269	18.2611	24.2453	29.9123	44.8108	51.1119	58.8662	56.3934	56.4276	56.5646	51.8342	35.12	12.6556	26.7357
1899-12-31 15:37:56	0.402364	0.402095	4.2335	7.61463	18.2323	18.2667	24.2523	29.9208	44.8234	51.1277	58.879	56.4018	56.4335	56.5726	51.8322	35.1121	12.6542	26.7275
1899-12-31 15:37:57	0.403031	0.402311	4.23542	7.61766	18.24	18.2743	24.266	29.9403	44.8513	51.1631	58.9189	56.4476	56.4809	56.6178	51.8718	35.1365	12.6618	26.745
1899-12-31 15:37:58	0.403422	0.402334	4.23712	7.6203	18.2465	18.2805	24.275	29.9511	44.8701	51.177	58.9376	56.4659	56.4947	56.6333	51.8777	35.1328	12.6604	26.7411
1899-12-31 15:37:59	0.403597	0.402537	4.23904	7.62308	18.2536	18.2882	24.2875	29.9668	44.8941	51.2126	58.9744	56.4997	56.5263	56.6722	51.9066	35.1499	12.6681	26.7524
1899-12-31 15:38:00	0.403835	0.40224	4.24036	7.62525	18.2584	18.2927	24.2922	29.9754	44.9091	51.2235	58.9932	56.512	56.5387	56.6874	51.9109	35.1474	12.6674	26.7488
1899-12-31 15:39:15	0.417695	0.41371	4.34805	7.79885	18.6413	18.6741	24.8451	30.6728	45.9942	52.4704	60.4168	57.8543	57.8707	58.0073	52.9472	35.6858	12.953	27.1088
1899-12-31 15:39:16	0.419467	0.418181	4.35021	7.80139	18.6467	18.6815	24.8568	30.6888	46.0088	52.501	60.4534	57.8947	57.8983	58.0386	52.988	35.7053	12.9584	27.1244
1899-12-31 15:39:17	0.419968	0.417716	4.35191	7.80478	18.6532	18.6893	24.8662	30.6998	46.0213	52.5187	60.4706	57.9145	57.9155	58.0567	53.0003	35.7096	12.961	27.1273
1899-12-31 15:39:18	0.419889	0.418098	4.35323	7.80668	18.6579	18.6927	24.8719	30.7083	46.0292	52.534	60.4853	57.9247	57.9263	58.0652	53.007	35.7111	12.9633	27.1282
1899-12-31 15:39:19	0.420314	0.419577	4.35513	7.81006	18.666	18.7007	24.8842	30.7235	46.0599	52.5629	60.5308	57.9633	57.9652	58.1054	53.0436	35.7347	12.9737	27.1453
1899-12-31 15:39:20	0.420528	0.419803	4.35662	7.81234	18.6696	18.7056	24.8903	30.7315	46.0684	52.5741	60.5439	57.9751	57.9755	58.112	53.0498	35.7365	12.9781	27.145
1899-12-31 15:39:21	0.420577	0.420156	4.35799	7.81408	18.6739	18.7088	24.8951	30.7366	46.0782	52.5849	60.552	57.9769	57.9782	58.1166	53.0451	35.7297	12.9757	27.1384
1899-12-31 15:39:22	0.420638	0.41933	4.35992	7.81699	18.6811	18.7156	24.906	30.7505	46.1025	52.6061	60.589	58.0096	58.0107	58.1494	53.0756	35.7477	12.9815	27.1516
1899-12-31 15:39:23	0.42077	0.420901	4.36119	7.81929	18.6865	18.7216	24.9133	30.7599	46.1181	52.6216	60.6003	58.0178	58.0209	58.1559	53.0803	35.7474	12.9822	27.1507
1899-12-31 15:39:24	0.421074	0.420121	4.36271	7.82199	18.6926	18.7271	24.9218	30.7726	46.1397	52.6471	60.6329	58.0474	58.0524	58.1843	53.1072	35.7624	12.9894	27.1607
1899-12-31 15:39:25	0.421548	0.420202	4.36454	7.82474	18.6991	18.7354	24.9325	30.786	46.164	52.666	60.6575	58.0745	58.0775	58.2116	53.1296	35.7774	12.9962	27.1708
1899-12-31 15:39:26	0.421823	0.421226	4.36573	7.82694	18.7044	18.7392	24.9415	30.7956	46.1804	52.68	60.672	58.0914	58.0923	58.2268	53.1417	35.7822	12.9998	27.1733
1899-12-31 15:39:27	0.421685	0.420152	4.36743	7.82909	18.7083	18.7452	24.9478	30.8027	46.1943	52.6942	60.6853	58.1015	58.1053	58.2413	53.1485	35.7839	13.0031	27.1737
1899-12-31 15:39:28	0.421976	0.420859	4.3691	7.83206	18.7166	18.7501	24.9611	30.8199	46.2247	52.7284	60.7257	58.1472	58.1448	58.2826	53.1882	35.8101	13.0153	27.1942
1899-12-31 15:39:29	0.42251	0.421533	4.37027	7.8347	18.7194	18.7548	24.964	30.8241	46.2315	52.736	60.7352	58.1541	58.1541	58.2919	53.1912	35.8104	13.0165	27.1949
1899-12-31 15:39:30	0.422289	0.422037	4.37149	7.83545	18.7221	18.7597	24.9664	30.8244	46.2314	52.7307	60.7242	58.143	58.1396	58.2751	53.1733	35.7955	13.0116	27.1808
1899-12-31 15:39:31	0.422543	0.421585	4.37226	7.83857	18.7267	18.7621	24.9738	30.8345	46.2478	52.751	60.7474	58.1664	58.1621	58.3041	53.1937	35.8081	13.0181	27.1905
1899-12-31 15:39:32	0.422628	0.422145	4.37391	7.84045	18.7309	18.7674	24.9787	30.8417	46.2587	52.7593	60.7639	58.1753	58.172	58.3148	53.201	35.8108	13.0213	27.1929
1899-12-31 15:39:33	0.422999	0.421811	4.37546	7.84301	18.7356	18.7717	24.9864	30.8505	46.2685	52.7756	60.7852	58.1939	58.1907	58.3302	53.2148	35.8175	13.0264	27.1985
1899-12-31 15:39:34	0.423257	0.42244	4.37632	7.84433	18.7389	18.775	24.9884	30.8527	46.2702	52.7743	60.7821	58.1879	58.1869	58.3316	53.2063	35.8098	13.0234	27.1919
1899-12-31 15:39:35	0.423305	0.423393	4.37772	7.8467	18.744	18.7794	24.9955	30.8601	46.2835	52.7879	60.794	58.1998	58.1974	58.3472	53.2173	35.8142	13.0264	27.1953
1899-12-31 15:39:36	0.423643	0.423148	4.3795	7.84898	18.7491	18.7855	25.0021	30.8695	46.2888	52.8057	60.8141	58.2192	58.217	58.3623	53.2331	35.8227	13.0316	27.2023
1899-12-31 15:39:37	0.423857	0.422524	4.38009	7.85079	18.7517	18.7875	25.0061	30.8736	46.2941	52.8103	60.8221	58.2231	58.2211	58.3661	53.2327	35.8212	13.0305	27.1995
1899-12-31 15:39:38	0.424159	0.423043	4.38151	7.8528	18.7571	18.7926	25.0137	30.8849	46.3051	52.8259	60.8404	58.2391	58.2441	58.3894	53.2509	35.8325	13.0341	27.2091
1899-12-31 15:39:38	0.424127	0.423642	4.38343	7.8557	18.7626	18.7989	25.0238	30.8969	46.3271	52.8541	60.8663	58.2701	58.2756	58.4177	53.2799	35.8521	13.0419	27.2226
1899-12-31 15:39:39	0.424365	0.423245	4.38465	7.85743	18.7666	18.8027	25.0275	30.9011	46.3324	52.8564	60.8705	58.2692	58.2764	58.4226	53.278	35.8474	13.0404	27.2182
1899-12-31 15:39:40	0.424423	0.423723	4.38605	7.85952	18.7721	18.807	25.0357	30.9105	46.3475	52.8749	60.89	58.2902	58.2963	58.4403	53.2945	35.8592	13.0456	27.2265
1899-12-31 15:39:41	0.424488	0.424251	4.38762	7.86202	18.7766	18.8118	25.0416	30.9183	46.3622	52.8996	60.9057	58.3103	58.3141	58.4571	53.312	35.8696	13.0505	27.235
1899-12-31 15:39:42	0.425015	0.42349	4.38889	7.86421	18.7804	18.8162	25.0486	30.9276	46.3788	52.9071	60.9232	58.3306	58.3318	58.4724	53.329	35.8831	13.055	27.2446
1899-12-31 15:39:43	0.42524	0.423699	4.38948	7.86535	18.7831	18.818	25.0508	30.9288	46.3779	52.9049	60.9254	58.331	58.3323	58.4678	53.3289	35.8839	13.0547	27.2453
1899-12-31 15:39:44	0.425278	0.424441	4.39068	7.86672	18.7846	18.8201	25.0517	30.9289	46.3797	52.9056	60.9218	58.3246	58.3286	58.4678	53.325	35.8801	13.0537	27.242
1899-12-31 15:39:45	0.4253	0.423241	4.39117	7.86699	18.7834	18.8206	25.048	30.9217	46.3655	52.8865	60.8966	58.2968	58.3027	58.44	53.298	35.8594	13.0471	27.2275
1899-12-31 15:39:46	0.42585	0.425141	4.39229	7.86869	18.7864	18.8225	25.0499	30.9256	46.3711	52.8956	60.9048	58.3058	58.3129	58.4516	53.3078	35.8703	13.0518	27.236
1899-12-31 15:39:47	0.425616	0.424321	4.3928	7.87019	18.7884	18.8258	25.0531	30.9295	46.3764	52.9029	60.9126	58.3191	58.3233	58.4583	53.3241	35.8837	13.0575	27.2481
1899-12-31 15:39:48	0.425787	0.424884	4.39344	7.87092	18.7878	18.8238	25.0499	30.9234	46.3647	52.892	60.8989	58.2985	58.3057	58.4441	53.3067	35.8753	13.0547	27.2417
1899-12-31 15:39:49	0.426145	0.425452	4.39408	7.87133	18.7878	18.8234	25.0454	30.9166	46.3544	52.8764	60.8803	58.2773	58.2854	58.4294	53.2897	35.8644	13.0511	27.2341
1899-12-31 15:39:50	0.426306	0.424874	4.39523	7.87269	18.7889	18.8261	25.0473	30.9188	46.3614	52.878	60.8828	58.2837	58.292	58.4369	53.2999	35.8749	13.0549	27.2428
1899-12-31 15:39:51	0.426687	0.424829	4.39557	7.87315	18.7891	18.8245	25.0423	30.9116	46.3449	52.8569	60.8631	58.2601	58.2695	58.4115	53.2775	35.8598	13.05	27.2325
1899-12-31 15:39:52	0.426842	0.425164	4.39621	7.87426	18.7894	18.8255	25.0422	30.9099	46.3431	52.848	60.8601	58.2534	58.2643	58.4096	53.2776	35.8625	13.0536	27.2368
1899-12-31 15:39:53	0.427093	0.425834	4.39738	7.87587	18.7917	18.8287	25.0424	30.9125	46.345	52.8599	60.8634	58.2619	58.274	58.4156	53.2885	35.8743	13.0587	27.2457
1899-12-31 15:39:54	0.426859	0.426195	4.39779	7.87649	18.7915	18.8284	25.0416	30.9073	46.3361	52.8496	60.8508	58.2482	58.2581	58.3993	53.2756	35.8686	13.0563	27.2417
1899-12-31 15:39:55	0.426764	0.426664	4.39914	7.8778	18.7934	18.8297	25.0419	30.9071	46.3361	52.844	60.8473	58.2467	58.2574	58.3959	53.2751	35.8682	13.0573	27.2424
1899-12-31 15:39:56	0.427235	0.426298	4.3998	7.87857	18.7942	18.8298	25.041	30.9059	46.332	52.8389	60.8378	58.2377	58.2475	58.3881	53.2681	35.8638	13.0583	27.24
1899-12-31 15:39:57	0.427506	0.426011	4.40067	7.88022	18.796	18.833	25.0412	30.9061	46.3303	52.8349	60.8356	58.2339	58.2404	58.3845	53.2622	35.8615	13.0576	27.2381
1899-12-31 15:39:58	0.427288	0.42584	4.40136	7.88079	18.7975	18.8335	25.041	30.9045	46.3308	52.8284	60.8268	58.2263	58.2313	58.379	53.2541	35.8554	13.0577	27.2337
1899-12-31 15:39:59	0.427862	0.425997	4.40235	7.88286	18.7994	18.8357	25.0443	30.9085	46.3372	52.8384	60.8334	58.2342	58.2436	58.385	53.2663	35.8656	13.0629	27.2426
1899-12-31 15:40:00	0.427571	0.426468	4.40315	7.88491	18.8023	18.8388	25.0455	30.9106	46.3381	52.841	60.8406	58.2362	58.2471	58.3923	53.2693	35.8691	13.0639	27.2466
1899-12-31 15:41:15	0.445222	0.441254	4.5195	8.07159	19.2175	19.2519	25.6442	31.6692	47.4847	54.1831	62.3249	59.6361	59.5996	59.7344	54.3267	36.399	13.3139	27.5965
1899-12-31 15:41:16	0.444965	0.443891	4.52181	8.07496	19.2264	19.263	25.6637	31.688	47.5258	54.2041	62.3644	59.6739	59.6465	59.7791	54.364	36.4245	13.3263	27.6193
1899-12-31 15:41:17	0.445057	0.44378	4.52416	8.07856	19.2338	19.2708	25.6736	31.7015	47.5445	54.2261	62.3891	59.6955	59.6657	59.7978	54.3728	36.4233	13.3286	27.6179
1899-12-31 15:41:18	0.444993	0.44534	4.52565	8.0816	19.2402	19.2772	25.6838	31.7145	47.5624	54.2475	62.4202	59.7189	59.6949	59.825	54.3963	36.4381	13.3373	27.6287
1899-12-31 15:41:19	0.445733	0.444864	4.52755	8.08383	19.2456	19.2833	25.6912	31.7246	47.5758	54.2652	62.4365	59.7339	59.7145	59.8455	54.4101	36.447	13.3399	27.6346
1899-12-31 15:41:20	0.445882	0.445421	4.52857	8.08625	19.2501	19.2862	25.6972	31.7316	47.5839	54.2793	62.4481	59.7408	59.7214	59.855	54.4144	36.4472	13.3414	27.6346
1899-12-31 15:41:21	0.44619	0.445143	4.53012	8.08867	19.2561	19.2929	25.7061	31.7423	47.5926	54.2925	62.468	59.7599	59.7392	59.8758	54.4303	36.4567	13.3457	27.6411
1899-12-31 15:41:22	0.446275	0.44459	4.53159	8.09076	19.2605	19.2974	25.7128	31.7504	47.6031	54.3077	62.4857	59.7715	59.75	59.8936	54.4378	36.4613	13.347	27.6437
1899-12-31 15:41:23	0.446331	0.444957	4.53318	8.09313	19.2653	19.3029	25.7199	31.7589	47.6171	54.3208	62.5034	59.7902	59.7697	59.906	54.4575	36.4731	13.3524	27.6522
1899-12-31 15:41:24	0.446204	0.445118	4.53382	8.09425	19.2673	19.3058	25.7202	31.759	47.6205	54.3166	62.4953	59.7826	59.7581	59.9013	54.4455	36.4654	13.3514	27.6454
1899-12-31 15:41:25	0.446721	0.445599	4.53504	8.0963	19.2704	19.3069	25.7228	31.7601	47.6201	54.3175	62.4962	59.7801	59.7571	59.8954	54.4416	36.4623	13.3526	27.6438
1899-12-31 15:41:26	0.446996	0.446115	4.53621	8.09768	19.2731	19.3098	25.7257	31.7629	47.6244	54.3218	62.499	59.7817	59.7604	59.8995	54.445	36.4634	13.3531	27.6448
1899-12-31 15:41:27	0.447005	0.446094	4.53753	8.10012	19.2775	19.3146	25.7302	31.7697	47.6354	54.3351	62.5146	59.7977	59.7733	59.9179	54.4607	36.4756	13.3585	27.6543
1899-12-31 15:41:28	0.447297	0.446629	4.53888	8.10195	19.28	19.3173	25.7352	31.775	47.6471	54.3418	62.5238	59.8117	59.7872	59.9256	54.4743	36.4865	13.3625	27.6627
1899-12-31 15:41:29	0.447445	0.446221	4.53972	8.10323	19.2832	19.3195	25.7352	31.7748	47.6443	54.3415	62.5208	59.8032	59.7788	59.9176	54.4646	36.4777	13.3616	27.657
1899-12-31 15:41:30	0.447488	0.446381	4.54063	8.10532	19.2863	19.3241	25.7397	31.781	47.6518	54.3467	62.5265	59.8149	59.7886	59.9325	54.4747	36.4842	13.3634	27.6617
1899-12-31 15:41:31	0.44752	0.446773	4.54261	8.10731	19.2902	19.3279	25.7449	31.7871	47.6596	54.3597	62.5362	59.8296	59.804	59.9448	54.49	36.4952	13.3676	27.669
1899-12-31 15:41:32	0.447259	0.446728	4.54335	8.10865	19.2931	19.3287	25.7477	31.7911	47.6681	54.366	62.537	59.829	59.8014	59.9485	54.4853	36.4908	13.3665	27.6658
1899-12-31 15:41:33	0.448485	0.44651	4.54464	8.11137	19.2976	19.3349	25.755	31.8002	47.6829	54.3775	62.552	59.8451	59.8193	59.9625	54.4976	36.4961	13.3689	27.6698
1899-12-31 15:41:34	0.448621	0.446822	4.54571	8.11347	19.3019	19.3403	25.76	31.807	47.6885	54.3849	62.5582	59.85	59.8243	59.9631	54.4964	36.4922	13.3675	27.6655
1899-12-31 15:41:35	0.448975	0.447894	4.54837	8.1168	19.3114	19.3496	25.7758	31.8263	47.7241	54.4215	62.6104	59.8971	59.8684	60.0035	54.5395	36.5215	13.3808	27.6859
1899-12-31 15:41:36	0.448871	0.446829	4.54996	8.12029	19.3189	19.3556	25.787	31.8423	47.7508	54.4526	62.6502	59.9304	59.9015	60.041	54.5719	36.5392	13.3901	27.6996
1899-12-31 15:41:37	0.44912	0.448218	4.55153	8.12266	19.3254	19.3636	25.7993	31.8554	47.7678	54.4766	62.6805	59.9566	59.9285	60.0626	54.5929	36.5491	13.3958	27.7071
1899-12-31 15:41:38	0.449464	0.448561	4.55356	8.12599	19.3312	19.3698	25.8069	31.8673	47.7918	54.4929	62.7046	59.9782	59.9502	60.0933	54.609	36.5587	13.4005	27.7131
1899-12-31 15:41:39	0.449433	0.447981	4.55521	8.12858	19.3374	19.3759	25.8183	31.8808	47.8092	54.5216	62.7339	60.0032	59.9753	60.1127	54.6298	36.5697	13.4063	27.7209
1899-12-31 15:41:40	0.449921	0.449288	4.55693	8.13236	19.3471	19.3855	25.8332	31.9004	47.8354	54.557	62.7808	60.0553	60.0244	60.159	54.6727	36.5984	13.4182	27.7418
1899-12-31 15:41:41	0.44981	0.449514	4.55863	8.13436	19.3511	19.3892	25.839	31.907	47.8421	54.5614	62.7815	60.0542	60.0232	60.1591	54.6646	36.5874	13.4151	27.7327
1899-12-31 15:41:42	0.450328	0.449853	4.5606	8.13779	19.3611	19.3985	25.852	31.9265	47.8708	54.6005	62.8265	60.1039	60.0733	60.2088	54.7091	36.6163	13.4279	27.7552
1899-12-31 15:41:43	0.450733	0.448938	4.56169	8.13967	19.3644	19.4012	25.8583	31.9311	47.8741	54.6084	62.8283	60.1018	60.0712	60.1996	54.6986	36.6041	13.4238	27.7434
1899-12-31 15:41:44	0.450728	0.448692	4.56352	8.14204	19.369	19.4079	25.8639	31.9396	47.8853	54.6222	62.8381	60.1125	60.0782	60.2158	54.7004	36.6002	13.4242	27.7394
1899-12-31 15:41:45	0.45094	0.449953	4.56478	8.14433	19.3739	19.4105	25.87	31.948	47.902	54.6323	62.8518	60.1202	60.0872	60.2148	54.7024	36.5964	13.4223	27.7351
1899-12-31 15:41:46	0.451548	0.450065	4.56681	8.14694	19.3814	19.4189	25.8817	31.9631	47.9257	54.6633	62.8866	60.1554	60.1203	60.2521	54.7318	36.6182	13.4302	27.7506
1899-12-31 15:41:47	0.45159	0.449783	4.56828	8.15034	19.3886	19.4261	25.8934	31.9782	47.9484	54.6895	62.923	60.1902	60.1519	60.285	54.7616	36.6356	13.4369	27.7636
1899-12-31 15:41:48	0.451592	0.450144	4.56962	8.15275	19.3933	19.4316	25.8993	31.9851	47.959	54.7035	62.9369	60.2007	60.1572	60.294	54.7658	36.6366	13.4387	27.763
1899-12-31 15:41:49	0.451924	0.450807	4.57152	8.15559	19.3994	19.4365	25.9078	31.9972	47.9812	54.7254	62.963	60.2295	60.1845	60.32	54.7914	36.6512	13.445	27.774
1899-12-31 15:41:50	0.452272	0.451472	4.57226	8.15701	19.4013	19.4409	25.9111	32.0003	47.9881	54.7263	62.9657	60.2302	60.1873	60.3245	54.791	36.6489	13.4471	27.772
1899-12-31 15:41:50	0.452437	0.451043	4.57366	8.15908	19.4072	19.4448	25.9194	32.0084	48.0017	54.7458	62.9832	60.2451	60.2047	60.3379	54.8053	36.6574	13.4507	27.7791
1899-12-31 15:41:51	0.452802	0.451959	4.57546	8.16275	19.414	19.4524	25.9313	32.0255	48.0265	54.7777	63.0229	60.2813	60.2482	60.3787	54.8467	36.686	13.4645	27.8007
1899-12-31 15:41:52	0.452887	0.451695	4.57683	8.16424	19.4189	19.4561	25.9362	32.0314	48.0409	54.7884	63.0345	60.2919	60.2607	60.3883	54.8572	36.693	13.4688	27.8057
1899-12-31 15:41:53	0.453225	0.452442	4.57792	8.16676	19.4229	19.4605	25.9407	32.0378	48.0479	54.7983	63.041	60.3003	60.2679	60.3937	54.8607	36.6942	13.4714	27.8062
1899-12-31 15:41:54	0.453237	0.451999	4.57941	8.16832	19.4268	19.4644	25.9466	32.0438	48.0551	54.8104	63.0478	60.3089	60.2725	60.4056	54.8652	36.6949	13.4731	27.806
1899-12-31 15:41:55	0.453728	0.452602	4.58136	8.1706	19.4343	19.4702	25.9551	32.0572	48.0753	54.8355	63.0734	60.3349	60.3015	60.4232	54.889	36.7104	13.4804	27.8169
1899-12-31 15:41:56	0.45383	0.452535	4.58276	8.17296	19.438	19.4738	25.962	32.0629	48.0846	54.8514	63.081	60.3413	60.3015	60.4272	54.8873	36.7043	13.4786	27.8121
1899-12-31 15:41:57	0.453903	0.45206	4.58385	8.17539	19.4432	19.4811	25.9685	32.0716	48.0964	54.8687	63.098	60.3532	60.3165	60.4391	54.895	36.7042	13.4813	27.8113
1899-12-31 15:41:58	0.454227	0.4523	4.58575	8.1786	19.4494	19.4872	25.9784	32.0845	48.1124	54.8962	63.1221	60.375	60.3401	60.4648	54.9106	36.7134	13.4859	27.8156
1899-12-31 15:41:59	0.453811	0.452809	4.58692	8.1805	19.453	19.4894	25.9813	32.0889	48.1169	54.8971	63.1247	60.3743	60.3361	60.463	54.9008	36.7015	13.4818	27.8063
1899-12-31 15:43:15	0.471142	0.465382	4.6938	8.34749	19.7995	19.8372	26.447	32.6612	48.9661	55.8648	64.1889	61.3594	61.3214	61.4415	55.7012	37.1665	13.7383	28.1315
1899-12-31 15:43:16	0.470887	0.47019	4.69491	8.34798	19.7996	19.8376	26.4454	32.6564	48.9558	55.8309	64.1674	61.3438	61.2931	61.4239	55.6726	37.1403	13.7313	28.1168
1899-12-31 15:43:17	0.471	0.47082	4.69701	8.35106	19.8053	19.8441	26.4549	32.6664	48.969	55.8449	64.1887	61.3687	61.3155	61.4448	55.6929	37.1536	13.7404	28.1275
1899-12-31 15:43:18	0.471011	0.47069	4.69812	8.35366	19.8086	19.8493	26.4595	32.6735	48.9798	55.8617	64.1984	61.3756	61.3223	61.4548	55.6973	37.156	13.7441	28.129
1899-12-31 15:43:19	0.471766	0.471582	4.69933	8.35479	19.8122	19.851	26.4618	32.6771	48.981	55.8606	64.2017	61.3773	61.3213	61.4537	55.6954	37.1514	13.7435	28.1263
1899-12-31 15:43:20	0.472006	0.470551	4.70095	8.35699	19.8164	19.8554	26.4666	32.6837	48.9898	55.8725	64.2112	61.3874	61.3292	61.4627	55.6992	37.1523	13.7437	28.1262
1899-12-31 15:43:21	0.471986	0.471591	4.70234	8.35994	19.8217	19.8595	26.4738	32.6919	49.0014	55.8912	64.2246	61.4039	61.3429	61.4775	55.709	37.1564	13.7451	28.1285
1899-12-31 15:43:22	0.472502	0.471393	4.70391	8.36296	19.8289	19.8671	26.4868	32.7087	49.0331	55.919	64.2596	61.4396	61.3832	61.5074	55.7466	37.181	13.755	28.1477
1899-12-31 15:43:23	0.472625	0.47093	4.70578	8.36576	19.8356	19.8745	26.4972	32.7212	49.0535	55.9428	64.2859	61.4693	61.4126	61.5325	55.7692	37.1934	13.7613	28.1574
1899-12-31 15:43:24	0.472792	0.47274	4.70767	8.36793	19.8408	19.879	26.504	32.7289	49.0607	55.96	64.2991	61.4802	61.4211	61.5451	55.7747	37.1966	13.7631	28.1586
1899-12-31 15:43:25	0.473002	0.472106	4.70951	8.37109	19.8475	19.8869	26.5156	32.7425	49.0845	55.9786	64.3337	61.5143	61.4542	61.5789	55.8087	37.2198	13.7706	28.1768
1899-12-31 15:43:26	0.473238	0.472493	4.7097	8.37203	19.8484	19.8866	26.5127	32.7399	49.0818	55.9686	64.3139	61.4938	61.4317	61.5541	55.7802	37.1979	13.7625	28.1591
1899-12-31 15:43:27	0.473488	0.471909	4.71136	8.37394	19.8524	19.8914	26.518	32.747	49.0916	55.9733	64.3289	61.5088	61.4473	61.5696	55.7959	37.208	13.7669	28.1675
1899-12-31 15:43:28	0.473705	0.471811	4.7127	8.37629	19.8567	19.8956	26.524	32.754	49.1015	55.9851	64.344	61.5241	61.4612	61.5824	55.8113	37.2198	13.7712	28.176
1899-12-31 15:43:29	0.474084	0.472441	4.71389	8.37854	19.861	19.8988	26.5284	32.7599	49.113	55.9997	64.3555	61.5296	61.4701	61.5937	55.8183	37.2236	13.774	28.179
1899-12-31 15:43:30	0.473922	0.47349	4.71503	8.3796	19.8623	19.9016	26.5293	32.7605	49.112	55.9989	64.35	61.5273	61.4652	61.5855	55.8124	37.2187	13.7724	28.1752
1899-12-31 15:43:31	0.473749	0.472196	4.71579	8.38166	19.8666	19.9058	26.5367	32.7671	49.1225	56.0149	64.3638	61.5368	61.4794	61.6021	55.8251	37.2279	13.777	28.1817
1899-12-31 15:43:32	0.474072	0.473273	4.71774	8.38427	19.8729	19.9098	26.5456	32.7796	49.1409	56.0315	64.3919	61.5585	61.5018	61.6269	55.8471	37.242	13.7837	28.1927
1899-12-31 15:43:33	0.474582	0.473064	4.7192	8.38677	19.8764	19.9157	26.5492	32.7842	49.149	56.0381	64.3999	61.5643	61.5068	61.6298	55.8467	37.2403	13.7812	28.1902
1899-12-31 15:43:34	0.475024	0.473454	4.72069	8.38869	19.8814	19.921	26.5592	32.7959	49.1688	56.067	64.4269	61.5855	61.533	61.6555	55.8711	37.2564	13.7905	28.2025
1899-12-31 15:43:35	0.474915	0.474575	4.72171	8.39073	19.8854	19.9223	26.5627	32.7991	49.1728	56.0673	64.4255	61.5865	61.5342	61.6557	55.8654	37.2494	13.7889	28.197
1899-12-31 15:43:36	0.475118	0.474201	4.72307	8.39294	19.8905	19.9275	26.568	32.8064	49.1848	56.0797	64.4384	61.5978	61.539	61.6654	55.8689	37.2491	13.7889	28.196
1899-12-31 15:43:37	0.475451	0.473892	4.72494	8.39518	19.8966	19.9339	26.5759	32.8165	49.1983	56.093	64.4549	61.6103	61.5559	61.6765	55.8789	37.253	13.7901	28.198
1899-12-31 15:43:37	0.476027	0.474947	4.72653	8.39768	19.9014	19.939	26.5834	32.827	49.2088	56.1113	64.4739	61.6272	61.5698	61.6972	55.8907	37.2573	13.7921	28.2001
1899-12-31 15:43:38	0.4762	0.474444	4.72807	8.40017	19.9067	19.9453	26.5924	32.8387	49.2245	56.1319	64.4993	61.6517	61.5932	61.7209	55.9098	37.2677	13.7984	28.2088
1899-12-31 15:43:39	0.476294	0.475001	4.72949	8.40236	19.9116	19.9493	26.5995	32.8453	49.2321	56.1394	64.5108	61.6583	61.6027	61.7271	55.9129	37.2667	13.7997	28.207
1899-12-31 15:43:40	0.476477	0.474678	4.73143	8.40534	19.9179	19.9576	26.6084	32.8586	49.2532	56.1628	64.535	61.688	61.6289	61.7575	55.9349	37.2784	13.8059	28.2167
1899-12-31 15:43:41	0.47669	0.475546	4.73305	8.40835	19.9245	19.9633	26.6189	32.8713	49.2701	56.1852	64.5575	61.7143	61.6557	61.7911	55.962	37.2962	13.8136	28.2295
1899-12-31 15:43:42	0.477073	0.475443	4.73374	8.40941	19.9271	19.9661	26.6199	32.8728	49.2692	56.1832	64.5565	61.7099	61.6505	61.7768	55.9491	37.2847	13.8086	28.2202
1899-12-31 15:43:43	0.476994	0.475598	4.73558	8.41257	19.9321	19.9694	26.629	32.8832	49.2846	56.1981	64.572	61.728	61.6694	61.799	55.967	37.2956	13.8152	28.228
1899-12-31 15:43:44	0.477463	0.47585	4.73624	8.41398	19.935	19.9735	26.6306	32.8859	49.288	56.2033	64.5764	61.7251	61.6662	61.7957	55.9618	37.2914	13.8145	28.2238
1899-12-31 15:43:45	0.47737	0.476657	4.73846	8.41646	19.9408	19.9795	26.6394	32.8947	49.3052	56.2148	64.5934	61.746	61.6881	61.8179	55.9812	37.3027	13.8208	28.2347
1899-12-31 15:43:46	0.477554	0.476731	4.73869	8.41783	19.9425	19.9805	26.6409	32.8982	49.3106	56.221	64.5985	61.7501	61.6933	61.8217	55.9842	37.306	13.8249	28.2371
1899-12-31 15:43:47	0.47794	0.477453	4.74018	8.41943	19.9455	19.9833	26.6443	32.9034	49.3139	56.2296	64.6091	61.762	61.7006	61.8284	55.9922	37.3114	13.8264	28.2401
1899-12-31 15:43:48	0.478293	0.477027	4.74178	8.42198	19.9507	19.9895	26.6511	32.9099	49.3287	56.2395	64.6298	61.781	61.7212	61.8508	56.0142	37.3292	13.8342	28.2537
1899-12-31 15:43:49	0.477977	0.477048	4.74289	8.42294	19.9523	19.9907	26.6521	32.9102	49.3296	56.2372	64.6203	61.772	61.7121	61.8413	56.0027	37.3193	13.8305	28.2472
1899-12-31 15:43:50	0.478387	0.47718	4.74425	8.42569	19.9572	19.9953	26.6593	32.9216	49.3548	56.2587	64.6501	61.8062	61.7433	61.8724	56.039	37.3485	13.843	28.2677
1899-12-31 15:43:51	0.478537	0.477906	4.74429	8.42574	19.9566	19.9945	26.6555	32.9151	49.3359	56.2425	64.6263	61.777	61.7156	61.8456	56.0076	37.3243	13.8359	28.2513
1899-12-31 15:43:52	0.478956	0.477542	4.74603	8.42852	19.9621	20.0015	26.6623	32.9249	49.3482	56.2606	64.6476	61.799	61.741	61.8686	56.0329	37.345	13.8443	28.265
1899-12-31 15:43:53	0.478913	0.478008	4.74669	8.42915	19.9626	20.0022	26.6624	32.9226	49.3473	56.2547	64.6401	61.7945	61.7308	61.8586	56.0248	37.3385	13.844	28.2632
1899-12-31 15:43:54	0.479263	0.478422	4.74727	8.4301	19.9627	20.0009	26.6575	32.9173	49.3365	56.2379	64.6165	61.7693	61.7087	61.8389	56	37.3207	13.8388	28.2494
1899-12-31 15:43:55	0.478954	0.477653	4.74856	8.43169	19.9654	20.0048	26.6617	32.9225	49.3447	56.2493	64.6273	61.7794	61.7186	61.8517	56.0115	37.331	13.8438	28.2567
1899-12-31 15:43:56	0.479713	0.479226	4.74983	8.43346	19.9697	20.0082	26.669	32.9296	49.3593	56.2624	64.6466	61.8015	61.7364	61.8695	56.0331	37.3479	13.851	28.2699
1899-12-31 15:43:57	0.480062	0.478478	4.7514	8.43587	19.9723	20.0104	26.6708	32.9309	49.3578	56.2639	64.6481	61.8045	61.7366	61.8641	56.0318	37.3472	13.8531	28.2696
1899-12-31 15:43:58	0.479833	0.479288	4.75226	8.43727	19.9759	20.0152	26.6737	32.9349	49.369	56.268	64.6501	61.8016	61.7408	61.8662	56.0346	37.3477	13.8547	28.2711
1899-12-31 15:43:59	0.480253	0.478669	4.7532	8.43846	19.9759	20.0151	26.6731	32.9316	49.3581	56.2573	64.6353	61.7836	61.7201	61.8476	56.0133	37.3333	13.8512	28.2594
1899-12-31 15:45:15	0.495504	0.498002	4.8593	8.60365	20.3149	20.3558	27.1305	33.5028	50.1894	57.2049	65.6552	62.7305	62.6494	62.7781	56.7538	37.7367	14.0882	28.5411
1899-12-31 15:45:16	0.497308	0.49591	4.86053	8.60716	20.3243	20.3636	27.1446	33.5152	50.2085	57.2179	65.692	62.7705	62.6913	62.8146	56.7873	37.7579	14.097	28.5605
1899-12-31 15:45:17	0.497567	0.495156	4.86224	8.61023	20.3315	20.37	27.1554	33.5294	50.2304	57.2366	65.721	62.7972	62.7186	62.8417	56.8088	37.771	14.1046	28.5695
1899-12-31 15:45:17	0.49757	0.496111	4.86453	8.612	20.3348	20.3784	27.1601	33.5331	50.2374	57.2417	65.7226	62.8002	62.719	62.8374	56.8053	37.766	14.1016	28.565
1899-12-31 15:45:18	0.497792	0.49686	4.86569	8.61549	20.3422	20.383	27.1721	33.5508	50.2626	57.274	65.7699	62.8429	62.7641	62.8839	56.8495	37.7941	14.1148	28.5898
1899-12-31 15:45:19	0.497701	0.497636	4.8669	8.61722	20.3453	20.3856	27.1745	33.5558	50.2713	57.2753	65.7761	62.848	62.7682	62.8942	56.855	37.7971	14.117	28.5915
1899-12-31 15:45:20	0.498362	0.497019	4.86838	8.61875	20.3492	20.3889	27.1794	33.5599	50.2745	57.2864	65.781	62.851	62.7699	62.8894	56.852	37.7931	14.1173	28.5878
1899-12-31 15:45:21	0.498724	0.497426	4.86966	8.62093	20.3527	20.3929	27.184	33.5661	50.2868	57.2951	65.7965	62.8655	62.7839	62.9048	56.8688	37.8044	14.1214	28.5963
1899-12-31 15:45:22	0.498511	0.497064	4.87095	8.62255	20.3561	20.3963	27.1876	33.5708	50.2939	57.304	65.8018	62.8713	62.7903	62.9105	56.87	37.8046	14.1223	28.5966
1899-12-31 15:45:23	0.498686	0.49743	4.87183	8.62456	20.3591	20.3993	27.192	33.5751	50.2958	57.3036	65.8066	62.87	62.7917	62.9092	56.8715	37.804	14.1231	28.5959
1899-12-31 15:45:24	0.498972	0.49885	4.87316	8.62697	20.3652	20.4035	27.2001	33.584	50.3143	57.3273	65.8284	62.8945	62.8138	62.9351	56.8921	37.8198	14.1292	28.6072
1899-12-31 15:45:25	0.499161	0.498572	4.87497	8.62909	20.3703	20.4111	27.2078	33.5948	50.3285	57.3397	65.8527	62.9195	62.8364	62.9579	56.9133	37.8338	14.135	28.6189
1899-12-31 15:45:26	0.499373	0.498846	4.87658	8.63149	20.3743	20.4158	27.214	33.6031	50.3414	57.3541	65.8661	62.9349	62.852	62.9691	56.9245	37.8403	14.1382	28.6232
1899-12-31 15:45:27	0.499226	0.49843	4.87769	8.63351	20.3785	20.4198	27.2188	33.6088	50.354	57.3703	65.8739	62.9422	62.8602	62.9803	56.9339	37.8471	14.1419	28.6265
1899-12-31 15:45:28	0.49981	0.498107	4.87884	8.63519	20.3816	20.4214	27.2202	33.6112	50.354	57.3674	65.8718	62.938	62.8555	62.975	56.9254	37.8389	14.1408	28.6219
1899-12-31 15:45:29	0.500022	0.499468	4.87997	8.63683	20.3847	20.4248	27.2243	33.6144	50.359	57.374	65.8773	62.9412	62.8585	62.9764	56.927	37.8397	14.1423	28.6216
1899-12-31 15:45:30	0.500032	0.499004	4.8808	8.63807	20.3867	20.4273	27.2248	33.6137	50.3597	57.3661	65.8713	62.9324	62.8496	62.9659	56.9155	37.8291	14.1387	28.6135
1899-12-31 15:45:31	0.500227	0.499015	4.88239	8.64059	20.3923	20.4323	27.2342	33.6253	50.3731	57.3917	65.8914	62.9629	62.8786	62.9975	56.9431	37.8484	14.1479	28.6285
1899-12-31 15:45:32	0.500775	0.498719	4.88344	8.64202	20.3935	20.4337	27.2347	33.6253	50.3721	57.3841	65.8839	62.9518	62.8646	62.9844	56.927	37.8348	14.1425	28.6187
1899-12-31 15:45:33	0.501044	0.500428	4.88513	8.64372	20.3975	20.439	27.2413	33.631	50.3785	57.4011	65.8902	62.9566	62.8721	62.9924	56.9309	37.8355	14.1433	28.6183
1899-12-31 15:45:34	0.50098	0.500911	4.88581	8.64608	20.401	20.4417	27.2425	33.6349	50.386	57.3981	65.8943	62.9571	62.8723	62.9937	56.9305	37.8359	14.1437	28.6175
1899-12-31 15:45:35	0.501608	0.499377	4.88765	8.64841	20.4053	20.4466	27.2499	33.6441	50.3929	57.415	65.9127	62.9739	62.8935	63.0169	56.9495	37.8487	14.1489	28.6274
1899-12-31 15:45:36	0.501557	0.499561	4.88895	8.6507	20.4099	20.451	27.2567	33.6534	50.4069	57.4329	65.9326	62.9917	62.9096	63.0321	56.9645	37.8581	14.1517	28.6337
1899-12-31 15:45:37	0.502092	0.500578	4.89054	8.65267	20.4152	20.4564	27.2653	33.6636	50.423	57.4497	65.9534	63.0062	62.9301	63.0522	56.9822	37.8686	14.1574	28.6414
1899-12-31 15:45:38	0.502008	0.500129	4.89225	8.65453	20.4197	20.4604	27.2704	33.6698	50.4322	57.46	65.9639	63.0174	62.935	63.0614	56.986	37.8712	14.1577	28.6418
1899-12-31 15:45:39	0.50217	0.501541	4.89388	8.65777	20.4269	20.4669	27.2788	33.6816	50.4496	57.4802	65.987	63.0401	62.9589	63.0913	57.0086	37.8844	14.1641	28.6523
1899-12-31 15:45:40	0.502319	0.502342	4.89537	8.66039	20.4327	20.4733	27.288	33.6933	50.4668	57.5015	66.0136	63.071	62.9853	63.1183	57.0325	37.8985	14.1731	28.664
1899-12-31 15:45:41	0.502738	0.501742	4.8968	8.66279	20.4374	20.4773	27.2951	33.7018	50.4807	57.5121	66.0273	63.0816	62.9988	63.1311	57.0385	37.9012	14.1771	28.6644
1899-12-31 15:45:42	0.502963	0.501873	4.89864	8.66524	20.4445	20.485	27.3051	33.7139	50.4984	57.5301	66.0505	63.1067	63.0239	63.1511	57.059	37.9131	14.1829	28.6734
1899-12-31 15:45:43	0.503288	0.503096	4.89999	8.66814	20.4489	20.4882	27.309	33.7193	50.5067	57.542	66.0625	63.113	63.0299	63.1555	57.0617	37.9121	14.1854	28.672
1899-12-31 15:45:44	0.50355	0.50168	4.90108	8.66952	20.4513	20.4907	27.3136	33.7238	50.5145	57.5453	66.0657	63.1152	63.03	63.1585	57.0588	37.9074	14.1868	28.6676
1899-12-31 15:45:45	0.503895	0.502364	4.90196	8.67111	20.4551	20.494	27.3174	33.7265	50.5181	57.5433	66.0653	63.1134	63.0283	63.1538	57.0505	37.9006	14.186	28.6617
1899-12-31 15:45:46	0.504091	0.503268	4.90412	8.67412	20.4608	20.5004	27.3269	33.74	50.538	57.5672	66.0934	63.1438	63.0535	63.1793	57.0789	37.9162	14.1958	28.675
1899-12-31 15:45:47	0.50433	0.502674	4.90606	8.67717	20.4684	20.5092	27.3387	33.7569	50.5712	57.6016	66.1324	63.1791	63.0931	63.2166	57.1102	37.9379	14.2059	28.6927
1899-12-31 15:45:48	0.504213	0.502798	4.90794	8.68057	20.4755	20.5147	27.3498	33.7693	50.596	57.628	66.1552	63.2034	63.1196	63.2453	57.1319	37.9496	14.2105	28.7014
1899-12-31 15:45:49	0.504179	0.503216	4.9087	8.68252	20.4779	20.5184	27.3521	33.7733	50.6002	57.6342	66.1593	63.2117	63.1235	63.2475	57.1365	37.9539	14.2119	28.7047
1899-12-31 15:45:50	0.50466	0.503024	4.91018	8.68365	20.4808	20.5199	27.3544	33.7741	50.6015	57.6289	66.1579	63.2035	63.1142	63.2381	57.126	37.9447	14.2081	28.696
1899-12-31 15:45:51	0.505617	0.504051	4.91141	8.68566	20.4846	20.5248	27.3607	33.7802	50.6141	57.6377	66.1659	63.2085	63.1219	63.2468	57.1279	37.9437	14.2096	28.6957
1899-12-31 15:45:52	0.505653	0.503161	4.91312	8.68855	20.4915	20.5313	27.3714	33.7948	50.6371	57.6646	66.1952	63.244	63.1551	63.2787	57.1602	37.9667	14.2179	28.712
1899-12-31 15:45:53	0.505416	0.504838	4.91373	8.68903	20.4913	20.5313	27.3666	33.788	50.6217	57.6477	66.1689	63.2157	63.1241	63.2461	57.1251	37.9393	14.2105	28.6914
1899-12-31 15:45:54	0.505452	0.505028	4.91541	8.69121	20.4955	20.5343	27.3718	33.7948	50.6326	57.6619	66.181	63.2282	63.1358	63.2616	57.1344	37.945	14.2131	28.6963
1899-12-31 15:45:55	0.505674	0.504006	4.91659	8.69335	20.5003	20.5404	27.379	33.8045	50.6496	57.6748	66.2056	63.2466	63.1561	63.2841	57.1533	37.9577	14.2187	28.7054
1899-12-31 15:45:56	0.506099	0.505051	4.91841	8.69599	20.5062	20.5459	27.3887	33.8156	50.6655	57.6989	66.2275	63.2695	63.1797	63.3022	57.1754	37.9732	14.2237	28.7164
1899-12-31 15:45:57	0.506009	0.505103	4.91893	8.69696	20.5071	20.5475	27.3886	33.8149	50.6624	57.6948	66.2153	63.2572	63.164	63.2899	57.1584	37.9578	14.2211	28.7046
1899-12-31 15:45:58	0.506437	0.505802	4.92059	8.69965	20.5115	20.5501	27.3936	33.8214	50.6697	57.7024	66.2221	63.2639	63.174	63.2963	57.1604	37.9584	14.2224	28.7036
1899-12-31 15:45:58	0.506766	0.505186	4.9221	8.70205	20.5173	20.5577	27.4021	33.8319	50.6847	57.7165	66.2462	63.2819	63.1926	63.3178	57.178	37.9693	14.2292	28.7117
1899-12-31 15:45:59	0.506709	0.506616	4.92429	8.70564	20.5265	20.5666	27.4176	33.8524	50.712	57.7564	66.3008	63.3312	63.2391	63.3649	57.2241	38.0012	14.2428	28.7346
1899-12-31 15:47:15	0.5235	0.524262	5.03204	8.8747	20.8733	20.9105	27.8846	34.4303	51.5602	58.723	67.3659	64.3045	64.1998	64.3279	57.9617	38.3882	14.4685	29.0067
1899-12-31 15:47:16	0.524483	0.523466	5.0342	8.87818	20.8833	20.9238	27.9065	34.4569	51.6007	58.7649	67.4094	64.3641	64.2536	64.3809	58.0258	38.4341	14.4877	29.041
1899-12-31 15:47:17	0.524742	0.52415	5.03676	8.88178	20.8928	20.933	27.9206	34.4756	51.6269	58.7977	67.454	64.4085	64.2993	64.4285	58.0685	38.4632	14.4993	29.0631
1899-12-31 15:47:18	0.525037	0.524737	5.03667	8.8821	20.8914	20.9319	27.9144	34.4667	51.6096	58.7776	67.423	64.3743	64.2646	64.3933	58.0342	38.4363	14.4907	29.0423
1899-12-31 15:47:19	0.525177	0.525155	5.0379	8.88353	20.8927	20.9332	27.9155	34.468	51.615	58.7749	67.4238	64.3737	64.264	64.3914	58.0321	38.433	14.4912	29.0408
1899-12-31 15:47:20	0.525243	0.524657	5.03872	8.88419	20.8937	20.9339	27.9158	34.4672	51.6111	58.7744	67.413	64.3661	64.2571	64.3832	58.0223	38.4278	14.4892	29.0359
1899-12-31 15:47:21	0.525874	0.525443	5.03964	8.88529	20.8939	20.9343	27.9133	34.4623	51.6042	58.7614	67.3977	64.3474	64.2365	64.3679	58.0048	38.415	14.4849	29.0254
1899-12-31 15:47:22	0.526096	0.524946	5.04149	8.88899	20.9026	20.942	27.9291	34.482	51.6328	58.801	67.4523	64.4047	64.2946	64.4232	58.0609	38.4558	14.5014	29.0575
1899-12-31 15:47:23	0.526282	0.525545	5.0435	8.89126	20.9065	20.9474	27.9346	34.4908	51.646	58.8188	67.4744	64.4242	64.3135	64.4448	58.0783	38.4677	14.5083	29.0673
1899-12-31 15:47:24	0.526378	0.525218	5.04397	8.89228	20.9093	20.9496	27.9344	34.4906	51.644	58.8153	67.4677	64.4154	64.3064	64.442	58.0687	38.4608	14.5083	29.062
1899-12-31 15:47:25	0.526414	0.525462	5.04459	8.89279	20.909	20.9499	27.9344	34.4872	51.6386	58.8108	67.4529	64.4015	64.2888	64.4174	58.0521	38.4468	14.5049	29.051
1899-12-31 15:47:26	0.526782	0.525259	5.04586	8.89417	20.9103	20.9504	27.9351	34.4883	51.6359	58.8046	67.4426	64.3892	64.2743	64.4045	58.0337	38.4307	14.5009	29.0374
1899-12-31 15:47:27	0.526609	0.526167	5.04739	8.89752	20.9184	20.9594	27.9469	34.504	51.6596	58.8262	67.4821	64.4266	64.3153	64.4459	58.0687	38.4552	14.5106	29.056
1899-12-31 15:47:28	0.52729	0.527209	5.04866	8.89883	20.9204	20.9611	27.9491	34.5054	51.6598	58.8343	67.4777	64.4201	64.3074	64.432	58.0566	38.4427	14.507	29.0457
1899-12-31 15:47:29	0.527266	0.526121	5.05074	8.90247	20.9287	20.9696	27.9617	34.5225	51.686	58.8679	67.5213	64.459	64.3475	64.483	58.0953	38.4694	14.5188	29.067
1899-12-31 15:47:30	0.527778	0.525878	5.05282	8.90498	20.935	20.9771	27.9717	34.533	51.7039	58.8848	67.5382	64.48	64.3667	64.4975	58.1125	38.4801	14.5236	29.0746
1899-12-31 15:47:31	0.527827	0.527597	5.05372	8.90723	20.9393	20.98	27.9776	34.5418	51.7163	58.9009	67.5549	64.4973	64.3843	64.5125	58.1264	38.4869	14.5277	29.0801
1899-12-31 15:47:32	0.528106	0.527152	5.05562	8.91067	20.9465	20.9875	27.9872	34.5554	51.7389	58.9223	67.5788	64.5249	64.4092	64.5455	58.152	38.5036	14.5353	29.0917
1899-12-31 15:47:33	0.528415	0.527988	5.05657	8.91174	20.9484	20.9887	27.9887	34.5564	51.7419	58.9187	67.5722	64.5131	64.3987	64.5349	58.1371	38.4917	14.5315	29.0817
1899-12-31 15:47:34	0.528464	0.52783	5.05769	8.9132	20.9517	20.9917	27.9934	34.5605	51.7482	58.9257	67.5779	64.5215	64.4061	64.5424	58.1385	38.491	14.5329	29.0817
1899-12-31 15:47:35	0.528969	0.529064	5.05876	8.91551	20.9565	20.9968	27.9988	34.5684	51.7578	58.9414	67.5934	64.537	64.4188	64.5533	58.1524	38.4995	14.5384	29.0873
1899-12-31 15:47:36	0.529135	0.527416	5.06084	8.91761	20.961	21.0017	28.0057	34.5764	51.77	58.9524	67.6047	64.5477	64.4322	64.5663	58.1621	38.5026	14.5412	29.0896
1899-12-31 15:47:37	0.529463	0.528578	5.06219	8.92009	20.9669	21.0072	28.0129	34.5876	51.7917	58.9767	67.6281	64.5733	64.4529	64.5881	58.179	38.5124	14.547	29.0957
1899-12-31 15:47:38	0.529875	0.528263	5.06467	8.92527	20.9797	21.0203	28.0376	34.6176	51.8518	59.0493	67.7132	64.6565	64.5353	64.6648	58.2539	38.5643	14.5671	29.1333
1899-12-31 15:47:39	0.529436	0.528446	5.0658	8.9269	20.9797	21.0206	28.0367	34.615	51.8447	59.0318	67.6937	64.6372	64.5145	64.6439	58.2266	38.5414	14.5566	29.1155
1899-12-31 15:47:40	0.530067	0.529213	5.06773	8.92897	20.9863	21.0267	28.0453	34.6267	51.8645	59.0634	67.719	64.6576	64.5331	64.6653	58.2438	38.5525	14.5628	29.1224
1899-12-31 15:47:41	0.530538	0.52945	5.06928	8.93127	20.9914	21.0312	28.0522	34.6366	51.8821	59.0818	67.7397	64.6792	64.5549	64.686	58.2611	38.5633	14.5676	29.1299
1899-12-31 15:47:42	0.530521	0.530971	5.0708	8.93361	20.9956	21.0362	28.0592	34.6448	51.8998	59.1001	67.7579	64.6908	64.5682	64.702	58.2705	38.5676	14.5705	29.1325
1899-12-31 15:47:43	0.530185	0.529547	5.0718	8.93535	21.0003	21.0401	28.0629	34.6488	51.9023	59.1021	67.761	64.6951	64.5727	64.6994	58.2711	38.5656	14.5714	29.1304
1899-12-31 15:47:44	0.531125	0.530439	5.07333	8.93781	21.006	21.0458	28.07	34.6599	51.9189	59.1245	67.7824	64.717	64.5968	64.72	58.2924	38.5805	14.579	29.1424
1899-12-31 15:47:45	0.531161	0.530145	5.07405	8.93914	21.0064	21.0458	28.0686	34.6563	51.9153	59.1172	67.7731	64.7003	64.5816	64.705	58.2742	38.5655	14.5729	29.1292
1899-12-31 15:47:46	0.531244	0.53089	5.07512	8.94068	21.011	21.0496	28.0756	34.6625	51.9206	59.1302	67.7873	64.716	64.5948	64.7195	58.2859	38.5739	14.577	29.1359
1899-12-31 15:47:46	0.531955	0.530704	5.07627	8.94212	21.0109	21.0507	28.0742	34.6599	51.9161	59.116	67.7694	64.6998	64.5755	64.7067	58.2649	38.5555	14.569	29.1219
1899-12-31 15:47:47	0.532024	0.53149	5.07762	8.94396	21.0161	21.057	28.0822	34.6691	51.9324	59.136	67.7931	64.7155	64.5982	64.7242	58.2827	38.5665	14.5735	29.1299
1899-12-31 15:47:48	0.532267	0.530877	5.07904	8.94611	21.0183	21.0597	28.0858	34.6738	51.9373	59.1438	67.7947	64.7191	64.5994	64.728	58.2823	38.5644	14.5728	29.1273
1899-12-31 15:47:49	0.53223	0.531689	5.08052	8.94892	21.025	21.0652	28.0942	34.6854	51.9529	59.1569	67.82	64.743	64.6218	64.7526	58.3045	38.5779	14.5799	29.1367
1899-12-31 15:47:50	0.532196	0.532397	5.083	8.95223	21.0336	21.0734	28.1095	34.7043	51.9787	59.1913	67.8593	64.7789	64.6648	64.7948	58.3414	38.5989	14.5873	29.1539
1899-12-31 15:47:51	0.532508	0.531595	5.0849	8.956	21.0424	21.0824	28.1236	34.7225	52.0101	59.2249	67.8994	64.823	64.7087	64.8465	58.3804	38.623	14.5966	29.1725
1899-12-31 15:47:52	0.533013	0.532751	5.08608	8.95822	21.0478	21.0872	28.1304	34.7326	52.0247	59.239	67.9203	64.8376	64.7243	64.8609	58.3902	38.627	14.5995	29.1752
1899-12-31 15:47:53	0.533428	0.532859	5.08775	8.96022	21.0513	21.0925	28.1365	34.7385	52.0314	59.2464	67.9245	64.8418	64.7253	64.8599	58.3874	38.621	14.5974	29.1699
1899-12-31 15:47:54	0.533497	0.532623	5.089	8.96283	21.0562	21.0966	28.1451	34.7471	52.0479	59.2629	67.9425	64.8585	64.7382	64.873	58.3961	38.6242	14.5984	29.1709
1899-12-31 15:47:55	0.533586	0.531903	5.09118	8.96535	21.0616	21.1037	28.152	34.7571	52.0568	59.2794	67.9603	64.8767	64.7556	64.8935	58.4115	38.6337	14.6032	29.1781
1899-12-31 15:47:56	0.533616	0.532932	5.09193	8.96669	21.0649	21.1059	28.1534	34.7596	52.0681	59.2811	67.968	64.8782	64.7581	64.901	58.4112	38.6333	14.6028	29.1777
1899-12-31 15:47:57	0.534287	0.533091	5.09298	8.96824	21.0665	21.1082	28.1562	34.7629	52.0655	59.2813	67.9708	64.8813	64.7631	64.9048	58.4163	38.638	14.604	29.1818
1899-12-31 15:47:58	0.534359	0.533461	5.09422	8.97003	21.0709	21.1118	28.1619	34.7705	52.0774	59.2989	67.9918	64.9038	64.7809	64.925	58.4392	38.6549	14.6104	29.1955
1899-12-31 15:47:59	0.53403	0.533163	5.09495	8.97155	21.0704	21.1125	28.1603	34.7663	52.0738	59.2957	67.9786	64.8959	64.7775	64.9157	58.4365	38.6567	14.6103	29.1971
1899-12-31 15:49:15	0.548614	0.54935	5.17815	9.08903	21.2682	21.3121	28.3639	34.9984	52.3811	59.6123	68.3111	65.2179	65.1158	65.2445	58.742	38.8854	14.7844	29.382
1899-12-31 15:49:16	0.550043	0.548993	5.17857	9.09139	21.2706	21.3113	28.3684	34.9966	52.3893	59.6104	68.3161	65.2217	65.1152	65.2467	58.7395	38.884	14.7859	29.3816
1899-12-31 15:49:17	0.550201	0.54948	5.17999	9.09416	21.2747	21.3153	28.3729	35.0012	52.3961	59.621	68.3203	65.2258	65.1195	65.2499	58.743	38.8849	14.7874	29.3836
1899-12-31 15:49:18	0.550879	0.548704	5.18089	9.09535	21.2754	21.3169	28.3718	35.0009	52.39	59.6142	68.3167	65.2239	65.1155	65.246	58.7398	38.8837	14.7873	29.3821
1899-12-31 15:49:19	0.550855	0.549694	5.18106	9.09593	21.2758	21.3155	28.3699	34.9955	52.3864	59.6027	68.3012	65.2062	65.0986	65.2297	58.7215	38.8718	14.7842	29.372
1899-12-31 15:49:20	0.550874	0.549951	5.18203	9.09654	21.2765	21.3174	28.3683	34.9946	52.3825	59.6036	68.2967	65.2014	65.0965	65.2301	58.7197	38.8726	14.7844	29.3736
1899-12-31 15:49:20	0.551046	0.550714	5.18283	9.09834	21.279	21.3197	28.3727	34.9985	52.3903	59.6087	68.3056	65.2119	65.1038	65.236	58.7328	38.8836	14.7887	29.3826
1899-12-31 15:49:21	0.550992	0.549938	5.18403	9.09831	21.2775	21.3197	28.3696	34.9936	52.3802	59.5967	68.2859	65.1977	65.0892	65.2174	58.7164	38.8738	14.7867	29.3749
1899-12-31 15:49:22	0.55141	0.550041	5.18443	9.09985	21.279	21.3202	28.3694	34.9949	52.3815	59.599	68.2863	65.1958	65.0887	65.2201	58.7155	38.8729	14.7877	29.3749
1899-12-31 15:49:23	0.551632	0.550119	5.18573	9.10089	21.2812	21.3223	28.3705	34.9951	52.3781	59.5957	68.2833	65.1909	65.0861	65.2205	58.7122	38.8708	14.7872	29.3735
1899-12-31 15:49:24	0.551884	0.549485	5.18628	9.10212	21.2822	21.3231	28.3707	34.9934	52.3775	59.5875	68.2754	65.1873	65.0778	65.2107	58.7029	38.8651	14.7852	29.3689
1899-12-31 15:49:25	0.55183	0.5504	5.18823	9.10467	21.287	21.3285	28.3776	35.0035	52.3951	59.6076	68.3048	65.2149	65.1067	65.237	58.7347	38.8877	14.7938	29.3872
1899-12-31 15:49:26	0.552275	0.550807	5.18895	9.10591	21.2895	21.3314	28.3792	35.0069	52.3979	59.6144	68.3119	65.2205	65.1163	65.2464	58.7453	38.8968	14.8001	29.3957
1899-12-31 15:49:27	0.551952	0.551554	5.1897	9.10651	21.2891	21.3292	28.3763	35.0007	52.3865	59.6057	68.2925	65.1995	65.0942	65.2221	58.7237	38.8815	14.7947	29.3838
1899-12-31 15:49:28	0.552715	0.551766	5.19128	9.10881	21.2938	21.3346	28.3847	35.0111	52.4059	59.6201	68.3176	65.2276	65.1227	65.2527	58.7552	38.9047	14.8054	29.4024
1899-12-31 15:49:29	0.552665	0.552855	5.19195	9.10962	21.2951	21.3369	28.3856	35.013	52.4063	59.6171	68.3179	65.2289	65.1237	65.2559	58.7547	38.9051	14.8059	29.4031
1899-12-31 15:49:30	0.552571	0.552093	5.19305	9.11111	21.2993	21.3412	28.3901	35.0162	52.4122	59.6328	68.333	65.2414	65.1359	65.2647	58.7698	38.9164	14.8101	29.4128
1899-12-31 15:49:31	0.553109	0.551947	5.1937	9.11274	21.3	21.3424	28.391	35.017	52.4138	59.6267	68.3292	65.2375	65.1309	65.264	58.7657	38.9138	14.8088	29.411
1899-12-31 15:49:32	0.553125	0.552636	5.195	9.11429	21.3034	21.3453	28.3947	35.0203	52.421	59.6348	68.334	65.241	65.1392	65.269	58.7695	38.9174	14.8105	29.414
1899-12-31 15:49:33	0.55321	0.553242	5.19643	9.11638	21.3081	21.3509	28.4036	35.0307	52.4342	59.6524	68.3579	65.2673	65.1589	65.2855	58.7895	38.9297	14.8147	29.4228
1899-12-31 15:49:34	0.553798	0.552677	5.19748	9.11857	21.3121	21.3525	28.4074	35.0367	52.4443	59.664	68.3701	65.2804	65.1719	65.3006	58.8011	38.94	14.8169	29.4291
1899-12-31 15:49:35	0.554146	0.552727	5.1986	9.11937	21.3134	21.3564	28.4074	35.0361	52.4415	59.6585	68.3603	65.2726	65.1618	65.2932	58.7897	38.9291	14.813	29.4212
1899-12-31 15:49:36	0.554611	0.552379	5.19912	9.12003	21.3131	21.3541	28.4054	35.0323	52.4341	59.6479	68.3427	65.2498	65.1459	65.2742	58.7702	38.9157	14.808	29.4113
1899-12-31 15:49:37	0.553925	0.553239	5.20042	9.1227	21.3192	21.36	28.4147	35.0429	52.4528	59.6739	68.373	65.2815	65.1732	65.2982	58.8008	38.9373	14.8186	29.428
1899-12-31 15:49:38	0.554393	0.55448	5.20122	9.12361	21.3203	21.3624	28.4172	35.0447	52.4556	59.6757	68.3743	65.2801	65.1723	65.3016	58.7977	38.9349	14.8198	29.4261
1899-12-31 15:49:39	0.554838	0.55332	5.20222	9.12421	21.3208	21.3635	28.4148	35.0409	52.4496	59.6637	68.3548	65.2607	65.1559	65.2835	58.7773	38.9205	14.8159	29.4151
1899-12-31 15:49:40	0.554764	0.554005	5.20332	9.12626	21.3229	21.3643	28.4165	35.044	52.4566	59.6667	68.3659	65.2701	65.1648	65.2884	58.7873	38.9273	14.8207	29.4203
1899-12-31 15:49:41	0.555258	0.554436	5.20432	9.12786	21.327	21.3706	28.4236	35.0522	52.4656	59.6834	68.3832	65.2919	65.1842	65.3128	58.809	38.9447	14.8279	29.4341
1899-12-31 15:49:42	0.555058	0.55361	5.20509	9.12923	21.3302	21.371	28.4237	35.0531	52.4682	59.6843	68.3842	65.2929	65.1825	65.3073	58.8075	38.9439	14.8288	29.4335
1899-12-31 15:49:43	0.55543	0.555192	5.20637	9.131	21.3323	21.3747	28.4287	35.0592	52.4796	59.6922	68.3998	65.3096	65.2009	65.3261	58.8272	38.9607	14.8355	29.4473
1899-12-31 15:49:44	0.555605	0.554543	5.20694	9.13197	21.3337	21.3772	28.4292	35.0602	52.4782	59.6943	68.3972	65.3089	65.1995	65.3249	58.8283	38.9641	14.8375	29.4499
1899-12-31 15:49:45	0.555545	0.555799	5.20816	9.13285	21.3339	21.376	28.4276	35.056	52.472	59.6839	68.3842	65.2946	65.1859	65.3114	58.8132	38.9534	14.8355	29.4427
1899-12-31 15:49:46	0.556036	0.554914	5.20838	9.13365	21.3327	21.3753	28.4251	35.0513	52.4663	59.68	68.3735	65.2835	65.1747	65.3026	58.8037	38.947	14.8354	29.4392
1899-12-31 15:49:47	0.556075	0.554965	5.20938	9.13509	21.3364	21.3788	28.4288	35.058	52.4753	59.6892	68.3898	65.3026	65.197	65.3227	58.8299	38.9705	14.8463	29.4566
1899-12-31 15:49:48	0.556217	0.554954	5.21023	9.13604	21.3367	21.3791	28.4274	35.0547	52.4681	59.6825	68.3823	65.2937	65.1876	65.3143	58.8228	38.9664	14.8458	29.4545
1899-12-31 15:49:49	0.556785	0.556041	5.21156	9.13793	21.3415	21.3832	28.4334	35.0631	52.4842	59.6992	68.4028	65.3221	65.2141	65.3392	58.8511	38.9883	14.8555	29.4733
1899-12-31 15:49:50	0.556947	0.556226	5.21228	9.13893	21.3408	21.3835	28.433	35.0596	52.4784	59.69	68.3951	65.3067	65.2024	65.3303	58.8401	38.9816	14.8536	29.4674
1899-12-31 15:49:51	0.557471	0.555477	5.21343	9.14005	21.3434	21.3847	28.4325	35.0617	52.4788	59.6918	68.3947	65.309	65.2045	65.3336	58.8419	38.9841	14.8579	29.4707
1899-12-31 15:49:52	0.557168	0.555149	5.21491	9.14282	21.3483	21.3901	28.4428	35.0726	52.497	59.7091	68.4195	65.3376	65.2315	65.3587	58.8677	39.0025	14.867	29.4844
1899-12-31 15:49:53	0.557297	0.556533	5.21613	9.14448	21.3522	21.3954	28.4458	35.0762	52.504	59.7143	68.4263	65.3403	65.2335	65.3595	58.868	39.0003	14.8665	29.4829
1899-12-31 15:49:54	0.557369	0.556854	5.21748	9.14739	21.3572	21.4005	28.4542	35.0879	52.5217	59.7354	68.4497	65.364	65.2656	65.3883	58.8982	39.0205	14.874	29.4988
1899-12-31 15:49:55	0.557432	0.556761	5.21753	9.14737	21.3548	21.3978	28.4467	35.0772	52.5028	59.7104	68.4111	65.3252	65.2199	65.3427	58.8496	38.9846	14.8601	29.4703
1899-12-31 15:49:56	0.557644	0.556829	5.21925	9.14998	21.3611	21.4043	28.4563	35.088	52.5197	59.7319	68.4332	65.3522	65.2464	65.3705	58.8741	39.0004	14.8677	29.4828
1899-12-31 15:49:57	0.557975	0.557858	5.22028	9.15069	21.3613	21.4049	28.4533	35.0858	52.5145	59.7273	68.4249	65.3411	65.232	65.3594	58.8601	38.9925	14.8664	29.4747
1899-12-31 15:49:58	0.558649	0.557035	5.2216	9.15293	21.3632	21.4071	28.4563	35.089	52.5198	59.7275	68.4339	65.3457	65.239	65.364	58.8659	38.9977	14.8704	29.479
1899-12-31 15:49:59	0.558499	0.558038	5.22187	9.15315	21.3643	21.4069	28.4551	35.0857	52.5154	59.7208	68.4194	65.3336	65.2255	65.3541	58.854	38.9878	14.869	29.4719
1899-12-31 15:50:00	0.558389	0.558529	5.22295	9.15504	21.3675	21.4101	28.4576	35.0902	52.5226	59.7293	68.4318	65.3412	65.2337	65.3641	58.8619	38.9948	14.8734	29.4784
1899-12-31 15:51:15	0.576229	0.575649	5.32444	9.30915	21.6764	21.7126	28.8667	35.5898	53.2896	60.5991	69.379	66.2409	66.1267	66.2579	59.5883	39.4182	15.1023	29.789
1899-12-31 15:51:16	0.576489	0.575616	5.32577	9.31118	21.676	21.7199	28.8649	35.5905	53.2874	60.582	69.3621	66.2183	66.1039	66.2285	59.5649	39.4	15.0948	29.7707
1899-12-31 15:51:17	0.576542	0.576248	5.32758	9.31347	21.6814	21.7252	28.8715	35.5988	53.2989	60.5944	69.3746	66.23	66.1151	66.239	59.5714	39.4033	15.0974	29.7729
1899-12-31 15:51:18	0.576702	0.576831	5.3285	9.31569	21.6858	21.7284	28.8791	35.6068	53.3114	60.6091	69.3915	66.2473	66.1312	66.2597	59.585	39.4095	15.1008	29.778
1899-12-31 15:51:19	0.577014	0.577363	5.33006	9.31692	21.6872	21.7311	28.881	35.6076	53.3093	60.6095	69.3853	66.2379	66.1224	66.2489	59.5707	39.3984	15.0974	29.7671
1899-12-31 15:51:20	0.576921	0.577266	5.33116	9.31909	21.6925	21.7368	28.8862	35.6159	53.3237	60.6179	69.4022	66.254	66.136	66.2643	59.5842	39.4059	15.1019	29.7732
1899-12-31 15:51:21	0.577304	0.576272	5.33312	9.32254	21.6993	21.745	28.8976	35.629	53.3411	60.6443	69.4309	66.282	66.1662	66.2983	59.6123	39.4235	15.1096	29.7884
1899-12-31 15:51:22	0.577835	0.577143	5.33387	9.32466	21.7026	21.7452	28.9005	35.6343	53.3534	60.6533	69.44	66.2907	66.1732	66.3028	59.6158	39.4244	15.11	29.7874
1899-12-31 15:51:23	0.577945	0.577409	5.33502	9.32619	21.7061	21.7487	28.9055	35.6393	53.36	60.66	69.4493	66.2969	66.1787	66.3126	59.6158	39.4234	15.1119	29.7862
1899-12-31 15:51:24	0.577829	0.577397	5.3367	9.32884	21.7126	21.7567	28.9151	35.6526	53.3842	60.6853	69.4768	66.3237	66.2059	66.3441	59.6454	39.4435	15.1202	29.801
1899-12-31 15:51:25	0.577892	0.578067	5.33796	9.33052	21.7156	21.759	28.9199	35.6554	53.3851	60.6894	69.4835	66.3249	66.2072	66.3482	59.6446	39.4407	15.1204	29.7994
1899-12-31 15:51:26	0.578627	0.57793	5.33934	9.3321	21.7183	21.7618	28.9222	35.6582	53.3914	60.6906	69.486	66.327	66.2097	66.3461	59.6451	39.4417	15.1222	29.7993
1899-12-31 15:51:27	0.579009	0.578002	5.33986	9.33329	21.721	21.7632	28.9247	35.6614	53.3955	60.6973	69.4863	66.3275	66.2111	66.3469	59.644	39.4384	15.1237	29.7975
1899-12-31 15:51:28	0.579232	0.578634	5.34121	9.33498	21.7236	21.7663	28.9281	35.6653	53.3987	60.6979	69.4957	66.3357	66.2188	66.3553	59.6537	39.4467	15.1279	29.8038
1899-12-31 15:51:29	0.579113	0.578653	5.34206	9.33628	21.7258	21.7695	28.9316	35.6701	53.4075	60.7048	69.5054	66.3401	66.2268	66.3599	59.6612	39.452	15.1308	29.8083
1899-12-31 15:51:30	0.579518	0.57867	5.34304	9.33804	21.7283	21.7711	28.9324	35.6711	53.4096	60.7111	69.5036	66.3423	66.23	66.3626	59.6622	39.4537	15.1322	29.8099
1899-12-31 15:51:31	0.579817	0.579086	5.34407	9.33912	21.7281	21.7721	28.9313	35.6681	53.4015	60.7011	69.4924	66.3281	66.2152	66.3544	59.6487	39.4444	15.1297	29.8034
1899-12-31 15:51:32	0.579891	0.578964	5.34459	9.34071	21.7319	21.7746	28.9363	35.6738	53.4097	60.709	69.5101	66.3471	66.2316	66.3645	59.6691	39.4593	15.1369	29.8149
1899-12-31 15:51:33	0.579884	0.579703	5.34602	9.3425	21.7344	21.7793	28.938	35.6763	53.4135	60.7182	69.5173	66.3521	66.2395	66.3657	59.6732	39.4618	15.1393	29.8178
1899-12-31 15:51:34	0.580692	0.579409	5.3471	9.34524	21.7394	21.7833	28.9465	35.6872	53.4269	60.737	69.5419	66.3788	66.2705	66.4005	59.7048	39.4852	15.1507	29.8367
1899-12-31 15:51:35	0.580559	0.579322	5.34785	9.34523	21.7402	21.783	28.9459	35.6851	53.4237	60.7298	69.5364	66.3695	66.2622	66.3912	59.696	39.4793	15.1497	29.8322
1899-12-31 15:51:36	0.580699	0.579799	5.34867	9.34674	21.7423	21.7849	28.9481	35.6877	53.4284	60.734	69.5385	66.3695	66.2592	66.3892	59.6955	39.4778	15.1523	29.8317
1899-12-31 15:51:37	0.580795	0.5807	5.34983	9.34818	21.7437	21.7869	28.9488	35.6885	53.4311	60.7354	69.5327	66.3649	66.2542	66.3864	59.6884	39.4723	15.1531	29.827
1899-12-31 15:51:38	0.581158	0.580914	5.35103	9.35037	21.7474	21.7909	28.9533	35.6946	53.4435	60.7476	69.5481	66.3832	66.2702	66.4023	59.7062	39.4841	15.1617	29.8366
1899-12-31 15:51:39	0.581832	0.581433	5.35216	9.3515	21.7493	21.7926	28.9546	35.6966	53.4403	60.7449	69.5479	66.3831	66.2692	66.4039	59.7047	39.4842	15.1614	29.8364
1899-12-31 15:51:40	0.58155	0.579779	5.35296	9.35151	21.7496	21.7929	28.9529	35.6923	53.4352	60.7353	69.5381	66.3652	66.2519	66.3841	59.6869	39.4708	15.1554	29.8257
1899-12-31 15:51:41	0.581175	0.581771	5.35401	9.35342	21.7523	21.7966	28.9563	35.6982	53.442	60.7492	69.5462	66.3811	66.2662	66.3948	59.7006	39.4804	15.1608	29.8341
1899-12-31 15:51:42	0.582139	0.58073	5.35536	9.35601	21.7573	21.8008	28.9619	35.7064	53.4563	60.7623	69.57	66.4013	66.2879	66.4236	59.7189	39.4939	15.1662	29.8444
1899-12-31 15:51:43	0.582215	0.581291	5.35654	9.35754	21.7591	21.802	28.9644	35.7092	53.4607	60.7682	69.5681	66.4015	66.2862	66.4218	59.7205	39.4952	15.1701	29.8456
1899-12-31 15:51:44	0.581959	0.579998	5.35734	9.35898	21.7612	21.8059	28.9674	35.712	53.4644	60.7755	69.5753	66.4081	66.2931	66.4275	59.7251	39.499	15.1718	29.8483
1899-12-31 15:51:45	0.582651	0.580738	5.35804	9.35987	21.7625	21.8059	28.9662	35.7103	53.4628	60.7661	69.5673	66.3989	66.2827	66.4139	59.7141	39.4897	15.1685	29.8416
1899-12-31 15:51:46	0.58309	0.581107	5.35909	9.36137	21.7653	21.809	28.9674	35.7146	53.4676	60.768	69.5716	66.4033	66.2871	66.4173	59.7165	39.4925	15.1718	29.8428
1899-12-31 15:51:47	0.582757	0.5822	5.36035	9.36339	21.7688	21.8136	28.9747	35.7223	53.4816	60.7888	69.5897	66.4261	66.308	66.4417	59.7398	39.5097	15.1808	29.8574
1899-12-31 15:51:48	0.583173	0.582493	5.3615	9.36447	21.7719	21.8156	28.9767	35.7248	53.4845	60.7917	69.5934	66.4311	66.3133	66.4485	59.747	39.5153	15.1847	29.8625
1899-12-31 15:51:49	0.58326	0.582267	5.36248	9.36594	21.7737	21.8169	28.9785	35.7265	53.4889	60.7938	69.5958	66.4336	66.3147	66.4491	59.75	39.5182	15.1873	29.865
1899-12-31 15:51:50	0.583243	0.582654	5.36298	9.36734	21.7751	21.8173	28.9779	35.726	53.4883	60.7928	69.5946	66.4311	66.3133	66.4477	59.7509	39.5204	15.1887	29.8667
1899-12-31 15:51:51	0.583669	0.581575	5.36337	9.36775	21.7757	21.8193	28.9751	35.7226	53.4818	60.7899	69.5866	66.4211	66.3026	66.4359	59.7415	39.5146	15.1877	29.8634
1899-12-31 15:51:52	0.583612	0.583043	5.36417	9.36858	21.7752	21.819	28.974	35.7208	53.479	60.784	69.5824	66.415	66.2971	66.4335	59.739	39.5161	15.1881	29.8652
1899-12-31 15:51:53	0.584054	0.58335	5.36555	9.37027	21.7788	21.8222	28.9796	35.728	53.4909	60.7972	69.6016	66.4424	66.3257	66.4578	59.7692	39.5401	15.1988	29.8845
1899-12-31 15:51:54	0.583991	0.582676	5.36542	9.37001	21.775	21.8192	28.9702	35.7162	53.4702	60.7739	69.5674	66.4037	66.2924	66.4217	59.7361	39.5176	15.1909	29.8684
1899-12-31 15:51:55	0.58438	0.582916	5.3659	9.37052	21.7748	21.8185	28.9682	35.7135	53.4659	60.7643	69.5619	66.402	66.2865	66.4228	59.7379	39.5231	15.1932	29.8735
1899-12-31 15:51:56	0.584181	0.582735	5.36682	9.37093	21.775	21.8201	28.9668	35.7119	53.4638	60.7635	69.5599	66.4037	66.2844	66.417	59.7395	39.5276	15.1963	29.8771
1899-12-31 15:51:57	0.584676	0.58347	5.36692	9.37171	21.7751	21.8187	28.9641	35.7073	53.4539	60.7526	69.5456	66.3878	66.2715	66.4079	59.7274	39.5186	15.195	29.8717
1899-12-31 15:51:57	0.584424	0.583382	5.36787	9.37212	21.7731	21.8177	28.961	35.7014	53.4494	60.7432	69.5311	66.3714	66.2525	66.3924	59.7122	39.5109	15.1931	29.8659
1899-12-31 15:51:58	0.584916	0.584119	5.36882	9.3737	21.7777	21.8206	28.9648	35.7077	53.4561	60.7551	69.5516	66.3943	66.2777	66.4108	59.7412	39.535	15.2044	29.8857
1899-12-31 15:51:59	0.58479	0.584125	5.36879	9.37383	21.7742	21.8178	28.9561	35.6963	53.4385	60.732	69.5167	66.361	66.2429	66.376	59.708	39.512	15.1978	29.8698
1899-12-31 15:53:15	0.601318	0.59524	5.43145	9.45375	21.8654	21.9068	28.9892	35.6966	53.3926	60.6432	69.3581	66.2488	66.1514	66.2688	59.6964	39.6251	15.3162	29.9889
1899-12-31 15:53:16	0.599352	0.597766	5.43265	9.45577	21.8674	21.9088	28.9867	35.6974	53.3972	60.6318	69.3628	66.2514	66.1473	66.2891	59.702	39.6285	15.3233	29.9959
1899-12-31 15:53:17	0.599246	0.598395	5.43394	9.4575	21.8699	21.9137	28.9899	35.6996	53.4044	60.6333	69.3661	66.2608	66.1625	66.3048	59.723	39.6494	15.3316	30.014
1899-12-31 15:53:18	0.599908	0.598385	5.43405	9.45723	21.8677	21.9088	28.9828	35.6898	53.3869	60.6131	69.3475	66.238	66.1387	66.2784	59.7027	39.6382	15.3286	30.0066
1899-12-31 15:53:19	0.599723	0.599267	5.43442	9.45827	21.8688	21.9102	28.9849	35.6909	53.3869	60.6173	69.35	66.2438	66.146	66.2847	59.7134	39.6501	15.334	30.0163
1899-12-31 15:53:20	0.59971	0.599129	5.43546	9.45944	21.8697	21.9114	28.9842	35.6881	53.382	60.6087	69.3422	66.2362	66.1364	66.2761	59.7069	39.6477	15.3343	30.0151
1899-12-31 15:53:21	0.599611	0.599147	5.43625	9.46005	21.8693	21.9131	28.9826	35.6864	53.3753	60.602	69.3367	66.2315	66.1329	66.2715	59.705	39.6478	15.3359	30.016
1899-12-31 15:53:22	0.600609	0.599827	5.43611	9.46018	21.8664	21.9095	28.9745	35.6755	53.3568	60.5793	69.3057	66.195	66.1006	66.2397	59.6754	39.6299	15.3297	30.0023
1899-12-31 15:53:23	0.60057	0.599235	5.43618	9.46044	21.8661	21.9085	28.973	35.6717	53.3509	60.5689	69.2938	66.1837	66.0909	66.2242	59.6706	39.6297	15.3307	30.0025
1899-12-31 15:53:24	0.600584	0.600183	5.43787	9.46158	21.8683	21.9106	28.9747	35.6749	53.3545	60.5736	69.2999	66.196	66.1001	66.2367	59.6835	39.6399	15.3358	30.013
1899-12-31 15:53:25	0.600488	0.60021	5.43856	9.46245	21.8692	21.9123	28.975	35.6743	53.3552	60.5761	69.2994	66.1899	66.0995	66.2359	59.6827	39.6417	15.3357	30.014
1899-12-31 15:53:26	0.600948	0.599819	5.43993	9.46362	21.8703	21.9149	28.9773	35.6741	53.3508	60.574	69.2963	66.1895	66.0996	66.2342	59.6826	39.6435	15.3375	30.0162
1899-12-31 15:53:27	0.60163	0.599489	5.43947	9.46381	21.8694	21.9114	28.9732	35.6682	53.3392	60.559	69.2758	66.1715	66.0761	66.2162	59.6632	39.6313	15.3329	30.0071
1899-12-31 15:53:28	0.601322	0.599946	5.44021	9.46427	21.8678	21.9105	28.9698	35.6621	53.3306	60.5435	69.2606	66.1506	66.0612	66.194	59.6469	39.6221	15.3299	29.9987
1899-12-31 15:53:28	0.601469	0.600151	5.4407	9.46553	21.8692	21.9105	28.9681	35.6613	53.3262	60.5405	69.2544	66.1465	66.055	66.1936	59.6429	39.6198	15.331	29.9985
1899-12-31 15:53:29	0.601576	0.600627	5.44116	9.46567	21.8687	21.9114	28.9659	35.6564	53.3218	60.5349	69.2417	66.1346	66.0421	66.176	59.632	39.6126	15.3287	29.9927
1899-12-31 15:53:30	0.601679	0.59999	5.44221	9.46721	21.872	21.9144	28.9697	35.6619	53.3277	60.5364	69.2505	66.1443	66.0521	66.1887	59.6425	39.6213	15.3343	30.0004
1899-12-31 15:53:31	0.601886	0.600829	5.4431	9.46836	21.8728	21.9166	28.9705	35.6625	53.326	60.5354	69.2493	66.1413	66.0505	66.1859	59.64	39.6183	15.3336	29.9982
1899-12-31 15:53:32	0.602033	0.602121	5.44527	9.4711	21.8796	21.9231	28.9815	35.6766	53.3505	60.5656	69.2827	66.1782	66.0918	66.2247	59.6802	39.6471	15.3436	30.0204
1899-12-31 15:53:33	0.60239	0.601654	5.44604	9.47314	21.8838	21.9264	28.9879	35.685	53.3636	60.5772	69.301	66.1969	66.1105	66.2491	59.6974	39.659	15.3486	30.0299
1899-12-31 15:53:34	0.602184	0.603218	5.44806	9.47599	21.8883	21.9324	28.9969	35.695	53.3804	60.5994	69.3276	66.2314	66.1424	66.2792	59.7272	39.6811	15.3576	30.0472
1899-12-31 15:53:35	0.602448	0.602743	5.44873	9.47618	21.8888	21.9322	28.9956	35.6912	53.3737	60.5925	69.3136	66.211	66.1262	66.2641	59.7085	39.6664	15.3506	30.0361
1899-12-31 15:53:36	0.603013	0.60159	5.45018	9.4785	21.8957	21.9384	29.0039	35.7048	53.3944	60.6116	69.3451	66.2475	66.1594	66.3016	59.7428	39.6914	15.3616	30.0551
1899-12-31 15:53:37	0.603347	0.602624	5.45109	9.47918	21.8952	21.9382	29.0026	35.7011	53.3861	60.6008	69.3327	66.231	66.1435	66.2813	59.7267	39.6801	15.3563	30.0472
1899-12-31 15:53:38	0.603032	0.601865	5.45085	9.47966	21.8932	21.9366	28.998	35.6928	53.3727	60.5852	69.3071	66.2019	66.1142	66.2488	59.6992	39.6609	15.3489	30.031
1899-12-31 15:53:39	0.603571	0.601843	5.45255	9.48218	21.8986	21.9435	29.0056	35.7041	53.3926	60.6058	69.3345	66.2321	66.1462	66.2794	59.7265	39.6815	15.3592	30.0463
1899-12-31 15:53:40	0.603827	0.602875	5.45432	9.48444	21.9043	21.9485	29.0134	35.715	53.4078	60.6255	69.3599	66.2587	66.1735	66.3135	59.7534	39.6987	15.3696	30.0605
1899-12-31 15:53:41	0.603855	0.602701	5.45416	9.48443	21.9029	21.9448	29.0091	35.7067	53.3962	60.6079	69.3347	66.23	66.1423	66.2828	59.7232	39.6765	15.3624	30.044
1899-12-31 15:53:42	0.604111	0.603015	5.45538	9.4863	21.9064	21.9487	29.0141	35.7124	53.4032	60.6175	69.3458	66.2437	66.156	66.2906	59.7336	39.6835	15.3669	30.0498
1899-12-31 15:53:43	0.604671	0.603836	5.45688	9.48769	21.9095	21.952	29.0172	35.7158	53.4072	60.6209	69.35	66.2467	66.1608	66.3005	59.7383	39.6856	15.3704	30.0511
1899-12-31 15:53:44	0.604602	0.60379	5.45827	9.49007	21.9139	21.9568	29.0251	35.7267	53.4224	60.638	69.369	66.2715	66.1843	66.3259	59.7625	39.7024	15.3814	30.0635
1899-12-31 15:53:45	0.604855	0.604961	5.45924	9.49149	21.9169	21.9593	29.0269	35.7268	53.4252	60.6372	69.363	66.2631	66.1729	66.3145	59.7455	39.6879	15.3778	30.0518
1899-12-31 15:53:46	0.605205	0.603719	5.46021	9.49359	21.9203	21.9629	29.0313	35.7324	53.43	60.6456	69.3702	66.2687	66.1785	66.3183	59.7481	39.6873	15.3808	30.0509
1899-12-31 15:53:47	0.605242	0.603765	5.46145	9.49542	21.9219	21.9661	29.0334	35.7348	53.4311	60.6468	69.3722	66.2655	66.175	66.3119	59.7399	39.6797	15.3814	30.0446
1899-12-31 15:53:48	0.605735	0.604943	5.46315	9.49874	21.93	21.9725	29.0461	35.7513	53.4557	60.6763	69.4047	66.2962	66.2071	66.3503	59.7692	39.6969	15.391	30.0567
1899-12-31 15:53:49	0.605566	0.604823	5.4651	9.50104	21.937	21.9792	29.0555	35.7651	53.4739	60.6959	69.4307	66.3235	66.2313	66.3752	59.7904	39.7061	15.3975	30.0636
1899-12-31 15:53:50	0.606032	0.60592	5.46705	9.50454	21.9448	21.9858	29.069	35.7817	53.5016	60.7295	69.4697	66.3591	66.2682	66.4098	59.8213	39.7251	15.4063	30.0774
1899-12-31 15:53:51	0.606697	0.604539	5.46859	9.50797	21.9518	21.9942	29.0814	35.7968	53.5296	60.7562	69.5049	66.3864	66.3024	66.4446	59.8502	39.7437	15.4142	30.0903
1899-12-31 15:53:52	0.606957	0.605608	5.47024	9.51074	21.958	21.9996	29.0911	35.8086	53.5458	60.7795	69.5327	66.4096	66.3262	66.4694	59.8687	39.7544	15.4185	30.0981
1899-12-31 15:53:53	0.606902	0.606165	5.47171	9.51215	21.9607	22.0045	29.0943	35.8139	53.556	60.7892	69.5405	66.416	66.3336	66.4744	59.8706	39.7526	15.4183	30.097
1899-12-31 15:53:54	0.607092	0.606784	5.47323	9.51511	21.9688	22.01	29.1068	35.8306	53.5797	60.817	69.5795	66.4591	66.3704	66.5121	59.9081	39.7786	15.4274	30.1165
1899-12-31 15:53:55	0.60701	0.606499	5.47453	9.51691	21.9734	22.0148	29.1124	35.8388	53.5918	60.8276	69.5949	66.4752	66.3855	66.5311	59.9194	39.7836	15.4303	30.1198
1899-12-31 15:53:56	0.607619	0.605964	5.47605	9.51871	21.9773	22.0199	29.1181	35.8433	53.598	60.8403	69.6024	66.4769	66.3884	66.5302	59.918	39.7797	15.429	30.1168
1899-12-31 15:53:57	0.607842	0.607222	5.47762	9.52146	21.9813	22.0242	29.1251	35.8535	53.6168	60.8587	69.6214	66.4953	66.4055	66.5516	59.9318	39.7868	15.4333	30.1208
1899-12-31 15:53:58	0.608188	0.606993	5.47947	9.52371	21.9863	22.0288	29.1336	35.8625	53.6217	60.8708	69.6368	66.5091	66.4186	66.5662	59.9421	39.7925	15.4363	30.1241
1899-12-31 15:53:59	0.608605	0.607289	5.48099	9.52603	21.992	22.0349	29.1398	35.8727	53.6368	60.8871	69.6559	66.5301	66.4374	66.5798	59.9569	39.8012	15.4404	30.1297
1899-12-31 15:55:15	0.624888	0.626186	5.57453	9.66423	22.2584	22.2978	29.4892	36.299	54.2469	61.5783	70.4007	67.2295	67.1282	67.2615	60.5107	40.1146	15.6421	30.3538
1899-12-31 15:55:16	0.625701	0.624958	5.57528	9.66641	22.2635	22.3052	29.4986	36.3078	54.2595	61.5903	70.4215	67.2565	67.1559	67.2945	60.5326	40.1323	15.6507	30.3691
1899-12-31 15:55:17	0.626305	0.62507	5.57728	9.67009	22.2711	22.3132	29.5095	36.3234	54.2859	61.617	70.4631	67.2985	67.202	67.3428	60.5791	40.1674	15.6656	30.3963
1899-12-31 15:55:18	0.625927	0.625596	5.57763	9.67001	22.2675	22.309	29.501	36.3116	54.2626	61.5957	70.4298	67.2633	67.1653	67.3054	60.5476	40.1468	15.6557	30.3809
1899-12-31 15:55:19	0.626504	0.625989	5.57808	9.671	22.2702	22.3115	29.504	36.3173	54.2691	61.607	70.4443	67.2825	67.1846	67.3217	60.5689	40.1652	15.6633	30.397
1899-12-31 15:55:20	0.626353	0.626191	5.57843	9.67066	22.2658	22.3079	29.4976	36.3038	54.2495	61.5855	70.4128	67.2541	67.1542	67.2929	60.5433	40.1508	15.6576	30.3868
1899-12-31 15:55:21	0.626874	0.625269	5.57847	9.67099	22.2666	22.3082	29.4952	36.3023	54.2489	61.5828	70.4088	67.2517	67.1554	67.2935	60.548	40.1566	15.6608	30.3926
1899-12-31 15:55:22	0.62662	0.625631	5.57816	9.67032	22.2621	22.3042	29.4853	36.2881	54.2243	61.5549	70.3699	67.2108	67.1137	67.2581	60.5118	40.1326	15.6518	30.3751
1899-12-31 15:55:23	0.626745	0.625654	5.57826	9.66991	22.2579	22.3003	29.4745	36.2746	54.2009	61.5235	70.3421	67.1759	67.0796	67.2206	60.4825	40.1161	15.6458	30.3644
1899-12-31 15:55:24	0.627199	0.625514	5.57951	9.67117	22.262	22.3026	29.4811	36.2812	54.2129	61.5383	70.3613	67.2013	67.108	67.2503	60.5128	40.1426	15.655	30.3849
1899-12-31 15:55:25	0.626732	0.626095	5.57958	9.67063	22.2581	22.3007	29.472	36.2691	54.189	61.511	70.3307	67.1691	67.0765	67.2172	60.4867	40.1273	15.6496	30.3746
1899-12-31 15:55:25	0.627535	0.625797	5.58051	9.67195	22.258	22.3011	29.4715	36.2673	54.1853	61.509	70.3305	67.1706	67.0802	67.2152	60.4942	40.1363	15.6543	30.3829
1899-12-31 15:55:26	0.627457	0.626717	5.58	9.67102	22.2534	22.2953	29.4595	36.2524	54.1601	61.4691	70.296	67.1315	67.0408	67.1759	60.4591	40.1173	15.6478	30.3682
1899-12-31 15:55:27	0.627442	0.627378	5.581	9.67225	22.2547	22.297	29.4621	36.2546	54.1655	61.4733	70.301	67.1413	67.0531	67.187	60.4788	40.1334	15.6559	30.3835
1899-12-31 15:55:28	0.62773	0.626489	5.58092	9.67203	22.2517	22.2938	29.455	36.245	54.1503	61.4518	70.2764	67.1179	67.0317	67.1658	60.4586	40.1237	15.653	30.3766
1899-12-31 15:55:29	0.627599	0.626724	5.58124	9.67184	22.2512	22.2932	29.452	36.2406	54.1444	61.4392	70.271	67.1132	67.0266	67.1614	60.4615	40.1304	15.6557	30.3827
1899-12-31 15:55:30	0.627501	0.625834	5.58187	9.67244	22.25	22.2938	29.4506	36.2368	54.1337	61.4322	70.2621	67.1051	67.0172	67.1508	60.4526	40.1278	15.6548	30.382
1899-12-31 15:55:31	0.627828	0.628176	5.58196	9.67267	22.2499	22.2923	29.4473	36.2343	54.1332	61.4231	70.2548	67.0996	67.0135	67.1501	60.4521	40.1287	15.6554	30.3847
1899-12-31 15:55:32	0.628266	0.627622	5.58284	9.67425	22.2528	22.2947	29.4501	36.2379	54.1356	61.4294	70.2603	67.1048	67.0179	67.1572	60.4568	40.1322	15.6575	30.3866
1899-12-31 15:55:33	0.628467	0.627516	5.58434	9.67642	22.2564	22.2982	29.4548	36.2426	54.1435	61.4388	70.2732	67.116	67.0307	67.1668	60.4696	40.1406	15.6621	30.3934
1899-12-31 15:55:34	0.628795	0.628607	5.58575	9.67788	22.26	22.3016	29.4614	36.2528	54.1589	61.4647	70.2918	67.1337	67.0485	67.1876	60.4875	40.1539	15.6669	30.4024
1899-12-31 15:55:35	0.629325	0.628032	5.5878	9.68166	22.2681	22.3113	29.4753	36.2697	54.1812	61.5011	70.3292	67.1773	67.09	67.231	60.5238	40.1773	15.6786	30.4215
1899-12-31 15:55:36	0.629031	0.627683	5.58785	9.68055	22.2645	22.307	29.4657	36.2559	54.1611	61.4564	70.2861	67.1249	67.0396	67.1784	60.4665	40.134	15.662	30.3875
1899-12-31 15:55:37	0.629256	0.628628	5.58976	9.68275	22.2694	22.3112	29.4721	36.2636	54.1721	61.4799	70.3008	67.1377	67.0496	67.1879	60.4741	40.1373	15.6631	30.3897
1899-12-31 15:55:38	0.62979	0.628323	5.59078	9.68563	22.2765	22.3179	29.483	36.2791	54.1956	61.5117	70.3303	67.1733	67.085	67.2266	60.5099	40.1629	15.6757	30.4082
1899-12-31 15:55:39	0.629978	0.628166	5.59214	9.68795	22.2808	22.3212	29.4889	36.2856	54.2093	61.5211	70.3422	67.1892	67.0975	67.2362	60.5201	40.1682	15.679	30.4133
1899-12-31 15:55:40	0.630176	0.629718	5.59389	9.69022	22.2854	22.3274	29.4981	36.2969	54.2269	61.5459	70.3672	67.2203	67.1247	67.2666	60.5468	40.187	15.6887	30.4278
1899-12-31 15:55:41	0.629955	0.629272	5.59459	9.69032	22.2854	22.3277	29.4954	36.2928	54.2164	61.5357	70.3547	67.2	67.1085	67.2492	60.5269	40.1719	15.6833	30.415
1899-12-31 15:55:42	0.630462	0.629578	5.59565	9.69202	22.2889	22.3318	29.5001	36.2993	54.2264	61.5413	70.36	67.211	67.1193	67.2629	60.5375	40.1789	15.6864	30.4211
1899-12-31 15:55:43	0.630577	0.630923	5.59629	9.69344	22.2905	22.3328	29.5021	36.2996	54.2278	61.5429	70.3654	67.2129	67.12	67.2633	60.537	40.1807	15.6886	30.4218
1899-12-31 15:55:44	0.630712	0.629692	5.59833	9.69589	22.2964	22.3379	29.5105	36.3109	54.2442	61.5627	70.3869	67.2402	67.1514	67.2934	60.5673	40.2011	15.6971	30.4381
1899-12-31 15:55:45	0.63075	0.631491	5.59956	9.69774	22.2996	22.3426	29.516	36.3167	54.2528	61.5758	70.3983	67.252	67.1596	67.3033	60.575	40.2056	15.6998	30.4418
1899-12-31 15:55:46	0.631457	0.631034	5.60023	9.69946	22.302	22.345	29.5186	36.3208	54.2575	61.5787	70.4025	67.2506	67.1584	67.3025	60.5701	40.199	15.7004	30.4372
1899-12-31 15:55:47	0.631947	0.631289	5.60101	9.70065	22.3028	22.3473	29.519	36.3194	54.2563	61.5798	70.3991	67.2458	67.1548	67.2916	60.5659	40.197	15.7011	30.4352
1899-12-31 15:55:48	0.631873	0.63044	5.60271	9.70201	22.3064	22.3483	29.5233	36.3241	54.2609	61.5816	70.4019	67.2517	67.1593	67.2999	60.5668	40.196	15.703	30.4342
1899-12-31 15:55:49	0.63232	0.631083	5.60374	9.70513	22.3136	22.3561	29.5357	36.34	54.2867	61.6087	70.4404	67.2872	67.1989	67.341	60.6058	40.2231	15.7164	30.4557
1899-12-31 15:55:50	0.632339	0.631429	5.60552	9.70739	22.3181	22.3606	29.5408	36.3478	54.2997	61.6208	70.4526	67.2969	67.2077	67.3515	60.6102	40.2238	15.7181	30.455
1899-12-31 15:55:51	0.632417	0.631042	5.60632	9.70783	22.3184	22.3604	29.5397	36.3439	54.2893	61.6058	70.4351	67.2809	67.1881	67.3299	60.5876	40.2048	15.7101	30.4397
1899-12-31 15:55:52	0.632788	0.63213	5.60856	9.71137	22.3264	22.3701	29.5525	36.3629	54.3167	61.6388	70.4834	67.319	67.2294	67.3714	60.6279	40.2319	15.7239	30.4603
1899-12-31 15:55:53	0.633312	0.63264	5.61019	9.71386	22.3317	22.3755	29.5624	36.375	54.3337	61.665	70.51	67.3503	67.2565	67.4021	60.6527	40.2472	15.7315	30.4723
1899-12-31 15:55:54	0.63344	0.63264	5.61086	9.71585	22.3352	22.3781	29.5624	36.3776	54.3389	61.6661	70.5147	67.3486	67.2572	67.3995	60.6501	40.2432	15.731	30.4695
1899-12-31 15:55:55	0.633399	0.632607	5.61199	9.71662	22.336	22.3805	29.5656	36.379	54.3392	61.6653	70.5111	67.346	67.254	67.4003	60.6449	40.2379	15.7305	30.4646
1899-12-31 15:55:56	0.633301	0.632197	5.61317	9.71834	22.3397	22.383	29.5702	36.3856	54.3468	61.6754	70.5223	67.3612	67.2653	67.408	60.6564	40.2474	15.7361	30.4714
1899-12-31 15:55:57	0.63426	0.633704	5.61402	9.71955	22.3401	22.382	29.5706	36.384	54.343	61.6691	70.5159	67.352	67.2561	67.4006	60.6455	40.2388	15.7334	30.4654
1899-12-31 15:55:58	0.634229	0.633369	5.61449	9.71997	22.3405	22.3847	29.5666	36.3802	54.3398	61.658	70.4972	67.3324	67.2388	67.3837	60.6258	40.2254	15.728	30.4536
1899-12-31 15:55:59	0.634264	0.634144	5.61597	9.72118	22.343	22.3862	29.5708	36.3841	54.3444	61.6642	70.5028	67.3408	67.2478	67.3897	60.6329	40.2289	15.7303	30.4565
1899-12-31 15:56:00	0.634731	0.632943	5.61667	9.72311	22.3462	22.3885	29.5735	36.3888	54.3501	61.6739	70.5138	67.3496	67.2536	67.4005	60.6404	40.2342	15.7349	30.461
1899-12-31 15:57:15	0.649945	0.645466	5.68074	9.808	22.4536	22.4943	29.644	36.4466	54.4083	61.7131	70.551	67.4088	67.3329	67.4766	60.7822	40.4114	15.8931	30.6261
1899-12-31 15:57:16	0.649619	0.648478	5.68121	9.80927	22.4583	22.4991	29.6501	36.4539	54.4251	61.7129	70.5576	67.4179	67.3399	67.4967	60.7897	40.4168	15.895	30.6319
1899-12-31 15:57:17	0.649629	0.648013	5.68285	9.8109	22.4595	22.5033	29.6514	36.4557	54.4251	61.7141	70.5518	67.4135	67.3335	67.4879	60.7815	40.4107	15.8942	30.6253
1899-12-31 15:57:18	0.650207	0.64932	5.684	9.8123	22.4623	22.505	29.6531	36.4581	54.4317	61.7169	70.5554	67.4166	67.3373	67.4931	60.7829	40.4115	15.8943	30.6255
1899-12-31 15:57:19	0.649994	0.648934	5.68505	9.81452	22.4661	22.5091	29.6579	36.4639	54.4365	61.7301	70.5672	67.4252	67.3468	67.5026	60.7913	40.4147	15.8952	30.6285
1899-12-31 15:57:20	0.650342	0.650132	5.68659	9.81589	22.4685	22.5117	29.6617	36.4656	54.4449	61.7368	70.5704	67.4296	67.3478	67.505	60.7921	40.4146	15.8957	30.629
1899-12-31 15:57:21	0.650615	0.64981	5.68754	9.81735	22.4713	22.5138	29.6656	36.4705	54.4519	61.7326	70.5773	67.4364	67.3576	67.5124	60.7965	40.4163	15.8971	30.6298
1899-12-31 15:57:22	0.6508	0.650145	5.68852	9.81894	22.4748	22.5165	29.6694	36.4763	54.4617	61.7486	70.601	67.4543	67.3737	67.5336	60.8151	40.4295	15.905	30.6413
1899-12-31 15:57:23	0.651092	0.649618	5.68942	9.81973	22.4753	22.5184	29.6684	36.4754	54.4591	61.7479	70.5871	67.4429	67.3641	67.5181	60.8031	40.422	15.9028	30.6338
1899-12-31 15:57:24	0.651195	0.650776	5.69047	9.82181	22.4797	22.5222	29.675	36.484	54.4712	61.7607	70.6072	67.4674	67.3883	67.5402	60.829	40.4409	15.9123	30.6505
1899-12-31 15:57:25	0.651065	0.649652	5.6911	9.82268	22.4805	22.5233	29.6747	36.4835	54.4706	61.7587	70.607	67.4632	67.3837	67.5401	60.8229	40.4361	15.9107	30.647
1899-12-31 15:57:26	0.651686	0.650367	5.69195	9.82322	22.4808	22.5227	29.6754	36.481	54.4679	61.7507	70.5963	67.453	67.3746	67.5324	60.8123	40.4304	15.9092	30.641
1899-12-31 15:57:27	0.651633	0.651484	5.69237	9.82427	22.481	22.5226	29.6733	36.4792	54.4615	61.7458	70.5873	67.443	67.3647	67.5198	60.8041	40.4234	15.9083	30.6372
1899-12-31 15:57:28	0.651971	0.651263	5.69373	9.8256	22.4816	22.5259	29.674	36.479	54.4616	61.7457	70.5821	67.4394	67.3602	67.5215	60.7978	40.4174	15.9058	30.6324
1899-12-31 15:57:29	0.65222	0.650391	5.69481	9.82718	22.4872	22.5291	29.6812	36.4858	54.4725	61.7592	70.5995	67.4567	67.3761	67.5318	60.8149	40.4297	15.9099	30.6419
1899-12-31 15:57:30	0.652712	0.651465	5.69614	9.83019	22.4914	22.5347	29.6893	36.4973	54.4904	61.7796	70.6296	67.4871	67.4095	67.5646	60.8467	40.4532	15.9186	30.6611
1899-12-31 15:57:31	0.652532	0.650877	5.69852	9.83286	22.4989	22.5418	29.7001	36.5114	54.5133	61.8091	70.6663	67.5188	67.4468	67.6003	60.8849	40.4793	15.9297	30.6814
1899-12-31 15:57:32	0.652847	0.652582	5.69817	9.83323	22.4981	22.5407	29.6976	36.5063	54.5089	61.7954	70.647	67.5017	67.427	67.5793	60.8587	40.4613	15.9225	30.6668
1899-12-31 15:57:33	0.653036	0.652083	5.69947	9.83508	22.5008	22.5423	29.7009	36.5104	54.5083	61.8017	70.6544	67.5056	67.4317	67.582	60.8619	40.4617	15.923	30.6668
1899-12-31 15:57:34	0.653508	0.653007	5.70027	9.83657	22.5027	22.5469	29.7042	36.5129	54.5165	61.8015	70.6501	67.5014	67.427	67.5786	60.8517	40.4517	15.9184	30.6575
1899-12-31 15:57:35	0.653567	0.652766	5.70143	9.83845	22.5065	22.5499	29.7092	36.5206	54.5267	61.8158	70.6645	67.5128	67.4361	67.5937	60.8612	40.4568	15.9227	30.662
1899-12-31 15:57:36	0.653634	0.652435	5.70329	9.84056	22.5126	22.556	29.7181	36.5315	54.5414	61.8345	70.6875	67.5357	67.4626	67.6133	60.8816	40.4701	15.9283	30.6719
1899-12-31 15:57:37	0.654099	0.653385	5.70497	9.84338	22.5183	22.5617	29.7263	36.5405	54.5578	61.8502	70.7043	67.5557	67.4818	67.6351	60.8996	40.4794	15.933	30.6784
1899-12-31 15:57:38	0.654327	0.653759	5.7059	9.84483	22.5206	22.5637	29.7297	36.5457	54.5662	61.8591	70.7109	67.5621	67.4863	67.6341	60.8984	40.4756	15.934	30.6749
1899-12-31 15:57:39	0.654497	0.653527	5.70652	9.84684	22.5246	22.5667	29.733	36.5523	54.574	61.8673	70.7184	67.5688	67.4944	67.646	60.904	40.4776	15.9373	30.6757
1899-12-31 15:57:40	0.655234	0.653395	5.70898	9.84998	22.5313	22.5746	29.7444	36.5669	54.6043	61.8968	70.7538	67.6137	67.5351	67.6864	60.94	40.5036	15.9485	30.6947
1899-12-31 15:57:41	0.65531	0.653717	5.71021	9.85126	22.5343	22.5779	29.7494	36.57	54.6061	61.8997	70.7579	67.6152	67.5382	67.6895	60.9418	40.5028	15.949	30.6942
1899-12-31 15:57:42	0.655207	0.654655	5.71104	9.85297	22.5376	22.5807	29.7542	36.5756	54.6167	61.9108	70.7687	67.628	67.5495	67.702	60.9532	40.5097	15.9528	30.6993
1899-12-31 15:57:43	0.655279	0.654759	5.71237	9.85457	22.5395	22.5824	29.7544	36.5766	54.6182	61.9099	70.7677	67.6243	67.5447	67.6957	60.9467	40.5043	15.9528	30.6943
1899-12-31 15:57:43	0.655744	0.655188	5.71327	9.85631	22.5431	22.5867	29.7601	36.5841	54.6306	61.9248	70.781	67.6388	67.5591	67.7126	60.9577	40.511	15.9568	30.699
1899-12-31 15:57:44	0.65603	0.654842	5.71506	9.85806	22.5478	22.591	29.7659	36.5913	54.6429	61.9307	70.795	67.6534	67.5738	67.7255	60.9694	40.5175	15.9616	30.7034
1899-12-31 15:57:45	0.656089	0.65546	5.71566	9.85985	22.5496	22.5924	29.7675	36.5921	54.6459	61.9317	70.7887	67.6476	67.5643	67.7174	60.9579	40.5058	15.9578	30.6952
1899-12-31 15:57:46	0.656568	0.656031	5.71724	9.86214	22.5559	22.5979	29.7776	36.6051	54.6673	61.9541	70.824	67.6742	67.5959	67.7452	60.9873	40.5251	15.9677	30.71
1899-12-31 15:57:47	0.656444	0.654779	5.71882	9.86506	22.5621	22.6045	29.7849	36.6158	54.6901	61.9769	70.8513	67.7004	67.6243	67.7727	61.0125	40.5435	15.977	30.7234
1899-12-31 15:57:48	0.657115	0.656107	5.72035	9.86634	22.5649	22.6069	29.79	36.6205	54.6942	61.9805	70.8556	67.7048	67.6276	67.776	61.0141	40.5414	15.9775	30.7216
1899-12-31 15:57:49	0.657132	0.655944	5.72163	9.86914	22.5707	22.6135	29.7995	36.6329	54.7121	62.0013	70.8857	67.7337	67.6562	67.8069	61.0395	40.5587	15.9867	30.7355
1899-12-31 15:57:50	0.657387	0.655728	5.72274	9.87026	22.5728	22.6149	29.8025	36.6354	54.7175	62.003	70.885	67.7329	67.655	67.8041	61.0376	40.5554	15.9871	30.7314
1899-12-31 15:57:51	0.657822	0.656686	5.72313	9.87083	22.5719	22.6155	29.7989	36.6306	54.7079	61.9945	70.868	67.711	67.637	67.7807	61.0118	40.5358	15.9794	30.7155
1899-12-31 15:57:52	0.658184	0.65729	5.72477	9.8731	22.5777	22.6199	29.8053	36.6394	54.7207	62.0107	70.8864	67.731	67.6528	67.8026	61.0306	40.5458	15.9848	30.7239
1899-12-31 15:57:53	0.658217	0.656961	5.72612	9.87542	22.5829	22.6249	29.8145	36.6492	54.7342	62.027	70.9103	67.7513	67.6725	67.828	61.0475	40.5562	15.9904	30.7312
1899-12-31 15:57:54	0.658064	0.657481	5.72811	9.87734	22.5867	22.6295	29.8187	36.6563	54.7431	62.0361	70.9223	67.7606	67.6823	67.8391	61.0569	40.5627	15.9929	30.7362
1899-12-31 15:57:55	0.658356	0.657881	5.72918	9.87988	22.5913	22.6344	29.8263	36.6663	54.7577	62.0573	70.9469	67.7818	67.7049	67.8684	61.0789	40.5777	16.001	30.7483
1899-12-31 15:57:56	0.658568	0.658329	5.73077	9.88315	22.5982	22.6406	29.8372	36.6801	54.7811	62.0858	70.9805	67.8196	67.7429	67.904	61.1156	40.6046	16.0124	30.7695
1899-12-31 15:57:57	0.658677	0.65841	5.73152	9.88321	22.5977	22.642	29.8355	36.6768	54.7757	62.0734	70.9632	67.8002	67.7239	67.8857	61.0958	40.5878	16.0074	30.7575
1899-12-31 15:57:58	0.659408	0.657944	5.73209	9.88416	22.5987	22.6421	29.8335	36.6748	54.7714	62.0705	70.9586	67.7946	67.7153	67.8789	61.09	40.5841	16.0079	30.7551
1899-12-31 15:57:59	0.658976	0.658513	5.73267	9.88506	22.5983	22.6413	29.831	36.671	54.7628	62.062	70.9481	67.7836	67.7055	67.862	61.0758	40.5769	16.0063	30.7484
1899-12-31 16:01:34	0.711501	0.710216	6.00302	10.284	23.3571	23.403	30.8245	37.8909	56.5992	64.1115	73.2138	69.9279	69.8193	69.9886	62.7968	41.5811	16.6086	31.4813
1899-12-31 16:01:35	0.71154	0.711534	6.00279	10.2838	23.3565	23.4008	30.8233	37.8872	56.5925	64.0972	73.2051	69.9201	69.8127	69.9854	62.7921	41.5806	16.6089	31.4816
1899-12-31 16:01:36	0.712141	0.711386	6.00372	10.2841	23.3541	23.3994	30.8165	37.8777	56.5763	64.0819	73.1785	69.8982	69.7907	69.9666	62.7735	41.5714	16.6061	31.4752
1899-12-31 16:01:37	0.711998	0.710472	6.00354	10.2833	23.352	23.3963	30.8118	37.8672	56.5628	64.0564	73.153	69.8738	69.7649	69.9414	62.7519	41.5597	16.6004	31.4661
1899-12-31 16:01:38	0.712409	0.711478	6.00525	10.2855	23.3555	23.4007	30.816	37.8775	56.5772	64.0747	73.1825	69.9026	69.7967	69.9698	62.7865	41.5873	16.6142	31.4889
1899-12-31 16:01:39	0.712422	0.710668	6.00519	10.2856	23.3554	23.3987	30.8128	37.8717	56.5668	64.0642	73.1689	69.8894	69.7854	69.9608	62.7796	41.5862	16.6144	31.4888
1899-12-31 16:01:40	0.712588	0.711722	6.00511	10.2855	23.3513	23.3959	30.807	37.8626	56.5543	64.0436	73.1431	69.8716	69.7637	69.9437	62.7633	41.5797	16.6115	31.4845
1899-12-31 16:01:41	0.71301	0.711197	6.00453	10.2843	23.3472	23.3907	30.7956	37.8464	56.5291	64.005	73.1042	69.8279	69.7259	69.9029	62.7277	41.5553	16.6026	31.4669
1899-12-31 16:01:42	0.71279	0.711834	6.00528	10.2843	23.3456	23.3891	30.7914	37.8394	56.5179	63.9928	73.0857	69.8107	69.7108	69.8861	62.7141	41.5491	16.6018	31.4629
1899-12-31 16:01:43	0.712557	0.71207	6.00588	10.2851	23.3439	23.3885	30.7882	37.8363	56.5098	63.9847	73.0775	69.8079	69.7064	69.8808	62.716	41.556	16.6071	31.4694
1899-12-31 16:01:44	0.712802	0.711413	6.00663	10.2855	23.3455	23.3901	30.788	37.8349	56.5113	63.9805	73.0774	69.8068	69.7091	69.889	62.7219	41.5628	16.6108	31.4756
1899-12-31 16:01:45	0.71348	0.711599	6.00821	10.2877	23.3496	23.3939	30.7946	37.8448	56.5282	63.9971	73.1082	69.8417	69.7417	69.918	62.7581	41.5921	16.6256	31.5002
1899-12-31 16:01:46	0.713772	0.713223	6.00796	10.2872	23.3467	23.3894	30.7856	37.8327	56.5006	63.9751	73.0721	69.8036	69.7066	69.8823	62.7221	41.5678	16.6161	31.4813
1899-12-31 16:01:47	0.714147	0.712692	6.00879	10.2879	23.3473	23.3917	30.7864	37.8323	56.5049	63.9723	73.0714	69.8009	69.703	69.8799	62.7234	41.5698	16.6156	31.4838
1899-12-31 16:01:48	0.714276	0.713182	6.00989	10.2901	23.3512	23.3961	30.7949	37.8404	56.5191	63.987	73.0897	69.823	69.7262	69.9023	62.7458	41.5872	16.624	31.4974
1899-12-31 16:01:49	0.714216	0.712351	6.01109	10.2917	23.353	23.397	30.7941	37.841	56.5177	63.9874	73.0903	69.824	69.727	69.903	62.7461	41.5873	16.6248	31.4976
1899-12-31 16:01:50	0.714498	0.713648	6.01174	10.2927	23.3551	23.3984	30.7957	37.8404	56.5152	63.9881	73.0816	69.8141	69.7195	69.8967	62.7374	41.5819	16.6239	31.4937
1899-12-31 16:01:51	0.714388	0.71347	6.01101	10.2902	23.3459	23.3899	30.7783	37.8165	56.4764	63.9243	73.0173	69.7413	69.6456	69.8236	62.6616	41.5285	16.603	31.4523
1899-12-31 16:01:52	0.714816	0.713707	6.01284	10.2939	23.3542	23.3992	30.7935	37.8367	56.5071	63.9688	73.0666	69.7959	69.7022	69.8788	62.7197	41.5703	16.6232	31.4849
1899-12-31 16:01:53	0.715491	0.713423	6.01488	10.2972	23.3618	23.404	30.8017	37.8497	56.5272	63.9998	73.0952	69.8303	69.7325	69.9124	62.7504	41.592	16.6321	31.5023
1899-12-31 16:01:54	0.715553	0.713024	6.0157	10.2985	23.3637	23.407	30.8064	37.8537	56.536	64.0018	73.1027	69.8371	69.7381	69.9138	62.7556	41.5951	16.6358	31.5044
1899-12-31 16:01:55	0.715978	0.714475	6.01633	10.2995	23.3641	23.4085	30.805	37.8511	56.5295	63.9998	73.0938	69.8252	69.7315	69.9071	62.7453	41.5883	16.635	31.4995
1899-12-31 16:01:56	0.715808	0.713708	6.01738	10.3007	23.3673	23.4147	30.8102	37.857	56.5417	64.0124	73.1095	69.8386	69.7449	69.922	62.758	41.597	16.642	31.506
1899-12-31 16:01:57	0.715785	0.715343	6.01841	10.3024	23.3697	23.4148	30.8131	37.8598	56.5466	64.0092	73.107	69.8409	69.7438	69.9204	62.7567	41.5974	16.6439	31.5056
1899-12-31 16:01:57	0.716276	0.714943	6.01991	10.305	23.3753	23.4195	30.8207	37.8686	56.5608	64.0328	73.1304	69.8667	69.7679	69.9441	62.7804	41.6138	16.6518	31.518
1899-12-31 16:01:58	0.716392	0.716316	6.02104	10.3066	23.3777	23.4238	30.8242	37.873	56.5634	64.0388	73.1353	69.8707	69.7694	69.9474	62.7818	41.6122	16.6509	31.5167
1899-12-31 16:01:59	0.716973	0.715151	6.02235	10.3078	23.3782	23.4222	30.8224	37.8729	56.5626	64.0321	73.1282	69.8602	69.7598	69.94	62.7717	41.6037	16.6486	31.5112
1899-12-31 16:03:16	0.73848	0.734439	6.13867	10.4853	23.7471	23.7966	31.3582	38.5458	57.589	65.2068	74.4463	71.0907	70.9481	71.1494	63.6877	42.0633	16.8734	31.8171
1899-12-31 16:03:16	0.738297	0.737159	6.13958	10.4871	23.7581	23.803	31.3709	38.5677	57.6309	65.252	74.5111	71.1498	71.0207	71.22	63.7609	42.1178	16.8953	31.861
1899-12-31 16:03:17	0.738768	0.737512	6.14006	10.4883	23.7575	23.804	31.368	38.5626	57.6213	65.2407	74.4953	71.1326	70.9991	71.2017	63.7364	42.1001	16.887	31.8477
1899-12-31 16:03:18	0.73878	0.737786	6.14144	10.4902	23.7597	23.8051	31.3704	38.5683	57.629	65.2541	74.5069	71.1452	71.0133	71.2095	63.7546	42.1161	16.8918	31.8598
1899-12-31 16:03:19	0.738803	0.73906	6.1426	10.4915	23.7636	23.8099	31.3764	38.5743	57.6406	65.2642	74.5226	71.1641	71.0376	71.229	63.7803	42.1363	16.9008	31.8762
1899-12-31 16:03:20	0.739148	0.737733	6.14262	10.4921	23.7632	23.8086	31.3736	38.5694	57.6324	65.2507	74.5096	71.1515	71.0216	71.2146	63.7643	42.1264	16.8975	31.8682
1899-12-31 16:03:21	0.739263	0.73874	6.14275	10.4914	23.759	23.8054	31.3646	38.5578	57.6128	65.2285	74.4807	71.1181	70.9873	71.1876	63.7344	42.1058	16.8895	31.8544
1899-12-31 16:03:22	0.739346	0.738321	6.14295	10.4918	23.7576	23.8035	31.3601	38.5513	57.6036	65.2175	74.4685	71.1014	70.9729	71.1648	63.721	42.0992	16.8865	31.8489
1899-12-31 16:03:23	0.739807	0.738964	6.14378	10.4928	23.7566	23.803	31.3599	38.5497	57.5988	65.215	74.4604	71.1024	70.9695	71.1684	63.7196	42.0993	16.8893	31.85
1899-12-31 16:03:24	0.73974	0.738756	6.14421	10.4927	23.7558	23.8017	31.3538	38.5433	57.5896	65.1998	74.45	71.0887	70.9565	71.1488	63.7108	42.0958	16.8891	31.8483
1899-12-31 16:03:25	0.740407	0.739368	6.14514	10.4938	23.7574	23.804	31.3551	38.544	57.5897	65.2006	74.451	71.0918	70.9598	71.1507	63.7159	42.1014	16.8947	31.8537
1899-12-31 16:03:26	0.740317	0.73974	6.1466	10.4964	23.7632	23.8107	31.3672	38.5585	57.6159	65.2268	74.4876	71.1326	71.0049	71.2051	63.7637	42.1415	16.9116	31.883
1899-12-31 16:03:27	0.740795	0.739062	6.14655	10.4963	23.7596	23.8065	31.3592	38.5489	57.5944	65.2071	74.4629	71.1054	70.9753	71.1712	63.7356	42.1204	16.9048	31.8692
1899-12-31 16:03:28	0.740864	0.738974	6.14821	10.4974	23.7633	23.8094	31.3626	38.5525	57.6036	65.2144	74.4692	71.113	70.9821	71.1851	63.7464	42.1288	16.9081	31.8748
1899-12-31 16:03:29	0.740946	0.738596	6.14816	10.4979	23.7621	23.8075	31.3593	38.546	57.5943	65.2045	74.4562	71.1	70.9706	71.1661	63.7318	42.119	16.9055	31.8676
1899-12-31 16:03:30	0.740809	0.741105	6.14967	10.5002	23.7672	23.8131	31.3661	38.5559	57.6113	65.2261	74.4773	71.1238	70.9967	71.1982	63.7598	42.1406	16.9161	31.8845
1899-12-31 16:03:31	0.741416	0.740359	6.15033	10.5012	23.7666	23.8127	31.3651	38.5528	57.6064	65.2137	74.4684	71.1112	70.9823	71.1821	63.7449	42.1293	16.9111	31.8758
1899-12-31 16:03:32	0.741542	0.74088	6.15189	10.5021	23.7702	23.8163	31.369	38.5595	57.615	65.2285	74.4781	71.1256	70.9993	71.1974	63.7606	42.1408	16.9155	31.8855
1899-12-31 16:03:33	0.741727	0.739964	6.15327	10.5053	23.7762	23.8209	31.3766	38.5691	57.6323	65.2445	74.504	71.1473	71.0248	71.2248	63.7849	42.1581	16.9226	31.8977
[truncated: 4,780 more rows]
