# Supplementary material for: Measurements of spectral irradiance during the solar eclipse of 21 August 2017: reassessment of the effect of solar limb darkening and of changes in total ozone
Source: Copernicus journal article supplement (doi:10.5194/acp-2018-1048), 2018-11-02
Supplement: Supplementary file 1 [file acp-2018-1048-supplement.zip › Fig11a_Model.csv]

Time (UT)	306 (1)	306 (2)	315	320	340 (1)	340 (2)	380	395	412	443	490	532	555 (1)	555 (2)	665	875	940	1020
14:35:14.593	0.047638619	0.047638619	1.342562868	2.939556733	9.211187082	9.211187082	12.11926723	15.19030583	22.89969469	26.48350264	30.01845564	27.98604126	27.90676203	27.90676203	26.53307088	19.14657127	4.656378932	14.10549217
14:35:15.580	0.047672975	0.047672975	1.343215974	2.940734035	9.213838499	9.213838499	12.12276946	15.19471731	22.90637186	26.49123356	30.0271776	27.9943249	27.91507398	27.91507398	26.54029593	19.15119168	4.658263096	14.10884448
14:35:16.552	0.047706817	0.047706817	1.34385922	2.941893529	9.216449736	9.216449736	12.12621862	15.19906194	22.91294781	26.49884725	30.03576723	28.00248285	27.92325979	27.92325979	26.54741126	19.15574189	4.66011872	14.11214586
14:35:17.530	0.047740877	0.047740877	1.344506501	2.943060263	9.219077202	9.219077202	12.12968921	15.20343355	22.91956459	26.50650816	30.04441009	28.01069131	27.93149629	27.93149629	26.5545706	19.16032021	4.661985889	14.11546762
14:35:18.510	0.047775016	0.047775016	1.345155176	2.944229475	9.221710177	9.221710177	12.13316708	15.20781431	22.9261952	26.51418505	30.05307091	28.01891682	27.93974987	27.93974987	26.56174471	19.16490794	4.663856985	14.11879621
14:35:19.489	0.04780913	0.04780913	1.345803259	2.945397587	9.224340595	9.224340595	12.13664157	15.2121908	22.93281933	26.52185439	30.06172316	28.02713416	27.94799524	27.94799524	26.56891163	19.16949103	4.665726277	14.12212142
14:35:20.460	0.047842975	0.047842975	1.346446116	2.946556244	9.226949648	9.226949648	12.14008784	15.21653173	22.93938961	26.52946135	30.07030497	28.03528458	27.95617346	27.95617346	26.57602011	19.17403671	4.667580398	14.1254195
14:35:21.440	0.047877142	0.047877142	1.347095	2.947725727	9.229583003	9.229583003	12.1435662	15.22091309	22.94602105	26.53713908	30.07896655	28.04351074	27.96442765	27.96442765	26.58319456	19.17862454	4.669451802	14.12874815
14:35:22.415	0.047911145	0.047911145	1.347740643	2.948889337	9.232203054	9.232203054	12.14702699	15.22527229	22.95261894	26.54477792	30.08758421	28.05169515	27.97263994	27.97263994	26.59033253	19.18318901	4.671313764	14.13205984
14:35:23.398	0.047945437	0.047945437	1.348391653	2.950062581	9.234844719	9.234844719	12.15051633	15.22966744	22.95927122	26.55247969	30.09627279	28.0599469	27.98091979	27.98091979	26.59752915	19.18779094	4.673191099	14.13539871
14:35:24.363	0.04797911	0.04797911	1.349030816	2.951214441	9.237438158	9.237438158	12.15394197	15.23398234	22.965802	26.56004077	30.10480258	28.06804783	27.98904828	27.98904828	26.60459415	19.19230867	4.675034175	14.13867648
14:35:25.344	0.048013352	0.048013352	1.349680652	2.952385497	9.240074737	9.240074737	12.15742458	15.238369	22.97244138	26.56772752	30.11347409	28.07628331	27.99731177	27.99731177	26.61177643	19.19690136	4.676907922	14.14200862
14:35:26.325	0.048047603	0.048047603	1.350330556	2.95355664	9.242711431	9.242711431	12.16090735	15.24275583	22.979081	26.57541451	30.12214581	28.08451897	28.00557543	28.00557543	26.61895877	19.20149404	4.678781764	14.14534077
14:35:27.295	0.048081481	0.048081481	1.350973251	2.954714754	9.24531871	9.24531871	12.16435126	15.24709372	22.98564651	26.58301565	30.13072061	28.09266257	28.01374669	28.01374669	26.62606074	19.2060353	4.680634714	14.14863559
14:35:28.276	0.048115753	0.048115753	1.351623305	2.955886093	9.247955682	9.247955682	12.16783439	15.25148098	22.99228674	26.59070326	30.13939288	28.10089871	28.0220108	28.0220108	26.63324334	19.21062807	4.682508781	14.15196779
14:35:29.245	0.048149616	0.048149616	1.352265486	2.957043207	9.250560546	9.250560546	12.17127511	15.25581482	22.99884607	26.59829716	30.14795939	28.10903438	28.03017408	28.03017408	26.64033824	19.21516472	4.684360042	14.15525926
14:35:30.219	0.048183664	0.048183664	1.352911059	2.958206395	9.253179002	9.253179002	12.17473378	15.26017125	23.00543958	26.6059306	30.15657042	28.1172123	28.03837974	28.03837974	26.6474699	19.21972484	4.686220976	14.15856775
14:35:31.201	0.048218002	0.048218002	1.353562007	2.959379229	9.255819087	9.255819087	12.17822102	15.26456365	23.0120875	26.61362698	30.1652524	28.12545758	28.04665297	28.04665297	26.65466022	19.22432242	4.688097296	14.16190342
14:35:32.177	0.048252141	0.048252141	1.354209058	2.960545004	9.258443196	9.258443196	12.18168715	15.26892946	23.01869515	26.62127669	30.17388166	28.13365276	28.05487592	28.05487592	26.66180676	19.22889197	4.689962277	14.16521875
14:35:33.143	0.048285941	0.048285941	1.35484956	2.96169894	9.261040572	9.261040572	12.18511797	15.27325078	23.02523544	26.62884838	30.18242282	28.14176426	28.06301489	28.06301489	26.66888024	19.23341477	4.691808271	14.16850015
14:35:34.126	0.048320347	0.048320347	1.355501411	2.962873285	9.263683798	9.263683798	12.18860935	15.27764836	23.03189113	26.63655361	30.19111458	28.15001875	28.07129731	28.07129731	26.67607833	19.23801719	4.693686866	14.17183931
14:35:35.103	0.048354553	0.048354553	1.356149361	2.964040559	9.266311022	9.266311022	12.19207959	15.2820193	23.03850647	26.6442121	30.19975352	28.15822305	28.07952936	28.07952936	26.68323256	19.24259154	4.695554102	14.1751581
14:35:36.093	0.048389226	0.048389226	1.356806022	2.965223488	9.268973392	9.268973392	12.19559626	15.2864487	23.04521026	26.65197293	30.20850784	28.1665369	28.08787131	28.08787131	26.69048223	19.24722686	4.697446332	14.17852112
14:35:37.055	0.048422929	0.048422929	1.357444186	2.966373054	9.271560583	9.271560583	12.19901362	15.290753	23.05172471	26.65951451	30.21701478	28.17461578	28.09597749	28.09597749	26.69752692	19.25173108	4.699285145	14.18178902
14:35:38.047	0.048457694	0.048457694	1.358102339	2.967558587	9.274228632	9.274228632	12.20253778	15.29519182	23.0584427	26.66729168	30.22578738	28.18294694	28.10433678	28.10433678	26.70479151	19.25637585	4.701181442	14.18515888
14:35:39.012	0.048491524	0.048491524	1.35874266	2.968711959	9.276824211	9.276824211	12.20596621	15.29951005	23.06497816	26.6748575	30.23432152	28.1910516	28.11246878	28.11246878	26.7118585	19.26089424	4.703026245	14.18843705
14:35:39.993	0.048525927	0.048525927	1.359393684	2.969884568	9.27946299	9.27946299	12.20945171	15.30390013	23.07162235	26.68254914	30.2429975	28.19929093	28.12073591	28.12073591	26.71904283	19.26548761	4.704901768	14.19176961
14:35:40.963	0.048559955	0.048559955	1.360037488	2.971044131	9.282072323	9.282072323	12.21289831	15.30824121	23.07819234	26.69015484	30.25157646	28.20743811	28.12891055	28.12891055	26.72614671	19.2700295	4.706756377	14.19506482
14:35:41.951	0.048594627	0.048594627	1.36069333	2.972225333	9.284730253	9.284730253	12.21640909	15.31266312	23.08488464	26.69790207	30.260315	28.21573681	28.13723719	28.13723719	26.73338262	19.27465575	4.708645542	14.19842122
14:35:42.914	0.048628432	0.048628432	1.361332659	2.973376752	9.287321073	9.287321073	12.21983123	15.31697337	23.09140792	26.70545359	30.26883271	28.22382576	28.14535337	28.14535337	26.74043554	19.27916497	4.710487023	14.20169271
14:35:43.905	0.048663232	0.048663232	1.361990668	2.974561769	9.289987399	9.289987399	12.22335311	15.32140922	23.09812125	26.71322508	30.27759845	28.23215022	28.15370584	28.15370584	26.74769373	19.28380537	4.712382187	14.20505937
14:35:44.879	0.048697448	0.048697448	1.36263748	2.97572658	9.292608164	9.292608164	12.2268148	15.32576925	23.10471982	26.72086365	30.28621421	28.24033222	28.16191535	28.16191535	26.75482759	19.28836625	4.714244983	14.20836833
14:35:45.844	0.048731359	0.048731359	1.363278401	2.97688074	9.29520487	9.29520487	12.23024471	15.33008923	23.11125775	26.72843199	30.29475066	28.24843888	28.17004925	28.17004925	26.76189568	19.29288503	4.716090693	14.21164674
14:35:46.835	0.048766196	0.048766196	1.363936681	2.978066113	9.297871704	9.297871704	12.23376724	15.33452587	23.1179722	26.73620462	30.30351745	28.25676425	28.17840257	28.17840257	26.76915436	19.29752561	4.717986266	14.2150135
14:35:47.805	0.048800306	0.048800306	1.364581098	2.979226479	9.300482182	9.300482182	12.23721534	15.33886874	23.1245447	26.74381287	30.31209877	28.26491347	28.18657913	28.18657913	26.77625936	19.30206788	4.719841798	14.21830895
14:35:48.782	0.048834676	0.048834676	1.365230262	2.980395349	9.303111693	9.303111693	12.24068858	15.34324324	23.13116507	26.75147648	30.32074245	28.27312186	28.19481506	28.19481506	26.78341586	19.30664304	4.721710874	14.22162824
14:35:49.762	0.048869163	0.048869163	1.365881511	2.981567928	9.305749447	9.305749447	12.2441727	15.34763145	23.13780614	26.759164	30.32941301	28.28135576	28.20307655	28.20307655	26.79059449	19.3112323	4.723585825	14.22495776
14:35:50.733	0.048903345	0.048903345	1.366526869	2.982729855	9.308363142	9.308363142	12.24762504	15.35197961	23.14438657	26.76678128	30.33800427	28.28951433	28.21126244	28.21126244	26.79770734	19.31577946	4.725443691	14.22825672
14:35:51.714	0.048937893	0.048937893	1.36717897	2.983903878	9.311003945	9.311003945	12.25111318	15.35637286	23.1510352	26.77447745	30.34668443	28.29775728	28.21953297	28.21953297	26.80489366	19.32037354	4.727320843	14.23158972
14:35:52.688	0.048972206	0.048972206	1.367826508	2.985069639	9.313626063	9.313626063	12.25457664	15.36073499	23.15763673	26.78211904	30.35530295	28.30594166	28.22774473	28.22774473	26.81202882	19.32493486	4.729184729	14.23489895
14:35:53.666	0.049006674	0.049006674	1.368476807	2.986240323	9.316259153	9.316259153	12.25805459	15.36511537	23.16426583	26.78979249	30.36395732	28.31416006	28.2359906	28.2359906	26.81919354	19.32951503	4.731056432	14.23822184
14:35:54.644	0.049041154	0.049041154	1.369127196	2.987411125	9.318892405	9.318892405	12.26153275	15.36949599	23.17089527	26.79746629	30.372612	28.32237872	28.24423671	28.24423671	26.82635838	19.33409523	4.732928266	14.24154475
14:35:55.617	0.04907547	0.04907547	1.369774358	2.98857607	9.321512382	9.321512382	12.26499338	15.37385451	23.17749124	26.80510128	30.38122283	28.33055571	28.252441	28.252441	26.83348678	19.33865208	4.734790681	14.24485072
14:35:56.588	0.049109729	0.049109729	1.370420286	2.989738748	9.324127156	9.324127156	12.26844713	15.37820436	23.18407404	26.81272099	30.38981634	28.33871622	28.26062872	28.26062872	26.84060072	19.34319964	4.736649413	14.24814994
14:35:57.564	0.049144178	0.049144178	1.37106964	2.990907544	9.326755585	9.326755585	12.27191892	15.3825769	23.19069117	26.82038037	30.39845451	28.34691911	28.26885895	28.26885895	26.84775149	19.3477707	4.738517871	14.25146619
14:35:58.543	0.049178746	0.049178746	1.371721086	2.992080058	9.329392271	9.329392271	12.27540161	15.38696316	23.19732902	26.82806368	30.40711958	28.35514751	28.27711476	28.27711476	26.85492441	19.35235585	4.740392214	14.25479267
14:35:59.518	0.049213186	0.049213186	1.372369976	2.993247924	9.332018399	9.332018399	12.27887035	15.39133184	23.20394024	26.8357161	30.41574973	28.36334272	28.28533724	28.28533724	26.86206827	19.35692239	4.74225907	14.25810563
14:36:00.504	0.049248028	0.049248028	1.373026282	2.994429087	9.334674318	9.334674318	12.28237844	15.39575006	23.21062639	26.8434552	30.42447755	28.37163064	28.29365273	28.29365273	26.86929285	19.36154046	4.744147122	14.26145598
14:37:15.753	0.051953246	0.051953246	1.423438974	3.084984289	9.537911684	9.537911684	12.55081771	15.73377344	23.72205129	27.43521899	31.09153507	29.00495011	28.92900896	28.92900896	27.42097381	19.71399888	4.888688078	14.51713455
14:37:16.737	0.051989303	0.051989303	1.424102813	3.086174123	9.54057634	9.54057634	12.55433711	15.73820424	23.72875335	27.44297083	31.10026858	29.01324013	28.93732459	28.93732459	27.4281894	19.71860598	4.890584108	14.52047623
14:37:17.713	0.052025087	0.052025087	1.424761392	3.087354456	9.543219549	9.543219549	12.55782817	15.74259934	23.73540138	27.45066008	31.10893144	29.02146304	28.94557287	28.94557287	27.43534642	19.72317559	4.892464905	14.52379071
14:37:18.694	0.052061074	0.052061074	1.425423482	3.088541004	9.545876511	9.545876511	12.5613374	15.74701728	23.74208391	27.45838914	31.11763902	29.02972834	28.95386364	28.95386364	27.44254016	19.72776858	4.894355515	14.52712213
14:37:19.656	0.052096384	0.052096384	1.426072875	3.089704727	9.548482197	9.548482197	12.5647789	15.75134994	23.74863738	27.46596885	31.1261782	29.03783375	28.961994	28.961994	27.44959457	19.73227252	4.896209665	14.53038895
14:37:20.643	0.052132632	0.052132632	1.42673929	3.090898874	9.551155838	9.551155838	12.56831015	15.75579555	23.75536166	27.47374603	31.13493971	29.04615014	28.97033596	28.97033596	27.45683245	19.73689352	4.898112199	14.53374067
14:37:21.618	0.052168459	0.052168459	1.427397738	3.09207867	9.55379718	9.55379718	12.57179874	15.76018743	23.76200461	27.48142906	31.14359502	29.05436568	28.97857672	28.97857672	27.46398237	19.74145828	4.899991777	14.53705158
14:37:22.592	0.05220427	0.05220427	1.428055656	3.093257441	9.556436059	9.556436059	12.57528407	15.76457518	23.76864128	27.48910472	31.1522419	29.06257316	28.98680937	28.98680937	27.47112511	19.74601837	4.90186963	14.5403591
14:37:23.577	0.052240506	0.052240506	1.428721143	3.094449695	9.559104951	9.559104951	12.57880904	15.76901281	23.77535333	27.49686748	31.16098675	29.07087358	28.99513522	28.99513522	27.47834856	19.75062991	4.903768869	14.54370392
14:37:24.560	0.052276689	0.052276689	1.429385422	3.095639709	9.561768654	9.561768654	12.58232715	15.77344177	23.78205223	27.50461494	31.16971424	29.07915746	29.00344444	29.00344444	27.48555745	19.75523206	4.905664444	14.54704193
14:37:25.524	0.052312193	0.052312193	1.430037002	3.096806894	9.564381091	9.564381091	12.58577754	15.77778547	23.78862211	27.51221309	31.17827338	29.08728151	29.01159331	29.01159331	27.49262707	19.75974522	4.907523564	14.55031537
14:37:26.511	0.052348565	0.052348565	1.430704273	3.098002111	9.567056095	9.567056095	12.58931057	15.78223316	23.79534924	27.51999302	31.18703715	29.09559973	29.01993691	29.01993691	27.49986548	19.76436605	4.909427238	14.5536669
14:37:27.475	0.052384111	0.052384111	1.431356136	3.099169652	9.56966899	9.56966899	12.59276156	15.78657755	23.80192007	27.5275921	31.19559707	29.10372441	29.02808635	29.02808635	27.50693531	19.76887918	4.911286739	14.5569403
14:37:28.460	0.052420451	0.052420451	1.43202235	3.100362817	9.572339054	9.572339054	12.59628806	15.79101697	23.80863458	27.53535724	31.2043439	29.11202645	29.03641366	29.03641366	27.51415929	19.77349063	4.913186955	14.560285
14:37:29.438	0.052456555	0.052456555	1.432683973	3.101547681	9.574990369	9.574990369	12.59978979	15.79542518	23.81530183	27.54306764	31.21302894	29.12026977	29.04468204	29.04468204	27.52133201	19.77806927	4.915073856	14.56360589
14:37:30.407	0.052492348	0.052492348	1.433339659	3.102721835	9.577617545	9.577617545	12.60325963	15.79979323	23.82190829	27.55070765	31.22163453	29.12843765	29.05287471	29.05287471	27.5284389	19.7826058	4.916943607	14.56689623
14:37:31.384	0.052528457	0.052528457	1.434000904	3.103905865	9.580266643	9.580266643	12.60675843	15.80419769	23.82856978	27.55841119	31.23031156	29.13667326	29.0611353	29.0611353	27.53560455	19.78717976	4.918828988	14.57021371
14:37:32.365	0.052564735	0.052564735	1.434665005	3.105094929	9.582926827	9.582926827	12.61027186	15.80862055	23.83525904	27.56614676	31.23902452	29.14494293	29.06943	29.06943	27.54279965	19.79177242	4.920722288	14.57354474
14:37:33.339	0.052600777	0.052600777	1.435324521	3.106275704	9.585568292	9.585568292	12.61376056	15.81301225	23.84190113	27.57382769	31.24767578	29.15315399	29.07766589	29.07766589	27.54994359	19.79633234	4.922602295	14.57685201
14:37:34.319	0.052637062	0.052637062	1.435988252	3.107463944	9.588226277	9.588226277	12.61727108	15.81743139	23.84858466	27.58155645	31.25638077	29.16141598	29.08595284	29.08595284	27.55713165	19.80092034	4.924494089	14.58017963
14:37:35.293	0.052673146	0.052673146	1.43664807	3.1086451	9.59086824	9.59086824	12.62076044	15.82182386	23.8552278	27.5892384	31.26503291	29.16962775	29.09418938	29.09418938	27.56427584	19.80548025	4.926374509	14.58348687
14:37:36.261	0.05270903	0.05270903	1.437303975	3.109819171	9.593494178	9.593494178	12.62422862	15.82618966	23.86183054	27.59687355	31.27363218	29.1777893	29.10237551	29.10237551	27.57137616	19.81001207	4.928243551	14.58677372
14:37:37.240	0.052745344	0.052745344	1.43796749	3.111006783	9.596150222	9.596150222	12.62773657	15.83060547	23.86850889	27.60459603	31.28232966	29.186044	29.11065504	29.11065504	27.57855734	19.81459541	4.930134052	14.59009793
14:37:38.224	0.052781866	0.052781866	1.438634552	3.112200662	9.598820099	9.598820099	12.63126278	15.83504425	23.87522191	27.6123585	31.29107205	29.19434126	29.11897723	29.11897723	27.58577536	19.81920218	4.932034429	14.59343911
14:37:39.199	0.052818076	0.052818076	1.439295669	3.113383816	9.601465812	9.601465812	12.63475707	15.83944282	23.88187407	27.62005051	31.29973492	29.202563	29.12722364	29.12722364	27.59292749	19.82376681	4.933917637	14.59674972
14:37:40.168	0.052854085	0.052854085	1.439952877	3.114559896	9.604095526	9.604095526	12.63823023	15.84381476	23.8884859	27.62769579	31.30834502	29.2107346	29.13541972	29.13541972	27.60003583	19.82830339	4.935789486	14.60003999
14:37:41.154	0.052890749	0.052890749	1.440621776	3.115756814	9.606771649	9.606771649	12.64176467	15.84826383	23.89521432	27.63547577	31.31710667	29.21904998	29.14375997	29.14375997	27.60726905	19.83291959	4.937694399	14.60338797
14:37:42.123	0.052926802	0.052926802	1.441279296	3.116933288	9.609401881	9.609401881	12.64523851	15.85263656	23.90182725	27.64312212	31.32571769	29.22722233	29.15195675	29.15195675	27.61437767	19.83745618	4.939566677	14.60667822
14:37:43.105	0.052963363	0.052963363	1.441945806	3.118125765	9.612067706	9.612067706	12.64875935	15.85706844	23.90852956	27.65087173	31.33444483	29.23550484	29.16026397	29.16026397	27.62158193	19.84205371	4.941464322	14.61001264
14:37:44.077	0.052999573	0.052999573	1.442605686	3.119306296	9.614706641	9.614706641	12.65224467	15.86145558	23.91516416	27.65854294	31.34308355	29.24370338	29.16848693	29.16848693	27.62871296	19.84660442	4.943342855	14.6133131
14:37:45.056	0.053036068	0.053036068	1.443270481	3.120495536	9.617364859	9.617364859	12.65575545	15.86587474	23.92184714	27.66627	31.35178499	29.25196139	29.17676951	29.17676951	27.63589552	19.85118792	4.945235146	14.61663733
14:37:46.024	0.053072175	0.053072175	1.443927972	3.121671626	9.619993502	9.619993502	12.65922717	15.8702447	23.92845566	27.67391085	31.36038923	29.26012708	29.18495947	29.18495947	27.64299761	19.85571998	4.947106413	14.61992423
14:37:47.012	0.053109052	0.053109052	1.444599213	3.122872229	9.622676741	9.622676741	12.66277099	15.87470538	23.93520132	27.68171019	31.36917176	29.26846193	29.19331905	29.19331905	27.65024662	19.8603457	4.949016577	14.62327906
14:37:47.981	0.053145242	0.053145242	1.445257712	3.124049956	9.625308669	9.625308669	12.66624704	15.87908074	23.94181789	27.68936016	31.37778595	29.27663695	29.20151829	29.20151829	27.65735645	19.86488252	4.950890245	14.62656939
14:37:48.967	0.053182091	0.053182091	1.445927929	3.125248554	9.627987047	9.627987047	12.66978444	15.88353328	23.94855112	27.69714491	31.38655176	29.28495581	29.20986177	29.20986177	27.66459117	19.86949893	4.952797012	14.62991744
14:37:49.936	0.053218329	0.053218329	1.446586764	3.126426712	9.630619565	9.630619565	12.67326125	15.88790954	23.95516895	27.70479615	31.39516707	29.29313179	29.21806189	29.21806189	27.67170144	19.87403584	4.954671161	14.63320781
14:37:50.911	0.053254814	0.053254814	1.447249842	3.127612374	9.633268659	9.633268659	12.67675996	15.89231333	23.96182835	27.71249534	31.40383623	29.3013588	29.22631318	29.22631318	27.67885591	19.87860087	4.956557143	14.63651856
14:37:51.891	0.05329151	0.05329151	1.447916493	3.128804338	9.635931644	9.635931644	12.68027702	15.89674017	23.96852256	27.72023468	31.41255043	29.30962851	29.23460725	29.23460725	27.68604731	19.88318935	4.958453046	14.63984632
14:37:52.861	0.053327854	0.053327854	1.448576509	3.129984353	9.638567743	9.638567743	12.68375855	15.90112229	23.97514908	27.72789565	31.42117624	29.31781427	29.24281709	29.24281709	27.69316552	19.88773105	4.960329838	14.64314013
14:37:53.846	0.053364786	0.053364786	1.449246911	3.131182849	9.641244934	9.641244934	12.68729436	15.90557268	23.98187878	27.73567581	31.4299361	29.32612719	29.25115442	29.25115442	27.7003941	19.89234308	4.962235918	14.64648493
14:37:54.817	0.053401216	0.053401216	1.449907953	3.132364525	9.643884363	9.643884363	12.69078029	15.90996026	23.98851345	27.743346	31.43857199	29.33432239	29.25937367	29.25937367	27.70752013	19.89688958	4.964115145	14.6497822
14:37:55.803	0.053438234	0.053438234	1.450579389	3.133564695	9.646564904	9.646564904	12.69432051	15.91441615	23.99525135	27.75113544	31.44734196	29.34264479	29.26772043	29.26772043	27.71475655	19.90150641	4.966023674	14.65313046
14:37:56.771	0.0534746	0.0534746	1.451238737	3.134743171	9.6491968	9.6491968	12.69779648	15.91879113	24.00186686	27.75878328	31.45595238	29.3508157	29.27591524	29.27591524	27.72186107	19.906039	4.967897601	14.65641761
14:37:57.757	0.053511666	0.053511666	1.451910525	3.135943792	9.651877954	9.651877954	12.7013375	15.92324797	24.00860608	27.76657403	31.46472352	29.35913907	29.28426292	29.28426292	27.72909795	19.91065593	4.969806632	14.65976592
14:37:58.733	0.053548381	0.053548381	1.452575678	3.137132466	9.654532234	9.654532234	12.70484302	15.92766009	24.01527764	27.77428646	31.47340632	29.36737856	29.29252643	29.29252643	27.73626169	19.91522611	4.971696561	14.6630803
14:37:59.712	0.053585234	0.053585234	1.453243055	3.138325027	9.657194997	9.657194997	12.70835975	15.93208629	24.02197041	27.78202329	31.48211644	29.37564391	29.30081585	29.30081585	27.74344773	19.91981041	4.973592563	14.66640492
14:39:15.491	0.056518913	0.056518913	1.505472334	3.231358569	9.864262631	9.864262631	12.98182068	16.27616504	24.5420533	28.38288831	32.1580336	30.01684167	29.94375856	29.94375856	28.30024549	20.27469204	5.121142522	14.92372757
14:39:16.478	0.056558258	0.056558258	1.506160405	3.232580022	9.866971961	9.866971961	12.98539852	16.28066535	24.54885291	28.39073909	32.1668574	30.02520932	29.95214726	29.95214726	28.30750221	20.27931257	5.123074648	14.92707727
14:39:17.451	0.056597077	0.056597077	1.506838929	3.233784414	9.869643198	9.869643198	12.98892604	16.28510235	24.55555676	28.39847919	32.17555659	30.03345873	29.96041736	29.96041736	28.31465613	20.28386753	5.124979651	14.93037941
14:39:18.430	0.056636165	0.056636165	1.507521848	3.234996493	9.87233123	9.87233123	12.99247574	16.28956719	24.56230262	28.40626765	32.18430993	30.0417594	29.96873882	29.96873882	28.32185424	20.28845049	5.126896673	14.93370184
14:39:19.400	0.056674925	0.056674925	1.508198698	3.236197689	9.874994876	9.874994876	12.99599323	16.29399149	24.56898714	28.41398515	32.19298332	30.04998418	29.97698414	29.97698414	28.32898628	20.29299127	5.128796345	14.93699367
14:39:20.384	0.056714277	0.056714277	1.508885537	3.237416498	9.877697324	9.877697324	12.99956196	16.29848019	24.57576889	28.42181477	32.20178249	30.05832816	29.98534892	29.98534892	28.33622143	20.29759755	5.130723733	14.94033297
14:39:21.359	0.056753299	0.056753299	1.509566306	3.238624423	9.880375383	9.880375383	13.00309847	16.30292833	24.58248929	28.42957343	32.21050171	30.06659624	29.99363755	29.99363755	28.3433905	20.30216165	5.13263377	14.94364167
14:39:22.329	0.056792152	0.056792152	1.510243802	3.239826427	9.883040068	9.883040068	13.00661732	16.30735421	24.58917598	28.43729304	32.21917684	30.07482243	30.00188415	30.00188415	28.35052299	20.30670233	5.134534308	14.94693338
14:39:23.314	0.056831638	0.056831638	1.51093199	3.241047288	9.885746299	9.885746299	13.01019102	16.31184905	24.59596678	28.4451327	32.22798667	30.08317628	30.01025868	30.01025868	28.3577659	20.31131318	5.136464522	14.95027594
14:39:24.293	0.056870914	0.056870914	1.511616196	3.24226097	9.888436363	9.888436363	13.01374337	16.31631698	24.60271686	28.45292522	32.23674332	30.09147961	30.01858251	30.01858251	28.36496475	20.31589585	5.138383245	14.95359805
14:39:25.264	0.056909901	0.056909901	1.512295026	3.243465003	9.891104789	9.891104789	13.01726714	16.32074894	24.60941251	28.46065476	32.24542898	30.09971556	30.02683875	30.02683875	28.37210492	20.32044105	5.140286577	14.95689299
14:39:26.250	0.056949521	0.056949521	1.51298456	3.244687908	9.893814788	9.893814788	13.02084579	16.32524989	24.61621232	28.46850441	32.25424941	30.10807921	30.03522296	30.03522296	28.37935555	20.32505643	5.142219603	14.96023878
14:39:27.222	0.05698861	0.05698861	1.513664519	3.245893719	9.896486654	9.896486654	13.02437409	16.32968746	24.62291631	28.4762433	32.26294518	30.11632458	30.04348855	30.04348855	28.38650337	20.32960624	5.144125471	14.96353702
14:39:28.201	0.057028012	0.057028012	1.514349595	3.247108491	9.899178123	9.899178123	13.02792827	16.33415754	24.62966933	28.48403867	32.2717042	30.12462985	30.05181414	30.05181414	28.39370286	20.33418882	5.146045363	14.966859
14:39:29.176	0.057067284	0.057067284	1.515032078	3.248318555	9.901858911	9.901858911	13.03146833	16.33860983	24.63639541	28.4918028	32.2804279	30.13290155	30.06010603	30.06010603	28.40087299	20.33875258	5.147957676	14.97016733
14:39:30.155	0.057106749	0.057106749	1.515717578	3.249533853	9.904551044	9.904551044	13.03502337	16.34308092	24.64314981	28.49959948	32.28918798	30.14120766	30.06843238	30.06843238	28.40807269	20.34333504	5.149878124	14.97348919
14:39:31.119	0.057145639	0.057145639	1.516392788	3.250730799	9.907202276	9.907202276	13.03852439	16.34748403	24.64980145	28.50727741	32.29781443	30.14938699	30.07663158	30.07663158	28.41516225	20.34784728	5.151769435	14.97676013
14:39:32.106	0.057185489	0.057185489	1.517084322	3.251956571	9.909917106	9.909917106	13.04210938	16.35199271	24.65661249	28.51513921	32.30664726	30.15776192	30.08502682	30.08502682	28.42242108	20.35246712	5.153706155	14.98010906
14:39:33.077	0.057224724	0.057224724	1.517764862	3.253162743	9.912588276	9.912588276	13.04563672	16.35642884	24.66331386	28.52287428	32.31533749	30.16600157	30.0932864	30.0932864	28.4295624	20.35701206	5.15561177	14.98340367
14:39:34.057	0.057264354	0.057264354	1.518451927	3.254380368	9.915284559	9.915284559	13.04919721	16.36090663	24.67007808	28.53068176	32.32410887	30.17431809	30.10162298	30.10162298	28.43677008	20.3615991	5.15753534	14.9867288
14:39:35.035	0.057303935	0.057303935	1.519137808	3.255595781	9.917975695	9.917975695	13.05275089	16.36537581	24.67682925	28.53847403	32.33286296	30.18261813	30.109943	30.109943	28.44396323	20.36617677	5.159455279	14.99004711
14:39:36.006	0.057343263	0.057343263	1.51981899	3.256802757	9.920647905	9.920647905	13.05627957	16.36981352	24.68353278	28.54621119	32.34155493	30.1908592	30.11820387	30.11820387	28.45110502	20.37072164	5.161361755	14.99334162
14:39:36.977	0.057382623	0.057382623	1.520500384	3.25801	9.923320458	9.923320458	13.0598087	16.37425175	24.69023704	28.55394905	32.35024749	30.19910074	30.12646516	30.12646516	28.45824695	20.37526647	5.163268515	14.9966361
14:39:37.956	0.057422338	0.057422338	1.521187613	3.259227469	9.926015399	9.926015399	13.06336738	16.3787271	24.6969973	28.56175143	32.35901231	30.20741072	30.13479502	30.13479502	28.46544795	20.37984877	5.165191288	14.99995771
14:39:38.942	0.057462368	0.057462368	1.521879969	3.260453907	9.928729943	9.928729943	13.06695194	16.38323497	24.7038066	28.56961025	32.36784033	30.21578055	30.14318481	30.14318481	28.47270053	20.38446377	5.167128087	15.00330302
14:39:39.908	0.057501618	0.057501618	1.5225585	3.261655746	9.931389796	9.931389796	13.07046427	16.38765195	24.71047856	28.57731043	32.37648995	30.22398115	30.15140493	30.15140493	28.47980623	20.38898518	5.169025904	15.00658047
14:39:40.894	0.057541712	0.057541712	1.523251291	3.262882731	9.93410505	9.93410505	13.07404974	16.39216089	24.71728933	28.58517069	32.38531917	30.23235196	30.15979561	30.15979561	28.48705915	20.39360015	5.170963289	15.00992572
14:39:41.865	0.057581227	0.057581227	1.523933757	3.26409132	9.936779348	9.936779348	13.07758113	16.39660177	24.72399723	28.59291208	32.39401468	30.24059591	30.16805909	30.16805909	28.4942019	20.39814489	5.172871491	15.01322006
14:39:42.850	0.057621343	0.057621343	1.524626286	3.265317618	9.939492583	9.939492583	13.08116392	16.40110725	24.73080264	28.60076588	32.40283623	30.24895928	30.17644224	30.17644224	28.50144787	20.40275519	5.174807515	15.0165619
14:39:43.820	0.057660879	0.057660879	1.525308479	3.266525502	9.942164832	9.942164832	13.08469258	16.40554463	24.73750511	28.60850074	32.41152399	30.25719573	30.18469811	30.18469811	28.50858361	20.40729524	5.176714332	15.0198528
14:39:44.794	0.05770061	0.05770061	1.525993706	3.267738649	9.944848478	9.944848478	13.08823628	16.41000088	24.74423601	28.61626828	32.42024825	30.26546672	30.19298855	30.19298855	28.51574902	20.41185404	5.17862932	15.02315728
14:39:45.779	0.057740821	0.057740821	1.526686881	3.268965756	9.947562758	9.947562758	13.09182042	16.41450794	24.7510436	28.62412418	32.42907154	30.27383151	30.20137298	30.20137298	28.52299544	20.41646426	5.180566206	15.02649901
14:39:46.751	0.057780533	0.057780533	1.527371128	3.270176948	9.950241588	9.950241588	13.09535774	16.41895609	24.75776213	28.63187718	32.43777906	30.28208647	30.20964727	30.20964727	28.53014646	20.42101366	5.182477835	15.02979665
14:39:47.722	0.057820235	0.057820235	1.528054891	3.271387174	9.95291804	9.95291804	13.09889191	16.42340024	24.76447455	28.63962299	32.4464783	30.2903335	30.21791358	30.21791358	28.53729036	20.42555842	5.184387804	15.0330909
14:39:48.694	0.057860008	0.057860008	1.528739567	3.272598907	9.955597581	9.955597581	13.10243015	16.42784947	24.77119456	28.64737744	32.45518705	30.29858947	30.22618879	30.22618879	28.54444174	20.43010782	5.186300016	15.03638851
14:39:49.685	0.057900591	0.057900591	1.529437844	3.2738346	9.958329856	9.958329856	13.10603801	16.43238621	24.77804668	28.65528418	32.46406663	30.30700731	30.2346262	30.2346262	28.55173308	20.43474613	5.188249899	15.03975055
14:39:50.655	0.057940345	0.057940345	1.530121539	3.275044378	9.961004587	9.961004587	13.10956988	16.43682735	24.78475434	28.6630241	32.47275865	30.31524726	30.24288528	30.24288528	28.5588701	20.43928615	5.190158753	15.04304133
14:39:51.640	0.057980746	0.057980746	1.530816034	3.276273154	9.963721073	9.963721073	13.11315687	16.44133777	24.79156657	28.67088454	32.4815858	30.32361525	30.25127264	30.25127264	28.56611775	20.44389643	5.192097445	15.04638301
14:39:52.604	0.058020316	0.058020316	1.531495929	3.277475992	9.966379976	9.966379976	13.11666781	16.44575253	24.79823424	28.67857805	32.49022531	30.33180528	30.25948159	30.25948159	28.57321101	20.44840838	5.193995079	15.04965342
14:39:53.590	0.058060821	0.058060821	1.532191558	3.278706555	9.969099922	9.969099922	13.12025934	16.45026858	24.80505484	28.68644789	32.49906262	30.34018273	30.26787834	30.26787834	28.58046634	20.4530233	5.195936316	15.05299845
14:39:54.560	0.0581007	0.0581007	1.532876122	3.279917436	9.971776119	9.971776119	13.1237931	16.45471195	24.81176559	28.69419084	32.50775723	30.34842485	30.27613941	30.27613941	28.58760422	20.4575634	5.197846366	15.05628923
14:39:55.540	0.058141021	0.058141021	1.533567955	3.281141066	9.974480251	9.974480251	13.12736373	16.45920165	24.81854623	28.7020143	32.51654206	30.3567524	30.28448606	30.28448606	28.59481583	20.46215028	5.199776392	15.0596139
14:39:56.516	0.05818121	0.05818121	1.534257183	3.282359977	9.977173712	9.977173712	13.13092026	16.46367357	24.82529997	28.70980659	32.52529167	30.3650465	30.29279914	30.29279914	28.60199822	20.46671845	5.201698838	15.062925
14:39:57.486	0.058221182	0.058221182	1.534942383	3.283571659	9.979850957	9.979850957	13.13445536	16.46811852	24.8320129	28.71755166	32.53398807	30.37329007	30.30106153	30.30106153	28.6091366	20.47125851	5.203609746	15.06621571
14:39:58.475	0.058261969	0.058261969	1.535641234	3.284807369	9.982581046	9.982581046	13.13806023	16.47265115	24.83885818	28.72544929	32.54285556	30.38169576	30.30948637	30.30948637	28.61641511	20.47588758	5.205558411	15.06957092
14:39:59.446	0.058302045	0.058302045	1.536327576	3.286020853	9.98526179	9.98526179	13.14159992	16.47710181	24.84557959	28.73320388	32.55156224	30.38994892	30.31775829	30.31775829	28.6235613	20.48043238	5.20747189	15.07286504
14:40:00.419	0.058342234	0.058342234	1.537015551	3.287237116	9.987948433	9.987948433	13.1451474	16.4815622	24.85231564	28.74097522	32.56028753	30.39821966	30.32604778	30.32604778	28.63072246	20.48498658	5.209389617	15.07616596
14:41:15.878	0.061552396	0.061552396	1.59100031	3.382354692	10.19734349	10.19734349	13.42158201	16.82902754	25.37685731	29.34573745	33.23868661	31.04105371	30.9702148	30.9702148	29.18657146	20.83814894	5.358955808	15.3321068
14:41:16.857	0.061595236	0.061595236	1.591708566	3.383598557	10.20007284	10.20007284	13.42518431	16.83355412	25.38368833	29.35360807	33.24750798	31.04940982	30.97858672	30.97858672	29.19378745	20.84272958	5.36090647	15.33542609
14:41:17.836	0.061638107	0.061638107	1.592417014	3.384842661	10.20280249	10.20280249	13.42878698	16.83808114	25.39051995	29.36147926	33.25632979	31.05776628	30.98695895	30.98695895	29.20100351	20.84731017	5.362857375	15.33874534
14:41:18.805	0.061680569	0.061680569	1.593118421	3.3860743	10.20550457	10.20550457	13.43235324	16.84256238	25.39728243	29.36927066	33.26506198	31.06603778	30.99524602	30.99524602	29.20814598	20.85184395	5.364788604	15.34203067
14:41:19.795	0.061723983	0.061723983	1.593835224	3.387332873	10.20826552	10.20826552	13.43599717	16.84714117	25.40419208	29.37723149	33.27398387	31.07448889	31.00371302	31.00371302	29.2154433	20.85647592	5.366761932	15.34538714
14:41:20.765	0.061766549	0.061766549	1.594537739	3.388566261	10.210971	10.210971	13.43956786	16.85162791	25.41096275	29.38503207	33.28272598	31.08276965	31.01200929	31.01200929	29.2225933	20.86101428	5.368695641	15.34867577
14:41:21.735	0.061809145	0.061809145	1.595240452	3.3897999	10.21367682	10.21367682	13.44313897	16.85611514	25.4177341	29.39283331	33.29146864	31.09105086	31.02030599	31.02030599	29.22974346	20.86555265	5.370629613	15.3519644
14:41:22.722	0.061852518	0.061852518	1.595955675	3.391055399	10.21643036	10.21643036	13.44677304	16.86068145	25.42462473	29.40077183	33.30036496	31.09947756	31.02874841	31.02874841	29.23701899	20.8701705	5.372597723	15.35531062
14:41:23.688	0.061894997	0.061894997	1.596655872	3.392284424	10.21912562	10.21912562	13.45033016	16.86515105	25.43136935	29.40854203	33.30907247	31.10772533	31.03701154	31.03701154	29.24413982	20.87469006	5.374524202	15.35858562
14:41:24.674	0.061938387	0.061938387	1.597370768	3.39353915	10.22187703	10.22187703	13.45396136	16.86971368	25.43825432	29.41647378	33.31796081	31.11614432	31.04544617	31.04544617	29.25140824	20.87930319	5.376490835	15.36192841
14:41:25.649	0.061981323	0.061981323	1.598077882	3.394780119	10.22459805	10.22459805	13.45755242	16.87422586	25.44506309	29.42431762	33.32675046	31.12446977	31.05378704	31.05378704	29.25859566	20.88386483	5.378435774	15.36523388
14:41:26.623	0.062024245	0.062024245	1.598784465	3.396020058	10.22731659	10.22731659	13.46114019	16.87873387	25.45186551	29.43215402	33.33553158	31.13278707	31.06211972	31.06211972	29.26577582	20.88842176	5.380378969	15.36853593
14:41:27.593	0.06206702	0.06206702	1.599488338	3.397255143	10.23002428	10.23002428	13.4647136	16.8832238	25.4586406	29.43995881	33.3442771	31.14107058	31.07041852	31.07041852	29.27292659	20.89295994	5.382314427	15.37182439
14:41:28.580	0.062110575	0.062110575	1.600204743	3.39851212	10.23277974	10.23277974	13.46835003	16.88779289	25.46553507	29.44790099	33.35317639	31.14949967	31.07886312	31.07886312	29.28020278	20.89757763	5.384284058	15.37517046
14:41:29.560	0.062153852	0.062153852	1.600916267	3.399760434	10.235516	10.235516	13.47196108	16.89233005	25.47238132	29.45578749	33.36201309	31.15786941	31.08724822	31.08724822	29.28742751	20.90216256	5.386239982	15.37849279
14:41:30.524	0.062196451	0.062196451	1.601616364	3.400988602	10.23820788	10.23820788	13.47551354	16.89679357	25.47911639	29.46354581	33.37070597	31.16610286	31.09549676	31.09549676	29.29453438	20.9066726	5.388164213	15.38176085
14:41:31.500	0.062239611	0.062239611	1.602325371	3.402232305	10.24093359	10.24093359	13.47911063	16.90131312	25.48593596	29.47140132	33.37950758	31.17443923	31.10384837	31.10384837	29.30172984	20.91123878	5.390112651	15.38506957
14:41:32.476	0.062282801	0.062282801	1.603034571	3.40347625	10.24365962	10.24365962	13.4827081	16.90583313	25.49275616	29.47925744	33.38830967	31.18277599	31.11220033	31.11220033	29.30892542	20.91580493	5.39206134	15.38837827
14:41:33.465	0.062326597	0.062326597	1.603753419	3.404737015	10.24642229	10.24642229	13.4863539	16.91041382	25.49966786	29.48721883	33.39722953	31.19122422	31.12066393	31.12066393	29.31621697	20.92043188	5.394036244	15.39173103
14:41:34.434	0.062369537	0.062369537	1.604457923	3.405972527	10.24912941	10.24912941	13.48992635	16.91490234	25.50644043	29.49501983	33.4059695	31.199502	31.12895674	31.12895674	29.32336119	20.92496525	5.395971461	15.39501597
14:41:35.410	0.062412817	0.062412817	1.605167708	3.407217205	10.2518564	10.2518564	13.493525	16.91942373	25.51326255	29.50287778	33.41477309	31.20783997	31.13730982	31.13730982	29.33055712	20.92953135	5.397920906	15.39832461
14:41:36.385	0.062456082	0.062456082	1.60587696	3.40846085	10.25458091	10.25458091	13.49712035	16.92394095	25.52007831	29.51072828	33.42356815	31.2161698	31.14565469	31.14565469	29.33774579	20.93409274	5.399868601	15.40162985
14:41:37.366	0.062499644	0.062499644	1.606590769	3.409712386	10.2573225	10.2573225	13.5007382	16.9284864	25.52693662	29.51862766	33.43241778	31.22455124	31.15405125	31.15405125	29.34497878	20.93868216	5.401828525	15.40495539
14:41:38.332	0.06254257	0.06254257	1.607293861	3.410945039	10.2600225	10.2600225	13.50430115	16.93296285	25.53369076	29.52640693	33.44113267	31.23280501	31.16231986	31.16231986	29.35210136	20.94320144	5.403758747	15.40823009
14:41:39.325	0.062586726	0.062586726	1.608016804	3.412212392	10.2627983	10.2627983	13.50796408	16.93756488	25.54063433	29.53440425	33.45009165	31.24128988	31.17081996	31.17081996	29.35942315	20.94784701	5.405743175	15.41159631
14:41:40.288	0.062629578	0.062629578	1.608718094	3.413441694	10.26549054	10.26549054	13.51151673	16.94202832	25.54736874	29.54216055	33.45878044	31.24951879	31.17906361	31.17906361	29.36652382	20.9523522	5.407667893	15.41486081
14:41:41.277	0.062673617	0.062673617	1.609438513	3.414704427	10.26825579	10.26825579	13.51516567	16.94661272	25.55428559	29.55012684	33.46770428	31.25797025	31.18753016	31.18753016	29.37381631	20.956979	5.409644823	15.41821341
14:41:42.248	0.062716885	0.062716885	1.610146023	3.415944438	10.27097106	10.27097106	13.51874864	16.95111419	25.56107728	29.55794886	33.47646632	31.2662684	31.19584311	31.19584311	29.38097628	20.96152164	5.411586048	15.42150503
14:41:43.224	0.062760405	0.062760405	1.610857365	3.417191069	10.27370061	10.27370061	13.52235043	16.95563928	25.56790454	29.56581172	33.48527392	31.27460964	31.20419918	31.20419918	29.38817321	20.96608762	5.413537508	15.42481356
14:41:44.199	0.062803911	0.062803911	1.61156817	3.418436662	10.27642768	10.27642768	13.52594891	16.96016018	25.57472543	29.57366712	33.49407298	31.28294272	31.21254705	31.21254705	29.39536286	20.9706489	5.415487214	15.42811868
14:41:45.174	0.062847446	0.062847446	1.612279169	3.4196825	10.27915508	10.27915508	13.52954778	16.96468155	25.58154696	29.58152313	33.50287255	31.29127621	31.22089529	31.22089529	29.40255265	20.97521018	5.417437172	15.43142379
14:41:46.145	0.062890833	0.062890833	1.612987444	3.420923469	10.2818716	10.2818716	13.53313228	16.96918483	25.58834115	29.58934753	33.51163652	31.29957593	31.22920967	31.22920967	29.40971308	20.97975274	5.419379381	15.43471533
14:41:47.124	0.062934607	0.062934607	1.613701756	3.422174918	10.28461086	10.28461086	13.53674674	16.97372571	25.59519203	29.59723709	33.52047329	31.30794452	31.23759302	31.23759302	29.41693269	20.98433276	5.421337863	15.43803402
14:41:48.098	0.062978188	0.062978188	1.614412603	3.423420202	10.28733641	10.28733641	13.54034308	16.97824381	25.60200848	29.60508686	33.52926532	31.31627068	31.24593381	31.24593381	29.42411547	20.98888932	5.423286567	15.4413357
14:41:49.083	0.063022291	0.063022291	1.615131681	3.424679808	10.29009309	10.29009309	13.54398047	16.98281344	25.60890261	29.61302599	33.53815723	31.32469136	31.25436927	31.25436927	29.43137957	20.99349737	5.425257551	15.44467469
14:41:50.062	0.063066156	0.063066156	1.615846573	3.425931984	10.29283329	10.29283329	13.54759609	16.98735569	25.61575539	29.62091735	33.54699546	31.33306114	31.2627537	31.2627537	29.43859953	20.99807734	5.427216778	15.44799332
14:41:51.032	0.063109647	0.063109647	1.616555082	3.427172886	10.29554862	10.29554862	13.55117885	16.99185663	25.62254579	29.62873675	33.55575293	31.34135437	31.27106141	31.27106141	29.44575322	21.00261518	5.429158238	15.45128143
14:41:52.018	0.063153886	0.063153886	1.617275482	3.428434517	10.29830909	10.29830909	13.55482114	16.99643232	25.62944892	29.63668585	33.56465545	31.3497849	31.27950663	31.27950663	29.45302513	21.00722792	5.431131997	15.45462381
14:41:52.983	0.063197213	0.063197213	1.617980727	3.429669514	10.30101108	10.30101108	13.55838623	17.00091101	25.63620564	29.64446623	33.57336884	31.35803626	31.28777233	31.28777233	29.46014227	21.01174239	5.433063959	15.45789498
14:41:53.968	0.063241468	0.063241468	1.618700781	3.430930345	10.30376938	10.30376938	13.56202559	17.00548296	25.64310302	29.65240844	33.58226329	31.36645901	31.2962097	31.2962097	29.46740701	21.01635041	5.435036207	15.46123392
14:41:54.939	0.063285123	0.063285123	1.619410794	3.432173501	10.3064888	10.3064888	13.56561362	17.0099904	25.64990302	29.6602384	33.59103184	31.37476247	31.30452753	31.30452753	29.47456864	21.02089293	5.436980677	15.46452541
14:41:55.914	0.063328989	0.063328989	1.620123933	3.433422036	10.30921978	10.30921978	13.56921687	17.01451692	25.65673175	29.66810133	33.59983713	31.38310066	31.31288012	31.31288012	29.48175999	21.02545422	5.43893343	15.46783049
14:41:56.898	0.063373289	0.063373289	1.620843845	3.434682333	10.31197628	10.31197628	13.57285374	17.01908566	25.66362413	29.67603741	33.60872415	31.39151618	31.32131014	31.32131014	29.48901782	21.03005758	5.440904449	15.47116605
14:41:57.873	0.063417214	0.063417214	1.621557364	3.435931342	10.31470788	10.31470788	13.57645774	17.02361307	25.67045409	29.6839015	33.61753038	31.39985512	31.32966342	31.32966342	29.49620938	21.03461882	5.442857687	15.47447109
14:41:58.845	0.063461035	0.063461035	1.622268884	3.437176758	10.31743141	10.31743141	13.58005106	17.02812703	25.67726373	29.69174205	33.62631007	31.40816888	31.33799143	31.33799143	29.50337899	21.03916606	5.444805176	15.47776598
14:41:59.831	0.063505516	0.063505516	1.622990845	3.438440353	10.32019448	10.32019448	13.58369651	17.03270646	25.68417206	29.69969613	33.63521669	31.41660276	31.34643974	31.34643974	29.51065197	21.04377876	5.44678096	15.48110831
14:43:15.684	0.067018057	0.067018057	1.679104845	3.536369733	10.53371534	10.53371534	13.8652849	17.38635182	26.21752022	30.31340131	34.32186966	32.06661744	31.99747563	31.99747563	30.07052674	21.39861845	5.599512682	15.73822099
14:43:16.660	0.067064402	0.067064402	1.67983397	3.537638676	10.53647441	10.53647441	13.8689218	17.39091833	26.22440545	30.32131911	34.33072173	32.07499481	32.00586508	32.00586508	30.07773404	21.4031834	5.601486749	15.74152877
14:43:17.637	0.067110823	0.067110823	1.680564011	3.538909124	10.53923657	10.53923657	13.87256272	17.39548987	26.2312982	30.32924545	34.33958319	32.08338099	32.01426333	32.01426333	30.08494871	21.40775295	5.603463033	15.7448399
14:43:18.620	0.067157558	0.067157558	1.681298713	3.540187599	10.54201599	10.54201599	13.87622635	17.40008989	26.23823386	30.33722101	34.34849949	32.09181902	32.02271348	32.02271348	30.09220779	21.41235056	5.605451677	15.74817136
14:43:19.590	0.067203704	0.067203704	1.682023873	3.541449382	10.54475893	10.54475893	13.87984185	17.40462946	26.24507833	30.34509159	34.35729827	32.10014577	32.03105217	32.03105217	30.09937093	21.41688733	5.607414232	15.75145875
14:43:20.565	0.067250116	0.067250116	1.682752939	3.542717878	10.54751628	10.54751628	13.8834763	17.40919279	26.25195858	30.35300319	34.36614273	32.1085157	32.03943407	32.03943407	30.10657101	21.42144744	5.609387104	15.75476304
14:43:21.540	0.067296557	0.067296557	1.683482175	3.543986582	10.5502739	10.5502739	13.88711104	17.41375647	26.25883933	30.36091525	34.37498753	32.11688589	32.04781621	32.04781621	30.11377111	21.42600749	5.611360175	15.75806731
14:43:22.521	0.067343312	0.067343312	1.684216074	3.545263313	10.55304877	10.55304877	13.89076849	17.41834863	26.26576297	30.3688765	34.38388716	32.1253079	32.05625023	32.05625023	30.12101558	21.43059558	5.613345603	15.76139189
14:43:23.492	0.067389619	0.067389619	1.68494266	3.546527237	10.55579563	10.55579563	13.89438895	17.42289433	26.27261653	30.37675705	34.39269641	32.13364433	32.06459851	32.06459851	30.12818623	21.43513685	5.615310991	15.76468255
14:43:24.480	0.067436766	0.067436766	1.68568214	3.547813503	10.55859085	10.55859085	13.89807311	17.42751998	26.27959059	30.38477604	34.40166024	32.14212698	32.0730932	32.0730932	30.13548245	21.43975757	5.617310995	15.76803079
14:43:25.456	0.067483369	0.067483369	1.68641281	3.549084359	10.5613524	10.5613524	13.90171284	17.43208982	26.28648046	30.3926981	34.41051555	32.15050689	32.08148497	32.08148497	30.14269008	21.44432213	5.619286911	15.77133833
14:43:26.424	0.067529618	0.067529618	1.687137659	3.550345006	10.56409158	10.56409158	13.90532304	17.43662256	26.29331435	30.40055569	34.41929862	32.15881837	32.08980821	32.08980821	30.14983867	21.44884923	5.621246831	15.77461874
14:43:27.406	0.067576565	0.067576565	1.687873164	3.5516241	10.56687065	10.56687065	13.90898577	17.44122123	26.30024761	30.40852741	34.42820909	32.16725036	32.09825209	32.09825209	30.15709069	21.45344177	5.623235305	15.77794658
14:43:28.380	0.067623157	0.067623157	1.688602842	3.552892975	10.56962734	10.56962734	13.91261894	17.44578276	26.30712485	30.41643459	34.43704727	32.17561388	32.10662738	32.10662738	30.16428362	21.45799682	5.625207769	15.78124725
14:43:29.353	0.067669731	0.067669731	1.689331941	3.554160759	10.57238148	10.57238148	13.9162487	17.45033998	26.31399555	30.42433413	34.44587673	32.18396909	32.11499433	32.11499433	30.17146921	21.46254716	5.627178412	15.78454451
14:43:30.332	0.067716619	0.067716619	1.690065701	3.555436563	10.57515285	10.57515285	13.91990112	17.45492564	26.32090908	30.4322828	34.45476094	32.19237606	32.12341308	32.12341308	30.17869909	21.46712548	5.629161398	15.78786206
14:43:31.307	0.067763345	0.067763345	1.690796634	3.556707365	10.57791317	10.57791317	13.92353894	17.45949293	26.32779487	30.44019946	34.4636092	32.20074895	32.13179768	32.13179768	30.18589948	21.47168506	5.631136484	15.79116603
14:43:32.288	0.067810387	0.067810387	1.691532236	3.5579862	10.58069076	10.58069076	13.92719945	17.46408869	26.33472355	30.44816531	34.47251227	32.20917364	32.14023414	32.14023414	30.19314421	21.47627265	5.633123928	15.79449031
14:43:33.263	0.06785717	0.06785717	1.692263501	3.559257411	10.5834516	10.5834516	13.93083785	17.46865666	26.3416103	30.45608284	34.48136116	32.21754701	32.14861918	32.14861918	30.2003446	21.48083211	5.635099401	15.7977942
14:43:34.239	0.067904028	0.067904028	1.692995686	3.560530136	10.58621555	10.58621555	13.93448028	17.47322969	26.34850462	30.46400895	34.49021948	32.22592925	32.15701308	32.15701308	30.20755241	21.48539619	5.637077103	15.80110146
14:43:35.206	0.067950483	0.067950483	1.693721284	3.561791327	10.58895427	10.58895427	13.93808942	17.47776088	26.35533584	30.4718624	34.49899643	32.23423443	32.16532979	32.16532979	30.21469376	21.48991814	5.639036758	15.80437818
14:43:36.198	0.067998168	0.067998168	1.694465811	3.563085335	10.59176406	10.59176406	13.94179217	17.48240957	26.36234417	30.47991934	34.50800063	32.24275459	32.17386175	32.17386175	30.22201976	21.49455694	5.641047278	15.80773958
14:43:37.158	0.068044342	0.068044342	1.695186483	3.564337799	10.59448347	10.59448347	13.94537576	17.48690864	26.36912688	30.48771679	34.51671466	32.25100013	32.18211868	32.18211868	30.22910943	21.49904603	5.642993128	15.81099252
14:43:38.144	0.068091795	0.068091795	1.695926839	3.565624387	10.59727679	10.59727679	13.94905669	17.49152989	26.37609376	30.49572584	34.525665	32.25946921	32.19059945	32.19059945	30.23639111	21.50365664	5.644991869	15.8143335
14:43:39.123	0.068138941	0.068138941	1.696662113	3.566902059	10.60005056	10.60005056	13.95271182	17.49611872	26.38301172	30.50367854	34.53455219	32.26787848	32.1990203	32.1990203	30.24362116	21.50823449	5.646976632	15.81765077
14:43:40.094	0.068185728	0.068185728	1.697391535	3.568169477	10.6028019	10.6028019	13.95633732	17.50067034	26.38987355	30.51156659	34.54336697	32.27621918	32.20737247	32.20737247	30.25079205	21.51277483	5.648945346	15.82094085
14:43:41.074	0.068232978	0.068232978	1.698127887	3.569448855	10.60557901	10.60557901	13.95999674	17.50526451	26.3967995	30.51952823	34.55226383	32.28463748	32.21580232	32.21580232	30.25802946	21.51735722	5.650932512	15.82426141
14:43:42.053	0.068280208	0.068280208	1.698863651	3.570727126	10.60835354	10.60835354	13.9636527	17.50985432	26.40371883	30.52748214	34.56115187	32.29304739	32.22422373	32.22422373	30.26525945	21.52193485	5.652917832	15.82757853
14:43:43.032	0.068327466	0.068327466	1.69959958	3.572005597	10.61112832	10.61112832	13.96730894	17.51444446	26.41063861	30.53543645	34.5700402	32.30145752	32.23264535	32.23264535	30.27248943	21.52651241	5.65490334	15.8308956
14:43:44.007	0.06837456	0.06837456	1.700332671	3.573279057	10.61389204	10.61389204	13.97095056	17.51901621	26.41753065	30.54335875	34.57889259	32.30983358	32.24103283	32.24103283	30.27968992	21.53107124	5.656880941	15.83419911
14:43:44.980	0.068421584	0.068421584	1.701064411	3.574550087	10.61665031	10.61665031	13.97458494	17.52357885	26.42440891	30.5512651	34.58772699	32.31819257	32.2494032	32.2494032	30.28687554	21.53562059	5.658854645	15.83749576
14:43:45.958	0.068468878	0.068468878	1.701800082	3.575827861	10.61942303	10.61942303	13.97823831	17.52816532	26.43132305	30.55921258	34.59660718	32.32659482	32.25781686	32.25781686	30.29409814	21.5401933	5.660838698	15.84080934
14:43:46.929	0.068515862	0.068515862	1.702530645	3.57709668	10.62217615	10.62217615	13.98186579	17.53271925	26.43818811	30.56710352	34.60542403	32.3349371	32.26617044	32.26617044	30.30126899	21.54473319	5.662808723	15.84409915
14:43:47.909	0.06856331	0.06856331	1.703268143	3.57837746	10.62495503	10.62495503	13.98552718	17.53731573	26.44511727	30.57506802	34.61432291	32.34335692	32.27460166	32.27460166	30.30850631	21.54931509	5.664797196	15.8474194
14:43:48.895	0.068611076	0.068611076	1.704010319	3.57966628	10.62775118	10.62775118	13.98921125	17.54194066	26.45208929	30.58308166	34.62327654	32.35182849	32.28308467	32.28308467	30.31578789	21.55392496	5.666798025	15.85075993
14:43:49.854	0.068657562	0.068657562	1.704732339	3.580920017	10.63047104	10.63047104	13.99279475	17.54643932	26.45887092	30.59087636	34.63198536	32.36006838	32.29133567	32.29133567	30.32287016	21.55840858	5.668744268	15.85400898
14:43:50.834	0.068705094	0.068705094	1.705470325	3.582201394	10.63325068	10.63325068	13.99645697	17.55103677	26.46580144	30.59884207	34.6408851	32.36848885	32.29976746	32.29976746	30.33010742	21.56299027	5.670733295	15.85732911
14:43:51.819	0.068752896	0.068752896	1.706212233	3.583489498	10.63604474	10.63604474	14.00013812	17.55565796	26.47276772	30.60684875	34.64983044	32.37695242	32.30824239	32.30824239	30.33738153	21.56759522	5.672732639	15.8606661
14:43:52.790	0.068800048	0.068800048	1.706943768	3.584759509	10.63879936	10.63879936	14.00376727	17.56021386	26.47963553	30.61474215	34.65864905	32.38529602	32.31659718	32.31659718	30.34455234	21.57213472	5.674703776	15.86395567
14:43:53.760	0.068847178	0.068847178	1.707674699	3.586028391	10.64155137	10.64155137	14.00739291	17.56476532	26.48649661	30.62262771	34.66745874	32.39363113	32.32494343	32.32494343	30.35171565	21.57666942	5.676673038	15.86724176
14:43:54.745	0.068895065	0.068895065	1.7084171	3.587317101	10.6443462	10.6443462	14.01107491	17.56938752	26.49346429	30.63063565	34.676405	32.40209539	32.33341899	32.33341899	30.35898976	21.5812742	5.678672949	15.87057864
14:43:55.726	0.068942786	0.068942786	1.70915664	3.588600762	10.64712989	10.64712989	14.0147422	17.57399122	26.50040405	30.63861139	34.6853151	32.4105254	32.34186023	32.34186023	30.36623423	21.58586015	5.6806649	15.8739019
14:43:56.703	0.06899034	0.06899034	1.709893331	3.589879394	10.64990251	10.64990251	14.01839483	17.57857649	26.507316	30.64655505	34.69418921	32.41892129	32.35026728	32.35026728	30.37344918	21.59042736	5.682648923	15.87721157
14:43:57.673	0.069037582	0.069037582	1.710624903	3.591149059	10.6526555	10.6526555	14.02202155	17.58312923	26.51417887	30.65444218	34.703	32.42725723	32.35861429	32.35861429	30.38061242	21.59496178	5.68461891	15.8804975
14:43:58.648	0.069085094	0.069085094	1.7113604	3.592425457	10.65542292	10.65542292	14.02566722	17.58770573	26.52107752	30.66237032	34.71185644	32.43563629	32.36700445	32.36700445	30.38781252	21.59951948	5.686599221	15.8838003
14:43:59.628	0.069132878	0.069132878	1.712099829	3.593708594	10.65820477	10.65820477	14.02933185	17.592306	26.52801197	30.67033949	34.72075855	32.44405851	32.37543781	32.37543781	30.39504951	21.60410046	5.688589864	15.88711998
14:45:15.343	0.072910418	0.072910418	1.769724658	3.693462127	10.87395016	10.87395016	14.31335652	17.94878253	27.06527001	31.28741132	35.40958191	33.09558957	33.0277737	33.0277737	30.95431106	21.9579555	5.842973082	16.14357868
14:45:16.333	0.072960946	0.072960946	1.770484783	3.694774879	10.87678277	10.87678277	14.31708305	17.95345886	27.07231672	31.29550033	35.41860524	33.10412237	33.03631637	33.03631637	30.96162806	21.96258327	5.844999919	16.14693318
14:45:17.303	0.073010482	0.073010482	1.771229722	3.696061328	10.87955847	10.87955847	14.32073464	17.95804112	27.07922165	31.30342648	35.42744676	33.11248318	33.04468684	33.04468684	30.9687974	21.9671176	5.846986025	16.15021995
14:45:18.275	0.073060149	0.073060149	1.77197636	3.697350636	10.88234017	10.88234017	14.32439406	17.9626332	27.08614134	31.31136946	35.43630689	33.12086155	33.05307486	33.05307486	30.97598161	21.97166129	5.848976423	16.15351353
14:45:19.244	0.07310969	0.07310969	1.77272085	3.698636158	10.88511354	10.88511354	14.32804246	17.96721143	27.09304014	31.31928834	35.44513999	33.12921431	33.06143723	33.06143723	30.98314368	21.97619094	5.850960858	16.15679694
14:45:20.235	0.073160386	0.073160386	1.773482421	3.699951096	10.88795021	10.88795021	14.33177407	17.97189404	27.10009619	31.32738762	35.45417416	33.13775716	33.06998989	33.06998989	30.99046856	21.98082351	5.852990577	16.16015496
14:45:21.203	0.073209933	0.073209933	1.774226477	3.701235717	10.89072131	10.89072131	14.33541936	17.97646832	27.10698898	31.33529938	35.46299901	33.14610201	33.07834431	33.07834431	30.99762349	21.98534855	5.854973378	16.16343505
14:45:22.189	0.073260431	0.073260431	1.77498453	3.702544427	10.89354422	10.89354422	14.33913273	17.981128	27.11401042	31.3433587	35.4719883	33.15460231	33.08685434	33.08685434	31.00491153	21.98995772	5.856993239	16.16677614
14:45:23.159	0.073310138	0.073310138	1.77573045	3.703832113	10.89632161	10.89632161	14.34278616	17.98571246	27.12091848	31.35128777	35.48083215	33.16296504	33.09522661	33.09522661	31.01208142	21.99449214	5.85898053	16.17006305
14:45:24.135	0.07336018	0.07336018	1.776481139	3.705127956	10.89911643	10.89911643	14.34646246	17.99032559	27.1278697	31.35926627	35.48973099	33.1713797	33.10365087	33.10365087	31.01929568	21.99905456	5.860980287	16.17337028
14:45:25.104	0.073409892	0.073409892	1.777226613	3.70641472	10.90189151	10.90189151	14.35011273	17.99490603	27.13477165	31.3671881	35.49856646	33.1797344	33.11201508	33.11201508	31.02645834	22.0035843	5.862965913	16.17665383
14:45:26.094	0.073460711	0.073460711	1.777988412	3.707729586	10.90472703	10.90472703	14.35384243	17.99958613	27.14182372	31.37528213	35.50759384	33.18827051	33.12056089	33.12056089	31.03377634	22.00821225	5.864994781	16.18000857
14:45:27.061	0.073510377	0.073510377	1.778732667	3.709014094	10.90749692	10.90749692	14.35748574	18.0041578	27.14871239	31.3831885	35.51641176	33.19660852	33.12890835	33.12890835	31.04092433	22.01273262	5.866976684	16.18328535
14:45:28.046	0.073560996	0.073560996	1.779490941	3.710322721	10.91031865	10.91031865	14.36119718	18.00881494	27.15572982	31.39124253	35.52539422	33.20510205	33.13741149	33.13741149	31.04820547	22.01733716	5.868995679	16.18662315
14:45:29.024	0.073611285	0.073611285	1.780243986	3.711622246	10.9131206	10.9131206	14.36488253	18.01343931	27.16269783	31.39923974	35.53431315	33.21353547	33.14585443	33.14585443	31.05543489	22.02190894	5.871000507	16.18993722
14:45:29.999	0.073661447	0.073661447	1.780994883	3.712917986	10.91591422	10.91591422	14.36855687	18.01804985	27.16964496	31.40721288	35.54320508	33.22194329	33.15427174	33.15427174	31.0626422	22.0264667	5.872999375	16.19324114
14:45:30.970	0.073711432	0.073711432	1.78174286	3.714208613	10.91869665	10.91869665	14.37221643	18.02264182	27.17656409	31.41515377	35.55206089	33.23031692	33.16265479	33.16265479	31.06982002	22.03100575	5.874990234	16.1965315
14:45:31.947	0.073761755	0.073761755	1.782495623	3.71550742	10.92149655	10.92149655	14.3758989	18.02726253	27.18352649	31.42314419	35.5609718	33.23874259	33.17108992	33.17108992	31.07704226	22.03557286	5.87699359	16.19984222
14:45:32.922	0.073812003	0.073812003	1.783247002	3.716803765	10.92429099	10.92429099	14.37957412	18.03187411	27.19047509	31.43111868	35.56986478	33.24715126	33.17950801	33.17950801	31.08424976	22.04013058	5.878993025	16.20314615
14:45:33.909	0.073862898	0.073862898	1.784007785	3.718116253	10.92712005	10.92712005	14.38329482	18.03654274	27.19750963	31.43919167	35.57886745	33.2556636	33.18802987	33.18802987	31.09154593	22.04474434	5.881017236	16.20649071
14:45:34.877	0.073912842	0.073912842	1.784754098	3.719403705	10.92989499	10.92989499	14.38694427	18.04112194	27.20440938	31.44710988	35.58769736	33.26401253	33.19638813	33.19638813	31.09870186	22.04926938	5.883002711	16.20977096
14:45:35.859	0.073963537	0.073963537	1.785511354	3.720709955	10.93271028	10.93271028	14.39064673	18.04576763	27.21140929	31.45514291	35.59665516	33.27248234	33.20486737	33.20486737	31.10596122	22.05385976	5.885017055	16.21309859
14:45:36.830	0.074013692	0.074013692	1.786260284	3.722001766	10.93549429	10.93549429	14.39430798	18.0503616	27.21833123	31.46308636	35.60551292	33.2808575	33.21325184	33.21325184	31.11313927	22.05839869	5.887009011	16.21638894
14:45:37.815	0.074064599	0.074064599	1.787020177	3.723312409	10.93831872	10.93831872	14.39802233	18.05502217	27.22535348	31.47114481	35.61449875	33.28935371	33.22175748	33.22175748	31.1204209	22.06300306	5.889029883	16.21972673
14:45:38.786	0.074114811	0.074114811	1.787769424	3.724604614	10.94110325	10.94110325	14.40168415	18.0596168	27.23227636	31.4790891	35.62335715	33.29772936	33.23014241	33.23014241	31.12759903	22.06754194	5.891022203	16.22301707
14:45:39.758	0.074165103	0.074165103	1.788519599	3.725898345	10.9438909	10.9438909	14.40535001	18.06421648	27.23920681	31.48704198	35.63222496	33.30611388	33.2385362	33.2385362	31.13478458	22.07208546	5.893016754	16.22631078
14:45:40.742	0.074216045	0.074216045	1.789279198	3.727208248	10.94671324	10.94671324	14.40906142	18.06887329	27.2462233	31.49509348	35.6412026	33.31460218	33.24703386	33.24703386	31.14205888	22.07668506	5.895036115	16.22964515
14:45:41.708	0.074266082	0.074266082	1.790025051	3.728494372	10.94948418	10.94948418	14.41270518	18.0734452	27.25311183	31.50299804	35.65001623	33.32293536	33.25537621	33.25537621	31.14920008	22.08120044	5.897018696	16.23291848
14:45:42.695	0.074317237	0.074317237	1.790787287	3.729808668	10.95231565	10.95231565	14.41642847	18.07811688	27.26015066	31.51107494	35.65902187	33.33145004	33.26390024	33.26390024	31.15649663	22.08581401	5.899044581	16.236263
14:45:43.669	0.074367745	0.074367745	1.79153963	3.731105829	10.95511004	10.95511004	14.42010294	18.08272728	27.26709712	31.51904575	35.66790906	33.33985267	33.27231209	33.27231209	31.16369699	22.09036671	5.901043931	16.23956341
14:45:44.649	0.074418594	0.074418594	1.79229677	3.732411183	10.95792192	10.95792192	14.42380034	18.08736642	27.27408685	31.5270661	35.67685135	33.34830734	33.280776	33.280776	31.17094176	22.09494744	5.903055786	16.24288415
14:45:45.621	0.074469056	0.074469056	1.793047883	3.733706069	10.96071108	10.96071108	14.42746782	18.091968	27.28101995	31.53502135	35.68572089	33.35669318	33.289171	33.289171	31.17812737	22.09949072	5.905051387	16.24617775
14:45:46.598	0.074519805	0.074519805	1.793803017	3.73500781	10.96351484	10.96351484	14.43115443	18.09659356	27.28798915	31.54301792	35.69463635	33.36512239	33.29760939	33.29760939	31.18534997	22.10405734	5.907057428	16.24948827
14:45:47.582	0.074570947	0.074570947	1.794563715	3.736319066	10.96633893	10.96633893	14.43486771	18.10125256	27.29500869	31.55107213	35.70361593	33.37361216	33.30610839	33.30610839	31.19262428	22.1086566	5.909078009	16.25282248
14:45:48.551	0.074621337	0.074621337	1.795312968	3.737610516	10.96912021	10.96912021	14.43852462	18.10584081	27.30192161	31.5590039	35.71245885	33.38197267	33.31447796	33.31447796	31.19978766	22.11318568	5.911067947	16.25610582
14:45:49.525	0.074672016	0.074672016	1.796066248	3.738908831	10.9719161	10.9719161	14.4422007	18.11045309	27.30887068	31.56697705	35.72134774	33.3903766	33.32289099	33.32289099	31.20698806	22.11773812	5.913068341	16.2594061
14:45:50.512	0.0747234	0.0747234	1.796829734	3.740224658	10.97474954	10.97474954	14.44592608	18.1151272	27.31591289	31.57505693	35.73035547	33.39889283	33.33141642	33.33141642	31.21428451	22.12235123	5.915095593	16.26275038
14:45:51.477	0.074773666	0.074773666	1.797576356	3.741511344	10.97752006	10.97752006	14.44956868	18.11969743	27.32279854	31.58295708	35.73916269	33.40721944	33.339752	33.339752	31.22141832	22.12686147	5.917077827	16.26602009
14:45:52.462	0.074825003	0.074825003	1.798338603	3.74282488	10.98034823	10.98034823	14.45328701	18.12436265	27.32982728	31.5910213	35.74815265	33.41571876	33.34826046	33.34826046	31.22869993	22.1314651	5.919101302	16.26935751
14:45:53.439	0.074875951	0.074875951	1.799094817	3.744127943	10.98315369	10.98315369	14.45697542	18.12899031	27.33679938	31.59902042	35.75706989	33.42414928	33.35670002	33.35670002	31.23592241	22.1360313	5.921108519	16.27266781
14:45:54.414	0.074926823	0.074926823	1.799849632	3.745428518	10.98595363	10.98595363	14.4606565	18.13360875	27.34375757	31.60700347	35.76596907	33.43256267	33.36512242	33.36512242	31.24313003	22.14058806	5.923111781	16.27597128
14:45:55.377	0.074977097	0.074977097	1.800595313	3.746713277	10.98871935	10.98871935	14.46429256	18.13817067	27.35063056	31.61488867	35.77475901	33.44087274	33.37344136	33.37344136	31.25024897	22.1450887	5.925090562	16.27923407
14:45:56.364	0.075028652	0.075028652	1.801359725	3.748030233	10.99155423	10.99155423	14.46801945	18.14284654	27.35767519	31.62297067	35.78376818	33.44939002	33.38196771	33.38196771	31.25754525	22.14970141	5.927118808	16.28257812
14:45:57.337	0.075079505	0.075079505	1.802113448	3.749328695	10.99434912	10.99434912	14.47169372	18.14745637	27.3646203	31.63093837	35.7926498	33.45778665	33.39037327	33.39037327	31.26473799	22.15424861	5.929118448	16.28587469
14:45:58.325	0.075131169	0.075131169	1.802878938	3.75064735	10.99718732	10.99718732	14.47542486	18.15213752	27.37167281	31.63902919	35.80166849	33.46631282	33.39890849	33.39890849	31.27204153	22.15886581	5.931149062	16.28922201
14:45:59.297	0.075182026	0.075182026	1.803632188	3.751944844	10.9999798	10.9999798	14.47909585	18.15674317	27.37861154	31.64698937	35.81054142	33.47470113	33.40730567	33.40730567	31.27922679	22.16340818	5.933146966	16.2925151
14:46:00.273	0.075233119	0.075233119	1.804388687	3.753247856	11.00278399	11.00278399	14.48278216	18.16136804	27.38557918	31.6549826	35.81945103	33.48312408	33.41573752	33.41573752	31.28644155	22.16796916	5.935153242	16.29582168
14:47:15.385	0.07925175	0.07925175	1.863072402	3.854092142	11.21931043	11.21931043	14.76724664	18.51818139	27.92301402	32.27119859	36.50586356	34.13188129	34.06511143	34.06511143	31.84162345	22.51878265	6.09005204	16.55017765
14:47:16.362	0.079305173	0.079305173	1.863841945	3.855411503	11.22213676	11.22213676	14.77095757	18.52283507	27.93002161	32.27922922	36.51480323	34.1403284	34.07356559	34.07356559	31.84884556	22.52334407	6.092073717	16.55348517
14:47:17.341	0.079358735	0.079358735	1.864613224	3.85673376	11.22496912	11.22496912	14.77467638	18.52749858	27.93704396	32.28727667	36.52376147	34.148793	34.08203723	34.08203723	31.85608246	22.52791477	6.094099704	16.55679942
14:47:18.316	0.079412109	0.079412109	1.86538152	3.858050825	11.22779019	11.22779019	14.77838031	18.53214342	27.94403813	32.29529171	36.53268349	34.15722332	34.09047455	34.09047455	31.86328989	22.5324668	6.096117611	16.56010014
14:47:19.292	0.079465568	0.079465568	1.866150766	3.859369442	11.23061441	11.23061441	14.78208832	18.53679335	27.95103992	32.30331539	36.54161497	34.16566252	34.09892072	34.09892072	31.87050474	22.53702346	6.098137767	16.56340422
14:47:20.262	0.079518729	0.079518729	1.866915448	3.860680155	11.23342154	11.23342154	14.78577384	18.54141504	27.95799914	32.31129017	36.55049188	34.1740501	34.10731521	34.10731521	31.8776753	22.54155209	6.100145691	16.56668799
14:47:21.248	0.079572797	0.079572797	1.867692915	3.862012705	11.23627527	11.23627527	14.78952049	18.54611335	27.96507368	32.319397	36.55951563	34.18257637	34.11584846	34.11584846	31.88496426	22.54615543	6.102186941	16.57002593
14:47:22.212	0.079625688	0.079625688	1.868453195	3.863315718	11.23906558	11.23906558	14.79318381	18.55070715	27.97199079	32.32732333	36.56833832	34.19091262	34.12419151	34.12419151	31.8920906	22.55065602	6.104182818	16.57328937
14:47:23.198	0.079679817	0.079679817	1.869230992	3.864648675	11.24191984	11.24191984	14.79693104	18.55540614	27.97906625	32.335431	36.57736271	34.19943938	34.13272521	34.13272521	31.89937964	22.5552593	6.106224435	16.57662728
14:47:24.177	0.079733593	0.079733593	1.870003436	3.865972377	11.24475412	11.24475412	14.80065199	18.56007214	27.98609197	32.34348157	36.58632339	34.20790588	34.14119857	34.14119857	31.90661701	22.55982988	6.10825175	16.57994149
14:47:25.153	0.079787235	0.079787235	1.870773681	3.867292234	11.24757999	11.24757999	14.80436185	18.5647242	27.99309666	32.35150793	36.59525699	34.21634675	34.14964624	34.14964624	31.9138323	22.56438646	6.11027305	16.58324554
14:47:26.122	0.079840522	0.079840522	1.871538567	3.868602831	11.25038587	11.25038587	14.8080454	18.56934325	28.00005159	32.35947718	36.60412687	34.22472735	34.15803358	34.15803358	31.9209959	22.56891035	6.112280041	16.5865259
14:47:27.106	0.079894664	0.079894664	1.872315464	3.869933927	11.25323546	11.25323546	14.8117863	18.57403418	28.00711469	32.36757027	36.61313443	34.23323799	34.16655102	34.16655102	31.9282705	22.57350427	6.114318299	16.58985704
14:47:28.076	0.079948067	0.079948067	1.873081472	3.871246289	11.25604479	11.25604479	14.81547428	18.57865871	28.01407777	32.37554864	36.62201418	34.2416278	34.17494752	34.17494752	31.93544165	22.5780328	6.116327743	16.59314077
14:47:29.047	0.080001555	0.080001555	1.873848434	3.872560207	11.25885727	11.25885727	14.81916635	18.58328836	28.02104849	32.38353567	36.63090341	34.25002652	34.1833529	34.1833529	31.94262026	22.58256598	6.118339443	16.59642788
14:47:30.035	0.08005601	0.08005601	1.874628995	3.873897343	11.26171929	11.26171929	14.82292339	18.58799943	28.02814177	32.39166302	36.63994867	34.2585726	34.19190573	34.19190573	31.94992464	22.58717853	6.120386565	16.59977255
14:47:31.013	0.080109945	0.080109945	1.875401822	3.875221151	11.26455261	11.26455261	14.82664271	18.59266317	28.03516373	32.39970854	36.64890271	34.26703243	34.20037222	34.20037222	31.95715515	22.59174437	6.122413153	16.60308335
14:47:31.983	0.08016347	0.08016347	1.876168499	3.876534347	11.26736305	11.26736305	14.83033194	18.59728916	28.04212878	32.40768876	36.65778393	34.27542342	34.20876978	34.20876978	31.96432665	22.59627289	6.124423371	16.60636709
14:47:32.952	0.080216969	0.080216969	1.876934544	3.877846381	11.27017083	11.27017083	14.83401763	18.60191068	28.04908706	32.41566112	36.66665626	34.28380594	34.21715884	34.21715884	31.97149076	22.60079667	6.126431685	16.60964741
14:47:33.938	0.080271438	0.080271438	1.877714207	3.87918166	11.27302819	11.27302819	14.83776835	18.60661371	28.05616801	32.4237739	36.67568472	34.29233592	34.22569544	34.22569544	31.97878072	22.60539988	6.128475452	16.61298532
14:47:34.920	0.080325717	0.080325717	1.878490871	3.880511725	11.27587422	11.27587422	14.84150414	18.61129799	28.06322067	32.43185418	36.68467686	34.30083152	34.23419761	34.23419761	31.98604114	22.60998436	6.130511109	16.61630966
14:47:35.887	0.080379198	0.080379198	1.879255846	3.881821692	11.27867708	11.27867708	14.84518322	18.61591112	28.07016615	32.43981157	36.69353209	34.30919772	34.24257025	34.24257025	31.99319081	22.61449885	6.132515881	16.61958325
14:47:36.873	0.080433761	0.080433761	1.880036017	3.883157603	11.28153528	11.28153528	14.84893488	18.62061523	28.07724856	32.44792572	36.70256164	34.31772855	34.25110762	34.25110762	32.000481	22.61910202	6.13456023	16.62292115
14:47:37.842	0.080487413	0.080487413	1.880802908	3.884470696	11.28434449	11.28434449	14.85262219	18.62523862	28.0842094	32.45590048	36.71143592	34.32611263	34.2594981	34.2594981	32.00764563	22.62362583	6.136569534	16.62620151
14:47:38.825	0.080541872	0.080541872	1.881581047	3.885802968	11.28719456	11.28719456	14.85636308	18.62992917	28.09127127	32.4639909	36.72043876	34.33461811	34.26801004	34.26801004	32.01491383	22.62821499	6.138608058	16.62952925
14:47:39.790	0.080595364	0.080595364	1.882345106	3.887111056	11.28999273	11.28999273	14.86003579	18.6345342	28.09820435	32.47193366	36.72927713	34.34296816	34.2763664	34.2763664	32.02204905	22.63272012	6.140609452	16.63279607
14:47:40.775	0.080649996	0.080649996	1.883125167	3.888446461	11.29284917	11.29284917	14.86378492	18.63923503	28.10528159	32.48004146	36.73829903	34.35149152	34.28489618	34.28489618	32.02933221	22.63731859	6.142652513	16.63613059
14:47:41.745	0.080703826	0.080703826	1.883893525	3.889761752	11.29566241	11.29566241	14.86747732	18.64386467	28.11225161	32.48802634	36.74718399	34.35988547	34.29329642	34.29329642	32.03650461	22.64184708	6.144664676	16.63941436
14:47:42.731	0.080758576	0.080758576	1.884674725	3.891098947	11.29852233	11.29852233	14.87123092	18.64857104	28.11933709	32.49614337	36.75621586	34.36841814	34.30183546	34.30183546	32.04379539	22.64645025	6.146710219	16.64275228
14:47:43.694	0.08081208	0.08081208	1.885437878	3.892405171	11.30131585	11.30131585	14.87489733	18.65316804	28.12625785	32.50407161	36.7650375	34.37675216	34.31017566	34.31017566	32.05091627	22.65094608	6.14870826	16.64601237
14:47:44.680	0.080866892	0.080866892	1.88621942	3.893742793	11.30417634	11.30417634	14.87865158	18.65787515	28.13334433	32.51218959	36.77407013	34.38528543	34.31871524	34.31871524	32.05820723	22.65554924	6.1507542	16.6493503
14:47:45.650	0.080920845	0.080920845	1.886988449	3.89505892	11.3069907	11.3069907	14.88234523	18.66250626	28.14031633	32.52017631	36.78295657	34.39368054	34.32711653	34.32711653	32.06537999	22.66007771	6.152767136	16.65263407
14:47:46.635	0.080975665	0.080975665	1.887769553	3.896395632	11.3098489	11.3098489	14.88609638	18.66720941	28.14739675	32.52828713	36.79198093	34.4022059	34.33564812	34.33564812	32.07266386	22.66467627	6.154811427	16.65596867
14:47:47.614	0.081030183	0.081030183	1.888546067	3.897724408	11.31268997	11.31268997	14.88982498	18.67188427	28.1544345	32.53634897	36.80095066	34.41067958	34.34412797	34.34412797	32.07990342	22.66924679	6.156843452	16.65928294
14:47:48.583	0.081084174	0.081084174	1.889314819	3.899039825	11.3155023	11.3155023	14.89351583	18.67651176	28.16140089	32.54432895	36.80982917	34.41906703	34.35252151	34.35252151	32.08706914	22.67377063	6.158854922	16.66256336
14:47:49.553	0.081138251	0.081138251	1.890084534	3.900356811	11.31831782	11.31831782	14.89721081	18.6811444	28.16837497	32.55231766	36.81871724	34.42746345	34.36092398	34.36092398	32.09424237	22.67829915	6.160868667	16.66584719
14:47:50.539	0.081193253	0.081193253	1.890867124	3.901695747	11.3211801	11.3211801	14.90096709	18.68585387	28.17546466	32.56043868	36.82775237	34.43599874	34.36946541	34.36946541	32.10153408	22.68290241	6.162915843	16.66918521
14:47:51.517	0.081247839	0.081247839	1.89164353	3.903024024	11.32401942	11.32401942	14.9046932	18.69052548	28.18249729	32.56849423	36.83671453	34.44446503	34.37793775	34.37793775	32.10876667	22.68746828	6.164946596	16.67249613
14:47:52.487	0.08130201	0.08130201	1.892413764	3.904341662	11.32683583	11.32683583	14.90838919	18.69515929	28.18947297	32.57648445	36.84560385	34.45286246	34.38634115	34.38634115	32.11594028	22.69199686	6.166960955	16.67578
14:47:53.472	0.08135705	0.08135705	1.893196076	3.905679883	11.32969606	11.32969606	14.91214264	18.69986511	28.19655699	32.58459867	36.85463098	34.46139002	34.39487474	34.39487474	32.12322489	22.69659545	6.169006653	16.67911464
14:47:54.442	0.081411283	0.081411283	1.893966653	3.906997951	11.33251305	11.33251305	14.9158393	18.70449969	28.20353372	32.59258988	36.86352111	34.46978811	34.40327873	34.40327873	32.13039874	22.70112405	6.171021417	16.68239855
14:47:55.421	0.081466051	0.081466051	1.894744551	3.908328462	11.33535647	11.33535647	14.91957057	18.70917765	28.21057568	32.60065571	36.87249412	34.47826442	34.41176098	34.41176098	32.13763925	22.70569467	6.173055072	16.68571292
14:47:56.391	0.081520347	0.081520347	1.895515471	3.90964696	11.33817404	11.33817404	14.92326789	18.713813	28.21755345	32.60864791	36.88138507	34.48666316	34.42016557	34.42016557	32.14481333	22.7102233	6.17507024	16.68899685
14:47:57.376	0.081575513	0.081575513	1.896298483	3.910986059	11.34103546	11.34103546	14.92702271	18.7185204	28.22463961	32.61676416	36.89041388	34.49519206	34.42870039	34.42870039	32.15209844	22.71482195	6.177116764	16.69233155
14:47:58.346	0.081629872	0.081629872	1.89706975	3.912304993	11.34385363	11.34385363	14.9307207	18.72315654	28.23161845	32.62475738	36.89930568	34.50359149	34.43710561	34.43710561	32.15927279	22.71935063	6.179132344	16.69561552
14:47:59.324	0.081684709	0.081684709	1.897847547	3.913635015	11.34669532	11.34669532	14.93444951	18.72783127	28.23865533	32.63281698	36.90827117	34.51206047	34.44558039	34.44558039	32.16650639	22.72391664	6.181164739	16.69892656
14:48:00.310	0.081740028	0.081740028	1.898631891	3.914976151	11.34956058	11.34956058	14.93820921	18.7325447	28.24575038	32.6409431	36.91731052	34.52059916	34.45412491	34.45412491	32.17379937	22.72852006	6.18321399	16.70226474
14:49:15.818	0.086071414	0.086071414	1.959204095	4.018305144	11.5697968	11.5697968	15.22705059	19.09455276	28.79048478	33.26453054	37.61054568	35.17525702	35.10913015	35.10913015	32.73247107	23.08096212	6.340708135	16.95784383
14:49:16.790	0.086128393	0.086128393	1.959990135	4.019642909	11.5726414	11.5726414	15.23077952	19.09922487	28.79751253	33.27257168	37.61947943	35.18369125	35.11756749	35.11756749	32.73966265	23.0854963	6.342742083	16.96113188
14:49:17.775	0.086186165	0.086186165	1.960786849	4.020998759	11.57552428	11.57552428	15.2345586	19.10395976	28.80463465	33.28072069	37.62853288	35.19223842	35.12611778	35.12611778	32.74695038	23.09009104	6.344803396	16.96446384
14:49:18.741	0.086242855	0.086242855	1.961568364	4.022328664	11.57835182	11.57835182	15.2382651	19.10860368	28.81161984	33.28871295	37.63741204	35.20062098	35.13450337	35.13450337	32.7540976	23.09459712	6.346825135	16.9677315
14:49:19.718	0.086300222	0.086300222	1.962358928	4.023673889	11.58121176	11.58121176	15.24201402	19.11330071	28.81868487	33.29679644	37.64639243	35.20909905	35.14298446	35.14298446	32.76132611	23.09915437	6.348870033	16.97103628
14:49:20.698	0.086357797	0.086357797	1.963152092	4.025023454	11.58408075	11.58408075	15.24577477	19.11801253	28.82577205	33.30490519	37.65540073	35.21760341	35.1514918	35.1514918	32.76857687	23.10372559	6.350921398	16.97435118
14:49:21.672	0.086415051	0.086415051	1.963940564	4.026364957	11.58693244	11.58693244	15.24951278	19.12269581	28.83281626	33.31296467	37.66435415	35.22605589	35.15994723	35.15994723	32.77578327	23.10826876	6.352960377	16.97764574
14:49:22.660	0.086473161	0.086473161	1.964740533	4.02772594	11.58982535	11.58982535	15.2533048	19.12744673	28.8399621	33.32114033	37.67343651	35.23463004	35.16852431	35.16852431	32.78309323	23.11287715	6.35502883	16.98098759
14:49:23.630	0.086530243	0.086530243	1.965526086	4.029062317	11.59266579	11.59266579	15.25702799	19.13211137	28.84697811	33.32916735	37.6823536	35.2430481	35.17694523	35.17694523	32.79026997	23.11740148	6.357059756	16.98426849
14:49:24.603	0.086587534	0.086587534	1.966314237	4.030403034	11.59551528	11.59551528	15.260763	19.13679078	28.85401628	33.33721961	37.69129861	35.25149245	35.1853924	35.1853924	32.79746898	23.12193978	6.359097148	16.98755951
14:49:25.580	0.086645093	0.086645093	1.967105792	4.03174946	11.59837674	11.59837674	15.26451365	19.14148975	28.86108377	33.34530534	37.70028064	35.2599717	35.19387444	35.19387444	32.80469758	23.12649666	6.361143084	16.99086401
14:49:26.557	0.086702683	0.086702683	1.967897504	4.033096074	11.60123841	11.60123841	15.26826456	19.146189	28.86815161	33.35339136	37.70926286	35.26845106	35.20235656	35.20235656	32.81192614	23.13105344	6.363189175	16.99416843
14:49:27.543	0.086760836	0.086760836	1.968696686	4.03445531	11.60412674	11.60412674	15.27205035	19.15093191	28.87528505	33.36155234	37.7183282	35.27700882	35.21091707	35.21091707	32.81922137	23.13565218	6.365254311	16.99750328
14:49:28.506	0.086817665	0.086817665	1.969477382	4.035783028	11.60694792	11.60694792	15.27574808	19.15556447	28.88225245	33.36952326	37.72718229	35.2853671	35.21927799	35.21927799	32.82634641	23.14014356	6.367271432	17.00076027
14:49:29.496	0.086876119	0.086876119	1.970280135	4.037148175	11.60984845	11.60984845	15.27954978	19.16032724	28.88941561	33.37771803	37.73628489	35.29395991	35.22787348	35.22787348	32.83367122	23.1447608	6.369345281	17.00410853
14:49:30.465	0.086933365	0.086933365	1.971066029	4.038484572	11.61268773	11.61268773	15.28327116	19.16498934	28.89642727	33.3857394	37.74519474	35.3023707	35.23628686	35.23628686	32.84084072	23.14928006	6.371375326	17.00738574
14:49:31.434	0.086990643	0.086990643	1.971852083	4.039821163	11.61552725	11.61552725	15.2869928	19.16965174	28.90343933	33.39376112	37.75410484	35.31078167	35.24470037	35.24470037	32.84801023	23.15379926	6.373405536	17.0106629
14:49:32.414	0.087048603	0.087048603	1.972647227	4.041173129	11.61839925	11.61839925	15.29075699	19.17436739	28.9105314	33.40187427	37.76311637	35.31928832	35.25320956	35.25320956	32.85526114	23.1583697	6.375458968	17.01397721
14:49:33.389	0.0871063	0.0871063	1.973438481	4.0425184	11.62125686	11.62125686	15.29450227	19.17905932	28.91758772	33.40994642	37.77208222	35.32775178	35.26167551	35.26167551	32.8624751	23.16291676	6.377502101	17.01727458
14:49:34.376	0.08716474	0.08716474	1.974239641	4.043880431	11.6241499	11.6241499	15.29829393	19.18380932	28.92473129	33.4181183	37.78115868	35.3363196	35.2702458	35.2702458	32.86977785	23.16751973	6.379570554	17.02061247
14:49:35.356	0.087222798	0.087222798	1.97503529	4.045233013	11.62702269	11.62702269	15.30205902	19.18852598	28.93182465	33.42623263	37.7901711	35.3448269	35.27875552	35.27875552	32.87702887	23.17209001	6.381624523	17.02392667
14:49:36.325	0.087280236	0.087280236	1.975822174	4.046570612	11.62986348	11.62986348	15.30578213	19.19319003	28.9388388	33.43425626	37.79908264	35.35323891	35.28716989	35.28716989	32.88419852	23.17660893	6.383655611	17.02720362
14:49:37.297	0.087337885	0.087337885	1.976611659	4.047912556	11.63271333	11.63271333	15.30951707	19.19786884	28.9458751	33.44230512	37.80802207	35.36167719	35.29561049	35.29561049	32.89139042	23.1811418	6.385693165	17.03049068
14:49:38.272	0.087395743	0.087395743	1.977403746	4.04925884	11.63557223	11.63557223	15.31326383	19.20256242	28.95293352	33.4503792	37.81698936	35.3701417	35.3040773	35.3040773	32.89860452	23.1856886	6.387737179	17.03378784
14:49:39.257	0.087454227	0.087454227	1.978204129	4.050619144	11.63846072	11.63846072	15.31704933	19.2073045	28.96006479	33.4585365	37.82604895	35.37869327	35.31263115	35.31263115	32.90589268	23.19028199	6.389802345	17.03711878
14:49:40.229	0.087511972	0.087511972	1.978994117	4.051961701	11.64131135	11.64131135	15.32078517	19.21198433	28.96710239	33.46658656	37.83498929	35.38713221	35.3210723	35.3210723	32.91308469	23.19481472	6.391840436	17.04040574
14:49:41.204	0.087569928	0.087569928	1.979786709	4.0533086	11.64417103	11.64417103	15.32453283	19.21667892	28.97416211	33.47466183	37.84395749	35.3955974	35.32953966	35.32953966	32.92029893	23.19936137	6.39388499	17.04370278
14:49:42.191	0.08762863	0.08762863	1.980589228	4.05467229	11.64706617	11.64706617	15.32832693	19.22143165	28.98130917	33.4828369	37.8530364	35.40416701	35.33811145	35.33811145	32.92760201	23.20396395	6.395954895	17.04704038
14:49:43.166	0.08768665	0.08768665	1.981382158	4.056019604	11.64992639	11.64992639	15.3320752	19.22612694	28.98836978	33.49091299	37.86200523	35.41263266	35.3465792	35.3465792	32.93481634	23.20851052	6.397999814	17.05033736
14:49:44.134	0.087744287	0.087744287	1.982169564	4.057357452	11.65276633	11.65276633	15.33579687	19.23078886	28.99538013	33.4989315	37.87090999	35.42103777	35.35498635	35.35498635	32.94197894	23.21302441	6.400030234	17.05361064
14:49:45.110	0.087802432	0.087802432	1.982963646	4.058706563	11.65563	11.65563	15.3395496	19.23548965	29.00244887	33.50701669	37.87988867	35.42951258	35.36346319	35.36346319	32.94920079	23.21757557	6.402077617	17.05691094
14:49:46.091	0.087860908	0.087860908	1.983761971	4.060062801	11.65850863	11.65850863	15.3433219	19.2402149	29.0095543	33.51514376	37.8889137	35.43803109	35.37198369	35.37198369	32.95645972	23.22215002	6.404135683	17.06022814
14:49:47.050	0.087918104	0.087918104	1.984542552	4.061388815	11.66132294	11.66132294	15.34700985	19.24483448	29.01650075	33.52308889	37.89773657	35.44635872	35.38031323	35.38031323	32.96355586	23.22662181	6.406147755	17.06347088
14:49:48.051	0.08797784	0.08797784	1.985357501	4.06277313	11.66426081	11.66426081	15.35085969	19.24965678	29.02375196	33.53138249	37.90694626	35.45505139	35.38900786	35.38900786	32.9709629	23.23128945	6.408248157	17.06685564
14:49:49.027	0.088036116	0.088036116	1.986152268	4.06412308	11.66712557	11.66712557	15.35461368	19.25435899	29.03082251	33.53946937	37.91592626	35.46352719	35.39748553	35.39748553	32.978185	23.23584046	6.410296284	17.07015583
14:49:50.004	0.088094485	0.088094485	1.986948015	4.065474614	11.66999351	11.66999351	15.35837181	19.25906633	29.03790071	33.5475649	37.92491572	35.47201187	35.40597203	35.40597203	32.98541452	23.24039608	6.412346682	17.07345935
14:49:50.979	0.088152767	0.088152767	1.987742313	4.066823607	11.67285589	11.67285589	15.3621226	19.26376445	29.04496496	33.55564437	37.93388722	35.48047953	35.41444147	35.41444147	32.99262938	23.24494239	6.414393093	17.07675612
14:49:51.954	0.088211082	0.088211082	1.988536777	4.068172801	11.67571852	11.67571852	15.36587368	19.2684629	29.05202962	33.56372422	37.942859	35.48894739	35.42291108	35.42291108	32.99984427	23.24948864	6.416439678	17.08005284
14:49:52.920	0.088268891	0.088268891	1.989324073	4.069509743	11.67855499	11.67855499	15.36959043	19.2731183	29.05902948	33.57172987	37.95174825	35.49733729	35.43130267	35.43130267	33.0069926	23.25399287	6.418467546	17.0833191
14:49:53.909	0.08832811	0.08832811	1.990130294	4.07087874	11.68145928	11.68145928	15.37339603	19.27788494	29.06619653	33.57992662	37.96084956	35.50592727	35.43989434	35.43989434	33.01431125	23.25860435	6.420543902	17.08666311
14:49:54.882	0.088386404	0.088386404	1.990923647	4.072225805	11.68431688	11.68431688	15.37714039	19.28257485	29.07324811	33.58799122	37.969804	35.51437857	35.44834727	35.44834727	33.02151159	23.26314121	6.422586862	17.08995302
14:49:55.859	0.08844497	0.08844497	1.991720431	4.073578615	11.68718648	11.68718648	15.38090046	19.28728438	29.08032912	33.59608938	37.97879556	35.52286485	35.45683513	35.45683513	33.02874159	23.26769667	6.424638403	17.09325641
14:49:56.833	0.088503389	0.088503389	1.992514939	4.074927481	11.69004755	11.69004755	15.38464928	19.29197979	29.08738884	33.60416309	37.98775984	35.53132531	35.46529714	35.46529714	33.03594945	23.27223812	6.426683829	17.09654963
14:49:57.810	0.088562022	0.088562022	1.993312071	4.07628072	11.69291771	11.69291771	15.38841	19.29669006	29.0944708	33.61226215	37.99675213	35.53981214	35.47378548	35.47378548	33.04317963	23.27679354	6.428735755	17.09985299
14:49:58.792	0.088620987	0.088620987	1.994113453	4.077641092	11.69580283	11.69580283	15.39219027	19.30142477	29.10158943	33.62040305	38.00579074	35.54834262	35.48231743	35.48231743	33.05044684	23.28137223	6.430798363	17.10317322
14:49:59.757	0.088678965	0.088678965	1.99490113	4.07897812	11.69863827	11.69863827	15.3959054	19.30607787	29.10858528	33.62840343	38.01467319	35.55672567	35.49070189	35.49070189	33.05758832	23.28587162	6.432825447	17.10643593
14:50:00.746	0.088738419	0.088738419	1.995708588	4.080348644	11.70154456	11.70154456	15.39971334	19.31084715	29.11575573	33.6366034	38.0237771	35.56531765	35.49929527	35.49929527	33.06490763	23.29048298	6.434903179	17.10977984
14:51:15.840	0.093351752	0.093351752	2.057521933	4.185021822	11.92298321	11.92298321	15.68973762	19.6739631	29.66143943	34.26034825	38.71587509	36.21830254	36.15226106	36.15226106	33.62074183	23.64043892	6.593188168	17.36353514
14:51:16.819	0.093413186	0.093413186	2.058334182	4.186394094	11.92587941	11.92587941	15.69352939	19.67870879	29.66856793	34.26849276	38.72490682	36.22682132	36.16077796	36.16077796	33.62798767	23.64499788	6.595258059	17.3668407
14:51:17.778	0.093473398	0.093473398	2.05913	4.187738529	11.92871669	11.92871669	15.69724398	19.68335784	29.6755512	34.27647124	38.7337543	36.23516624	36.16912102	36.16912102	33.63508549	23.64946364	6.597285831	17.37007868
14:51:18.769	0.093535653	0.093535653	2.059952546	4.189128034	11.93164891	11.93164891	15.70108283	19.68816236	29.68276792	34.28471635	38.7428973	36.24378984	36.17774264	36.17774264	33.6424202	23.65407836	6.599381446	17.37342467
14:51:19.732	0.093596182	0.093596182	2.06075202	4.190478486	11.93449854	11.93449854	15.70481352	19.69283148	29.68978117	34.29272889	38.75178228	36.25217001	36.18612086	36.18612086	33.64954773	23.65856266	6.601418031	17.37667608
14:51:20.722	0.093658442	0.093658442	2.061574071	4.191866993	11.9374283	11.9374283	15.70864907	19.69763179	29.69699139	34.30096638	38.76091655	36.26078525	36.19473405	36.19473405	33.65687505	23.66317258	6.603511868	17.38001858
14:51:21.699	0.093719919	0.093719919	2.062385502	4.193237479	11.94031986	11.94031986	15.71243456	19.70236941	29.70410738	34.30909611	38.7699312	36.2692876	36.20323434	36.20323434	33.66410621	23.66772193	6.605578396	17.38331715
14:51:22.676	0.093781429	0.093781429	2.063197094	4.194608159	11.94321165	11.94321165	15.71622032	19.70710733	29.71122373	34.31722616	38.77894606	36.27779009	36.21173472	36.21173472	33.67133734	23.67227119	6.607645081	17.38661565
14:51:23.646	0.093842532	0.093842532	2.064003046	4.195969233	11.946083	11.946083	15.71997929	19.71181167	29.71828956	34.3252984	38.7878967	36.28623193	36.22017444	36.22017444	33.67851677	23.67678783	6.60969715	17.38989051
14:51:24.625	0.093904236	0.093904236	2.064816643	4.197343138	11.94898125	11.94898125	15.72377343	19.71655998	29.72542137	34.33344591	38.79693065	36.29475229	36.22869262	36.22869262	33.68576282	23.68134632	6.611768431	17.3931957
14:51:25.598	0.093965596	0.093965596	2.065625423	4.198708828	11.95186199	11.95186199	15.72754461	19.72127952	29.73250988	34.34154386	38.80590952	36.30322064	36.23715876	36.23715876	33.69296451	23.68587682	6.613827193	17.3964806
14:51:26.573	0.094027115	0.094027115	2.066436032	4.200077528	11.95474891	11.95474891	15.73132383	19.72600908	29.73961337	34.34965883	38.81490712	36.31170659	36.24564246	36.24564246	33.70018102	23.69041658	6.615890358	17.3997722
14:51:27.544	0.094088415	0.094088415	2.067243484	4.201440816	11.95762424	11.95762424	15.73508785	19.73071957	29.74668814	34.35774089	38.82386809	36.32015794	36.25409152	36.25409152	33.70736797	23.69493765	6.617945234	17.40305026
14:51:28.524	0.094150318	0.094150318	2.068058596	4.202816957	11.9605265	11.9605265	15.73888709	19.7354741	29.75382897	34.36589831	38.83291248	36.3286879	36.26261914	36.26261914	33.71462162	23.69950062	6.620019348	17.40635869
14:51:29.503	0.094212192	0.094212192	2.068873043	4.204191895	11.96342605	11.96342605	15.74268273	19.74022408	29.7609629	34.37404776	38.8419479	36.33720932	36.27113819	36.27113819	33.72186789	23.70405886	6.622091515	17.40966368
14:51:30.476	0.094273721	0.094273721	2.069682676	4.205558626	11.96630812	11.96630812	15.74645546	19.74494534	29.7680536	34.38214773	38.85092832	36.34567882	36.27960528	36.27960528	33.72906985	23.70858916	6.624151178	17.41294842
14:51:31.463	0.09433617	0.09433617	2.070504129	4.20694523	11.96923191	11.96923191	15.75028276	19.74973487	29.77524676	34.39036464	38.86003825	36.35427039	36.28819438	36.28819438	33.73637547	23.71318459	6.626240655	17.41628038
14:51:32.441	0.094398083	0.094398083	2.07131827	4.208319409	11.97212934	11.97212934	15.75407551	19.75448109	29.7823748	34.39850707	38.86906547	36.3627839	36.2967054	36.2967054	33.74361458	23.7177381	6.628311272	17.41958194
14:51:33.404	0.094459081	0.094459081	2.07212009	4.209672714	11.97498257	11.97498257	15.75781037	19.75915485	29.78939394	34.406525	38.87795453	36.37116705	36.30508605	36.30508605	33.7507427	23.72222172	6.630350305	17.42283282
14:51:34.390	0.094521569	0.094521569	2.07294123	4.211058546	11.97790422	11.97790422	15.76163474	19.76394057	29.79658114	34.41473481	38.88705617	36.37975062	36.31366704	36.31366704	33.75804109	23.72681238	6.632438213	17.42616131
14:51:35.359	0.094583015	0.094583015	2.073748395	4.212420714	11.98077579	11.98077579	15.76539353	19.76864418	29.80364497	34.4228036	38.89600133	36.38818655	36.32210039	36.32210039	33.76521381	23.73132391	6.634490334	17.42943243
14:51:36.344	0.09464551	0.09464551	2.074569061	4.213805584	11.98369505	11.98369505	15.7692147	19.77342582	29.81082588	34.43100603	38.90509451	36.39676201	36.33067319	36.33067319	33.77250503	23.7359099	6.636576522	17.43275753
14:51:37.312	0.09470696	0.09470696	2.075375734	4.215166763	11.9865642	11.9865642	15.77297024	19.77812527	29.8178833	34.4390673	38.91403107	36.40518971	36.33909824	36.33909824	33.77967048	23.7404167	6.638626887	17.43602522
14:51:38.297	0.094769524	0.094769524	2.076196749	4.216552061	11.98948401	11.98948401	15.77679204	19.78290762	29.82506512	34.44727058	38.92312491	36.41376567	36.34767146	36.34767146	33.78696183	23.74500263	6.640713448	17.43935026
14:51:39.272	0.094831488	0.094831488	2.077009612	4.217923524	11.99237449	11.99237449	15.78057542	19.78764182	29.83217458	34.45539109	38.93212687	36.42225491	36.35615795	36.35615795	33.79417933	23.74954202	6.642779036	17.44264157
14:51:40.254	0.094893931	0.094893931	2.077828481	4.21930504	11.99528598	11.99528598	15.78438625	19.79241035	29.8393355	34.46357029	38.94119375	36.43080531	36.36470555	36.36470555	33.80144868	23.75411395	6.64485963	17.44595647
14:51:41.220	0.094955391	0.094955391	2.078634189	4.220664273	11.99815033	11.99815033	15.78813535	19.79710159	29.84638029	34.47161674	38.95011333	36.43921675	36.37311419	36.37311419	33.80859974	23.75861142	6.646906533	17.44921738
14:51:42.195	0.095017458	0.095017458	2.079447574	4.222036378	12.00104164	12.00104164	15.79191969	19.80183688	29.85349114	34.47973857	38.95911633	36.44770679	36.38160137	36.38160137	33.81581749	23.76315075	6.648972687	17.45250863
14:51:43.171	0.095079623	0.095079623	2.08026197	4.223410108	12.0039362	12.0039362	15.79570825	19.80657741	29.86060979	34.48786918	38.96812893	36.45620582	36.39009751	36.39009751	33.82304275	23.76769473	6.651041155	17.45580326
14:51:44.151	0.095142078	0.095142078	2.081079886	4.224789696	12.00684292	12.00684292	15.79951269	19.81133777	29.86775813	34.49603363	38.9771789	36.46474003	36.39862877	36.39862877	33.83029776	23.77225734	6.653118307	17.4591114
14:51:45.131	0.095204568	0.095204568	2.081897981	4.226169506	12.00974994	12.00974994	15.80331747	19.81609851	29.87490698	34.50419855	38.98622925	36.47327454	36.40716029	36.40716029	33.83755289	23.77681996	6.655195659	17.46241953
14:51:46.105	0.09526671	0.09526671	2.08271124	4.227541079	12.01263943	12.01263943	15.80709928	19.82083046	29.88201252	34.5123139	38.99522452	36.48175704	36.41563978	36.41563978	33.84476367	23.78135461	6.657260476	17.46570739
14:51:47.093	0.09532978	0.09532978	2.083536375	4.228932601	12.01557077	12.01557077	15.81093581	19.82563084	29.88922074	34.52054643	39.00434954	36.49036183	36.42424149	36.42424149	33.85207826	23.78595447	6.659355188	17.46904252
14:51:48.058	0.095391417	0.095391417	2.084342483	4.230291955	12.01843417	12.01843417	15.81468339	19.83031989	29.8962617	34.52858783	39.01326256	36.49876665	36.43264326	36.43264326	33.85922274	23.79044727	6.661401343	17.47230004
14:51:49.044	0.09545443	0.09545443	2.085166307	4.231681105	12.02136016	12.02136016	15.81851284	19.83511133	29.90345634	34.53680466	39.02236989	36.50735463	36.44122809	36.44122809	33.86652276	23.79503782	6.663492214	17.47562842
14:51:50.005	0.095515881	0.095515881	2.085969427	4.233035263	12.02421228	12.02421228	15.82224557	19.83978171	29.91046913	34.54481369	39.03124677	36.51572524	36.4495956	36.4495956	33.87363787	23.79951202	6.665530286	17.47887244
14:51:50.986	0.095578645	0.095578645	2.08678944	4.234417828	12.02712405	12.02712405	15.82605633	19.84454968	29.91762838	34.55298989	39.04030879	36.52427038	36.45813753	36.45813753	33.8809012	23.80407935	6.667610976	17.48218397
14:51:51.961	0.09564106	0.09564106	2.087604617	4.235792158	12.0300183	12.0300183	15.82984412	19.84928887	29.92474435	34.56111657	39.04931578	36.53276357	36.46662748	36.46662748	33.88812022	23.80861874	6.669679139	17.48547526
14:51:52.937	0.095703574	0.095703574	2.088420815	4.237168129	12.03291584	12.03291584	15.83363617	19.85403335	29.93186817	34.56925212	39.05833247	36.54126583	36.47512649	36.47512649	33.89534683	23.81316282	6.671749638	17.48876995
14:51:53.922	0.0957667	0.0957667	2.089244723	4.238557018	12.0358404	12.0358404	15.83746355	19.85882199	29.93905822	34.5774632	39.06743274	36.54984684	36.48370416	36.48370416	33.90264022	23.81774883	6.673839439	17.49209503
14:51:54.902	0.095829541	0.095829541	2.090064625	4.239939073	12.0387504	12.0387504	15.84127183	19.86358668	29.94621225	34.58563305	39.07648715	36.55838456	36.49223853	36.49223853	33.90989667	23.82231153	6.675918822	17.49540321
14:51:55.877	0.095892097	0.095892097	2.090880541	4.241314329	12.04164591	12.04164591	15.8450611	19.86832756	29.95333045	34.59376187	39.08549597	36.56687921	36.50072981	36.50072981	33.91711639	23.82685107	6.677987841	17.49869459
14:51:56.858	0.095955074	0.095955074	2.091701653	4.242698265	12.04455951	12.04455951	15.84887402	19.87309798	29.96049291	34.60194115	39.09456057	36.57542641	36.50927357	36.50927357	33.92438061	23.83141851	6.680069782	17.50200621
14:51:57.827	0.096017315	0.096017315	2.092512908	4.244065507	12.0474378	12.0474378	15.85264068	19.87781048	29.96756835	34.61002095	39.10351478	36.58386945	36.5177132	36.5177132	33.93155618	23.83593014	6.682126478	17.50527736
14:51:58.814	0.096080748	0.096080748	2.093339415	4.245458374	12.05036986	12.05036986	15.85647766	19.88261092	29.97477575	34.61825135	39.11263574	36.59246966	36.52630989	36.52630989	33.93886519	23.84052559	6.684221585	17.50860928
14:51:59.785	0.096143188	0.096143188	2.094152716	4.246828907	12.05325473	12.05325473	15.86025284	19.887334	29.98186694	34.62634893	39.12160938	36.60093091	36.53476764	36.53476764	33.94605595	23.84504663	6.686282962	17.51188724
14:53:15.204	0.101098403	0.101098403	2.15784763	4.353924128	12.27815639	12.27815639	16.15443411	20.25525566	30.53404771	35.25659225	39.81961159	37.2588948	37.19235905	37.19235905	34.50480282	24.19613162	6.846953516	17.76644153
14:53:16.175	0.101163537	0.101163537	2.158674039	4.355310572	12.28106121	12.28106121	16.15823204	20.260004	30.54117149	35.26471915	39.82860671	37.26737165	37.20082991	37.20082991	34.51199601	24.20064873	6.849028289	17.76971673
14:53:17.153	0.101229175	0.101229175	2.159506557	4.356707189	12.28398718	12.28398718	16.16205756	20.26478681	30.5483469	35.27290486	39.83766676	37.27590965	37.20936184	37.20936184	34.51924094	24.20519826	6.85111815	17.77301544
14:53:18.128	0.101294645	0.101294645	2.160336684	4.358099715	12.28690441	12.28690441	16.16587161	20.26955523	30.55550067	35.28106577	39.84669923	37.28442159	37.2178677	37.2178677	34.52646363	24.20973376	6.853201756	17.77630398
14:53:19.115	0.101360957	0.101360957	2.161177198	4.359509588	12.2898578	12.2898578	16.1697329	20.27438267	30.56274291	35.28932751	39.85584316	37.2930385	37.22647843	37.22647843	34.53377525	24.21432503	6.85531118	17.77963296
14:53:20.091	0.101426563	0.101426563	2.162008495	4.36090392	12.29277846	12.29277846	16.17355135	20.27915651	30.56990469	35.29749736	39.86488522	37.30155937	37.23499316	37.23499316	34.54100523	24.21886498	6.857397216	17.78292473
14:53:21.069	0.10149234	0.10149234	2.162841665	4.362301317	12.29570537	12.29570537	16.17737792	20.28394047	30.57708158	35.30568433	39.87394611	37.31009792	37.24352553	37.24352553	34.54825008	24.22341419	6.859487703	17.78622322
14:53:22.033	0.101557208	0.101557208	2.163663064	4.363678896	12.2985906	12.2985906	16.18114996	20.28865621	30.58415607	35.3137544	39.88287746	37.31851434	37.25193583	37.25193583	34.55539117	24.22789818	6.861548409	17.78947442
14:53:23.012	0.10162312	0.10162312	2.164497402	4.365078096	12.30152095	12.30152095	16.18498094	20.29344559	30.59134097	35.3219503	39.89194794	37.32706181	37.26047706	37.26047706	34.56264331	24.23245184	6.863641324	17.79277615
14:53:23.989	0.101688932	0.101688932	2.165330204	4.366474643	12.30444557	12.30444557	16.18880437	20.29822551	30.59851162	35.33012985	39.90100017	37.33559203	37.26900102	37.26900102	34.56988067	24.23699616	6.865730136	17.79607109
14:53:24.977	0.101755521	0.101755521	2.166172545	4.367887107	12.30740334	12.30740334	16.19267111	20.30305952	30.60576335	35.33840178	39.9101545	37.3442184	37.27762103	37.27762103	34.57719948	24.24159154	6.867842616	17.79940307
14:53:25.940	0.101820458	0.101820458	2.166993728	4.369264016	12.31028649	12.31028649	16.19644025	20.30777148	30.61283191	35.34646467	39.91907735	37.35262659	37.286023	37.286023	34.58433303	24.24607054	6.869901788	17.80265067
14:53:26.931	0.10188732	0.10188732	2.167838956	4.370681163	12.31325372	12.31325372	16.20031926	20.31262075	30.62010641	35.35476236	39.9282599	37.36127943	37.29466941	37.29466941	34.59167401	24.25067971	6.872020999	17.80599266
14:53:27.902	0.101952866	0.101952866	2.168667287	4.372069902	12.3161613	12.3161613	16.20412024	20.31737244	30.62723446	35.3628929	39.93725731	37.36975777	37.30314142	37.30314142	34.59886681	24.25519578	6.874097593	17.80926714
14:53:28.886	0.102019325	0.102019325	2.169506874	4.373477433	12.31910806	12.31910806	16.20797239	20.32218804	30.63445832	35.37113262	39.94637542	37.37834977	37.31172698	37.31172698	34.6061559	24.25977224	6.876202151	17.81258542
14:53:29.856	0.102084873	0.102084873	2.170334681	4.37486514	12.32201313	12.32201313	16.21177001	20.32693544	30.64157982	35.37925548	39.95536406	37.38681973	37.32019056	37.32019056	34.61334131	24.26428353	6.878276933	17.81585645
14:53:30.834	0.102150996	0.102150996	2.171169472	4.376264475	12.32494239	12.32494239	16.21559918	20.33172225	30.64876037	35.38744559	39.96442697	37.39535961	37.32872399	37.32872399	34.6205859	24.26883192	6.880368967	17.81915438
14:53:31.809	0.102216952	0.102216952	2.172001866	4.377659716	12.32786289	12.32786289	16.21941688	20.33649468	30.65591928	35.39561092	39.97346231	37.40387346	37.33723137	37.33723137	34.62780827	24.27336629	6.882454745	17.82244215
14:53:32.783	0.102282874	0.102282874	2.172833578	4.379053737	12.33078068	12.33078068	16.22323096	20.34126255	30.6630713	35.40376828	39.9824887	37.41237881	37.34573024	37.34573024	34.6350233	24.27789599	6.884538563	17.82572653
14:53:33.768	0.102349577	0.102349577	2.173674844	4.380463692	12.33373164	12.33373164	16.22708838	20.34608454	30.67030445	35.41201807	39.9916172	37.42098033	37.35432518	37.35432518	34.64231977	24.28247675	6.886646065	17.82904794
14:53:34.742	0.102415569	0.102415569	2.174506877	4.381858096	12.33664988	12.33664988	16.23090297	20.35085297	30.67745718	35.42017603	40.00064397	37.42948593	37.36282423	37.36282423	34.64953472	24.28700626	6.888730186	17.8323322
14:53:35.720	0.102481868	0.102481868	2.175342499	4.383258436	12.33958037	12.33958037	16.23473354	20.35564132	30.68463974	35.42836791	40.00970811	37.43802669	37.37135841	37.37135841	34.65677937	24.29155436	6.890823045	17.83562994
14:53:36.695	0.102547998	0.102547998	2.176175717	4.384654669	12.3425021	12.3425021	16.2385526	20.36041525	30.6918006	35.43653494	40.01874462	37.44654136	37.37986647	37.37986647	34.66400174	24.2960884	6.892909631	17.83891749
14:53:37.660	0.102613484	0.102613484	2.177000551	4.386036778	12.34539411	12.34539411	16.24233276	20.36514052	30.69888841	35.44461855	40.02768869	37.45496886	37.38828742	37.38828742	34.67115005	24.30057589	6.894974977	17.84217129
14:53:38.646	0.10268043	0.10268043	2.1778435	4.387449164	12.34834929	12.34834929	16.24619546	20.36996891	30.70613085	35.45287842	40.03682762	37.46357992	37.39689175	37.39689175	34.67845391	24.30516096	6.897085429	17.84549585
14:53:39.616	0.102746325	0.102746325	2.178672934	4.388838828	12.35125676	12.35125676	16.24999575	20.37471925	30.71325616	35.46100459	40.04581849	37.47205141	37.4053566	37.4053566	34.68563925	24.30967156	6.899161796	17.84876642
14:53:40.601	0.102813275	0.102813275	2.179515369	4.390250194	12.35420947	12.35420947	16.25385511	20.3795434	30.72049212	35.46925684	40.0549487	37.48065415	37.41395256	37.41395256	34.69293577	24.31425189	6.901270453	17.85208755
14:53:41.576	0.10287958	0.10287958	2.180349414	4.391647427	12.35713243	12.35713243	16.25767555	20.38431886	30.72765498	35.47742563	40.06398643	37.48916968	37.42246137	37.42246137	34.70015819	24.31878564	6.903357859	17.85537491
14:53:42.551	0.10294592	0.10294592	2.181183623	4.393044858	12.36005564	12.36005564	16.26149627	20.38909462	30.73481823	35.48559476	40.0730244	37.49768538	37.43097031	37.43097031	34.70738062	24.32331933	6.905445426	17.85866223
14:53:43.521	0.103011955	0.103011955	2.182013723	4.39443533	12.36296412	12.36296412	16.26529769	20.39384623	30.74194519	35.49372239	40.08201631	37.50615764	37.43943582	37.43943582	34.71456606	24.32782973	6.907522462	17.86193267
14:53:44.507	0.103079114	0.103079114	2.182857681	4.395848936	12.36592082	12.36592082	16.26916208	20.3986765	30.7491901	35.50198443	40.09115677	37.5147698	37.4480411	37.4480411	34.72187002	24.33241447	6.909633921	17.86525701
14:53:45.473	0.103144947	0.103144947	2.183684691	4.397234078	12.36881781	12.36881781	16.27294839	20.40340915	30.75628851	35.5100793	40.10011214	37.52320751	37.45647203	37.45647203	34.72902589	24.33690619	6.911702729	17.86851391
14:53:46.464	0.103212519	0.103212519	2.184533269	4.398655265	12.37179002	12.37179002	16.27683296	20.40826456	30.76357099	35.51838398	40.10929948	37.53186372	37.46512128	37.46512128	34.73636693	24.34151407	6.913825235	17.87185505
14:53:47.438	0.103278967	0.103278967	2.185367454	4.40005227	12.37471148	12.37471148	16.28065116	20.41303698	30.77072894	35.52654653	40.11832944	37.5403716	37.47362228	37.47362228	34.74358203	24.34604284	6.91591149	17.87513883
14:53:48.409	0.103345246	0.103345246	2.186199247	4.401445192	12.37762424	12.37762424	16.28445793	20.41779507	30.77786534	35.53468441	40.12733197	37.54885358	37.48209738	37.48209738	34.75077503	24.35055767	6.917991515	17.8784125
14:53:49.393	0.103412448	0.103412448	2.187042341	4.402856962	12.38057623	12.38057623	16.28831594	20.42261716	30.78509768	35.54293158	40.13645525	37.55744927	37.49068607	37.49068607	34.75806433	24.35513288	6.920099547	17.88172996
14:53:50.355	0.103478181	0.103478181	2.187866747	4.404237362	12.38346246	12.38346246	16.29208795	20.42733174	30.7921687	35.5509947	40.14537478	37.56585294	37.49908287	37.49908287	34.76519065	24.35960573	6.922160606	17.8849732
14:53:51.340	0.103545523	0.103545523	2.188711038	4.40565098	12.38641798	12.38641798	16.29595047	20.43215939	30.79940925	35.55925103	40.1545079	37.57445779	37.50768066	37.50768066	34.77248743	24.36418551	6.924271128	17.88829399
14:53:52.310	0.103611874	0.103611874	2.189542632	4.407043262	12.38932872	12.38932872	16.29975441	20.4369138	30.80653989	35.56738192	40.16350212	37.58293172	37.51614761	37.51614761	34.77967306	24.36869546	6.926349659	17.89156414
14:53:53.283	0.103678465	0.103678465	2.190376972	4.408440066	12.39224874	12.39224874	16.30357044	20.44168327	30.81369307	35.57553842	40.17252452	37.59143213	37.524641	37.524641	34.78688101	24.37321935	6.928434808	17.89484441
14:53:54.275	0.103746393	0.103746393	2.191227772	4.409864346	12.39522602	12.39522602	16.30746126	20.44654618	30.82098633	35.58385452	40.18172332	37.60009869	37.53330038	37.53330038	34.79422971	24.37783152	6.930560835	17.89818869
14:53:55.244	0.103812782	0.103812782	2.192059026	4.41125583	12.39813458	12.39813458	16.31126222	20.45129673	30.82811102	35.59197832	40.19070925	37.60856465	37.54175929	37.54175929	34.80140816	24.38233677	6.932637772	17.90145546
14:53:56.213	0.103879206	0.103879206	2.192890437	4.412647498	12.40104336	12.40104336	16.31506341	20.45604754	30.83523604	35.60010239	40.19969534	37.6170307	37.55021827	37.55021827	34.80858656	24.38684193	6.934714851	17.90472216
14:53:57.195	0.103946556	0.103946556	2.193733173	4.414058049	12.40399143	12.40399143	16.31891591	20.46086243	30.84245711	35.60833586	40.2088023	37.62561056	37.55879095	37.55879095	34.81586133	24.39140751	6.936819976	17.90803267
14:53:58.181	0.104014218	0.104014218	2.194579523	4.415474567	12.4069518	12.4069518	16.32278443	20.46569731	30.8497081	35.61660334	40.21794673	37.63422567	37.56739881	37.56739881	34.82316584	24.39599168	6.938933871	17.91135668
14:53:59.141	0.10408013	0.10408013	2.195403716	4.416853928	12.40983434	12.40983434	16.3265512	20.47040499	30.85676826	35.62465315	40.22685024	37.64261376	37.57577983	37.57577983	34.83027773	24.40045491	6.940992181	17.91459299
14:54:00.128	0.104147932	0.104147932	2.19625127	4.418272307	12.41279826	12.41279826	16.33042426	20.47524546	30.86402751	35.63292984	40.23600457	37.65123808	37.58439685	37.58439685	34.83758978	24.40504369	6.94310858	17.91792035
14:55:15.788	0.10945362	0.10945362	2.261723744	4.527606483	12.64074881	12.64074881	16.62814524	20.84721338	31.4217055	36.26844424	40.93845805	38.31285801	38.24539007	38.24539007	35.39812021	24.75662539	7.105835354	18.17287527
14:55:16.772	0.109524027	0.109524027	2.262581588	4.529036007	12.6437225	12.6437225	16.63202711	20.85206181	31.42897261	36.27672134	40.94760109	38.32146749	38.25399062	38.25399062	35.40540883	24.76119468	7.107957603	18.17618909
14:55:17.744	0.109593611	0.109593611	2.263429129	4.530448287	12.64666016	12.64666016	16.63586187	20.85685138	31.43615144	36.28489777	40.9566328	38.32997208	38.26248638	38.26248638	35.41260852	24.76570817	7.110054114	18.17946244
14:55:18.729	0.109664161	0.109664161	2.264288163	4.531879641	12.64963732	12.64963732	16.63974815	20.86170525	31.44342661	36.29318383	40.96578544	38.33859049	38.27109582	38.27109582	35.41990443	24.77028192	7.112178804	18.1827795
14:55:19.700	0.109733744	0.109733744	2.265135158	4.533290859	12.65257243	12.65257243	16.64357949	20.86649046	31.45059882	36.30135252	40.97480828	38.34708663	38.2795831	38.2795831	35.42709669	24.77479063	7.11427347	18.18604942
14:55:20.680	0.109804008	0.109804008	2.265990155	4.534715335	12.65553495	12.65553495	16.64744655	20.87132025	31.4578378	36.30959713	40.98391484	38.35566155	38.28814906	38.28814906	35.43435551	24.77934102	7.116387678	18.18934956
14:55:21.659	0.109874236	0.109874236	2.266844442	4.536138552	12.65849467	12.65849467	16.65130992	20.87614539	31.46506977	36.31783365	40.99301231	38.36422786	38.2967064	38.2967064	35.4416069	24.78388668	7.118499881	18.19264629
14:55:22.630	0.109943926	0.109943926	2.267691906	4.537550329	12.66143044	12.66143044	16.65514196	20.88093137	31.47224299	36.32600316	41.00203561	38.37272428	38.30519391	38.30519391	35.448799	24.78839512	7.120594969	18.19591603
14:55:23.616	0.110014729	0.110014729	2.268552625	4.538984109	12.6644118	12.6644118	16.65903345	20.88579155	31.4795274	36.33429917	41.01119849	38.38135208	38.31381264	38.31381264	35.45610217	24.79297313	7.122722575	18.19923624
14:55:24.575	0.110083629	0.110083629	2.269389939	4.540378829	12.66731176	12.66731176	16.66281866	20.89051897	31.48661275	36.34236839	41.02011073	38.38974382	38.32219555	38.32219555	35.46320539	24.79742575	7.124792084	18.20246551
14:55:25.555	0.110154073	0.110154073	2.270245744	4.541804273	12.67027545	12.67027545	16.66668698	20.89535014	31.49385358	36.35061456	41.02921825	38.39831939	38.33076208	38.33076208	35.47046408	24.80197577	7.126907047	18.20576544
14:55:26.528	0.110224049	0.110224049	2.271095598	4.543219731	12.6732182	12.6732182	16.67052793	20.9001471	31.50104308	36.35880217	41.03826094	38.40683387	38.33926756	38.33926756	35.47767092	24.80649322	7.12900706	18.20904176
14:55:27.519	0.110295357	0.110295357	2.271961333	4.544661562	12.67621561	12.67621561	16.67444016	20.90503304	31.50836591	36.36714149	41.04747105	38.41550593	38.34793044	38.34793044	35.485011	24.81109414	7.13114606	18.21237862
14:55:28.490	0.110365261	0.110365261	2.27280976	4.546074493	12.67915277	12.67915277	16.67827371	20.90982067	31.51554134	36.37531286	41.0564955	38.42400313	38.35641863	38.35641863	35.49220295	24.81560215	7.13324205	18.21564811
14:55:29.475	0.110436209	0.110436209	2.273670578	4.547507983	12.6821325	12.6821325	16.68216276	20.91467759	31.52282057	36.38360231	41.06565022	38.43262293	38.36502928	38.36502928	35.49949852	24.82017506	7.135368401	18.21896468
14:55:30.447	0.110506258	0.110506258	2.274520204	4.548922759	12.68507316	12.68507316	16.68600076	20.91947072	31.53000416	36.39178274	41.07468438	38.44112918	38.37352647	38.37352647	35.50669785	24.82468759	7.137466858	18.22223746
14:55:31.416	0.110576126	0.110576126	2.275367366	4.55033336	12.68800498	12.68800498	16.68982717	20.92424933	31.53716594	36.39993823	41.08369086	38.4496093	38.38199756	38.38199756	35.51387494	24.82918612	7.139558988	18.2255001
14:55:32.399	0.110647039	0.110647039	2.276226932	4.551764538	12.6909794	12.6909794	16.69370913	20.92909727	31.54443158	36.40821188	41.09282767	38.4582121	38.39059117	38.39059117	35.52115571	24.83374957	7.1416815	18.22880985
14:55:33.369	0.110717051	0.110717051	2.277075292	4.553176983	12.69391471	12.69391471	16.69754	20.93388138	31.55160152	36.41637643	41.10184385	38.46670126	38.39907125	38.39907125	35.52834018	24.83825262	7.143776095	18.23207579
14:55:34.345	0.110787532	0.110787532	2.277929062	4.554598361	12.69686842	12.69686842	16.70139483	20.93869536	31.55881619	36.42459181	41.11091601	38.47524308	38.40760392	38.40760392	35.53556908	24.84278345	7.145883801	18.23536189
14:55:35.330	0.110858698	0.110858698	2.27879086	4.556033029	12.69984958	12.69984958	16.70528542	20.94355398	31.5660977	36.4328832	41.12007195	38.48386373	38.41621532	38.41621532	35.54286455	24.84735595	7.148011077	18.23867823
14:55:36.297	0.110928601	0.110928601	2.279637084	4.557441694	12.70277654	12.70277654	16.70910523	20.94832416	31.57324664	36.4410235	41.12906091	38.49232711	38.42466961	38.42466961	35.55002679	24.8518449	7.150099662	18.24193397
14:55:37.273	0.110999191	0.110999191	2.280491342	4.558863659	12.70573097	12.70573097	16.71296083	20.95313901	31.58046246	36.44923987	41.13813371	38.50086938	38.43320268	38.43320268	35.55725566	24.85637555	7.152207832	18.24521997
14:55:38.260	0.111070612	0.111070612	2.28135539	4.560301844	12.70871893	12.70871893	16.71686014	20.95800839	31.58775997	36.45754913	41.14730893	38.50950804	38.44183201	38.44183201	35.56456596	24.86095718	7.154339911	18.24854296
14:55:39.239	0.111141491	0.111141491	2.282212601	4.561728574	12.71168292	12.71168292	16.72072811	20.9628386	31.59499874	36.4657914	41.15641002	38.51807685	38.45039156	38.45039156	35.57181701	24.86550162	7.156454869	18.25183898
14:55:40.208	0.111211682	0.111211682	2.283061217	4.563140924	12.71461686	12.71461686	16.72455682	20.96761976	31.60216395	36.4739498	41.16541836	38.52655827	38.45886381	38.45886381	35.57899399	24.86999958	7.158548378	18.25510131
14:55:41.179	0.111282054	0.111282054	2.283911747	4.564556385	12.71755711	12.71755711	16.7283937	20.97241107	31.60934434	36.48212537	41.17444551	38.53505737	38.4673537	38.4673537	35.58618578	24.87450676	7.160646364	18.25837034
14:55:42.153	0.11135268	0.11135268	2.284765072	4.565976423	12.72050669	12.72050669	16.73224271	20.9772175	31.61654734	36.49032658	41.18350081	38.54358292	38.47586999	38.47586999	35.59339983	24.87902784	7.162750998	18.26164945
14:55:43.138	0.111424139	0.111424139	2.285628192	4.567412686	12.72348981	12.72348981	16.73613543	20.98207847	31.62383202	36.49862067	41.19265852	38.55220483	38.48448253	38.48448253	35.60069527	24.88359988	7.16487954	18.26496554
14:55:44.108	0.111494547	0.111494547	2.286478339	4.568827286	12.72642776	12.72642776	16.73996916	20.98686574	31.63100623	36.50678888	41.20167709	38.56069569	38.49296414	38.49296414	35.60787969	24.88810229	7.166975845	18.26823113
14:55:45.098	0.111566444	0.111566444	2.287346175	4.570271243	12.72942652	12.72942652	16.74388217	20.99175198	31.6383287	36.51512577	41.21088174	38.5693617	38.5016207	38.5016207	35.61521218	24.89269743	7.169115514	18.27156399
14:55:46.067	0.111636852	0.111636852	2.288195773	4.571684781	12.73236193	12.73236193	16.74771248	20.99653491	31.64549631	36.52328623	41.21989146	38.57784413	38.51009386	38.51009386	35.62238919	24.89719508	7.171209973	18.27482616
14:55:47.041	0.111707659	0.111707659	2.289049912	4.5731058	12.73531271	12.73531271	16.75156279	21.00134277	31.65270124	36.53148908	41.22894782	38.58637042	38.51861083	38.51861083	35.62960318	24.90171585	7.17331538	18.27810511
14:55:48.017	0.111778648	0.111778648	2.289905971	4.574529939	12.7382698	12.7382698	16.75542128	21.00616081	31.65992139	36.53970914	41.23802302	38.59491441	38.52714546	38.52714546	35.63683202	24.90624587	7.175425275	18.28139077
14:55:48.992	0.111849601	0.111849601	2.29076132	4.57595282	12.74122412	12.74122412	16.75927609	21.01097422	31.66713455	36.54792114	41.24708918	38.60344983	38.53567151	38.53567151	35.64405346	24.91077121	7.177533172	18.28467305
14:55:49.975	0.111921173	0.111921173	2.291623858	4.577387587	12.74420294	12.74420294	16.76316282	21.01582745	31.67440735	36.55620092	41.25623002	38.61205551	38.54426773	38.54426773	35.65133422	24.91533365	7.179658538	18.28798225
14:55:50.945	0.111991834	0.111991834	2.292475145	4.578803564	12.74714258	12.74714258	16.76699838	21.02061675	31.6815843	36.56437147	41.26525011	38.62054747	38.55275034	38.55275034	35.65851862	24.91983566	7.181755935	18.29124764
14:55:51.924	0.112063188	0.112063188	2.2933345	4.580232884	12.75010976	12.75010976	16.77086981	21.0254508	31.68882827	36.5726182	41.27435417	38.62911841	38.56131184	38.56131184	35.66576972	24.92437941	7.183872961	18.29454331
14:55:52.907	0.112134871	0.112134871	2.294197542	4.581668262	12.75308934	12.75308934	16.77475737	21.03030496	31.69610234	36.58089908	41.28349575	38.63772465	38.56990857	38.56990857	35.67305053	24.92894173	7.185998821	18.29785245
14:55:53.889	0.112206518	0.112206518	2.295059863	4.583102365	12.75606611	12.75606611	16.7786412	21.03515442	31.70336932	36.58917179	41.29262817	38.6463222	38.57849661	38.57849661	35.68032386	24.9334993	7.188122655	18.30115817
14:55:54.850	0.112276668	0.112276668	2.295903909	4.584506003	12.75897947	12.75897947	16.78244226	21.0399005	31.71048133	36.59726797	41.30156556	38.6547361	38.5869012	38.5869012	35.68744169	24.93795938	7.190201238	18.30439318
14:55:55.828	0.112348096	0.112348096	2.296763049	4.585934668	12.76194462	12.76194462	16.78631082	21.04473082	31.71771955	36.6055077	41.31066128	38.663299	38.59545461	38.59545461	35.69468544	24.94249831	7.192316749	18.3076854
14:55:56.813	0.112420073	0.112420073	2.297628513	4.587373773	12.76493126	12.76493126	16.79020737	21.04959606	31.72501004	36.61380683	41.3198224	38.67192343	38.60406946	38.60406946	35.7019811	24.94706971	7.194447579	18.31100118
14:55:57.779	0.112490697	0.112490697	2.298477441	4.588785307	12.76786052	12.76786052	16.794029	21.05436771	31.73216026	36.62194618	41.32880699	38.68038162	38.61251824	38.61251824	35.709136	24.95155285	7.196537452	18.31425296
14:55:58.769	0.112563114	0.112563114	2.299347637	4.590232129	12.77086283	12.77086283	16.7979459	21.05925826	31.73948862	36.63028818	41.33801513	38.68905021	38.62117718	38.62117718	35.71646874	24.95614738	7.198679432	18.31758554
14:55:59.738	0.11263403	0.11263403	2.300199532	4.591648448	12.77380168	12.77380168	16.80177994	21.06404534	31.74666187	36.63845351	41.34702811	38.69753502	38.62965254	38.62965254	35.72364589	24.96064436	7.200776119	18.32084738
14:57:15.221	0.118269486	0.118269486	2.367053081	4.702569789	13.00345533	13.00345533	17.10121754	21.43780404	32.30660794	37.27549978	42.04974946	39.35892678	39.29027039	39.29027039	36.28270043	25.31077064	7.364567732	18.57484317
14:57:16.194	0.118343562	0.118343562	2.367921057	4.704007003	13.00642447	13.00642447	17.10508667	21.44263208	32.31383957	37.28372274	42.05881442	39.36745659	39.29878977	39.29878977	36.28990531	25.31528088	7.366684667	18.5781155
14:57:17.174	0.118418206	0.118418206	2.368795427	4.705454732	13.00941517	13.00941517	17.10898384	21.44749506	32.3211235	37.29200506	42.06794466	39.37604779	39.30737044	39.30737044	36.2971619	25.31982346	7.368816953	18.58141129
14:57:18.149	0.118492509	0.118492509	2.369665512	4.706895293	13.01239089	13.01239089	17.11286143	21.45233359	32.32837076	37.30024557	42.07702867	39.38459543	39.31590761	39.31590761	36.30438158	25.32434286	7.370938544	18.58469028
14:57:19.126	0.118567	0.118567	2.370537533	4.708338984	13.01537291	13.01537291	17.11674717	21.45718225	32.33563317	37.30850319	42.0861314	39.39316062	39.32446229	39.32446229	36.31161596	25.32887142	7.373064609	18.58797593
14:57:20.090	0.118640537	0.118640537	2.371398119	4.709763671	13.01831552	13.01831552	17.1205815	21.46196671	32.34279938	37.31665132	42.09511329	39.40161208	39.33290336	39.33290336	36.31875414	25.33333971	7.375162554	18.59121785
14:57:21.077	0.118715866	0.118715866	2.372279396	4.711222537	13.02132855	13.02132855	17.12450753	21.46686558	32.35013691	37.32499413	42.10430964	39.41026526	39.3415459	39.3415459	36.32606258	25.33791452	7.377310693	18.59453707
14:57:22.046	0.118789858	0.118789858	2.373144754	4.712654977	13.02428685	13.02428685	17.12836218	21.47167533	32.35734093	37.33318502	42.11333839	39.41876069	39.35003087	39.35003087	36.33323765	25.3424058	7.379419786	18.59779569
14:57:23.031	0.11886511	0.11886511	2.374024577	4.714111285	13.02729427	13.02729427	17.13228078	21.47656485	32.36466437	37.34151158	42.12251654	39.42739665	39.35865619	39.35865619	36.34053128	25.34697124	7.381563883	18.60110813
14:57:24.009	0.118939865	0.118939865	2.37489831	4.71555744	13.03028055	13.03028055	17.13617179	21.48141989	32.37193615	37.34977929	42.13162968	39.43597137	39.36722034	39.36722034	36.34777307	25.35150418	7.383692896	18.60439699
14:57:24.992	0.11901504	0.11901504	2.375776672	4.717011181	13.03328234	13.03328234	17.14008293	21.48630002	32.37924546	37.35808956	42.14078958	39.44459005	39.37582837	39.37582837	36.35505184	25.35606022	7.385832937	18.60770263
14:57:25.963	0.119089334	0.119089334	2.376644471	4.718447365	13.0362477	13.0362477	17.14394656	21.49112084	32.38646589	37.36629867	42.14983785	39.45310363	39.38433142	39.38433142	36.36224174	25.36056057	7.387946999	18.61096787
14:57:26.933	0.119163588	0.119163588	2.377511536	4.719882263	13.03921025	13.03921025	17.14780646	21.49593696	32.39367927	37.37449964	42.158877	39.46160859	39.39282585	39.39282585	36.36942422	25.36505623	7.390059033	18.61422971
14:57:27.919	0.119239106	0.119239106	2.378393079	4.721341045	13.04222194	13.04222194	17.15173033	21.50083287	32.4010121	37.38283631	42.16806558	39.47025408	39.40146063	39.40146063	36.37672525	25.36962604	7.392206084	18.61754537
14:57:28.895	0.119313896	0.119313896	2.379265842	4.722785222	13.04520332	13.04520332	17.15561464	21.50567939	32.40827091	37.39108871	42.17716114	39.478812	39.41000794	39.41000794	36.38395221	25.37414943	7.394331504	18.62082735
14:57:29.874	0.119388952	0.119388952	2.380141452	4.724234036	13.0481941	13.0481941	17.15951115	21.51054108	32.41555242	37.39936681	42.18628487	39.48739637	39.41858165	39.41858165	36.39120138	25.37868668	7.39646361	18.6241194
14:57:30.834	0.119462589	0.119462589	2.381000229	4.725654927	13.05112708	13.05112708	17.1633323	21.51530871	32.42269301	37.40748458	42.19523177	39.49581431	39.42698913	39.42698913	36.39830987	25.38313582	7.398554492	18.62734753
14:57:31.821	0.119538335	0.119538335	2.381883325	4.727115978	13.05414279	13.05414279	17.16726117	21.52021071	32.43003481	37.41583099	42.20443051	39.50446915	39.4356332	39.4356332	36.40561829	25.38771005	7.400704333	18.63066642
14:57:32.796	0.119613198	0.119613198	2.382755851	4.728559468	13.05712209	13.05712209	17.17114254	21.52505341	32.43728775	37.42407628	42.21351767	39.51301894	39.44417234	39.44417234	36.41283788	25.39222862	7.402828197	18.63394494
14:57:33.774	0.11968833	0.11968833	2.383631231	4.730007606	13.06011081	13.06011081	17.17503613	21.52991133	32.44456345	37.43234732	42.22263306	39.52159525	39.45273796	39.45273796	36.42007973	25.39676108	7.404958764	18.63723355
14:57:34.749	0.119763268	0.119763268	2.384504089	4.731451498	13.06309061	13.06309061	17.17891804	21.53475462	32.45181722	37.44059331	42.23172071	39.5301454	39.46127744	39.46127744	36.42729936	25.40127958	7.407082948	18.64051203
14:57:35.720	0.119837936	0.119837936	2.385373528	4.732889659	13.06605842	13.06605842	17.18278427	21.53957832	32.45904159	37.44880578	42.24077128	39.53866061	39.46978201	39.46978201	36.43448937	25.40577948	7.409198567	18.64377704
14:57:36.703	0.119913565	0.119913565	2.386253882	4.734345801	13.06906317	13.06906317	17.18669856	21.54446194	32.46635568	37.45712012	42.24993397	39.54728126	39.47839188	39.47839188	36.44176828	25.41033498	7.411340498	18.64708238
14:57:37.678	0.119988618	0.119988618	2.387127248	4.735790311	13.07204375	13.07204375	17.19058131	21.54930618	32.47361075	37.46536724	42.25902245	39.55583203	39.48693194	39.48693194	36.44898806	25.41485342	7.413465184	18.65036085
14:57:38.648	0.120063322	0.120063322	2.387996286	4.737227589	13.07500925	13.07500925	17.19444435	21.55412579	32.48082889	37.47357229	42.26806442	39.56433899	39.49542824	39.49542824	36.45617072	25.41934857	7.415579098	18.65362243
14:57:39.633	0.120139219	0.120139219	2.388878933	4.7386873	13.07802086	13.07802086	17.1983674	21.55902025	32.48815908	37.4819046	42.27724649	39.57297771	39.50405612	39.50405612	36.4634645	25.42391322	7.417725868	18.65693444
14:57:40.611	0.120214616	0.120214616	2.389755487	4.74013686	13.08101137	13.08101137	17.2022629	21.56388028	32.49543769	37.49017815	42.28636367	39.58155532	39.51262295	39.51262295	36.47070656	25.42844544	7.419857571	18.66022293
14:57:41.581	0.120289435	0.120289435	2.390625037	4.741574764	13.08397766	13.08397766	17.2061268	21.56870086	32.50265718	37.49838439	42.29540654	39.59006296	39.5211199	39.5211199	36.47788942	25.43294057	7.421971999	18.66348452
14:57:42.557	0.120364753	0.120364753	2.391500131	4.743021761	13.08696255	13.08696255	17.21001487	21.57355155	32.50992172	37.50664173	42.30450558	39.59862339	39.52966956	39.52966956	36.48511673	25.43746346	7.424099664	18.66676626
14:57:43.527	0.120439646	0.120439646	2.392370004	4.744460054	13.08992932	13.08992932	17.21387927	21.57837269	32.51714196	37.51484861	42.31354887	39.60713132	39.53816677	39.53816677	36.49229959	25.44195848	7.426214394	18.67002778
14:57:44.520	0.120516355	0.120516355	2.393260686	4.745932675	13.09296674	13.09296674	17.21783563	21.58330851	32.52453392	37.52325054	42.32280697	39.61584128	39.54686575	39.54686575	36.49965289	25.44656011	7.428379458	18.67336667
14:57:45.486	0.120591015	0.120591015	2.394127311	4.74736545	13.0959218	13.0959218	17.22168467	21.5881104	32.53172526	37.53142435	42.33181354	39.62431456	39.55532833	39.55532833	36.50680624	25.45103656	7.430485805	18.67661473
14:57:46.474	0.120667414	0.120667414	2.39501385	4.748831071	13.09894444	13.09894444	17.22562167	21.593022	32.53908086	37.53978473	42.34102556	39.63298106	39.56398388	39.56398388	36.51412259	25.45561497	7.432640302	18.67993679
14:57:47.436	0.120741841	0.120741841	2.39587723	4.750258334	13.10188781	13.10188781	17.22945536	21.59780467	32.54624335	37.54792552	42.34999548	39.64141975	39.57241189	39.57241189	36.52124649	25.46007289	7.434738277	18.68317142
14:57:48.428	0.120818627	0.120818627	2.396767702	4.751730308	13.10492322	13.10492322	17.23340886	21.60273678	32.5536296	37.55632051	42.35924537	39.65012176	39.58110288	39.58110288	36.52859256	25.46466979	7.436901836	18.68650691
14:57:49.388	0.120892975	0.120892975	2.397629618	4.753155006	13.10786098	13.10786098	17.23723513	21.60751012	32.56077803	37.5644451	42.36819717	39.65854329	39.58951374	39.58951374	36.53570174	25.4691184	7.438995773	18.6897348
14:57:50.372	0.120969219	0.120969219	2.398513251	4.754615526	13.11087244	13.11087244	17.24115732	21.6124031	32.5681056	37.57277317	42.37737303	39.66717555	39.59813505	39.59813505	36.54298868	25.47367819	7.441142224	18.69304338
14:57:51.347	0.121044804	0.121044804	2.399388974	4.756062897	13.11385662	13.11385662	17.24504393	21.61725164	32.57536659	37.58102546	42.38646526	39.67572908	39.60667772	39.60667772	36.55020904	25.47819626	7.443269213	18.69632169
14:57:52.332	0.121121203	0.121121203	2.400273849	4.75752532	13.11687167	13.11687167	17.24897068	21.62215023	32.58270248	37.58936276	42.39565102	39.68437054	39.61530819	39.61530819	36.55750349	25.48276065	7.445418184	18.69963362
14:57:53.299	0.121196245	0.121196245	2.401142734	4.758961243	13.11983193	13.11983193	17.252826	21.62695968	32.58990485	37.5975482	42.40466932	39.69285441	39.62378126	39.62378126	36.56466479	25.48724167	7.447528079	18.70288506
14:57:54.279	0.121272334	0.121272334	2.402023468	4.760416674	13.12283223	13.12283223	17.25673342	21.63183408	32.59720445	37.60584404	42.41380911	39.70145252	39.63236842	39.63236842	36.5719224	25.49178291	7.449666502	18.7061802
14:57:55.265	0.121348928	0.121348928	2.402909764	4.761881222	13.12585116	13.12585116	17.26066505	21.63673864	32.60454917	37.61419103	42.42300513	39.71010346	39.64100833	39.64100833	36.57922448	25.49635191	7.451818182	18.7094955
14:57:56.225	0.12142354	0.12142354	2.403772863	4.763307364	13.12879077	13.12879077	17.2644933	21.64151422	32.6117007	37.62231836	42.431959	39.71852656	39.64942068	39.64942068	36.58633412	25.50080045	7.453913305	18.7127234
14:57:57.206	0.121499824	0.121499824	2.404655018	4.76476492	13.13179496	13.13179496	17.26840561	21.64639461	32.61900915	37.63062391	42.44110909	39.72713418	39.6580173	39.6580173	36.59359938	25.50534632	7.456054441	18.71602193
14:57:58.179	0.121575523	0.121575523	2.405530152	4.766210801	13.13477493	13.13477493	17.2722863	21.65123553	32.62625846	37.63886214	42.45018487	39.73567184	39.66654404	39.66654404	36.60080547	25.50985511	7.45817829	18.71929356
14:57:59.170	0.121652662	0.121652662	2.406421649	4.767683641	13.13781029	13.13781029	17.27623907	21.65616632	32.63364232	37.64725316	42.45942883	39.74436767	39.67522873	39.67522873	36.60814493	25.51444729	7.460341601	18.7226257
14:58:00.135	0.121727816	0.121727816	2.407289923	4.769118042	13.14076627	13.14076627	17.28008842	21.66096806	32.64083288	37.65542439	42.46843054	39.75283554	39.68368575	39.68368575	36.61529187	25.51891897	7.462448318	18.72587042
14:59:16.032	0.12775493	0.12775493	2.476075605	4.882525649	13.37397275	13.37397275	17.58358672	22.0394471	33.20748802	38.29901745	43.17702837	40.41923337	40.34919716	40.34919716	37.1773645	25.87043894	7.628593133	18.98095677
14:59:17.004	0.127833584	0.127833584	2.476962489	4.883984963	13.37696724	13.37696724	17.58748135	22.0443025	33.21475604	38.30726788	43.18610709	40.42776906	40.35772109	40.35772109	37.18455927	25.87493656	7.630725721	18.98422073
14:59:17.982	0.127912761	0.127912761	2.477854997	4.885453457	13.37998041	13.37998041	17.5914002	22.04918808	33.22206918	38.31556942	43.19524192	40.43635745	40.36629764	40.36629764	37.19179834	25.87946183	7.63287159	18.98750476
14:59:18.963	0.127992219	0.127992219	2.478750394	4.88692663	13.38300302	13.38300302	17.59533127	22.05408884	33.22940503	38.32389662	43.20440485	40.4449722	40.3749005	40.3749005	37.19905952	25.88400086	7.635024159	18.99079878
14:59:19.936	0.128071065	0.128071065	2.47963863	4.888387949	13.38600115	13.38600115	17.59923043	22.0589498	33.23668124	38.33215601	43.21349306	40.45351663	40.38343313	40.38343313	37.20626131	25.88850272	7.637159272	18.99406582
14:59:20.911	0.128150112	0.128150112	2.480528857	4.889852468	13.38900568	13.38900568	17.60313785	22.06382102	33.24397279	38.3404327	43.22260017	40.46207878	40.39198345	40.39198345	37.21347792	25.8930138	7.639298925	18.99733956
14:59:21.885	0.128229115	0.128229115	2.481418315	4.891315651	13.39200731	13.39200731	17.60704144	22.06868742	33.25125709	38.34870105	43.23169798	40.47063211	40.40052495	40.40052495	37.22068699	25.8975201	7.641436491	19.00060984
14:59:22.866	0.128308725	0.128308725	2.482314325	4.892789535	13.39503073	13.39503073	17.6109733	22.07358904	33.25859407	38.35702907	43.24086132	40.479247	40.40912791	40.40912791	37.22794782	25.90205872	7.643589553	19.00390357
14:59:23.842	0.128387966	0.128387966	2.483205921	4.894256088	13.39803895	13.39803895	17.61488533	22.07846589	33.26589394	38.36531487	43.24997809	40.48781804	40.41768707	40.41768707	37.23517157	25.90657411	7.645731769	19.00718044
14:59:24.828	0.128468058	0.128468058	2.484106804	4.895737839	13.40107818	13.40107818	17.61883763	22.0833929	33.27326885	38.37368573	43.25918832	40.49647688	40.4263339	40.4263339	37.24246921	25.91113563	7.647896048	19.0104908
14:59:25.793	0.128546482	0.128546482	2.484988659	4.897188222	13.40405292	13.40405292	17.62270598	22.08821524	33.28048705	38.38187861	43.2682026	40.50495144	40.4347967	40.4347967	37.24961143	25.91559995	7.650014376	19.01373063
14:59:26.774	0.128626243	0.128626243	2.485885285	4.898662824	13.40707716	13.40707716	17.62663866	22.09311773	33.28782518	38.39020749	43.27736639	40.5135665	40.44339979	40.44339979	37.25687194	25.92013817	7.652167939	19.01702408
14:59:27.741	0.128704905	0.128704905	2.486769278	4.900116578	13.41005849	13.41005849	17.63051546	22.09795053	33.29505897	38.39841783	43.28639965	40.52205878	40.45188026	40.45188026	37.26402886	25.92461158	7.654290923	19.0202705
14:59:28.722	0.128784743	0.128784743	2.487666217	4.901591546	13.41308316	13.41308316	17.63444857	22.10285348	33.30239772	38.40674719	43.29556373	40.53067398	40.46048348	40.46048348	37.27128926	25.92914963	7.656444749	19.02356384
14:59:29.709	0.128865109	0.128865109	2.488568809	4.903075738	13.41612659	13.41612659	17.63840599	22.1077867	33.30978174	38.41512783	43.3047841	40.53934203	40.46913946	40.46913946	37.27859409	25.93371539	7.658611906	19.02687729
14:59:30.679	0.128944129	0.128944129	2.489456006	4.90453454	13.41911778	13.41911778	17.64229544	22.11263516	33.31703885	38.42336431	43.31384574	40.54786081	40.47764636	40.47764636	37.285773	25.9382024	7.660741854	19.03013359
14:59:31.655	0.129023675	0.129023675	2.490348849	4.906002552	13.42212771	13.42212771	17.64620917	22.11751385	33.32434119	38.43165201	43.32296361	40.55643239	40.48620598	40.48620598	37.29299628	25.9427171	7.662885115	19.03340999
14:59:32.625	0.129102771	0.129102771	2.491236364	4.907461732	13.42511936	13.42511936	17.65009909	22.12236282	33.33159899	38.43988905	43.33202563	40.56495139	40.49471309	40.49471309	37.30017516	25.94720399	7.665015345	19.03666621
14:59:33.606	0.129182802	0.129182802	2.492134093	4.90893763	13.42814513	13.42814513	17.65403329	22.12726696	33.33893935	38.44821967	43.34119049	40.57356701	40.50331667	40.50331667	37.30743533	25.95174164	7.667169847	19.03995927
14:59:34.577	0.129262055	0.129262055	2.493022831	4.910398674	13.43114029	13.43114029	17.65792763	22.13212138	33.34620523	38.45646566	43.35026211	40.58209491	40.51183265	40.51183265	37.31462149	25.95623298	7.669302529	19.04321872
14:59:35.561	0.129342408	0.129342408	2.493923633	4.911879476	13.43417579	13.43417579	17.66187436	22.13704105	33.35356876	38.46482236	43.3594554	40.59073714	40.52046278	40.52046278	37.32190385	25.9607844	7.671463914	19.04652178
14:59:36.534	0.129421902	0.129421902	2.494814525	4.913343913	13.43717758	13.43717758	17.6657772	22.14190599	33.36085032	38.47308591	43.3685461	40.59928286	40.52899653	40.52899653	37.32910479	25.96528488	7.673601277	19.04978787
14:59:37.517	0.129502251	0.129502251	2.495714731	4.914823587	13.44021044	13.44021044	17.66972037	22.14682116	33.36820703	38.48143465	43.37773039	40.60791649	40.53761806	40.53761806	37.33637968	25.96983153	7.675760743	19.05308748
14:59:38.488	0.129581659	0.129581659	2.496604116	4.9162854	13.44320654	13.44320654	17.67361567	22.15167663	33.37547435	38.48968181	43.38680282	40.61644491	40.54613451	40.54613451	37.34356581	25.97432265	7.677894006	19.05634679
14:59:39.467	0.129661759	0.129661759	2.49750098	4.917759434	13.44622752	13.44622752	17.67754326	22.15657231	33.38280181	38.49799713	43.39595011	40.62504363	40.55472116	40.55472116	37.35081106	25.97885067	7.680044966	19.05963288
14:59:40.453	0.129742471	0.129742471	2.49840442	4.919244199	13.44927033	13.44927033	17.68149917	22.16150325	33.39018202	38.50637218	43.40516298	40.63370394	40.5633693	40.5633693	37.35810809	25.98341101	7.682211449	19.06294242
14:59:41.423	0.129821912	0.129821912	2.499293369	4.920705077	13.45226402	13.45226402	17.68539115	22.16635448	33.39744289	38.5146117	43.41422664	40.64222392	40.5718773	40.5718773	37.36528677	25.98789733	7.684342941	19.06619824
14:59:42.387	0.1299009	0.1299009	2.500176972	4.922157096	13.45523941	13.45523941	17.68925928	22.17117593	33.40465915	38.52280048	43.42323437	40.65069127	40.58033272	40.58033272	37.37242099	25.99235581	7.686461376	19.06943388
14:59:43.373	0.129981729	0.129981729	2.501080902	4.923642444	13.45828292	13.45828292	17.69321591	22.17610767	33.41204044	38.53117642	43.43244785	40.65935196	40.58898122	40.58898122	37.379718	25.99691599	7.688628299	19.07274331
14:59:44.343	0.130061286	0.130061286	2.501970333	4.925103895	13.46127732	13.46127732	17.69710861	22.18095968	33.41930237	38.53941682	43.44151212	40.66787232	40.59748957	40.59748957	37.38689667	26.00140215	7.690760223	19.07599903
14:59:45.328	0.130142112	0.130142112	2.502873676	4.92658813	13.46431823	13.46431823	17.70106173	22.18588696	33.42667692	38.54778488	43.45071669	40.67652451	40.60612955	40.60612955	37.39418629	26.0059576	7.692925247	19.07930503
14:59:46.312	0.130222895	0.130222895	2.503776272	4.928071062	13.46735631	13.46735631	17.70501109	22.19080954	33.43404438	38.55614479	43.45991218	40.6851681	40.61476093	40.61476093	37.40146854	26.0105084	7.695088233	19.08260767
14:59:47.276	0.130302076	0.130302076	2.504660686	4.92952405	13.47033289	13.47033289	17.70888044	22.19563234	33.44126248	38.56433511	43.46892101	40.69363616	40.62321703	40.62321703	37.40860281	26.01496667	7.697207409	19.08584315
14:59:48.261	0.130383021	0.130383021	2.505564532	4.93100889	13.47337455	13.47337455	17.71283434	22.20056049	33.44863821	38.57270418	43.47812632	40.70228886	40.63185748	40.63185748	37.41589251	26.01952202	7.699372903	19.08914909
14:59:49.233	0.130462936	0.130462936	2.506456614	4.932474328	13.47637631	13.47637631	17.7167363	22.20542386	33.45591697	38.5809631	43.48721037	40.7108275	40.64038404	40.64038404	37.42308601	26.0240172	7.701509967	19.09241137
14:59:50.213	0.130543549	0.130543549	2.507356206	4.93395203	13.47940303	13.47940303	17.72067063	22.21032756	33.46325604	38.58929034	43.49636944	40.71943659	40.64898094	40.64898094	37.43033875	26.02854936	7.703664777	19.09570049
14:59:51.182	0.130623296	0.130623296	2.508245865	4.935413343	13.48239603	13.48239603	17.72456107	22.2151765	33.47051312	38.59752444	43.50542596	40.72794923	40.6574815	40.6574815	37.43751012	26.03303062	7.705795556	19.09895266
14:59:52.167	0.130704399	0.130704399	2.509150375	4.936898975	13.48543867	13.48543867	17.72851597	22.22010576	33.47789036	38.60589477	43.51463218	40.73660252	40.66612251	40.66612251	37.44479987	26.0375858	7.707961657	19.10225849
14:59:53.136	0.130784223	0.130784223	2.510040363	4.938360681	13.48843215	13.48843215	17.7324069	22.22495525	33.4851482	38.61412952	43.52368916	40.74511546	40.67462337	40.67462337	37.45197127	26.04206698	7.710092739	19.10551061
14:59:54.115	0.130864912	0.130864912	2.510939703	4.939837676	13.49145678	13.49145678	17.73633826	22.22985509	33.49248135	38.62244959	43.53283987	40.75371644	40.68321213	40.68321213	37.45921674	26.04659438	7.712245974	19.10879628
14:59:55.084	0.130944815	0.130944815	2.511830024	4.941299784	13.49445076	13.49445076	17.74022972	22.23470518	33.49973999	38.63068503	43.54189738	40.76222975	40.69171333	40.69171333	37.46638823	26.05107552	7.714377372	19.11204837
14:59:56.069	0.131026076	0.131026076	2.51273521	4.942786228	13.49749442	13.49749442	17.74418568	22.23963561	33.50711885	38.63905674	43.55110464	40.77088376	40.70035502	40.70035502	37.47367813	26.0556306	7.71654411	19.11535413
14:59:57.047	0.131106802	0.131106802	2.513634144	4.944262333	13.50051674	13.50051674	17.74811384	22.24453136	33.51444578	38.64736941	43.56024686	40.77947656	40.70893558	40.70893558	37.48091636	26.06015334	7.718695638	19.11863642
14:59:58.025	0.131187566	0.131187566	2.51453324	4.94573863	13.5035393	13.5035393	17.75204225	22.24942738	33.52177306	38.65568238	43.56938928	40.78806949	40.71751626	40.71751626	37.48815459	26.06467602	7.720847312	19.12191867
14:59:59.000	0.131268123	0.131268123	2.515429753	4.947210612	13.50655286	13.50655286	17.75595889	22.25430871	33.52907832	38.66397026	43.57850399	40.79663631	40.72607085	40.72607085	37.49537071	26.06918485	7.72299256	19.12519087
14:59:59.976	0.131348802	0.131348802	2.516327355	4.948684308	13.50956978	13.50956978	17.75987983	22.25919535	33.53639149	38.67226699	43.58762832	40.80521211	40.73463441	40.73463441	37.50259428	26.07369828	7.72514017	19.12846641
15:01:15.428	0.137706426	0.137706426	2.586226538	5.06322225	13.74356468	13.74356468	18.06378931	22.63784846	34.102962	39.31469666	44.29379496	41.468724	41.39717068	41.39717068	38.06115437	26.42254865	7.891643051	19.38163849
15:01:16.421	0.137791681	0.137791681	2.587152994	5.064737422	13.74665376	13.74665376	18.06779866	22.64284246	34.110433	39.32316349	44.30309742	41.47746183	41.4058953	41.4058953	38.06850585	26.42713809	7.893840219	19.38496915
15:01:17.393	0.137875174	0.137875174	2.588060022	5.066220746	13.74967776	13.74967776	18.07172347	22.64773112	34.11774637	39.33145157	44.31220338	41.48601501	41.41443555	41.41443555	38.07570188	26.43163043	7.895991069	19.38822935
15:01:18.377	0.137959737	0.137959737	2.588978402	5.067722561	13.75273929	13.75273929	18.07569692	22.65268033	34.12515029	39.33984216	44.32142186	41.49467382	41.42308125	41.42308125	38.08298666	26.43617814	7.898168592	19.39152972
15:01:19.343	0.138042793	0.138042793	2.589880143	5.069197093	13.75574504	13.75574504	18.07959791	22.65753927	34.13241913	39.34807954	44.33047191	41.50317435	41.43156891	41.43156891	38.09013818	26.44064261	7.900306424	19.39476967
15:01:20.317	0.138126574	0.138126574	2.590789495	5.070683999	13.75877586	13.75877586	18.08353137	22.6624386	34.13974836	39.35638527	44.33959694	41.51174524	41.4401268	41.4401268	38.09734879	26.44514391	7.90246206	19.39803636
15:01:21.303	0.138211428	0.138211428	2.591710219	5.072189424	13.76184428	13.76184428	18.08751354	22.66739857	34.14716827	39.36479363	44.34883463	41.52042188	41.44879028	41.44879028	38.10464826	26.44970064	7.904644406	19.40134327
15:01:22.269	0.138294599	0.138294599	2.592612407	5.073664469	13.76485061	13.76485061	18.09141509	22.67225808	34.15443786	39.37303154	44.35788494	41.52892245	41.45727795	41.45727795	38.11179951	26.45416479	7.906782578	19.40458299
15:01:23.244	0.138378585	0.138378585	2.593523164	5.075153452	13.76788519	13.76788519	18.09535322	22.67716313	34.16177554	39.3813465	44.36701979	41.53750236	41.46584482	41.46584482	38.1190174	26.45867049	7.908940819	19.40785287
15:01:24.230	0.138463558	0.138463558	2.594444345	5.076659402	13.7709542	13.7709542	18.09933595	22.68212369	34.16919622	39.3897554	44.37625776	41.54617903	41.47450831	41.47450831	38.12631659	26.4632269	7.911123514	19.41115953
15:01:25.208	0.13854788	0.13854788	2.595358202	5.078153305	13.77399849	13.77399849	18.10328655	22.68704418	34.17655694	39.39809624	44.38542084	41.55478531	41.4831015	41.4831015	38.13355646	26.46774622	7.913288612	19.41443929
15:01:26.189	0.1386325	0.1386325	2.596275023	5.079651979	13.77705235	13.77705235	18.10724948	22.69198002	34.18394057	39.40646292	44.3946122	41.56341808	41.49172113	41.49172113	38.1408185	26.47227934	7.915460488	19.41772905
15:01:27.161	0.138716384	0.138716384	2.597183581	5.081137073	13.78007838	13.78007838	18.11117623	22.69687075	34.19125669	39.414753	44.40371931	41.57197164	41.50026167	41.50026167	38.14801382	26.47677076	7.917612547	19.42098854
15:01:28.136	0.138800564	0.138800564	2.598095092	5.082626922	13.78311393	13.78311393	18.11511528	22.70177676	34.19859563	39.42306883	44.4128546	41.5805516	41.50882855	41.50882855	38.15523124	26.48127593	7.919771361	19.42425802
15:01:29.105	0.138884266	0.138884266	2.599001149	5.084107781	13.78613102	13.78613102	18.1190303	22.7066528	34.20588971	39.43133371	44.42193381	41.58907882	41.51734277	41.51734277	38.16240419	26.4857533	7.921917015	19.42750731
15:01:30.081	0.138968611	0.138968611	2.599913895	5.085599501	13.78917008	13.78917008	18.12297375	22.71156423	34.21323668	39.43965841	44.43107864	41.5976676	41.52591845	41.52591845	38.16962883	26.49026287	7.92407827	19.43077997
15:01:31.060	0.139053254	0.139053254	2.600829597	5.087095978	13.79221867	13.79221867	18.1269295	22.71649094	34.22060649	39.44800887	44.44025167	41.60628278	41.53452048	41.53452048	38.17687557	26.4947862	7.926246282	19.43406261
15:01:32.033	0.139137417	0.139137417	2.601739839	5.08858346	13.79524878	13.79524878	18.1308612	22.72138766	34.22793139	39.45630835	44.44936857	41.61484519	41.54306981	41.54306981	38.18407782	26.49928171	7.928401124	19.43732506
15:01:33.019	0.139222744	0.139222744	2.602662389	5.09009098	13.79831955	13.79831955	18.13484559	22.72634997	34.23535437	39.46471883	44.45860732	41.62352196	41.55173331	41.55173331	38.19137615	26.50383714	7.930584859	19.44063099
15:01:33.988	0.139306638	0.139306638	2.603569184	5.091572682	13.80133757	13.80133757	18.13876147	22.73122691	34.24264962	39.47298448	44.46768686	41.63204914	41.56024744	41.56024744	38.19854856	26.50831392	7.932731058	19.44387985
15:01:34.979	0.139392477	0.139392477	2.604496714	5.093088191	13.80442429	13.80442429	18.14276642	22.73621475	34.25011071	39.48143792	44.47697259	41.64076988	41.56895483	41.56895483	38.20588368	26.51289222	7.934926087	19.44720236
15:01:35.939	0.139475668	0.139475668	2.605395375	5.094556457	13.80741464	13.80741464	18.14664625	22.74104673	34.25733863	39.48962706	44.4859679	41.6492178	41.57738981	41.57738981	38.21298923	26.51732717	7.937052559	19.45042086
15:01:36.926	0.139561238	0.139561238	2.60631946	5.096066189	13.81048927	13.81048927	18.15063537	22.74601479	34.26477007	39.49804668	44.49521626	41.65790331	41.58606201	41.58606201	38.22029451	26.52188674	7.939238946	19.45372978
15:01:37.901	0.139645808	0.139645808	2.607232464	5.097557741	13.81352673	13.81352673	18.15457619	22.75092265	34.27211143	39.50636413	44.50435229	41.66648325	41.59462879	41.59462879	38.22751089	26.52639078	7.94139887	19.4569984
15:01:38.871	0.13972998	0.13972998	2.608140917	5.099041788	13.81654874	13.81654874	18.1584969	22.75580544	34.27941526	39.51463893	44.51344138	41.67501904	41.60315148	41.60315148	38.23469004	26.53087153	7.943547791	19.46025012
15:01:39.847	0.139814713	0.139814713	2.609055141	5.100535189	13.81958965	13.81958965	18.16244205	22.76071863	34.28676451	39.52296511	44.52258679	41.68360765	41.61172689	41.61172689	38.24191351	26.5353799	7.945710119	19.46352187
15:01:40.835	0.139900526	0.139900526	2.609980753	5.102047117	13.82266812	13.82266812	18.16643587	22.76569239	34.29420434	39.53139377	44.53184468	41.69230181	41.62040769	41.62040769	38.24922565	26.53994356	7.947899137	19.46683375
15:01:41.800	0.13998438	0.13998438	2.610884958	5.103524007	13.8256751	13.8256751	18.17033686	22.77055052	34.30147117	39.53962633	44.54088706	41.70079352	41.62888634	41.62888634	38.25636742	26.54440084	7.950037291	19.47006842
15:01:42.785	0.14007001	0.14007001	2.611808045	5.105031664	13.82874455	13.82874455	18.17431884	22.77550947	34.30888877	39.54802959	44.55011683	41.70946113	41.63754061	41.63754061	38.26365704	26.54895034	7.952219849	19.47337002
15:01:43.759	0.140154723	0.140154723	2.612720976	5.106522658	13.83177993	13.83177993	18.17825654	22.78041324	34.3162238	39.55633919	44.55924363	41.71803197	41.64609826	41.64609826	38.27086516	26.55344894	7.954378151	19.47663466
15:01:44.735	0.140239648	0.140239648	2.613635918	5.108016865	13.83482169	13.83482169	18.18220245	22.78532719	34.32357403	39.5646659	44.56838912	41.72662029	41.65467334	41.65467334	38.27808788	26.5579566	7.956540967	19.47990589
15:01:45.713	0.140324785	0.140324785	2.614552876	5.109514289	13.83786984	13.83786984	18.18615658	22.79025136	34.33093949	39.57300975	44.57755333	41.73522612	41.66326591	41.66326591	38.28532523	26.56247334	7.958708304	19.48318369
15:01:46.688	0.1404097	0.1404097	2.615467164	5.111007281	13.84090882	13.84090882	18.19009873	22.79516057	34.33828255	39.58132812	44.58668946	41.7438055	41.67183205	41.67183205	38.29254023	26.56697608	7.960869089	19.48645134
15:01:47.661	0.140494478	0.140494478	2.61637972	5.112497372	13.84394173	13.84394173	18.19403295	22.80005986	34.34561074	39.58962953	44.59580686	41.75236722	41.68038056	41.68038056	38.29974029	26.57146945	7.963025541	19.48971218
15:01:48.650	0.14058069	0.14058069	2.617307428	5.114012128	13.84702468	13.84702468	18.19803202	22.80503987	34.35305964	39.59806755	44.60507419	41.76106967	41.68906956	41.68906956	38.30705859	26.57603656	7.965217549	19.49302653
15:01:49.619	0.140665197	0.140665197	2.618216513	5.115496404	13.85004545	13.85004545	18.20195034	22.8099193	34.36035805	39.60633501	44.61415409	41.76959604	41.69758275	41.69758275	38.31422871	26.58051115	7.967365316	19.49627374
15:01:50.600	0.140750787	0.140750787	2.619136991	5.116999209	13.85310376	13.85310376	18.2059173	22.81485926	34.36774696	39.61470486	44.62334636	41.77822785	41.70620121	41.70620121	38.3214874	26.58504097	7.969539756	19.49956102
15:01:51.570	0.140835457	0.140835457	2.620047294	5.118485328	13.85612796	13.85612796	18.20983994	22.819744	34.37505325	39.62298101	44.63243561	41.78676284	41.714723	41.714723	38.32866458	26.58951987	7.971689919	19.50281134
15:01:52.554	0.140921387	0.140921387	2.620970872	5.119993046	13.85919596	13.85919596	18.21381932	22.82469935	34.38246511	39.63137664	44.64165598	41.7954209	41.72336764	41.72336764	38.33594514	26.59406324	7.973871195	19.50610845
15:01:53.523	0.141006044	0.141006044	2.621880502	5.121477921	13.86221732	13.86221732	18.21773813	22.82957925	34.38976409	39.63964429	44.65073569	41.8039468	41.73188033	41.73188033	38.34311448	26.59853715	7.976019288	19.50935514
15:01:54.505	0.141091876	0.141091876	2.622802484	5.122982887	13.8652794	13.8652794	18.22170969	22.8345248	34.39716123	39.64802301	44.65993729	41.81258708	41.74050721	41.74050721	38.35037988	26.60307097	7.978196308	19.51264531
15:01:55.472	0.141176434	0.141176434	2.623710512	5.124465003	13.86829484	13.86829484	18.22562069	22.83939489	34.40444546	39.65627374	44.66899821	41.8210952	41.74900213	41.74900213	38.35753406	26.60753533	7.980340141	19.51588507
15:01:56.458	0.141262692	0.141262692	2.624636528	5.125976403	13.8713697	13.8713697	18.22960868	22.84436083	34.41187302	39.66468669	44.67823719	41.82977044	41.75766389	41.75766389	38.36482867	26.61208727	7.982526195	19.51918838
15:01:57.422	0.141347063	0.141347063	2.625542013	5.127454225	13.87437608	13.87437608	18.23350779	22.84921607	34.41913496	39.67291195	44.68726995	41.83825197	41.76613224	41.76613224	38.37196029	26.61653746	7.984663547	19.52241784
15:01:58.409	0.141433484	0.141433484	2.626469236	5.128967449	13.87745433	13.87745433	18.23750005	22.85418724	34.42657027	39.68133346	44.69651812	41.8469357	41.77480247	41.77480247	38.37926182	26.62109364	7.986851965	19.52572421
15:01:59.384	0.141518893	0.141518893	2.627385322	5.130462424	13.8804953	13.8804953	18.24144388	22.85909808	34.43391531	39.68965261	44.70565379	41.85551371	41.78336713	41.78336713	38.38647437	26.62559423	7.989013854	19.52899025
15:02:00.361	0.141604516	0.141604516	2.628303427	5.131960622	13.88354267	13.88354267	18.24539593	22.86401913	34.44127559	39.69798891	44.71480818	41.86410924	41.79194927	41.79194927	38.39370154	26.63010391	7.991180267	19.53226287
15:03:16.028	0.148356834	0.148356834	2.699875569	5.2485333	14.12017395	14.12017395	18.55206886	23.24577447	35.01213901	40.34421923	45.42413635	42.52993401	42.45669623	42.45669623	38.95321309	26.97910259	8.159329853	19.78551447
15:03:17.013	0.148446379	0.148446379	2.700813969	5.250058861	14.12326443	14.12326443	18.55607145	23.25075557	35.01958593	40.35264504	45.43338056	42.53860886	42.46535637	42.46535637	38.96049856	26.98364539	8.161524965	19.78881079
15:03:17.991	0.148535328	0.148535328	2.701745868	5.251573779	14.1263332	14.1263332	18.56004585	23.25570153	35.0269803	40.36101128	45.4425593	42.54722222	42.4739551	42.4739551	38.96773227	26.98815588	8.163704627	19.79208366
15:03:18.960	0.148623502	0.148623502	2.702669367	5.253074973	14.129374	14.129374	18.56398398	23.26060232	35.03430707	40.36930094	45.45165392	42.55575657	42.48247494	42.48247494	38.97489952	26.9926249	8.165864404	19.79532643
15:03:19.945	0.148713173	0.148713173	2.703608288	5.254601163	14.13246528	14.13246528	18.5679874	23.26558433	35.04175525	40.37772784	45.46089899	42.56443206	42.49113565	42.49113565	38.98218519	26.99716772	8.168060007	19.79862274
15:03:20.914	0.14880143	0.14880143	2.704532128	5.256102768	14.13550661	14.13550661	18.57192607	23.27048572	35.04908284	40.38601822	45.46999416	42.57296683	42.49965586	42.49965586	38.98935257	27.00163674	8.170220104	19.80186551
15:03:21.893	0.14889064	0.14889064	2.705465666	5.257620067	14.13857956	14.13857956	18.57590563	23.27543796	35.05648641	40.39439444	45.47918341	42.58158983	42.50826413	42.50826413	38.99659393	27.00615186	8.172402641	19.80514172
15:03:22.863	0.14897907	0.14897907	2.706390787	5.259123614	14.1416245	14.1416245	18.57984886	23.28034494	35.06382227	40.40269397	45.4882884	42.5901337	42.51679339	42.51679339	39.00376874	27.01062545	8.174565258	19.80838779
15:03:23.849	0.149069002	0.149069002	2.70733135	5.260652185	14.14471997	14.14471997	18.58385744	23.28533322	35.07127963	40.41113083	45.49754395	42.5988188	42.52546361	42.52546361	39.01106203	27.01517288	8.176763732	19.81168743
15:03:24.825	0.149158064	0.149158064	2.708262539	5.262165452	14.14778428	14.14778428	18.58782561	23.29027118	35.07866172	40.41948243	45.50670585	42.60741597	42.53404603	42.53404603	39.01828136	27.01967416	8.178940056	19.81495358
15:03:25.793	0.149246437	0.149246437	2.70918626	5.263666512	14.15082372	14.15082372	18.59176151	23.29516893	35.08598365	40.42776589	45.51579287	42.61594282	42.54255823	42.54255823	39.02544154	27.02413852	8.181098688	19.81819294
15:03:26.779	0.149336496	0.149336496	2.710127324	5.265195682	14.15391991	14.15391991	18.59577084	23.30015803	35.0934421	40.43620367	45.52504908	42.62462838	42.55122884	42.55122884	39.03273488	27.02868588	8.183297607	19.82149251
15:03:27.760	0.14942614	0.14942614	2.711063792	5.266717312	14.15700068	14.15700068	18.59976013	23.30512215	35.10086316	40.44459904	45.53425866	42.63327012	42.5598557	42.5598557	39.03999131	27.03321018	8.185485543	19.82477536
15:03:28.726	0.149514454	0.149514454	2.711986096	5.268215856	14.16003455	14.16003455	18.60368863	23.31001059	35.10817104	40.45286628	45.54332756	42.6417798	42.56835069	42.56835069	39.04713674	27.03766525	8.18764015	19.82800796
15:03:29.717	0.149605097	0.149605097	2.712932445	5.269753398	14.16314722	14.16314722	18.60771909	23.31502585	35.11566848	40.46134784	45.55263146	42.65050994	42.57706575	42.57706575	39.05446717	27.04223562	8.189850687	19.83132423
15:03:30.683	0.149693494	0.149693494	2.713855086	5.271252349	14.1661816	14.1661816	18.61164812	23.31991488	35.12297714	40.46961575	45.56170088	42.65902	42.58556108	42.58556108	39.0616127	27.04669068	8.192005606	19.83455681
15:03:31.669	0.149783763	0.149783763	2.714796991	5.272782527	14.16927904	14.16927904	18.61565872	23.32490537	35.13043745	40.47805511	45.57095824	42.66770637	42.59423239	42.59423239	39.06890615	27.05123794	8.194205279	19.83785629
15:03:32.641	0.149872793	0.149872793	2.71572569	5.274291179	14.17233274	14.17233274	18.61961264	23.32982529	35.13779221	40.48637496	45.58008441	42.67626958	42.60278073	42.60278073	39.07609607	27.05572061	8.196373871	19.8411089
15:03:33.617	0.14996223	0.14996223	2.716658375	5.275806236	14.17539925	14.17539925	18.62358308	23.33476572	35.1451776	40.49472934	45.58924834	42.68486816	42.61136437	42.61136437	39.08331559	27.0602217	8.198551531	19.84437487
15:03:34.588	0.150051249	0.150051249	2.717586442	5.277313721	14.17845028	14.17845028	18.6275334	23.33968109	35.15252547	40.50304119	45.5983655	42.69342282	42.61990413	42.61990413	39.09049812	27.06469969	8.200718172	19.84762408
15:03:35.562	0.150140586	0.150140586	2.718517547	5.278826068	14.18151099	14.18151099	18.6314962	23.34461194	35.15989644	40.51137906	45.6075111	42.7020041	42.62847045	42.62847045	39.09770289	27.06919152	8.202891665	19.85088332
15:03:36.537	0.150230055	0.150230055	2.719449764	5.280340152	14.18457506	14.18457506	18.63546328	23.34954809	35.16727528	40.51972572	45.61666623	42.71059427	42.63704562	42.63704562	39.104915	27.0736879	8.205067517	19.85414586
15:03:37.522	0.150320484	0.150320484	2.72039171	5.281869968	14.1876708	14.1876708	18.63947131	23.35453514	35.17473017	40.52815831	45.62591548	42.71927271	42.64570888	42.64570888	39.11220111	27.07823037	8.207265837	19.85744184
15:03:38.486	0.150409026	0.150409026	2.721313729	5.283367347	14.19070075	14.19070075	18.64339409	23.35941609	35.1820264	40.53641133	45.63496767	42.72776619	42.65418748	42.65418748	39.11933183	27.08267593	8.209417411	19.8606675
15:03:39.471	0.150499537	0.150499537	2.722255994	5.284897538	14.19379693	14.19379693	18.64740255	23.36440361	35.18948191	40.5448444	45.64421722	42.7364448	42.66285086	42.66285086	39.12661786	27.08721829	8.211615993	19.86396338
15:03:40.441	0.150588713	0.150588713	2.723184078	5.286404627	14.19684621	14.19684621	18.65135023	23.36931546	35.19682425	40.55314937	45.65332616	42.74499143	42.67138247	42.67138247	39.13379297	27.09169146	8.213781245	19.86720907
15:03:41.427	0.150679399	0.150679399	2.724127624	5.287936753	14.19994599	14.19994599	18.65536322	23.37430854	35.20428796	40.56159151	45.66258544	42.75367906	42.68005481	42.68005481	39.14108634	27.09623833	8.21598233	19.87050822
15:03:42.407	0.150769577	0.150769577	2.725065598	5.28945976	14.20302716	14.20302716	18.65935205	23.37927151	35.21170664	40.56998261	45.67178861	42.762314	42.68867453	42.68867453	39.14833536	27.10075752	8.218170174	19.87378728
15:03:43.375	0.150858691	0.150858691	2.72599224	5.290964298	14.20607081	14.20607081	18.66329225	23.38417394	35.21903476	40.57827117	45.68087922	42.77084327	42.69718874	42.69718874	39.15549556	27.10522131	8.220331352	19.87702613
15:03:44.346	0.150948122	0.150948122	2.72692192	5.292473697	14.20912413	14.20912413	18.6672449	23.38909184	35.22638595	40.58658574	45.68999823	42.77939915	42.70572948	42.70572948	39.16267799	27.10969891	8.222499377	19.88027501
15:03:45.331	0.151038883	0.151038883	2.727865151	5.294005026	14.21222166	14.21222166	18.67125472	23.39408081	35.23384334	40.59502031	45.69924874	42.78807834	42.71439331	42.71439331	39.16996382	27.11424095	8.22469876	19.88357064
15:03:46.313	0.15112941	0.15112941	2.72880568	5.295531896	14.21531	14.21531	18.67525258	23.39905488	35.24127841	40.60342952	45.70847132	42.79673129	42.7230309	42.7230309	39.1772275	27.11876915	8.226891601	19.88685622
15:03:47.281	0.151218686	0.151218686	2.72973295	5.297037173	14.21835452	14.21835452	18.67919364	23.40395823	35.24860773	40.61171903	45.7175625	42.8052609	42.73154536	42.73154536	39.18438754	27.1232327	8.229053294	19.89009489
15:03:48.251	0.151308187	0.151308187	2.730662289	5.298545737	14.22140552	14.22140552	18.68314304	23.40887192	35.25595245	40.62002586	45.72667258	42.81380819	42.74007743	42.74007743	39.1915623	27.12770541	8.231219571	19.89334019
15:03:49.236	0.151399115	0.151399115	2.731606164	5.300077827	14.22450395	14.22450395	18.68715376	23.41386187	35.26341111	40.62846145	45.73592373	42.82248779	42.74874156	42.74874156	39.19884801	27.13224725	8.233419494	19.89663565
15:03:50.219	0.151489899	0.151489899	2.732548279	5.301606987	14.22759628	14.22759628	18.69115654	23.41884189	35.27085489	40.6368801	45.7451562	42.83114981	42.75738812	42.75738812	39.20611885	27.13677978	8.235615068	19.89992436
15:03:51.187	0.151579338	0.151579338	2.733476171	5.303112992	14.23064164	14.23064164	18.69509844	23.42374613	35.27818536	40.64517049	45.7542479	42.83967971	42.76590276	42.76590276	39.21327867	27.14124308	8.23777726	19.90316282
15:03:52.160	0.151669279	0.151669279	2.734409012	5.304626961	14.23370294	14.23370294	18.69906091	23.42867594	35.28555398	40.65350394	45.7633867	42.84825375	42.77446144	42.77446144	39.22047543	27.14572937	8.23995075	19.90641797
15:03:53.149	0.151760741	0.151760741	2.735357342	5.306165994	14.23681477	14.23681477	18.70308872	23.43368698	35.29304399	40.66197455	45.77267581	42.85696876	42.78316081	42.78316081	39.2277904	27.15028932	8.242160082	19.90972655
15:03:54.113	0.151849931	0.151849931	2.736281859	5.307666312	14.23984815	14.23984815	18.70701493	23.4385716	35.30034498	40.67023131	45.78173027	42.86546358	42.79164036	42.79164036	39.23492044	27.15473396	8.244313702	19.91295146
15:03:55.092	0.15194055	0.15194055	2.737220919	5.309190161	14.24292896	14.24292896	18.71100246	23.44353246	35.30775988	40.67861677	45.79092577	42.87409067	42.80025192	42.80025192	39.24216138	27.15924771	8.246500961	19.91622651
15:03:56.066	0.152030747	0.152030747	2.738155328	5.310706392	14.2459942	14.2459942	18.71496978	23.44846814	35.31513711	40.68695954	45.80007433	42.88267366	42.80881944	42.80881944	39.2493652	27.16373828	8.248677149	19.91948474
15:03:57.051	0.152122003	0.152122003	2.739100452	5.312239939	14.24909429	14.24909429	18.71898214	23.45345982	35.32259797	40.69539677	45.80932636	42.89135369	42.81748379	42.81748379	39.25665034	27.16827952	8.25087805	19.92277972
15:03:58.026	0.152212374	0.152212374	2.740036129	5.313758085	14.25216309	14.25216309	18.72295394	23.45840099	35.32998331	40.70374849	45.8184845	42.89994559	42.82606014	42.82606014	39.2638614	27.17277454	8.253056709	19.92604117
15:03:59.011	0.152303713	0.152303713	2.740981557	5.315291982	14.25526356	14.25526356	18.72696667	23.46339305	35.33744465	40.71218606	45.82773667	42.90862564	42.83472447	42.83472447	39.27114633	27.17731558	8.255257834	19.92933601
15:03:59.979	0.152393515	0.152393515	2.741910818	5.316799579	14.25831072	14.25831072	18.73091033	23.46829914	35.34477746	40.72047818	45.83682923	42.91715591	42.84323925	42.84323925	39.27830544	27.18177816	8.257421081	19.93257391
15:05:15.401	0.159512513	0.159512513	2.814759085	5.434773929	14.4962787	14.4962787	19.0387035	23.85108978	35.91675759	41.3669795	46.54537631	43.58175577	43.50654303	43.50654303	39.83571913	27.5291593	8.426283688	20.18460663
15:05:16.378	0.159606313	0.159606313	2.815708426	5.436308627	14.49936812	14.49936812	19.04269705	23.85605486	35.92417454	41.37535886	46.55455506	43.59036372	43.5151329	43.5151329	39.84293404	27.53365476	8.428474952	20.18786799
15:05:17.355	0.159700155	0.159700155	2.816657929	5.437843518	14.50245777	14.50245777	19.04669084	23.86102019	35.93159181	41.3837385	46.56373398	43.5989718	43.52372285	43.52372285	39.85014894	27.5381502	8.430666354	20.19112931
15:05:18.324	0.15979327	0.15979327	2.817599805	5.439366011	14.5055223	14.5055223	19.05065211	23.86594505	35.93894858	41.39204967	46.5728378	43.6075094	43.53224245	43.53224245	39.85730465	27.54260874	8.432839919	20.19436386
15:05:19.294	0.159886522	0.159886522	2.8185428	5.440890248	14.50859019	14.50859019	19.05461766	23.87087519	35.94631316	41.40036958	46.58195105	43.61605583	43.54077081	43.54077081	39.86446763	27.54707179	8.435015834	20.19760169
15:05:20.287	0.159982027	0.159982027	2.819508318	5.442450818	14.51173104	14.51173104	19.05867746	23.87592246	35.95385268	41.40888702	46.59128054	43.62480501	43.54950146	43.54950146	39.87180041	27.55164062	8.437243476	20.20091624
15:05:21.252	0.160074881	0.160074881	2.820446762	5.44396756	14.51478353	14.51478353	19.06262298	23.88082762	35.96117985	41.41716447	46.60034704	43.63330753	43.55798593	43.55798593	39.87892634	27.55608055	8.439408419	20.20413728
15:05:22.240	0.160169989	0.160169989	2.821407727	5.445520633	14.51790897	14.51790897	19.06666274	23.8858499	35.96868192	41.42563939	46.60962971	43.64201273	43.56667262	43.56667262	39.88622202	27.56062622	8.441625078	20.20743502
15:05:23.199	0.160262347	0.160262347	2.822340637	5.447028297	14.52094287	14.52094287	19.07058413	23.89072498	35.97596404	41.43386576	46.61864001	43.65046248	43.57510436	43.57510436	39.89330348	27.56503841	8.443776791	20.21063592
15:05:24.190	0.160357829	0.160357829	2.823304834	5.448586456	14.52407822	14.52407822	19.07463658	23.89576295	35.98348944	41.44236684	46.62795108	43.65919425	43.58381749	43.58381749	39.90062117	27.56959776	8.446000427	20.21394357
15:05:25.166	0.160451908	0.160451908	2.824254596	5.450121217	14.52716633	14.52716633	19.07862791	23.90072491	35.99090122	41.45073949	46.63712135	43.66779395	43.59239879	43.59239879	39.90782804	27.57408806	8.448190534	20.21720112
15:05:26.142	0.160546028	0.160546028	2.825204513	5.451656161	14.53025465	14.53025465	19.08261946	23.90568708	35.99831328	41.45911234	46.64629172	43.67639371	43.60098011	43.60098011	39.91503485	27.57857829	8.450380762	20.22045862
15:05:27.111	0.160639516	0.160639516	2.826147776	5.453180284	14.53332104	14.53332104	19.0865826	23.91061391	36.00567248	41.4674254	46.65539646	43.68493191	43.60949996	43.60949996	39.92218993	27.58303628	8.452555414	20.22369273
15:05:28.102	0.160735168	0.160735168	2.827112615	5.4547392	14.53645727	14.53645727	19.09063594	23.91565283	36.01319906	41.47592743	46.66470805	43.69366404	43.61821329	43.61821329	39.92950741	27.58759543	8.454779567	20.22700022
15:05:29.062	0.16082787	0.16082787	2.828047428	5.456249536	14.5394956	14.5394956	19.09456272	23.92053436	36.0204905	41.48416374	46.6737285	43.70212312	43.62665412	43.62665412	39.93659595	27.59201192	8.456934273	20.2302042
15:05:30.042	0.160922545	0.160922545	2.829001875	5.457791525	14.54259745	14.54259745	19.09857152	23.92551782	36.02793414	41.49257188	46.68293701	43.71075852	43.63527085	43.63527085	39.94383212	27.59652038	8.459133998	20.2334749
15:05:31.023	0.16101736	0.16101736	2.82995746	5.459335283	14.5457027	14.5457027	19.10258465	23.93050664	36.03538571	41.50098888	46.69215509	43.71940287	43.64389647	43.64389647	39.95107566	27.60103341	8.461336107	20.23674892
15:05:32.003	0.16111212	0.16111212	2.830912222	5.460877645	14.54880499	14.54880499	19.10659389	23.93549056	36.04282992	41.50939747	46.70136383	43.72803843	43.65251329	43.65251329	39.95831171	27.60554176	8.463536083	20.24001953
15:05:32.976	0.161206246	0.161206246	2.831860338	5.462409201	14.55188537	14.55188537	19.11057478	23.9404392	36.05022137	41.51774637	46.71050708	43.73661254	43.66106875	43.66106875	39.96549615	27.61001793	8.465720509	20.24326679
15:05:33.953	0.161300802	0.161300802	2.832812511	5.463947243	14.55497864	14.55497864	19.11457225	23.94540843	36.05764351	41.52612984	46.71968806	43.74522201	43.66965945	43.66965945	39.97271008	27.61451246	8.467914046	20.24652737
15:05:34.928	0.161395206	0.161395206	2.833762895	5.465482325	14.5580658	14.5580658	19.11856178	23.95036772	36.06505077	41.5344964	46.72885039	43.75381396	43.67823263	43.67823263	39.9799092	27.61899776	8.470103223	20.24978123
15:05:35.902	0.161489556	0.161489556	2.83471247	5.467016034	14.56115004	14.56115004	19.12254747	23.95532222	36.07245079	41.54285469	46.73800354	43.76239727	43.68679715	43.68679715	39.98710096	27.62347845	8.472290304	20.25303176
15:05:36.889	0.161585208	0.161585208	2.83567488	5.468570405	14.56427567	14.56427567	19.12658659	23.96034308	36.07994989	41.55132479	46.747279	43.77109524	43.69547604	43.69547604	39.99438867	27.6280189	8.474506708	20.25632563
15:05:37.856	0.161678965	0.161678965	2.836617954	5.470093478	14.56733821	14.56733821	19.13054411	23.96526248	36.08729738	41.55962356	46.75636672	43.77961713	43.7039792	43.7039792	40.00152872	27.63246734	8.476678346	20.25955274
15:05:38.842	0.161774606	0.161774606	2.837579718	5.471646668	14.57046114	14.57046114	19.13457962	23.97027878	36.09478955	41.56808563	46.76563314	43.78830657	43.7126495	43.7126495	40.00880902	27.63700314	8.478892785	20.26284323
15:05:39.805	0.16186806	0.16186806	2.838519222	5.473163841	14.57351149	14.57351149	19.1385213	23.9751784	36.10210738	41.57635071	46.7746837	43.79679357	43.72111776	43.72111776	40.01591958	27.64143318	8.481055737	20.26605698
15:05:40.795	0.161964177	0.161964177	2.83948523	5.474723745	14.5766476	14.5766476	19.14257372	23.98021563	36.10963071	41.58484777	46.78398818	43.80551863	43.72982352	43.72982352	40.02322948	27.64598738	8.483279467	20.26936081
15:05:41.766	0.162058492	0.162058492	2.840432862	5.476253909	14.57972375	14.57972375	19.14654862	23.98515647	36.11700999	41.59318206	46.79311428	43.8140764	43.73836232	43.73836232	40.03039908	27.65045417	8.485460662	20.27260121
15:05:42.737	0.162152851	0.162152851	2.841380668	5.477784286	14.58280018	14.58280018	19.15052381	23.99009762	36.12438969	41.60151672	46.80224066	43.82263441	43.74690132	43.74690132	40.03756876	27.65492099	8.487642023	20.27584163
15:05:43.713	0.162247738	0.162247738	2.842333518	5.479322738	14.58589268	14.58589268	19.15451971	23.99506448	36.13180772	41.60989458	46.81141422	43.83123663	43.75548439	43.75548439	40.04477535	27.6594108	8.489834756	20.27909872
15:05:44.703	0.162344031	0.162344031	2.843300207	5.480883467	14.58902979	14.58902979	19.1585732	24.00010288	36.13933255	41.61839296	46.82071961	43.83996243	43.76419073	43.76419073	40.05208535	27.66396501	8.492059097	20.28240253
15:05:45.674	0.162438517	0.162438517	2.8442485	5.482414426	14.59210691	14.59210691	19.16254911	24.00504481	36.14671324	41.62672845	46.82984652	43.84852084	43.77273001	43.77273001	40.05925498	27.66843176	8.494240872	20.28564288
15:05:46.645	0.162533048	0.162533048	2.845196982	5.483945624	14.59518435	14.59518435	19.16652538	24.00998714	36.15409447	41.63506446	46.83897387	43.85707965	43.78126964	43.78126964	40.06642482	27.67289862	8.496422849	20.28888331
15:05:47.619	0.162627915	0.162627915	2.846148562	5.485481754	14.59827154	14.59827154	19.1705142	24.01494503	36.16149888	41.64342655	46.84812964	43.86566507	43.7898358	43.7898358	40.07361683	27.67737928	8.498611717	20.29213374
15:05:48.604	0.162723895	0.162723895	2.847111048	5.487035424	14.60139382	14.60139382	19.17454829	24.01995915	36.16898721	41.65188331	46.85738895	43.87434756	43.79849875	43.79849875	40.08089002	27.6819105	8.500825436	20.29542085
15:05:49.569	0.162817971	0.162817971	2.848054173	5.48855777	14.60445299	14.60445299	19.1785008	24.02487182	36.17632397	41.66016882	46.86646062	43.88285406	43.80698608	43.80698608	40.08801567	27.68634978	8.502994388	20.29864126
15:05:50.555	0.162914139	0.162914139	2.849017997	5.490113461	14.60757901	14.60757901	19.1825396	24.02989171	36.18382082	41.668635	46.87572998	43.89154592	43.8156583	43.8156583	40.09529645	27.69088571	8.505210706	20.30193176
15:05:51.531	0.163009374	0.163009374	2.849972215	5.491653579	14.61067358	14.61067358	19.18653772	24.03486099	36.19124201	41.67701566	46.88490556	43.90014981	43.82424272	43.82424272	40.10250342	27.69537563	8.5074047	20.30518889
15:05:52.504	0.16310436	0.16310436	2.850923666	5.493189162	14.61375887	14.61375887	19.19052379	24.03981527	36.19864073	41.68537085	46.89405314	43.90872742	43.83280086	43.83280086	40.10968825	27.69985174	8.509592093	20.30843599
15:05:53.484	0.163200074	0.163200074	2.851882142	5.494736017	14.61686666	14.61686666	19.19453887	24.04480555	36.20609316	41.69378658	46.90326688	43.91736704	43.84142084	43.84142084	40.11692488	27.70436012	8.511795404	20.3117065
15:05:54.461	0.163295539	0.163295539	2.852837864	5.496278358	14.61996521	14.61996521	19.19854196	24.04978089	36.21352322	41.70217697	46.91245274	43.92598048	43.85001466	43.85001466	40.12413947	27.70885474	8.513992145	20.31496702
15:05:55.431	0.163390365	0.163390365	2.853786916	5.497809868	14.62304184	14.62304184	19.20251668	24.05472092	36.22090051	41.71050767	46.92157311	43.9345325	43.85854715	43.85854715	40.13130247	27.71331722	8.516173321	20.31820422
15:05:56.417	0.163486798	0.163486798	2.854751788	5.499366839	14.62616946	14.62616946	19.20655721	24.05974271	36.22839982	41.71897606	46.9308441	43.94322573	43.86722049	43.86722049	40.13858362	27.71785329	8.518390619	20.32149479
15:05:57.394	0.163582396	0.163582396	2.855708042	5.500909834	14.62926885	14.62926885	19.2105612	24.06471906	36.2358312	41.72736765	46.94003088	43.95183996	43.87581497	43.87581497	40.14579848	27.72234804	8.520587873	20.32475539
15:05:58.375	0.16367843	0.16367843	2.85666838	5.502459351	14.63238117	14.63238117	19.21458186	24.06971606	36.24329338	41.73579392	46.9492555	43.96048965	43.88444478	43.88444478	40.1530429	27.7268612	8.522794274	20.32802934
15:05:59.340	0.163772941	0.163772941	2.857613235	5.50398382	14.63544303	14.63544303	19.21853725	24.07463192	36.25063433	41.7440832	46.95833002	43.96899857	43.8929341	43.8929341	40.1601693	27.73130082	8.524964872	20.33124993
15:06:00.326	0.163869554	0.163869554	2.858578839	5.505541698	14.63857182	14.63857182	19.22257907	24.07965515	36.25813555	41.75255336	46.96760242	43.97769301	43.90160848	43.90160848	40.16745094	27.73583714	8.527182898	20.33454067
15:07:15.976	0.171411323	0.171411323	2.933139317	5.625630165	14.8792639	14.8792639	19.53333949	24.46574418	36.83449759	42.40307924	47.67933618	44.64500169	44.56723719	44.56723719	40.7259232	28.08372636	8.697732303	20.58688803
15:07:16.959	0.171510938	0.171510938	2.934113627	5.627196769	14.88239747	14.88239747	19.53738313	24.47076632	36.84199222	42.41153461	47.68858173	44.65366954	44.57588126	44.57588126	40.73317199	28.08824163	8.699951649	20.59016302
15:07:17.940	0.171610391	0.171610391	2.935086091	5.628760338	14.88552479	14.88552479	19.54141868	24.47577836	36.84947171	42.41997281	47.69780836	44.66231964	44.58450758	44.58450758	40.74040581	28.09274757	8.702166554	20.59343123
15:07:18.912	0.171708974	0.171708974	2.936049782	5.630309734	14.88862362	14.88862362	19.54541739	24.48074461	36.8568828	42.42833375	47.70695037	44.6708904	44.59305472	44.59305472	40.74757313	28.09721209	8.704361243	20.59666939
15:07:19.891	0.171808308	0.171808308	2.937020553	5.631870448	14.89174491	14.89174491	19.54944505	24.48574677	36.8643474	42.43675497	47.71615816	44.67952281	44.60166329	44.60166329	40.75479188	28.10170864	8.706571822	20.59993078
15:07:20.872	0.171907887	0.171907887	2.937993458	5.633434526	14.89487277	14.89487277	19.55348113	24.49075934	36.87182748	42.44519356	47.72538479	44.68817288	44.61028942	44.61028942	40.76202525	28.1062143	8.708787025	20.60319876
15:07:21.839	0.172006086	0.172006086	2.938952615	5.634976438	14.89795615	14.89795615	19.55745975	24.49570051	36.87920094	42.45351178	47.73447968	44.69669943	44.61879232	44.61879232	40.7691552	28.11065553	8.710970695	20.60642001
15:07:22.828	0.172106563	0.172106563	2.939933746	5.636553607	14.90110986	14.90110986	19.56152908	24.50075429	36.88674238	42.46201941	47.74378152	44.70541999	44.62748863	44.62748863	40.77644723	28.11519772	8.713204154	20.60971449
15:07:23.803	0.172205659	0.172205659	2.940901134	5.638108618	14.90421911	14.90421911	19.56554098	24.5057367	36.89417725	42.47040673	47.75295168	44.71401709	44.63606177	44.63606177	40.78363589	28.11967553	8.715406094	20.61296225
15:07:24.780	0.172305	0.172305	2.941870656	5.639666994	14.90733492	14.90733492	19.5695613	24.51072952	36.9016276	42.47881141	47.76214069	44.72263185	44.64465247	44.64465247	40.79083918	28.12416244	8.717612657	20.61621662
15:07:25.755	0.17240418	0.17240418	2.942838338	5.641222346	14.91044452	14.91044452	19.57357356	24.51571229	36.90906287	42.487199	47.77131086	44.73122894	44.6532255	44.6532255	40.79802756	28.12864006	8.719814799	20.61946424
15:07:26.735	0.172503912	0.172503912	2.943811136	5.642785855	14.91357028	14.91357028	19.5776066	24.52072083	36.91653653	42.4956298	47.78052814	44.73987019	44.6618425	44.6618425	40.80525271	28.1331406	8.72202835	20.62272847
15:07:27.702	0.172602362	0.172602362	2.944771175	5.644328792	14.91665474	14.91665474	19.58158632	24.5256631	36.92391124	42.5039489	47.78962315	44.74839679	44.67034513	44.67034513	40.81238188	28.13758134	8.724212636	20.62594933
15:07:28.683	0.172702281	0.172702281	2.945745268	5.645894251	14.91978407	14.91978407	19.58562387	24.53067715	36.93139299	42.51238864	47.79884993	44.75704693	44.67897089	44.67897089	40.81961419	28.14208632	8.726428667	20.62921677
15:07:29.657	0.172801529	0.172801529	2.946712566	5.647448723	14.92289127	14.92289127	19.58963282	24.53565564	36.9388216	42.52076837	47.80801095	44.7656354	44.68753511	44.68753511	40.82679481	28.14655911	8.728629002	20.63246086
15:07:30.644	0.172902145	0.172902145	2.947692927	5.649024121	14.92604014	14.92604014	19.59369547	24.54070078	36.94634961	42.52926011	47.81729429	44.77433854	44.69621361	44.69621361	40.83407115	28.15109152	8.730858817	20.63574819
15:07:31.616	0.173001275	0.173001275	2.948658542	5.650575758	14.92914136	14.92914136	19.59769659	24.54566945	36.95376345	42.537623	47.82643661	44.78290947	44.70476023	44.70476023	40.84123683	28.155555	8.733054859	20.63898551
15:07:32.591	0.173100753	0.173100753	2.949627282	5.652132349	14.93225231	14.93225231	19.60171023	24.55065363	36.96120036	42.5460118	47.83560714	44.79150683	44.71333315	44.71333315	40.84842446	28.16003215	8.735257774	20.64223274
15:07:33.555	0.173199153	0.173199153	2.950585264	5.65367159	14.93532844	14.93532844	19.60567888	24.5555819	36.96855377	42.55430635	47.84467448	44.80000744	44.72180955	44.72180955	40.85553108	28.16445883	8.737435998	20.64544337
15:07:34.548	0.173300556	0.173300556	2.951572224	5.655257325	14.93849731	14.93849731	19.60976713	24.56065865	36.97612867	42.56285063	47.85401469	44.80876385	44.73054096	44.73054096	40.8628514	28.16901864	8.739679872	20.64875054
15:07:35.516	0.173399449	0.173399449	2.952534486	5.656803312	14.94158659	14.94158659	19.61375265	24.56560779	36.98351309	42.57117996	47.86311979	44.81729984	44.73905253	44.73905253	40.86998732	28.17346357	8.741867361	20.65197439
15:07:36.503	0.173500328	0.173500328	2.953515799	5.65837984	14.94473675	14.94473675	19.61781665	24.57065432	36.99104277	42.57967305	47.87240376	44.82600351	44.74773125	44.74773125	40.87726328	28.17799572	8.744097924	20.65526149
15:07:37.474	0.173599614	0.173599614	2.954481363	5.659931001	14.94783605	14.94783605	19.62181499	24.57561929	36.99845068	42.58802871	47.88153735	44.83456619	44.75626933	44.75626933	40.88442124	28.18245438	8.746292455	20.65849529
15:07:38.441	0.173698534	0.173698534	2.955443105	5.661475957	14.9509228	14.9509228	19.62579708	24.58056404	37.00582835	42.59635017	47.89063344	44.8430937	44.76477229	44.76477229	40.89154966	28.18689463	8.74847807	20.66171572
15:07:39.411	0.173797805	0.173797805	2.956408002	5.663025917	14.95401939	14.95401939	19.62979181	24.58552445	37.01322932	42.60469782	47.89975801	44.8516479	44.77330181	44.77330181	40.89870026	28.1913487	8.750670626	20.66494618
15:07:40.403	0.173899372	0.173899372	2.957394943	5.664611219	14.95718642	14.95718642	19.63387737	24.59059758	37.02079842	42.61323501	47.90908962	44.86039618	44.78202481	44.78202481	40.90601297	28.19590373	8.752913032	20.66824985
15:07:41.367	0.173998116	0.173998116	2.958354192	5.666151975	14.9602643	14.9602643	19.63784787	24.59552781	37.02815422	42.62153154	47.91815804	44.86889772	44.79050172	44.79050172	40.91311928	28.2003302	8.75509229	20.67146028
15:07:42.352	0.174099054	0.174099054	2.959334496	5.667726483	14.96340944	14.96340944	19.64190508	24.60056567	37.03567054	42.63000903	47.92742411	44.87758455	44.79916333	44.79916333	40.92038034	28.20485306	8.757319146	20.67474061
15:07:43.329	0.174199219	0.174199219	2.960307015	5.669288422	14.96652932	14.96652932	19.64592964	24.60556294	37.04312625	42.63841807	47.93661522	44.88620108	44.80775481	44.80775481	40.92758251	28.20933923	8.759528084	20.67799433
15:07:44.304	0.174299222	0.174299222	2.961277704	5.670847356	14.96964303	14.96964303	19.64994621	24.61055023	37.050567	42.64681014	47.94578766	44.8948001	44.81632877	44.81632877	40.9347699	28.21381619	8.761732632	20.68124136
15:07:45.283	0.17439968	0.17439968	2.962252548	5.672412897	14.97276978	14.97276978	19.65397953	24.6155583	37.05803867	42.655237	47.95499797	44.90343461	44.82493807	44.82493807	40.94198683	28.21831155	8.763946381	20.68450172
15:07:46.259	0.174499875	0.174499875	2.963224575	5.673973847	14.9758872	14.9758872	19.65800076	24.62055131	37.06548782	42.66363836	47.96418029	44.91204287	44.83352115	44.83352115	40.94918167	28.22279314	8.766153499	20.68775211
15:07:47.244	0.174601039	0.174601039	2.964205738	5.675549402	14.97903363	14.97903363	19.66205936	24.62559067	37.07300604	42.67211755	47.97344752	44.92073072	44.84218353	44.84218353	40.95644291	28.22731608	8.768381127	20.69103247
15:07:48.208	0.174700091	0.174700091	2.965166153	5.677091574	14.98211323	14.98211323	19.66603171	24.63052289	37.08036437	42.68041631	47.98251742	44.92923356	44.8506614	44.8506614	40.96354938	28.23174263	8.770561416	20.69424292
15:07:49.193	0.174801346	0.174801346	2.966147666	5.678667557	14.98526019	14.98526019	19.67009088	24.63556288	37.0878834	42.68889623	47.99178518	44.93792188	44.85932414	44.85932414	40.97081074	28.23626563	8.772789366	20.69752332
15:07:50.163	0.174901103	0.174901103	2.967114397	5.680219741	14.98835946	14.98835946	19.6740885	24.6405264	37.09528828	42.69724731	48.00091199	44.94647805	44.86785509	44.86785509	40.97796152	28.24071976	8.774983531	20.70075376
15:07:51.148	0.175002449	0.175002449	2.968096259	5.681796153	14.99150695	14.99150695	19.67814826	24.64556703	37.10280812	42.70572796	48.01018027	44.95516683	44.8765182	44.8765182	40.985223	28.24524283	8.777211804	20.7040342
15:07:52.122	0.175102708	0.175102708	2.969067325	5.683355165	14.99461954	14.99461954	19.68216294	24.65055165	37.11024435	42.71411423	48.01934525	44.96375876	44.88508471	44.88508471	40.9924034	28.2497154	8.77941534	20.70727801
15:07:53.093	0.175202704	0.175202704	2.970035589	5.684909612	14.99772286	14.99772286	19.68616562	24.65552131	37.1176582	42.72247517	48.02848243	44.97232461	44.89362516	44.89362516	40.99956188	28.2541743	8.781612286	20.7105119
15:07:54.073	0.175303671	0.175303671	2.971012987	5.686478658	15.00085516	15.00085516	19.69020562	24.66053729	37.12514106	42.73091385	48.03770443	44.98096996	44.90224483	44.90224483	41.00678666	28.2586745	8.783829725	20.71377574
15:07:55.055	0.175404892	0.175404892	2.971992575	5.688051152	15.00399419	15.00399419	19.69425424	24.66556391	37.13263975	42.73937028	48.04694568	44.98963336	44.91088244	44.91088244	41.01402639	28.263184	8.786051893	20.71704632
15:07:56.026	0.175505024	0.175505024	2.972961364	5.689606245	15.00709832	15.00709832	19.6982578	24.67053455	37.14005485	42.74773237	48.0560837	44.99819996	44.9194235	44.9194235	41.02118511	28.26764303	8.788249334	20.72028029
15:07:57.001	0.175605614	0.175605614	2.97393432	5.691167963	15.01021551	15.01021551	19.70227815	24.675526	37.14750093	42.7561293	48.06525967	45.00680212	44.92799996	44.92799996	41.0283734	28.27212048	8.790455995	20.72352762
15:07:57.982	0.17570687	0.17570687	2.974913455	5.692739531	15.01335221	15.01335221	19.7063236	24.68054856	37.15499336	42.76457841	48.07449251	45.01545759	44.93662952	44.93662952	41.03560611	28.27662559	8.792676433	20.726795
15:07:58.962	0.175808069	0.175808069	2.975891769	5.694309715	15.01648598	15.01648598	19.71036523	24.68556634	37.16247857	42.7730193	48.08371623	45.02410448	44.9452505	44.9452505	41.04283153	28.28112614	8.794894774	20.73005908
15:07:59.931	0.175908178	0.175908178	2.97685929	5.695862512	15.01958489	15.01958489	19.71436185	24.69052819	37.16988029	42.78136594	48.09283684	45.0326547	44.95377503	44.95377503	41.04997603	28.28557629	8.797088412	20.73328659
15:09:15.406	0.183839109	0.183839109	3.052703931	5.817386277	15.26162873	15.26162873	20.02635295	25.07774288	37.74729678	43.43223263	48.80365233	45.6989619	45.61795877	45.61795877	41.60636396	28.63209899	8.96833964	20.98460009
15:09:16.381	0.18394321	0.18394321	3.053689141	5.818962257	15.26476152	15.26476152	20.03038884	25.08275026	37.75476122	43.44064321	48.81283249	45.70756636	45.62653446	45.62653446	41.61354441	28.63657033	8.970555031	20.9878429
15:09:17.349	0.184046605	0.184046605	3.054667413	5.820527074	15.26787198	15.26787198	20.03439589	25.08772182	37.76217218	43.44899346	48.82194666	45.71610896	45.63504847	45.63504847	41.62067312	28.64100942	8.972754592	20.99106234
15:09:18.325	0.184150896	0.184150896	3.055653902	5.82210497	15.27100827	15.27100827	20.03843618	25.09273457	37.76964449	43.45741274	48.83113606	45.72472203	45.64363269	45.64363269	41.62786053	28.64548504	8.974972398	20.99430827
15:09:19.310	0.184256192	0.184256192	3.056649632	5.823697579	15.27417365	15.27417365	20.04251387	25.0977937	37.77718586	43.46590975	48.84041016	45.73341447	45.65229599	45.65229599	41.63511407	28.65000182	8.977210743	20.99758405
15:09:20.273	0.184359177	0.184359177	3.05762325	5.825254756	15.27726846	15.27726846	20.04650059	25.10273991	37.78455886	43.47421696	48.84947699	45.74191261	45.66076561	45.66076561	41.64220536	28.65441754	8.979399151	21.00078653
15:09:21.260	0.184464772	0.184464772	3.058621273	5.826850899	15.28044055	15.28044055	20.05058681	25.10780953	37.79211574	43.48273128	48.85876973	45.75062246	45.66944621	45.66944621	41.64947321	28.65894317	8.981642181	21.00406875
15:09:22.236	0.184569232	0.184569232	3.059608313	5.82842941	15.28357745	15.28357745	20.05462763	25.11282279	37.79958854	43.49115078	48.86795885	45.75923517	45.67802995	45.67802995	41.65665989	28.66341824	8.983860291	21.00731428
15:09:23.207	0.184673201	0.184673201	3.060590441	5.829999999	15.28669844	15.28669844	20.05864791	25.11781053	37.80702324	43.49952726	48.8771009	45.76780373	45.68656968	45.68656968	41.66380962	28.66787028	8.986067132	21.01054312
15:09:24.188	0.184778281	0.184778281	3.061582814	5.831586906	15.28985171	15.28985171	20.06270971	25.12284972	37.81453457	43.50799	48.88633696	45.77646038	45.69519717	45.69519717	41.67103275	28.672368	8.988296761	21.01380509
15:09:25.158	0.184882226	0.184882226	3.062564203	5.833156183	15.29296979	15.29296979	20.06672612	25.12783258	37.82196185	43.51635796	48.89546946	45.78501993	45.70372786	45.70372786	41.67817476	28.67681517	8.99050148	21.0170304
15:09:26.148	0.184988357	0.184988357	3.063565965	5.83475797	15.29615232	15.29615232	20.07082547	25.13291829	37.82954239	43.5248985	48.90479018	45.79375587	45.71243432	45.71243432	41.68546383	28.6813539	8.992751733	21.02032212
15:09:27.122	0.185092817	0.185092817	3.06455169	5.836334047	15.2992836	15.2992836	20.07485877	25.13792202	37.83700065	43.53330119	48.91396033	45.80235066	45.72100008	45.72100008	41.69263502	28.6858192	8.994965726	21.02356059
15:09:28.091	0.185196781	0.185196781	3.065532478	5.837902164	15.30239891	15.30239891	20.07887144	25.14290011	37.84442065	43.54166068	48.92308322	45.81090112	45.72952163	45.72952163	41.69976912	28.69026138	8.9971684	21.02678229
15:09:29.077	0.185302614	0.185302614	3.066530634	5.839497984	15.30556911	15.30556911	20.08295473	25.14796579	37.85197111	43.55016709	48.9323663	45.8196017	45.73819277	45.73819277	41.70702836	28.69478145	8.999409846	21.03006049
15:09:30.045	0.185406557	0.185406557	3.067510703	5.841064819	15.30868157	15.30868157	20.08696361	25.1529391	37.85938384	43.55851823	48.94147982	45.82814333	45.74670548	45.74670548	41.71415489	28.69921886	9.001610443	21.03327874
15:09:31.029	0.185512261	0.185512261	3.068507117	5.842657721	15.31184566	15.31184566	20.09103892	25.15799478	37.86691929	43.56700754	48.95074399	45.83682612	45.75535885	45.75535885	41.72139908	28.70372951	9.003847508	21.03655011
15:09:32.006	0.185617256	0.185617256	3.069496579	5.844239442	15.31498738	15.31498738	20.09508536	25.16301462	37.87440123	43.57543649	48.95994218	45.84544704	45.76395052	45.76395052	41.72859154	28.70820793	9.006068731	21.0397981
15:09:32.978	0.185721758	0.185721758	3.070481139	5.845813259	15.31811324	15.31811324	20.09911133	25.16800901	37.88184519	43.58382256	48.96909344	45.85402397	45.77249832	45.77249832	41.73574719	28.7126634	9.008278717	21.04302946
15:09:33.963	0.1858277	0.1858277	3.071479	5.847408272	15.32128105	15.32128105	20.10319125	25.1730703	37.88938879	43.5923208	48.97836698	45.86271546	45.78116028	45.78116028	41.74299832	28.71717829	9.010518324	21.04630391
15:09:34.927	0.185931426	0.185931426	3.072455734	5.84896945	15.32438151	15.32438151	20.10718437	25.17802387	37.89677177	43.60063802	48.98744286	45.87122167	45.78963756	45.78963756	41.75009477	28.72159684	9.012710286	21.0495085
15:09:35.914	0.186037672	0.186037672	3.073455923	5.85056805	15.32755613	15.32755613	20.11127295	25.18309582	37.90433112	43.60915383	48.99673533	45.87993083	45.79831708	45.79831708	41.75736043	28.72612073	9.014954648	21.05278949
15:09:36.893	0.1861431	0.1861431	3.074448154	5.852153863	15.33070521	15.33070521	20.11532856	25.18812683	37.9118294	43.61760076	49.0059525	45.8885694	45.80692623	45.80692623	41.7645671	28.73060785	9.017180918	21.05604381
15:09:37.857	0.186246956	0.186246956	3.075425334	5.853715558	15.33380623	15.33380623	20.11932224	25.19308097	37.91921303	43.62591846	49.01502854	45.89707567	45.8154035	45.8154035	41.77166329	28.73502616	9.019373191	21.05924824
15:09:38.833	0.186352148	0.186352148	3.076414821	5.855296855	15.33694603	15.33694603	20.12336579	25.19809694	37.92668876	43.63433982	49.02421755	45.9056878	45.82398624	45.82398624	41.77884769	28.73949936	9.021592844	21.06249248
15:09:39.825	0.186459107	0.186459107	3.077420673	5.856904235	15.34013746	15.34013746	20.12747577	25.20319528	37.93428717	43.6428993	49.03355716	45.91444103	45.83270959	45.83270959	41.78614969	28.74404577	9.023848966	21.06578981
15:09:40.797	0.186563956	0.186563956	3.078406403	5.858479395	15.34326476	15.34326476	20.1315031	25.20819105	37.94173267	43.65128644	49.04270859	45.92301787	45.84125712	45.84125712	41.79330445	28.74850046	9.026059724	21.06902063
15:09:41.767	0.186668632	0.186668632	3.079390262	5.8600515	15.34638585	15.34638585	20.13552237	25.21317679	37.94916313	43.65965655	49.05184133	45.93157716	45.84978714	45.84978714	41.80044446	28.75294594	9.028266056	21.07224478
15:09:42.737	0.186773351	0.186773351	3.080374257	5.861623756	15.34950708	15.34950708	20.13954177	25.21816264	37.95659371	43.66802672	49.060974	45.94013636	45.85831705	45.85831705	41.80758429	28.75739129	9.030472462	21.07546883
15:09:43.728	0.186880382	0.186880382	3.081379718	5.863230243	15.35269611	15.35269611	20.14364842	25.22325668	37.96418546	43.67657835	49.07030453	45.94888097	45.86703171	45.86703171	41.81487869	28.76193283	9.032726765	21.07876266
15:09:44.693	0.186984649	0.186984649	3.082358951	5.864794759	15.35580167	15.35580167	20.14764751	25.22821728	37.97157826	43.6849058	49.07939035	45.9573962	45.87551775	45.87551775	41.82198164	28.76635516	9.034922033	21.08197002
15:09:45.674	0.187090689	0.187090689	3.083354577	5.866385399	15.35895893	15.35895893	20.15171313	25.23326035	37.97909391	43.69337154	49.08862693	45.96605268	45.88414454	45.88414454	41.82920232	28.77085075	9.037153818	21.08523053
15:09:46.655	0.187196774	0.187196774	3.084350359	5.867976221	15.3621164	15.3621164	20.15577895	25.23830363	37.98660981	43.70183748	49.0978636	45.97470923	45.89277137	45.89277137	41.83642294	28.77534628	9.039385718	21.088491
15:09:47.630	0.187302254	0.187302254	3.085340197	5.869557482	15.36525474	15.36525474	20.15982008	25.24331624	37.99407993	43.71025177	49.10704379	45.98331281	45.90134541	45.90134541	41.8435993	28.77981422	9.041604063	21.09173146
15:09:48.600	0.187407237	0.187407237	3.086325112	5.871130812	15.36837718	15.36837718	20.16384068	25.24830336	38.001512	43.71862311	49.116177	45.99187233	45.90987551	45.90987551	41.85073879	28.78425918	9.043811146	21.09495526
15:09:49.586	0.187513997	0.187513997	3.087326441	5.872730296	15.37155137	15.37155137	20.16792785	25.25337301	38.009067	43.72713284	49.12546107	46.0005732	45.91854645	45.91854645	41.85799609	28.78877745	9.046054775	21.09823223
15:09:50.560	0.187619502	0.187619502	3.088315733	5.874310485	15.37468712	15.37468712	20.17196546	25.25838114	38.01653025	43.73553915	49.13463219	46.00916819	45.92711185	45.92711185	41.86516496	28.79324064	9.0482712	21.10146926
15:09:51.530	0.187724618	0.187724618	3.089301124	5.875884377	15.37781022	15.37781022	20.17598673	25.26336896	38.02396317	43.7439112	49.14376581	46.017728	45.93564218	45.93564218	41.8723044	28.79768548	9.050478654	21.10469298
15:09:52.505	0.187830321	0.187830321	3.090291747	5.877466561	15.38094962	15.38094962	20.18002892	25.26838271	38.03143466	43.75232661	49.15294661	46.026332	45.94421652	45.94421652	41.8794806	28.80215317	9.052697599	21.10793328
15:09:53.492	0.18793737	0.18793737	3.091294722	5.879068406	15.38412788	15.38412788	20.18412108	25.27345838	38.03899837	43.76084582	49.16224052	46.03504197	45.95289644	45.95289644	41.88674507	28.80667578	9.054943976	21.11121343
15:09:54.467	0.188043162	0.188043162	3.092285663	5.880650963	15.38726772	15.38726772	20.18816371	25.27847259	38.04647041	43.76926169	49.17142158	46.04364614	45.96147091	45.96147091	41.89392121	28.81114338	9.057163166	21.11445367
15:09:55.442	0.188148999	0.188148999	3.093276765	5.882233712	15.39040778	15.39040778	20.19220657	25.28348704	38.05394275	43.77767781	49.18060279	46.05225042	45.97004548	45.97004548	41.90109735	28.81561093	9.059382484	21.11769389
15:09:56.417	0.188254882	0.188254882	3.094268035	5.883816663	15.39354808	15.39354808	20.19624968	25.28850177	38.06141545	43.78609425	49.18978422	46.06085488	45.97862021	45.97862021	41.90827353	28.82007849	9.061601947	21.12093412
15:09:57.392	0.18836081	0.18836081	3.095259459	5.885399794	15.3966886	15.3966886	20.200293	25.29351671	38.06888839	43.79451089	49.19896575	46.0694594	45.98719497	45.98719497	41.91544966	28.82454598	9.063821523	21.12417431
15:09:58.367	0.188466782	0.188466782	3.096251044	5.886983116	15.39982933	15.39982933	20.20433655	25.2985319	38.07636164	43.80292778	49.20814744	46.07806403	45.99576983	45.99576983	41.92262579	28.82901344	9.066041229	21.12741447
15:09:59.337	0.188572256	0.188572256	3.097237708	5.888558514	15.4029542	15.4029542	20.2083596	25.30352164	38.08379689	43.81130181	49.21728223	46.08662469	46.00430084	46.00430084	41.92976515	28.83345798	9.068249687	21.13063802
15:11:15.392	0.196979784	0.196979784	3.175075658	6.012636519	15.64859886	15.64859886	20.52441743	25.69540685	38.66754792	44.46850438	49.93382483	46.75801796	46.67333126	46.67333126	42.48940878	29.1817443	9.241758125	21.38326713
15:11:16.372	0.197089869	0.197089869	3.176084466	6.014241971	15.65177128	15.65177128	20.52849667	25.7004633	38.67507741	44.47697808	49.94305903	46.7666687	46.6819513	46.6819513	42.49661632	29.18622812	9.243997642	21.38651984
15:11:17.348	0.19719955	0.19719955	3.177089301	6.015841035	15.65493093	15.65493093	20.53255942	25.70549927	38.68257634	44.4854173	49.95225556	46.77528409	46.69053612	46.69053612	42.50379433	29.19069353	9.246228109	21.3897592
15:11:18.326	0.197309499	0.197309499	3.178096338	6.017443535	15.65809722	15.65809722	20.53663064	25.7105457	38.6900908	44.49387392	49.96147091	46.78391708	46.69913848	46.69913848	42.51098692	29.19516797	9.24846323	21.39300513
15:11:19.307	0.197419831	0.197419831	3.179106618	6.019051129	15.66127342	15.66127342	20.54071454	25.71560782	38.69762854	44.50235666	49.97071463	46.7925766	46.70776726	46.70776726	42.51820154	29.19965605	9.250705316	21.39626097
15:11:20.281	0.197529418	0.197529418	3.180109827	6.020647405	15.66442712	15.66442712	20.54476943	25.72063394	38.70511261	44.51077892	49.97989234	46.80117422	46.71633438	46.71633438	42.52536452	29.20411197	9.252931478	21.39949348
15:11:21.261	0.197639727	0.197639727	3.181119367	6.022253688	15.66760043	15.66760043	20.54884948	25.72569121	38.712643	44.51925323	49.98912664	46.80982483	46.72495429	46.72495429	42.53257155	29.20859524	9.255171455	21.40274585
15:11:22.234	0.197749292	0.197749292	3.182121847	6.02384867	15.67075127	15.67075127	20.55290057	25.73071255	38.72011983	44.52766718	49.99829506	46.81841366	46.73351265	46.73351265	42.53972706	29.2130464	9.257395536	21.40597494
15:11:23.208	0.197859012	0.197859012	3.183125494	6.025445443	15.67390549	15.67390549	20.55695595	25.73573917	38.72760445	44.53608983	50.00747284	46.82701123	46.7420797	46.7420797	42.54688976	29.217502	9.259621975	21.40920726
15:11:24.185	0.197969117	0.197969117	3.184132389	6.027047317	15.67706964	15.67706964	20.56102403	25.74078149	38.73511239	44.54453863	50.01667902	46.83563534	46.75067322	46.75067322	42.5540745	29.22197125	9.261855387	21.4124495
15:11:25.162	0.198079265	0.198079265	3.185139431	6.028649357	15.68023398	15.68023398	20.56509227	25.74582398	38.74262051	44.55298756	50.02588522	46.84425944	46.75926672	46.75926672	42.56125915	29.2264404	9.264088892	21.41569167
15:11:26.142	0.198189797	0.198189797	3.186149709	6.030256478	15.68340819	15.68340819	20.56917316	25.7508821	38.75015185	44.56146254	50.03511968	46.85290996	46.76788655	46.76788655	42.56846574	29.23092315	9.266329342	21.41894373
15:11:27.117	0.198299809	0.198299809	3.187154979	6.031855567	15.6865664	15.6865664	20.57323339	25.75591459	38.75764495	44.56989441	50.04430707	46.86151633	46.77646239	46.77646239	42.57563548	29.23538293	9.268558454	21.42217912
15:11:28.089	0.198409527	0.198409527	3.188157308	6.03344991	15.68971508	15.68971508	20.57728131	25.76093179	38.76511523	44.57830051	50.05346627	46.87009626	46.78501189	46.78501189	42.58278311	29.2398289	9.270780814	21.42540452
15:11:29.071	0.198520419	0.198520419	3.189170091	6.035060816	15.69289632	15.69289632	20.58137103	25.76600075	38.77266251	44.58679318	50.06271968	46.87876439	46.79364927	46.79364927	42.59000415	29.24432049	9.27302612	21.42866302
15:11:30.040	0.198629887	0.198629887	3.19016962	6.036650572	15.69603565	15.69603565	20.58540679	25.77100281	38.78011011	44.59517362	50.07185069	46.88731782	46.80217236	46.80217236	42.59712956	29.24875254	9.275241811	21.43187834
15:11:31.022	0.198740869	0.198740869	3.191182711	6.038261833	15.6992173	15.6992173	20.58949689	25.77607217	38.78765786	44.60366666	50.08110428	46.89598602	46.81080983	46.81080983	42.60435051	29.25324396	9.277487333	21.43513676
15:11:31.996	0.198850991	0.198850991	3.192187688	6.039860123	15.70237318	15.70237318	20.59355381	25.78110037	38.79514425	44.61209059	50.09028246	46.90458353	46.81937685	46.81937685	42.61151249	29.25769866	9.279714639	21.43836853
15:11:32.976	0.198961837	0.198961837	3.193199011	6.041468437	15.70554871	15.70554871	20.5976359	25.78615974	38.802677	44.62056659	50.09951726	46.91323405	46.82799669	46.82799669	42.61871856	29.26218073	9.281955775	21.44162018
15:11:33.952	0.199072275	0.199072275	3.194206353	6.043070355	15.70871146	15.70871146	20.60170151	25.79119864	38.8101792	44.62900814	50.10871442	46.92184924	46.83658135	46.83658135	42.62589513	29.2666444	9.284187859	21.44485849
15:11:34.921	0.199181966	0.199181966	3.195206621	6.044660956	15.71185171	15.71185171	20.60573814	25.79620159	38.81762781	44.63738932	50.11784568	46.93040267	46.84510446	46.84510446	42.63302018	29.27107598	9.286404036	21.44807353
15:11:35.900	0.199292834	0.199292834	3.19621736	6.046268141	15.71502456	15.71502456	20.6098166	25.80125635	38.82515348	44.64585713	50.12707122	46.93904436	46.85371552	46.85371552	42.64021868	29.27555318	9.288643182	21.45132169
15:11:36.878	0.199403633	0.199403633	3.197227215	6.047873853	15.71819436	15.71819436	20.61389106	25.80630612	38.83267167	44.65431643	50.13628739	46.94767722	46.86231779	46.86231779	42.64740975	29.28002572	9.290880137	21.45456647
15:11:37.848	0.199513571	0.199513571	3.198228961	6.049466607	15.72133842	15.72133842	20.61793238	25.81131478	38.84012859	44.66270672	50.14542825	46.9562395	46.87084973	46.87084973	42.65454196	29.28446159	9.2930989	21.45778467
15:11:38.838	0.199625821	0.199625821	3.199251512	6.051092371	15.72454749	15.72454749	20.6220572	25.81642688	38.84773946	44.67127015	50.15475763	46.96497831	46.87955758	46.87955758	42.66182113	29.28898881	9.295363507	21.46106915
15:11:39.807	0.199735735	0.199735735	3.200252526	6.052683826	15.7276887	15.7276887	20.62609471	25.82143075	38.85518912	44.67965211	50.1638892	46.97353179	46.88808076	46.88808076	42.66894587	29.29341994	9.297580186	21.46428393
15:11:40.793	0.199847623	0.199847623	3.20127125	6.054303371	15.7308852	15.7308852	20.63020323	25.82652258	38.86276966	44.68818126	50.17318101	46.98223531	46.89675346	46.89675346	42.67619551	29.29792869	9.299835848	21.46755504
15:11:41.762	0.199957627	0.199957627	3.202272564	6.055895171	15.73402679	15.73402679	20.63424111	25.83152683	38.87021976	44.69656356	50.18231273	46.99078883	46.90527669	46.90527669	42.68332014	29.30235964	9.302052731	21.47076972
15:11:42.737	0.200068357	0.200068357	3.203280228	6.057496999	15.73718802	15.73718802	20.63830416	25.83656225	38.8777162	44.70499792	50.19150106	46.99939532	46.91385272	46.91385272	42.69048882	29.30681793	9.304283441	21.47400425
15:11:43.715	0.200179473	0.200179473	3.204291146	6.059103933	15.74035918	15.74035918	20.64237991	25.84161337	38.88523593	44.71345841	50.20071775	47.00802833	46.92245517	46.92245517	42.69767951	29.31128986	9.306521123	21.47724869
15:11:44.696	0.200290974	0.200290974	3.205305308	6.060715957	15.74354024	15.74354024	20.64646831	25.84668013	38.89277889	44.72194496	50.2099627	47.01668777	46.93108396	46.93108396	42.70489215	29.31577539	9.308765753	21.480503
15:11:45.666	0.200401272	0.200401272	3.206308262	6.062310097	15.74668586	15.74668586	20.6505111	25.85169032	38.90023758	44.73033661	50.21910418	47.02525023	46.93961613	46.93961613	42.71202395	29.32021058	9.310985343	21.48372082
15:11:46.653	0.200513547	0.200513547	3.207328941	6.063932344	15.74988679	15.74988679	20.6546249	25.85678849	38.90782718	44.73887547	50.2284059	47.03396274	46.94829781	46.94829781	42.71928065	29.3247234	9.313243927	21.48699496
15:11:47.624	0.200624048	0.200624048	3.208333223	6.065528465	15.75303602	15.75303602	20.6586722	25.8618042	38.91529395	44.74727606	50.23755689	47.04253401	46.95683878	46.95683878	42.72641965	29.32916297	9.315465997	21.49021597
15:11:48.595	0.200734595	0.200734595	3.209337668	6.067124776	15.75618548	15.75618548	20.66271972	25.86682015	38.92276103	44.75567691	50.24670806	47.05110541	46.96537987	46.96537987	42.73355868	29.3336025	9.317688196	21.49343697
15:11:49.569	0.200845527	0.200845527	3.210345354	6.068726172	15.75934483	15.75934483	20.66677988	25.87185174	38.9302513	44.76410379	50.25588747	47.0597032	46.97394727	46.97394727	42.74071963	29.33805561	9.319917336	21.49666784
15:11:50.548	0.200957074	0.200957074	3.211358372	6.070335976	15.76252062	15.76252062	20.6708611	25.87690938	38.9377803	44.77257416	50.26511415	47.06834522	46.98255875	46.98255875	42.74791735	29.34253153	9.322158039	21.49991527
15:11:51.530	0.20106901	0.20106901	3.212374653	6.071950897	15.76570634	15.76570634	20.67495502	25.88198274	38.94533264	44.7810707	50.27436922	47.07701379	46.99119668	46.99119668	42.7551371	29.3470211	9.324405725	21.50317261
15:11:52.498	0.201179395	0.201179395	3.213376593	6.073542962	15.76884684	15.76884684	20.67899076	25.88698395	38.95277751	44.78944626	50.2834924	47.08555877	46.99971148	46.99971148	42.76225386	29.35144657	9.326621463	21.50638347
15:11:53.473	0.201290623	0.201290623	3.214385932	6.075146719	15.77201025	15.77201025	20.68305587	25.89202153	38.96027645	44.79788258	50.29268166	47.09416559	47.00828791	47.00828791	42.76942206	29.35590397	9.328853334	21.5096175
15:11:54.464	0.201403723	0.201403723	3.21541199	6.076776971	15.77522578	15.77522578	20.68718788	25.89714197	38.96789868	44.80645751	50.3020218	47.10291367	47.0170051	47.0170051	42.77670784	29.36043442	9.331121935	21.51290456
15:11:55.433	0.201514358	0.201514358	3.216415429	6.07837122	15.77837014	15.77837014	20.69122838	25.90214898	38.97535199	44.81484233	50.31115474	47.11146764	47.02552889	47.02552889	42.78383189	29.36486426	9.333340297	21.51611862
15:11:56.408	0.201625722	0.201625722	3.217425226	6.079975504	15.78153415	15.78153415	20.69529405	25.90718715	38.98285162	44.82327919	50.32034427	47.12007455	47.03410543	47.03410543	42.79099996	29.36932141	9.335572486	21.51935252
15:11:57.384	0.201737247	0.201737247	3.21843622	6.081581622	15.78470163	15.78470163	20.69936412	25.91223073	38.99035924	44.83172495	50.32954337	47.12869039	47.04269088	47.04269088	42.7981754	29.37378309	9.337807087	21.52258972
15:11:58.372	0.20185019	0.20185019	3.219459801	6.083207668	15.78790825	15.78790825	20.70348442	25.91733652	38.9979594	44.84027474	50.33885568	47.1374122	47.05138194	47.05138194	42.80543903	29.37829955	9.340069273	21.52586668
15:11:59.339	0.201960777	0.201960777	3.220461775	6.084799324	15.79104692	15.79104692	20.70751732	25.92233398	39.00539823	44.84864297	50.34797013	47.14594865	47.05988829	47.05988829	42.81254822	29.38271992	9.342283477	21.52907393
15:12:00.325	0.202073584	0.202073584	3.221483593	6.086422435	15.79424746	15.79424746	20.71162966	25.92742984	39.01298348	44.85717583	50.35726377	47.15465288	47.06856184	47.06856184	42.81979707	29.38722707	9.344541299	21.53234417
15:13:15.838	0.210851201	0.210851201	3.300198757	6.211254017	16.03995232	16.03995232	21.02712128	26.31827172	39.5945618	45.51117613	51.06925624	47.82132095	47.73292808	47.73292808	43.37481747	29.73213765	9.517766427	21.78265068
15:13:16.818	0.210966902	0.210966902	3.301226098	6.212880597	16.04314818	16.04314818	21.03122205	26.32335057	39.60211671	45.51966883	51.078498	47.82997206	47.74155014	47.74155014	43.38201768	29.73660954	9.52001813	21.78589671
15:13:17.790	0.211081706	0.211081706	3.302245211	6.214494084	16.04631817	16.04631817	21.03528954	26.3283882	39.60961022	45.52809244	51.08766447	47.83855264	47.75010192	47.75010192	43.38915914	29.74104486	9.522251572	21.78911623
15:13:18.774	0.211197971	0.211197971	3.303277041	6.216127637	16.04952743	16.04952743	21.03940737	26.33348812	39.61719634	45.53662006	51.09694402	47.84723902	47.75875917	47.75875917	43.3963886	29.74553478	9.524512649	21.79237539
15:13:19.739	0.211312037	0.211312037	3.304289093	6.217729811	16.05267491	16.05267491	21.04344584	26.33848973	39.62463615	45.54498315	51.10604444	47.85575765	47.76724925	47.76724925	43.4034784	29.74993789	9.526730158	21.79557156
15:13:20.725	0.211428629	0.211428629	3.305323303	6.219366996	16.05589102	16.05589102	21.0475723	26.34360029	39.63223796	45.55352826	51.11534281	47.86446153	47.77592398	47.77592398	43.41072232	29.75443665	9.528995985	21.79883717
15:13:21.694	0.211543257	0.211543257	3.306339831	6.220976123	16.05905187	16.05905187	21.05162778	26.3486229	39.63970889	45.56192618	51.12448094	47.87301533	47.78444916	47.78444916	43.41784129	29.75885775	9.531222842	21.80204643
15:13:22.664	0.211658048	0.211658048	3.307357544	6.222587059	16.06221614	16.06221614	21.05568757	26.35365083	39.64718766	45.57033283	51.13362845	47.88157787	47.79298307	47.79298307	43.42496748	29.76328326	9.533452069	21.80525891
15:13:23.657	0.211775607	0.211775607	3.308399538	6.224236363	16.06545561	16.06545561	21.05984379	26.35879814	39.65484395	45.57893894	51.14299291	47.89034342	47.80171934	47.80171934	43.43226257	29.7678136	9.535734247	21.80854751
15:13:24.620	0.211889658	0.211889658	3.309410188	6.225835987	16.06859737	16.06859737	21.06387456	26.36379005	39.66226904	45.5872851	51.1520744	47.89884405	47.81019158	47.81019158	43.43933712	29.77220692	9.537947545	21.81173665
15:13:25.605	0.212006361	0.212006361	3.310444073	6.227472319	16.07181108	16.07181108	21.06799757	26.36889617	39.66986393	45.59582204	51.1613634	47.90753884	47.81885736	47.81885736	43.44657321	29.7767005	9.540211496	21.81499859
15:13:26.572	0.212120976	0.212120976	3.311459204	6.229078903	16.07496621	16.07496621	21.07204537	26.37390912	39.67732017	45.60420306	51.17048263	47.91607467	47.82736472	47.82736472	43.45367696	29.78111182	9.542434151	21.81820084
15:13:27.553	0.212237296	0.212237296	3.312489176	6.230708907	16.0781672	16.0781672	21.07615192	26.37899478	39.68488452	45.61270552	51.1797339	47.92473403	47.83599523	47.83599523	43.46088345	29.78558689	9.54468907	21.82144938
15:13:28.525	0.212352593	0.212352593	3.313509838	6.232324111	16.08133898	16.08133898	21.08022092	26.38403393	39.69237961	45.62113004	51.18890027	47.93331387	47.8445465	47.8445465	43.46802372	29.79002076	9.546923377	21.82466803
15:13:29.504	0.212468766	0.212468766	3.314537989	6.2339511	16.08453376	16.08453376	21.08431936	26.38910949	39.6999288	45.6296153	51.19813263	47.94195541	47.85315929	47.85315929	43.47521528	29.79448642	9.549173849	21.82790977
15:13:30.485	0.212585222	0.212585222	3.31556839	6.23558158	16.08773525	16.08773525	21.08842633	26.39419558	39.70749359	45.63811803	51.20738389	47.95061459	47.86178966	47.86178966	43.48242146	29.7989611	9.55142901	21.83115807
15:13:31.472	0.212702435	0.212702435	3.316605229	6.23722218	16.09095646	16.09095646	21.09255853	26.39931289	39.71510475	45.64667278	51.21669165	47.95932659	47.87047272	47.87047272	43.48967154	29.80346297	9.553698029	21.83442614
15:13:32.445	0.212818031	0.212818031	3.317627502	6.238839666	16.09413214	16.09413214	21.09663225	26.40435775	39.72260809	45.65510627	51.22586738	47.96791495	47.87903255	47.87903255	43.49681868	29.80790086	9.555934941	21.83764777
15:13:33.414	0.212933197	0.212933197	3.318645713	6.240450658	16.09729494	16.09729494	21.10068936	26.40938201	39.73008073	45.66350518	51.23500539	47.97646795	47.88755716	47.88755716	43.50393634	29.81232038	9.558162738	21.84085608
15:13:34.388	0.213049002	0.213049002	3.319669324	6.242070128	16.10047423	16.10047423	21.10476757	26.41443236	39.73759212	45.67194756	51.24419059	47.98506506	47.89612576	47.89612576	43.51109065	29.81676259	9.560402122	21.84408089
15:13:35.367	0.213165447	0.213165447	3.320698327	6.243698061	16.10366999	16.10366999	21.10886683	26.41950875	39.74514217	45.68043332	51.25342289	47.9937062	47.90473825	47.90473825	43.51828154	29.82122746	9.562653069	21.84732215
15:13:36.340	0.213281221	0.213281221	3.321721152	6.245316153	16.10684629	16.10684629	21.11294106	26.42455411	39.75264601	45.68886705	51.2625985	48.00229421	47.91329781	47.91329781	43.52542817	29.82566479	9.564890274	21.85054343
15:13:37.312	0.213396924	0.213396924	3.322743086	6.246932769	16.11001955	16.11001955	21.11701131	26.42959452	39.76014242	45.69729236	51.27176483	48.01087349	47.92184869	47.92184869	43.53256747	29.8300975	9.5671253	21.85376139
15:13:38.297	0.213514217	0.213514217	3.32377881	6.248571133	16.11323535	16.11323535	21.12113606	26.43470238	39.76773909	45.70583028	51.28105358	48.01956728	47.93051372	47.93051372	43.53980202	29.83458929	9.569390256	21.85702224
15:13:39.266	0.213629651	0.213629651	3.324797858	6.250183051	16.1163991	16.1163991	21.12519397	26.43972744	39.77521256	45.71422965	51.2901915	48.02811985	47.93903801	47.93903801	43.54691898	29.83900801	9.571618513	21.86023007
15:13:40.258	0.213747871	0.213747871	3.32584124	6.25183339	16.11963811	16.11963811	21.12934835	26.44487192	39.78286358	45.72282848	51.29954631	48.03687536	47.94776458	47.94776458	43.55420477	29.84353148	9.573899744	21.86351395
15:13:41.228	0.213863514	0.213863514	3.32686161	6.253447267	16.12280542	16.12280542	21.13341067	26.4499024	39.79034497	45.7312366	51.30869355	48.04543653	47.95629748	47.95629748	43.56132878	29.84795445	9.576130435	21.8667249
15:13:42.209	0.213980513	0.213980513	3.327893701	6.255079613	16.12600882	16.12600882	21.13751924	26.45499009	39.79791139	45.7397402	51.31794456	48.05409477	47.96492715	47.96492715	43.56853351	29.85242748	9.578386518	21.86997219
15:13:43.180	0.214096365	0.214096365	3.328915405	6.256695465	16.12917972	16.12917972	21.14158602	26.46002602	39.80540078	45.74815714	51.32710121	48.06266463	47.97346874	47.97346874	43.57566464	29.85685476	9.580619666	21.87318629
15:13:44.152	0.21421238	0.21421238	3.329938301	6.258313136	16.13235404	16.13235404	21.14565714	26.46506727	39.81289803	45.75658284	51.33626728	48.07124326	47.98201908	47.98201908	43.58280301	29.86128647	9.582855193	21.87640362
15:13:45.127	0.214328799	0.214328799	3.330964499	6.259935961	16.13553833	16.13553833	21.14974097	26.47012424	39.82041859	45.76503466	51.34546166	48.07984833	47.99059579	47.99059579	43.58996332	29.86573174	9.585097706	21.8796308
15:13:46.107	0.214445858	0.214445858	3.331996082	6.261567237	16.13873906	16.13873906	21.1538458	26.4752072	39.82797772	45.77352974	51.35470301	48.0884973	47.99921628	47.99921628	43.59716011	29.87019959	9.587351757	21.8828744
15:13:47.082	0.214562367	0.214562367	3.333022557	6.263190367	16.14192366	16.14192366	21.15792988	26.48026442	39.83549853	45.78198168	51.36389733	48.09710219	48.00779285	48.00779285	43.60432016	29.87464458	9.589594417	21.88610142
15:13:48.073	0.214680834	0.214680834	3.334066014	6.264840282	16.14516067	16.14516067	21.16208109	26.48540474	39.84314285	45.79057235	51.37324245	48.10584817	48.01651006	48.01651006	43.61159755	29.87916235	9.591873945	21.88938128
15:13:49.046	0.214797192	0.214797192	3.335090644	6.266460362	16.14833899	16.14833899	21.16615698	26.49045175	39.85064836	45.79900693	51.3824177	48.1144351	48.02506875	48.02506875	43.61874253	29.88359787	9.594112115	21.89260145
15:13:50.025	0.214914315	0.214914315	3.33612175	6.268090613	16.15153713	16.15153713	21.1702582	26.4955301	39.85820041	45.80749373	51.39164964	48.12307503	48.0336803	48.0336803	43.62593157	29.88806067	9.596364198	21.89584143
15:13:50.986	0.215029326	0.215029326	3.337134016	6.269691012	16.15467656	16.15467656	21.17428407	26.50051513	39.8656136	45.81582442	51.40071166	48.13155589	48.0421333	48.0421333	43.63298818	29.89244121	9.59857491	21.89902171
15:13:51.973	0.215147497	0.215147497	3.338173824	6.271334886	16.15790114	16.15790114	21.17841904	26.50563521	39.8732276	45.82438067	51.41001896	48.14026623	48.05081505	48.05081505	43.64023568	29.89694019	9.600845538	21.90228799
15:13:52.939	0.215263196	0.215263196	3.339191635	6.272943919	16.16105722	16.16105722	21.18246612	26.51064644	39.88067964	45.83275485	51.4191281	48.14879107	48.05931192	48.05931192	43.64732877	29.90134326	9.603067904	21.90548465
15:13:53.924	0.215381217	0.215381217	3.340229609	6.27458476	16.16427555	16.16427555	21.18659294	26.51575637	39.88827841	45.84129383	51.42841641	48.15748353	48.06797588	48.06797588	43.65456127	29.90583281	9.605334065	21.90874412
15:13:54.896	0.215497725	0.215497725	3.341254015	6.276204087	16.16745154	16.16745154	21.1906654	26.52079896	39.89577697	45.84972013	51.43758205	48.16606113	48.07652536	48.07652536	43.66169815	29.91026295	9.607570377	21.91196045
15:13:55.875	0.215615116	0.215615116	3.34228594	6.27783523	16.17065056	16.17065056	21.19476732	26.525878	39.90332967	45.85820718	51.44681367	48.17470043	48.08513636	48.08513636	43.66888629	29.91472485	9.60982287	21.91519987
15:13:56.850	0.215732073	0.215732073	3.343313782	6.279459855	16.17383665	16.17383665	21.19885259	26.53093638	39.91085161	45.86665958	51.45600751	48.18330431	48.09371206	48.09371206	43.67604491	29.91916836	9.612066224	21.91842595
15:13:57.826	0.215849195	0.215849195	3.344342817	6.281086297	16.17702616	16.17702616	21.20294217	26.53600008	39.91838138	45.87512071	51.46521074	48.19191692	48.10229648	48.10229648	43.68321074	29.9236163	9.614311952	21.92165524
15:13:58.807	0.215966962	0.215966962	3.345377266	6.282721228	16.18023217	16.18023217	21.20705283	26.54108986	39.92594988	45.88362526	51.4744611	48.20057359	48.11092483	48.11092483	43.69041316	29.92808688	9.616569263	21.924901
15:13:59.782	0.216084053	0.216084053	3.346405515	6.284346295	16.1834187	16.1834187	21.21113844	26.54614858	39.93347213	45.89207777	51.48365476	48.20917713	48.11950024	48.11950024	43.69757132	29.93252994	9.618812818	21.92812679
15:15:15.438	0.225308978	0.225308978	3.426627028	6.410926569	16.43118541	16.43118541	21.52859202	26.93912664	40.51764715	46.54824052	52.1970567	48.87662591	48.7847905	48.7847905	44.25268958	30.27693608	9.793153601	22.17820367
15:15:16.407	0.225428943	0.225428943	3.427660242	6.412554264	16.43436583	16.43436583	21.53266413	26.94416648	40.52513682	46.55664975	52.20619576	48.88517431	48.79331136	48.79331136	44.25979652	30.28134361	9.795390169	22.18140425
15:15:17.392	0.225550938	0.225550938	3.42871068	6.414209028	16.437599	16.437599	21.5368037	26.94928979	40.53275048	46.5651981	52.2154859	48.89386399	48.80197304	48.80197304	44.26702085	30.2858239	9.797663794	22.18465768
15:15:18.371	0.225672236	0.225672236	3.429754861	6.415853867	16.44081263	16.44081263	21.54091819	26.95438202	40.54031789	46.57369445	52.22471944	48.90250067	48.81058188	48.81058188	44.27420103	30.29027677	9.799923648	22.18789119
15:15:19.341	0.225792467	0.225792467	3.430789599	6.417483764	16.44399692	16.44399692	21.54499504	26.95942765	40.54781601	46.5821129	52.23386822	48.91105802	48.81911166	48.81911166	44.2813152	30.29468865	9.802162839	22.19109495
15:15:20.326	0.225914603	0.225914603	3.431840474	6.419139015	16.4472306	16.4472306	21.54913505	26.96455142	40.55543018	46.59066157	52.24315843	48.9197476	48.82777323	48.82777323	44.28853921	30.29916863	9.804436726	22.19434816
15:15:21.295	0.226034801	0.226034801	3.43287443	6.420767551	16.45041194	16.45041194	21.55320799	26.96959215	40.56292091	46.59907154	52.25229781	48.92829607	48.83629414	48.83629414	44.29564583	30.30357576	9.806673779	22.19754847
15:15:22.274	0.226156287	0.226156287	3.433919203	6.422413055	16.45362629	16.45362629	21.5573231	26.97468507	40.57048912	46.60756842	52.26153154	48.93693274	48.84490296	48.84490296	44.3028257	30.30802828	9.808934007	22.20078174
15:15:23.243	0.226276579	0.226276579	3.434953453	6.424041921	16.456808	16.456808	21.56139636	26.97972614	40.57798024	46.61597866	52.27067104	48.94548122	48.85342387	48.85342387	44.30993218	30.31243525	9.811171248	22.20398194
15:15:24.228	0.226398904	0.226398904	3.436004926	6.425697846	16.46004242	16.46004242	21.56553702	26.98485062	40.58559524	46.62452789	52.27996146	48.95417082	48.86208545	48.86208545	44.3171559	30.31691489	9.813445518	22.20723491
15:15:25.197	0.226519289	0.226519289	3.437039467	6.427327039	16.46322448	16.46322448	21.56961058	26.98989202	40.59308675	46.63293838	52.28910104	48.96271928	48.87060634	48.87060634	44.3242622	30.32132168	9.815682941	22.21043497
15:15:26.176	0.226640962	0.226640962	3.438084827	6.428973202	16.46643954	16.46643954	21.57372632	26.9949856	40.60065572	46.64143576	52.29833493	48.9713559	48.8792151	48.8792151	44.33144172	30.32577383	9.817943534	22.21366799
15:15:27.146	0.226761563	0.226761563	3.439120717	6.430604388	16.46962521	16.46962521	21.57780435	27.00003249	40.60815527	46.6498551	52.30748393	48.97991309	48.88774468	48.88774468	44.33855513	30.33018494	9.820183427	22.2168712
15:15:28.131	0.226884076	0.226884076	3.440172781	6.432260975	16.47286034	16.47286034	21.58194564	27.00515763	40.61577104	46.65840482	52.31677452	48.98860265	48.8964062	48.8964062	44.34577849	30.33466421	9.822458065	22.22012391
15:15:29.107	0.227005517	0.227005517	3.441215375	6.433902585	16.47606608	16.47606608	21.58604922	27.01023609	40.62331739	46.66687652	52.32598022	48.99721277	48.90498853	48.90498853	44.35293574	30.33910245	9.824712002	22.22334682
15:15:30.083	0.227127004	0.227127004	3.442258112	6.435544353	16.47927198	16.47927198	21.59015294	27.01531469	40.63086389	46.67534831	52.33518593	49.00582285	48.91357081	48.91357081	44.36009288	30.34354057	9.826966022	22.22656965
15:15:31.058	0.227248413	0.227248413	3.443299925	6.4371846	16.48247477	16.48247477	21.5942526	27.02038825	40.63840285	46.68381152	52.34438223	49.01442408	48.92214427	48.92214427	44.36724259	30.34797405	9.82921782	22.22978911
15:15:32.027	0.227369122	0.227369122	3.444335476	6.438814922	16.48565804	16.48565804	21.5983272	27.02543076	40.64589563	46.69222281	52.35352201	49.02297241	48.93066499	48.93066499	44.37434823	30.35238018	9.831455859	22.2329887
15:15:33.022	0.227493116	0.227493116	3.445398956	6.440489146	16.48892688	16.48892688	21.60251126	27.03060872	40.6535896	46.70085987	52.36290701	49.03175004	48.93941427	48.93941427	44.38164441	30.35690441	9.83375403	22.23627406
15:15:33.994	0.227614291	0.227614291	3.446437997	6.44212483	16.49212033	16.49212033	21.60659875	27.03566713	40.66110589	46.70929737	52.37207509	49.04032474	48.94796126	48.94796126	44.38877182	30.36132395	9.835999161	22.23948341
15:15:34.974	0.227736511	0.227736511	3.447485736	6.44377414	16.49534023	16.49534023	21.61072003	27.04076734	40.66868423	46.71780444	52.38131866	49.04896999	48.95657858	48.95657858	44.39595779	30.36577978	9.83826286	22.2427191
15:15:35.947	0.227857903	0.227857903	3.448526129	6.445411819	16.49853729	16.49853729	21.61481199	27.04583125	40.67620857	46.72625079	52.39049616	49.05755341	48.96513426	48.96513426	44.40309229	30.37020366	9.840510463	22.24593158
15:15:36.915	0.227978717	0.227978717	3.449561321	6.447041248	16.5017181	16.5017181	21.61888308	27.0508693	40.68369445	46.73465388	52.39962656	49.06609274	48.97364597	48.97364597	44.41019006	30.37460472	9.84274661	22.24912751
15:15:37.889	0.228100328	0.228100328	3.450603079	6.448680944	16.50491881	16.50491881	21.62297957	27.05593876	40.69122694	46.7431092	52.40881362	49.07468501	48.98221045	48.98221045	44.41733175	30.37903299	9.844996715	22.25234318
15:15:38.875	0.228223482	0.228223482	3.451657808	6.450340989	16.5081591	16.5081591	21.62712665	27.06107079	40.69885233	46.75166872	52.41811381	49.08338303	48.99088034	48.99088034	44.42456126	30.38351567	9.847274608	22.25559837
15:15:39.845	0.228344686	0.228344686	3.452695572	6.451974268	16.511347	16.511347	21.63120659	27.06611973	40.70635422	46.7600895	52.42726315	49.09193993	48.99940956	48.99940956	44.4316734	30.38792554	9.849515639	22.25880069
15:15:40.829	0.228467685	0.228467685	3.453748453	6.453631272	16.51458106	16.51458106	21.63534554	27.07124166	40.71396451	46.76863188	52.43654452	49.10062026	49.0080618	49.0080618	44.43888805	30.39239894	9.851789088	22.26204914
15:15:41.798	0.228588855	0.228588855	3.454785421	6.455263167	16.51776597	16.51776597	21.63942153	27.07628564	40.72145892	46.77704409	52.44568437	49.1091682	49.01658206	49.01658206	44.44599257	30.39680402	9.854027954	22.26524798
15:15:42.783	0.228712073	0.228712073	3.455839663	6.456922177	16.52100365	16.52100365	21.64356497	27.08141308	40.7290773	46.78559535	52.4549752	49.11785728	49.02524301	49.02524301	44.45321432	30.40128175	9.856303885	22.26849957
15:15:43.752	0.228833335	0.228833335	3.456876918	6.458554391	16.5241889	16.5241889	21.64764124	27.08645737	40.73657206	46.79400778	52.46411509	49.12640517	49.0337632	49.0337632	44.46031864	30.40568664	9.858542924	22.27169827
15:15:44.737	0.228956647	0.228956647	3.457931447	6.460213721	16.52742692	16.52742692	21.65178497	27.09158511	40.74419077	46.80255922	52.47340593	49.13509417	49.04242406	49.04242406	44.46754016	30.41016417	9.860819023	22.27494972
15:15:45.707	0.229078127	0.229078127	3.458970052	6.461847926	16.53061577	16.53061577	21.6558657	27.09663487	40.75169355	46.81098047	52.48255522	49.14365075	49.05095291	49.05095291	44.47465154	30.41457337	9.863060526	22.27815154
15:15:46.685	0.229200654	0.229200654	3.46001736	6.463495761	16.53383107	16.53383107	21.6599802	27.10172641	40.75925836	46.81947123	52.49177994	49.15227783	49.05955202	49.05955202	44.48182143	30.41901881	9.86532059	22.28137969
15:15:47.655	0.229322227	0.229322227	3.461056254	6.465130291	16.53702027	16.53702027	21.66406124	27.10677649	40.76676152	46.82789272	52.50092931	49.16083439	49.06808083	49.06808083	44.48893263	30.42342784	9.867562273	22.28458139
15:15:48.627	0.229444095	0.229444095	3.462097424	6.466768337	16.54021619	16.54021619	21.66815079	27.1118371	40.77428027	46.8363316	52.51009748	49.1694085	49.07662712	49.07662712	44.49605833	30.42784582	9.869808644	22.28778959
15:15:49.619	0.229568518	0.229568518	3.463160163	6.468440247	16.54347803	16.54347803	21.67232463	27.11700199	40.78195389	46.84494421	52.51945429	49.17815898	49.08534921	49.08534921	44.50333053	30.4323546	9.872101321	22.29106372
15:15:50.590	0.229690354	0.229690354	3.464200541	6.470076915	16.54667097	16.54667097	21.67641023	27.12205765	40.78946519	46.85337455	52.528613	49.18672414	49.09388657	49.09388657	44.51044863	30.43676781	9.874345535	22.29426845
15:15:51.570	0.229813365	0.229813365	3.465250704	6.471728908	16.54989366	16.54989366	21.68053383	27.12716032	40.79704626	46.86188311	52.53785658	49.19536863	49.10250299	49.10250299	44.51763257	30.44122181	9.87661063	22.2975028
15:15:52.549	0.229936297	0.229936297	3.466299937	6.473379371	16.55311322	16.55311322	21.68465336	27.13225792	40.80461976	46.87038306	52.54709072	49.20400425	49.11111056	49.11111056	44.52480906	30.44567115	9.878873493	22.30073377
15:15:53.517	0.230057893	0.230057893	3.46733752	6.475011444	16.55629677	16.55629677	21.68872672	27.13729838	40.8121083	46.87878758	52.55622109	49.21254279	49.11962135	49.11962135	44.53190478	30.45007039	9.881111009	22.30392835
15:15:54.493	0.230180541	0.230180541	3.468383816	6.476657156	16.55950678	16.55950678	21.69283388	27.14238062	40.81965887	46.88726162	52.5654269	49.22115182	49.12820239	49.12820239	44.53905901	30.45450587	9.883367092	22.30714925
15:15:55.482	0.23030487	0.23030487	3.469444196	6.478324953	16.56275972	16.56275972	21.69699588	27.14753072	40.8273102	46.89584864	52.57475535	49.2298755	49.1368977	49.1368977	44.54630842	30.45900033	9.885653313	22.31041297
15:15:56.442	0.230425598	0.230425598	3.470473613	6.479943986	16.56591741	16.56591741	21.70103595	27.1525299	40.83473726	46.90418389	52.58381018	49.23834327	49.14533792	49.14533792	44.55334508	30.46336286	9.887872558	22.31358089
15:15:57.425	0.230549264	0.230549264	3.471527835	6.481601964	16.56915092	16.56915092	21.70517294	27.15764899	40.84234242	46.91271891	52.59308195	49.24701385	49.15398029	49.15398029	44.5605502	30.4678298	9.890145053	22.31682463
15:15:58.393	0.23067109	0.23067109	3.472566109	6.483234796	16.57233523	16.57233523	21.70924693	27.16269011	40.84983167	46.92112376	52.60221222	49.25555207	49.16249072	49.16249072	44.56764524	30.47222847	9.892382948	22.32001879
15:15:59.384	0.230795856	0.230795856	3.47362919	6.484906572	16.57559535	16.57559535	21.71341782	27.16785111	40.85749898	46.92972834	52.61155937	49.26429306	49.17120323	49.17120323	44.57490869	30.47673151	9.894674082	22.32328873
15:16:00.355	0.230918151	0.230918151	3.474670957	6.486544765	16.57878984	16.57878984	21.71750468	27.17290809	40.86501171	46.93815935	52.62071787	49.27285759	49.17973986	49.17973986	44.58202543	30.48114357	9.896919059	22.3264926
15:17:15.859	0.240570774	0.240570774	3.556119795	6.614423326	16.82771853	16.82771853	22.03574852	27.56662927	41.44977457	47.59410384	53.33298251	49.93880404	49.84346659	49.84346659	45.13512183	30.8239663	10.0717603	22.57541928
15:17:16.849	0.24069925	0.24069925	3.557193756	6.616106871	16.83099002	16.83099002	22.03992806	27.57179924	41.45745115	47.6027109	53.34232496	49.94753742	49.85217	49.85217	45.14237145	30.82845908	10.07405686	22.57868115
15:17:17.821	0.240825438	0.240825438	3.558248336	6.617759967	16.8342022	16.8342022	22.04403175	27.57687536	41.46498834	47.61116158	53.35149757	49.956112	49.86071512	49.86071512	45.14948915	30.83287009	10.07631175	22.58188364
15:17:18.797	0.240952192	0.240952192	3.5593074	6.619420027	16.83742777	16.83742777	22.04815247	27.58197254	41.47255673	47.61964714	53.36070795	49.96472185	49.86929537	49.86929537	45.15663603	30.83729916	10.07857601	22.58509924
15:17:19.778	0.241079643	0.241079643	3.560372029	6.621088744	16.84067002	16.84067002	22.05229442	27.58709596	41.48016404	47.62817623	53.36996549	49.97337575	49.87791949	49.87791949	45.16381936	30.84175083	10.08085195	22.58833123
15:17:20.751	0.241206103	0.241206103	3.561428129	6.622744029	16.84388603	16.84388603	22.05640277	27.5921778	41.48770956	47.63663595	53.37914765	49.98195915	49.88647332	49.88647332	45.17094407	30.84616615	10.08310943	22.59153681
15:17:21.724	0.241332611	0.241332611	3.562484374	6.624399474	16.8471022	16.8471022	22.06051127	27.59725979	41.49525528	47.64509577	53.38832983	49.99054253	49.89502711	49.89502711	45.17806867	30.85058139	10.08536701	22.59474232
15:17:22.696	0.241459035	0.241459035	3.563539673	6.626053369	16.85031523	16.85031523	22.06461566	27.6023367	41.50279339	47.65354697	53.39750256	49.99911704	49.90357203	49.90357203	45.18518581	30.85499199	10.08762234	22.59794445
15:17:23.676	0.241586548	0.241586548	3.564603804	6.627721043	16.85355487	16.85355487	22.068754	27.60745557	41.51039375	47.66206786	53.40675084	50.00776214	49.91218727	49.91218727	45.19236143	30.85943882	10.08989632	22.60117288
15:17:24.649	0.241713196	0.241713196	3.565660465	6.629376942	16.85677151	16.85677151	22.07286286	27.61253796	41.5179399	47.67052787	53.41593295	50.01634536	49.9207408	49.9207408	45.19948558	30.86385375	10.09215412	22.60437812
15:17:25.629	0.241840803	0.241840803	3.566724881	6.63104493	16.86001147	16.86001147	22.07700145	27.61765711	41.52554059	47.67904892	53.42518122	50.02499038	49.92935591	49.92935591	45.20666093	30.8683004	10.09442828	22.60760638
15:17:26.609	0.241968459	0.241968459	3.567789443	6.63271308	16.86325161	16.86325161	22.08114019	27.62277643	41.53314148	47.68757008	53.43442953	50.03363539	49.93797097	49.93797097	45.21383617	30.87274697	10.09670252	22.61083457
15:17:27.591	0.242096423	0.242096423	3.568856321	6.634384791	16.86649853	16.86649853	22.08528751	27.62790633	41.54075803	47.6961087	53.4436967	50.04229801	49.94660355	49.94660355	45.22102591	30.87720251	10.09898148	22.61406927
15:17:28.553	0.242221826	0.242221826	3.569901598	6.636022591	16.86967944	16.86967944	22.08935045	27.63293185	41.54821955	47.70447342	53.45277503	50.05078407	49.95506016	49.95506016	45.22806902	30.88156718	10.10121408	22.61723797
15:17:29.539	0.242350407	0.242350407	3.570973106	6.637701425	16.8729399	16.8729399	22.09351492	27.63808293	41.55586746	47.71304699	53.46207994	50.05948189	49.96372776	49.96372776	45.23528778	30.88604069	10.10350249	22.62048567
15:17:30.505	0.242476424	0.242476424	3.572023004	6.639346337	16.87613433	16.87613433	22.09759499	27.6431296	41.5633603	47.72144661	53.47119597	50.06800313	49.97221937	49.97221937	45.24235987	30.8904233	10.10574453	22.62366737
15:17:31.486	0.242604446	0.242604446	3.573089354	6.641016957	16.87937855	16.87937855	22.10173857	27.64825481	41.5709697	47.72997679	53.48045362	50.07665671	49.98084282	49.98084282	45.2495417	30.8948739	10.10802148	22.62689841
15:17:32.455	0.24273095	0.24273095	3.574142798	6.642667294	16.88258324	16.88258324	22.10583159	27.65331746	41.57848616	47.7384027	53.48959801	50.08520438	49.9893607	49.9893607	45.25663552	30.89926996	10.11027066	22.63008985
15:17:33.442	0.242859849	0.242859849	3.575215944	6.644348429	16.88584759	16.88584759	22.11000073	27.65847425	41.58614235	47.74698512	53.49891217	50.09391071	49.99803666	49.99803666	45.26386092	30.90374754	10.11256167	22.63334045
15:17:34.407	0.242985922	0.242985922	3.576265308	6.645992244	16.88903933	16.88903933	22.11407707	27.66351623	41.59362804	47.75537632	53.50801871	50.10242294	50.00651917	50.00651917	45.27092513	30.90812523	10.1148017	22.63651852
15:17:35.400	0.2431157	0.2431157	3.577345251	6.647683892	16.89232381	16.89232381	22.11827177	27.66870458	41.60133099	47.76401096	53.51738935	50.111182	50.01524761	50.01524761	45.27819406	30.91262978	10.11710678	22.63978867
15:17:36.378	0.243243567	0.243243567	3.57840903	6.649350155	16.89555885	16.89555885	22.12240325	27.67381474	41.60891781	47.7725153	53.5266185	50.11980876	50.02384419	50.02384419	45.28535311	30.91706622	10.11937713	22.64300936
15:17:37.340	0.243369385	0.243369385	3.579455528	6.650989285	16.89874107	16.89874107	22.12646721	27.67884135	41.61638055	47.78088046	53.53569652	50.12829423	50.03229994	50.03229994	45.2923948	30.92142993	10.12161038	22.64617723
15:17:38.325	0.24349826	0.24349826	3.580527192	6.652667766	16.90199954	16.90199954	22.13062848	27.68398831	41.62402189	47.78944573	53.54499161	50.13698256	50.04095781	50.04095781	45.29960472	30.92589788	10.12389712	22.64942077
15:17:39.304	0.243626396	0.243626396	3.581592456	6.654336157	16.90523828	16.90523828	22.13476448	27.68910398	41.63161676	47.79795878	53.55422995	50.14561781	50.04956275	50.04956275	45.30677049	30.93033847	10.12616998	22.65264443
15:17:40.273	0.243753269	0.243753269	3.582646973	6.655987651	16.90844408	16.90844408	22.13885833	27.69416752	41.63913417	47.80638491	53.56337387	50.15416477	50.05807968	50.05807968	45.31386289	30.93473358	10.12841969	22.65583505
15:17:41.243	0.243880319	0.243880319	3.583702704	6.657640982	16.91165331	16.91165331	22.14295648	27.69923635	41.6466594	47.81481971	53.5725271	50.16272041	50.06660523	50.06660523	45.32096239	30.93913308	10.13067177	22.65902885
15:17:42.227	0.24400925	0.24400925	3.584773815	6.659318332	16.91490901	16.91490901	22.14711391	27.70437849	41.65429341	47.82337632	53.58181244	50.17139949	50.07525376	50.07525376	45.32816421	30.94359599	10.13295644	22.66226866
15:17:43.206	0.244137571	0.244137571	3.585839609	6.66098729	16.91814828	16.91814828	22.15125028	27.70949456	41.66188868	47.8318894	53.59105045	50.1800343	50.08385813	50.08385813	45.33532919	30.94803606	10.13522955	22.66549187
15:17:44.191	0.244266727	0.244266727	3.586912075	6.662666628	16.92140755	16.92140755	22.15541212	27.71464211	41.66953063	47.84045471	53.60034504	50.18872196	50.09251514	50.09251514	45.34253791	30.95250323	10.13751666	22.66873475
15:17:45.161	0.24439396	0.24439396	3.587968329	6.664320517	16.92461729	16.92461729	22.15951063	27.71971132	41.67705623	47.8488895	53.60949791	50.19727713	50.10104009	50.10104009	45.34963659	30.9569022	10.13976898	22.67192809
15:17:46.145	0.244523077	0.244523077	3.589039967	6.665998427	16.9278735	16.9278735	22.16366841	27.72485381	41.68469059	47.85744608	53.61878285	50.2059557	50.10968798	50.10968798	45.35683756	30.96136455	10.14205388	22.67516744
15:17:47.109	0.244649615	0.244649615	3.590089949	6.667642363	16.93106363	16.93106363	22.16774175	27.72989186	41.69216984	47.86582871	53.62787894	50.21445773	50.11815991	50.11815991	45.36389193	30.96573606	10.14429239	22.67834081
15:17:48.088	0.244778169	0.244778169	3.591156404	6.669312026	16.93430356	16.93430356	22.17187859	27.73500841	41.69976559	47.8743418	53.63711652	50.22309197	50.12676356	50.12676356	45.3710559	30.97017547	10.14656581	22.68156347
15:17:49.066	0.244906636	0.244906636	3.592221887	6.670980102	16.93754025	16.93754025	22.17601123	27.74011976	41.70735357	47.88284609	53.64634445	50.23171716	50.13535815	50.13535815	45.37821225	30.97461016	10.14883693	22.68478268
15:17:50.041	0.245034754	0.245034754	3.59328423	6.672643196	16.94076714	16.94076714	22.18013128	27.74521552	41.71491836	47.89132427	53.65554396	50.24031575	50.14392621	50.14392621	45.38534642	30.9790311	10.15110113	22.68799189
15:17:51.011	0.245162262	0.245162262	3.594341259	6.674297906	16.94397762	16.94397762	22.1842303	27.75028525	41.72244446	47.899759	53.66469624	50.24887016	50.15245021	50.15245021	45.39244383	30.98342925	10.15335379	22.69118454
15:17:52.006	0.245293103	0.245293103	3.595425655	6.675995389	16.94727094	16.94727094	22.18843502	27.75548569	41.73016456	47.90841102	53.67408421	50.25764483	50.16119366	50.16119366	45.39972388	30.98794058	10.15566455	22.69445933
15:17:52.971	0.245420044	0.245420044	3.596477484	6.677641828	16.95046509	16.95046509	22.19251304	27.76052942	41.73765197	47.91680217	53.68318902	50.26615482	50.16967332	50.16967332	45.40678422	30.99231575	10.1579057	22.69763527
15:17:53.945	0.245548213	0.245548213	3.59753924	6.679303741	16.95368912	16.95368912	22.19662914	27.76562022	41.74520922	47.92527148	53.69237855	50.27474396	50.17823182	50.17823182	45.41391011	30.99673154	10.16016777	22.70084068
15:17:54.915	0.245675902	0.245675902	3.598596768	6.68095897	16.95690003	16.95690003	22.20072843	27.77069022	41.75273554	47.93370602	53.70153027	50.28329772	50.18675504	50.18675504	45.42100655	31.00112907	10.16242062	22.70403281
15:17:55.899	0.245805479	0.245805479	3.599669677	6.68263821	16.96015738	16.96015738	22.20488692	27.77583342	41.76037048	47.94226219	53.71081387	50.29197471	50.19540101	50.19540101	45.42820511	31.00558989	10.16470602	22.70727087
15:17:56.870	0.245933389	0.245933389	3.600728534	6.684295388	16.9633718	16.9633718	22.20899053	27.78090872	41.76790458	47.95070524	53.71997465	50.30053687	50.20393253	50.20393253	45.43530831	31.0099916	10.16696126	22.710466
15:17:57.861	0.24606398	0.24606398	3.601809326	6.685986831	16.96665253	16.96665253	22.21317872	27.78608862	41.77559391	47.95932213	53.72932396	50.30927522	50.21263957	50.21263957	45.44255755	31.01448381	10.16926301	22.71372681
15:17:58.837	0.24619264	0.24619264	3.602873885	6.687652802	16.96988372	16.96988372	22.21730359	27.79119018	41.78316689	47.96780855	53.73853161	50.31788112	50.2212146	50.2212146	45.44969681	31.01890787	10.17152995	22.71693813
15:17:59.804	0.246320158	0.246320158	3.603928744	6.689303529	16.97308519	16.97308519	22.22139045	27.79624473	41.79067005	47.9762166	53.74765415	50.32640746	50.22971031	50.22971031	45.45676995	31.02329095	10.17377603	22.72011969
15:19:15.567	0.256454078	0.256454078	3.686985513	6.819077259	17.22433685	17.22433685	22.54190241	28.19259763	42.37889655	48.6350523	54.46220817	50.99417162	50.8949552	50.8949552	46.01037465	31.3663547	10.34995777	22.96907715
15:19:16.543	0.256586536	0.256586536	3.688061231	6.82075548	17.22758041	17.22758041	22.54603721	28.19771015	42.38648234	48.6435444	54.471415	51.00277449	50.903524	50.903524	46.01750228	31.37077175	10.35223107	22.97228176
15:19:17.516	0.256718637	0.256718637	3.689133792	6.822428713	17.23081419	17.23081419	22.55015946	28.20280715	42.39404503	48.65201054	54.48059361	51.01135095	50.91206646	50.91206646	46.02460793	31.37517518	10.35449748	22.97547646
15:19:18.498	0.256852008	0.256852008	3.690216421	6.824117588	17.23407805	17.23407805	22.55432	28.20795147	42.40167789	48.66055512	54.48985716	51.02000677	50.92068791	50.92068791	46.03177921	31.37961928	10.35678495	22.97870065
15:19:19.469	0.256983935	0.256983935	3.691287073	6.825787714	17.23730554	17.23730554	22.5584341	28.21303834	42.40922547	48.66900414	54.49901703	51.02856566	50.92921279	50.92921279	46.03887009	31.38401354	10.3590469	22.98188867
15:19:20.459	0.257118494	0.257118494	3.692378832	6.827490702	17.24059639	17.24059639	22.56262889	28.21822496	42.41692102	48.67761868	54.50835625	51.03729212	50.93790454	50.93790454	46.04609967	31.38849377	10.36135322	22.98513905
15:19:21.424	0.257249702	0.257249702	3.693443155	6.829150829	17.24380428	17.24380428	22.56671785	28.22328072	42.42442235	48.68601571	54.51745957	51.04579813	50.94637667	50.94637667	46.05314651	31.39286075	10.36360137	22.98830724
15:19:22.410	0.257383817	0.257383817	3.694530805	6.830847277	17.24708221	17.24708221	22.57089602	28.22844675	42.43208725	48.69459574	54.5267612	51.05448941	50.95503329	50.95503329	46.06034673	31.39732278	10.36589858	22.99154438
15:19:23.382	0.257516076	0.257516076	3.695603155	6.832519796	17.25031375	17.25031375	22.575015	28.23353958	42.4396435	48.70305403	54.53593077	51.06305727	50.96356695	50.96356695	46.06744459	31.40172137	10.36816325	22.99473547
15:19:24.366	0.257650018	0.257650018	3.696688894	6.834213135	17.25358538	17.25358538	22.579185	28.23869546	42.44729326	48.7116169	54.54521361	51.07173094	50.97220596	50.97220596	46.07463	31.40617422	10.37045599	22.99796592
15:19:25.330	0.257781285	0.257781285	3.697752706	6.835872212	17.25679068	17.25679068	22.58327038	28.2437467	42.45478771	48.72000583	54.55430779	51.0802283	50.98066933	50.98066933	46.08166924	31.41053649	10.37270222	23.00113063
15:19:26.315	0.257915461	0.257915461	3.698839839	6.837567595	17.26006598	17.26006598	22.5874449	28.24890814	42.46244563	48.72857761	54.56360012	51.08891078	50.98931703	50.98931703	46.08886173	31.41499372	10.37499746	23.00436422
15:19:27.291	0.25804846	0.25804846	3.69991719	6.839247659	17.26331153	17.26331153	22.59158145	28.25402261	42.4700338	48.73707123	54.57280763	51.09751398	50.99788573	50.99788573	46.09598843	31.41941018	10.37727185	23.00756822
15:19:28.266	0.258181373	0.258181373	3.700993592	6.84092618	17.26655397	17.26655397	22.59571395	28.25913205	42.47761447	48.74555635	54.58200582	51.10610845	51.00644571	51.00644571	46.10310779	31.42382209	10.37954401	23.01076891
15:19:29.235	0.258313515	0.258313515	3.7020635	6.842594512	17.26977658	17.26977658	22.59982112	28.26421014	42.48514859	48.75398925	54.59114733	51.11464993	51.01495287	51.01495287	46.11018315	31.42820673	10.38180226	23.01394979
15:19:30.227	0.258448845	0.258448845	3.703158964	6.844302628	17.2730759	17.2730759	22.60402596	28.26940898	42.49286182	48.76262253	54.60050596	51.12339424	51.02366201	51.02366201	46.11742643	31.43269543	10.38411422	23.01720615
15:19:31.192	0.25858054	0.25858054	3.704224756	6.845964414	17.27628558	17.27628558	22.60811651	28.27446649	42.50036531	48.77102095	54.6096099	51.13190057	51.03213408	51.03213408	46.12447245	31.43706188	10.38636335	23.02037381
15:19:32.159	0.258712555	0.258712555	3.705292894	6.847629795	17.27950208	17.27950208	22.61221566	28.27953461	42.5078845	48.77943684	54.61873271	51.14042449	51.04062364	51.04062364	46.13153295	31.44143731	10.38861722	23.02354797
15:19:33.150	0.258847896	0.258847896	3.706387684	6.849336668	17.28279856	17.28279856	22.61641667	28.28472866	42.51559048	48.78806169	54.62808192	51.14915993	51.04932383	51.04932383	46.13876854	31.44592123	10.39092712	23.02680082
15:19:34.131	0.258981923	0.258981923	3.707471597	6.851026516	17.28606202	17.28606202	22.62057553	28.28987056	42.52321904	48.79659979	54.63733701	51.1578074	51.05793637	51.05793637	46.14593116	31.45035993	10.39321384	23.03002085
15:19:35.095	0.259113674	0.259113674	3.708536856	6.852687221	17.28926906	17.28926906	22.62466242	28.29492345	42.53071551	48.80498995	54.64643165	51.16630492	51.06639953	51.06639953	46.15296947	31.4547216	10.39546101	23.03318499
15:19:36.079	0.259248208	0.259248208	3.709624366	6.854382549	17.29254281	17.29254281	22.62883426	28.30008135	42.53836774	48.81355432	54.65571504	51.17497878	51.07503827	51.07503827	46.16015372	31.4591737	10.39775489	23.03641471
15:19:37.059	0.259382244	0.259382244	3.710707597	6.856071143	17.29580342	17.29580342	22.63298928	28.30521843	42.54598901	48.82208395	54.66496068	51.18361734	51.08364182	51.08364182	46.16730864	31.46360762	10.40003954	23.03963123
15:19:38.025	0.259514413	0.259514413	3.711775491	6.857735766	17.29901761	17.29901761	22.63708506	28.31028226	42.55350157	48.83049181	54.67407423	51.19213246	51.09212239	51.09212239	46.17436121	31.46797811	10.40229162	23.04280173
15:19:39.001	0.259648	0.259648	3.71285459	6.859417792	17.30226525	17.30226525	22.64122341	28.31539869	42.56109213	48.83898686	54.68328221	51.20073578	51.10069077	51.10069077	46.18148672	31.4723938	10.40456713	23.046005
15:19:39.981	0.259782183	0.259782183	3.713938256	6.861106874	17.30552638	17.30552638	22.64537886	28.32053624	42.56871398	48.84751683	54.69252796	51.20937435	51.10929423	51.10929423	46.18864133	31.47682751	10.40685205	23.04922133
15:19:40.962	0.259916552	0.259916552	3.715023175	6.862797844	17.30879101	17.30879101	22.64953871	28.32567921	42.57634381	48.85605563	54.70178317	51.21802174	51.11790643	51.11790643	46.19580313	31.48126568	10.40913939	23.05244089
15:19:41.939	0.260050422	0.260050422	3.716103814	6.86448208	17.31204249	17.31204249	22.65368174	28.33080135	42.58394271	48.86455971	54.71100067	51.22663388	51.12648348	51.12648348	46.20293563	31.48568569	10.4114175	23.05564725
15:19:42.915	0.260184204	0.260184204	3.717183484	6.866164742	17.3152908	17.3152908	22.65782064	28.33591838	42.59153397	48.87305514	54.72020869	51.23523713	51.13505165	51.13505165	46.21006067	31.49010106	10.41369335	23.05885024
15:19:43.885	0.260317211	0.260317211	3.718256658	6.867837218	17.3185193	17.3185193	22.66193424	28.34100409	42.59907874	48.88149844	54.72936013	51.24378748	51.14356711	51.14356711	46.21714179	31.49448922	10.4159553	23.06203348
15:19:44.870	0.260452324	0.260452324	3.719346577	6.869535726	17.32179791	17.32179791	22.66611161	28.34616863	42.60674039	48.89007244	54.73865314	51.25247008	51.15221423	51.15221423	46.22433233	31.49894518	10.41825233	23.06526588
15:19:45.838	0.260585154	0.260585154	3.720417824	6.871205072	17.32502009	17.32502009	22.67021701	28.35124416	42.61426997	48.89849854	54.74778575	51.2610028	51.16071204	51.16071204	46.23139863	31.50332414	10.42050979	23.06844243
15:19:46.823	0.260720366	0.260720366	3.72150803	6.872903899	17.32829902	17.32829902	22.67439466	28.356409	42.62193197	48.90707273	54.75707878	51.26968536	51.16935906	51.16935906	46.23858893	31.50777994	10.42280699	23.0716747
15:19:47.799	0.260854389	0.260854389	3.722588404	6.874587342	17.33154813	17.33154813	22.67853422	28.36152672	42.62952405	48.91556856	54.76628679	51.27828847	51.17792691	51.17792691	46.24571332	31.5121949	10.42508326	23.07487732
15:19:48.770	0.260987776	0.260987776	3.723663398	6.87626234	17.33478079	17.33478079	22.68265277	28.36661844	42.6370775	48.92402108	54.77544776	51.2868476	51.18645093	51.18645093	46.25280119	31.51658721	10.42734799	23.07806351
15:19:49.758	0.261123548	0.261123548	3.724757353	6.877966817	17.3380702	17.3380702	22.68684355	28.37179943	42.64476333	48.93262163	54.78476909	51.29555653	51.19512409	51.19512409	46.260013	31.52105632	10.42965244	23.0813054
15:19:50.730	0.261257169	0.261257169	3.725833734	6.879643849	17.34130651	17.34130651	22.69096659	28.37689666	42.65232487	48.94108299	54.79393947	51.3041244	51.20365674	51.20365674	46.2671079	31.52545298	10.43191966	23.08449472
15:19:51.701	0.2613907	0.2613907	3.726909141	6.881319302	17.34453963	17.34453963	22.69508551	28.38198876	42.65987876	48.9495357	54.80310038	51.31268339	51.21218051	51.21218051	46.27419535	31.52984501	10.43418463	23.08768068
15:19:52.673	0.261524416	0.261524416	3.727985796	6.882996636	17.34777624	17.34777624	22.6992088	28.38708624	42.66744059	48.95799718	54.81227071	51.32125116	51.220713	51.220713	46.28128996	31.53424148	10.436452	23.09086984
15:19:53.655	0.261659557	0.261659557	3.729073668	6.884691382	17.3510463	17.3510463	22.70337464	28.39223631	42.67508036	48.96654579	54.82153538	51.32990704	51.2293332	51.2293332	46.28845744	31.53868309	10.43874279	23.09409174
15:19:54.624	0.261792957	0.261792957	3.730147282	6.886363854	17.35427324	17.35427324	22.70748548	28.39731835	42.68261919	48.97498135	54.83067744	51.33844834	51.23783925	51.23783925	46.29552992	31.54306583	10.44100334	23.09727092
15:19:55.609	0.261928609	0.261928609	3.731238764	6.888064096	17.35755363	17.35755363	22.71166432	28.40248444	42.69028265	48.98355626	54.83997042	51.34713062	51.24648567	51.24648567	46.30271905	31.54752085	10.4433013	23.10050253
15:19:56.582	0.262062656	0.262062656	3.73231708	6.889743767	17.36079418	17.36079418	22.71579236	28.40758769	42.69785285	48.99202672	54.84915012	51.35570704	51.25502663	51.25502663	46.30982041	31.55192147	10.44557133	23.10369466
15:19:57.569	0.262198682	0.262198682	3.733411067	6.891447784	17.36408156	17.36408156	22.71997997	28.41276456	42.70553223	49.00061924	54.858462	51.36440692	51.26369051	51.26369051	46.3170239	31.55638537	10.44787413	23.10693269
15:19:58.535	0.262331861	0.262331861	3.734481902	6.893115677	17.36729911	17.36729911	22.72407856	28.41783136	42.71304827	49.0090289	54.86757563	51.37292156	51.27216987	51.27216987	46.3240739	31.56075415	10.45012799	23.1101017
15:19:59.509	0.262466191	0.262466191	3.735561749	6.894797546	17.37054348	17.37054348	22.72821124	28.42294029	42.72062675	49.01750832	54.87676477	51.38150672	51.28071944	51.28071944	46.3311822	31.56515905	10.4524006	23.11329691
15:21:15.136	0.273042246	0.273042246	3.819815542	7.025834482	17.62288697	17.62288697	23.04943519	28.81995781	43.30941607	49.6760058	55.5900959	52.04787313	51.94423057	51.94423057	46.88262418	31.90684144	10.62907855	23.3611303
15:21:16.112	0.273180612	0.273180612	3.820908027	7.027531186	17.62614886	17.62614886	23.05358476	28.82508523	43.31701836	49.68450459	55.5992987	52.05646903	51.95278857	51.95278857	46.88973403	31.91124616	10.63136129	23.36432517
15:21:17.086	0.273318742	0.273318742	3.821998398	7.029224548	17.62940418	17.62940418	23.05772592	28.83020221	43.32460514	49.69298593	55.60848252	52.06504717	51.96132887	51.96132887	46.89682911	31.9156417	10.63363941	23.36751339
15:21:18.058	0.273456637	0.273456637	3.823086667	7.030914585	17.63265297	17.63265297	23.06185869	28.8353088	43.33217646	49.70144993	55.61764745	52.07360765	51.96985156	51.96985156	46.9039095	31.92002812	10.63591293	23.370695
15:21:19.033	0.273595005	0.273595005	3.824178427	7.032609984	17.63591192	17.63591192	23.06600434	28.84043126	43.33977127	49.70994007	55.62684061	52.08219447	51.97840045	51.97840045	46.91101158	31.92442795	10.63819354	23.37388635
15:21:20.013	0.273734132	0.273734132	3.825275923	7.034314229	17.63918774	17.63918774	23.07017137	28.8455801	43.34740514	49.71847382	55.63608087	52.09082526	51.9869931	51.9869931	46.91814995	31.92885025	10.64048592	23.37709399
15:21:20.990	0.273872882	0.273872882	3.826370193	7.036013404	17.64245368	17.64245368	23.07432576	28.85071328	43.35501576	49.72698147	55.6452928	52.09942955	51.99555934	51.99555934	46.92526632	31.93325889	10.64277136	23.38029173
15:21:21.976	0.274012958	0.274012958	3.82747467	7.03772837	17.64574982	17.64574982	23.0785185	28.85589383	43.36269653	49.73556747	55.65458945	52.10811296	52.00420433	52.00420433	46.93244804	31.937708	10.64507791	23.38351883
15:21:22.933	0.274148962	0.274148962	3.828546801	7.039393049	17.64894917	17.64894917	23.08258807	28.86092213	43.37015156	49.74390103	55.66361268	52.11654095	52.012595	52.012595	46.93941844	31.94202617	10.64731671	23.38665096
15:21:23.920	0.274289278	0.274289278	3.82965267	7.041110055	17.65224895	17.65224895	23.0867853	28.86610816	43.37784037	49.75249583	55.67291867	52.12523304	52.02124858	52.02124858	46.94660716	31.94647957	10.64962576	23.38988118
15:21:24.891	0.274427368	0.274427368	3.830740748	7.042799377	17.65549539	17.65549539	23.09091462	28.87121022	43.38540465	49.76095135	55.68207377	52.13378415	52.02976178	52.02976178	46.95367921	31.95086067	10.65189744	23.39305897
15:21:25.871	0.274566787	0.274566787	3.831839047	7.044504509	17.65877207	17.65877207	23.09508234	28.8763597	43.39303918	49.76948531	55.69131369	52.14241447	52.03835382	52.03835382	46.96081669	31.95528227	10.65419027	23.39626614
15:21:26.861	0.274707678	0.274707678	3.832948697	7.046227202	17.66208235	17.66208235	23.09929273	28.88156185	43.40075177	49.77810643	55.70064788	52.15113282	52.04703348	52.04703348	46.96802688	31.9597489	10.65650658	23.39950598
15:21:27.836	0.274846483	0.274846483	3.834041658	7.047923924	17.66534259	17.66534259	23.1034394	28.88668525	43.40834754	49.78659689	55.70984051	52.15971891	52.05558144	52.05558144	46.97512761	31.96414769	10.65878784	23.40269662
15:21:28.807	0.274984766	0.274984766	3.835130271	7.049613839	17.6685896	17.6685896	23.10756919	28.89178775	43.41591228	49.79505258	55.7189954	52.16826974	52.06409427	52.06409427	46.9821991	31.96852835	10.66105983	23.40587411
15:21:29.778	0.275123098	0.275123098	3.836219018	7.051303902	17.67183676	17.67183676	23.11169909	28.89689036	43.42347713	49.80350832	55.72815025	52.1768205	52.07260702	52.07260702	46.98927044	31.97290889	10.6633319	23.40905152
15:21:30.766	0.275263902	0.275263902	3.837326968	7.053023712	17.67514094	17.67514094	23.11590145	28.90208244	43.43117459	49.81211218	55.73746537	52.18552093	52.08126874	52.08126874	46.99646548	31.97736603	10.66564383	23.4122845
15:21:31.729	0.275401191	0.275401191	3.838407021	7.054700161	17.67836167	17.67836167	23.1199976	28.90714327	43.43867742	49.82049842	55.74654478	52.19400118	52.08971125	52.08971125	47.00347836	31.98171031	10.66789734	23.41543562
15:21:32.710	0.275541094	0.275541094	3.839507385	7.056408077	17.68164271	17.68164271	23.1241704	28.91229876	43.44632052	49.82904137	55.75579376	52.20263978	52.09831138	52.09831138	47.0106221	31.98613563	10.67019304	23.41864554
15:21:33.690	0.275680904	0.275680904	3.840606772	7.058114416	17.68492058	17.68492058	23.12833909	28.91744914	43.45395602	49.83757572	55.76503334	52.21126958	52.10690271	52.10690271	47.01775848	31.99055636	10.67248648	23.42185213
15:21:34.664	0.275819907	0.275819907	3.841699566	7.059810464	17.68817854	17.68817854	23.1324824	28.92256812	43.46154491	49.8460579	55.77421633	52.2198465	52.1154414	52.1154414	47.02485106	31.99494994	10.67476597	23.42503903
15:21:35.648	0.275960387	0.275960387	3.842803718	7.061524079	17.6914701	17.6914701	23.13666838	28.92773978	43.46921184	49.85462722	55.78349358	52.22851143	52.12406767	52.12406767	47.03201632	31.99938851	10.67706894	23.42825858
15:21:36.620	0.276099203	0.276099203	3.843894536	7.063216939	17.69472166	17.69472166	23.14080341	28.93284846	43.47678537	49.86309206	55.79265761	52.23707059	52.13258862	52.13258862	47.03909405	32.00377284	10.6793439	23.43143879
15:21:37.601	0.276239352	0.276239352	3.844995587	7.064925622	17.69800346	17.69800346	23.14497685	28.93800454	43.48442913	49.87163532	55.80190643	52.24570892	52.14118837	52.14118837	47.04623716	32.00819764	10.68163999	23.43464837
15:21:38.559	0.276376264	0.276376264	3.846070966	7.066594407	17.7012085	17.7012085	23.1490526	28.9430399	43.49189386	49.8799784	55.81093845	52.25414474	52.1495865	52.1495865	47.05321273	32.01251864	10.68388235	23.43778265
15:21:39.548	0.276517654	0.276517654	3.847181271	7.06831733	17.70451738	17.70451738	23.15326032	28.94823827	43.49960021	49.88859144	55.82026263	52.26285341	52.15825622	52.15825622	47.06041384	32.01697931	10.68619733	23.44101827
15:21:40.515	0.27665595	0.27665595	3.848267029	7.070002104	17.70775285	17.70775285	23.15737463	28.9533212	43.50713537	49.89701307	55.8293795	52.27136842	52.16673314	52.16673314	47.06745474	32.02134072	10.68846092	23.44418189
15:21:41.505	0.276797584	0.276797584	3.849378741	7.07172709	17.7110654	17.7110654	23.1615869	28.95852511	43.51484982	49.90563499	55.8387131	52.28008584	52.17541154	52.17541154	47.07466292	32.02580573	10.69077842	23.44742066
15:21:42.472	0.276935977	0.276935977	3.850464763	7.073412155	17.71430116	17.71430116	23.16570144	28.96360824	43.52238518	49.91405669	55.84782984	52.28860069	52.18388826	52.18388826	47.08170352	32.03016691	10.69304216	23.45058413
15:21:43.458	0.277077139	0.277077139	3.851572271	7.075130497	17.71760067	17.71760067	23.16989699	28.96879141	43.5300688	49.92264398	55.85712576	52.29728285	52.19253153	52.19253153	47.08888239	32.03461371	10.69535048	23.45380971
15:21:44.432	0.277216632	0.277216632	3.852666431	7.07682807	17.72086016	17.72086016	23.17404158	28.97391159	43.53765899	49.93112679	55.86630847	52.30585926	52.20106948	52.20106948	47.09597374	32.03900626	10.69763078	23.45699595
15:21:45.406	0.277356174	0.277356174	3.853760736	7.078525809	17.72411983	17.72411983	23.17818633	28.97903193	43.54524938	49.93960973	55.87549122	52.31443569	52.20960744	52.20960744	47.10306502	32.04339875	10.69991117	23.46018216
15:21:46.370	0.277494332	0.277494332	3.854843937	7.080206263	17.72734617	17.72734617	23.18228865	28.98409981	43.55276194	49.94800561	55.88457964	52.32292399	52.21805765	52.21805765	47.11008336	32.04774603	10.70216823	23.46333558
15:21:47.363	0.277636696	0.277636696	3.855959862	7.081937424	17.73066973	17.73066973	23.1865145	28.98932025	43.56050063	49.95665412	55.89394143	52.33166758	52.22676198	52.22676198	47.1173127	32.05222398	10.70449326	23.4665838
15:21:48.325	0.277774664	0.277774664	3.857041094	7.083614706	17.7338897	17.7338897	23.19060859	28.99437789	43.56799792	49.96503278	55.90301101	52.34013823	52.23519458	52.23519458	47.12431629	32.05656207	10.70674582	23.46973058
15:21:49.318	0.27791713	0.27791713	3.858157312	7.085346201	17.73721362	17.73721362	23.19483476	28.99959865	43.57573697	49.97368153	55.91237286	52.34888183	52.24389887	52.24389887	47.13154547	32.06103987	10.70907105	23.4729787
15:21:50.278	0.278054909	0.278054909	3.859236565	7.087020299	17.7404272	17.7404272	23.1989206	29.00464601	43.58321893	49.98204289	55.92142353	52.35733477	52.25231381	52.25231381	47.13853427	32.06536874	10.71131907	23.47611881
15:21:51.262	0.278196182	0.278196182	3.860342943	7.08873641	17.7437213	17.7437213	23.20310873	29.00981971	43.59088811	49.9906134	55.93070048	52.36599903	52.26093908	52.26093908	47.1456977	32.06980576	10.7136234	23.47933738
15:21:52.238	0.278336355	0.278336355	3.861440459	7.090438716	17.74698876	17.74698876	23.20726293	29.01495143	43.59849504	49.99911425	55.93990195	52.37459276	52.26949413	52.26949413	47.15280274	32.07420658	10.71590906	23.4825297
15:21:53.223	0.278477873	0.278477873	3.862548248	7.092156898	17.75028655	17.75028655	23.21145562	29.02013067	43.60617234	50.00769367	55.94918835	52.3832658	52.2781281	52.2781281	47.15997327	32.07864793	10.71821591	23.48575143
15:21:54.199	0.278618147	0.278618147	3.863646056	7.093859539	17.75355437	17.75355437	23.21561014	29.02526272	43.61377966	50.01619479	55.95838991	52.39185957	52.28668315	52.28668315	47.16707819	32.08304862	10.72050177	23.48894368
15:21:55.175	0.278758471	0.278758471	3.864744002	7.095562336	17.75682235	17.75682235	23.2197648	29.0303949	43.62138711	50.02469598	55.96759145	52.4004533	52.29523814	52.29523814	47.17418299	32.08744921	10.72278771	23.49213586
15:21:56.146	0.278898125	0.278898125	3.86583646	7.097256563	17.76007374	17.76007374	23.22389831	29.03550091	43.62895572	50.0331537	55.97674584	52.40900296	52.30374923	52.30374923	47.18125129	32.09182716	10.72506203	23.49531163
15:21:57.122	0.279038548	0.279038548	3.86693469	7.098959681	17.76334206	17.76334206	23.22805327	29.04063338	43.63656351	50.0416551	55.98594741	52.41759667	52.31230416	52.31230416	47.18835593	32.09622758	10.72734816	23.49850372
15:21:58.093	0.279178301	0.279178301	3.868027437	7.10065424	17.76659381	17.76659381	23.2321871	29.04573971	43.6441325	50.05011309	55.99510189	52.42614636	52.32081526	52.32081526	47.1954241	32.1006054	10.72962268	23.50167942
15:21:59.078	0.279320119	0.279320119	3.869136074	7.102373379	17.76989259	17.76989259	23.23638066	29.05091977	43.65181073	50.05869305	56.00438829	52.43481925	52.32944898	52.32944898	47.20259404	32.10504622	10.73193006	23.50490083
15:22:00.059	0.279461412	0.279461412	3.870240359	7.10408571	17.77317816	17.77317816	23.24055735	29.05607897	43.65945799	50.06723832	56.01363705	52.44345696	52.33804765	52.33804765	47.20973482	32.10946894	10.73422819	23.50810913
15:23:15.842	0.290525124	0.290525124	3.95594782	7.236808309	18.02741553	18.02741553	23.56355301	29.4549179	44.25049034	50.72744311	56.72788961	53.11044627	53.00197674	53.00197674	47.76091817	32.45074726	10.91197832	23.75572695
15:23:16.828	0.290670979	0.290670979	3.957067863	7.238540484	18.03072807	18.03072807	23.56775891	29.46010949	44.25818169	50.73603176	56.73717737	53.1191185	53.01060872	53.01060872	47.7680821	32.45518144	10.91429328	23.75894505
15:23:17.809	0.290816141	0.290816141	3.958182345	7.240264	18.03402391	18.03402391	23.57194354	29.46527477	44.26583402	50.74457677	56.74641784	53.12774656	53.01919671	53.01919671	47.77520947	32.45959296	10.91659654	23.76214673
15:23:18.784	0.290960467	0.290960467	3.959290156	7.241977145	18.03729978	18.03729978	23.57610275	29.47040863	44.27343974	50.75306967	56.75560184	53.13632187	53.0277322	53.0277322	47.78229322	32.46397742	10.91888583	23.7653288
15:23:19.753	0.291103952	0.291103952	3.960391268	7.243679874	18.04055559	18.04055559	23.58023644	29.47551093	44.28099866	50.76151025	56.76472917	53.14484424	53.03621498	53.03621498	47.78933317	32.46833474	10.92116107	23.76849119
15:23:20.737	0.291249708	0.291249708	3.961509564	7.245409119	18.04386197	18.04386197	23.58443426	29.48069234	44.28867472	50.77008156	56.77399776	53.15349848	53.04482901	53.04482901	47.796482	32.47275941	10.92347162	23.77170249
15:23:21.712	0.291394181	0.291394181	3.962617762	7.247122693	18.04713824	18.04713824	23.5885938	29.48582645	44.29628066	50.7785745	56.78318151	53.16207349	53.05336417	53.05336417	47.80356531	32.47714347	10.92576111	23.77488435
15:23:22.678	0.29153737	0.29153737	3.963715871	7.248820611	18.05038445	18.05038445	23.5927151	29.4909133	44.30381655	50.78698916	56.79228051	53.17056933	53.06182052	53.06182052	47.81058317	32.48148699	10.92802957	23.7780368
15:23:23.666	0.291683869	0.291683869	3.964839119	7.250557345	18.05370472	18.05370472	23.59693037	29.4961161	44.31152414	50.79559548	56.80158665	53.17925856	53.07046936	53.07046936	47.81776073	32.4859293	10.93034976	23.78126099
15:23:24.644	0.291828936	0.291828936	3.965951135	7.252276653	18.05699154	18.05699154	23.60110311	29.50126635	44.31915384	50.80411474	56.81079855	53.18785979	53.07903059	53.07903059	47.82486552	32.49032653	10.93264654	23.78445248
15:23:25.609	0.291972124	0.291972124	3.967048508	7.253973268	18.06023484	18.06023484	23.60522054	29.50634827	44.32668227	50.81252088	56.81988803	53.19634667	53.08747801	53.08747801	47.83187581	32.49466523	10.9349129	23.78760152
15:23:26.594	0.292118331	0.292118331	3.968168763	7.255705203	18.06354552	18.06354552	23.60942345	29.51153564	44.33436687	50.82110131	56.82916587	53.20500941	53.09610045	53.09610045	47.83903131	32.49909375	10.93722631	23.79081578
15:23:27.565	0.292262508	0.292262508	3.96927323	7.257412672	18.06680929	18.06680929	23.61356675	29.51664939	44.34194235	50.82955984	56.83831179	53.21354896	53.10460027	53.10460027	47.84608498	32.50345921	10.93950692	23.79398429
15:23:28.541	0.292407479	0.292407479	3.970383526	7.259129099	18.07009005	18.07009005	23.61773155	29.52178963	44.349557	50.83806205	56.84750484	53.22213248	53.11314386	53.11314386	47.85317493	32.50784707	10.94179937	23.7971691
15:23:29.527	0.292553986	0.292553986	3.971505337	7.260863269	18.07340458	18.07340458	23.62193916	29.52698264	44.3572498	50.84665144	56.85679206	53.23080391	53.12177492	53.12177492	47.86033742	32.51227979	10.94411539	23.80038648
15:23:30.493	0.292697573	0.292697573	3.972604544	7.262562442	18.07665208	18.07665208	23.62606162	29.53207051	44.3647868	50.85506681	56.865891	53.23929952	53.13023099	53.13023099	47.86735464	32.51662255	10.94638456	23.80353861
15:23:31.468	0.292842547	0.292842547	3.973714123	7.264277592	18.07992998	18.07992998	23.63022261	29.53720589	44.3723941	50.86356061	56.87507465	53.2478742	53.13876575	53.13876575	47.87443711	32.52100565	10.94867494	23.80672004
15:23:32.449	0.292988464	0.292988464	3.974830678	7.26600347	18.08322824	18.08322824	23.63440938	29.54237303	44.38004842	50.87210683	56.88431488	53.25650169	53.14735306	53.14735306	47.88156314	32.52541566	10.95097953	23.80992103
15:23:33.433	0.29313488	0.29313488	3.975950792	7.267734793	18.08653677	18.08653677	23.63860912	29.54755612	44.38772631	50.88067932	56.8935834	53.26515556	53.15596663	53.15596663	47.8887109	32.52983907	10.95329126	23.81313178
15:23:34.409	0.293280156	0.293280156	3.977061947	7.269452211	18.08981859	18.08981859	23.64277489	29.55269723	44.39534197	50.88918225	56.90277662	53.2737391	53.16451019	53.16451019	47.89580052	32.53422646	10.95558431	23.8163164
15:23:35.374	0.293423846	0.293423846	3.978160722	7.27115044	18.0930636	18.0930636	23.64689389	29.55778057	44.40287199	50.8975895	56.91186628	53.28222593	53.17295749	53.17295749	47.90281021	32.53856433	10.95785161	23.81946512
15:23:36.360	0.293570713	0.293570713	3.979283549	7.272885787	18.0963794	18.0963794	23.65110267	29.56297466	44.41056602	50.9061798	56.92115374	53.29089743	53.18158858	53.18158858	47.90997236	32.54299651	10.96016835	23.82268232
15:23:37.327	0.293714802	0.293714802	3.980384889	7.274587869	18.0996315	18.0996315	23.65523054	29.56806883	44.418112	50.91460475	56.93026233	53.29940189	53.19005341	53.19005341	47.91699649	32.54734323	10.96244056	23.82583751
15:23:38.312	0.293861625	0.293861625	3.981506884	7.276321817	18.10294435	18.10294435	23.65943546	29.57325804	44.42579869	50.92318672	56.93954059	53.30806474	53.19867588	53.19867588	47.92415139	32.55177083	10.96475519	23.82905144
15:23:39.292	0.294007756	0.294007756	3.982623332	7.278047137	18.10624057	18.10624057	23.6636192	29.57842106	44.43344655	50.93172528	56.94877181	53.31668365	53.20725462	53.20725462	47.93126995	32.55617588	10.96705817	23.83224904
15:23:40.264	0.294152745	0.294152745	3.983730816	7.279758548	18.10951008	18.10951008	23.66776899	29.58354213	44.44103221	50.94019433	56.95792776	53.32523226	53.21576338	53.21576338	47.93833038	32.56054493	10.96934247	23.83542053
15:23:41.240	0.294298382	0.294298382	3.984843007	7.281477179	18.11279324	18.11279324	23.67193604	29.58868444	44.44864929	50.94869839	56.96712148	53.33381612	53.2243072	53.2243072	47.94541987	32.56493191	10.97163629	23.83860506
15:23:42.222	0.294444967	0.294444967	3.985962182	7.283206546	18.11609678	18.11609678	23.67612889	29.59385853	44.45631339	50.95725489	56.97637177	53.34245277	53.23290358	53.23290358	47.95255291	32.56934578	10.97394431	23.84180915
15:23:43.197	0.294590559	0.294590559	3.987073535	7.284923769	18.11937697	18.11937697	23.68029205	29.59899595	44.46392311	50.9657506	56.98555625	53.35102794	53.24143876	53.24143876	47.95963513	32.57372816	10.976236	23.84499041
15:23:44.171	0.294736055	0.294736055	3.988183909	7.286639425	18.12265404	18.12265404	23.68445118	29.60412832	44.47152531	50.97423787	56.99473149	53.35959448	53.24996534	53.24996534	47.96671015	32.57810604	10.97852549	23.84816843
15:23:45.146	0.294881753	0.294881753	3.989295573	7.288357018	18.12593467	18.12593467	23.68861477	29.60926615	44.47913554	50.98273403	57.00391625	53.36816987	53.25850072	53.25850072	47.97379243	32.58248837	10.98081743	23.85134971
15:23:46.117	0.295026904	0.295026904	3.990402825	7.290067741	18.12920204	18.12920204	23.69276147	29.61438308	44.48671477	50.99119551	57.01306341	53.37671014	53.26700114	53.26700114	47.98084565	32.58685266	10.98310009	23.85451793
15:23:47.102	0.295174202	0.295174202	3.991526207	7.291803328	18.13251675	18.13251675	23.69696821	29.61957402	44.49440358	50.99977927	57.02234266	53.38537371	53.27562428	53.27562428	47.98800065	32.59127989	10.9854158	23.85773187
15:23:48.082	0.295320806	0.295320806	3.992644043	7.293530291	18.13581486	18.13581486	23.70115379	29.62473883	44.50205361	51.00831968	57.03157493	53.39399339	53.28420374	53.28420374	47.99511935	32.5956846	10.98771988	23.86092949
15:23:49.050	0.295465667	0.295465667	3.993748346	7.295236291	18.13907279	18.13907279	23.70528834	29.62984059	44.50961022	51.01675573	57.04069429	53.40250764	53.29267825	53.29267825	48.00215093	32.60003536	10.98999588	23.86408798
15:23:50.021	0.295611029	0.295611029	3.994856226	7.296947764	18.14234104	18.14234104	23.70943592	29.63495838	44.51719052	51.02521815	57.04984206	53.41104839	53.30117913	53.30117913	48.00920433	32.60439957	10.99227905	23.86725626
15:23:51.009	0.295758991	0.295758991	3.995983671	7.298689404	18.14566676	18.14566676	23.71365636	29.64016603	44.52490385	51.03382903	57.0591502	53.41973884	53.30982901	53.30982901	48.01638132	32.6088402	10.99460235	23.87048005
15:23:51.986	0.295905359	0.295905359	3.997098725	7.300411846	18.14895568	18.14895568	23.71783004	29.64531592	44.53253159	51.0423443	57.06835488	53.42833267	53.31838272	53.31838272	48.02347846	32.61323138	10.99689992	23.87366798
15:23:52.960	0.29605133	0.29605133	3.998210509	7.302129184	18.15223471	18.15223471	23.72199112	29.6504502	44.54013616	51.05083363	57.07753142	53.43690022	53.32691026	53.32691026	48.03055384	32.61760904	10.99919055	23.87684612
15:23:53.930	0.296196756	0.296196756	3.999317896	7.303839675	18.15550053	18.15550053	23.72613538	29.65556367	44.54770985	51.05928844	57.08667053	53.44543279	53.33540299	53.33540299	48.03760029	32.62196875	11.00147194	23.88001127
15:23:54.917	0.296344784	0.296344784	4.000444849	7.305580331	18.15882381	18.15882381	23.73035248	29.66076696	44.55541653	51.06789163	57.09596995	53.45411501	53.34404465	53.34404465	48.04477026	32.62640484	11.00379343	23.88323189
15:23:55.890	0.296490767	0.296490767	4.001555987	7.307296505	18.1621002	18.1621002	23.73451003	29.66589672	44.56301425	51.07637314	57.10513771	53.46267429	53.35256396	53.35256396	48.05183866	32.63077804	11.00608215	23.88640689
15:23:56.857	0.296635903	0.296635903	4.002660431	7.309002286	18.16535662	18.16535662	23.73864217	29.67099508	44.5705654	51.08480259	57.11424912	53.47118092	53.36103086	53.36103086	48.05886353	32.63512425	11.00835689	23.88956233
15:23:57.847	0.296784545	0.296784545	4.00379131	7.310748838	18.16869073	18.16869073	23.74287283	29.67621493	44.57829645	51.09343282	57.12357743	53.47989005	53.36969929	53.36969929	48.06605557	32.63957384	11.01068588	23.89279286
15:23:58.822	0.296930991	0.296930991	4.004905227	7.312469139	18.17197459	18.17197459	23.74703967	29.68135598	44.58591074	51.10193263	57.13276467	53.48846744	53.37823662	53.37823662	48.07313877	32.64395604	11.01297975	23.89597449
15:23:59.796	0.29707734	0.29707734	4.00601817	7.314187882	18.17525534	18.17525534	23.7512025	29.68649203	44.59351757	51.11042405	57.14194274	53.49703625	53.38676539	53.38676539	48.08021484	32.64833378	11.01527141	23.89915292
15:25:15.307	0.308574744	0.308574744	4.092701559	7.447888077	18.43004334	18.43004334	24.07431054	30.08496393	45.18352694	51.7688625	57.85330868	54.16111013	54.04773193	54.04773193	48.62845671	32.98735814	11.19316991	24.14540023
15:25:16.292	0.308726546	0.308726546	4.093836349	7.449636184	18.4333692	18.4333692	24.07852576	30.09016014	45.19121897	51.77744421	57.86257618	54.16976054	54.05634181	54.05634181	48.63559637	32.99177131	11.19549103	24.14860685
15:25:17.262	0.308876082	0.308876082	4.094953959	7.45135777	18.43664447	18.43664447	24.08267681	30.09527718	45.19879374	51.78589505	57.87170225	54.17827892	54.06482028	54.06482028	48.642627	32.99611706	11.19777682	24.1517645
15:25:18.243	0.309027362	0.309027362	4.096084358	7.453099001	18.43995697	18.43995697	24.08687498	30.10045227	45.2064544	51.79444163	57.88093161	54.18689368	54.07339468	54.07339468	48.64973714	33.0005119	11.20008856	24.15495785
15:25:19.213	0.309176992	0.309176992	4.097202182	7.454820806	18.44323238	18.44323238	24.09102608	30.10556927	45.21402904	51.80289219	57.89005718	54.19541154	54.08187262	54.08187262	48.65676725	33.00485723	11.20237439	24.15811525
15:25:20.189	0.309327595	0.309327595	4.098327035	7.456553382	18.44652815	18.44652815	24.09520292	30.11071794	45.22165051	51.81139493	57.899239	54.20398187	54.0904028	54.0904028	48.66384063	33.00922927	11.20467439	24.16129208
15:25:21.179	0.309480408	0.309480408	4.099468149	7.458310946	18.4498713	18.4498713	24.09943975	30.11594052	45.22938133	51.8200196	57.90855239	54.21267499	54.09905517	54.09905517	48.67101528	33.01366386	11.20700744	24.16451438
15:25:22.143	0.309629254	0.309629254	4.100579395	7.460022452	18.45312672	18.45312672	24.10356532	30.12102589	45.23690901	51.82841758	57.91762089	54.22113949	54.10748001	54.10748001	48.67800122	33.01798176	11.20927923	24.16765192
15:25:23.126	0.309781082	0.309781082	4.101712663	7.46176782	18.4564464	18.4564464	24.10777227	30.12621153	45.24458507	51.83698103	57.92686797	54.22977066	54.11607073	54.11607073	48.68512465	33.02238461	11.21159583	24.17085121
15:25:24.096	0.309930949	0.309930949	4.102831052	7.463490217	18.45972225	18.45972225	24.11192362	30.13132858	45.25215956	51.8454311	57.93599252	54.23828743	54.12454759	54.12454759	48.69215363	33.02672903	11.21388182	24.17400806
15:25:25.075	0.310082257	0.310082257	4.103959953	7.465228747	18.46302865	18.46302865	24.11611361	30.13649321	45.25980443	51.85395963	57.94520169	54.24688316	54.13310303	54.13310303	48.69924771	33.03111366	11.2161891	24.17719415
15:25:26.055	0.310233766	0.310233766	4.10509011	7.466969155	18.46633849	18.46633849	24.1203079	30.14166308	45.26745701	51.86249669	57.95441998	54.25548737	54.14166691	54.14166691	48.70634875	33.03550255	11.21849874	24.18038335
15:25:27.025	0.31038378	0.31038378	4.106208874	7.468691961	18.46961472	18.46961472	24.12445953	30.14678032	45.27503164	51.87094673	57.9635442	54.26400375	54.15014338	54.15014338	48.71337726	33.03984656	11.22078491	24.18353997
15:25:28.013	0.310536627	0.310536627	4.10734852	7.470446867	18.47295185	18.47295185	24.12868827	30.15199255	45.28274684	51.87955352	57.97283759	54.272678	54.15877697	54.15877697	48.72053601	33.04427103	11.22311353	24.18675507
15:25:28.979	0.310686119	0.310686119	4.108462907	7.472162823	18.47621477	18.47621477	24.13282292	30.15708876	45.29029026	51.88796861	57.98192388	54.28115892	54.16721814	54.16721814	48.72753515	33.04859681	11.22539036	24.18989849
15:25:29.952	0.310836744	0.310836744	4.1095855	7.473891359	18.47950148	18.47950148	24.13698765	30.16222199	45.29788843	51.89644471	57.99107596	54.28970123	54.1757204	54.1757204	48.73458491	33.05295384	11.22768374	24.19306463
15:25:30.942	0.310990051	0.310990051	4.110727837	7.475650238	18.48284575	18.48284575	24.14122524	30.16744498	45.30561942	51.90506892	58.00038784	54.29839266	54.18437109	54.18437109	48.74175769	33.05738686	11.23001726	24.19628601
15:25:31.912	0.311140312	0.311140312	4.111847233	7.477373737	18.48612262	18.48612262	24.14537736	30.17256256	45.31319434	51.91351897	58.00951159	54.30690847	54.19284697	54.19284697	48.74878548	33.06173023	11.23230372	24.19944227
15:25:32.882	0.311290623	0.311290623	4.112966764	7.47909739	18.48939963	18.48939963	24.14952961	30.17768026	45.3207694	51.9219691	58.01863533	54.31542423	54.20132281	54.20132281	48.75581319	33.06607351	11.23459025	24.20259848
15:25:33.872	0.311444083	0.311444083	4.114109502	7.480856716	18.49274434	18.49274434	24.15376756	30.18290353	45.32850067	51.93059342	58.02794705	54.32411543	54.20997326	54.20997326	48.76298562	33.07050619	11.23692398	24.20581968
15:25:34.846	0.311595114	0.311595114	4.115233905	7.482587757	18.49603513	18.49603513	24.15793714	30.18804248	45.33610709	51.9390784	58.03710822	54.33266608	54.21848382	54.21848382	48.77004202	33.07486713	11.23922006	24.20898876
15:25:35.825	0.311746972	0.311746972	4.116364227	7.484327854	18.499343	18.499343	24.16212829	30.19320796	45.34375275	51.94760709	58.04631649	54.34126066	54.2270381	54.2270381	48.77713462	33.0792504	11.24152803	24.21217409
15:25:36.790	0.311896709	0.311896709	4.117478522	7.486043221	18.50260372	18.50260372	24.16625964	30.1982997	45.3512892	51.95601391	58.05539307	54.34973231	54.23547002	54.23547002	48.78412573	33.0835709	11.24380307	24.21531383
15:25:37.764	0.312047894	0.312047894	4.118603354	7.487774754	18.50589504	18.50589504	24.17042969	30.20343908	45.35889614	51.96449927	58.06455437	54.35828299	54.24398061	54.24398061	48.79118201	33.08793164	11.24609943	24.21848283
15:25:38.756	0.312201926	0.312201926	4.119749112	7.489538442	18.50924734	18.50924734	24.17467694	30.20867355	45.36664377	51.97314152	58.07388495	54.36699165	54.25264842	54.25264842	48.7983686	33.09237288	11.2484383	24.22171034
15:25:39.728	0.312352904	0.312352904	4.120871919	7.491266744	18.51253224	18.51253224	24.17883873	30.21380266	45.37423541	51.98160969	58.08302749	54.37552477	54.26114153	54.26114153	48.80541029	33.09672453	11.25073012	24.22487277
15:25:40.693	0.312502845	0.312502845	4.121986771	7.492982748	18.51579363	18.51579363	24.18297068	30.21889493	45.38177249	51.99001693	58.09210415	54.38399637	54.2695734	54.2695734	48.81240117	33.10104474	11.25300551	24.22801238
15:25:41.672	0.312655015	0.312655015	4.12311796	7.494723839	18.51910257	18.51910257	24.1871628	30.2240613	45.3894192	51.99854642	58.10131269	54.39259104	54.27812776	54.27812776	48.81949354	33.10542764	11.25531403	24.23119755
15:25:42.658	0.312808326	0.312808326	4.124257379	7.496477541	18.52243534	18.52243534	24.19138504	30.22926475	45.39712075	52.00713698	58.11058708	54.40124713	54.28674325	54.28674325	48.82663657	33.1098418	11.25763915	24.23440546
15:25:43.634	0.312960135	0.312960135	4.125385398	7.498213641	18.52573452	18.52573452	24.19556465	30.23441562	45.40474443	52.01564064	58.11976754	54.40981554	54.29527146	54.29527146	48.83370717	33.11421117	11.2599408	24.23758084
15:25:44.609	0.313111842	0.313111842	4.126512413	7.499948138	18.52903051	18.52903051	24.19974018	30.23956139	45.41236053	52.02413577	58.1289387	54.41837523	54.30379101	54.30379101	48.84077055	33.11857603	11.2622402	24.24075297
15:25:45.590	0.313264537	0.313264537	4.127646522	7.501693496	18.53234701	18.53234701	24.20394161	30.24473904	45.42002377	52.03268341	58.13816646	54.42698772	54.31236309	54.31236309	48.84787743	33.12296775	11.26455388	24.24394462
15:25:46.568	0.313416818	0.313416818	4.128777315	7.503433693	18.53565356	18.53565356	24.20813038	30.24990103	45.42766379	52.0412051	58.14736609	54.43557393	54.32090902	54.32090902	48.85496259	33.127346	11.26686058	24.24712651
15:25:47.542	0.31356853	0.31356853	4.129903646	7.505166969	18.53894682	18.53894682	24.21230225	30.25504216	45.43527288	52.04969221	58.15652831	54.44412519	54.32942017	54.32942017	48.86201885	33.13170636	11.26915798	24.25029541
15:25:48.512	0.313719672	0.313719672	4.131025501	7.506893299	18.54222675	18.54222675	24.21645717	30.26016234	45.44285094	52.05814464	58.16565299	54.45264139	54.33789641	54.33789641	48.86904614	33.13604877	11.27144605	24.25345129
15:25:49.486	0.313871492	0.313871492	4.132152152	7.508626954	18.54552047	18.54552047	24.22062948	30.2653039	45.4504606	52.06663226	58.17481557	54.46119293	54.34640783	54.34640783	48.87610253	33.14040914	11.2737437	24.25662023
15:25:50.472	0.314025237	0.314025237	4.133292841	7.510382151	18.54885497	18.54885497	24.22485339	30.27050901	45.45816426	52.07522466	58.18409115	54.46984991	54.35502419	54.35502419	48.88324589	33.14482321	11.27606977	24.25982822
15:25:51.448	0.314177479	0.314177479	4.13442213	7.512119751	18.5521559	18.5521559	24.22903471	30.27566158	45.46579014	52.08373023	58.19327291	54.47841929	54.36355336	54.36355336	48.89031691	33.14919254	11.27837239	24.26300371
15:25:52.424	0.314329775	0.314329775	4.135551583	7.513857547	18.55545707	18.55545707	24.23321627	30.28081439	45.47341633	52.09223609	58.20245488	54.48698884	54.3720827	54.3720827	48.89738802	33.15356189	11.28067515	24.26617923
15:25:53.399	0.31448197	0.31448197	4.136680047	7.515593763	18.5587551	18.5587551	24.23739379	30.28596218	45.48103503	52.10073353	58.21162768	54.4955498	54.38060348	54.38060348	48.904452	33.1579268	11.28297568	24.26935154
15:25:54.368	0.314633284	0.314633284	4.137801737	7.517319502	18.5620331	18.5620331	24.24154587	30.29107856	45.48860723	52.10917903	58.22074431	54.50405831	54.38907206	54.38907206	48.91147264	33.1622649	11.28526221	24.27250437
15:25:55.347	0.314786215	0.314786215	4.13893517	7.51906325	18.56534517	18.56534517	24.24574103	30.296248	45.49625789	52.11771198	58.22995524	54.5126548	54.39762821	54.39762821	48.91856584	33.16664779	11.28757246	24.27568978
15:25:56.333	0.314940297	0.314940297	4.140076894	7.520819695	18.56868121	18.56868121	24.2499665	30.30145472	45.5039637	52.12630637	58.2392324	54.52131308	54.40624585	54.40624585	48.92570996	33.17106211	11.28989941	24.27889805
15:25:57.308	0.315092715	0.315092715	4.141206043	7.522556739	18.57198027	18.57198027	24.25414506	30.30660359	45.51158385	52.13480516	58.24840626	54.52987491	54.41476749	54.41476749	48.93277446	33.1754272	11.29220053	24.28207055
15:25:58.286	0.315245659	0.315245659	4.142338846	7.524299345	18.57528975	18.57528975	24.25833675	30.3117686	45.51922785	52.14333047	58.25760867	54.53846336	54.42331563	54.42331563	48.93986086	33.17980579	11.29450889	24.28525288
15:25:59.257	0.315397566	0.315397566	4.143463728	7.52602971	18.57857585	18.57857585	24.26249877	30.31689699	45.52681761	52.15179523	58.26674561	54.54699069	54.43180292	54.43180292	48.94689679	33.18415316	11.29680091	24.28841253
15:26:00.232	0.315550154	0.315550154	4.144593409	7.527767402	18.58187573	18.58187573	24.26667817	30.32204676	45.53443896	52.16029516	58.27592042	54.55555332	54.44032536	54.44032536	48.9539618	33.18851846	11.2991025	24.29158523
15:27:16.004	0.32756544	0.32756544	4.23280741	7.663282575	18.83880259	18.83880259	24.59187847	30.72261138	46.1271384	52.8211084	58.9889198	55.22088229	55.10252391	55.10252391	49.50276965	33.52752463	11.47819545	24.53800196
15:27:16.991	0.327723808	0.327723808	4.233960554	7.665051722	18.84215135	18.84215135	24.59611437	30.72782723	46.13485475	52.82970868	58.99819571	55.22953669	55.11113748	55.11113748	49.50990635	33.53193211	11.48052824	24.5412058
15:27:17.956	0.327878692	0.327878692	4.235088095	7.66678153	18.84542553	18.84542553	24.60025585	30.73292677	46.14239899	52.83811707	59.00726457	55.23799788	55.11955876	55.11955876	49.51688367	33.53624114	11.48280903	24.54433807
15:27:18.934	0.328035711	0.328035711	4.236230942	7.668534759	18.8487439	18.8487439	24.60445316	30.73809503	46.15004485	52.84663865	59.01645542	55.24657285	55.12809327	55.12809327	49.52395478	33.54060807	11.48512056	24.54751243
15:27:19.909	0.328192293	0.328192293	4.237370367	7.670282682	18.85205209	18.85205209	24.60863753	30.7432473	46.15766704	52.85513377	59.02561765	55.25512108	55.13660118	55.13660118	49.53100377	33.54496132	11.48742497	24.55067684
15:27:20.885	0.328349087	0.328349087	4.238511092	7.672032539	18.85536381	18.85536381	24.61282629	30.74840494	46.16529713	52.86363763	59.03478922	55.26367799	55.14511771	55.14511771	49.53805987	33.54931895	11.48973179	24.55384443
15:27:21.855	0.328504961	0.328504961	4.239644895	7.673771719	18.85865519	18.85865519	24.61698925	30.75353077	46.17288015	52.87208895	59.04390403	55.27218191	55.1535815	55.1535815	49.54507223	33.55364954	11.4920244	24.55699237
15:27:22.848	0.328664582	0.328664582	4.240805709	7.675552273	18.86202473	18.86202473	24.621251	30.7587782	46.18064302	52.88074063	59.05323486	55.28088733	55.16224584	55.16224584	49.55225069	33.5580827	11.49437141	24.56021486
15:27:23.815	0.328820071	0.328820071	4.241936234	7.677286307	18.86530609	18.86530609	24.62540116	30.7638882	46.18820254	52.88916562	59.0623211	55.28936453	55.17068303	55.17068303	49.55924091	33.56239958	11.49665697	24.56335282
15:27:24.796	0.32897786	0.32897786	4.243083245	7.679045569	18.86863507	18.86863507	24.62961146	30.7690722	46.19587152	52.89771252	59.07153875	55.29796428	55.17924219	55.17924219	49.56633213	33.56677882	11.49897565	24.56653611
15:27:25.762	0.329133284	0.329133284	4.244212825	7.680778038	18.87191321	18.87191321	24.6337574	30.77417692	46.20342318	52.90612859	59.08061521	55.30643228	55.18767022	55.18767022	49.57331467	33.57109092	11.50125888	24.56967059
15:27:26.757	0.329293424	0.329293424	4.24537644	7.682562645	18.87528987	18.87528987	24.63802786	30.77943492	46.21120156	52.91479727	59.08996401	55.31515433	55.1963511	55.1963511	49.58050663	33.57553234	11.50361069	24.57289907
15:27:27.728	0.329449752	0.329449752	4.246512117	7.684304346	18.87858521	18.87858521	24.64219541	30.78456617	46.2187924	52.92325687	59.09908724	55.32366589	55.20482248	55.20482248	49.58752497	33.57986653	11.50590582	24.57604959
15:27:28.695	0.329605483	0.329605483	4.247643224	7.68603898	18.88186704	18.88186704	24.64634581	30.78967627	46.22635193	52.93168149	59.10817267	55.33214215	55.21325871	55.21325871	49.59451416	33.58418269	11.50819151	24.57918701
15:27:29.685	0.329764968	0.329764968	4.248801356	7.687814998	18.88522704	18.88522704	24.65059498	30.79490794	46.23409127	52.94030643	59.11747404	55.34081983	55.22189543	55.22189543	49.60166938	33.58860137	11.51053158	24.58239895
15:27:30.656	0.329921443	0.329921443	4.249937389	7.689557069	18.88852267	18.88852267	24.65476269	30.80003927	46.24168215	52.94876584	59.12659683	55.34933087	55.23036627	55.23036627	49.60868714	33.59293514	11.5128268	24.58554916
15:27:31.625	0.330077645	0.330077645	4.251071206	7.691295683	18.89181164	18.89181164	24.6589219	30.80516009	46.24925745	52.95720782	59.13570072	55.35782424	55.23881954	55.23881954	49.61569029	33.59725987	11.51511732	24.58869279
15:27:32.603	0.330235349	0.330235349	4.252215691	7.693050594	18.89513129	18.89513129	24.66311985	30.81032857	46.25690323	52.96572827	59.14488915	55.36639645	55.24735127	55.24735127	49.62275838	33.6016247	11.51742919	24.59186556
15:27:33.580	0.33039294	0.33039294	4.253359116	7.694803822	18.89844763	18.89844763	24.66731353	30.81549176	46.26454116	52.97423989	59.15406797	55.37495966	55.25587403	55.25587403	49.629819	33.60598489	11.5197387	24.59503496
15:27:34.551	0.330549616	0.330549616	4.254495669	7.696546453	18.9017438	18.9017438	24.67148162	30.82062341	46.27213239	52.98269941	59.16319052	55.38347033	55.2643445	55.2643445	49.63683626	33.61031828	11.52203411	24.59818488
15:27:35.538	0.330708924	0.330708924	4.255651071	7.698317926	18.90509437	18.90509437	24.67571845	30.82583965	46.27984873	52.99129826	59.17246325	55.39212107	55.27295438	55.27295438	49.64396894	33.61472295	11.52436738	24.60138659
15:27:36.505	0.330865054	0.330865054	4.256783191	7.700053642	18.90837719	18.90837719	24.67986953	30.83095027	46.2874088	52.99972289	59.18154801	55.40059642	55.28138969	55.28138969	49.65095697	33.61903826	11.52665342	24.60452335
15:27:37.494	0.33102479	0.33102479	4.257941211	7.701829008	18.91173485	18.91173485	24.68411518	30.83617729	46.29514103	53.0083393	59.1908395	55.40926459	55.2900169	55.2900169	49.65810392	33.62345171	11.52899154	24.60773143
15:27:38.456	0.331180215	0.331180215	4.259067746	7.703556045	18.91500098	18.91500098	24.68824502	30.84126169	46.30266225	53.01672051	59.19987727	55.41769602	55.2984085	55.2984085	49.66505563	33.62774457	11.53126588	24.61085186
15:27:39.444	0.331339893	0.331339893	4.260224874	7.705329922	18.91835556	18.91835556	24.69248662	30.84648365	46.31038694	53.02532836	59.20915935	55.42635534	55.3070269	55.3070269	49.67219519	33.63215341	11.53360177	24.61405658
15:27:40.411	0.331496229	0.331496229	4.26135754	7.707066239	18.92163898	18.92163898	24.69663817	30.85159471	46.31794754	53.03375329	59.2182441	55.43483053	55.31546204	55.31546204	49.67918288	33.63646846	11.53588806	24.61719312
15:27:41.401	0.331656338	0.331656338	4.262517303	7.708844036	18.9250007	18.9250007	24.70088865	30.85682752	46.32568822	53.04237882	59.22754508	55.4435074	55.3240979	55.3240979	49.68633679	33.64088614	11.53822883	24.62040425
15:27:42.372	0.331813425	0.331813425	4.263654938	7.710587851	18.92829802	18.92829802	24.70505765	30.86195998	46.33328043	53.05083881	59.23666747	55.45201764	55.33256792	55.33256792	49.69335327	33.64521893	11.54052473	24.62355368
15:27:43.346	0.331971049	0.331971049	4.264796232	7.712337217	18.93160571	18.93160571	24.70923968	30.86710844	46.34089627	53.05932508	59.24581812	55.46055419	55.34106412	55.34106412	49.70039139	33.64956508	11.54282779	24.6267128
15:27:44.321	0.332128891	0.332128891	4.265938859	7.714088567	18.93491701	18.93491701	24.7134262	30.8722624	46.34852024	53.06782032	59.25497834	55.46909964	55.34956918	55.34956918	49.7074368	33.65391572	11.54513334	24.62987518
15:27:45.309	0.33228889	0.33228889	4.267096862	7.715863423	18.93827262	18.93827262	24.71766867	30.8774852	46.35624599	53.0764289	59.26426071	55.477759	55.35818759	55.35818759	49.71457606	33.65832429	11.54746969	24.63307966
15:27:46.274	0.332445216	0.332445216	4.268228049	7.71759712	18.94155028	18.94155028	24.72181252	30.88258654	46.36379207	53.0848372	59.27332703	55.48621677	55.36660538	55.36660538	49.72154908	33.6626302	11.54975172	24.63620951
15:27:47.250	0.332603378	0.332603378	4.269372284	7.719350754	18.9448655	18.9448655	24.72600378	30.88774623	46.3714244	53.09334154	59.28249682	55.49477104	55.3751192	55.3751192	49.7286016	33.66698518	11.55205986	24.63937502
15:27:48.234	0.332762892	0.332762892	4.270526061	7.721118952	18.94820811	18.94820811	24.7302296	30.89294842	46.37911959	53.10191583	59.29174196	55.50339555	55.38370294	55.38370294	49.73571198	33.67137589	11.55438703	24.64256649
15:27:49.203	0.332920028	0.332920028	4.271662402	7.72286037	18.95149997	18.95149997	24.73439118	30.89807148	46.38669772	53.11035961	59.30084629	55.51188868	55.39215589	55.39215589	49.74271399	33.67569965	11.55667882	24.64570929
15:27:50.189	0.333079974	0.333079974	4.272818827	7.724632506	18.95484975	18.95484975	24.73862593	30.90328458	46.39440899	53.11895167	59.31011041	55.52053083	55.40075717	55.40075717	49.7498388	33.68009924	11.5590109	24.6489072
15:27:51.158	0.333237219	0.333237219	4.27395548	7.726374282	18.95814202	18.95814202	24.74278788	30.90840804	46.40198763	53.12739588	59.31921504	55.52902415	55.40921032	55.40921032	49.75684087	33.68442301	11.56130289	24.65204999
15:27:52.146	0.333397602	0.333397602	4.275114582	7.728150399	18.96149906	18.96149906	24.74703165	30.91363217	46.40971516	53.13600591	59.32849837	55.53768414	55.41782935	55.41782935	49.76398028	33.68883159	11.56363993	24.65525441
15:27:53.119	0.333555606	0.333555606	4.27625625	7.72989974	18.96480535	18.96480535	24.75121119	30.9187772	46.41732568	53.14448548	59.33764095	55.54621279	55.42631766	55.42631766	49.77101137	33.69317327	11.56594161	24.65841019
15:27:54.089	0.333713176	0.333713176	4.277394548	7.73164386	18.96810164	18.96810164	24.75537802	30.92390655	46.42491295	53.15293908	59.34675546	55.55471522	55.43477987	55.43477987	49.77802079	33.69750155	11.56823627	24.66155623
15:27:55.059	0.333870803	0.333870803	4.278533022	7.733388188	18.9713982	18.9713982	24.75954511	30.92903618	46.43250062	53.16139305	59.35587028	55.5632179	55.44324231	55.44324231	49.78503036	33.70182991	11.57053108	24.66470231
15:27:56.049	0.334031735	0.334031735	4.279695131	7.735168669	18.97476294	18.97476294	24.76379832	30.93427179	46.44024503	53.17002156	59.3651732	55.57189602	55.45187937	55.45187937	49.7921845	33.70624753	11.57287331	24.66791327
15:27:57.018	0.33418931	0.33418931	4.280832757	7.73691158	18.97805654	18.97805654	24.76796154	30.93939658	46.44782549	53.17846734	59.37427903	55.58039024	55.46033339	55.46033339	49.79918699	33.7105715	11.57516597	24.67105614
15:27:57.990	0.334347428	0.334347428	4.281974072	7.738660083	18.98136058	18.98136058	24.77213787	30.94453749	46.45542976	53.18693958	59.3834133	55.58891094	55.46881377	55.46881377	49.80621127	33.71490891	11.57746586	24.67420877
15:27:58.968	0.334506579	0.334506579	4.283122601	7.740419577	18.98468526	18.98468526	24.77634022	30.94971037	46.46308131	53.19546441	59.39260419	55.59748443	55.47734669	55.47734669	49.813279	33.71927314	11.57978007	24.67738089
15:27:59.944	0.334665461	0.334665461	4.284268959	7.742175686	18.9880034	18.9880034	24.78053424	30.95487297	46.47071762	53.20397218	59.4017766	55.60604065	55.4858624	55.4858624	49.82033244	33.72362854	11.58208969	24.68054657
15:29:15.444	0.34711722	0.34711722	4.373388124	7.878512691	19.24520206	19.24520206	25.10539871	31.35466205	47.0619999	53.86249279	60.11150063	56.26796352	56.14464104	56.14464104	50.36583628	34.06045118	11.76097521	24.92531194
15:29:16.412	0.347278797	0.347278797	4.374535376	7.880265399	19.24850332	19.24850332	25.10956554	31.3597887	47.06958137	53.87093325	60.12059438	56.27644315	56.15308023	56.15308023	50.37282241	34.06476475	11.76326941	24.92844569
15:29:17.387	0.347441591	0.347441591	4.375691037	7.882030891	19.25182852	19.25182852	25.11376252	31.36495242	47.07721764	53.87943462	60.1297537	56.28498388	56.16158023	56.16158023	50.37985882	34.06910936	11.7655802	24.93160197
15:29:18.357	0.347603599	0.347603599	4.376840888	7.883787446	19.25513676	19.25513676	25.11793801	31.37008967	47.08481475	53.88789233	60.13886589	56.29348062	56.17003644	56.17003644	50.38685894	34.07343157	11.76787915	24.93474194
15:29:19.349	0.347769331	0.347769331	4.378016929	7.885583947	19.2585201	19.2585201	25.12220819	31.37534341	47.09258411	53.89654171	60.14818451	56.3021698	56.17868418	56.17868418	50.39401754	34.07785165	11.77023023	24.93795298
15:29:20.319	0.347931434	0.347931434	4.379166989	7.887340696	19.26182843	19.26182843	25.12638365	31.38048057	47.10018105	53.90499906	60.15729618	56.31066595	56.18713981	56.18713981	50.40101707	34.08217351	11.77252915	24.94109264
15:29:21.294	0.348094424	0.348094424	4.380323104	7.889106633	19.26515394	19.26515394	25.1305807	31.38564426	47.10781722	53.9135	60.16645472	56.31920578	56.19563889	56.19563889	50.40805252	34.08651755	11.77483995	24.94424839
15:29:22.280	0.3482593	0.3482593	4.381492362	7.890892583	19.268517	19.268517	25.13482507	31.39086615	47.11553942	53.92209662	60.17571629	56.32784162	56.20423353	56.20423353	50.41516701	34.0909104	11.77717679	24.94743957
15:29:23.251	0.348421718	0.348421718	4.382643949	7.892651479	19.27182898	19.27182898	25.13900489	31.39600859	47.12314414	53.93056238	60.18483678	56.33634589	56.21269721	56.21269721	50.42217305	34.0952363	11.77947809	24.95058207
15:29:24.222	0.348584183	0.348584183	4.383795642	7.894410477	19.27514102	19.27514102	25.14318471	31.40115101	47.1307488	53.93902799	60.19395705	56.34484989	56.22116062	56.22116062	50.42917882	34.09956203	11.78177938	24.95372443
15:29:25.207	0.348749041	0.348749041	4.384964066	7.896194964	19.27850092	19.27850092	25.14742486	31.40636762	47.13846315	53.94761562	60.2032087	56.35347635	56.22974591	56.22974591	50.43628543	34.10395003	11.78411387	24.95691199
15:29:26.177	0.348911438	0.348911438	4.386114808	7.897952384	19.28180973	19.28180973	25.15160044	31.41150477	47.14605999	53.95607235	60.21231926	56.36197121	56.23820022	56.23820022	50.44328355	34.10827105	11.7864128	24.96005087
15:29:27.158	0.349075724	0.349075724	4.387278704	7.899729831	19.2851561	19.2851561	25.15582336	31.41670013	47.15374288	53.9646248	60.22153286	56.37056211	56.24675011	56.24675011	50.45036075	34.1126409	11.78873779	24.96322519
15:29:28.123	0.34923738	0.34923738	4.388423741	7.901478415	19.28844801	19.28844801	25.15997746	31.4218108	47.16130053	53.97303774	60.23059609	56.37901275	56.2551604	56.2551604	50.45732234	34.11693939	11.79102489	24.96634764
15:29:29.113	0.349403274	0.349403274	4.389598548	7.903272398	19.29182525	19.29182525	25.16423917	31.42705383	47.16905389	53.98166845	60.23989386	56.38768203	56.26378829	56.26378829	50.464464	34.12134905	11.79337122	24.96955081
15:29:30.080	0.349565364	0.349565364	4.390746191	7.905024839	19.29512415	19.29512415	25.16840194	31.43217512	47.1766272	53.99009867	60.24897557	56.39614981	56.27221563	56.27221563	50.4714396	34.12565619	11.79566307	24.97267949
15:29:31.055	0.349728842	0.349728842	4.391903432	7.906791873	19.29845039	19.29845039	25.17259914	31.43733873	47.18426309	53.99859845	60.25813214	56.40468735	56.28071239	56.28071239	50.47847261	34.12999879	11.79797386	24.97583389
15:29:32.032	0.349892704	0.349892704	4.393063154	7.908562634	19.30178351	19.30178351	25.17680494	31.44251289	47.19191457	54.00711551	60.26730725	56.41324213	56.28922631	56.28922631	50.48551978	34.13435013	11.80028939	24.97899461
15:29:33.018	0.350058128	0.350058128	4.394233696	7.910349851	19.30514747	19.30514747	25.18104958	31.44773481	47.19963665	54.01571107	60.27656685	56.42187565	56.29781859	56.29781859	50.49263174	34.13874149	11.80262628	24.98218436
15:29:33.983	0.350220078	0.350220078	4.395379418	7.912099111	19.30843986	19.30843986	25.18520382	31.4528455	47.20719424	54.02412344	60.28562904	56.43032505	56.30622762	56.30622762	50.49959199	34.14303918	11.8049134	24.98530605
15:29:34.970	0.350385769	0.350385769	4.396551376	7.913888364	19.31180738	19.31180738	25.1894528	31.45807271	47.2149241	54.03272749	60.29489765	56.43896687	56.31482815	56.31482815	50.50671068	34.14743471	11.80725267	24.98849877
15:29:35.944	0.350549327	0.350549327	4.397708011	7.91565416	19.31513062	19.31513062	25.19364582	31.46323105	47.22255212	54.0412181	60.30404397	56.44749463	56.32331515	56.32331515	50.51373537	34.1517722	11.80956112	24.9916493
15:29:36.919	0.350713104	0.350713104	4.398865966	7.91742191	19.31845741	19.31845741	25.19784323	31.46839477	47.23018809	54.04971746	60.31319965	56.45603107	56.3318108	56.3318108	50.52076714	34.15611408	11.81187198	24.99480298
15:29:37.896	0.350877265	0.350877265	4.400026396	7.919193375	19.32179105	19.32179105	25.20204923	31.47356902	47.2378396	54.05823404	60.32237382	56.46458469	56.34032354	56.34032354	50.52781302	34.16046468	11.81418755	24.99796297
15:29:38.881	0.351042822	0.351042822	4.40119646	7.920979483	19.32515212	19.32515212	25.20628973	31.4787857	47.24555385	54.06682037	60.33162303	56.47320824	56.34890587	56.34890587	50.53491645	34.16485081	11.81652212	25.00114873
15:29:39.852	0.351206075	0.351206075	4.40235001	7.92274032	19.3284655	19.3284655	25.21047	31.48392825	47.25315845	54.07528457	60.34074063	56.48170904	56.35736602	56.35736602	50.5419187	34.16917448	11.81882351	25.0042891
15:29:40.827	0.35137005	0.35137005	4.403508426	7.924508524	19.3317926	19.3317926	25.2146675	31.48909198	47.26079437	54.08378355	60.34989561	56.49024463	56.36586081	56.36586081	50.54894956	34.17351583	11.82113439	25.00744227
15:29:41.798	0.351533404	0.351533404	4.404662223	7.926269613	19.33510619	19.33510619	25.21884788	31.49423461	47.26839907	54.09224769	60.35901299	56.49874514	56.37432067	56.37432067	50.55595146	34.17783931	11.82343582	25.01058242
15:29:42.783	0.351699161	0.351699161	4.40583276	7.928056191	19.33846761	19.33846761	25.2230885	31.49945133	47.27611333	54.10083368	60.36826157	56.50736791	56.3829022	56.3829022	50.56305402	34.18222494	11.82577042	25.01376769
15:29:43.752	0.351862277	0.351862277	4.406984416	7.929813888	19.34177455	19.34177455	25.22726033	31.50458341	47.28370239	54.10928025	60.37735987	56.51585054	56.39134425	56.39134425	50.57004108	34.18653927	11.82806713	25.01690114
15:29:44.731	0.352027126	0.352027126	4.40814807	7.931589834	19.34511569	19.34511569	25.23147523	31.50976843	47.29136974	54.11781386	60.38655188	56.52442048	56.3998732	56.3998732	50.57710001	34.19089799	11.83038754	25.02006678
15:29:45.707	0.35219152	0.35219152	4.409308282	7.933360464	19.3484467	19.3484467	25.23567726	31.5149376	47.29901364	54.12632129	60.39571561	56.532964	56.40837585	56.40837585	50.58413712	34.19524324	11.83270086	25.02322262
15:29:46.686	0.352356471	0.352356471	4.410472186	7.935136666	19.35178805	19.35178805	25.23989227	31.52012271	47.30668109	54.13485484	60.40490741	56.54153365	56.4169045	56.4169045	50.5911957	34.19960176	11.83502131	25.02638806
15:29:47.662	0.352520966	0.352520966	4.411632642	7.936907543	19.35511926	19.35511926	25.24409439	31.52529195	47.31432506	54.14336217	60.41407089	56.55007686	56.42540683	56.42540683	50.59823244	34.2039468	11.83733466	25.02954368
15:29:48.637	0.352685344	0.352685344	4.412792044	7.938676749	19.35844719	19.35844719	25.24829231	31.53045598	47.32196131	54.15186084	60.42322496	56.55861124	56.43390037	56.43390037	50.60526187	34.20828734	11.83964569	25.03269598
15:29:49.609	0.352849265	0.352849265	4.413947989	7.940440617	19.36176494	19.36176494	25.2524773	31.53560411	47.32957402	54.16033322	60.43235066	56.56711913	56.44236754	56.44236754	50.6122694	34.21261437	11.84194959	25.03583845
15:29:50.596	0.353015768	0.353015768	4.4151219	7.942231836	19.36513401	19.36513401	25.25672695	31.54083173	47.33730429	54.16893633	60.44161709	56.57575818	56.45096523	56.45096523	50.61938492	34.21700809	11.84428907	25.03902931
15:29:51.577	0.353181308	0.353181308	4.416288791	7.94401228	19.36848268	19.36848268	25.26095078	31.54602757	47.34498753	54.17748704	60.45082701	56.58434449	56.45951044	56.45951044	50.62645694	34.22137496	11.84661433	25.04220063
15:29:52.545	0.353344706	0.353344706	4.417440351	7.945769268	19.37178709	19.37178709	25.26511872	31.55115463	47.35256907	54.18592446	60.45991484	56.59281693	56.46794232	56.46794232	50.63343512	34.22568389	11.84890882	25.04532985
15:29:53.518	0.353508999	0.353508999	4.418597986	7.947535465	19.3751087	19.3751087	25.26930826	31.55630824	47.36018985	54.19440548	60.46904955	56.60133304	56.47641765	56.47641765	50.6404492	34.23001501	11.85121518	25.04847515
15:29:54.493	0.353673679	0.353673679	4.419758121	7.949305411	19.37843722	19.37843722	25.27350644	31.56147246	47.36782631	54.20290386	60.4782029	56.60986647	56.48491021	56.48491021	50.6474775	34.23435492	11.85352629	25.05162678
15:29:55.467	0.353838243	0.353838243	4.4209172	7.951073683	19.38176247	19.38176247	25.27770041	31.56663148	47.37545506	54.21139356	60.48734683	56.61839107	56.49339399	56.49339399	50.65449848	34.23869032	11.85583508	25.05477511
15:29:56.453	0.354004884	0.354004884	4.422090674	7.952863854	19.38512875	19.38512875	25.28194607	31.57185405	47.38317777	54.21998775	60.49660323	56.62702048	56.50198207	56.50198207	50.66160572	34.24307899	11.8581723	25.05796209
15:29:57.421	0.354168534	0.354168534	4.423242857	7.954621481	19.38843371	19.38843371	25.2861143	31.57698135	47.3907596	54.22842508	60.50569061	56.63549227	56.51041327	56.51041327	50.66858308	34.24738748	11.8604669	25.06109081
15:29:58.409	0.354335617	0.354335617	4.424418975	7.956415557	19.39180708	19.39180708	25.29036872	31.58221465	47.39849816	54.23703672	60.51496566	56.64413898	56.51901855	56.51901855	50.67570445	34.2517849	11.86280893	25.06428407
15:29:59.380	0.354499876	0.354499876	4.425574978	7.958178886	19.39512249	19.39512249	25.29454997	31.58735793	47.40610359	54.24550014	60.524081	56.65263674	56.52747559	56.52747559	50.6827031	34.25610656	11.86511067	25.06742227
15:30:00.358	0.35466537	0.35466537	4.426739443	7.95995506	19.39846193	19.39846193	25.29876145	31.59253835	47.41376392	54.25402457	60.53326198	56.66119565	56.53599349	56.53599349	50.68975205	34.26045929	11.86742904	25.070583
15:31:16.012	0.367624162	0.367624162	4.517208565	8.097759795	19.65715354	19.65715354	25.62476313	31.99347273	48.00657166	54.91344673	61.24325811	57.32295213	57.19455686	57.19455686	51.2345887	34.59692065	12.04686894	25.31480922
15:31:16.998	0.367795106	0.367795106	4.518392742	8.099561139	19.66052996	19.66052996	25.62901491	31.99870086	48.01430082	54.92204118	61.25250889	57.33157277	57.20313553	57.20313553	51.24168394	34.60130248	12.04920909	25.31798878
15:31:17.970	0.367963676	0.367963676	4.519560233	8.101337043	19.66385857	19.66385857	25.6332064	32.00385484	48.02192031	54.93051362	61.26162828	57.34007091	57.21159229	57.21159229	51.24867831	34.60562201	12.05151605	25.32112312
15:31:18.940	0.368131951	0.368131951	4.520725455	8.103109434	19.66718047	19.66718047	25.63738937	32.00899831	48.02952425	54.93896867	61.27072888	57.34855151	57.22003159	57.22003159	51.25565818	34.60993259	12.05381832	25.32425094
15:31:19.922	0.368302358	0.368302358	4.521905211	8.104903872	19.67054356	19.67054356	25.64162412	32.01420544	48.03722226	54.94752826	61.27994191	57.35713686	57.2285751	57.2285751	51.26272419	34.61429638	12.05614909	25.32741735
15:31:20.907	0.36847334	0.36847334	4.523088704	8.106703934	19.67391706	19.67391706	25.64587191	32.01942857	48.04494388	54.95611402	61.28918306	57.36574835	57.23714463	57.23714463	51.26981167	34.61867342	12.05848703	25.33059335
15:31:21.879	0.368642116	0.368642116	4.524256701	8.108480366	19.67724615	19.67724615	25.65006369	32.02458281	48.05256365	54.96458644	61.29830213	57.37424606	57.24560091	57.24560091	51.27680545	34.62299259	12.06079415	25.33372734
15:31:22.849	0.368810594	0.368810594	4.525422409	8.110253259	19.68056848	19.68056848	25.65424689	32.02972647	48.06016774	54.97304135	61.3074023	57.38272611	57.25403961	57.25403961	51.28378463	34.62730276	12.06309654	25.33685477
15:31:23.829	0.368980863	0.368980863	4.526600274	8.112044581	19.68392522	19.68392522	25.65847333	32.03492328	48.06785036	54.98158351	61.31659629	57.39129355	57.26256527	57.26256527	51.29083568	34.6316573	12.06542273	25.34001439
15:31:24.815	0.369152227	0.369152227	4.527785479	8.113847003	19.68730263	19.68730263	25.66272571	32.04015197	48.07558009	54.99017795	61.32584649	57.39991333	57.271143	57.271143	51.29792974	34.63603842	12.06776321	25.34319326
15:31:25.785	0.36932086	0.36932086	4.528951566	8.115620294	19.69062533	19.69062533	25.66690913	32.04529583	48.08318438	54.99863286	61.33494643	57.40839306	57.27958134	57.27958134	51.30490848	34.64034831	12.07006572	25.34632043
15:31:26.756	0.369489719	0.369489719	4.530118982	8.117395545	19.69395158	19.69395158	25.67109694	32.05044507	48.09079658	55.00709648	61.34405569	57.41688143	57.28802827	57.28802827	51.31189428	34.64466256	12.07237066	25.34945075
15:31:27.736	0.369660194	0.369660194	4.531297347	8.119187386	19.69730878	19.69730878	25.67532364	32.05564211	48.09847942	55.01563856	61.3532493	57.42544838	57.29655338	57.29655338	51.31894468	34.64901671	12.07469699	25.35260999
15:31:28.707	0.369829157	0.369829157	4.532465023	8.120962916	19.7006353	19.7006353	25.67951163	32.06079152	48.10609182	55.02410224	61.36235848	57.4339366	57.30500014	57.30500014	51.32593024	34.65333082	12.07700203	25.35574016
15:31:29.693	0.37000078	0.37000078	4.533650848	8.12276598	19.70401327	19.70401327	25.68376432	32.06602047	48.11382176	55.03269653	61.37160815	57.44255571	57.31357713	57.31357713	51.33302344	34.6577114	12.07934267	25.35891854
15:31:30.664	0.370169844	0.370169844	4.534818762	8.124541752	19.70733999	19.70733999	25.6879524	32.07116995	48.1214342	55.0411601	61.38071706	57.45104361	57.32202355	57.32202355	51.34000862	34.66202527	12.08164776	25.3620485
15:31:31.643	0.370340352	0.370340352	4.535996421	8.12633228	19.71069423	19.71069423	25.69217505	32.07636191	48.12910939	55.04969336	61.38990091	57.4596013	57.3305394	57.3305394	51.34705117	34.66637458	12.08397186	25.36520415
15:31:32.613	0.370509346	0.370509346	4.537163387	8.128106492	19.71401777	19.71401777	25.69635898	32.08150624	48.13671414	55.05814823	61.39900031	57.46808027	57.33897691	57.33897691	51.35402888	34.67068383	12.08627466	25.36833072
15:31:33.598	0.370681004	0.370681004	4.53834852	8.129908265	19.71739282	19.71739282	25.70060766	32.08673016	48.14443651	55.06673379	61.40824031	57.47669021	57.34754472	57.34754472	51.3611143	34.67505961	12.08861311	25.37150553
15:31:34.568	0.370850098	0.370850098	4.539515718	8.131682711	19.72071655	19.72071655	25.70479167	32.09187454	48.15204127	55.07518851	61.41733941	57.48516883	57.35598185	57.35598185	51.3680916	34.67936862	12.09091595	25.37463188
15:31:35.549	0.371021162	0.371021162	4.54069629	8.133477429	19.72407813	19.72407813	25.70902323	32.09707737	48.1597324	55.08373918	61.4265417	57.49374356	57.36451461	57.36451461	51.37514794	34.68372643	12.09324498	25.37779363
15:31:36.519	0.371190359	0.371190359	4.541863736	8.135252135	19.7274021	19.7274021	25.71320738	32.10222188	48.16733727	55.09219387	61.43564063	57.50222195	57.37295148	57.37295148	51.38212493	34.68803525	12.0955479	25.3809198
15:31:37.505	0.3713624	0.3713624	4.543050576	8.137056263	19.73078105	19.73078105	25.71746065	32.10745135	48.17506771	55.10078808	61.44488964	57.51084014	57.38152746	57.38152746	51.38921691	34.69241507	12.09788887	25.38409748
15:31:38.475	0.371531698	0.371531698	4.544218267	8.138831222	19.73410524	19.73410524	25.72164492	32.11259595	48.18267267	55.10924272	61.45398837	57.51931826	57.38996405	57.38996405	51.39619356	34.69672368	12.10019187	25.38722346
15:31:39.457	0.371703145	0.371703145	4.545400539	8.140628287	19.73747071	19.73747071	25.72588106	32.11780431	48.19037183	55.117802	61.46319964	57.52790122	57.39850494	57.39850494	51.40325643	34.70108553	12.10252341	25.39038805
15:31:40.427	0.371872545	0.371872545	4.546568474	8.1424035	19.74079513	19.74079513	25.73006546	32.12294903	48.19797687	55.12625658	61.47229816	57.53637908	57.40694124	57.40694124	51.41023275	34.70539392	12.10482648	25.39351385
15:31:41.413	0.372044792	0.372044792	4.547755799	8.144208124	19.7441745	19.7441745	25.73431893	32.12817866	48.20570741	55.13485058	61.48154666	57.54499665	57.41551654	57.41551654	51.41732398	34.70977328	12.10716758	25.39669111
15:31:42.383	0.372214297	0.372214297	4.54892399	8.145983609	19.74749917	19.74749917	25.7385035	32.13332354	48.21331261	55.14330519	61.49064507	57.55347434	57.42395264	57.42395264	51.42430004	34.71408152	12.10947074	25.39981675
15:31:43.362	0.372385425	0.372385425	4.550103137	8.147775685	19.75085479	19.75085479	25.74272692	32.13851617	48.22098839	55.15183816	61.49982774	57.5620305	57.43246682	57.43246682	51.43134061	34.71842959	12.1117953	25.40297128
15:31:44.333	0.372555205	0.372555205	4.551272767	8.149553238	19.7541831	19.7541831	25.74691589	32.14366641	48.22860145	55.16030134	61.50893524	57.5705166	57.44091125	57.44091125	51.43832347	34.72274202	12.11410089	25.40609993
15:31:45.319	0.372727661	0.372727661	4.5524606	8.151358396	19.75756296	19.75756296	25.75116966	32.14889631	48.23633224	55.16889532	61.51818341	57.57913372	57.44948606	57.44948606	51.44541409	34.727121	12.11644215	25.40927685
15:31:46.289	0.372897368	0.372897368	4.553629262	8.153134363	19.76088804	19.76088804	25.75535441	32.15404133	48.24393751	55.17734968	61.52728128	57.58761077	57.45792146	57.45792146	51.45238938	34.73142875	12.11874543	25.41240207
15:31:47.270	0.373069053	0.373069053	4.554811316	8.154930619	19.76425098	19.76425098	25.75958673	32.15924481	48.25162916	55.1859	61.53648232	57.59618391	57.46645248	57.46645248	51.45944369	34.7357853	12.12107489	25.41556268
15:31:48.240	0.373238862	0.373238862	4.555980222	8.156706838	19.76757629	19.76757629	25.76377161	32.16438993	48.25923451	55.1943543	61.54557998	57.60466069	57.47488759	57.47488759	51.46641865	34.74009284	12.12337824	25.41868771
15:31:49.228	0.373411875	0.373411875	4.557170953	8.158516162	19.77096344	19.77096344	25.76803424	32.16963062	48.2669811	55.20296553	61.55484643	57.61329471	57.48347915	57.48347915	51.47352293	34.74448025	12.1257244	25.42187067
15:31:50.198	0.373581787	0.373581787	4.558340112	8.160292647	19.77428899	19.77428899	25.77221927	32.17477589	48.27458659	55.21141984	61.56394395	57.62177128	57.49191403	57.49191403	51.4804976	34.74878761	12.12802784	25.42499554
15:31:51.178	0.373753503	0.373753503	4.559521442	8.162087568	19.77764893	19.77764893	25.77644749	32.17997423	48.2822705	55.21996124	61.57313511	57.63033508	57.50043569	57.50043569	51.48754398	34.75313926	12.13035505	25.42815252
15:31:52.148	0.373923515	0.373923515	4.560690831	8.163864287	19.78097468	19.78097468	25.7806326	32.18511955	48.28987599	55.22841539	61.58223232	57.6388113	57.5088702	57.5088702	51.49451824	34.75744636	12.13265855	25.43127718
15:31:53.118	0.37409358	0.37409358	4.561860351	8.165641146	19.78430056	19.78430056	25.78481781	32.19026496	48.29748159	55.23686959	61.59132951	57.64728747	57.51730463	57.51730463	51.5014924	34.7617534	12.13496209	25.43440177
15:31:54.104	0.374266501	0.374266501	4.563049276	8.167447428	19.78768139	19.78768139	25.78907207	32.19549525	48.30521261	55.24546312	61.60057656	57.65590324	57.52587796	57.52587796	51.50858136	34.76613133	12.13730366	25.43757777
15:31:55.083	0.374438245	0.374438245	4.564229881	8.169241011	19.79103833	19.79103833	25.7932962	32.20068846	48.31288878	55.25399561	61.60975784	57.6644577	57.53439026	57.53439026	51.51561981	34.77047807	12.13962863	25.44073113
15:31:56.053	0.374608463	0.374608463	4.565399765	8.171018248	19.79436454	19.79436454	25.79748158	32.20583403	48.32049448	55.2624497	61.6188547	57.67293345	57.54282424	57.54282424	51.52259345	34.77478477	12.14193229	25.44385543
15:31:57.024	0.374778906	0.374778906	4.566570959	8.172797417	19.79769425	19.79769425	25.80167129	32.21098488	48.32810796	55.27091235	61.6279607	57.6814177	57.55126666	57.55126666	51.52957401	34.77909576	12.14423833	25.44698282
15:31:58.011	0.374952209	0.374952209	4.567761578	8.174606036	19.80107895	19.80107895	25.8059301	32.21622067	48.33584695	55.27951444	61.63721666	57.69004163	57.55984805	57.55984805	51.53666945	34.78347768	12.14658241	25.45016165
15:31:58.991	0.375124335	0.375124335	4.568943879	8.17640196	19.80443977	19.80443977	25.81015879	32.22141939	48.34353111	55.2880555	61.64640688	57.69860428	57.56836845	57.56836845	51.5437144	34.78782842	12.14890991	25.45331785
15:31:59.962	0.375294931	0.375294931	4.570115433	8.178181501	19.8077698	19.8077698	25.81434866	32.22657038	48.35114467	55.29651802	61.65551252	57.70708808	57.57681038	57.57681038	51.55069442	34.79213905	12.15121605	25.45644494
15:32:00.933	0.375465578	0.375465578	4.571287118	8.179961183	19.81109998	19.81109998	25.81853863	32.23172146	48.35875833	55.30498058	61.66461813	57.71557183	57.58525224	57.58525224	51.55767434	34.79644962	12.15352225	25.45957197
15:33:15.842	0.388782135	0.388782135	4.662026442	8.31761386	20.06831249	20.06831249	26.14192078	32.62921327	48.94614241	55.95763621	62.366652	58.36956954	58.23596987	58.23596987	52.09556217	35.12861186	12.33153613	25.70050264
15:33:16.829	0.38895959	0.38895959	4.663226536	8.31943219	20.0717054	20.0717054	26.14618341	32.63445186	48.95388158	55.96623257	62.37589588	58.37817983	58.24453622	58.24453622	52.10264136	35.1329831	12.33388299	25.70367305
15:33:17.802	0.38913458	0.38913458	4.664409729	8.321224857	20.07505031	20.07505031	26.15038565	32.63961621	48.96151102	55.97470697	62.38500855	58.38666786	58.25298092	58.25298092	52.10961998	35.13729222	12.33619662	25.7067984
15:33:18.771	0.3893089	0.3893089	4.665588157	8.323010249	20.07838153	20.07838153	26.1545706	32.6447593	48.96910899	55.98314636	62.39408349	58.39512073	58.26139062	58.26139062	52.11656963	35.14158344	12.33850075	25.70991077
15:33:19.752	0.38948543	0.38948543	4.666781307	8.32481789	20.08175415	20.08175415	26.15880748	32.64996617	48.97680114	55.99169028	62.40327076	58.40367821	58.26990436	58.26990436	52.12360522	35.14592771	12.34083347	25.71306161
15:33:20.722	0.389660033	0.389660033	4.667961195	8.326605384	20.08508905	20.08508905	26.16299691	32.65511471	48.98440705	56.00013835	62.41235489	58.41213959	58.27832248	58.27832248	52.13056173	35.15022314	12.34314009	25.71617703
15:33:21.709	0.389837747	0.389837747	4.669161874	8.32842432	20.0884825	20.0884825	26.1672598	32.66035351	48.99214624	56.00873437	62.42159804	58.42074907	58.28688792	58.28688792	52.13763995	35.1545937	12.34548717	25.71934694
15:33:22.679	0.39001245	0.39001245	4.670341979	8.330212032	20.09181758	20.09181758	26.17144928	32.66550207	48.99975207	56.01718221	62.43068178	58.42921004	58.29530558	58.29530558	52.144596	35.15888882	12.34779384	25.72246213
15:33:23.659	0.390189005	0.390189005	4.671534372	8.332018303	20.09518716	20.09518716	26.17568203	32.67070378	49.00743635	56.02571712	62.43985906	58.43775812	58.30380989	58.30380989	52.1516236	35.16322811	12.35012435	25.72560936
15:33:24.630	0.390363991	0.390363991	4.672715929	8.333808105	20.0985259	20.0985259	26.17987596	32.67585776	49.01505006	56.03417357	62.44895192	58.44622754	58.31223592	58.31223592	52.15858648	35.16752742	12.3524335	25.72872759
15:33:25.615	0.390541551	0.390541551	4.673914642	8.335623839	20.10191289	20.10191289	26.18413042	32.6810861	49.02277357	56.04275191	62.45817576	58.45481893	58.32078327	58.32078327	52.16564957	35.17188858	12.35477599	25.73189068
15:33:26.585	0.390716459	0.390716459	4.675095221	8.337412048	20.10524843	20.10524843	26.18832016	32.68623489	49.0303795	56.05119959	62.46725903	58.46327936	58.32920032	58.32920032	52.17260493	35.17618322	12.35708286	25.73500553
15:33:27.565	0.390893221	0.390893221	4.67628808	8.339218803	20.10861844	20.10861844	26.19255313	32.69143677	49.0380638	56.05973423	62.47643574	58.47182682	58.33770391	58.33770391	52.17963177	35.18052198	12.35941354	25.73815237
15:33:28.537	0.39106859	0.39106859	4.677471316	8.341010927	20.11196104	20.11196104	26.19675159	32.69659622	49.04568536	56.06819914	62.4855374	58.48030433	58.34613791	58.34613791	52.18660105	35.18482518	12.36172524	25.74127342
15:33:29.522	0.391246357	0.391246357	4.678670489	8.342827134	20.11534844	20.11534844	26.20100624	32.70182471	49.05340884	56.07677717	62.4947606	58.48889503	58.35468449	58.35468449	52.19366331	35.18918579	12.36406789	25.74443611
15:33:30.493	0.391421648	0.391421648	4.679852738	8.344617652	20.11868781	20.11868781	26.20520048	32.70697893	49.06102256	56.08523323	62.5038526	58.4973635	58.36310944	58.36310944	52.20062503	35.1934843	12.36637729	25.74755376
15:33:31.473	0.391598615	0.391598615	4.681046063	8.346424891	20.12205825	20.12205825	26.20943366	32.71218099	49.06870688	56.09376762	62.51302875	58.50591033	58.37161232	58.37161232	52.2076511	35.19782252	12.36870815	25.75070022
15:33:32.444	0.39177401	0.39177401	4.682228551	8.348215664	20.12539786	20.12539786	26.21362804	32.71733535	49.07632068	56.10222363	62.52212054	58.51437856	58.380037	58.380037	52.2146125	35.2021208	12.37101767	25.75381771
15:33:33.432	0.391952524	0.391952524	4.683431841	8.350037881	20.12879599	20.12879599	26.21789585	32.7225799	49.08406765	56.11082748	62.53137121	58.52299476	58.38860885	58.38860885	52.22169546	35.20649413	12.37336762	25.75698963
15:33:34.402	0.39212784	0.39212784	4.684613341	8.351827047	20.13213237	20.13213237	26.22208602	32.72772903	49.09167361	56.11927464	62.54045335	58.53145395	58.39702448	58.39702448	52.2286493	35.21078771	12.37567484	25.76010372
15:33:35.382	0.392305014	0.392305014	4.685807127	8.353634763	20.13550323	20.13550323	26.2263194	32.73293125	49.09935791	56.12780875	62.54962889	58.54000012	58.40552662	58.40552662	52.23567458	35.21512538	12.37800587	25.76324978
15:33:36.352	0.392480431	0.392480431	4.686988855	8.355424164	20.13883981	20.13883981	26.23050967	32.73808045	49.10696385	56.13625576	62.55871073	58.54845899	58.41394188	58.41394188	52.24262802	35.21941869	12.38031317	25.76636367
15:33:37.339	0.392658976	0.392658976	4.68819142	8.357245063	20.14223501	20.14223501	26.23477346	32.74331999	49.11470317	56.14485082	62.56795166	58.55706602	58.42250452	58.42250452	52.2497032	35.22378715	12.38266098	25.76953206
15:33:38.309	0.392834495	0.392834495	4.689373376	8.3590347	20.1455718	20.1455718	26.23896383	32.74846927	49.1223091	56.1532977	62.57703319	58.56552456	58.43091942	58.43091942	52.25665625	35.22808018	12.38496837	25.77264576
15:33:39.276	0.393009522	0.393009522	4.690551789	8.360818919	20.14889838	20.14889838	26.24314129	32.75360267	49.12989151	56.16171837	62.58608649	58.57395678	58.4393081	58.4393081	52.2635876	35.23235981	12.38726867	25.77574973
15:33:40.262	0.393188041	0.393188041	4.691753486	8.362638336	20.15229046	20.15229046	26.24740093	32.75883703	49.13762299	56.17030453	62.59531762	58.58255461	58.44786152	58.44786152	52.27065502	35.23672343	12.38961423	25.77891462
15:33:41.233	0.393363895	0.393363895	4.69293701	8.364430186	20.15563103	20.15563103	26.2515958	32.76399178	49.14523681	56.17875996	62.60440814	58.59102145	58.45628461	58.45628461	52.27761471	35.24102051	12.39192415	25.78203126
15:33:42.219	0.393542517	0.393542517	4.694138935	8.366249837	20.15902331	20.15902331	26.25585552	32.7692262	49.15296825	56.18734594	62.61363894	58.59961893	58.46483763	58.46483763	52.28468171	35.24538384	12.39426979	25.78519595
15:33:43.184	0.393717387	0.393717387	4.695315381	8.36803086	20.16234346	20.16234346	26.2600246	32.77434921	49.16053507	56.19574904	62.62267304	58.60803319	58.47320835	58.47320835	52.29159804	35.24965413	12.39656554	25.78829316
15:33:44.154	0.393893214	0.393893214	4.696498042	8.369821239	20.16568094	20.16568094	26.26421536	32.77949883	49.16814113	56.20419565	62.63175386	58.61649093	58.48162231	58.48162231	52.29855006	35.25394643	12.39887323	25.79140634
15:33:45.139	0.39407181	0.39407181	4.697699096	8.371639407	20.1690701	20.1690701	26.26847092	32.78472807	49.17586474	56.21277273	62.64097486	58.62507921	58.49016611	58.49016611	52.30560931	35.25830493	12.40121663	25.79456753
15:33:46.121	0.394249917	0.394249917	4.698896624	8.373452182	20.17244909	20.17244909	26.27271364	32.7899415	49.18356492	56.22132372	62.65016775	58.63364129	58.49868382	58.49868382	52.31264696	35.26265007	12.40355298	25.79771904
15:33:47.089	0.394425534	0.394425534	4.700077191	8.375239227	20.17578	20.17578	26.27689592	32.79508063	49.1911553	56.22975273	62.65922942	58.64208113	58.5070799	58.5070799	52.31958407	35.26693312	12.40585605	25.80082552
15:33:48.074	0.394604288	0.394604288	4.701278606	8.377057776	20.17916952	20.17916952	26.28115169	32.80031006	49.19887898	56.23832969	62.66845007	58.65066902	58.51562324	58.51562324	52.32664281	35.27129124	12.40819962	25.80398646
15:33:49.045	0.394780553	0.394780553	4.702463073	8.378850618	20.18251101	20.18251101	26.28534708	32.80546527	49.20649297	56.24678477	62.67753963	58.65913479	58.52404508	58.52404508	52.3336011	35.27558734	12.41050995	25.80710241
15:33:50.028	0.394959049	0.394959049	4.703662289	8.380665728	20.18589388	20.18589388	26.28959435	32.8106842	49.21420102	56.25534423	62.68674133	58.66770499	58.53257077	58.53257077	52.34064517	35.27993638	12.41284886	25.81025676
15:33:50.996	0.395134871	0.395134871	4.704843321	8.382453261	20.18922524	20.18922524	26.29377687	32.81582354	49.22179146	56.26377303	62.69580248	58.67614426	58.54096619	58.54096619	52.34758156	35.28421892	12.41515214	25.81336289
15:33:51.983	0.395314197	0.395314197	4.706047658	8.384276011	20.19262212	20.19262212	26.29804156	32.82106383	49.22953092	56.27236725	62.70504139	58.68474908	58.54952627	58.54952627	52.35465394	35.2885854	12.41750068	25.81652991
15:33:52.953	0.395490485	0.395490485	4.70723136	8.386067478	20.19596058	20.19596058	26.30223283	32.82621388	49.23713705	56.28081333	62.71412098	58.69320548	58.55793868	58.55793868	52.36160429	35.29287652	12.41980881	25.81964227
15:33:53.935	0.395669009	0.395669009	4.708429841	8.387881256	20.1993405	20.1993405	26.30647607	32.83142777	49.24483739	56.28936398	62.7233129	58.70176648	58.56645513	58.56645513	52.36864054	35.29722066	12.42214558	25.82279309
15:33:54.904	0.395845218	0.395845218	4.709612558	8.389671123	20.20267575	20.20267575	26.31066316	32.83657263	49.25243572	56.29780127	62.7323829	58.71021391	58.57485857	58.57485857	52.37558337	35.30150711	12.42445143	25.82590207
15:33:55.889	0.39602439	0.39602439	4.710814933	8.391490685	20.20606621	20.20606621	26.31491947	32.84180254	49.26015959	56.3063779	62.74160261	58.71880075	58.58340067	58.58340067	52.38264073	35.30586425	12.42679543	25.82906233
15:33:56.859	0.396200887	0.396200887	4.711999121	8.393282671	20.20940518	20.20940518	26.31911106	32.8469529	49.26776589	56.31482393	62.75068184	58.72725674	58.59181258	58.59181258	52.38959048	35.31015493	12.42910381	25.83217439
15:33:57.840	0.396379433	0.396379433	4.713196828	8.39509506	20.21278205	20.21278205	26.32335015	32.85216159	49.27545829	56.32336548	62.75986369	58.73580828	58.60031951	58.60031951	52.3966187	35.31449404	12.43143835	25.83532158
15:33:58.809	0.396555851	0.396555851	4.714380038	8.396885458	20.21611782	20.21611782	26.32753758	32.85730678	49.28305685	56.33180277	62.76893339	58.74425535	58.6087225	58.6087225	52.40356098	35.31878009	12.43374447	25.83843029
15:33:59.781	0.396732865	0.396732865	4.715567012	8.398681498	20.219464	20.219464	26.33173798	32.86246789	49.29067885	56.34026602	62.77803092	58.75272832	58.61715123	58.61715123	52.4105245	35.32307921	12.43605774	25.84154849
15:35:15.728	0.410727537	0.410727537	4.808700695	8.539440689	20.48135966	20.48135966	26.66024599	33.26604226	49.88646102	57.00161086	63.4887135	59.41456728	59.27545187	59.27545187	52.95425723	35.65870343	12.61703967	26.08501239
15:35:16.708	0.410910272	0.410910272	4.809907683	8.541262815	20.48474544	20.48474544	26.66448977	33.27125488	49.89415313	57.01014701	63.49788351	59.42310648	59.28394427	59.28394427	52.96126998	35.66303115	12.61937859	26.08815234
15:35:17.695	0.411094366	0.411094366	4.811123416	8.543098092	20.48815555	20.48815555	26.66876395	33.27650482	49.90190023	57.01874413	63.50711895	59.43170658	59.2924972	59.2924972	52.96833268	35.66738966	12.6217343	26.09131465
15:35:18.666	0.411275529	0.411275529	4.812319564	8.544903751	20.49151051	20.49151051	26.67296894	33.28166975	49.90952179	57.02720187	63.51620459	59.44016719	59.30091137	59.30091137	52.97528074	35.67167741	12.6240519	26.09442564
15:35:19.637	0.411456743	0.411456743	4.813515823	8.546709528	20.49486559	20.49486559	26.67717399	33.28683472	49.91714334	57.03565955	63.52529008	59.44862764	59.30932536	59.30932536	52.98222862	35.67596502	12.62636956	26.09753654
15:35:20.616	0.411639503	0.411639503	4.814722057	8.548530309	20.49824843	20.49824843	26.68141376	33.29204232	49.9248277	57.04418687	63.53445031	59.45715767	59.31780852	59.31780852	52.98923358	35.68028782	12.62870637	26.10067299
15:35:21.601	0.411823437	0.411823437	4.815935808	8.550362386	20.50165214	20.50165214	26.68567961	33.29728193	49.93255921	57.05276645	63.54366661	59.4657399	59.32634356	59.32634356	52.99628133	35.684637	12.6310576	26.10382861
15:35:22.573	0.412004995	0.412004995	4.81713365	8.552170399	20.50501104	20.50501104	26.68988921	33.30245243	49.94018865	57.06123271	63.5527611	59.4742087	59.33476576	59.33476576	53.00323586	35.68892862	12.63337784	26.10694249
15:35:23.543	0.41218623	0.41218623	4.818329138	8.553974806	20.50836313	20.50836313	26.69409019	33.30761233	49.94780238	57.06968146	63.56183671	59.4826599	59.34317042	59.34317042	53.01017587	35.69321126	12.63569337	26.11004987
15:35:24.523	0.412369386	0.412369386	4.81953707	8.555797945	20.5117499	20.5117499	26.69833457	33.31282551	49.95549462	57.0782173	63.57100578	59.49119813	59.3516616	59.3516616	53.01718728	35.69753793	12.63803284	26.11318921
15:35:25.509	0.412553716	0.412553716	4.820752502	8.557632353	20.5151575	20.5151575	26.70260497	33.31807061	49.96323389	57.08680524	63.58023076	59.4997884	59.36020451	59.36020451	53.02424137	35.7018909	12.64038667	26.11634767
15:35:26.480	0.412735295	0.412735295	4.821949572	8.559438995	20.51851342	20.51851342	26.70681051	33.32323603	49.9708555	57.09526258	63.58931537	59.50824795	59.36861738	59.36861738	53.03118803	35.70617756	12.64270479	26.11945802
15:35:27.451	0.412916922	0.412916922	4.823146738	8.561245731	20.52186939	20.52186939	26.71101605	33.32840143	49.978477	57.10371973	63.5983997	59.51670723	59.37702995	59.37702995	53.03813441	35.71046401	12.64502294	26.12256825
15:35:28.434	0.413100847	0.413100847	4.824358812	8.563074916	20.52526696	20.52526696	26.71527362	33.33363072	49.98619268	57.11228133	63.60759615	59.5252709	59.38554631	59.38554631	53.04516645	35.7148033	12.64736979	26.12571684
15:35:29.403	0.413282203	0.413282203	4.82555373	8.564878158	20.52861623	20.52861623	26.7194706	33.33878556	49.99379842	57.12072088	63.61666143	59.53371241	59.39394115	59.39394115	53.0520981	35.71908061	12.64968327	26.12882047
15:35:30.390	0.413466979	0.413466979	4.826770954	8.56671501	20.53202781	20.53202781	26.72374558	33.34403618	50.0015454	57.12931709	63.6258949	59.54231055	59.40249171	59.40249171	53.0591583	35.7234372	12.65203978	26.13198166
15:35:31.360	0.413648623	0.413648623	4.827967311	8.568520324	20.53538071	20.53538071	26.72794694	33.34919637	50.00915885	57.13776508	63.6349691	59.55076034	59.41089473	59.41089473	53.06609662	35.72771857	12.65435573	26.13508829
15:35:32.339	0.413832005	0.413832005	4.829174891	8.57034252	20.53876485	20.53876485	26.73218738	33.35440451	50.01684299	57.14629145	63.6441274	59.55928845	59.41937558	59.41937558	53.07309918	35.73203955	12.65669325	26.13822367
15:35:33.311	0.414014124	0.414014124	4.830373926	8.572151772	20.54212485	20.54212485	26.73639747	33.35957538	50.02447202	57.15475661	63.65321989	59.56775527	59.42779546	59.42779546	53.08005135	35.73632939	12.65901408	26.1413365
15:35:34.297	0.414198918	0.414198918	4.831590337	8.573987192	20.54553332	20.54553332	26.74066824	33.36482073	50.03221088	57.16334358	63.66244313	59.57634382	59.43633636	59.43633636	53.08710341	35.74068085	12.66136838	26.14449405
15:35:35.267	0.414380763	0.414380763	4.832787114	8.575792936	20.54888659	20.54888659	26.74486974	33.36998099	50.0398241	57.17179108	63.6715165	59.58479281	59.44473845	59.44473845	53.0940408	35.74496153	12.66368452	26.14760026
15:35:36.246	0.414564345	0.414564345	4.833995092	8.57761553	20.55227103	20.55227103	26.74911023	33.37518911	50.04750784	57.18031678	63.68067378	59.59331993	59.45321819	59.45321819	53.10104227	35.74928171	12.66602218	26.15073516
15:35:37.218	0.414746664	0.414746664	4.835194531	8.579425188	20.55563134	20.55563134	26.7533204	33.38035998	50.05513654	57.18878134	63.68976532	59.60178582	59.46163701	59.46163701	53.10799341	35.75357081	12.66834316	26.15384753
15:35:38.205	0.414931847	0.414931847	4.836412577	8.581262869	20.55904357	20.55904357	26.75759555	33.38561063	50.06288285	57.19737634	63.69899689	59.61038209	59.47018546	59.47018546	53.11505153	35.75792589	12.67069999	26.1570078
15:35:39.174	0.415113703	0.415113703	4.837608511	8.583067138	20.56239366	20.56239366	26.76179276	33.39076553	50.07048781	57.20581444	63.70805986	59.61882136	59.47857775	59.47857775	53.12198067	35.76220135	12.67301388	26.16011032
15:35:40.155	0.415297858	0.415297858	4.838819342	8.584893832	20.56578527	20.56578527	26.76604191	33.3959842	50.07818677	57.21435679	63.71723473	59.6273648	59.4870736	59.4870736	53.12899528	35.76652953	12.67535643	26.16325111
15:35:41.126	0.415480188	0.415480188	4.840017942	8.586702021	20.56914242	20.56914242	26.7702478	33.40114972	50.08580723	57.22281198	63.72631591	59.635821	59.49548266	59.49548266	53.13593819	35.77081343	12.67767516	26.1663598
15:35:42.113	0.41566557	0.41566557	4.841236374	8.588540078	20.57255491	20.57255491	26.77452295	33.40640027	50.09355304	57.23140619	63.73554632	59.64441616	59.50402987	59.50402987	53.14299513	35.77516765	12.6800321	26.16951954
15:35:43.083	0.415847807	0.415847807	4.842433902	8.590346549	20.57590864	20.57590864	26.77872441	33.4115603	50.10116523	57.23985209	63.74461738	59.6528629	59.51242948	59.51242948	53.14993015	35.77944663	12.68234844	26.1726247
15:35:44.063	0.416031974	0.416031974	4.84364389	8.592171765	20.57929707	20.57929707	26.78296925	33.41677359	50.10885591	57.24838501	63.75378181	59.6613966	59.5209155	59.5209155	53.15693648	35.78376958	12.68468873	26.17576178
15:35:45.034	0.416214497	0.416214497	4.844842846	8.593980289	20.5826544	20.5826544	26.78717506	33.42193891	50.11647573	57.25683927	63.76286169	59.66985154	59.52932319	59.52932319	53.16387809	35.78805256	12.68700752	26.17886989
15:35:46.003	0.41639669	0.41639669	4.846039411	8.595785157	20.58600483	20.58600483	26.79137215	33.4270935	50.12407965	57.26527581	63.77192247	59.67828869	59.53771315	59.53771315	53.17080503	35.79232646	12.68932153	26.18197144
15:35:46.989	0.416582132	0.416582132	4.847257086	8.597621814	20.58941417	20.58941417	26.79564294	33.43233859	50.13181698	57.27386032	63.78114208	59.68687372	59.54625015	59.54625015	53.17785332	35.79667521	12.69167621	26.18512731
15:35:47.968	0.416766303	0.416766303	4.848466183	8.599445481	20.59279927	20.59279927	26.79988331	33.43754629	50.13949906	57.28238348	63.79029574	59.69539733	59.55472603	59.55472603	53.18485111	35.80099277	12.69401413	26.18826058
15:35:48.938	0.416948829	0.416948829	4.849664252	8.601252464	20.5961533	20.5961533	26.80408467	33.44270606	50.14711036	57.29082804	63.79936491	59.70384226	59.56312363	59.56312363	53.19178424	35.8052704	12.69633058	26.1913649
15:35:49.924	0.417134415	0.417134415	4.850882177	8.603089342	20.59956271	20.59956271	26.80835532	33.4479509	50.15484707	57.29941169	63.80858336	59.71242618	59.57165943	59.57165943	53.19883142	35.80961837	12.69868525	26.19452028
15:35:50.895	0.417317224	0.417317224	4.85208165	8.604898341	20.60292026	20.60292026	26.81256094	33.45311584	50.16246584	57.30786442	63.81766116	59.72087912	59.58006495	59.58006495	53.20577099	35.81389992	12.7010041	26.19762748
15:35:51.876	0.417501965	0.417501965	4.853293565	8.606726052	20.60631243	20.60631243	26.81680984	33.45833392	50.17016291	57.31640397	63.82683211	59.72941878	59.58855667	59.58855667	53.21278169	35.81822532	12.70334683	26.20076654
15:35:52.847	0.417684867	0.417684867	4.854493198	8.608535192	20.60967002	20.60967002	26.82101535	33.4634987	50.17778125	57.32485612	63.83590913	59.73787097	59.59696139	59.59696139	53.21972052	35.82250636	12.70566567	26.20387341
15:35:53.833	0.417870643	0.417870643	4.855711444	8.610372348	20.6130795	20.6130795	26.82528577	33.46874316	50.18551706	57.33343853	63.84512596	59.74645334	59.60549551	59.60549551	53.22676615	35.82685325	12.70802032	26.2070281
15:35:54.802	0.418053264	0.418053264	4.856908777	8.612177915	20.61643024	20.61643024	26.82948255	33.47389715	50.19311935	57.34187275	63.85418357	59.75488743	59.61388218	59.61388218	53.23368999	35.83112498	12.71033439	26.21012827
15:35:55.784	0.418238381	0.418238381	4.858122241	8.614007757	20.61982592	20.61982592	26.83373553	33.47912015	50.20082334	57.35041974	63.86336221	59.76343421	59.62238086	59.62238086	53.24070627	35.83545372	12.71267948	26.21326982
15:35:56.754	0.418421283	0.418421283	4.859320961	8.615815315	20.62318014	20.62318014	26.8379365	33.48427925	50.20843299	57.35886202	63.87242833	59.77187619	59.63077531	59.63077531	53.24763647	35.83972931	12.71499591	26.21637283
15:35:57.727	0.418604796	0.418604796	4.860523466	8.617628529	20.62654474	20.62654474	26.84215041	33.48945421	50.21606596	57.3673301	63.88152208	59.7803439	59.63919531	59.63919531	53.25458771	35.84401785	12.7173195	26.21948527
15:35:58.712	0.418790619	0.418790619	4.861740868	8.619464153	20.62995081	20.62995081	26.84641618	33.49469284	50.22379275	57.37590221	63.89072747	59.78891555	59.64771864	59.64771864	53.26162421	35.84835897	12.71967171	26.22263588
15:35:59.677	0.418972715	0.418972715	4.862933629	8.621262573	20.63328774	20.63328774	26.85059527	33.499825	50.23136242	57.38429996	63.89974555	59.79731277	59.6560685	59.6560685	53.26851746	35.85261169	12.72197615	26.22572236
15:37:15.124	0.433361849	0.433361849	4.956493733	8.762173946	20.89440323	20.89440323	27.17738726	33.90106367	50.82294386	58.04041931	64.60410481	60.4531328	60.30812006	60.30812006	53.80669082	36.18454725	12.90223618	26.46669565
15:37:16.110	0.433552043	0.433552043	4.957721418	8.764020907	20.89782118	20.89782118	27.18166212	33.90631125	50.83067816	58.04899503	64.61330809	60.46170113	60.31663845	60.31663845	53.81371976	36.18888151	12.90459482	26.46984301
15:37:17.089	0.433740943	0.433740943	4.958940521	8.765854902	20.90121503	20.90121503	27.18590676	33.91152171	50.83835767	58.05750994	64.62244604	60.47020862	60.32509633	60.32509633	53.82069872	36.19318492	12.9069368	26.472968
15:37:18.059	0.433928161	0.433928161	4.960148547	8.767672182	20.90457782	20.90457782	27.19011249	33.91668438	50.8459667	58.06594665	64.63149998	60.47863787	60.33347643	60.33347643	53.82761346	36.1974487	12.90925732	26.47606423
15:37:19.046	0.434118715	0.434118715	4.96137787	8.769521446	20.90799969	20.90799969	27.19439203	33.92193762	50.85370915	58.07453123	64.64071254	60.48721478	60.3420033	60.3420033	53.83464926	36.2017871	12.91161857	26.47921466
15:37:20.016	0.43430604	0.43430604	4.962586138	8.771338985	20.91136273	20.91136273	27.19859794	33.92710045	50.86131828	58.08296793	64.64976632	60.49564385	60.35038318	60.35038318	53.84156373	36.20605067	12.91393921	26.48231078
15:37:20.998	0.434495739	0.434495739	4.963809492	8.773179164	20.91476754	20.91476754	27.20285602	33.93232729	50.8690217	58.09150911	64.65893216	60.50417722	60.35886674	60.35886674	53.84856371	36.21036693	12.91628865	26.48544518
15:37:21.967	0.43468298	0.43468298	4.965016767	8.774995106	20.9181274	20.9181274	27.20705781	33.93748499	50.87662316	58.0999372	64.66797655	60.5125975	60.36723786	60.36723786	53.85547086	36.21462593	12.91860703	26.48853802
15:37:22.939	0.434870854	0.434870854	4.966227903	8.776816803	20.92149778	20.92149778	27.21127271	33.94265875	50.88424823	58.10839139	64.67704889	60.52104378	60.37563482	60.37563482	53.86239928	36.21889802	12.92093266	26.49164038
15:37:23.909	0.435058394	0.435058394	4.96743666	8.778634868	20.92486133	20.92486133	27.21547899	33.94782191	50.89185762	58.11682814	64.68610244	60.52947254	60.38401434	60.38401434	53.86931328	36.22316119	12.92325354	26.49473629
15:37:24.905	0.435251016	0.435251016	4.968677948	8.780501808	20.92831519	20.92831519	27.21979813	33.95312357	50.89967106	58.12549107	64.69539862	60.53812717	60.39261841	60.39261841	53.8764125	36.22753855	12.92563671	26.49791514
15:37:25.873	0.435438278	0.435438278	4.969884462	8.782316396	20.93167207	20.93167207	27.22399593	33.95827627	50.90726491	58.13391047	64.70443339	60.54653842	60.4009805	60.4009805	53.88331202	36.23179274	12.92795294	26.50100457
15:37:26.845	0.435626366	0.435626366	4.971096077	8.784138603	20.93504293	20.93504293	27.22821116	33.96345031	50.91489016	58.14236463	64.7135054	60.55498429	60.40937701	60.40937701	53.89023989	36.23606439	12.93027878	26.5041067
15:37:27.816	0.435814312	0.435814312	4.972306559	8.785959053	20.93841043	20.93841043	27.23242211	33.96861907	50.92250758	58.15081004	64.72256794	60.56342134	60.41776473	60.41776473	53.89716047	36.24033151	12.93260228	26.50720557
15:37:28.812	0.436007153	0.436007153	4.973548333	8.787826509	20.94186475	20.94186475	27.23674157	33.973921	50.93032118	58.1594729	64.73186373	60.57207552	60.4263683	60.4263683	53.9042591	36.24470839	12.93498566	26.51038416
15:37:29.783	0.436195206	0.436195206	4.974759049	8.789647207	20.94523247	20.94523247	27.24095266	33.97908987	50.93793864	58.16791825	64.74092605	60.58051232	60.43475575	60.43475575	53.91117936	36.24897527	12.93730925	26.51348289
15:37:30.753	0.43638312	0.43638312	4.975968644	8.791466165	20.94859685	20.94859685	27.24515952	33.98425353	50.94554835	58.17635493	64.74997901	60.58894038	60.4431345	60.4431345	53.91809239	36.25323767	12.93963052	26.51657838
15:37:31.723	0.436571083	0.436571083	4.977178336	8.793285217	20.95196129	20.95196129	27.24936639	33.98941715	50.95315796	58.18479145	64.75903171	60.59736818	60.45151299	60.45151299	53.92500517	36.25749988	12.94195179	26.51967376
15:37:32.719	0.436764141	0.436764141	4.978420583	8.795153169	20.95541605	20.95541605	27.25368613	33.99471928	50.96097163	58.19345415	64.76832703	60.60602182	60.46011599	60.46011599	53.93210313	36.26187625	12.94433536	26.52285206
15:37:33.689	0.436952211	0.436952211	4.979630512	8.796972473	20.95878072	20.95878072	27.25789315	33.99988304	50.96858132	58.20189063	64.77737955	60.6144494	60.46849423	60.46849423	53.93901562	36.26613823	12.94665674	26.52594732
15:37:34.659	0.437140332	0.437140332	4.980840547	8.798791882	20.96214547	20.96214547	27.2621002	34.0050468	50.97619096	58.21032701	64.78643188	60.62287678	60.47687227	60.47687227	53.94592788	36.27040005	12.94897815	26.52904248
15:37:35.629	0.437328506	0.437328506	4.982050699	8.800611416	20.96551033	20.96551033	27.26630734	34.01021063	50.98380065	58.21876337	64.79548411	60.63130406	60.48525019	60.48525019	53.95284001	36.27466176	12.9512996	26.53213757
15:37:36.609	0.437518671	0.437518671	4.983273429	8.80244981	20.96890995	20.96890995	27.27055786	34.01542768	50.99148872	58.22728658	64.80462946	60.63981799	60.49371426	60.49371426	53.95982316	36.27896723	12.95364501	26.53526448
15:37:37.581	0.437707335	0.437707335	4.984486289	8.804273309	20.9722819	20.9722819	27.27477374	34.02060218	50.99911401	58.23574013	64.81369999	60.64826224	60.50210904	60.50210904	53.96674911	36.28323741	12.95597131	26.53836577
15:37:38.566	0.437898575	0.437898575	4.985715475	8.806121302	20.97569904	20.97569904	27.27904603	34.02584588	51.00684124	58.24430662	64.82289163	60.65681923	60.51061589	60.51061589	53.97376746	36.28756454	12.95832874	26.54150844
15:37:39.537	0.438087148	0.438087148	4.986927298	8.807943137	20.97906768	20.97906768	27.28325764	34.03101507	51.0144586	58.25275126	64.83195244	60.6652544	60.51900162	60.51900162	53.98068585	36.29183001	12.96065269	26.54460635
15:37:40.517	0.438277522	0.438277522	4.988150464	8.809781973	20.98246764	20.98246764	27.28750833	34.0362322	51.02214655	58.26127409	64.84109709	60.67376759	60.52746491	60.52746491	53.98766817	36.29613487	12.96299822	26.54773289
15:37:41.492	0.438466976	0.438466976	4.989367502	8.811611542	20.98585035	20.98585035	27.29173739	34.04142274	51.02979528	58.26975338	64.85019494	60.68223718	60.53588485	60.53588485	53.99461468	36.30041763	12.96533182	26.5508434
15:37:42.478	0.438658618	0.438658618	4.990598363	8.813461838	20.98927126	20.98927126	27.29601415	34.04667179	51.03753016	58.27832811	64.85939512	60.69080202	60.54439947	60.54439947	54.00163927	36.3047485	12.96769174	26.55398887
15:37:43.449	0.438847396	0.438847396	4.991810604	8.815284091	20.9926402	20.9926402	27.30022587	34.05184099	51.04514733	58.28677229	64.86845515	60.69923636	60.55278435	60.55278435	54.00855676	36.30901332	12.97001579	26.55708639
15:37:44.431	0.439038366	0.439038366	4.993036692	8.817127105	20.99604741	20.99604741	27.30448536	34.05706879	51.05285078	58.29531207	64.87761768	60.7077661	60.56126406	60.56126406	54.01555244	36.31332632	12.9723662	26.56021893
15:37:45.400	0.439226855	0.439226855	4.994246633	8.818945795	20.99940953	20.99940953	27.30868843	34.0622273	51.06045209	58.30373855	64.88665856	60.71618257	60.56963116	60.56963116	54.02245518	36.31758198	12.97468547	26.56330984
15:37:46.385	0.43941851	0.43941851	4.995476666	8.820794632	21.00282726	21.00282726	27.31296095	34.06747102	51.0681789	58.3123041	64.89584859	60.72473785	60.57813625	60.57813625	54.02947171	36.32190778	12.97704309	26.56645172
15:37:47.357	0.439607685	0.439607685	4.996690562	8.82261916	21.00619994	21.00619994	27.31717709	34.0726455	51.07580364	58.32075643	64.90491707	60.73317997	60.58652882	60.58652882	54.03639537	36.3261763	12.97936959	26.56955201
15:37:48.338	0.439798664	0.439798664	4.997915802	8.824460686	21.00960391	21.00960391	27.32143228	34.0778679	51.08349892	58.3292869	64.91406931	60.74170003	60.59499888	60.59499888	54.0433829	36.33048418	12.98171765	26.57268091
15:37:49.306	0.43998716	0.43998716	4.999124896	8.826277894	21.01296282	21.01296282	27.32563108	34.08302103	51.0910921	58.33770413	64.92309998	60.75010689	60.6033564	60.6033564	54.05027755	36.33473476	12.9840346	26.57576821
15:37:50.291	0.440179017	0.440179017	5.000355315	8.828127096	21.01638074	21.01638074	27.32990359	34.0882646	51.09881848	58.34626896	64.93228892	60.75866108	60.61186037	60.61186037	54.05729296	36.33905977	12.98639222	26.57890959
15:37:51.261	0.440368003	0.440368003	5.001567103	8.829948246	21.0197467	21.0197467	27.33411107	34.09342833	51.10642716	58.35470325	64.94133776	60.7670848	60.62023463	60.62023463	54.06420133	36.34331876	12.98871397	26.58200305
15:37:52.243	0.440559376	0.440559376	5.002793973	8.831792007	21.02315433	21.02315433	27.33837058	34.09865588	51.11412983	58.36324167	64.95049822	60.77561242	60.62871218	60.62871218	54.07119485	36.34763023	12.99106443	26.58513463
15:37:53.212	0.440748266	0.440748266	5.004004695	8.83361145	21.02651689	21.02651689	27.34257369	34.10381419	51.12173042	58.37166688	64.95953715	60.78402688	60.63707722	60.63707722	54.07809552	36.35188442	12.99338378	26.58822464
15:37:54.198	0.440940519	0.440940519	5.00523675	8.835462896	21.02993848	21.02993848	27.34685053	34.10906293	51.12946421	58.38023968	64.96873435	60.79258865	60.6455887	60.6455887	54.08511694	36.35621303	12.99574381	26.59136873
15:37:55.170	0.441130092	0.441130092	5.006451405	8.837288142	21.03331153	21.03331153	27.35106663	34.11423711	51.13708808	58.38869056	64.97780069	60.80102856	60.65397904	60.65397904	54.09203838	36.36047999	12.99807033	26.59446805
15:37:56.137	0.44131874	0.44131874	5.007659911	8.839104096	21.03666729	21.03666729	27.35526105	34.11938465	51.14467265	58.39709784	64.98682016	60.80942483	60.66232598	60.66232598	54.09892398	36.36472482	13.0003849	26.59755131
15:37:57.121	0.441510753	0.441510753	5.008889747	8.840952047	21.04008206	21.04008206	27.35952917	34.12462259	51.15239038	58.40565265	64.99599784	60.81796835	60.6708193	60.6708193	54.10593027	36.36904403	13.00274013	26.60068863
15:37:58.107	0.441703204	0.441703204	5.010122167	8.842803827	21.04350378	21.04350378	27.36380592	34.12987109	51.16012361	58.41422457	65.0051938	60.82652886	60.67932951	60.67932951	54.11295046	36.37337178	13.00510013	26.60383217
15:37:59.078	0.441892778	0.441892778	5.011335929	8.844627519	21.04687348	21.04687348	27.36801758	34.13503969	51.16773905	58.42266588	65.01424956	60.83495884	60.68770995	60.68770995	54.11986354	36.37763348	13.00742422	26.60692776
15:38:00.061	0.442084743	0.442084743	5.01256478	8.846473829	21.05028485	21.05028485	27.37228126	34.14027209	51.17544846	58.43121129	65.02341692	60.84349267	60.69619362	60.69619362	54.12686174	36.38194763	13.00977702	26.61006146
15:39:15.540	0.456981733	0.456981733	5.107244402	8.988563985	21.31245082	21.31245082	27.69976931	34.54205641	51.76730632	59.08706487	65.7267798	61.49816242	61.34701558	61.34701558	54.66357949	36.71274382	13.19048942	26.85040529
15:39:16.520	0.4571773	0.4571773	5.108478551	8.990413999	21.31585935	21.31585935	27.70402492	34.54727597	51.77499369	59.09558105	65.73590995	61.50665927	61.35546268	61.35546268	54.67054367	36.71703517	13.19283751	26.853524
15:39:17.491	0.457371125	0.457371125	5.109701484	8.992247146	21.31923667	21.31923667	27.70824152	34.55244765	51.78261051	59.104019	65.74495617	61.51507798	61.36383211	61.36383211	54.67744376	36.721287	13.19516406	26.85661401
15:39:18.477	0.457568	0.457568	5.110943429	8.994108736	21.32266627	21.32266627	27.71252333	34.55769927	51.79034504	59.11258729	65.75414204	61.52362662	61.37233072	61.37233072	54.6844503	36.72560441	13.19752659	26.85975169
15:39:19.447	0.457761736	0.457761736	5.112165356	8.995940266	21.32604037	21.32604037	27.7167358	34.5628658	51.79795421	59.12101664	65.76317889	61.53203654	61.38069143	61.38069143	54.69134311	36.72985171	13.19985085	26.86283844
15:39:20.429	0.457957922	0.457957922	5.113402511	8.997794565	21.32945629	21.32945629	27.72100042	34.56809626	51.80565751	59.12955021	65.77232739	61.54055033	61.38915541	61.38915541	54.698321	36.73415142	13.20220387	26.8659633
15:39:21.399	0.458151766	0.458151766	5.114624675	8.999626341	21.33283059	21.33283059	27.72521304	34.57326288	51.81326678	59.13797954	65.78136408	61.54896003	61.39751592	61.39751592	54.70521354	36.73839851	13.20452819	26.86904994
15:39:22.369	0.458345662	0.458345662	5.11584695	9.00145823	21.33620497	21.33620497	27.72942571	34.57842954	51.82087605	59.14640882	65.79040063	61.55736958	61.40587629	61.40587629	54.7121059	36.74264548	13.20685252	26.87213651
15:39:23.354	0.458542613	0.458542613	5.117088255	9.003318584	21.33963166	21.33963166	27.73370362	34.58367617	51.82860309	59.1549685	65.7995769	61.5659091	61.41436589	61.41436589	54.71910476	36.74695805	13.20921284	26.87527077
15:39:24.337	0.458739218	0.458739218	5.118327155	9.00517528	21.34305148	21.34305148	27.73797291	34.58891219	51.83631446	59.16351076	65.80873441	61.57443115	61.42283812	61.42283812	54.72608925	36.75126173	13.2115684	26.8783986
15:39:25.307	0.458933277	0.458933277	5.119549793	9.007007549	21.34642618	21.34642618	27.74218582	34.59407902	51.84392391	59.17194006	65.81777076	61.5828404	61.43119823	61.43119823	54.73298125	36.75550841	13.21389283	26.88148501
15:39:26.278	0.459127589	0.459127589	5.1207738	9.008841815	21.34980444	21.34980444	27.74640312	34.59925119	51.8515412	59.18037797	65.82681628	61.59125814	61.4395668	61.4395668	54.73988018	36.75975933	13.21621968	26.88457453
15:39:27.260	0.459324155	0.459324155	5.122011787	9.010696976	21.35322106	21.35322106	27.75066825	34.60448198	51.8592448	59.18891143	65.83596414	61.59977109	61.44803002	61.44803002	54.74685708	36.76405828	13.2185729	26.88769897
15:39:28.242	0.459520778	0.459520778	5.123249906	9.012552279	21.3566378	21.3566378	27.7549335	34.60971287	51.86694851	59.19744495	65.84511199	61.608284	61.45649322	61.45649322	54.75383392	36.76835716	13.22092618	26.89082339
15:39:29.213	0.45971525	0.45971525	5.124474258	9.014386899	21.36001633	21.36001633	27.75915098	34.61488514	51.87456587	59.20588276	65.85415717	61.61670133	61.4648614	61.4648614	54.76073238	36.77260773	13.22325309	26.89391271
15:39:30.185	0.459909976	0.459909976	5.125699989	9.01622353	21.36339844	21.36339844	27.76337289	34.62006279	51.88219112	59.21432925	65.86321158	61.62512721	61.4732381	61.4732381	54.7676378	36.77686257	13.22558243	26.89700515
15:39:31.166	0.46010656	0.46010656	5.126937189	9.018077291	21.36681197	21.36681197	27.76763395	34.62528843	51.88988703	59.22285394	65.87234974	61.63363099	61.48169227	61.48169227	54.77460703	36.78115671	13.22793337	26.90012617
15:39:32.134	0.46030059	0.46030059	5.128158097	9.019906588	21.37018032	21.37018032	27.77183858	34.63044482	51.89748091	59.23126556	65.88136662	61.64202188	61.4900342	61.4900342	54.7814837	36.78539378	13.23025315	26.90320574
15:39:33.121	0.460498482	0.460498482	5.129403082	9.021771903	21.37361486	21.37361486	27.77612579	34.63570243	51.90522384	59.23984221	65.89056034	61.65057729	61.49853971	61.49853971	54.78849515	36.78971389	13.23261848	26.90634568
15:39:34.092	0.460693218	0.460693218	5.130627994	9.023607089	21.37699381	21.37699381	27.78034353	34.64087482	51.91284125	59.24827976	65.89960486	61.65899383	61.50690718	61.50690718	54.79539276	36.79396383	13.23494547	26.90943463
15:39:35.072	0.460889814	0.460889814	5.131864376	9.025459404	21.38040416	21.38040416	27.78460043	34.64609518	51.92052928	59.25679547	65.90873311	61.66748824	61.51535208	61.51535208	54.80235415	36.79825305	13.23729406	26.91255216
15:39:36.042	0.461084454	0.461084454	5.133088244	9.027292917	21.38377977	21.38377977	27.78881392	34.65126226	51.92813882	59.26522419	65.91776802	61.67589576	61.5237106	61.5237106	54.80924428	36.80249834	13.23961868	26.91563777
15:39:37.012	0.461279149	0.461279149	5.134312233	9.029126555	21.38715548	21.38715548	27.79302749	34.6564294	51.93574841	59.2736529	65.92680286	61.68430318	61.53206904	61.53206904	54.8161343	36.80674354	13.24194333	26.91872334
15:39:38.000	0.461477509	0.461477509	5.135559037	9.030994318	21.39059389	21.39059389	27.79731926	34.6616924	51.94349916	59.28223789	65.93600513	61.69286638	61.54058236	61.54058236	54.82315193	36.81106734	13.24431111	26.92186606
15:39:38.964	0.461671102	0.461671102	5.13677566	9.032816815	21.39394884	21.39394884	27.80150681	34.66682755	51.9510616	59.29061426	65.94498371	61.70122137	61.5488887	61.5488887	54.8299989	36.81528597	13.24662138	26.92493236
15:39:39.952	0.461869568	0.461869568	5.138022679	9.034684788	21.39738738	21.39738738	27.80579864	34.67209054	51.95881228	59.29919905	65.95418562	61.70978415	61.55740164	61.55740164	54.83701611	36.81960948	13.24898917	26.9280749
15:39:40.922	0.462064469	0.462064469	5.139247081	9.036518827	21.40076332	21.40076332	27.8100123	34.67725762	51.96642169	59.30762731	65.96321968	61.7181907	61.56575927	61.56575927	54.84390525	36.82385405	13.25131382	26.93116009
15:39:41.908	0.46226264	0.46226264	5.140491801	9.038383245	21.40419506	21.40419506	27.81429554	34.68250998	51.97415668	59.3161946	65.97240269	61.72673582	61.57425467	61.57425467	54.8509079	36.82816854	13.25367684	26.93429612
15:39:42.875	0.462457042	0.462457042	5.141712626	9.040211817	21.40756069	21.40756069	27.81849622	34.68766107	51.9817425	59.32459661	65.98140845	61.73511596	61.58258608	61.58258608	54.85777533	36.83239969	13.2559943	26.93737159
15:39:43.862	0.462655517	0.462655517	5.142958807	9.042078313	21.41099599	21.41099599	27.82278381	34.69291868	51.98948517	59.33317228	65.99060029	61.74366922	61.59108961	61.59108961	54.86478457	36.8367182	13.25835969	26.94051058
15:39:44.832	0.462850627	0.462850627	5.144183635	9.04391277	21.41437219	21.41437219	27.82699759	34.69808575	51.99709447	59.34160018	65.99963366	61.75207499	61.59944652	61.59944652	54.87167291	36.8409622	13.26068435	26.94359543
15:39:45.817	0.463048804	0.463048804	5.145427494	9.045775676	21.41780063	21.41780063	27.83127651	34.70333265	52.00482132	59.3501582	66.00880643	61.76061042	61.60793236	61.60793236	54.87866747	36.84527162	13.26304492	26.94672785
15:39:46.797	0.463246028	0.463246028	5.14666515	9.047629237	21.42121174	21.42121174	27.83553375	34.70855292	52.01250894	59.3586727	66.01793248	61.76910235	61.61637496	61.61637496	54.88562634	36.84955903	13.26539353	26.94984429
15:39:47.768	0.463441492	0.463441492	5.147891535	9.049465861	21.42459155	21.42459155	27.83975189	34.7137252	52.02012585	59.36710884	66.02697446	61.77751602	61.62473977	61.62473977	54.89252104	36.85380688	13.26772055	26.95293199
15:39:48.738	0.463636806	0.463636806	5.149116766	9.051300704	21.42796796	21.42796796	27.84396573	34.71889217	52.02773492	59.37553623	66.036007	61.78592085	61.63309581	61.63309581	54.89940845	36.85805023	13.27004518	26.95601644
15:39:49.707	0.463831969	0.463831969	5.150340826	9.053133739	21.43134091	21.43134091	27.84817522	34.72405375	52.03533604	59.38395475	66.04502995	61.79431674	61.64144297	61.64144297	54.9062885	36.86228901	13.27236739	26.95909759
15:39:50.703	0.464032621	0.464032621	5.151599087	9.055017934	21.43480787	21.43480787	27.85250197	34.72935908	52.04314883	59.39260764	66.05430402	61.80294625	61.65002242	61.65002242	54.91335995	36.8666457	13.27475428	26.96226446
15:39:51.673	0.464228088	0.464228088	5.152824611	9.05685305	21.4381844	21.4381844	27.85671581	34.73452593	52.05075766	59.40103457	66.06333584	61.81135031	61.65837773	61.65837773	54.92024662	36.87088852	13.27707886	26.96534859
15:39:52.643	0.464423604	0.464423604	5.154050228	9.058688252	21.44156095	21.44156095	27.86092965	34.73969272	52.05836638	59.40946132	66.07236739	61.81975409	61.66673279	61.66673279	54.92713302	36.87513116	13.27940343	26.9684326
15:39:53.613	0.46461917	0.46461917	5.155275935	9.060523533	21.44493753	21.44493753	27.86514346	34.74485943	52.06597498	59.41788788	66.08139866	61.82815756	61.67508756	61.67508756	54.93401913	36.87937359	13.28172796	26.97151648
15:39:54.609	0.464820031	0.464820031	5.156534599	9.062408105	21.44840466	21.44840466	27.86947022	34.75016461	52.07378745	59.42654016	66.09067179	61.83678603	61.68366605	61.68366605	54.94108957	36.88372958	13.28411479	26.97468292
15:39:55.579	0.465015698	0.465015698	5.157760496	9.06424356	21.4517813	21.4517813	27.87368402	34.75533121	52.08139585	59.43496637	66.09970254	61.84518895	61.6920203	61.6920203	54.94797515	36.88797164	13.28643929	26.97776657
15:39:56.550	0.465211618	0.465211618	5.15898776	9.066081008	21.45516148	21.45516148	27.87790218	34.76050314	52.08901206	59.44340117	66.10874241	61.85360032	61.70038297	61.70038297	54.95486761	36.89221793	13.28876617	26.98085331
15:39:57.520	0.465407385	0.465407385	5.160213844	9.067916634	21.45853818	21.45853818	27.88211595	34.76566963	52.09662026	59.45182703	66.11777265	61.86200267	61.7087367	61.7087367	54.96175266	36.89645963	13.29109062	26.98393673
15:39:58.517	0.465608653	0.465608653	5.161474155	9.069803447	21.4620089	21.4620089	27.88644701	34.77097989	52.10444014	59.46048726	66.12705398	61.87063863	61.71732269	61.71732269	54.96882908	36.90081921	13.29347975	26.98710586
15:39:59.487	0.46580452	0.46580452	5.162700425	9.07163924	21.46538565	21.46538565	27.89066075	34.77614626	52.11204811	59.46891275	66.13608366	61.8790404	61.72567587	61.72567587	54.97571356	36.90506053	13.29580415	26.99018903
15:40:00.458	0.466000638	0.466000638	5.163928046	9.073477001	21.46876589	21.46876589	27.8948788	34.78131787	52.11966378	59.4773467	66.14512234	61.8874505	61.73403735	61.73403735	54.98260484	36.909306	13.29813091	26.99327526
15:41:15.840	0.481381454	0.481381454	5.25953469	9.216432475	21.73131204	21.73131204	28.22236419	35.18269844	52.710698	60.13169521	66.84616528	62.53961587	62.38250138	62.38250138	55.51688645	37.2383996	13.47871265	27.23256333
15:41:16.810	0.481581424	0.481581424	5.260769113	9.218276056	21.73469272	21.73469272	28.22657946	35.18786301	52.71830264	60.14011203	66.85517985	62.54800022	62.39083922	62.39083922	55.52375402	37.24262899	13.48103602	27.23563927
15:41:17.791	0.481783716	0.481783716	5.262017653	9.220140665	21.73811184	21.73811184	28.23084261	35.19308618	52.72599358	60.14862429	66.86429656	62.55647953	62.39927152	62.39927152	55.53069934	37.24690625	13.48338575	27.23875004
15:41:18.773	0.481986267	0.481986267	5.263267568	9.222007269	21.74153447	21.74153447	28.23511011	35.19831463	52.73369229	60.15714509	66.87342236	62.56496724	62.40771221	62.40771221	55.5376515	37.2511877	13.48573784	27.24186389
15:41:19.741	0.482185985	0.482185985	5.264499782	9.223847384	21.7449084	21.7449084	28.23931684	35.20346859	52.74128131	60.16554443	66.88241799	62.57333384	62.41603249	62.41603249	55.54450444	37.25540803	13.48805642	27.24493329
15:41:20.727	0.482389468	0.482389468	5.265755009	9.225721808	21.74834511	21.74834511	28.2436018	35.20871833	52.74901137	60.17409981	66.89158066	62.58185575	62.42450725	62.42450725	55.55148456	37.25970667	13.49041808	27.24805967
15:41:21.692	0.482588671	0.482588671	5.266983611	9.227556418	21.75170868	21.75170868	28.24779554	35.21385627	52.75657681	60.18247291	66.90054805	62.59019599	62.43280138	62.43280138	55.55831585	37.26391364	13.49272944	27.25111939
15:41:22.677	0.482792054	0.482792054	5.268237776	9.229429143	21.755142	21.755142	28.2520762	35.21910065	52.76429897	60.19101941	66.90970107	62.59870884	62.44126719	62.44126719	55.56528849	37.26820763	13.49508868	27.25424242
15:41:23.649	0.482992807	0.482992807	5.269475503	9.231277267	21.75853008	21.75853008	28.25630042	35.22427584	52.77191924	60.19945309	66.91873318	62.60710918	62.44962115	62.44962115	55.57216895	37.27244484	13.49741678	27.25732417
15:41:24.634	0.483196299	0.483196299	5.270729892	9.233150213	21.76196353	21.76196353	28.26058117	35.22952022	52.77964141	60.20799947	66.92788592	62.61562168	62.45808667	62.45808667	55.57914123	37.27673858	13.49977601	27.26044705
15:41:25.600	0.483395918	0.483395918	5.271960194	9.234987139	21.76533082	21.76533082	28.26477938	35.23466345	52.78721463	60.21638094	66.93686198	62.6239698	62.46638875	62.46638875	55.58597886	37.28094938	13.50208973	27.26350962
15:41:26.572	0.483596828	0.483596828	5.273198237	9.236835568	21.76871906	21.76871906	28.26900368	35.23983859	52.79483483	60.22481434	66.94589358	62.63236955	62.4747422	62.4747422	55.59285873	37.28518618	13.50441779	27.26659112
15:41:27.559	0.483800893	0.483800893	5.274455495	9.238712629	21.77215965	21.77215965	28.2732932	35.24509359	52.80257261	60.23337781	66.9550644	62.64089872	62.48322439	62.48322439	55.59984459	37.28948823	13.50678177	27.26972009
15:41:28.540	0.484003769	0.484003769	5.27570521	9.240578372	21.77557936	21.77557936	28.27755665	35.25031659	52.81026329	60.24188908	66.96417925	62.64937579	62.4916548	62.4916548	55.60678773	37.29376396	13.50913136	27.27282994
15:41:29.510	0.484204424	0.484204424	5.276941026	9.242423309	21.7789608	21.7789608	28.28177234	35.25548104	52.81786775	60.25030488	66.97319178	62.65775766	62.49999056	62.49999056	55.61365288	37.29799164	13.5114546	27.27590485
15:41:30.480	0.48440513	0.48440513	5.278176938	9.244268334	21.78234228	21.78234228	28.28598804	35.26064545	52.82547214	60.25872054	66.98220408	62.66613927	62.50832609	62.50832609	55.62051778	37.30221915	13.51377782	27.27897966
15:41:31.465	0.484608994	0.484608994	5.279432076	9.246142004	21.78577611	21.78577611	28.29026897	35.26588973	52.83319414	60.26726628	66.99135563	62.67465034	62.51679039	62.51679039	55.62748868	37.30651192	13.51613696	27.28210195
15:41:32.447	0.484812289	0.484812289	5.28068349	9.24801006	21.78919952	21.78919952	28.29453687	35.27111799	52.84089255	60.27578586	67.00047907	62.68313523	62.52522868	62.52522868	55.63443811	37.31079145	13.51848889	27.28521462
15:41:33.417	0.485013154	0.485013154	5.281919727	9.249855404	21.79258118	21.79258118	28.29875267	35.27628238	52.84849692	60.2842013	67.00949092	62.6915163	62.53356375	62.53356375	55.64130247	37.31501858	13.52081209	27.2882892
15:41:34.386	0.485213863	0.485213863	5.283154787	9.251698936	21.79595939	21.79595939	28.30296412	35.28144141	52.85609338	60.29260792	67.01849327	62.69988847	62.54189001	62.54189001	55.64815952	37.31924119	13.52313287	27.29136051
15:41:35.373	0.485418353	0.485418353	5.284412891	9.253576809	21.79940039	21.79940039	28.30725382	35.28669623	52.86383089	60.30117058	67.02766262	62.70841593	62.55037072	62.55037072	55.65514372	37.32354208	13.52549674	27.29448876
15:41:36.338	0.485618337	0.485618337	5.285643059	9.255412931	21.80276475	21.80276475	28.31144793	35.29183392	52.87139592	60.3095423	67.03662745	62.71675313	62.55866224	62.55866224	55.66197206	37.32774698	13.52780791	27.29754722
15:41:37.324	0.485822725	0.485822725	5.286900095	9.257289098	21.80620235	21.80620235	28.3157333	35.29708335	52.8791255	60.31809605	67.04578712	62.72527149	62.56713396	62.56713396	55.66894874	37.33204321	13.53016935	27.30067212
15:41:38.294	0.486023848	0.486023848	5.288136835	9.259134919	21.80958422	21.80958422	28.31994916	35.30224758	52.8867296	60.32651089	67.05479797	62.73365141	62.57546802	62.57546802	55.675812	37.33626959	13.53249246	27.30374622
15:41:39.280	0.486228344	0.486228344	5.289394089	9.261011301	21.81302195	21.81302195	28.3242346	35.30749701	52.89445916	60.33506448	67.06395732	62.74216939	62.58393941	62.58393941	55.68278831	37.34056556	13.53485388	27.30687096
15:41:40.244	0.486428327	0.486428327	5.290623389	9.262845907	21.81638301	21.81638301	28.32842443	35.31262926	52.90201617	60.34342709	67.0729121	62.75049707	62.59222157	62.59222157	55.68960873	37.34476552	13.5371626	27.30992588
15:41:41.230	0.486632926	0.486632926	5.291880839	9.264722471	21.81982081	21.81982081	28.33270986	35.31787859	52.90974557	60.35198038	67.08207098	62.75901453	62.6006925	62.6006925	55.69658455	37.34906115	13.53952397	27.3130504
15:41:42.216	0.486837581	0.486837581	5.293138407	9.266599152	21.82325868	21.82325868	28.33699536	35.32312793	52.91747499	60.36053364	67.09122976	62.76753184	62.60916331	62.60916331	55.70356022	37.35335668	13.54188536	27.31617486
15:41:43.185	0.487038756	0.487038756	5.294374378	9.268443551	21.82663728	21.82663728	28.34120692	35.32828668	52.925071	60.36893921	67.10023032	62.77590198	62.61748776	62.61748776	55.71041531	37.35757794	13.54420598	27.31924532
15:41:44.168	0.487242893	0.487242893	5.295628327	9.270314723	21.8300648	21.8300648	28.34547941	35.33352	52.93277683	60.37746623	67.10936086	62.78439294	62.62593241	62.62593241	55.71736933	37.3618601	13.54656015	27.32236009
15:41:45.137	0.487444172	0.487444172	5.296864499	9.272159312	21.83344348	21.83344348	28.349691	35.33867868	52.94037273	60.38587156	67.11836101	62.79276262	62.63425646	62.63425646	55.72422399	37.36608107	13.54888074	27.32543036
15:41:46.123	0.487649037	0.487649037	5.298122477	9.274036384	21.83688154	21.83688154	28.35397653	35.34392789	52.94810194	60.39442433	67.12751897	62.801279	62.64272645	62.64272645	55.73119876	37.37037598	13.55124205	27.32855443
15:41:47.093	0.487850627	0.487850627	5.299360129	9.275883073	21.84026381	21.84026381	28.3581925	35.34909184	52.9557056	60.40283811	67.13652803	62.80965688	62.6510587	62.6510587	55.73806007	37.374601	13.55356501	27.33162768
15:41:48.075	0.488054766	0.488054766	5.300613208	9.277752725	21.843688	21.843688	28.36246067	35.3543197	52.96340335	60.41135595	67.14564845	62.81813826	62.65949391	62.65949391	55.74500611	37.37887819	13.55591671	27.33473889
15:41:49.044	0.488256251	0.488256251	5.301849782	9.279597697	21.84706686	21.84706686	28.3666723	35.35947825	52.97099904	60.41976079	67.15464779	62.82650701	62.66781714	62.66781714	55.75185989	37.38309855	13.55823723	27.33780878
15:41:50.015	0.488458205	0.488458205	5.303089019	9.281446587	21.85045277	21.85045277	28.37089266	35.36464745	52.97861042	60.42818293	67.16366559	62.83489289	62.67615742	62.67615742	55.75872764	37.38732751	13.56056255	27.34088493
15:41:50.985	0.488660001	0.488660001	5.304327071	9.283293657	21.85383522	21.85383522	28.37510866	35.36981127	52.98621386	60.43659622	67.17267384	62.84326984	62.68448885	62.68448885	55.76558807	37.39155193	13.56288544	27.34395779
15:41:51.980	0.488867052	0.488867052	5.305597134	9.285188428	21.85730487	21.85730487	28.37943332	35.37510813	52.9940132	60.44522621	67.18191404	62.85186245	62.69303479	62.69303479	55.77262507	37.39588507	13.56526818	27.34710975
15:41:52.950	0.489068953	0.489068953	5.306835394	9.287035697	21.86068742	21.86068742	28.38364935	35.3802719	53.00161655	60.45363928	67.19092191	62.86023898	62.70136583	62.70136583	55.77948508	37.4001092	13.56759104	27.35018244
15:41:53.922	0.489271321	0.489271321	5.308076299	9.28888686	21.86407696	21.86407696	28.38787407	35.38544625	53.00923549	60.46206953	67.19994811	62.8686325	62.70971381	62.70971381	55.78635898	37.40434187	13.56991867	27.35326135
15:41:54.893	0.489473531	0.489473531	5.309316021	9.290736203	21.86746304	21.86746304	28.39209442	35.39061522	53.01684649	60.47049094	67.20896476	62.87701711	62.71805294	62.71805294	55.79322554	37.40857002	13.57224388	27.35633697
15:41:55.875	0.489678084	0.489678084	5.310569887	9.292606593	21.87088752	21.87088752	28.39636258	35.39584271	53.02454365	60.47900762	67.21808335	62.88549647	62.72648633	62.72648633	55.80016966	37.4128459	13.5745954	27.35944734
15:41:56.861	0.489883524	0.489883524	5.311828973	9.294484711	21.87432602	21.87432602	28.40064817	35.40109149	53.03227216	60.48755893	67.22723894	62.89401018	62.73495391	62.73495391	55.80714189	37.41713908	13.57695651	27.3625703
15:41:57.830	0.490085473	0.490085473	5.31306644	9.29633053	21.87770525	21.87770525	28.40485985	35.40624971	53.0398673	60.49596261	67.2362364	62.90237682	62.74327524	62.74327524	55.81399364	37.42135805	13.57927688	27.36563929
15:41:58.800	0.49028768	0.49028768	5.314305275	9.298178334	21.88108799	21.88108799	28.40907585	35.41141317	53.04747017	60.50437477	67.24524287	62.9107518	62.75160487	62.75160487	55.82085218	37.4255812	13.58159961	27.36871133
15:41:59.780	0.490492023	0.490492023	5.315556983	9.300045287	21.88450565	21.88450565	28.41333533	35.41662984	53.05515137	60.51287355	67.25434199	62.91921289	62.76002018	62.76002018	55.82778121	37.42984773	13.58394627	27.37181495
15:43:15.502	0.506441329	0.506441329	5.412589081	9.444609957	22.14874823	22.14874823	28.74250853	35.81965171	53.64853871	61.16923454	67.95685118	63.57235191	63.40966981	63.40966981	56.36254817	37.75909017	13.76525588	27.61134564
15:43:16.487	0.506650927	0.506650927	5.413855634	9.446494912	22.15218852	22.15218852	28.74679196	35.82489464	53.65625746	61.17777008	67.96598406	63.58084168	63.41811456	63.41811456	56.36949781	37.76336846	13.76761491	27.61445843
15:43:17.458	0.506857598	0.506857598	5.415104288	9.448353179	22.15557997	22.15557997	28.75101453	35.83006303	53.66386647	61.18618421	67.97498697	63.58921058	63.42643909	63.42643909	56.37634848	37.7675858	13.76994043	27.6175269
15:43:18.438	0.50706624	0.50706624	5.416364636	9.4502288	22.15900296	22.15900296	28.7552763	35.83527939	53.67154607	61.19467633	67.98407325	63.59765697	63.43484069	63.43484069	56.38326253	37.77184215	13.77228753	27.62062375
15:43:19.424	0.507276215	0.507276215	5.417632816	9.452116023	22.16244699	22.16244699	28.75956422	35.84052771	53.6792727	61.20322041	67.99321505	63.60615494	63.4432936	63.4432936	56.39021876	37.77612447	13.77464903	27.62373949
15:43:20.393	0.507482621	0.507482621	5.418879226	9.453970803	22.1658317	22.1658317	28.7637782	35.8456855	53.68686603	61.21161702	68.00219901	63.61450615	63.45160053	63.45160053	56.39705483	37.78033279	13.77696981	27.6268014
15:43:21.366	0.507689935	0.507689935	5.420130908	9.455833377	22.1692305	22.1692305	28.76800968	35.85086467	53.69449081	61.22004836	68.01122005	63.6228918	63.45994172	63.45994172	56.40391904	37.78455844	13.77930023	27.62987592
15:43:22.346	0.507898794	0.507898794	5.421391699	9.457709456	22.17265381	22.17265381	28.77227161	35.85608109	53.7021704	61.22854024	68.0203058	63.63133758	63.46834272	63.46834272	56.41083244	37.78881436	13.78164741	27.63297247
15:43:23.316	0.508105577	0.508105577	5.422639742	9.459566518	22.17604229	22.17604229	28.77649012	35.86124433	53.70977168	61.23694548	68.02929877	63.63969709	63.47665791	63.47665791	56.41767517	37.79302676	13.78397069	27.63603736
15:43:24.302	0.508315824	0.508315824	5.42390848	9.461454321	22.17948674	22.17948674	28.78077824	35.86649273	53.71749832	61.24548927	68.03843992	63.64819431	63.48511008	63.48511008	56.42463059	37.79730853	13.7863323	27.63915272
15:43:25.273	0.508522926	0.508522926	5.425158024	9.463313517	22.18287887	22.18287887	28.78500116	35.8716613	53.72510741	61.25390302	68.04744187	63.65656211	63.49343351	63.49343351	56.43148003	37.80152505	13.788658	27.64222061
15:43:26.254	0.508732216	0.508732216	5.426420557	9.465191988	22.18630603	22.18630603	28.78926764	35.87688314	53.73279491	61.26240342	68.05653645	63.66501599	63.50184257	63.50184257	56.4383999	37.80578491	13.7910077	27.64532003
15:43:27.224	0.508939211	0.508939211	5.427669029	9.467049491	22.18969482	22.18969482	28.79348628	35.8820464	53.74039614	61.27080836	68.06552884	63.67337484	63.51015711	63.51015711	56.44524193	37.80999686	13.79333104	27.6483846
15:43:28.211	0.509149893	0.509149893	5.428939516	9.468939696	22.19314313	22.19314313	28.79777896	35.88730026	53.74813071	61.27936069	68.07467884	63.68188018	63.51861736	63.51861736	56.45220384	37.81428258	13.79569517	27.65150285
15:43:29.182	0.509357211	0.509357211	5.430189507	9.47079936	22.1965356	22.1965356	28.80200207	35.89246892	53.75573985	61.28777426	68.08368032	63.69024743	63.52694025	63.52694025	56.45905267	37.81849869	13.79802098	27.65457045
15:43:30.147	0.509563301	0.509563301	5.431431884	9.472647647	22.1999072	22.1999072	28.80619912	35.89760567	53.76330197	61.2961358	68.09262606	63.69856284	63.53521157	63.53521157	56.46585904	37.82268865	13.80033244	27.65761902
15:43:31.132	0.509773713	0.509773713	5.432700101	9.474534327	22.2033487	22.2033487	28.81048313	35.90284881	53.77102071	61.30467044	68.10175693	63.70705031	63.54365405	63.54365405	56.47280619	37.82696527	13.80269179	27.66073066
15:43:32.104	0.509981408	0.509981408	5.433951721	9.476396269	22.20674494	22.20674494	28.81471074	35.9080229	53.77863776	61.31309259	68.11076739	63.71542583	63.55198516	63.55198516	56.47966168	37.83118545	13.80502009	27.66380122
15:43:33.090	0.510192148	0.510192148	5.435221479	9.478285141	22.21019018	22.21019018	28.81899928	35.91327152	53.78636451	61.32163598	68.11990748	63.72392182	63.56043609	63.56043609	56.48661572	37.8354663	13.80738194	27.66691593
15:43:34.057	0.510398879	0.510398879	5.436466869	9.480137716	22.21356909	22.21356909	28.82320519	35.91841898	53.79394232	61.33001463	68.12887125	63.73225389	63.56872398	63.56872398	56.49343556	37.83966452	13.80969829	27.66997053
15:43:35.044	0.51060994	0.51060994	5.437738127	9.482028721	22.21701797	22.21701797	28.82749812	35.92367291	53.80167685	61.33856649	68.13802027	63.74075812	63.57718312	63.57718312	56.50039627	37.84394945	13.81206257	27.67308821
15:43:36.015	0.510817635	0.510817635	5.43898889	9.483889191	22.22041102	22.22041102	28.83172151	35.9288417	53.80928601	61.34697969	68.14702087	63.74912437	63.585505	63.585505	56.507244	37.84816483	13.81438855	27.67615529
15:43:37.000	0.511028378	0.511028378	5.4402578	9.485776604	22.22385309	22.22385309	28.83600584	35.93408504	53.81700489	61.35551414	68.15615112	63.75761111	63.59394673	63.59394673	56.51419031	37.85244088	13.81674809	27.67926652
15:43:37.966	0.511235109	0.511235109	5.441502338	9.487627718	22.22722883	22.22722883	28.84020755	35.93922724	53.82457486	61.36388389	68.1651051	63.76593398	63.60222546	63.60222546	56.52100245	37.85663433	13.81906214	27.68231765
15:43:38.953	0.511446389	0.511446389	5.442774045	9.489519193	22.23067804	22.23067804	28.84450065	35.94448125	53.8323094	61.37243554	68.17425361	63.77443763	63.61068401	63.61068401	56.52796253	37.86091884	13.82142652	27.68543503
15:43:39.923	0.511654086	0.511654086	5.444023966	9.491378216	22.23406796	22.23406796	28.84871987	35.94964482	53.83991077	61.38083989	68.18324448	63.78279473	63.61899678	63.61899678	56.53480261	37.86512948	13.82375022	27.68849867
15:43:40.906	0.511864618	0.511864618	5.445290743	9.49326226	22.23750336	22.23750336	28.85299565	35.95487758	53.84761398	61.38935678	68.19235567	63.79126365	63.62742077	63.62742077	56.54173416	37.86939641	13.82610508	27.69160327
15:43:41.874	0.512071993	0.512071993	5.446538302	9.495117672	22.24088644	22.24088644	28.85720624	35.96003052	53.85519966	61.39774366	68.20132771	63.7996032	63.63571607	63.63571607	56.54855979	37.87359814	13.82842403	27.69466042
15:43:42.860	0.512283278	0.512283278	5.447809173	9.497007707	22.24433252	22.24433252	28.86149517	35.96527931	53.86292641	61.40628647	68.21046648	63.8080977	63.64416551	63.64416551	56.55551221	37.87787791	13.83078613	27.69777436
15:43:43.831	0.512491402	0.512491402	5.449060815	9.498869095	22.24772624	22.24772624	28.86571887	35.97044823	53.87053557	61.41469921	68.21946605	63.81646278	63.6524862	63.6524862	56.56235866	37.88209243	13.83311231	27.70084083
15:43:44.812	0.512701725	0.512701725	5.450325466	9.500749781	22.25115501	22.25115501	28.86998614	35.97567045	53.87822315	61.42319859	68.22855823	63.82491393	63.6608925	63.6608925	56.56927551	37.88635029	13.8354625	27.70393882
15:43:45.782	0.512909741	0.512909741	5.451576032	9.502609474	22.25454539	22.25454539	28.87420555	35.98083407	53.88582445	61.43160252	68.23754823	63.83327008	63.6692043	63.6692043	56.57611456	37.89056025	13.83778633	27.70700197
15:43:46.753	0.513118025	0.513118025	5.452828002	9.504471205	22.25793936	22.25793936	28.87842937	35.98600305	53.89343362	61.44001509	68.24654741	63.84163473	63.67752456	63.67752456	56.58296053	37.89477446	13.84011259	27.71006821
15:43:47.739	0.513329583	0.513329583	5.454099429	9.506361823	22.26138586	22.26138586	28.8827185	35.99125192	53.90116037	61.4485576	68.25568553	63.8501285	63.68597323	63.68597323	56.58991213	37.89905369	13.84247483	27.71318175
15:43:48.718	0.513539692	0.513539692	5.455361934	9.508239124	22.26480795	22.26480795	28.88697719	35.99646352	53.90883222	61.45703936	68.26475858	63.85856177	63.69436173	63.69436173	56.59681418	37.9033024	13.84482031	27.7162731
15:43:49.688	0.513747923	0.513747923	5.456612941	9.510099278	22.26819867	22.26819867	28.89119676	36.00162722	53.91643353	61.46544307	68.27374808	63.86691735	63.70267295	63.70267295	56.60365261	37.90751195	13.84714425	27.71933594
15:43:50.674	0.513959645	0.513959645	5.457884703	9.511990247	22.27164543	22.27164543	28.89548601	36.00687615	53.92416027	61.47398541	68.2828858	63.87541068	63.71112117	63.71112117	56.61060372	37.91179086	13.84950657	27.72244925
15:43:51.644	0.514167983	0.514167983	5.459135928	9.51385063	22.27503631	22.27503631	28.89970565	36.01203988	53.93176157	61.482389	68.29187503	63.88376596	63.71943208	63.71943208	56.61744182	37.91600019	13.85183057	27.72551194
15:43:52.622	0.514378095	0.514378095	5.460397591	9.515726487	22.27845526	22.27845526	28.90396017	36.01724625	53.93942563	61.49086191	68.30093835	63.89219008	63.72781145	63.72781145	56.62433621	37.92024416	13.85417377	27.72859984
15:43:53.591	0.514586326	0.514586326	5.461647748	9.517585186	22.28184283	22.28184283	28.90817555	36.02240471	53.94701911	61.49925675	68.30991808	63.90053649	63.73611352	63.73611352	56.63116696	37.92444896	13.85649543	27.73165922
15:43:54.562	0.514795039	0.514795039	5.462900589	9.51944783	22.28523745	22.28523745	28.91239966	36.02757381	53.95462824	61.50766883	68.31891619	63.90889996	63.74443255	63.74443255	56.63801163	37.92866231	13.85882191	27.73472484
15:43:55.550	0.515007462	0.515007462	5.464175481	9.52134321	22.28869161	22.28869161	28.91669778	36.03283345	53.96237062	61.51622815	68.32807174	63.91740974	63.7528971	63.7528971	56.644976	37.93294935	13.86118915	27.73784406
15:43:56.514	0.515214778	0.515214778	5.465419511	9.523192659	22.29206194	22.29206194	28.92089152	36.03796533	53.96992491	61.52457949	68.33700475	63.92571265	63.76115588	63.76115588	56.65177102	37.93713213	13.86349891	27.74088743
15:43:57.501	0.515427095	0.515427095	5.466693331	9.525086346	22.29551276	22.29551276	28.92518535	36.04321966	53.97765942	61.53313001	68.34615073	63.93421349	63.76961153	63.76961153	56.65872799	37.94141459	13.86586381	27.74400332
15:43:58.471	0.515635807	0.515635807	5.467945313	9.526947523	22.29890421	22.29890421	28.92940524	36.04838349	53.98526067	61.54153315	68.35513901	63.94256773	63.77792135	63.77792135	56.66556494	37.94562317	13.86818799	27.74706545
15:43:59.459	0.515848448	0.515848448	5.469220649	9.528843368	22.3023587	22.3023587	28.9337035	36.05364319	53.99300303	61.55009222	68.36429401	63.95107691	63.78638528	63.78638528	56.67252864	37.94990976	13.87055534	27.75018435
15:45:15.057	0.532274307	0.532274307	5.567085356	9.674182506	22.56680804	22.56680804	29.26252521	36.45594008	54.5850906	62.20446815	69.06402777	64.6013913	64.43319824	64.43319824	57.20459422	38.27741624	14.05170373	27.98846304
15:45:16.036	0.532488951	0.532488951	5.568355835	9.676067526	22.57023304	22.57023304	29.26678091	36.46114586	54.59275084	62.21293212	69.07307582	64.60979972	64.44156058	64.44156058	57.21147187	38.28164959	14.054049	27.99154275
15:45:17.007	0.532701888	0.532701888	5.569615999	9.677937199	22.57363004	22.57363004	29.27100173	36.46630896	54.60034823	62.22132658	69.08204951	64.61813902	64.44985416	64.44985416	57.21829294	38.28584812	14.05637507	27.99459712
15:45:17.994	0.532918383	0.532918383	5.570897014	9.679837762	22.57708305	22.57708305	29.27529205	36.47155705	54.60807065	62.22985914	69.09117075	64.62661544	64.45828408	64.45828408	57.22522611	38.29011564	14.05873946	27.99770167
15:45:18.962	0.533130761	0.533130761	5.572153454	9.681701822	22.58046961	22.58046961	29.27949974	36.47670405	54.61564427	62.23822723	69.10011612	64.6349284	64.46655141	64.46655141	57.23202554	38.29430084	14.06105835	28.00074632
15:45:19.942	0.533345822	0.533345822	5.573425553	9.683589071	22.58389818	22.58389818	29.28375954	36.48191477	54.62331162	62.24669883	69.10917206	64.64334411	64.47492089	64.47492089	57.23890896	38.29853775	14.06340598	28.00382857
15:45:20.913	0.533558956	0.533558956	5.574686048	9.685459061	22.58729527	22.58729527	29.28798014	36.48707754	54.63090835	62.25509236	69.11814449	64.6516822	64.48321316	64.48321316	57.24572884	38.30273554	14.06573203	28.00688236
15:45:21.884	0.533772143	0.533772143	5.575946646	9.687329161	22.59069244	22.59069244	29.29220077	36.49224032	54.63850506	62.26348581	69.12711676	64.66002013	64.49150524	64.49150524	57.25254855	38.30693322	14.06805813	28.00993606
15:45:22.869	0.533988454	0.533988454	5.577225504	9.689226306	22.59413862	22.59413862	29.2964822	36.49747744	54.64621113	62.27200003	69.13621808	64.66847798	64.49991655	64.49991655	57.25946628	38.31119124	14.07041776	28.01303364
15:45:23.848	0.5342035	0.5342035	5.578496669	9.691111994	22.59756387	22.59756387	29.30073754	36.50268264	54.65387017	62.28046225	69.14526373	64.67688408	64.50827637	64.50827637	57.26634165	38.31542318	14.07276305	28.01611224
15:45:24.820	0.534417057	0.534417057	5.579758824	9.692984275	22.60096464	22.60096464	29.30496239	36.50785053	54.66147427	62.2888637	69.15424438	64.68522976	64.51657607	64.51657607	57.27316754	38.31962468	14.07509155	28.01916867
15:45:25.789	0.534630003	0.534630003	5.581017165	9.694850855	22.60435493	22.60435493	29.30917415	36.51300238	54.66905474	62.29723899	69.16319699	64.69354938	64.52484982	64.52484982	57.27997207	38.32381302	14.07741287	28.02221553
15:45:26.775	0.53484674	0.53484674	5.582297691	9.696750298	22.6078048	22.6078048	29.31345982	36.51824463	54.67676817	62.30576114	69.17230651	64.7020148	64.53326856	64.53326856	57.28689581	38.32807473	14.07977495	28.02531576
15:45:27.756	0.535062428	0.535062428	5.583571803	9.698640186	22.61123718	22.61123718	29.31772369	36.5234602	54.6844423	62.31423981	69.1813695	64.71043697	64.54164424	64.54164424	57.29378411	38.33231464	14.08212505	28.02840011
15:45:28.727	0.53527597	0.53527597	5.584833032	9.700510921	22.61463467	22.61463467	29.32194413	36.52862262	54.69203818	62.32263197	69.19033994	64.71877314	64.54993436	64.54993436	57.30060203	38.33651122	14.08445124	28.03145292
15:45:29.698	0.535489562	0.535489562	5.586094348	9.702381742	22.61803218	22.61803218	29.32616452	36.53378497	54.69963392	62.33102392	69.19931011	64.72710903	64.55822418	64.55822418	57.30741967	38.34070763	14.08677743	28.03450561
15:45:30.684	0.535706505	0.535706505	5.587375241	9.704281556	22.62148223	22.62148223	29.33045008	36.53902702	54.70734688	62.33954534	69.20841859	64.73557344	64.56664179	64.56664179	57.31434238	38.34496871	14.08913957	28.03760533
15:45:31.650	0.535919102	0.535919102	5.588630261	9.706142954	22.6248624	22.6248624	29.33464876	36.54416277	54.71490339	62.34789385	69.21734218	64.74386605	64.5748885	64.5748885	57.32112452	38.34914327	14.09145385	28.04064209
15:45:32.622	0.536133069	0.536133069	5.589893163	9.708016001	22.62826359	22.62826359	29.33887347	36.54933036	54.72250671	62.35629402	69.22632094	64.75220989	64.58318614	64.58318614	57.32794852	38.3533436	14.09378251	28.04369759
15:45:33.608	0.536350168	0.536350168	5.591174342	9.709916112	22.63171381	22.63171381	29.343159	36.55457231	54.73021939	62.36481496	69.23542872	64.76067363	64.59160298	64.59160298	57.33487052	38.35760425	14.09614472	28.04679695
15:45:34.588	0.536566004	0.536566004	5.592447852	9.711804804	22.63514318	22.63514318	29.34741853	36.55978245	54.73788523	62.37328409	69.24448106	64.76908584	64.59996855	64.59996855	57.34175033	38.36183893	14.09849263	28.04987742
15:45:35.558	0.536779689	0.536779689	5.593708457	9.713674315	22.6385376	22.6385376	29.35163457	36.56493939	54.74547273	62.38166663	69.25344077	64.77741197	64.60824848	64.60824848	57.34855969	38.36603024	14.10081661	28.05292632
15:45:36.544	0.53699695	0.53699695	5.594989951	9.715574762	22.64198806	22.64198806	29.35592014	36.57018135	54.75318528	62.39018728	69.26254804	64.7858752	64.61666472	64.61666472	57.35548113	38.37029054	14.10317893	28.0560254
15:45:37.514	0.53721074	0.53721074	5.59625076	9.717444492	22.64538263	22.64538263	29.36013621	36.57533828	54.76077269	62.39856961	69.27150741	64.79420099	64.62494425	64.62494425	57.36229011	38.37448163	14.10550298	28.05907411
15:45:38.499	0.537427887	0.537427887	5.59753116	9.719343231	22.64882975	22.64882975	29.36441745	36.58057491	54.76847733	62.40708139	69.28060507	64.80265528	64.63335154	64.63335154	57.36920413	38.37873737	14.10786298	28.06216985
15:45:39.465	0.537640901	0.537640901	5.598786975	9.72120547	22.65221049	22.65221049	29.36861616	36.58571058	54.77603336	62.41542896	69.28952716	64.81094641	64.64159654	64.64159654	57.37598467	38.38291095	14.11017752	28.0652058
15:45:40.451	0.537858376	0.537858376	5.600068884	9.723106361	22.65566127	22.65566127	29.37290178	36.59095254	54.78374574	62.42394919	69.29863372	64.81940895	64.65001197	64.65001197	57.38290534	38.38717078	14.11254	28.06830448
15:45:41.422	0.538072598	0.538072598	5.601331403	9.724978458	22.65905966	22.65905966	29.37712225	36.59611479	54.79134079	62.43233977	69.30760164	64.82774265	64.65829924	64.65829924	57.38972059	38.39136573	14.1148666	28.07135596
15:45:42.404	0.538289302	0.538289302	5.602608337	9.726871886	22.66249665	22.66249665	29.38139057	36.60133556	54.7990219	62.44082535	69.31667105	64.83617065	64.66668025	64.66668025	57.39661291	38.39560811	14.11721961	28.07444192
15:45:43.373	0.538503189	0.538503189	5.603868469	9.728740359	22.66588823	22.66588823	29.3856024	36.60648722	54.80660128	62.4491985	69.32562022	64.84448691	64.67495011	64.67495011	57.4034138	38.39979422	14.11954151	28.07748694
15:45:44.344	0.538717571	0.538717571	5.605131309	9.730612805	22.66928689	22.66928689	29.38982296	36.61164953	54.81419629	62.45758887	69.33458773	64.85282021	64.68323688	64.68323688	57.41022857	38.40398887	14.12186825	28.08053816
15:45:45.330	0.538935319	0.538935319	5.606413759	9.732514286	22.67273814	22.67273814	29.39410872	36.61689159	54.82190857	62.46610873	69.34369358	64.86128205	64.69165145	64.69165145	57.41714841	38.4082482	14.12423097	28.08363641
15:45:46.309	0.539151577	0.539151577	5.607687225	9.734402403	22.676165	22.676165	29.39836412	36.6220965	54.82956615	62.47456812	69.35273472	64.86968376	64.70000618	64.70000618	57.42401902	38.41247723	14.12657699	28.0867126
15:45:47.279	0.539365901	0.539365901	5.608949097	9.736273288	22.67956048	22.67956048	29.40258045	36.6272536	54.83715336	62.48294971	69.36169266	64.87800814	64.70828399	64.70828399	57.43082635	38.41666731	14.1289015	28.08976045
15:45:48.250	0.5395805	0.5395805	5.610212376	9.738146217	22.68295954	22.68295954	29.40680115	36.63241604	54.84474837	62.49133987	69.37065969	64.88634096	64.71657015	64.71657015	57.43764053	38.4208616	14.13122845	28.09281136
15:45:49.236	0.539798468	0.539798468	5.61149528	9.740048202	22.68641122	22.68641122	29.4110871	36.63765826	54.85246071	62.49985958	69.37976512	64.89480239	64.72498416	64.72498416	57.44455982	38.4251206	14.1335914	28.09590931
15:45:50.218	0.54001561	0.54001561	5.612773106	9.741942614	22.68984903	22.68984903	29.41535574	36.6428793	54.86014184	62.50834477	69.38883359	64.90322946	64.73336397	64.73336397	57.45145096	38.42936227	14.13594485	28.09899465
15:45:51.183	0.540229047	0.540229047	5.614028923	9.743804355	22.69322743	22.69322743	29.41955053	36.64801	54.86769001	62.51668303	69.39774497	64.91151054	64.74159859	64.74159859	57.45822268	38.43353044	14.13825762	28.10202651
15:45:52.168	0.540446962	0.540446962	5.615310873	9.745704797	22.69667594	22.69667594	29.42383228	36.65324705	54.87539459	62.52519403	69.40684089	64.91996311	64.75000369	64.75000369	57.46513458	38.43778489	14.14061837	28.10512111
15:45:53.138	0.540661616	0.540661616	5.61657343	9.747576449	22.70007209	22.70007209	29.42804893	36.65840446	54.88298197	62.5335755	69.41579832	64.92828697	64.75828077	64.75828077	57.47194117	38.44197452	14.14294325	28.10816855
15:45:54.123	0.540879645	0.540879645	5.617855631	9.749477179	22.70352088	22.70352088	29.43233085	36.6636417	54.89068673	62.54208657	69.42489419	64.93673949	64.76668575	64.76668575	57.47885292	38.44622888	14.14530416	28.11126306
15:45:55.088	0.541093299	0.541093299	5.619111897	9.751339421	22.70689972	22.70689972	29.43652583	36.66877258	54.89823498	62.55042472	69.43380519	64.94502019	64.77491984	64.77491984	57.48562412	38.45039674	14.14761717	28.11429464
15:45:56.073	0.541311441	0.541311441	5.620394335	9.753240418	22.71034875	22.71034875	29.44080788	36.67400993	54.90593982	62.55893579	69.44290094	64.95347257	64.78332461	64.78332461	57.49253565	38.45465097	14.14997822	28.11738903
15:45:57.043	0.541526315	0.541526315	5.621657357	9.755112593	22.71374537	22.71374537	29.44502476	36.67916758	54.91352735	62.56731722	69.45185807	64.96179614	64.79160126	64.79160126	57.4993418	38.45884034	14.15230338	28.12043622
15:45:58.029	0.541744792	0.541744792	5.622941346	9.757015805	22.71719818	22.71719818	29.44931132	36.68441043	54.92124017	62.575837	69.46096299	64.97025703	64.80001442	64.80001442	57.50626019	38.46309879	14.15466699	28.12353365
15:45:58.994	0.541958672	0.541958672	5.624198104	9.758878613	22.72057757	22.72057757	29.45350664	36.68954167	54.92878876	62.58417531	69.46987392	64.97853765	64.80824828	64.80824828	57.51303112	38.46726649	14.15698032	28.12656505
15:45:59.981	0.542177483	0.542177483	5.625483634	9.760784027	22.72403414	22.72403414	29.45779767	36.69478996	54.93650949	62.59270373	69.47898795	64.987007	64.81666977	64.81666977	57.51995631	38.47152914	14.15934647	28.1296655
15:47:15.746	0.559144062	0.559144062	5.724521389	9.907454912	22.98974419	22.98974419	29.78736987	37.09785516	55.52929336	63.24734568	70.17839001	65.63693103	65.46279048	65.46279048	58.05121968	38.79854873	14.34120527	28.36746932
15:47:16.715	0.559363179	0.559363179	5.725792274	9.909335497	22.9931465	22.9931465	29.79158617	37.10301139	55.53687436	63.25571581	70.18733003	65.64523864	65.47104764	65.47104764	58.05800835	38.80272769	14.34353359	28.37050743
15:47:17.684	0.559582346	0.559582346	5.727063242	9.911216167	22.99654885	22.99654885	29.79580242	37.10816755	55.54445521	63.26408573	70.19626977	65.65354597	65.47930449	65.47930449	58.06479675	38.80690649	14.34586194	28.3735454
15:47:18.679	0.559807452	0.559807452	5.728368436	9.91314744	23.00004262	23.00004262	29.80013187	37.11346214	55.55223954	63.27268025	70.20544933	65.66207617	65.4877828	65.4877828	58.07176721	38.81119737	14.34825284	28.37666482
15:47:19.648	0.560026726	0.560026726	5.729639604	9.915028326	23.00344513	23.00344513	29.80434813	37.11861831	55.55982028	63.28104994	70.21438869	65.67038317	65.49603922	65.49603922	58.07855522	38.81537594	14.35058127	28.37970259
15:47:20.617	0.560246052	0.560246052	5.730910874	9.916909323	23.00684773	23.00684773	29.8085644	37.12377448	55.56740097	63.28941953	70.2233279	65.67869001	65.50429545	65.50429545	58.08534306	38.81955441	14.35290975	28.38274026
15:47:21.604	0.560469505	0.560469505	5.732205857	9.918825365	23.0103136	23.0103136	29.81285899	37.12902642	55.57512241	63.29794446	70.23243295	65.68715097	65.5127048	65.5127048	58.09225676	38.82381037	14.35528153	28.38583424
15:47:22.585	0.560691654	0.560691654	5.733493068	9.920729866	23.01375848	23.01375848	29.81712747	37.13424642	55.58279684	63.30641744	70.24148245	65.69556031	65.52106281	65.52106281	58.09912824	38.82804033	14.35763893	28.3889093
15:47:23.555	0.560911362	0.560911362	5.734765932	9.9226131	23.01716478	23.01716478	29.82134805	37.13940784	55.59038508	63.3147952	70.2504302	65.7038751	65.5293268	65.5293268	58.1059224	38.8322227	14.35996992	28.39194975
15:47:24.526	0.561131351	0.561131351	5.736040215	9.924498394	23.02057469	23.02057469	29.82557302	37.14457461	55.59798113	63.32318155	70.25938705	65.71219835	65.53759916	65.53759916	58.11272342	38.8364093	14.36230337	28.39499325
15:47:25.512	0.561354789	0.561354789	5.737334269	9.926412897	23.02403731	23.02403731	29.8298632	37.14982113	55.60569438	63.33169722	70.26848197	65.7206499	65.54599898	65.54599898	58.11962922	38.84066041	14.36467288	28.39808363
15:47:26.476	0.561573293	0.561573293	5.738599545	9.928284784	23.02742275	23.02742275	29.83405766	37.15495057	55.61323544	63.34002275	70.27737376	65.72891269	65.55421115	65.55421115	58.12638073	38.84481653	14.36698957	28.40110494
15:47:27.463	0.561797064	0.561797064	5.739895107	9.930201436	23.03088902	23.03088902	29.83835218	37.16020238	55.62095635	63.34854678	70.28647748	65.73737242	65.56261902	65.56261902	58.13329311	38.84907169	14.36936156	28.40419823
15:47:28.434	0.562017258	0.562017258	5.741169754	9.932087106	23.03429916	23.03429916	29.84257704	37.16536901	55.62855197	63.35693243	70.29543336	65.74569476	65.5708903	65.5708903	58.14009317	38.85325771	14.37169512	28.40724123
15:47:29.404	0.562237279	0.562237279	5.742443193	9.933970948	23.03770587	23.03770587	29.84679758	37.17053033	55.63613974	63.36530937	70.30437986	65.7540084	65.57915288	65.57915288	58.14688606	38.85743933	14.37402633	28.41028102
15:47:30.398	0.562462795	0.562462795	5.743748223	9.935901482	23.0411969	23.0411969	29.85112249	37.17581928	55.64391507	63.37389333	70.3135474	65.76252743	65.58761955	65.58761955	58.15384673	38.86172422	14.37641524	28.41339586
15:47:31.367	0.562682692	0.562682692	5.745020529	9.937783568	23.04460021	23.04460021	29.85533863	37.1809752	55.65149479	63.38226127	70.32248419	65.77083203	65.59587307	65.59587307	58.16063213	38.86590123	14.3787441	28.41643226
15:47:32.337	0.562902866	0.562902866	5.746294238	9.939667687	23.04800708	23.04800708	29.85955909	37.18613641	55.65908222	63.39063767	70.33142994	65.77914497	65.60413483	65.60413483	58.16742429	38.8700824	14.38107538	28.41947167
15:47:33.323	0.563126724	0.563126724	5.747589046	9.941582974	23.05147019	23.05147019	29.86384913	37.19138269	55.66679466	63.39915204	70.34052298	65.78759477	65.61253257	65.61253257	58.17432823	38.87433238	14.38344515	28.42256108
15:47:34.287	0.563345638	0.563345638	5.748855051	9.943455617	23.05485608	23.05485608	29.86804342	37.19651188	55.67433491	63.40747625	70.34941289	65.79585581	65.62074266	65.62074266	58.18107787	38.87848739	14.38576206	28.42558143
15:47:35.273	0.5635696	0.5635696	5.750150038	9.945371086	23.05831929	23.05831929	29.87233339	37.20175808	55.68204711	63.41599024	70.3585054	65.80430512	65.62913982	65.62913982	58.1879813	38.88273706	14.38813187	28.42867058
15:47:36.243	0.563789979	0.563789979	5.75142411	9.947255578	23.06172638	23.06172638	29.87655376	37.20691913	55.6896341	63.42436595	70.36745018	65.81261715	65.63740051	65.63740051	58.1947725	38.88691766	14.39046326	28.4317095
15:47:37.229	0.564014045	0.564014045	5.752719282	9.949171238	23.0651897	23.0651897	29.88084369	37.21216525	55.69734608	63.43287959	70.3765422	65.821066	65.64579714	65.64579714	58.20167544	38.89116704	14.39283312	28.43479839
15:47:38.192	0.564232936	0.564232936	5.753984336	9.951042311	23.0685723	23.0685723	29.88503354	37.21728898	55.70487809	63.4411945	70.38542192	65.82931758	65.65399767	65.65399767	58.20841715	38.89531716	14.39514774	28.43781513
15:47:39.178	0.564457105	0.564457105	5.755279683	9.952958146	23.07203571	23.07203571	29.8893234	37.22253499	55.71258979	63.44970773	70.39451339	65.83776592	65.66239369	65.66239369	58.21531956	38.89956622	14.39751764	28.44090376
15:47:40.147	0.564677461	0.564677461	5.756552792	9.954841049	23.07543948	23.07543948	29.89353928	37.22769054	55.72016846	63.45807404	70.40344789	65.8460684	65.67064473	65.67064473	58.22210275	38.90374189	14.39984671	28.44393902
15:47:41.133	0.564901733	0.564901733	5.757848319	9.956757067	23.07890298	23.07890298	29.89782907	37.23293646	55.72787992	63.46658689	70.41253883	65.85451625	65.67904018	65.67904018	58.22900465	38.90799064	14.40221665	28.44702739
15:47:42.118	0.565125831	0.565125831	5.759142631	9.958671244	23.08236305	23.08236305	29.9021145	37.23817704	55.73558348	63.47509097	70.42162033	65.86295533	65.68742689	65.68742689	58.23589933	38.91223495	14.40458422	28.45011251
15:47:43.082	0.565345201	0.565345201	5.760409425	9.960544684	23.08574937	23.08574937	29.90630851	37.24330581	55.74312263	63.48341349	70.4305079	65.87121418	65.69563445	65.69563445	58.24264672	38.91638859	14.40690132	28.45313171
15:47:44.068	0.565569627	0.565569627	5.761705214	9.962460962	23.089213	23.089213	29.91059818	37.24855156	55.75083367	63.49192572	70.43959798	65.87966124	65.70402899	65.70402899	58.24954781	38.92063684	14.40927131	28.45621966
15:47:45.039	0.565790691	0.565790691	5.762981378	9.964348176	23.09262398	23.09262398	29.91482256	37.25371746	55.75842728	63.50030826	70.44854952	65.88797954	65.71229555	65.71229555	58.25634366	38.92482032	14.41160526	28.45926051
15:47:46.023	0.566014766	0.566014766	5.764274719	9.966260749	23.09608069	23.09608069	29.91910347	37.25895247	55.76612244	63.50880284	70.45762065	65.89640898	65.7206725	65.7206725	58.26323024	38.92905965	14.41397049	28.46234195
15:47:46.990	0.56623502	0.56623502	5.765545804	9.968140368	23.09947772	23.09947772	29.92331039	37.264097	55.77368453	63.51715048	70.4665348	65.90469254	65.72890446	65.72890446	58.26999761	38.93322559	14.41629487	28.46537002
15:47:47.961	0.566456235	0.566456235	5.766822223	9.970027834	23.10288882	23.10288882	29.92753464	37.26926273	55.78127772	63.5255324	70.47548549	65.91301006	65.73717011	65.73717011	58.27679266	38.93740858	14.41862886	28.46841046
15:47:48.947	0.566680917	0.566680917	5.768118442	9.971944536	23.10635265	23.10635265	29.9318241	37.27450817	55.78898804	63.53404355	70.48457414	65.92145577	65.74556312	65.74556312	58.28369238	38.941656	14.42099892	28.47149773
15:47:49.929	0.56690474	0.56690474	5.769409494	9.973853555	23.10980247	23.10980247	29.93609613	37.27973229	55.79666696	63.54252	70.49362566	65.92986698	65.7539218	65.7539218	58.29056386	38.94588604	14.42335938	28.47457234
15:47:50.898	0.567125648	0.567125648	5.770683527	9.975737367	23.11320663	23.11320663	29.94031152	37.28488715	55.80424401	63.55088394	70.50255698	65.93816649	65.76216945	65.76216945	58.29734404	38.95005988	14.42568859	28.47760608
15:47:51.868	0.567346836	0.567346836	5.771958973	9.977623226	23.11661437	23.11661437	29.94453126	37.29004732	55.81182883	63.55925639	70.51149734	65.9464744	65.7704254	65.7704254	58.30413103	38.95423791	14.42802024	28.48064285
15:47:52.855	0.56757195	0.56757195	5.773256841	9.979542195	23.12008184	23.12008184	29.94882486	37.29529779	55.81954633	63.56777526	70.52059397	65.95492753	65.77882562	65.77882562	58.31103659	38.95848894	14.43039273	28.48373267
15:47:53.835	0.567795518	0.567795518	5.774545594	9.981447644	23.12352475	23.12352475	29.95308797	37.30051099	55.82720896	63.57623351	70.52962582	65.96332046	65.78716598	65.78716598	58.31789293	38.96270966	14.43274841	28.48680044
15:47:54.805	0.568016856	0.568016856	5.775821282	9.983333734	23.12693258	23.12693258	29.95730755	37.30567093	55.83479328	63.58460525	70.53856524	65.97162749	65.79542094	65.79542094	58.32467904	38.96688716	14.43508007	28.48983677
15:47:55.776	0.56823847	0.56823847	5.777098356	9.985221832	23.13034392	23.13034392	29.96153139	37.31083607	55.84238519	63.59298532	70.54751349	65.97994273	65.80368403	65.80368403	58.3314718	38.97106875	14.43741412	28.49287607
15:47:56.762	0.568463557	0.568463557	5.778395239	9.987139173	23.13380798	23.13380798	29.96582042	37.31608093	55.85009421	63.6014946	70.55659966	65.98838612	65.81207442	65.81207442	58.3383692	38.97531475	14.43978423	28.49596217
15:47:57.742	0.568687326	0.568687326	5.779684316	9.989044931	23.13725099	23.13725099	29.97008331	37.32129381	55.85775617	63.60995188	70.56563024	65.99677786	65.82041345	65.82041345	58.34522436	38.97953475	14.44213993	28.49902934
15:47:58.712	0.568908862	0.568908862	5.780960323	9.990931324	23.14065892	23.14065892	29.97430265	37.32645343	55.86533981	63.61832266	70.57456839	66.00508371	65.82866708	65.82866708	58.35200929	38.98371153	14.4444716	28.50206509
15:47:59.684	0.569130903	0.569130903	5.782239031	9.992821667	23.14407386	23.14407386	29.97853061	37.33162358	55.87293885	63.62671038	70.58352458	66.01340632	65.83693734	65.83693734	58.35880787	38.9878967	14.44680806	28.50510692
15:49:15.131	0.586518931	0.586518931	5.881747823	10.13979337	23.40924366	23.40924366	30.30657797	37.73274599	56.46234955	64.2771213	71.27784146	66.65859574	66.47797006	66.47797006	58.88569581	39.31224264	14.6281802	28.740802
15:49:16.116	0.586747982	0.586747982	5.883050503	10.14171558	23.4127074	23.4127074	30.31085991	37.73798134	56.47004042	64.28560578	71.28689645	66.66700983	66.48632886	66.48632886	58.89256514	39.31647119	14.63054852	28.74387431
15:49:17.100	0.586976853	0.586976853	5.884351949	10.14363591	23.41616766	23.41616766	30.31513747	37.74321133	56.47772337	64.29408146	71.29594198	66.67541513	66.49467891	66.49467891	58.89942725	39.32069528	14.63291443	28.74694336
15:49:18.067	0.587201821	0.587201821	5.885631001	10.14552316	23.41956819	23.41956819	30.31934112	37.74835093	56.48527349	64.30241054	71.30483101	66.683675	66.50288446	66.50288446	58.90617058	39.32484625	14.63523947	28.74995928
15:49:19.037	0.58742754	0.58742754	5.886914118	10.14741636	23.42297934	23.42297934	30.32355782	37.75350646	56.49284698	64.31076534	71.31374743	66.69196032	66.51111526	66.51111526	58.91293463	39.32900998	14.63757175	28.75298446
15:49:20.024	0.587657267	0.587657267	5.888219809	10.14934281	23.4264503	23.4264503	30.32784838	37.75875231	56.50055308	64.31926637	71.32281985	66.70039058	66.51949004	66.51949004	58.91981698	39.33324651	14.6399449	28.75606252
15:49:20.989	0.587881924	0.587881924	5.88949649	10.15122642	23.42984395	23.42984395	30.33204331	37.7638812	56.50808733	64.32757777	71.33168985	66.70863274	66.52767793	66.52767793	58.9265457	39.33738848	14.64226517	28.75907187
15:49:21.974	0.58811129	0.58811129	5.890799715	10.15314914	23.43330796	23.43330796	30.33632513	37.76911634	56.51577761	64.33606122	71.34074339	66.71704546	66.53603523	66.53603523	58.93341362	39.34161612	14.64463352	28.76214346
15:49:22.944	0.588337216	0.588337216	5.892083196	10.15504268	23.4367193	23.4367193	30.34054178	37.77427177	56.52335074	64.34441538	71.34965891	66.72532991	66.54426509	66.54426509	58.94017678	39.34577927	14.64696583	28.76516818
15:49:23.929	0.588566686	0.588566686	5.893386605	10.15696558	23.44018341	23.44018341	30.34482357	37.77950684	56.53104083	64.35289849	71.35871199	66.73374218	66.5526219	66.5526219	58.94704423	39.35000661	14.6493342	28.76823952
15:49:24.915	0.588796445	0.588796445	5.894691443	10.15889053	23.44365112	23.44365112	30.34910974	37.78474724	56.5387387	64.36139013	71.36777411	66.74216284	66.56098703	66.56098703	58.95391849	39.35423813	14.651705	28.7713139
15:49:25.880	0.58902136	0.58902136	5.895968567	10.16077455	23.44704499	23.44704499	30.35330456	37.78987596	56.54627245	64.36970067	71.37664291	66.75040386	66.56917368	66.56917368	58.96064605	39.35837935	14.65402529	28.77432265
15:49:26.867	0.589251457	0.589251457	5.897274915	10.16270164	23.45051631	23.45051631	30.35759506	37.79512163	56.55397796	64.3782006	71.38571378	66.75883263	66.57754683	66.57754683	58.96752684	39.36261488	14.65639851	28.77739992
15:49:27.838	0.589477875	0.589477875	5.898560166	10.16459755	23.45393139	23.45393139	30.36181595	37.80028219	56.5615584	64.38656251	71.39463729	66.76712447	66.58578393	66.58578393	58.97429579	39.36678157	14.65873325	28.78042716
15:49:28.822	0.589707378	0.589707378	5.899862724	10.16651895	23.45739225	23.45739225	30.36609336	37.80551184	56.56924028	64.39503626	71.4036801	66.77552716	66.59413112	66.59413112	58.98115518	39.37100392	14.66109926	28.78349483
15:49:29.793	0.589933899	0.589933899	5.901148154	10.16841503	23.46080741	23.46080741	30.37031422	37.81067233	56.57682053	64.40339783	71.41260314	66.78381855	66.60236773	66.60236773	58.98792368	39.37517031	14.66343401	28.78652184
15:49:30.763	0.59016024	0.59016024	5.902432364	10.17030926	23.46421914	23.46421914	30.37453076	37.81582753	56.58439296	64.41175072	71.42151686	66.79210127	66.61059571	66.61059571	58.99468505	39.3793323	14.66576638	28.78954564
15:49:31.733	0.590386628	0.590386628	5.903716636	10.17220354	23.46763084	23.46763084	30.37874719	37.82098259	56.59196513	64.42010327	71.43043016	66.8003836	66.61882327	66.61882327	59.00144604	39.38349407	14.66809871	28.79256927
15:49:32.715	0.590615874	0.590615874	5.905016916	10.17412138	23.47108487	23.47108487	30.38301586	37.82620151	56.59963106	64.42855916	71.43945369	66.80876834	66.62715256	66.62715256	59.0082906	39.38770726	14.67045995	28.79563025
15:49:33.686	0.590842604	0.590842604	5.906302718	10.17601782	23.47450025	23.47450025	30.3872367	37.83136192	56.60721101	64.43692015	71.44837589	66.81705893	66.6353883	66.6353883	59.01505825	39.3918731	14.67279474	28.79865682
15:49:34.671	0.591072654	0.591072654	5.907607141	10.17794168	23.47796489	23.47796489	30.39151834	37.83659667	56.6149001	64.44540147	71.45742645	66.82546876	66.64374247	66.64374247	59.02192319	39.39609883	14.67516318	28.80172689
15:49:35.640	0.591299016	0.591299016	5.908890458	10.17983435	23.48137327	23.48137327	30.39573039	37.84174632	56.62246414	64.4537448	71.46632969	66.83374172	66.65196065	66.65196065	59.02867635	39.40025574	14.67749313	28.80474695
[truncated: 5,204 more rows]
