# Supplementary material for: Measurements of spectral irradiance during the solar eclipse of 21 August 2017: reassessment of the effect of solar limb darkening and of changes in total ozone
Source: Copernicus journal article supplement (doi:10.5194/acp-2018-1048), 2018-11-02
Supplement: Supplementary file 1 [file acp-2018-1048-supplement.zip › Fig11b_Connecting_lines.csv]

Time (UT)	306 (1)	306 (2)	315	320	340 (1)	340 (2)	380	395	412	443	490	532	555 (1)	555 (2)	665	875	940	1020
14:35:14.496	0.88976124	0.886809207	0.833761641	0.854122013	0.860242443	0.862191386	0.882438587	0.8744894	0.87405053	0.871435001	0.903334119	0.925058854	0.927853518	0.930131636	0.95553297	0.963970259	0.948769076	1.004109232
19:33:39.168	0.964916742	0.965175085	0.942941075	0.940377309	0.966498917	0.967770108	0.987072601	0.972320682	0.975430733	0.974237988	1.003311527	1.021394248	1.020297678	1.023421897	1.026879783	1.005534185	1.15031127	1.029764894
