# Supplementary material for: Measurements of spectral irradiance during the solar eclipse of 21 August 2017: reassessment of the effect of solar limb darkening and of changes in total ozone
Source: Copernicus journal article supplement (doi:10.5194/acp-2018-1048), 2018-11-02
Supplement: Supplementary file 1 [file acp-2018-1048-supplement.zip › Fig11b_Measurement_to_Model.csv]

Time (UT)	306 (1)	306 (2)	315	320	340 (1)	340 (2)	380	395	412	443	490	532	555 (1)	555 (2)	665	875	940	1020
14:35:14.582	0.967811304	1.016522127	0.764500083	0.785452693	0.782396148	0.783652157	0.821932407	0.815410745	0.81868232	0.81702777	0.839025389	0.853010372	0.856236263	0.857138007	0.874421963	0.885632126	0.852313011	0.925208575
14:35:15.619	0.923123635	0.965456257	0.76449663	0.785182942	0.782454953	0.783950775	0.822205775	0.815547921	0.81869495	0.817110883	0.839389421	0.852948022	0.85665246	0.857266795	0.874635399	0.886185958	0.85273297	0.925621769
14:35:16.570	0.924927478	0.963407421	0.764570264	0.78536752	0.782564503	0.784043221	0.822318839	0.815677398	0.818827745	0.8172599	0.839658185	0.853271475	0.856991933	0.857577591	0.875084936	0.886757649	0.853470746	0.926365539
14:35:17.520	0.922311304	0.969610476	0.764728129	0.785231922	0.782547586	0.783973105	0.822316485	0.815649099	0.818764917	0.817212633	0.839581242	0.853240274	0.856876987	0.857468984	0.874948167	0.886579787	0.853377391	0.926347784
14:35:18.470	0.91848128	0.968340338	0.764685691	0.78518292	0.782522856	0.78399587	0.822327165	0.815687617	0.818806401	0.817279895	0.839737249	0.853406955	0.85710819	0.857702187	0.875276457	0.887249386	0.853992643	0.927108167
14:35:19.507	0.91618672	0.974497381	0.76465867	0.785228051	0.7824913	0.783953833	0.822331117	0.815600007	0.818719091	0.817174813	0.839589118	0.853250511	0.856978701	0.857526182	0.875047706	0.886957384	0.853792739	0.926988202
14:35:20.458	0.912134974	0.975760369	0.764553807	0.785268931	0.782483308	0.784074626	0.822383403	0.81562815	0.818780408	0.817239184	0.839780022	0.853424089	0.857184404	0.857808832	0.875479207	0.887718526	0.854508733	0.928013905
14:35:21.408	0.91744874	0.987701387	0.764969691	0.78520801	0.782446422	0.784016822	0.82241283	0.815640552	0.818763145	0.81721354	0.839732313	0.85342483	0.857169726	0.857789627	0.875530881	0.887882878	0.85470929	0.928307223
14:35:22.445	0.922681402	0.98949951	0.764675496	0.785194781	0.782532997	0.783896608	0.822380505	0.815606632	0.818772953	0.817256871	0.83981224	0.853552324	0.857296739	0.857948637	0.875825126	0.888426577	0.855257678	0.928988955
14:35:23.395	0.920867443	0.965784296	0.764708831	0.785169381	0.782479437	0.783925023	0.822421486	0.815693857	0.818846818	0.817357446	0.840021664	0.853907941	0.857593916	0.858316292	0.876410637	0.889250382	0.856183485	0.930215652
14:35:24.346	0.914189798	0.985839145	0.764636234	0.785144398	0.782422813	0.783891758	0.822363665	0.815653907	0.818762649	0.817270432	0.839895962	0.853752746	0.85758731	0.858146482	0.876280677	0.889120191	0.856041347	0.930116266
14:35:25.382	0.920034819	0.973970045	0.764793948	0.785181264	0.782511823	0.783938218	0.822394058	0.815618154	0.818738803	0.817230041	0.839853673	0.853691419	0.857420339	0.858133302	0.876259652	0.889247764	0.856202821	0.930400133
14:35:26.333	0.9195755	0.976026603	0.764754732	0.785216596	0.782443374	0.783899318	0.82238978	0.815621683	0.818753064	0.817270431	0.839983218	0.853931404	0.85776904	0.85832639	0.876613786	0.889831598	0.856870642	0.931288858
14:35:27.283	0.918054657	0.985296885	0.764691493	0.785183322	0.782475882	0.783915021	0.822417707	0.815595889	0.818742056	0.81727355	0.839945469	0.853880129	0.857817988	0.858364193	0.876766752	0.890149289	0.857210741	0.931792479
14:35:28.234	0.9229817	0.970127691	0.764592383	0.785020504	0.782511706	0.784003704	0.822449685	0.815640768	0.818753621	0.817313504	0.840106388	0.854032957	0.857909363	0.858541964	0.87708417	0.890521784	0.857756072	0.932538026
14:35:29.270	0.919879905	0.998036033	0.76452209	0.785140364	0.78245072	0.783992801	0.822394695	0.815596917	0.818726337	0.817297095	0.840012884	0.85406606	0.85815187	0.858619017	0.877252208	0.890895335	0.858139033	0.933026218
14:35:30.221	0.924220885	0.987987119	0.764528525	0.785053953	0.782504669	0.783848364	0.822420069	0.815562527	0.818707759	0.817282688	0.840074339	0.854177508	0.858199664	0.858659055	0.877440784	0.89114973	0.858513133	0.933530495
14:35:31.171	0.923045312	0.97031893	0.764700201	0.785018448	0.782427112	0.78392337	0.822385425	0.815565187	0.818712387	0.817292411	0.840185196	0.854195796	0.858314646	0.85872117	0.877646672	0.89149621	0.858971303	0.934095221
14:35:32.208	0.922387278	0.984070628	0.764593621	0.785062591	0.782432354	0.783888406	0.822389171	0.815567486	0.818658735	0.81725404	0.840099047	0.854234319	0.858357903	0.858708646	0.87768473	0.891726031	0.859257078	0.934483758
14:35:33.158	0.923887074	0.97508364	0.764470251	0.785000205	0.782406889	0.783917589	0.822329212	0.815526122	0.818630478	0.817212159	0.840069897	0.854189109	0.858350697	0.858718307	0.87775015	0.891994499	0.859517129	0.934913816
14:35:34.109	0.919216764	0.967378976	0.76475509	0.785025072	0.782372593	0.783794543	0.822355003	0.815514848	0.818574031	0.817152703	0.839986928	0.854116768	0.85819547	0.858692683	0.877674361	0.891988361	0.85960799	0.935022245
14:35:35.146	0.926453406	0.983819779	0.764429845	0.784957802	0.782356221	0.783781912	0.822284092	0.815436284	0.818512853	0.817061937	0.839984078	0.853977694	0.858121013	0.858567566	0.877584469	0.891872643	0.85959888	0.935165853
14:35:36.096	0.916546048	0.964661691	0.764499164	0.784984876	0.782356459	0.783824794	0.82230059	0.815408478	0.818473122	0.817010998	0.839894415	0.853965803	0.858074007	0.858532501	0.877565005	0.892024464	0.859800044	0.935437979
14:35:37.046	0.916172155	0.99379877	0.764731559	0.784910461	0.782381008	0.783837934	0.822274115	0.815433421	0.818483794	0.817034756	0.840017178	0.853996619	0.858204428	0.858708624	0.877858979	0.892657118	0.860400455	0.936277893
14:35:38.083	0.92295761	0.980975483	0.764667561	0.784858528	0.782352085	0.783751695	0.822281214	0.815385297	0.818432579	0.817015155	0.840016176	0.854069048	0.858308547	0.858723552	0.877965854	0.892973102	0.860734694	0.936833341
14:35:39.034	0.918708016	0.972522294	0.764494346	0.784843811	0.782331634	0.783792279	0.822224423	0.815351665	0.818426155	0.817010908	0.839947104	0.854007739	0.858202159	0.858808778	0.878236858	0.893443537	0.861240861	0.937616103
14:35:39.984	0.919269474	0.976763991	0.764654136	0.784790142	0.782315649	0.783641054	0.822226249	0.815286298	0.818300432	0.816877575	0.839743896	0.853831808	0.858048293	0.85860581	0.877974122	0.893246771	0.861113668	0.937492271
14:35:40.934	0.922161051	0.980203488	0.764408463	0.784804862	0.782311631	0.783717755	0.822171227	0.815291505	0.818299021	0.816859957	0.839716063	0.853903703	0.858086808	0.858659385	0.878138095	0.893547574	0.861474574	0.937977491
14:35:41.971	0.920467561	0.978853376	0.764277229	0.784785918	0.782268627	0.783690758	0.822208446	0.81522434	0.818250451	0.816789073	0.839638697	0.853768625	0.858094522	0.858558689	0.878118099	0.893705956	0.861687283	0.938365035
14:35:42.922	0.912346449	0.992165854	0.764361602	0.784876508	0.782228243	0.783602564	0.822114415	0.815148041	0.818157259	0.81667925	0.83941878	0.853540709	0.857795165	0.858381807	0.877796802	0.893466049	0.861568981	0.938168372
14:35:43.872	0.922233417	0.986591659	0.764207026	0.784841085	0.78216901	0.783570728	0.822003665	0.815136815	0.818109119	0.816624534	0.839408394	0.853625401	0.857862315	0.858420106	0.877962834	0.893856336	0.862024557	0.938879002
14:35:44.909	0.915664178	0.976568721	0.764502635	0.78476008	0.782220775	0.783624702	0.822044801	0.815075191	0.818059947	0.816592539	0.839385905	0.853547387	0.857822493	0.858402176	0.878061743	0.894187393	0.862405615	0.939448166
14:35:45.859	0.918666696	0.986840316	0.764365027	0.784729789	0.782242334	0.78364554	0.822055869	0.815025141	0.818016081	0.816546578	0.839280051	0.853600377	0.857765486	0.85839939	0.878173289	0.894479739	0.862734042	0.93998631
14:35:46.810	0.922140265	0.983618784	0.764414613	0.784790119	0.782196476	0.783587045	0.822020212	0.814988803	0.817950585	0.816479998	0.839199577	0.853512924	0.85772881	0.858341114	0.878146703	0.894664159	0.862968992	0.940345622
14:35:47.846	0.920129423	0.989405533	0.764371682	0.784716278	0.78213201	0.783545085	0.822034621	0.814896037	0.817860791	0.816353203	0.839090078	0.853308559	0.857640997	0.858278662	0.878192283	0.894858396	0.863261043	0.940831128
14:35:48.797	0.919565761	0.984411817	0.764137106	0.784679297	0.782141703	0.7834077	0.821919819	0.814867178	0.817782613	0.816254103	0.838997699	0.853258914	0.857527186	0.85812772	0.878059551	0.894954498	0.863424001	0.941138374
14:35:49.747	0.915475735	0.971278874	0.76423509	0.784651687	0.782059825	0.783498115	0.821872062	0.814783459	0.817725947	0.816172388	0.838909629	0.853126616	0.85742962	0.858071032	0.878113907	0.895293989	0.863798604	0.941621815
14:35:50.698	0.917868694	0.991053219	0.764134387	0.784617297	0.782078132	0.783499387	0.821794728	0.814698639	0.81764042	0.816088273	0.838746177	0.853032378	0.857326918	0.857959325	0.878041161	0.895495564	0.864033555	0.942031339
14:35:51.734	0.920687948	0.980076502	0.764218861	0.784626116	0.782028795	0.783437544	0.821879198	0.814689142	0.817574901	0.81600816	0.838719658	0.852955857	0.857398797	0.857923062	0.878101096	0.895847463	0.86443555	0.94267348
14:35:52.685	0.9148708	0.966866172	0.764250273	0.784551104	0.78203912	0.783437456	0.821717839	0.814598893	0.81745233	0.815853983	0.838445516	0.852765311	0.85711101	0.857678379	0.877874362	0.895697785	0.864425015	0.942695203
14:35:53.635	0.917894052	0.986262976	0.764281987	0.784425672	0.781951085	0.783363701	0.821664937	0.814543717	0.817412968	0.815790799	0.838400026	0.852763913	0.857137848	0.85766479	0.87799475	0.896148983	0.864897656	0.943396723
14:35:54.672	0.917386697	0.98023945	0.764230448	0.784445675	0.781962753	0.783297672	0.8216246	0.814435733	0.817276265	0.815615913	0.838218582	0.852449986	0.85680941	0.857378429	0.877712659	0.89590318	0.864868511	0.943361156
14:35:55.622	0.914774414	0.989530326	0.764319301	0.784503139	0.781888866	0.78333138	0.821606821	0.814359471	0.81717883	0.815481357	0.838047772	0.852281983	0.856686882	0.85724122	0.877609024	0.896079813	0.865152107	0.943745663
14:35:56.573	0.921635839	0.981662825	0.764423528	0.784495856	0.781909662	0.783378082	0.821607683	0.814307549	0.817114308	0.815429977	0.837980202	0.852276646	0.856633434	0.857228574	0.877679972	0.896401751	0.865600402	0.94436273
14:35:57.523	0.918070762	0.974303511	0.764210147	0.784408538	0.781822467	0.783253785	0.821522132	0.814189241	0.817032037	0.815269795	0.83780442	0.852099458	0.85640022	0.857019379	0.877497861	0.896387235	0.865675863	0.94451299
14:35:58.560	0.918241835	0.983777707	0.764141568	0.784332061	0.781807896	0.783283339	0.821412112	0.814117629	0.816899368	0.815095886	0.837555986	0.851788641	0.856175519	0.856720553	0.877259674	0.896239027	0.865696927	0.944591405
14:35:59.510	0.917655349	0.979686356	0.764295748	0.78437262	0.781812575	0.783064309	0.821378582	0.814032398	0.816759597	0.814949284	0.837309513	0.851576438	0.855894748	0.856465745	0.876996758	0.896191805	0.865720485	0.944726779
14:36:00.547	0.918966845	0.982563676	0.764136057	0.784512273	0.781776503	0.783131465	0.821309512	0.813969024	0.816681364	0.814830358	0.837225289	0.851408762	0.855814017	0.856370598	0.876995956	0.896379042	0.866081977	0.945193168
14:37:15.715	0.905514247	1.013916554	0.763831129	0.782998012	0.780616145	0.781889312	0.819570514	0.811229986	0.813275429	0.810895992	0.833171277	0.84727101	0.852181361	0.852398727	0.87347231	0.894896791	0.869572737	0.946843006
14:37:16.752	0.924167762	0.990252939	0.763446338	0.782887028	0.78055221	0.781807943	0.819516636	0.811183317	0.813247394	0.810817964	0.83300593	0.84719453	0.851889246	0.852380695	0.873503075	0.895215561	0.869847276	0.947023372
14:37:17.702	0.921276199	0.987901883	0.763666904	0.782981736	0.780629562	0.781865718	0.819634164	0.8112686	0.81330783	0.810904738	0.833117761	0.847372225	0.852076825	0.852560442	0.873908692	0.895836323	0.870485724	0.94765003
14:37:18.653	0.919661229	0.990086358	0.763672322	0.782993121	0.780590461	0.781865636	0.819515781	0.811215303	0.813233435	0.810817431	0.83308245	0.847284755	0.852053014	0.852422972	0.873741494	0.895618294	0.870455786	0.947582067
14:37:19.690	0.921258335	0.98681888	0.763684539	0.782990409	0.78062188	0.781844492	0.819516822	0.811132066	0.813191617	0.810735868	0.8329505	0.847180758	0.851932169	0.852281042	0.873577311	0.895550315	0.870305103	0.947337102
14:37:20.640	0.920358291	0.98388872	0.763802929	0.782974308	0.780562235	0.781815739	0.819461847	0.81114067	0.813153074	0.810728395	0.832838973	0.847193011	0.851978978	0.852380765	0.873689563	0.895726705	0.870646712	0.947715259
14:37:21.590	0.930807568	1.002037769	0.763657742	0.783010094	0.780607447	0.781819681	0.819529291	0.81105884	0.813067418	0.810628014	0.832835871	0.847048897	0.851927158	0.852251617	0.873489359	0.89553836	0.870512548	0.947536979
14:37:22.627	0.930511094	0.989623111	0.763569685	0.782963146	0.780543562	0.781811541	0.819444988	0.811000993	0.812998341	0.81049837	0.832567181	0.846782874	0.851665685	0.852001999	0.873159591	0.8950818	0.870103178	0.946951144
14:37:23.578	0.923624604	0.997022736	0.763759315	0.782904313	0.780497683	0.781728638	0.81936248	0.81096067	0.812903219	0.810380766	0.832479729	0.846767073	0.85149558	0.851781362	0.872834227	0.894719983	0.869770627	0.946463914
14:37:24.528	0.922400816	0.998305522	0.76372632	0.782968674	0.780501446	0.781762821	0.819312016	0.810862343	0.812846758	0.810286135	0.832379814	0.846421597	0.851305363	0.851600811	0.872623779	0.894249161	0.869449626	0.94600952
14:37:25.565	0.918490843	0.973622409	0.763691295	0.782856023	0.780510634	0.781663465	0.81934683	0.810830257	0.812814982	0.81027871	0.832212612	0.846375827	0.851204709	0.851528305	0.872479528	0.894135435	0.869382672	0.945903343
14:37:26.515	0.921287122	0.993109187	0.763925645	0.782881512	0.780513158	0.781668778	0.819339176	0.810796143	0.812744568	0.81017156	0.832165024	0.846194341	0.851199384	0.851405065	0.872283003	0.89385738	0.869159056	0.945515804
14:37:27.466	0.921448963	1.006249007	0.763586287	0.782896993	0.780494478	0.781762979	0.819328607	0.810808866	0.812777645	0.810189483	0.832031131	0.846305426	0.851235182	0.851486421	0.872299771	0.89395504	0.869303226	0.945744087
14:37:28.502	0.926660281	0.992338831	0.763577143	0.782884053	0.780509461	0.781770027	0.819383631	0.810860942	0.812806414	0.810289685	0.832182675	0.846440327	0.851432875	0.851731325	0.872680581	0.894302279	0.869798509	0.946202793
14:37:29.453	0.922773078	0.98675337	0.76359342	0.78282018	0.78047746	0.78177588	0.819353597	0.810898525	0.812825393	0.810327927	0.832317958	0.846523958	0.851505451	0.851844446	0.872854566	0.894405581	0.869982629	0.946401087
14:37:30.403	0.926433978	1.00193987	0.76373115	0.782817029	0.780478025	0.781819105	0.819326053	0.810804911	0.812799243	0.810285632	0.832200524	0.846475948	0.851470602	0.851771808	0.872716956	0.894186662	0.869731436	0.946114539
14:37:31.354	0.928921135	0.995323191	0.76347222	0.782836121	0.780471861	0.78183397	0.819383231	0.810893332	0.812904333	0.810364722	0.832481467	0.846810468	0.851755779	0.85208508	0.873132094	0.89480778	0.870332263	0.946829134
14:37:32.390	0.926123458	1.015851607	0.76365479	0.782760682	0.78047066	0.781856767	0.819353639	0.810794698	0.812800819	0.810235806	0.832277444	0.846720086	0.851403381	0.851814457	0.872701333	0.894092836	0.869725988	0.946041132
14:37:33.341	0.921981729	0.990975865	0.763737363	0.782778483	0.78045031	0.781784484	0.81931938	0.810785374	0.81275981	0.810218486	0.832253995	0.846540307	0.851331716	0.851758892	0.872637746	0.894009234	0.869664861	0.945816275
14:37:34.291	0.921869375	0.980584339	0.763724207	0.782788035	0.780407643	0.781683008	0.819363161	0.810806847	0.812773335	0.810254487	0.83234075	0.846553123	0.85133738	0.851845554	0.872728959	0.894210734	0.869860908	0.946071288
14:37:35.328	0.91415397	0.98768022	0.763628586	0.782857224	0.780423368	0.781698476	0.819333594	0.810781334	0.812701109	0.810175379	0.832299018	0.846563209	0.851330194	0.851760001	0.872580807	0.89394027	0.869628918	0.945778615
14:37:36.278	0.925114308	0.991458041	0.763718259	0.782768036	0.78043114	0.781694173	0.819341583	0.8107756	0.812744713	0.810210826	0.832298628	0.846589133	0.851423584	0.851922827	0.872796542	0.894380731	0.870007631	0.946166973
14:37:37.229	0.926772025	0.992049421	0.763770365	0.782886319	0.780448169	0.78180497	0.819485693	0.810876763	0.812849059	0.810380792	0.832592281	0.847038034	0.851950418	0.852374244	0.873422604	0.895309357	0.870893478	0.947160858
14:37:38.266	0.919143707	1.006570506	0.763797667	0.782735817	0.780454508	0.781717575	0.819421109	0.81079821	0.812744915	0.810236378	0.832376097	0.846790998	0.851663194	0.852040521	0.872970976	0.894506427	0.870187274	0.946223394
14:37:39.216	0.922524519	1.013451681	0.764002183	0.782782577	0.780435081	0.781737464	0.819307189	0.810787583	0.812731569	0.810237799	0.83240935	0.846834354	0.851644134	0.852051939	0.872956248	0.894446635	0.870148738	0.94609238
14:37:40.166	0.928172137	1.007861348	0.763649674	0.782847983	0.780479495	0.781677173	0.819384741	0.810848828	0.812804669	0.810337457	0.832681778	0.847038431	0.851947269	0.852360773	0.87339801	0.89504725	0.870731627	0.946810596
14:37:41.117	0.926799532	1.000665293	0.76356183	0.782796165	0.780473302	0.78170205	0.819407627	0.810840723	0.812772147	0.810297349	0.832557376	0.846895993	0.851757762	0.852170232	0.873009991	0.894370544	0.870126006	0.945974242
14:37:42.154	0.930669332	1.000279093	0.763826025	0.782780489	0.780480696	0.78174083	0.819441505	0.810810496	0.812757226	0.810307131	0.832532649	0.846870804	0.851698253	0.852149663	0.872942429	0.894260813	0.870011414	0.945772506
14:37:43.104	0.92718673	1.000651734	0.763774549	0.782786831	0.780474728	0.781770584	0.819427193	0.810851527	0.81280964	0.810382922	0.83281306	0.846981423	0.85175491	0.852319648	0.873250602	0.894533516	0.870210256	0.946032633
14:37:44.054	0.928017922	0.988812058	0.763705581	0.782802497	0.780568483	0.781779453	0.819460691	0.81088587	0.81285656	0.810437419	0.83285991	0.847069449	0.851818716	0.852444289	0.873351845	0.894559226	0.870263371	0.946105273
14:37:45.091	0.93075695	0.988502532	0.763588482	0.782834943	0.780431769	0.781728438	0.81951761	0.810872896	0.812804864	0.810370366	0.832698919	0.847155277	0.851714593	0.852283621	0.87311395	0.894011332	0.869758074	0.945397244
14:37:46.042	0.919217338	1.00882787	0.76372775	0.782853802	0.78052632	0.781730695	0.819492759	0.810961839	0.812902885	0.810520358	0.833025106	0.847206381	0.851958113	0.852566004	0.873346045	0.894373268	0.87006503	0.945739123
14:37:46.992	0.929785831	1.003234802	0.763758002	0.782737258	0.780559511	0.781883007	0.819558855	0.810988721	0.812963434	0.810587509	0.833053567	0.847374743	0.852089782	0.852736411	0.873494852	0.894374008	0.870076344	0.945665643
14:37:47.942	0.933025976	0.993808756	0.763865011	0.782731154	0.780564272	0.781850404	0.819636366	0.811087002	0.813056221	0.81072387	0.83323669	0.847670773	0.852409305	0.853043041	0.873997325	0.89480812	0.870514681	0.946166899
14:37:48.979	0.929193117	0.999926953	0.763764439	0.782801938	0.780608582	0.781802526	0.819615072	0.811057783	0.813024825	0.810698044	0.833206972	0.847408217	0.852373012	0.85286658	0.873628803	0.894127013	0.869908033	0.945303366
14:37:49.930	0.923437372	0.99478088	0.76361224	0.782869372	0.780586862	0.781838975	0.819707744	0.811088092	0.813112966	0.810799587	0.833382095	0.847728816	0.852524231	0.853053933	0.873873103	0.894137627	0.869984195	0.945301883
14:37:50.880	0.92886461	0.979450477	0.763893369	0.782775677	0.780678352	0.781880825	0.819809904	0.81131461	0.813351426	0.811139403	0.833818244	0.848490057	0.853227713	0.853904375	0.875010246	0.895685025	0.871537436	0.947095862
14:37:51.917	0.93298377	1.003489293	0.764002806	0.782802456	0.780681476	0.782056185	0.81986464	0.811346495	0.81336175	0.811186598	0.833914804	0.848539497	0.853338796	0.85396062	0.874998789	0.895416665	0.871350079	0.946792936
14:37:52.867	0.928706803	0.998931718	0.763905991	0.78279927	0.780757676	0.782076683	0.820046057	0.811518264	0.813584632	0.81150662	0.834292821	0.849177668	0.853978049	0.854644583	0.875906914	0.896729718	0.872569827	0.948142559
14:37:53.818	0.933479626	0.988391798	0.764015089	0.782822284	0.780713599	0.782009967	0.819992708	0.811551313	0.813609192	0.811517847	0.834235554	0.849097253	0.854043627	0.854630727	0.875828724	0.896472828	0.87230911	0.947733362
14:37:54.854	0.926311597	1.003543695	0.763984145	0.782902006	0.780830583	0.782084287	0.820112317	0.811592562	0.813675778	0.811600732	0.834384462	0.849220821	0.854209259	0.85478922	0.875881864	0.896236607	0.872168812	0.947419024
14:37:55.805	0.928278683	1.00707979	0.763888431	0.783000141	0.780820584	0.782088308	0.8200755	0.811627416	0.813693876	0.811662334	0.834462144	0.849349111	0.854384521	0.854871024	0.875933016	0.896300408	0.872173328	0.947330886
14:37:56.755	0.929679867	0.995987124	0.764029368	0.782874819	0.780863892	0.782136821	0.820187458	0.811770789	0.813861861	0.811908097	0.834880691	0.849828644	0.855006044	0.855382959	0.876641319	0.89711358	0.87297773	0.948248098
14:37:57.792	0.93096094	0.984349868	0.764088671	0.78300775	0.78085476	0.782086729	0.820295137	0.811825398	0.813980307	0.812021016	0.835204828	0.850071148	0.855267595	0.855671066	0.877016374	0.897549583	0.873436176	0.948659785
14:37:58.742	0.929577414	0.993591992	0.76408172	0.782972264	0.780930845	0.782082746	0.820355064	0.811970451	0.814117464	0.81227287	0.835587872	0.850582957	0.855682503	0.856217912	0.877771743	0.898363165	0.874322322	0.94964212
14:37:59.693	0.928274415	1.013151544	0.764007428	0.782978469	0.780934522	0.782144921	0.82044742	0.812019638	0.81420378	0.812364161	0.835735008	0.850728161	0.85579807	0.856427327	0.877915686	0.898396571	0.874428884	0.949587367
14:39:15.466	0.912424974	0.964227467	0.764521148	0.783309152	0.781849623	0.782979395	0.82284074	0.814046063	0.816386949	0.815601145	0.841118235	0.856976069	0.86275247	0.863658814	0.885261233	0.902984348	0.879652476	0.952866094
14:39:16.502	0.933123787	1.001781227	0.764865587	0.783185255	0.781898228	0.783162724	0.822745169	0.814177837	0.816516385	0.815701436	0.841063751	0.857371821	0.863082588	0.863823537	0.885644041	0.903288382	0.879697302	0.952958896
14:39:17.453	0.932676933	0.996292672	0.765179292	0.783359954	0.782050233	0.783314625	0.822944687	0.814384303	0.816751566	0.815960659	0.841423728	0.857710561	0.863382025	0.864185861	0.885910859	0.903343698	0.879808184	0.952925291
14:39:18.403	0.930669437	1.007678159	0.765000289	0.783255352	0.782069283	0.783399723	0.823016665	0.814487979	0.816884514	0.816158781	0.841624671	0.85799858	0.863822575	0.864526074	0.886380743	0.90361804	0.880153138	0.95334596
14:39:19.440	0.936006791	1.002651496	0.765188651	0.783335104	0.782140881	0.783303811	0.823099427	0.814578675	0.816986295	0.816259847	0.841820816	0.858140422	0.86403584	0.864673464	0.886469327	0.903510053	0.880004831	0.953170201
14:39:20.390	0.933748091	1.014856652	0.765081613	0.78335091	0.782117126	0.783365938	0.8231163	0.814615847	0.817032406	0.816353213	0.841936107	0.858249395	0.864248616	0.864832742	0.886601442	0.903511146	0.879978151	0.953108575
14:39:21.341	0.927902354	0.995285144	0.765219163	0.783432324	0.782183937	0.783355394	0.82319931	0.81470651	0.817171378	0.816525379	0.842157198	0.858534619	0.86462339	0.865142492	0.886903251	0.903583091	0.880089493	0.953112022
14:39:22.291	0.940991574	1.013376733	0.765254353	0.783290346	0.782167066	0.783388141	0.82327424	0.814764929	0.817207333	0.816566698	0.842172909	0.858653136	0.864572524	0.865161629	0.886859218	0.903252939	0.879792036	0.95269707
14:39:23.328	0.928876754	1.017329763	0.765272368	0.783387541	0.782221122	0.783448575	0.823440613	0.814928683	0.817381666	0.816832049	0.842574742	0.859041536	0.865019421	0.865746597	0.887462444	0.904090463	0.880495715	0.953470547
14:39:24.278	0.937582773	0.990951581	0.765203651	0.783447162	0.782250104	0.783477289	0.823592999	0.815088612	0.817554423	0.81704878	0.842871621	0.859452507	0.865498839	0.866204501	0.888042497	0.904700815	0.881072901	0.954126856
14:39:25.229	0.930542199	0.989455039	0.765392082	0.78340493	0.782314578	0.783528137	0.823654488	0.815193749	0.817721334	0.817266799	0.843357132	0.859851292	0.865876042	0.866619267	0.888518669	0.90522137	0.881495832	0.954550252
14:39:26.266	0.933001358	0.992137661	0.765354129	0.783454159	0.782343735	0.783564459	0.823665216	0.815264591	0.817777274	0.817373217	0.84337092	0.860055042	0.866140345	0.866757167	0.888625224	0.905180438	0.881430115	0.954385649
14:39:27.216	0.927202672	1.012621086	0.765265882	0.783391931	0.78242043	0.783560958	0.823850557	0.815405298	0.817969577	0.817592366	0.843785061	0.860406832	0.86676317	0.867189351	0.88910659	0.905587876	0.881864717	0.954788836
14:39:28.166	0.929113823	1.010203909	0.765357285	0.783401888	0.782455789	0.783621773	0.823921046	0.815503382	0.818102531	0.81778248	0.843955265	0.860614408	0.867075324	0.867522722	0.889487301	0.905899117	0.882130822	0.954989572
14:39:29.203	0.929725248	1.003564786	0.765251135	0.783475769	0.782489882	0.783708424	0.824084911	0.815661024	0.818281001	0.818011108	0.844380605	0.860974896	0.867368847	0.867928065	0.889904725	0.906288194	0.882525816	0.955373885
14:39:30.154	0.93084733	0.992302499	0.765290488	0.783597606	0.782506335	0.783683532	0.824133545	0.815761936	0.818366554	0.81815483	0.844526701	0.861141249	0.867519234	0.868148447	0.890111938	0.906289294	0.882637178	0.955340163
14:39:31.104	0.931538921	1.001401142	0.765386738	0.783607052	0.782578562	0.783782331	0.824253689	0.815870022	0.818496371	0.818342791	0.844754464	0.861467228	0.867664415	0.868382601	0.890306753	0.906412146	0.882677262	0.955226665
14:39:32.141	0.933148318	0.99733661	0.765407933	0.783668892	0.782586023	0.783797087	0.824334975	0.815988086	0.818649747	0.818518959	0.845051361	0.861679653	0.86802855	0.868722989	0.890673091	0.906308814	0.882772104	0.955246322
14:39:33.091	0.935582596	1.003800542	0.765446329	0.783690238	0.782681383	0.783881726	0.824441924	0.816173334	0.818858246	0.8188089	0.845488308	0.862218342	0.868674413	0.869297377	0.891430706	0.906932004	0.883402771	0.955930688
14:39:34.042	0.932052459	0.998709663	0.765534732	0.783662979	0.782743381	0.784046533	0.824633029	0.816300655	0.819007966	0.819037296	0.845789128	0.862508698	0.86902608	0.869629632	0.891778169	0.907167874	0.883555796	0.956009841
14:39:34.992	0.933190474	1.005436228	0.765641977	0.783770342	0.782839157	0.783994707	0.824710423	0.816464419	0.819182232	0.819272414	0.846116898	0.862932498	0.869255856	0.870000532	0.892040751	0.907339673	0.883642686	0.956071646
14:39:36.029	0.93204218	1.011060874	0.765718191	0.783761127	0.782887177	0.784064682	0.824910583	0.816681765	0.819416102	0.81956666	0.846456996	0.863617486	0.869833221	0.870655593	0.892791538	0.908178539	0.884381472	0.956911514
14:39:36.979	0.933886471	1.006288378	0.765532918	0.783747141	0.782986416	0.784164161	0.825023605	0.816828696	0.819620299	0.819809875	0.846909008	0.864095288	0.870290567	0.871087087	0.893163872	0.908453021	0.88465087	0.957151483
14:39:37.930	0.930633393	1.014175683	0.765735831	0.783797329	0.782982807	0.78421846	0.82518863	0.817026276	0.819886571	0.820176801	0.847263785	0.86475189	0.870966585	0.871731556	0.894004636	0.909398425	0.885446043	0.957938269
14:39:38.966	0.934115781	1.017377499	0.765630006	0.783799576	0.78312066	0.784223897	0.82535003	0.817192792	0.820075108	0.820439456	0.847765212	0.865137469	0.871444331	0.872188762	0.89452797	0.909848007	0.885839157	0.958304215
14:39:39.917	0.930851384	0.997704839	0.765516274	0.783908608	0.78312604	0.784376778	0.825416831	0.817307482	0.820185268	0.82055809	0.847949759	0.865323895	0.871621175	0.872316956	0.894483783	0.909613862	0.885600463	0.957919626
14:39:40.867	0.937316804	1.000386113	0.765873955	0.783920091	0.783202977	0.784366361	0.825545384	0.817459633	0.820355689	0.820807257	0.848222611	0.865653873	0.871938577	0.872753068	0.894955006	0.909934797	0.885901071	0.95813776
14:39:41.904	0.931330248	1.001975261	0.765680187	0.783931956	0.783200346	0.784422177	0.825695878	0.817583419	0.820515951	0.821023311	0.848481861	0.866020935	0.8723052	0.873121387	0.895336237	0.910082314	0.886170305	0.958330399
14:39:42.854	0.933694108	1.004531772	0.765938008	0.783989934	0.783284225	0.78441388	0.82585404	0.81779377	0.820724616	0.821324368	0.848928347	0.866540772	0.872788444	0.873660022	0.896003848	0.910580171	0.886830932	0.959045365
14:39:43.805	0.934824643	1.012977129	0.765837435	0.783958959	0.783322794	0.784522937	0.82599051	0.81790798	0.820894274	0.821523168	0.849268272	0.866866838	0.873176971	0.874031102	0.89638899	0.91087001	0.887047606	0.959156687
14:39:44.755	0.928478276	1.00036671	0.765990824	0.78400259	0.783422313	0.784594318	0.826062267	0.818035517	0.82106446	0.821752486	0.849504788	0.867172727	0.873650497	0.8744182	0.896935349	0.91126017	0.887426751	0.959508746
14:39:45.792	0.934579857	0.99469189	0.765849994	0.784005264	0.783456022	0.784662588	0.826200407	0.818169313	0.821235138	0.821981938	0.849822383	0.867544477	0.874096976	0.874823672	0.897348878	0.911612175	0.88774238	0.959774951
14:39:46.742	0.92781506	1.007145721	0.765940767	0.783992304	0.783474076	0.784668089	0.826244433	0.818290518	0.821326625	0.822115985	0.849897785	0.867590074	0.874224325	0.874947026	0.897275055	0.911243105	0.887388809	0.95928282
14:39:47.693	0.930722811	1.012165462	0.765920739	0.784056688	0.783544022	0.784731425	0.826435604	0.818445136	0.82155478	0.822372726	0.850249236	0.868177342	0.874753638	0.875431264	0.897805633	0.911730415	0.887810382	0.959694977
14:39:48.730	0.933180964	1.021640249	0.765898615	0.784166908	0.783554558	0.784801032	0.826516975	0.818572429	0.821704929	0.822608725	0.850511989	0.868482774	0.875142224	0.875819476	0.89823003	0.912006605	0.887995639	0.959774716
14:39:49.680	0.924167643	1.015309022	0.765785306	0.784103811	0.783632523	0.784812098	0.826622298	0.81870517	0.821873451	0.822802718	0.850840743	0.868734535	0.875519774	0.876149901	0.898469129	0.912181662	0.888091035	0.959758515
14:39:50.630	0.932587071	1.008719724	0.765990343	0.784099209	0.783723292	0.784931118	0.826821304	0.818929084	0.822107684	0.823154567	0.851428282	0.869279596	0.876134753	0.876810631	0.899314323	0.91303972	0.888813239	0.96056287
14:39:51.667	0.928514279	1.008250349	0.765966607	0.784187131	0.783765301	0.784965636	0.826945966	0.819130584	0.822318612	0.823449727	0.85179759	0.869774807	0.876688172	0.877283494	0.899809631	0.913477765	0.889259228	0.961061334
14:39:52.618	0.93480961	1.004161752	0.765983249	0.784170778	0.783863464	0.78505047	0.827051529	0.819263079	0.822473255	0.823631113	0.852099628	0.870128285	0.877053934	0.877669337	0.90010115	0.913578493	0.88936587	0.961129498
14:39:53.568	0.939637423	1.009364568	0.766119184	0.784186601	0.783885258	0.785162497	0.827255566	0.819475719	0.822718698	0.82396557	0.852624148	0.870666664	0.877663562	0.878279025	0.900883196	0.914245698	0.89002555	0.961914192
14:39:54.518	0.935053541	1.002838238	0.766080577	0.784201772	0.783925909	0.785100709	0.827325901	0.819525897	0.822819529	0.824116611	0.852836227	0.870800656	0.8778293	0.878506193	0.901005026	0.91411652	0.889880809	0.961650108
14:39:55.555	0.929940422	1.002994116	0.766218243	0.784310141	0.783954554	0.785091012	0.827467196	0.819681682	0.822996713	0.82434931	0.853219731	0.871232643	0.87818021	0.878956819	0.901546207	0.914642183	0.890262339	0.962015859
14:39:56.506	0.9367355	1.00591785	0.766169048	0.784288587	0.784019007	0.785193258	0.827589277	0.819781022	0.82313409	0.824499545	0.853426812	0.871506396	0.878430293	0.879207539	0.901734403	0.914608761	0.890182296	0.96192261
14:39:57.456	0.931731418	1.010277031	0.766214238	0.784316203	0.784014156	0.785262752	0.82765598	0.819874768	0.823215293	0.824621593	0.853567328	0.871729472	0.878574972	0.879349048	0.901873315	0.914543737	0.890043714	0.961710798
14:39:58.493	0.940426431	0.997908891	0.766185003	0.784371442	0.784106793	0.785304535	0.827733729	0.820038769	0.823408807	0.824883678	0.853906563	0.872234786	0.87905355	0.879841182	0.9024415	0.915065463	0.890524782	0.962138281
14:39:59.443	0.938340664	0.999760364	0.766224633	0.784395239	0.784164154	0.785388052	0.827875578	0.820185305	0.823595717	0.82512426	0.854148643	0.872633534	0.879560632	0.880296116	0.902880178	0.915521689	0.890915873	0.962541941
14:40:00.394	0.934241056	1.009955229	0.766322687	0.784350964	0.78417541	0.78532287	0.827942123	0.820260334	0.823684697	0.825240114	0.854243893	0.872810527	0.879570565	0.880358395	0.902845424	0.915158522	0.890550565	0.961972344
14:41:15.907	0.924403821	1.047960906	0.767472643	0.784957367	0.786760552	0.787895803	0.834699908	0.827896821	0.832691071	0.83722669	0.87063754	0.892137982	0.90015497	0.901434053	0.924401368	0.930148887	0.904327545	0.973651908
14:41:16.858	0.936584723	1.003865238	0.767224306	0.785105668	0.78669427	0.787901884	0.834476908	0.827908829	0.832730982	0.83738282	0.87130618	0.892097524	0.900330226	0.901461381	0.924477547	0.930178994	0.904400616	0.973787393
14:41:17.808	0.933577211	1.020987318	0.767502099	0.785322486	0.786813247	0.78795203	0.834648162	0.828046088	0.832889012	0.837579338	0.871575462	0.89230775	0.900612393	0.901724489	0.924771359	0.930494525	0.904737636	0.974105253
14:41:18.845	0.931841602	1.014740749	0.76748442	0.785175438	0.786839233	0.787907183	0.834529855	0.82802465	0.832856333	0.837491964	0.871496927	0.892220037	0.900503635	0.901603178	0.924580256	0.930192769	0.904484782	0.973737675
14:41:19.795	0.931982407	1.00384021	0.767395819	0.785135548	0.786847606	0.787983611	0.834640445	0.827982697	0.832813609	0.837452291	0.87129864	0.89196697	0.900416123	0.901465224	0.92432724	0.929657253	0.90418482	0.973197498
14:41:20.746	0.936066654	1.008739866	0.7673126	0.785190854	0.786841731	0.787951924	0.834619369	0.828039713	0.832862455	0.837548738	0.871465482	0.89217193	0.900643463	0.901615125	0.92451105	0.929960482	0.904471885	0.973472722
14:41:21.696	0.930683728	1.006368598	0.767307087	0.78527194	0.786869136	0.788053638	0.834758796	0.828227939	0.833043618	0.837780067	0.87181079	0.892661059	0.901229023	0.902096371	0.925177535	0.930674923	0.905259459	0.974371179
14:41:22.733	0.936716483	1.020307746	0.767626943	0.785233417	0.786885015	0.788042473	0.834797174	0.828247783	0.833100904	0.837813692	0.871802325	0.892804548	0.901411639	0.902196787	0.925249742	0.930704357	0.905358578	0.974407767
14:41:23.683	0.938756117	1.030987792	0.767548018	0.785246321	0.786885134	0.788005844	0.834856584	0.828283564	0.833135556	0.837868467	0.871849437	0.892829727	0.901358612	0.902223076	0.925238683	0.930530686	0.905203952	0.97413779
14:41:24.634	0.935139122	1.002097135	0.767514364	0.785148556	0.786899138	0.78807714	0.834853429	0.82833194	0.83320577	0.837976077	0.872024377	0.893013275	0.901597915	0.902414708	0.925401056	0.930520916	0.905394789	0.97428028
14:41:25.670	0.930240818	1.021106318	0.767498735	0.785252388	0.786927635	0.788065945	0.834891494	0.828375482	0.833260796	0.838072947	0.872089892	0.893129428	0.901662583	0.90250123	0.925520656	0.930542572	0.905448459	0.974246854
14:41:26.621	0.932128633	1.013350681	0.767750867	0.785309884	0.786994772	0.788070884	0.834975071	0.828463905	0.833369912	0.83821775	0.872381444	0.893308447	0.901841093	0.902808966	0.925929721	0.930998171	0.905860612	0.974625118
14:41:27.571	0.932121992	1.008181567	0.767532616	0.785285183	0.786979443	0.78807666	0.835039239	0.828496367	0.833418667	0.83823952	0.872466684	0.893407063	0.901929059	0.902866008	0.925865625	0.93080006	0.905697583	0.974425349
14:41:28.608	0.93107665	1.005664304	0.767436628	0.785258011	0.786974882	0.788106768	0.835042703	0.828497429	0.833396476	0.83822278	0.872419216	0.893327847	0.901810798	0.902768347	0.925669395	0.930391901	0.90536988	0.973992345
14:41:29.558	0.935463991	0.99929267	0.767578591	0.78523093	0.787011685	0.788191851	0.835171105	0.828549345	0.833469929	0.838325623	0.872583411	0.893522284	0.902033495	0.902985764	0.925857164	0.930770251	0.905646678	0.974306185
14:41:30.509	0.93714378	1.004517131	0.767528416	0.785198212	0.787014917	0.788263765	0.835149971	0.828616204	0.833570444	0.838453043	0.872770414	0.89375177	0.902423288	0.903204602	0.926179907	0.931101318	0.906008173	0.974620032
14:41:31.459	0.936591338	1.010148735	0.76742821	0.785188353	0.7870216	0.78813949	0.835181256	0.828654219	0.833608494	0.838485677	0.87271696	0.89384071	0.902405478	0.903247148	0.926245399	0.931086618	0.906012359	0.974489003
14:41:32.496	0.940382606	1.00720888	0.767419558	0.785199066	0.787011219	0.788143183	0.835070484	0.8285366	0.833484423	0.838342619	0.87249143	0.893496829	0.902056536	0.90283708	0.925624747	0.93009291	0.905159992	0.973529041
14:41:33.446	0.933078177	0.998971227	0.767518317	0.785214901	0.787034385	0.788167584	0.835082171	0.828474347	0.833407254	0.838226077	0.872347617	0.893334877	0.901804297	0.902635039	0.925247106	0.92967258	0.904730517	0.972999922
14:41:34.397	0.934931916	1.003604901	0.767554467	0.785221105	0.787000646	0.788115479	0.835171247	0.828571409	0.833508865	0.838400601	0.872604439	0.893657207	0.90218401	0.90292905	0.925674333	0.930143148	0.905173408	0.973410681
14:41:35.434	0.940143828	1.009483645	0.767490311	0.785252222	0.787059734	0.788188417	0.83515313	0.828553611	0.833504873	0.838385096	0.872586726	0.893695448	0.902216292	0.902972292	0.925659812	0.930093765	0.905144106	0.973352697
14:41:36.384	0.94307077	1.003082612	0.767509985	0.785178672	0.786996974	0.788176951	0.835115382	0.828520537	0.833469804	0.838320233	0.872492316	0.893505797	0.902102331	0.902847994	0.925503284	0.92982162	0.904924504	0.973084287
14:41:37.334	0.941083729	1.023420622	0.767525884	0.785176681	0.787098446	0.788156544	0.835186839	0.828667438	0.833642885	0.83856573	0.872859155	0.894087257	0.902643208	0.903330986	0.926240651	0.930810404	0.905820617	0.974111049
14:41:38.371	0.939114332	1.004688443	0.767501239	0.785204123	0.787106208	0.788236579	0.835343968	0.828729973	0.833731874	0.838669362	0.87300624	0.894450069	0.902782239	0.903604867	0.92659275	0.931288054	0.906248491	0.974631662
14:41:39.322	0.931825041	0.989821593	0.767544233	0.785188834	0.787045585	0.788247829	0.835338328	0.828749792	0.833721084	0.838614195	0.872832937	0.894227761	0.902585803	0.903441378	0.92633796	0.930871024	0.905885291	0.974136516
14:41:40.272	0.935507668	1.002325073	0.767605404	0.785170121	0.787101206	0.788243928	0.835262117	0.828755405	0.833713251	0.838613944	0.872823972	0.894151761	0.902608634	0.903496376	0.926345002	0.930906343	0.905924725	0.974164934
14:41:41.309	0.932463842	1.0091405	0.767619645	0.785129586	0.787145412	0.788266777	0.835400512	0.828809616	0.833803151	0.838763951	0.873193297	0.894357862	0.90281436	0.903779649	0.926672552	0.931494246	0.906390466	0.974770388
14:41:42.259	0.934909951	0.995303662	0.767520597	0.78517778	0.787146217	0.788290295	0.83534628	0.82878588	0.83375065	0.838675924	0.873052035	0.894232919	0.902635177	0.903600802	0.926398298	0.931021258	0.905948695	0.97420095
14:41:43.210	0.935555594	1.007837926	0.767501494	0.785253295	0.787093812	0.788187051	0.835408652	0.828839298	0.833817975	0.83876655	0.873132277	0.894302707	0.902792611	0.903752367	0.926556994	0.931304605	0.906183393	0.974478261
14:41:44.160	0.936019759	1.002784274	0.767636545	0.785189774	0.787129698	0.788267398	0.835442958	0.828928398	0.833915479	0.838893672	0.873308856	0.894647888	0.90309818	0.904012057	0.926802953	0.931668753	0.906549686	0.974875312
14:41:45.197	0.935823889	1.009454748	0.767506134	0.785212822	0.787129571	0.788263957	0.835361	0.828800964	0.833762917	0.838701534	0.87300804	0.894139173	0.902558842	0.903498272	0.926065824	0.930440328	0.905384747	0.973458919
14:41:46.147	0.931642361	0.9971675	0.767592066	0.785148501	0.787191553	0.788256282	0.835469476	0.828851124	0.83381491	0.83875841	0.873036979	0.894260019	0.902734592	0.903623814	0.92620472	0.93055021	0.905514297	0.97359966
14:41:47.098	0.931096006	1.00151448	0.76736926	0.785208708	0.787256929	0.788306447	0.835658838	0.829105974	0.83411426	0.839165992	0.873643008	0.895099671	0.903618774	0.904509617	0.927412662	0.931975172	0.907014617	0.975234716
14:41:48.134	0.929657056	1.014774353	0.767513513	0.785113975	0.787131556	0.788288563	0.835567517	0.829072101	0.834037021	0.839061369	0.873408351	0.894808665	0.903226098	0.904252563	0.926998456	0.931433918	0.906482331	0.974572853
14:41:49.085	0.928456173	1.016557852	0.76745631	0.785202373	0.787229202	0.788225209	0.835613587	0.829073145	0.834098925	0.83913103	0.873479994	0.894945236	0.903472125	0.904385385	0.927141588	0.931490513	0.906609007	0.974623884
14:41:50.035	0.931242834	1.023398681	0.767319716	0.785145818	0.787174902	0.788178992	0.835641949	0.829090974	0.83407107	0.839106317	0.873419291	0.894849411	0.903404052	0.904328671	0.927033241	0.931220875	0.906441507	0.974378526
14:41:51.072	0.928204601	1.00542243	0.767302112	0.785113649	0.787237166	0.788305684	0.83566612	0.829139505	0.834146628	0.839206741	0.873676334	0.894913323	0.903505328	0.904471349	0.927212157	0.931409368	0.906553804	0.974436732
14:41:52.022	0.931267644	1.011739096	0.767389963	0.785060753	0.787257156	0.788473781	0.835778783	0.829194462	0.834195754	0.839287974	0.873853774	0.894994676	0.903596619	0.904632618	0.927391869	0.931524255	0.906770748	0.974709137
14:41:52.973	0.929805586	1.014436721	0.767524037	0.785106089	0.787262964	0.78837288	0.835800711	0.829281446	0.834351261	0.839490046	0.874207061	0.895345455	0.903900957	0.905049607	0.927886439	0.93216123	0.907399064	0.975491058
14:41:54.010	0.929921516	1.017472705	0.767529022	0.785215141	0.78728425	0.788421452	0.835916384	0.829317022	0.834392028	0.83956056	0.874310281	0.895544178	0.90415621	0.905201098	0.928062891	0.932381413	0.907536782	0.975668357
14:41:54.960	0.930969622	1.017648312	0.76756377	0.785078959	0.787318841	0.78831991	0.835813245	0.829235448	0.834278524	0.839347913	0.874038816	0.8951471	0.903790113	0.904749956	0.927369236	0.93128763	0.906615983	0.974432272
14:41:55.910	0.932050112	0.996792445	0.76753609	0.785052787	0.78732068	0.788377526	0.835941334	0.829351992	0.83440523	0.839556306	0.874237472	0.895480064	0.904052931	0.9051228	0.927877024	0.932062641	0.907362113	0.975279095
14:41:56.861	0.929807843	1.005882361	0.767444334	0.7850929	0.787313102	0.788387631	0.835886365	0.829346133	0.834430102	0.83956221	0.874264686	0.895554469	0.904119249	0.905159551	0.927882331	0.931989118	0.907337727	0.975202615
14:41:57.898	0.940729698	1.014868148	0.767330721	0.785182164	0.787260986	0.788328221	0.835865255	0.829312908	0.83437246	0.839499315	0.874115246	0.895306515	0.903950721	0.904959642	0.927548282	0.931558472	0.906932459	0.97464137
14:41:58.848	0.936333846	1.001226545	0.767530122	0.785210293	0.787343389	0.788357293	0.836027444	0.829378501	0.834465248	0.839585718	0.874312424	0.895565673	0.904139149	0.905169032	0.927801643	0.931886879	0.907247901	0.974992384
14:41:59.798	0.938981562	1.009788858	0.767492089	0.785165356	0.78729461	0.788336567	0.83590039	0.82935473	0.834421653	0.839542601	0.874137732	0.895429159	0.90399731	0.90508146	0.927688368	0.931641369	0.907036204	0.97469611
14:43:15.658	0.909018352	0.990572325	0.767449455	0.785357411	0.78979959	0.790651999	0.842630479	0.836928396	0.84328022	0.850958587	0.889103403	0.912133741	0.922208904	0.922975177	0.945391459	0.943570524	0.919898232	0.983611173
14:43:16.694	0.93286598	1.001440798	0.768032912	0.785497596	0.789838334	0.790919867	0.84263367	0.837143702	0.843491407	0.851227101	0.889519686	0.912663879	0.922501514	0.923587116	0.945964872	0.944027042	0.920479381	0.984259246
14:43:17.645	0.933293895	1.019048598	0.768032766	0.785579095	0.789976998	0.791050051	0.842856807	0.837398109	0.843770479	0.851562297	0.889958646	0.913027977	0.922884168	0.923966924	0.946263859	0.944052936	0.920637317	0.984235905
14:43:18.595	0.936546609	0.988881521	0.768117773	0.785598043	0.790069683	0.79108982	0.84296764	0.837527472	0.843950241	0.851802876	0.890395918	0.913516038	0.923274338	0.92438308	0.946780733	0.944471103	0.921114175	0.984671011
14:43:19.632	0.934704014	0.994632839	0.767987444	0.78559716	0.790096919	0.791095232	0.843109246	0.837641656	0.844032484	0.851909983	0.89050487	0.91372143	0.923474251	0.924506018	0.946837211	0.944351986	0.92100489	0.984453438
14:43:20.582	0.933699568	1.016198559	0.768088507	0.785592927	0.7901124	0.791140342	0.843259609	0.83787359	0.84427735	0.852253431	0.89097566	0.91416575	0.923995973	0.925112504	0.947485389	0.945035785	0.921657108	0.985108891
14:43:21.533	0.927529689	0.995003143	0.768156339	0.785585556	0.790194004	0.791188497	0.843419514	0.838020324	0.84447485	0.852512373	0.891301101	0.914665848	0.92439729	0.92549301	0.947858052	0.945329018	0.921920808	0.985335497
14:43:22.483	0.938880939	1.005408008	0.768274561	0.785654963	0.790194397	0.791282885	0.843518317	0.838090255	0.844522145	0.852561693	0.891260074	0.914625339	0.924353404	0.925464654	0.947634022	0.944825074	0.921460181	0.984628472
14:43:23.520	0.928401146	0.998331819	0.768224829	0.785762411	0.790305042	0.791384895	0.843688224	0.838272084	0.844817696	0.852923633	0.89172756	0.915173706	0.924994042	0.926128465	0.948511142	0.945690806	0.922316783	0.985587011
14:43:24.470	0.932504769	0.998389364	0.768067179	0.785699781	0.790320676	0.791346763	0.843744936	0.838399932	0.844906872	0.853024203	0.891922702	0.915350369	0.925181901	0.926248202	0.948583074	0.945528437	0.922222969	0.98535551
14:43:25.421	0.934407831	1.007373332	0.768213766	0.785703642	0.79038168	0.791411178	0.843872126	0.838560803	0.845109293	0.853308698	0.892263047	0.915895397	0.925664801	0.926643884	0.949076547	0.945920216	0.922679051	0.985797426
14:43:26.458	0.92974025	0.99728261	0.768119923	0.785771534	0.790393107	0.791482799	0.843927961	0.83871613	0.845297219	0.85353849	0.892535658	0.916131195	0.925992195	0.926974146	0.949348727	0.946084798	0.922800077	0.985805882
14:43:27.408	0.928613142	1.009444101	0.768111247	0.785811202	0.790515707	0.791536568	0.844179464	0.838925922	0.845543978	0.853888555	0.892873042	0.916658764	0.926550135	0.92755265	0.949965869	0.946776632	0.923475127	0.986480383
14:43:28.358	0.931492991	1.006044613	0.768216118	0.785751267	0.790508148	0.791545126	0.844299708	0.839075295	0.845707298	0.854077591	0.893084649	0.916943073	0.92686193	0.927847848	0.950171841	0.946866986	0.923640281	0.986589805
14:43:29.395	0.929754437	0.994692469	0.768045569	0.785810697	0.790624977	0.791601962	0.844527707	0.839263264	0.845953791	0.854382802	0.893548448	0.917389829	0.927449189	0.928349992	0.950691016	0.947341159	0.924071166	0.986909741
14:43:30.346	0.940684439	0.990716692	0.76832518	0.785838701	0.790676129	0.79165377	0.844556481	0.839420775	0.846115143	0.854614735	0.893732399	0.917712127	0.927840179	0.928689934	0.951001355	0.94753155	0.92429572	0.987039039
14:43:31.296	0.932862792	1.007252406	0.768278104	0.785776541	0.790688667	0.791793887	0.844690486	0.839562444	0.846283197	0.854829436	0.894106689	0.917913116	0.928147032	0.929002228	0.951370547	0.947701524	0.924461434	0.987072033
14:43:32.246	0.937538021	1.012248782	0.768248389	0.78575086	0.790708003	0.791868558	0.844833345	0.839698478	0.846452413	0.855062515	0.89434138	0.918276077	0.928476316	0.929360957	0.95171533	0.947925327	0.924748333	0.987237845
14:43:33.283	0.934945742	0.996964369	0.768431494	0.785821766	0.790805429	0.791852681	0.844953284	0.839805311	0.846556712	0.855195165	0.894593325	0.918378748	0.928613027	0.92949506	0.951751795	0.947733169	0.92461069	0.986965264
14:43:34.234	0.92951806	1.000565753	0.768210496	0.785855333	0.790882177	0.79189692	0.845115255	0.839993407	0.846775114	0.855494043	0.894965091	0.918769597	0.929096326	0.929973474	0.952338103	0.948219191	0.925126612	0.987553249
14:43:35.184	0.931097514	0.987528319	0.768212286	0.785857565	0.79091135	0.791994745	0.845288083	0.840191381	0.847017211	0.855794453	0.895428278	0.919275177	0.929539401	0.930517508	0.952816645	0.948607459	0.925665495	0.988087458
14:43:36.221	0.930953561	1.000738301	0.768295066	0.78586546	0.790944935	0.791919771	0.845323818	0.840236015	0.847101441	0.855864731	0.895532439	0.919421185	0.929690909	0.930621151	0.952836844	0.948552282	0.925515094	0.987834704
14:43:37.171	0.93546392	1.011118094	0.768408015	0.785894841	0.790997299	0.792008532	0.845476023	0.840398358	0.847276431	0.856092263	0.895821335	0.919712862	0.930051855	0.930963946	0.953247824	0.948858518	0.925789129	0.988126751
14:43:38.122	0.934986758	1.005658456	0.768215028	0.785963397	0.791020361	0.792055391	0.845505563	0.840518098	0.847444742	0.856309917	0.896046073	0.920136272	0.930307559	0.931316703	0.953643571	0.949161751	0.926133525	0.98840289
14:43:39.158	0.926265407	1.002636937	0.768352602	0.785997601	0.791018654	0.792121529	0.845633691	0.84064506	0.847583715	0.856480731	0.896416577	0.920305382	0.930545983	0.931537732	0.953835779	0.949176415	0.926134681	0.988328714
14:43:40.109	0.930570188	1.004990717	0.768446501	0.785872413	0.791110114	0.792139524	0.845740123	0.840758991	0.847706235	0.8566458	0.896729371	0.920520427	0.93081058	0.931795067	0.954086195	0.949287996	0.926235391	0.988365744
14:43:41.059	0.928264713	0.997805141	0.768385193	0.785887202	0.791127372	0.792105786	0.845827007	0.840844798	0.847803705	0.856779113	0.896779532	0.920611602	0.930948397	0.931991024	0.954266985	0.94936998	0.926289025	0.988375973
14:43:42.096	0.925605648	1.001825457	0.768249737	0.785875203	0.791152341	0.79218286	0.845874286	0.840960221	0.84791513	0.856937653	0.896955218	0.920805082	0.931197417	0.932223232	0.954500321	0.949494126	0.926363489	0.988412858
14:43:43.046	0.932016861	1.022069422	0.768187271	0.785852732	0.791191768	0.792162202	0.846011336	0.841085217	0.848069316	0.857120794	0.897139614	0.921066907	0.931431266	0.932498062	0.954708515	0.949564164	0.926415016	0.988356343
14:43:43.997	0.929995719	1.005371114	0.768191618	0.78594246	0.791176282	0.79226951	0.846133949	0.841260743	0.84827888	0.85739229	0.897490338	0.921529911	0.931911852	0.932962615	0.955243535	0.950111693	0.926904695	0.988849465
14:43:44.947	0.93149271	1.005402109	0.768352753	0.785887879	0.791340035	0.792390064	0.846260844	0.8414125	0.84849054	0.857680551	0.897851883	0.922016779	0.932400922	0.933478219	0.955763147	0.950628463	0.927419019	0.989443202
14:43:45.984	0.924199143	0.990645776	0.768239887	0.785895016	0.791327461	0.792273153	0.846356352	0.841509478	0.848647269	0.857877378	0.898014668	0.922334458	0.932673876	0.933739406	0.956058593	0.950810601	0.927556633	0.989591814
14:43:46.934	0.928179665	1.000907392	0.76829885	0.785879599	0.791376776	0.792454166	0.846481769	0.841735277	0.848920989	0.858213645	0.898652496	0.922840283	0.933235279	0.934372651	0.956725843	0.951562875	0.928334743	0.990450475
14:43:47.885	0.932391943	1.003646406	0.768341256	0.785923451	0.791420235	0.792474869	0.846641198	0.841820346	0.849008465	0.858292394	0.898741401	0.922954526	0.933305152	0.934481371	0.956718194	0.951350233	0.928166408	0.990180352
14:43:48.922	0.926503482	0.999527275	0.76833251	0.785890765	0.791530269	0.792510824	0.8466875	0.841942528	0.849101529	0.858453022	0.898929986	0.923196126	0.933549106	0.934709196	0.956962002	0.951360108	0.928223947	0.99023268
14:43:49.872	0.932329342	0.99385259	0.768313581	0.785859089	0.791470714	0.792553101	0.846855822	0.842098562	0.849306457	0.858726611	0.899352325	0.923604151	0.934013854	0.935161077	0.957540927	0.951858824	0.928764306	0.990789073
14:43:50.822	0.928911818	1.007310795	0.768364606	0.785873997	0.791512665	0.792495852	0.84695333	0.842208361	0.849434117	0.858917526	0.899598662	0.923886006	0.934329463	0.935446775	0.957785093	0.95207401	0.928987557	0.990909449
14:43:51.859	0.93845041	0.995240777	0.768375259	0.78594249	0.79154545	0.792550927	0.847023415	0.842307984	0.849589229	0.859085523	0.899790525	0.92421374	0.934567692	0.935758294	0.958083284	0.952344171	0.929246792	0.99109541
14:43:52.810	0.924917585	0.998060858	0.76826014	0.785995948	0.791654274	0.792668971	0.84721314	0.842444438	0.849744534	0.859277921	0.900009532	0.924533828	0.934871092	0.936021858	0.958275586	0.952411322	0.929369984	0.99112019
14:43:53.760	0.931020506	1.002991475	0.768409128	0.785925482	0.791660976	0.79264076	0.847248649	0.842570736	0.849853752	0.859422679	0.900223311	0.92481909	0.935029273	0.936205511	0.958369014	0.952462086	0.92939786	0.991063469
14:43:54.710	0.935815293	1.001769295	0.768412119	0.785949735	0.791649187	0.792682221	0.847302618	0.842598154	0.84990212	0.859506065	0.900297954	0.924873321	0.935073666	0.93625663	0.958368263	0.952278472	0.92923586	0.990788038
14:43:55.747	0.925787537	1.002564077	0.768185457	0.785907862	0.791706839	0.792752654	0.84740982	0.842736411	0.850023298	0.85965633	0.90053465	0.925135941	0.935453472	0.936569983	0.958797893	0.95260966	0.929532222	0.991055568
14:43:56.698	0.940018454	0.992642521	0.768328729	0.785883617	0.791730858	0.792725344	0.847442882	0.842770474	0.850099421	0.859743296	0.900671587	0.925185196	0.935462581	0.936668059	0.958792765	0.952478543	0.929355586	0.990800559
14:43:57.648	0.935547006	1.004303958	0.768270065	0.785896162	0.79171636	0.792748468	0.847564143	0.842931479	0.850291654	0.859969362	0.900963168	0.925628117	0.935873045	0.93709111	0.959292541	0.952894931	0.929843594	0.991316321
14:43:58.685	0.932798968	1.017983797	0.768338311	0.785949949	0.791763508	0.792798637	0.847652716	0.843022992	0.850396435	0.860107691	0.901097333	0.925754968	0.936085885	0.93731512	0.959449748	0.95293616	0.929865508	0.99126457
14:43:59.635	0.931437479	1.007594546	0.76848601	0.785802686	0.791808442	0.792754742	0.847727002	0.843107433	0.850554616	0.860296566	0.901328053	0.925996342	0.936448504	0.937635397	0.959794818	0.953319862	0.930133015	0.991570562
14:45:15.322	0.948744054	0.987825181	0.767120205	0.784868279	0.792683899	0.793369978	0.851435052	0.846932935	0.854797528	0.865618721	0.907989741	0.933860007	0.945361168	0.946308403	0.967860007	0.957728151	0.934614155	0.994793599
14:45:16.358	0.92525612	0.986457482	0.767236442	0.784849038	0.792551713	0.793584698	0.851196696	0.846948337	0.854769292	0.86567879	0.908555219	0.933874369	0.9453667	0.946357892	0.967970984	0.958215458	0.934943696	0.995196631
14:45:17.309	0.924189047	0.997943062	0.76732488	0.784846081	0.792581659	0.793521306	0.851201796	0.846867489	0.854627475	0.8654585	0.908079988	0.933383854	0.944888473	0.945851678	0.967278569	0.957368002	0.93418927	0.994315947
14:45:18.259	0.920502645	0.995415574	0.767352539	0.78482354	0.792501378	0.793453316	0.851090489	0.846744343	0.854472389	0.865292922	0.907916963	0.933226595	0.944608306	0.945621434	0.967024733	0.957102068	0.93393054	0.9940494
14:45:19.210	0.928658014	0.99785854	0.767361123	0.784836204	0.792479606	0.793516499	0.851055322	0.846698773	0.854404393	0.865182078	0.907802156	0.933047318	0.944460447	0.945496525	0.96692813	0.957129519	0.933938105	0.994086822
14:45:20.246	0.922669112	1.011591554	0.767289545	0.784724676	0.792350028	0.793382274	0.850832225	0.846449647	0.854137892	0.864846356	0.907266216	0.932420249	0.943867435	0.944881081	0.966193937	0.956217285	0.933020725	0.993091018
14:45:21.197	0.925146319	1.000591094	0.76728978	0.784718006	0.792374355	0.793265473	0.850820496	0.846422603	0.854101068	0.864813513	0.907339772	0.932484096	0.943889943	0.944912918	0.966312823	0.956485365	0.933359099	0.993503322
14:45:22.147	0.934951733	1.005868437	0.767379461	0.784709783	0.792346035	0.793402817	0.850780858	0.846398387	0.854058718	0.864762665	0.907356906	0.932510468	0.943890671	0.944912482	0.966376159	0.956752225	0.93363301	0.993768395
14:45:23.184	0.92467856	0.998018451	0.767226397	0.784716089	0.792300693	0.793359184	0.850733753	0.846331135	0.854015731	0.864643763	0.907255683	0.932414153	0.943932271	0.944840433	0.96633973	0.956870454	0.933784609	0.99387699
14:45:24.134	0.924229685	1.009561037	0.767220942	0.784631889	0.792297512	0.793290381	0.850617928	0.846199895	0.853827763	0.864455057	0.90697498	0.932077823	0.9435321	0.944502674	0.96597347	0.956483436	0.933466663	0.993520452
14:45:25.085	0.924859171	0.991955298	0.767025556	0.784595225	0.79217833	0.793143541	0.85049784	0.846117044	0.853707121	0.864307734	0.906857343	0.931948522	0.943280508	0.94427934	0.965712684	0.956249905	0.933288348	0.993240508
14:45:26.122	0.926828557	0.993493204	0.767036738	0.784506504	0.792184691	0.793137009	0.850449408	0.845956839	0.853567476	0.864119588	0.906541633	0.931559482	0.942969152	0.943965552	0.965337222	0.955875241	0.933027782	0.992948949
14:45:27.072	0.930776865	0.999841605	0.766943113	0.784502312	0.792183628	0.793088059	0.850407181	0.845973829	0.853551522	0.864080207	0.90658673	0.931671566	0.943076052	0.94402092	0.965489069	0.95615896	0.933362943	0.993237959
14:45:28.022	0.93272384	0.99852924	0.766879063	0.78439905	0.79208502	0.793092107	0.850375417	0.845859597	0.853450744	0.863961009	0.906395373	0.931465857	0.942822845	0.943823726	0.965284026	0.955958594	0.933216906	0.993063701
14:45:29.059	0.929926984	0.99462565	0.767048979	0.784402354	0.792077586	0.793052802	0.850299669	0.845778968	0.853382676	0.863870023	0.906378231	0.931369725	0.942783435	0.943761873	0.965289287	0.956027429	0.933341161	0.993210788
14:45:30.010	0.927276072	0.994689093	0.766833273	0.784434214	0.792062093	0.793038007	0.850312247	0.845691998	0.853265988	0.863734311	0.906201685	0.931156808	0.942578948	0.943552069	0.965011507	0.955764559	0.933156177	0.9929298
14:45:30.960	0.928386784	1.007539649	0.767089027	0.784330756	0.792090209	0.793028212	0.850238432	0.845715486	0.853259411	0.863751523	0.906280996	0.931293779	0.942586251	0.943644185	0.965220836	0.956142257	0.933560184	0.993380783
14:45:31.910	0.928844316	0.99989568	0.766960686	0.784256921	0.792033923	0.792996263	0.850253293	0.845671786	0.853203018	0.863663391	0.906105736	0.93113303	0.942488812	0.943554751	0.96511455	0.95595851	0.933512991	0.993297764
14:45:32.947	0.926442786	0.989137833	0.766922432	0.784213745	0.791946666	0.792925949	0.850180323	0.845583923	0.853092399	0.863529972	0.905966196	0.930940221	0.942232475	0.943315882	0.964837754	0.955730421	0.933345917	0.993034947
14:45:33.898	0.9261614	1.001411064	0.766881583	0.784247396	0.791938117	0.792968864	0.850106411	0.845534643	0.85305656	0.863478842	0.905853423	0.93085007	0.942185586	0.943269908	0.964748922	0.955649704	0.93336981	0.992984055
14:45:34.848	0.925173922	1.006220376	0.766773275	0.784180191	0.791952171	0.792924459	0.850071225	0.845507408	0.852992573	0.863378713	0.905813844	0.930759023	0.942040916	0.943165566	0.964631323	0.955501365	0.933299056	0.992868904
14:45:35.885	0.923514688	1.000345134	0.766879992	0.784138532	0.791920554	0.792843162	0.850145553	0.845577734	0.853079135	0.863527351	0.90602357	0.93107638	0.94233875	0.943473302	0.965131741	0.956161983	0.934054468	0.993711456
14:45:36.835	0.924765665	0.989653458	0.766760737	0.784148257	0.791889872	0.792948343	0.850131715	0.845508136	0.853015036	0.863424732	0.905875626	0.930906143	0.942200535	0.943333526	0.964948052	0.955946907	0.933889019	0.993477977
14:45:37.786	0.929878682	1.002685361	0.766944105	0.784155771	0.791826267	0.7928259	0.850059988	0.84543768	0.85292075	0.863307317	0.905684641	0.930707073	0.942050824	0.94314167	0.964703327	0.955719619	0.933672507	0.993183052
14:45:38.822	0.925116646	0.989956353	0.766664868	0.783999381	0.791819369	0.79273382	0.849888839	0.845294468	0.852697703	0.86304553	0.905321176	0.930265308	0.941522493	0.942587777	0.964079559	0.955022606	0.932981915	0.992347922
14:45:39.773	0.921404714	0.992887076	0.766719317	0.784010504	0.791782257	0.792760072	0.849941906	0.845314359	0.852773943	0.863157538	0.905537425	0.930515093	0.941840807	0.942870008	0.964438597	0.9555317	0.933621559	0.993105526
14:45:40.723	0.924016344	0.990787676	0.766616965	0.784004683	0.791714288	0.792721276	0.84996197	0.845278605	0.852737679	0.863103922	0.90543117	0.930538949	0.94187411	0.942863947	0.964454633	0.955640904	0.933843105	0.993408393
14:45:41.674	0.925061844	1.007949412	0.766695856	0.783949766	0.79171651	0.792694564	0.849847422	0.845196369	0.852620239	0.862955141	0.905277838	0.930268092	0.941644198	0.942653806	0.96424597	0.955505996	0.933665708	0.993197777
14:45:42.710	0.927606341	1.00054612	0.76648792	0.783886607	0.791661428	0.792617653	0.84973097	0.845037022	0.85243842	0.862736731	0.904977609	0.929968912	0.941209986	0.942269155	0.963799484	0.955043618	0.933257293	0.992761412
14:45:43.661	0.923747459	0.992083773	0.766645928	0.783865885	0.79164064	0.792596418	0.84974879	0.844983547	0.852378926	0.862657265	0.904897679	0.92983533	0.941110565	0.942183031	0.96372028	0.955033356	0.93331284	0.992858332
14:45:44.611	0.929847245	1.003272331	0.766557536	0.783754156	0.791520107	0.792633404	0.84957175	0.844822596	0.852167866	0.862393543	0.904496416	0.929412862	0.940688801	0.941754365	0.963232632	0.954548895	0.932842062	0.992268869
14:45:45.648	0.92778644	1.005156483	0.76661149	0.783778605	0.791524562	0.792536444	0.849425433	0.844705999	0.8519871	0.862174508	0.904235392	0.929039802	0.940351469	0.941369636	0.962829758	0.954115798	0.932421966	0.991821033
14:45:46.598	0.927463609	0.997634399	0.766559306	0.783684768	0.791457837	0.792389133	0.84931447	0.844509229	0.851766681	0.861861754	0.903856517	0.92854796	0.939852767	0.940888276	0.96229783	0.95361267	0.93192299	0.991189956
14:45:47.549	0.925004684	0.998823638	0.76628767	0.783600736	0.791321998	0.792374147	0.849168332	0.844359074	0.851584222	0.861626441	0.903528982	0.928269663	0.939553368	0.940537496	0.961969713	0.953332239	0.931724619	0.990961396
14:45:48.586	0.924335099	1.003248461	0.766235359	0.783552013	0.791240003	0.792260667	0.849054097	0.844144082	0.851350483	0.861323037	0.903208319	0.927816753	0.939035139	0.940101631	0.961370526	0.952821405	0.931261973	0.990425863
14:45:49.536	0.92154302	0.999964203	0.766201094	0.783557598	0.791266945	0.79228875	0.849040043	0.844144767	0.851310556	0.86128594	0.903201327	0.927838162	0.939126335	0.940174601	0.961700782	0.953327601	0.931829495	0.991195332
14:45:50.486	0.92696926	0.985965047	0.766252619	0.783507915	0.791178541	0.792105062	0.848878616	0.843946436	0.851074331	0.861000332	0.902868286	0.927424575	0.938668351	0.939757155	0.961180833	0.952899474	0.931525325	0.990827702
14:45:51.437	0.922482711	1.001116877	0.76624655	0.783363574	0.791050823	0.792040605	0.848654576	0.843636485	0.850758709	0.860588655	0.90226496	0.92675073	0.93800027	0.939020299	0.960306298	0.952055671	0.930706731	0.989849799
14:45:52.474	0.921662158	0.993911658	0.76610439	0.783278736	0.791044492	0.791947676	0.848560627	0.843528324	0.850643329	0.860454169	0.902149155	0.926631961	0.937881743	0.93888635	0.960257938	0.952225288	0.930973984	0.990142012
14:45:53.424	0.921913451	1.002954823	0.766018359	0.783204936	0.790944234	0.791882546	0.848336136	0.843316445	0.850367743	0.860123911	0.901686125	0.926143747	0.937382985	0.938396655	0.959744154	0.951801167	0.930638947	0.989748944
14:45:54.374	0.917017515	1.000487995	0.765799455	0.783169176	0.790789251	0.791687926	0.84814373	0.843028028	0.850067246	0.859712628	0.901101519	0.925470084	0.936703236	0.937728173	0.958912036	0.951007447	0.929843389	0.988841394
14:45:55.411	0.922923099	0.997251815	0.766003348	0.783119779	0.790713501	0.791721255	0.848014735	0.84287248	0.849871531	0.85950003	0.900883456	0.925162045	0.936409439	0.93746059	0.958727994	0.950900551	0.929794867	0.988879016
14:45:56.362	0.920664127	0.991841131	0.765913979	0.783036184	0.790638452	0.791619717	0.847858869	0.842666779	0.84963936	0.859228257	0.900522812	0.924829418	0.936058628	0.937056634	0.958310023	0.950605651	0.929612829	0.988661797
14:45:57.312	0.922126432	0.999004981	0.765768862	0.782988095	0.790581653	0.791530602	0.847724678	0.842545296	0.849446107	0.859001678	0.900383037	0.924642246	0.935824602	0.936796963	0.958140419	0.950678951	0.929652541	0.988759462
14:45:58.349	0.924767992	0.999649762	0.765714293	0.782883202	0.790460729	0.791393366	0.847643369	0.842374268	0.849266545	0.858753384	0.900020793	0.924322632	0.935460629	0.93645494	0.957794308	0.950483402	0.929510083	0.988698316
14:45:59.299	0.924919565	0.993500907	0.765764566	0.782858779	0.790516805	0.791421842	0.847572832	0.842325535	0.849208616	0.8587163	0.899989149	0.924289632	0.935563677	0.93655948	0.958139404	0.951032342	0.930107252	0.989489013
14:46:00.250	0.92256007	1.004838106	0.765660581	0.782747924	0.790329881	0.791227922	0.847326868	0.842015083	0.848860784	0.85823683	0.899294207	0.923564379	0.934808605	0.935735249	0.957065532	0.949900121	0.928994751	0.988200297
14:47:15.418	0.924407395	1.0078721	0.762876388	0.779500173	0.787578235	0.788415851	0.843982718	0.83796891	0.844061772	0.852464419	0.892464039	0.916700868	0.927573787	0.928804713	0.949965523	0.944136293	0.92605447	0.983299517
14:47:16.368	0.91890014	0.985652517	0.762752977	0.77947419	0.787732933	0.788568345	0.844131303	0.837996872	0.844056547	0.852528178	0.892741212	0.916502558	0.927793048	0.92888407	0.950033627	0.944181561	0.926147661	0.983296148
14:47:17.318	0.915894056	0.992255556	0.762784998	0.779562483	0.787852888	0.788626862	0.844291107	0.838085214	0.84416422	0.852651532	0.892936126	0.916753273	0.928103628	0.929126927	0.950315264	0.944560966	0.926662475	0.98369382
14:47:18.355	0.921489619	0.995418376	0.762679869	0.77949945	0.787692855	0.788575274	0.844183355	0.8380259	0.844053264	0.852510329	0.892680983	0.916487001	0.927750465	0.928839284	0.949919447	0.944070697	0.926192048	0.983136042
14:47:19.306	0.91304496	0.989724728	0.762775087	0.779533867	0.78775541	0.788625046	0.844185074	0.838097664	0.844146552	0.852617661	0.892883356	0.916622943	0.928104275	0.929107863	0.950303078	0.944469919	0.926733409	0.98366157
14:47:20.256	0.91833502	0.990351203	0.762664749	0.77941878	0.787681737	0.788576203	0.844185057	0.838037142	0.84405694	0.852483276	0.89275467	0.916531075	0.927947801	0.928912455	0.950088447	0.944197636	0.926486905	0.983316218
14:47:21.206	0.917853787	0.981729374	0.762862201	0.779394752	0.787670887	0.788514259	0.844054202	0.837913696	0.843958862	0.852353852	0.89255761	0.916282555	0.927724569	0.928693399	0.949771769	0.943853063	0.926182197	0.982908849
14:47:22.243	0.916124394	0.993987705	0.76262237	0.779373856	0.787692894	0.788563485	0.844206932	0.837945604	0.844006804	0.852454594	0.892718646	0.916433644	0.927885211	0.9289112	0.950092099	0.944199147	0.926660146	0.983408245
14:47:23.194	0.923071187	0.99207635	0.76269908	0.779295878	0.78761994	0.788564149	0.844089504	0.83798724	0.844006715	0.852449437	0.892553308	0.916503635	0.927912345	0.9289257	0.950146813	0.944221468	0.926722967	0.98346476
14:47:24.144	0.920048835	0.987664948	0.76258985	0.779316237	0.787663589	0.788493185	0.844143759	0.837983904	0.844041894	0.852479345	0.892627664	0.916617827	0.928132921	0.929043903	0.950362831	0.944537989	0.927047993	0.983870936
14:47:25.181	0.91646288	0.984498214	0.762561397	0.779275556	0.787651285	0.788500488	0.844166811	0.838004046	0.844070783	0.852539871	0.892691636	0.916770191	0.928257038	0.929194121	0.950470034	0.94479924	0.927373044	0.984176347
14:47:26.131	0.914717791	0.985003686	0.762490539	0.779258871	0.787583094	0.788419398	0.844126074	0.837994175	0.844012694	0.852483779	0.89267408	0.916705069	0.928314347	0.929166791	0.950432485	0.944892229	0.927447371	0.984223007
14:47:27.082	0.916735435	0.996257838	0.762548627	0.779181413	0.787605418	0.788453435	0.844209264	0.838092803	0.844090377	0.852616144	0.892860215	0.916840293	0.928573685	0.929386176	0.950785252	0.945345685	0.927964536	0.984727143
14:47:28.118	0.917196647	0.998913349	0.762451713	0.779116272	0.78754675	0.788414424	0.844106057	0.837939679	0.843971262	0.85241213	0.892612901	0.916603683	0.928229566	0.929051507	0.950387664	0.944897273	0.927590448	0.984227415
14:47:29.069	0.916796379	0.991690932	0.762573217	0.779167502	0.787505224	0.788365949	0.843979923	0.837799315	0.84379036	0.852201288	0.892233165	0.916143979	0.927834604	0.928563769	0.949812787	0.944217479	0.927050941	0.983621508
14:47:30.019	0.920924031	0.993410865	0.762591921	0.779090074	0.787483364	0.788362648	0.843975228	0.837834464	0.843813529	0.852205166	0.892431131	0.916317675	0.92797342	0.928708296	0.95013127	0.944700204	0.927575713	0.984045975
14:47:31.056	0.91469318	0.995476694	0.762387112	0.779074221	0.787440945	0.788308126	0.843951282	0.837744836	0.84373696	0.852139055	0.892291751	0.916187611	0.927931853	0.928653499	0.950109426	0.94471325	0.927694259	0.984183337
14:47:32.006	0.916411191	0.991933459	0.762408819	0.779065601	0.787407229	0.788234407	0.84396181	0.83771229	0.843670446	0.852072275	0.892247868	0.916182586	0.927841982	0.928641522	0.950178738	0.944911338	0.928010201	0.984422648
14:47:32.957	0.9172946	0.982813292	0.762345845	0.778968447	0.787360336	0.788228569	0.843819828	0.837545143	0.843478861	0.851812839	0.891916258	0.91578922	0.927512498	0.928228612	0.949646949	0.944422882	0.927561687	0.983909518
14:47:33.907	0.920674327	0.997434754	0.762113015	0.778917001	0.787263322	0.788150474	0.843692936	0.837427372	0.843297433	0.851629977	0.891640579	0.915592291	0.927308644	0.928018876	0.949472877	0.944303349	0.927520365	0.983849625
14:47:34.944	0.917732447	0.989479331	0.762216956	0.778801656	0.78719704	0.788076101	0.843531553	0.83723105	0.843126061	0.851377367	0.891345939	0.915249939	0.926897808	0.92770026	0.949029912	0.943867652	0.927179792	0.983475053
14:47:35.894	0.918576011	0.996475435	0.762087257	0.77876611	0.787142189	0.78797704	0.843438241	0.837084133	0.8429288	0.851145785	0.891058106	0.914855606	0.926635569	0.927315674	0.948733662	0.943735321	0.927019057	0.983264205
14:47:36.845	0.916466621	0.994481049	0.76198246	0.778780726	0.787116008	0.787931939	0.843423984	0.837071251	0.842887123	0.851070442	0.891042573	0.914916036	0.926630608	0.927404735	0.948927713	0.944054231	0.927480421	0.983872078
14:47:37.882	0.918133592	0.993542416	0.762099701	0.778586531	0.787057356	0.78794572	0.843263866	0.836909833	0.842709401	0.850852996	0.890849748	0.914640162	0.926315897	0.927110702	0.948665046	0.943895547	0.927317557	0.983648265
14:47:38.832	0.91993011	0.9975056	0.762085898	0.778588385	0.786930662	0.787803635	0.842983018	0.836585382	0.842360034	0.850375619	0.890134555	0.913903016	0.925481429	0.926324382	0.947630104	0.942813157	0.926393491	0.982553113
14:47:39.782	0.91444275	0.990320206	0.762010599	0.778495234	0.786772027	0.787620788	0.842704833	0.836221936	0.841927138	0.849840966	0.889424355	0.912994946	0.924373803	0.925329118	0.94651217	0.941452405	0.925139637	0.981149659
14:47:40.733	0.915636996	0.988614368	0.761893959	0.778489161	0.786658379	0.787576523	0.842577868	0.836121667	0.84175507	0.84966116	0.889322332	0.912843246	0.92426402	0.925176878	0.946439465	0.941603219	0.925370651	0.981384956
14:47:41.770	0.915675971	0.985031833	0.761686795	0.778462875	0.78663391	0.787534709	0.842445838	0.835943053	0.841559628	0.849409239	0.888955515	0.912476995	0.923897532	0.92483413	0.946105225	0.941347213	0.925206507	0.981190803
14:47:42.720	0.907653444	0.983524912	0.761910899	0.778284587	0.786549159	0.78744756	0.842367413	0.835803962	0.841408138	0.849252204	0.888710413	0.91233171	0.923815828	0.924703183	0.946024307	0.941566194	0.925536602	0.981535761
14:47:43.670	0.914899926	0.988568045	0.761633538	0.778331179	0.786524007	0.787418706	0.842288621	0.835641834	0.841225107	0.84901853	0.888463643	0.91204436	0.923494922	0.924392948	0.945785378	0.941484468	0.925465323	0.981464833
14:47:44.707	0.914143595	0.97695579	0.761636025	0.778167613	0.786370496	0.787266441	0.842078645	0.835425684	0.840978535	0.848714954	0.888049055	0.911662473	0.92299603	0.923940365	0.945341137	0.941175278	0.925215475	0.981212268
14:47:45.658	0.915453127	0.983059145	0.761556408	0.778081633	0.786247462	0.787182593	0.841829894	0.835123299	0.840621934	0.848230509	0.887525789	0.910935247	0.922241287	0.923215795	0.944491859	0.940368813	0.924542789	0.980418626
14:47:46.608	0.91356737	0.989852896	0.761521576	0.778008486	0.78617896	0.787023132	0.841673923	0.834943415	0.840405526	0.84801692	0.88728632	0.910649999	0.921984947	0.922955955	0.944341745	0.940407169	0.924663995	0.980648727
14:47:47.645	0.910578961	0.983333048	0.761222029	0.77790997	0.786131546	0.786902966	0.841569903	0.834773301	0.840226812	0.847790021	0.887036826	0.910370507	0.921717325	0.922684565	0.94412177	0.940413774	0.924784963	0.980755994
14:47:48.595	0.913580507	0.979134814	0.761211085	0.777865922	0.785975358	0.786810772	0.841217784	0.834436357	0.839818605	0.847253766	0.886387237	0.909555564	0.920831386	0.921884317	0.943194216	0.939556566	0.92396656	0.979875772
14:47:49.546	0.912807057	0.981894163	0.761040472	0.777642255	0.785767041	0.78664585	0.841027648	0.834131554	0.839466984	0.846847926	0.885869343	0.908955134	0.920309512	0.921281642	0.942547554	0.93903417	0.923530798	0.97950747
14:47:50.496	0.912102407	1.003424401	0.761105664	0.77755599	0.785731877	0.786494462	0.84083582	0.83391727	0.839229373	0.846574005	0.885577479	0.908647644	0.919897674	0.920906871	0.942208987	0.938804814	0.923361139	0.979278909
14:47:51.533	0.910482684	0.99739377	0.761047567	0.777378648	0.785515288	0.78628834	0.840508434	0.833486059	0.838725231	0.845909977	0.884720282	0.907633003	0.918740517	0.919800001	0.940994754	0.937413287	0.922085169	0.977890206
14:47:52.483	0.909789847	0.988769793	0.760871675	0.77733215	0.785437438	0.786211069	0.840365773	0.833342571	0.83852157	0.84570051	0.884394769	0.907407337	0.918505483	0.919600027	0.940853491	0.937589107	0.922333902	0.978186162
14:47:53.434	0.912552574	0.985289835	0.760767248	0.777226011	0.785290307	0.78607155	0.840047104	0.833002016	0.83818159	0.845255002	0.883792474	0.906839947	0.917775389	0.918915941	0.940130378	0.936902595	0.921808475	0.977549184
14:47:54.470	0.912588738	0.983651356	0.76080521	0.777274357	0.785265737	0.786135805	0.840002958	0.832964214	0.838093417	0.845157439	0.883789043	0.906755301	0.9177501	0.918908852	0.940273396	0.93740336	0.922373582	0.978149297
14:47:55.421	0.915824433	0.989083306	0.76073605	0.77716311	0.785194487	0.786074009	0.839968186	0.832863174	0.837964906	0.844985844	0.883568966	0.90657912	0.917634951	0.918758794	0.940254316	0.937571402	0.922657053	0.978502846
14:47:56.371	0.914034749	0.981814081	0.760629704	0.777108725	0.785040829	0.785864582	0.839681571	0.832507427	0.837550055	0.844430744	0.882801473	0.905775472	0.916700819	0.917825311	0.93908706	0.936364982	0.921498318	0.977246314
14:47:57.408	0.9148372	0.994923259	0.760640008	0.777108035	0.784967905	0.785774629	0.839469246	0.832254654	0.837240766	0.844038064	0.882260157	0.905265886	0.916169816	0.917217274	0.938422227	0.935786308	0.920942539	0.9767031
14:47:58.358	0.913152146	0.995610215	0.760680351	0.776961143	0.784756736	0.78558315	0.839123101	0.831823562	0.836742639	0.843412466	0.881261884	0.904272119	0.915044514	0.916138053	0.937113696	0.934319948	0.919580625	0.975064626
14:47:59.309	0.917657635	0.997708922	0.760403432	0.77685081	0.784689452	0.785527992	0.839008732	0.831713123	0.83661036	0.843267863	0.88123537	0.904157791	0.915069086	0.916120543	0.937285439	0.934942647	0.920185322	0.975990818
14:48:00.346	0.914021605	0.983238821	0.760435938	0.776866608	0.784679451	0.785490181	0.839027411	0.831657231	0.836541629	0.843200554	0.881227108	0.904128062	0.915107992	0.916173057	0.937555665	0.935411955	0.920722867	0.976650034
14:49:15.859	0.912223466	1.013605554	0.755944653	0.771204486	0.778707206	0.77943125	0.82950482	0.820261948	0.823259294	0.827080427	0.862095774	0.882868115	0.893393663	0.894290705	0.915956615	0.920213827	0.911616039	0.964555719
14:49:16.810	0.904958803	0.97652457	0.75559508	0.771282286	0.778639549	0.779357455	0.829108247	0.819870809	0.822868855	0.826559119	0.860951558	0.881799761	0.892444159	0.893383298	0.914614136	0.918608051	0.910289943	0.962975012
14:49:17.760	0.903984123	0.965704069	0.755586193	0.771273677	0.778619416	0.779310397	0.828995474	0.819697	0.822672564	0.826294694	0.860560303	0.881449786	0.891935539	0.8929561	0.914182956	0.918247953	0.910122722	0.962694579
14:49:18.710	0.905236956	0.97152905	0.755817912	0.771249332	0.778492182	0.779329566	0.82887857	0.819534163	0.822470651	0.826043288	0.860269347	0.881039718	0.891549537	0.892517425	0.91367414	0.91765511	0.90958963	0.962091132
14:49:19.747	0.904379854	0.985542736	0.755583105	0.771250406	0.778456531	0.779250878	0.828797468	0.819440131	0.822366168	0.825885233	0.860085849	0.880860476	0.891413877	0.892415735	0.913622578	0.917735041	0.909683904	0.962263755
14:49:20.698	0.904937033	0.988258776	0.75545059	0.771154767	0.778369751	0.779150804	0.828637406	0.819230418	0.822174106	0.825662589	0.859855288	0.880641382	0.891124046	0.892086629	0.913338205	0.917565295	0.909573421	0.962143719
14:49:21.648	0.905021501	0.986259037	0.755365074	0.771085242	0.77821196	0.778966446	0.828438349	0.819013722	0.82186205	0.825274268	0.859305983	0.879838292	0.890347166	0.891373503	0.912435086	0.91649586	0.908563834	0.960966725
14:49:22.685	0.907054863	0.987684476	0.755429735	0.771014758	0.778155058	0.77892618	0.828294631	0.818815974	0.821633362	0.82499167	0.85896403	0.879391456	0.889888865	0.890927414	0.911900781	0.915921245	0.908063929	0.960425528
14:49:23.635	0.905514857	0.972353609	0.75532611	0.770906579	0.778135118	0.778879901	0.828140422	0.8186683	0.821501622	0.824811849	0.858730952	0.879244742	0.889743669	0.890723128	0.911729073	0.915933966	0.908098439	0.960461275
14:49:24.586	0.906234755	0.979313963	0.755280758	0.770836813	0.778029922	0.778735237	0.828090888	0.818555832	0.821374136	0.824671494	0.858601456	0.879038984	0.889587674	0.890607846	0.911713338	0.916084636	0.908324271	0.960767691
14:49:25.622	0.902090779	0.969979772	0.755006482	0.770780143	0.777951763	0.778761791	0.827970063	0.818421306	0.821179365	0.824432562	0.858379677	0.878724714	0.889281911	0.890260095	0.911324828	0.915794726	0.908048155	0.960504529
14:49:26.573	0.904415001	0.982228199	0.754963786	0.770729999	0.777873628	0.778677083	0.827788897	0.818186209	0.82092436	0.824108956	0.857903077	0.878205456	0.888689717	0.889710704	0.910619229	0.915072957	0.907364608	0.959725939
14:49:27.523	0.906187532	0.980645722	0.755004365	0.77059704	0.777804193	0.778535027	0.827600413	0.818030814	0.82073058	0.823870768	0.857581891	0.877859148	0.888344685	0.889339868	0.910237801	0.914653265	0.907006151	0.95935454
14:49:28.474	0.911987318	0.97207101	0.754911971	0.770502785	0.777680444	0.778462678	0.82750992	0.817889822	0.820565781	0.823670644	0.857359295	0.877635678	0.888138839	0.889132986	0.910071757	0.914697573	0.907040976	0.959447285
14:49:29.510	0.907133864	0.981692521	0.754944751	0.77049107	0.7776579	0.778326102	0.827366804	0.817764601	0.820393834	0.823449589	0.857120337	0.877294441	0.887844899	0.888838897	0.909765073	0.914506329	0.90682454	0.959268151
14:49:30.461	0.907827249	0.975115205	0.754960854	0.770396343	0.777546276	0.778234106	0.827264754	0.817546823	0.820184004	0.823191696	0.856828745	0.876963389	0.887433047	0.888489324	0.909372006	0.914201317	0.90653631	0.959035733
14:49:31.411	0.902818665	0.971144051	0.754967902	0.770342351	0.7774184	0.778120256	0.82700223	0.817311418	0.819888848	0.822828756	0.856322397	0.876464559	0.88689919	0.887880226	0.908670821	0.913489425	0.905851407	0.958310389
14:49:32.448	0.904457973	0.972324338	0.754684171	0.770185085	0.777372905	0.778094602	0.826919725	0.817202718	0.819743861	0.822694443	0.85621929	0.876251671	0.886799087	0.887746988	0.908622724	0.913673035	0.906108102	0.958599775
14:49:33.398	0.907596846	0.965889305	0.754594463	0.770131715	0.777218736	0.777904482	0.826718688	0.816992866	0.819497736	0.822381037	0.855796517	0.875874185	0.886305628	0.88729855	0.908133567	0.913251291	0.905689354	0.958186652
14:49:34.349	0.903781658	0.977932158	0.754501042	0.770136462	0.777179284	0.777934676	0.826611157	0.816854381	0.81934716	0.822176499	0.85559223	0.875678362	0.886173077	0.887080936	0.908008148	0.913324769	0.905826035	0.958344374
14:49:35.386	0.904171727	0.972827381	0.754434141	0.769946782	0.777085766	0.777861948	0.82651062	0.816679687	0.819203712	0.822003186	0.855396696	0.875499419	0.886003194	0.88691351	0.907945179	0.913470993	0.906053894	0.958702644
14:49:36.336	0.904544743	0.972825249	0.7544193	0.769946482	0.776960617	0.777758892	0.826300016	0.816455982	0.818927283	0.821643999	0.85495139	0.874955981	0.885365766	0.886351461	0.907326033	0.912805222	0.905476629	0.957993564
14:49:37.286	0.906746604	0.974055089	0.754431637	0.769850018	0.776846617	0.777681614	0.826129351	0.816254558	0.818659712	0.821336514	0.854627093	0.874531776	0.884979209	0.885879584	0.906883361	0.912389681	0.905200732	0.957627034
14:49:38.237	0.901515196	0.969908996	0.754395631	0.769775537	0.776756211	0.777553918	0.826001832	0.81608288	0.818468888	0.821111712	0.854381965	0.874184336	0.884689309	0.885574661	0.906629927	0.9123542	0.905188753	0.957626394
14:49:39.274	0.902909431	0.980294355	0.754145461	0.769682743	0.776690042	0.777424309	0.825887175	0.81590562	0.818255233	0.820871297	0.854024438	0.873901069	0.884312649	0.885279421	0.906381603	0.912196356	0.905160225	0.957639082
14:49:40.224	0.905973223	0.975798812	0.754224181	0.769598252	0.776583252	0.777310727	0.825754218	0.815769529	0.818061189	0.82065175	0.853839213	0.873630381	0.884104662	0.885006692	0.906103997	0.912085149	0.905157163	0.957661793
14:49:41.174	0.905240191	0.974161968	0.754062871	0.769550861	0.776467278	0.777330928	0.825486774	0.815516792	0.817803305	0.820331881	0.853394375	0.873102231	0.883573431	0.884496355	0.905541893	0.911616171	0.904638957	0.957086358
14:49:42.211	0.900552305	0.976361454	0.753997551	0.769369985	0.776385554	0.777075122	0.825351493	0.815303829	0.817556141	0.820000131	0.852974595	0.872584541	0.883085267	0.884036759	0.905028235	0.911063805	0.904245301	0.956610107
14:49:43.162	0.900603884	0.965407332	0.753949977	0.769375062	0.7763364	0.77712051	0.825314442	0.815263319	0.817532346	0.819970941	0.853069134	0.872770214	0.883301559	0.884188362	0.905453994	0.911801004	0.905107112	0.957612641
14:49:44.112	0.901127466	0.970887631	0.753935177	0.769260873	0.77622011	0.776907712	0.825119164	0.815026512	0.817273252	0.819610691	0.852591205	0.872253748	0.882719206	0.883636856	0.904821726	0.911140084	0.904580847	0.956979811
14:49:45.149	0.902843201	0.977307187	0.753727742	0.769103026	0.776116249	0.776883552	0.824979509	0.814838956	0.817031032	0.819359871	0.852220622	0.871913142	0.882311832	0.88323406	0.9044067	0.910851706	0.904311135	0.956652176
14:49:46.099	0.900718198	0.983490832	0.753724198	0.769065451	0.776060139	0.776751076	0.824861487	0.814682956	0.816864983	0.81917548	0.852082084	0.871698955	0.882127362	0.883031135	0.904242991	0.910879987	0.90442047	0.95675749
14:49:47.050	0.899809393	0.969312355	0.753453296	0.769039562	0.775959653	0.776682189	0.824645339	0.814469945	0.81661526	0.81885119	0.851583088	0.871089709	0.881498165	0.882473094	0.90360264	0.910268454	0.903886334	0.956095491
14:49:48.086	0.900591529	0.964803462	0.75354933	0.768955162	0.775918428	0.776657634	0.824499723	0.814421506	0.816536704	0.81879103	0.851556404	0.871154974	0.881613689	0.882526458	0.903834803	0.910752508	0.904444663	0.956753575
14:49:49.037	0.900553016	0.978189073	0.753631286	0.768926956	0.775815939	0.776632929	0.824421628	0.814198324	0.816295383	0.818493021	0.85124807	0.870688298	0.881127519	0.882092185	0.903286138	0.910244011	0.904052187	0.956283609
14:49:49.987	0.901605355	0.979352992	0.753602024	0.768812173	0.775734572	0.776585127	0.82433883	0.814146673	0.816200541	0.818394426	0.851142414	0.870682837	0.881145586	0.882101389	0.903501991	0.910701734	0.904620181	0.956866972
14:49:50.938	0.902611723	0.975764953	0.753495693	0.76877397	0.77568553	0.776443359	0.824207097	0.813979196	0.816013686	0.818153922	0.850859075	0.870336715	0.880834606	0.881745194	0.903161526	0.910407282	0.904457045	0.956692252
14:49:51.974	0.903355212	0.973689446	0.753394473	0.768705032	0.775619782	0.776347416	0.82400799	0.813759601	0.81577257	0.817871745	0.850464442	0.869885168	0.880379947	0.881299561	0.902601464	0.909856828	0.903929939	0.956108592
14:49:52.925	0.902937651	0.972614064	0.753269339	0.768546854	0.775503648	0.776236517	0.823850165	0.813502206	0.815475088	0.81746523	0.84989244	0.869362623	0.879727943	0.880620118	0.901697627	0.90892517	0.903046704	0.955184532
14:49:53.875	0.904044994	0.971278733	0.753166383	0.768529779	0.775425087	0.776089366	0.823652838	0.813301612	0.815262467	0.817202852	0.849592354	0.868881242	0.879342213	0.880186762	0.90123214	0.908467518	0.90260086	0.954614701
14:49:54.912	0.904075964	0.977885086	0.753192916	0.76843393	0.775297787	0.776009533	0.823504982	0.813102685	0.815012233	0.81688789	0.849179047	0.868328726	0.87885707	0.879658756	0.900669041	0.907897229	0.902056126	0.953947268
14:49:55.862	0.903666122	0.974559042	0.753102534	0.76839089	0.775200111	0.775951248	0.823390198	0.813008614	0.814911907	0.816788402	0.849046505	0.868282853	0.878866107	0.879654527	0.900707667	0.908204477	0.902413539	0.954440522
14:49:56.813	0.904541232	0.973964108	0.752991498	0.768289969	0.775159707	0.775857878	0.823344701	0.81286779	0.814748381	0.816575581	0.8487818	0.868029706	0.878524728	0.879415793	0.900461137	0.908083828	0.902431453	0.954456034
14:49:57.850	0.903169404	0.974278608	0.753043296	0.768258759	0.775064858	0.775775655	0.823120454	0.812703815	0.814525257	0.816345274	0.848461123	0.867605607	0.878207846	0.878966454	0.900011016	0.907631852	0.901965745	0.953914395
14:49:58.800	0.900458271	0.96907828	0.753037623	0.76827516	0.774955919	0.77575322	0.823042448	0.812569711	0.814432301	0.816188975	0.848311084	0.867461226	0.878011933	0.878859434	0.899972461	0.907696262	0.902101186	0.954082798
14:49:59.750	0.896164054	0.972616066	0.752845618	0.768140589	0.774927158	0.775610411	0.822979873	0.812429652	0.814232003	0.815968105	0.848057302	0.867186053	0.877750327	0.878562799	0.899654819	0.907434141	0.901916598	0.953903756
14:50:00.787	0.899251664	0.975610686	0.752951834	0.768008402	0.774791889	0.775540954	0.822771384	0.812262372	0.814069391	0.815765431	0.847842008	0.867002679	0.877496486	0.878291386	0.899411227	0.907246471	0.901738236	0.953756972
14:51:15.869	0.913612445	0.962019707	0.74838667	0.763009384	0.76983384	0.77057925	0.815402637	0.803589816	0.804182482	0.803996288	0.834117846	0.851507381	0.861632738	0.862476263	0.883555891	0.895393953	0.89335142	0.944109954
14:51:16.819	0.895382911	0.966283261	0.748282008	0.762958627	0.76977563	0.770346464	0.815398765	0.80348979	0.804069702	0.803819387	0.833617732	0.851329084	0.861485616	0.862243765	0.883135433	0.895094518	0.892999298	0.943895495
14:51:17.770	0.890775423	0.965384456	0.748384925	0.76301353	0.769749546	0.770308856	0.815399299	0.80349576	0.80403004	0.803760555	0.833580261	0.85123669	0.861380258	0.862193547	0.883101742	0.895144968	0.893112042	0.943959463
14:51:18.806	0.892102455	0.953317035	0.748185705	0.762948135	0.7696536	0.770269443	0.815206045	0.803282364	0.803800509	0.803428175	0.833114022	0.850695688	0.860783617	0.861563185	0.88220025	0.89407145	0.892034577	0.942762667
14:51:19.757	0.89329793	0.957559674	0.748213582	0.762793125	0.769560357	0.77020376	0.81512876	0.803186025	0.803705385	0.803335755	0.832911617	0.850561312	0.860640932	0.861456643	0.8821345	0.894017129	0.892045442	0.942800589
14:51:20.707	0.889540622	0.969797362	0.748122762	0.762780335	0.769505284	0.770162367	0.815112539	0.803155542	0.80368829	0.803309115	0.832980118	0.850639772	0.860775384	0.861540424	0.882411198	0.89447058	0.892526933	0.943363719
14:51:21.658	0.893887708	0.953766029	0.748067776	0.762792809	0.769408648	0.770140403	0.814997395	0.802986774	0.803482076	0.803069501	0.832606912	0.850224903	0.860293417	0.861125229	0.88178229	0.89375923	0.891862803	0.942574148
14:51:22.694	0.893410951	0.965558519	0.748128042	0.762703305	0.769432358	0.770115706	0.814875039	0.802868408	0.803355894	0.802932264	0.832506623	0.84997813	0.860044441	0.860927952	0.881548966	0.893518325	0.891622058	0.942234393
14:51:23.645	0.890568722	0.959148747	0.748078766	0.762655852	0.76935492	0.770065074	0.81482384	0.802831738	0.803309774	0.802871159	0.832412213	0.849962255	0.860104056	0.860899006	0.881625107	0.893713996	0.891903544	0.942527408
14:51:24.595	0.891422933	0.955775638	0.74792995	0.762544966	0.769298534	0.769934175	0.81469326	0.802707289	0.803173121	0.802714368	0.832226339	0.849773764	0.859843785	0.86064183	0.881285391	0.893351065	0.891591606	0.942119914
14:51:25.632	0.890978587	0.961754355	0.747912832	0.762487873	0.76923144	0.769873184	0.814676463	0.802655215	0.803134253	0.802711129	0.832211211	0.849811086	0.859820942	0.860673141	0.881445381	0.893701323	0.892013548	0.94254237
14:51:26.582	0.890494239	0.959508562	0.747797115	0.762428703	0.769223579	0.769886505	0.814668385	0.802654231	0.803154829	0.80273137	0.832273751	0.850048087	0.860123027	0.860925854	0.881904929	0.894457803	0.892818942	0.94350063
14:51:27.533	0.893916722	0.965304312	0.747686307	0.762459799	0.769227849	0.769874957	0.814715607	0.802700457	0.803247182	0.802893995	0.832473614	0.850326891	0.860506166	0.861298105	0.882522747	0.895343289	0.893797439	0.944495788
14:51:28.483	0.895920883	0.960283973	0.747785671	0.762400361	0.769133711	0.76976086	0.814623641	0.802597215	0.803110687	0.802707268	0.832206229	0.850137944	0.860216787	0.861075261	0.882177325	0.89496913	0.893506113	0.944156206
14:51:29.520	0.893506196	0.956263514	0.747819161	0.762255128	0.769072665	0.769742869	0.814496645	0.802474266	0.802940129	0.802509216	0.832049309	0.849753588	0.859918324	0.860744832	0.881717205	0.89446552	0.893074476	0.943668679
14:51:30.470	0.890456806	0.967337023	0.747750466	0.762268937	0.769013276	0.769591504	0.814409951	0.802354113	0.802832687	0.802399261	0.831851181	0.849619589	0.859805584	0.860628797	0.881637067	0.894541631	0.893198471	0.943673319
14:51:31.421	0.891930227	0.952575815	0.747758187	0.762183739	0.768923542	0.769530062	0.814271642	0.802151351	0.802612855	0.802126222	0.831471758	0.84921935	0.859304954	0.860132347	0.881013926	0.893733295	0.892578661	0.942966486
14:51:32.458	0.890781907	0.961323885	0.747492508	0.762072723	0.768854825	0.769497579	0.814146234	0.802061086	0.802488939	0.801967041	0.831282176	0.848963052	0.8590571	0.859908849	0.880752468	0.893532566	0.892440486	0.942755483
14:51:33.408	0.897940982	0.959630047	0.747525746	0.762073393	0.768772711	0.769424988	0.814093762	0.801977982	0.802398692	0.801851287	0.83126619	0.848863593	0.859045555	0.85985345	0.88076868	0.893672235	0.892717077	0.942996054
14:51:34.358	0.896851878	0.962944512	0.747442124	0.762014516	0.768718042	0.769320787	0.813974336	0.801785618	0.802217453	0.801607215	0.830894313	0.84854345	0.858614747	0.859490594	0.880398486	0.893287185	0.89241727	0.942644876
14:51:35.395	0.894326549	0.964477658	0.747275782	0.761841302	0.768602484	0.769204111	0.813806863	0.801615306	0.802025637	0.80141029	0.830649757	0.84821238	0.858333742	0.859199959	0.880081366	0.893055813	0.892257459	0.942414495
14:51:36.346	0.895929752	0.964447442	0.747301031	0.76174785	0.768543596	0.769026209	0.813709105	0.801455166	0.80182061	0.801162644	0.830394962	0.84784382	0.857921487	0.858789656	0.879587762	0.892545066	0.891868562	0.941941044
14:51:37.296	0.89248448	0.955302269	0.747202099	0.761748753	0.768459864	0.769022903	0.813445481	0.801226752	0.801584008	0.800828129	0.829921456	0.847348872	0.857359715	0.858193475	0.878867455	0.891785175	0.891191995	0.941200483
14:51:38.333	0.891802814	0.963400884	0.747177269	0.761691194	0.768307543	0.768970656	0.813366671	0.801084604	0.801381754	0.800615781	0.829647601	0.846927977	0.857011906	0.857797523	0.878432098	0.891423895	0.890892606	0.940799501
14:51:39.283	0.890166367	0.963874603	0.74715662	0.761633065	0.768273313	0.768965981	0.813216114	0.800920099	0.801184414	0.800352908	0.829323138	0.846564037	0.856653408	0.857466981	0.878079671	0.891243812	0.890819853	0.940686365
14:51:40.234	0.891480034	0.958997626	0.746975532	0.761513389	0.768193867	0.768758389	0.813141741	0.800783618	0.80104748	0.80020416	0.829207462	0.846409518	0.856485573	0.857314456	0.878070974	0.89144344	0.891103852	0.941031515
14:51:41.184	0.891999405	0.956721964	0.747013545	0.761425363	0.768124654	0.768725041	0.812903958	0.800546878	0.800763158	0.799861945	0.828756231	0.845902678	0.855997463	0.856751748	0.877420883	0.890842046	0.890639371	0.940471694
14:51:42.221	0.893166085	0.963475704	0.746832198	0.761288842	0.76796997	0.768611227	0.812686407	0.800227964	0.800398399	0.799360156	0.828091755	0.845014967	0.855149531	0.855886344	0.876273532	0.889526385	0.889382427	0.938958929
14:51:43.171	0.888408828	0.963458654	0.746730896	0.761300592	0.767922535	0.768517886	0.812582008	0.800128223	0.800338031	0.799281282	0.828026585	0.845016578	0.855131262	0.85588821	0.876428406	0.890065616	0.889933493	0.939734739
14:51:44.122	0.891039806	0.961742793	0.746822913	0.761230831	0.76776747	0.768455283	0.812355743	0.799869591	0.800009057	0.798869699	0.827430676	0.844300476	0.854355775	0.855148396	0.875481605	0.888933487	0.888919011	0.938560859
14:51:45.158	0.888903766	0.962931591	0.746620714	0.761181309	0.767744411	0.768416024	0.812347526	0.799874788	0.800035522	0.798934146	0.827568745	0.844618618	0.854791804	0.855491166	0.876121412	0.890088834	0.890062688	0.940027927
14:51:46.109	0.891551424	0.96839257	0.746539457	0.761116713	0.767687054	0.768373034	0.812228273	0.799725263	0.79987389	0.798765328	0.827383074	0.844317561	0.854511307	0.855229205	0.875907057	0.889997597	0.889981134	0.939993498
14:51:47.059	0.889118173	0.961691975	0.746489205	0.760951595	0.767595528	0.768181467	0.81207455	0.799536932	0.799649768	0.798480293	0.827070618	0.843903528	0.854072456	0.854722365	0.875352441	0.889468627	0.889441631	0.93946488
14:51:48.096	0.88970855	0.962392242	0.746575704	0.760919903	0.767580261	0.76819934	0.811992623	0.7994586	0.799559401	0.798382696	0.826896913	0.843762369	0.853967127	0.854626794	0.875314436	0.889512717	0.889581922	0.939618778
14:51:49.046	0.890449731	0.957404286	0.746555066	0.760889065	0.767466031	0.768125344	0.811918039	0.799369857	0.799461045	0.79825793	0.826759514	0.843554919	0.853746899	0.854500584	0.87515765	0.889508742	0.889557381	0.939559115
14:51:49.997	0.889344618	0.959078704	0.746563712	0.760895645	0.767428416	0.768025802	0.811829447	0.799282406	0.79936092	0.79815921	0.826641878	0.843491424	0.853590059	0.854343317	0.875015012	0.889336888	0.889558225	0.939509241
14:51:50.947	0.888033049	0.952207266	0.746247438	0.760748482	0.76739828	0.767993438	0.811823242	0.799196332	0.799298522	0.798051336	0.826577951	0.843459325	0.853586702	0.854273479	0.874929437	0.88936892	0.889604848	0.939468771
14:51:51.984	0.888898158	0.953298904	0.746294284	0.760762849	0.767364617	0.767986054	0.811829823	0.799211669	0.799271189	0.798043904	0.826563929	0.84342362	0.853474182	0.854308226	0.875080961	0.889571518	0.889833195	0.939670214
14:51:52.934	0.889321571	0.958809201	0.746272888	0.760701878	0.767375721	0.767993083	0.811780464	0.799199292	0.799306203	0.798101194	0.826644179	0.843661668	0.853716834	0.854520908	0.875420843	0.890094452	0.890428271	0.940433919
14:51:53.885	0.890153677	0.95611505	0.746262064	0.760635512	0.767291491	0.767959382	0.811828475	0.79921445	0.799293935	0.798102975	0.826623398	0.843715028	0.853797373	0.854572548	0.875578465	0.890280125	0.890628521	0.940635411
14:51:54.922	0.887830274	0.95584539	0.746293839	0.760611274	0.767236727	0.767948288	0.811684124	0.799013442	0.799111882	0.797837895	0.826288729	0.84324344	0.853265578	0.854062297	0.874826141	0.889372163	0.889668171	0.939471847
14:51:55.872	0.886038383	0.955757922	0.746118903	0.760478683	0.767199615	0.767768746	0.811528638	0.798926266	0.799007332	0.797730344	0.826124768	0.843049588	0.853042174	0.853878928	0.874515246	0.88900661	0.889356134	0.939113249
14:51:56.822	0.888111304	0.95465569	0.746058354	0.760477944	0.767126011	0.76777857	0.811504258	0.798856278	0.79894476	0.797650965	0.826023335	0.842957077	0.852950036	0.853755039	0.874401441	0.888813829	0.889208125	0.938969592
14:51:57.859	0.889287575	0.961097253	0.746089637	0.760410469	0.767111401	0.767761454	0.811471987	0.79885177	0.798907537	0.797626953	0.825971596	0.842940457	0.852897498	0.853758119	0.874418259	0.888801081	0.889213727	0.938937954
14:51:58.810	0.892546985	0.963007552	0.74601513	0.76037096	0.767041328	0.767727365	0.811459813	0.798803876	0.798870132	0.797585931	0.825957802	0.842889337	0.852906302	0.853726604	0.874407184	0.888793796	0.889222517	0.938894824
14:51:59.760	0.887173398	0.954356157	0.745982854	0.760354081	0.767077583	0.76768876	0.811462741	0.79883182	0.798903219	0.79763918	0.825992577	0.843047158	0.853114481	0.853854185	0.874609834	0.889084452	0.889574676	0.939279564
14:53:15.187	0.889283116	0.94380369	0.741399532	0.75564689	0.762202827	0.762935711	0.80437038	0.790646674	0.789872185	0.787015541	0.813228799	0.828544478	0.838161971	0.839001796	0.858839092	0.876289628	0.879249084	0.928066994
14:53:16.138	0.881065436	0.946825255	0.74152948	0.755398104	0.762090811	0.762647363	0.804344246	0.790510649	0.78979141	0.786850908	0.812969351	0.82850077	0.838181138	0.838849627	0.858746975	0.876135228	0.879126887	0.927927246
14:53:17.174	0.881634557	0.954170046	0.741544769	0.755477295	0.762119974	0.762651131	0.804396417	0.790530977	0.7898382	0.786898136	0.813088139	0.82866741	0.838263308	0.83905603	0.859122237	0.876720496	0.879833343	0.928664308
14:53:18.125	0.879982656	0.944961604	0.741583118	0.755323741	0.76204791	0.762576436	0.804298374	0.790450309	0.789716691	0.786767701	0.812899103	0.828410457	0.838191732	0.838884077	0.858955859	0.876613502	0.879817616	0.928694958
14:53:19.075	0.879172196	0.956516347	0.741498472	0.755271861	0.761952931	0.762493148	0.804206562	0.790329261	0.789562308	0.786603411	0.812657999	0.828258816	0.837917144	0.838640336	0.858734173	0.876471115	0.879742794	0.92859697
14:53:20.112	0.87645294	0.948586205	0.741398344	0.755242828	0.761846822	0.762397639	0.8039825	0.790135212	0.789338747	0.786327052	0.812292173	0.827835606	0.837504728	0.838197087	0.8581755	0.875901454	0.879191237	0.927937286
14:53:21.062	0.88152297	0.947411999	0.741255544	0.75519569	0.761829798	0.762300725	0.803868678	0.789947262	0.789143482	0.786029142	0.811852153	0.827378319	0.837029802	0.837718941	0.857598329	0.875326609	0.878656803	0.92734485
14:53:22.013	0.882484596	0.939758369	0.741281745	0.75507215	0.761729588	0.762271095	0.803766854	0.789806896	0.788988152	0.785838836	0.811617529	0.827069285	0.836763537	0.837408536	0.857228667	0.875062051	0.87838921	0.927088303
14:53:23.050	0.883373479	0.944872689	0.741281273	0.755063454	0.761610987	0.762186752	0.803603942	0.789652264	0.788817628	0.785664797	0.811378963	0.826872616	0.836469333	0.837174525	0.857017259	0.874948876	0.878326767	0.927068132
14:53:24.000	0.883280292	0.949297751	0.741152827	0.754946778	0.761595134	0.762050917	0.803541243	0.789519212	0.788666262	0.785466708	0.811230184	0.826542238	0.836222632	0.836870483	0.856705125	0.87468327	0.878082913	0.926865706
14:53:24.950	0.88033223	0.93800704	0.741153159	0.754934317	0.761457614	0.762033769	0.803423766	0.789395715	0.78850022	0.785268236	0.810968583	0.826308806	0.835888104	0.836618596	0.856469082	0.874611414	0.878020733	0.926822165
14:53:25.901	0.879340343	0.945574068	0.74098449	0.754880372	0.76141246	0.762026586	0.803303323	0.789223496	0.788331947	0.785052342	0.810565786	0.82594841	0.835557959	0.836225461	0.855996979	0.874189782	0.877658428	0.926422996
14:53:26.938	0.883923918	0.952372226	0.740889381	0.754786373	0.761281661	0.761881872	0.803213774	0.789094699	0.788180626	0.784885048	0.810418558	0.825747997	0.835289499	0.836048236	0.85577147	0.874069318	0.877575057	0.926379747
14:53:27.888	0.878085245	0.94383824	0.740944773	0.754666275	0.761254003	0.761836172	0.803064315	0.788950391	0.787985706	0.784646238	0.810107707	0.825320301	0.834929009	0.835689024	0.855404034	0.873712518	0.877187532	0.925999374
14:53:28.925	0.879872116	0.945072506	0.74093097	0.754625702	0.761118104	0.761827182	0.802909593	0.78884117	0.787880289	0.784547399	0.810017319	0.825267409	0.83482308	0.835600737	0.855264235	0.873722338	0.877262652	0.926158596
14:53:29.875	0.878802592	0.943169777	0.7409352	0.754593601	0.761125675	0.761663764	0.802803224	0.788653048	0.787692264	0.784275149	0.809624974	0.824775139	0.834319452	0.835083952	0.854636107	0.872977113	0.876486107	0.925326418
14:53:30.826	0.881906855	0.945120036	0.740832179	0.75449789	0.76101878	0.761582434	0.802717918	0.78851162	0.787517177	0.7840765	0.809321911	0.824372203	0.833912793	0.834688877	0.854198626	0.872395098	0.876026046	0.924775877
14:53:31.776	0.878292509	0.944794249	0.740636889	0.754456532	0.760965228	0.761524413	0.802530612	0.788378053	0.78739723	0.783912609	0.809046461	0.824129915	0.833664194	0.834402306	0.853855479	0.872166343	0.87571401	0.924498115
14:53:32.813	0.87973321	0.944326557	0.740512995	0.754386877	0.760946148	0.761490365	0.802498688	0.788338781	0.787357729	0.783868963	0.809056646	0.824193522	0.833716363	0.834473429	0.854031237	0.872524924	0.876122754	0.924977705
14:53:33.763	0.882551816	0.951381282	0.740517428	0.754308002	0.760897211	0.761360767	0.802410259	0.788168744	0.787163323	0.783625142	0.808729302	0.823778492	0.833270724	0.833974192	0.853410508	0.871686076	0.875274522	0.924118811
14:53:34.714	0.884147053	0.94271484	0.740430789	0.754223362	0.760775583	0.761324104	0.802357292	0.788056003	0.786996809	0.783430123	0.808481898	0.823533141	0.832964152	0.83368517	0.853051682	0.871312828	0.874907305	0.923782075
14:53:35.750	0.881055687	0.940948059	0.740452294	0.754210268	0.760748343	0.761319957	0.802339244	0.788023071	0.786985623	0.783417989	0.808469654	0.823429207	0.833002048	0.83370268	0.853100717	0.871504432	0.875076855	0.924026805
14:53:36.701	0.883185878	0.933168561	0.74037464	0.754137896	0.76070394	0.761204981	0.802280297	0.787948512	0.786937204	0.783362708	0.808460127	0.823444452	0.832962261	0.833650459	0.853096802	0.871529295	0.875099547	0.924035048
14:53:37.651	0.881899017	0.940256904	0.740381241	0.754114992	0.760670984	0.761255504	0.802239802	0.787888018	0.786871048	0.783305148	0.808383115	0.823387539	0.832880599	0.833583449	0.852992568	0.87150485	0.875096056	0.923997371
14:53:38.688	0.878087622	0.948425821	0.740351457	0.754133839	0.760649193	0.761223984	0.802157671	0.787867155	0.786862125	0.783299231	0.808438568	0.823425445	0.832907169	0.833620967	0.853071846	0.871672108	0.875281507	0.924156249
14:53:39.638	0.879590426	0.935689424	0.740275219	0.754038219	0.760641147	0.761169603	0.802148521	0.787843504	0.78682199	0.783223733	0.80842373	0.823323787	0.832819833	0.833563185	0.852980905	0.871576473	0.87525549	0.924112959
14:53:40.589	0.879432473	0.951103652	0.740344322	0.753979857	0.7605834	0.761163585	0.802142804	0.787825891	0.786812495	0.783246262	0.808462523	0.823412586	0.832958135	0.833656423	0.853097549	0.871763187	0.875507291	0.924397642
14:53:41.539	0.876648154	0.948237232	0.740355904	0.753910993	0.760557426	0.761095626	0.802073843	0.787764653	0.786753798	0.78317499	0.80835565	0.823311453	0.83283356	0.83351269	0.852948165	0.871584288	0.875402346	0.924223031
14:53:42.576	0.876351568	0.941064721	0.740201585	0.75389703	0.760517102	0.761078811	0.802053637	0.787808851	0.786806344	0.783265495	0.808479647	0.823544199	0.833055127	0.833736042	0.853327086	0.872124008	0.875968613	0.924904213
14:53:43.526	0.876758085	0.938844034	0.740135726	0.75382541	0.760502575	0.761013384	0.80199482	0.787715385	0.786710866	0.783136454	0.808327341	0.82335541	0.832837403	0.833538446	0.853052217	0.87178511	0.875709392	0.924517794
14:53:44.477	0.878955487	0.945515097	0.740086059	0.753782263	0.76043367	0.760901263	0.801970314	0.787613392	0.786584716	0.782988099	0.808123005	0.823105634	0.832590152	0.833305318	0.85269258	0.871230376	0.875174393	0.923857954
14:53:45.514	0.874201559	0.949419367	0.740032928	0.753755014	0.760364682	0.7609525	0.801911692	0.787608481	0.78659292	0.783015782	0.808192396	0.823166059	0.83273517	0.833407998	0.852906747	0.871536902	0.875526559	0.92429474
14:53:46.464	0.876345759	0.947673998	0.739963241	0.753680709	0.760372284	0.760911625	0.801902028	0.787565549	0.786514909	0.782917869	0.808068475	0.822975238	0.8325133	0.833229457	0.852600389	0.871071654	0.874990158	0.923685849
14:53:47.414	0.878755357	0.943972099	0.740099896	0.753707267	0.76036679	0.760941834	0.801928859	0.787669996	0.78667717	0.783139579	0.808368679	0.823412095	0.832950796	0.833703369	0.853385862	0.872097162	0.875967749	0.924826385
14:53:48.451	0.878232921	0.943655932	0.739979245	0.753590572	0.760338913	0.76083888	0.801902716	0.787601964	0.786600433	0.783023944	0.808200893	0.823223178	0.832703696	0.833503679	0.853037439	0.871534448	0.87547352	0.924253051
14:53:49.402	0.877532187	0.944559814	0.739949686	0.75364298	0.760342755	0.760879825	0.801827488	0.787511265	0.786500655	0.782916808	0.808054534	0.82306792	0.832557945	0.833256821	0.852680586	0.871011603	0.874923576	0.923592758
14:53:50.352	0.878625952	0.948112995	0.739855969	0.753596225	0.760284558	0.760807513	0.801808899	0.787510229	0.786514093	0.782943257	0.808074959	0.823173882	0.832633986	0.833404194	0.852862857	0.871213371	0.875155457	0.923786685
14:53:51.302	0.876583251	0.935279718	0.739875767	0.753528364	0.760221379	0.760770384	0.801862679	0.787513989	0.786515868	0.782958644	0.808175599	0.823224511	0.832783494	0.833479783	0.85295489	0.871324394	0.875336929	0.923954544
14:53:52.339	0.875150972	0.945106252	0.739842095	0.753435859	0.760229947	0.760805985	0.801835193	0.787465528	0.786470266	0.78292848	0.808082915	0.823168973	0.832654554	0.833352065	0.852805457	0.871039397	0.875088825	0.923575136
14:53:53.290	0.877080635	0.946235904	0.739779801	0.753428661	0.760260116	0.760782639	0.80190342	0.787551785	0.786579718	0.78307638	0.808380549	0.823578793	0.833097491	0.833752102	0.853386916	0.871838098	0.875920286	0.924564469
14:53:54.240	0.878977167	0.945581863	0.739825103	0.753429674	0.760171793	0.760757331	0.801789576	0.78750352	0.786518887	0.783003973	0.808301879	0.823437933	0.83295418	0.833607971	0.853179245	0.871446399	0.875528871	0.92409086
14:53:55.277	0.875294415	0.933271449	0.739718905	0.753294191	0.760108506	0.760712648	0.801808125	0.787504942	0.786546974	0.783035408	0.808544752	0.823547863	0.833055626	0.833754841	0.853392207	0.871741654	0.875790556	0.924354617
14:53:56.227	0.875466711	0.936332718	0.739737309	0.753285937	0.760080747	0.760738891	0.801752882	0.787458481	0.786494276	0.783005722	0.808435326	0.823463599	0.832941117	0.833653074	0.853245003	0.871439857	0.875526527	0.92400405
14:53:57.178	0.876305509	0.947331335	0.739583524	0.753350433	0.760053428	0.760642941	0.801665654	0.78739549	0.78640352	0.782880857	0.808213373	0.823269003	0.832728112	0.83348743	0.852932219	0.871002187	0.875152184	0.923512003
14:53:58.214	0.877105281	0.943818035	0.739541587	0.753215279	0.759985578	0.760588281	0.801690241	0.787375381	0.78642886	0.782935303	0.808354748	0.823332381	0.832825423	0.833604179	0.853111482	0.871131033	0.875292273	0.923620279
14:53:59.165	0.877184161	0.94518116	0.739605106	0.753241922	0.760032365	0.760629805	0.801705648	0.7873668	0.786435792	0.782954627	0.808378165	0.823548929	0.832891107	0.833682748	0.853160216	0.871182261	0.875337934	0.923641322
14:54:00.115	0.879805301	0.933968932	0.73970905	0.753169083	0.760003382	0.760528244	0.801764256	0.787385898	0.786456889	0.783003708	0.808519067	0.823551221	0.833058916	0.83378334	0.853326346	0.871478885	0.875547074	0.923882204
14:55:15.802	0.871047385	0.908353483	0.736689868	0.750027776	0.758472221	0.758601225	0.80161714	0.787375074	0.787039208	0.78451573	0.811372605	0.827361694	0.837916688	0.838571224	0.858598223	0.874863056	0.878487382	0.926103682
14:55:16.752	0.869629445	0.931555983	0.736801585	0.750216941	0.75831931	0.758807038	0.801452862	0.787360285	0.786998342	0.784425981	0.81135148	0.82752312	0.837771382	0.838408948	0.858342875	0.874586905	0.878217377	0.925963445
14:55:17.702	0.872481688	0.939955555	0.736760152	0.750189215	0.758416332	0.758839317	0.801515981	0.787410247	0.787091083	0.784503527	0.811493317	0.827699531	0.837933022	0.838616393	0.858614972	0.874983385	0.878587886	0.926398482
14:55:18.739	0.869249053	0.928988733	0.736766373	0.750246353	0.758351362	0.758833654	0.801460189	0.787349132	0.787020016	0.78442805	0.811379898	0.827556421	0.837802981	0.838484471	0.85845949	0.874810535	0.878374433	0.926149223
14:55:19.690	0.867461216	0.931843713	0.736641422	0.750243468	0.75829084	0.758762079	0.801391064	0.787291839	0.786963887	0.784380287	0.811372972	0.827516038	0.837741057	0.838453619	0.858425867	0.874771015	0.878371651	0.92618
14:55:20.640	0.867220917	0.936220639	0.736601008	0.750210344	0.758284722	0.758760412	0.801444229	0.787344016	0.787044718	0.784479793	0.811588642	0.827785881	0.838040285	0.83877508	0.858845109	0.875407563	0.879021207	0.926966744
14:55:21.677	0.865574368	0.925147344	0.736559739	0.750117052	0.758245395	0.758753768	0.80136583	0.787263213	0.786932292	0.78437161	0.811334028	0.82759609	0.837786939	0.838470901	0.858393784	0.874705175	0.878297967	0.925974706
14:55:22.627	0.871580328	0.930596887	0.736655676	0.750166284	0.758246044	0.758701254	0.801490257	0.787312136	0.787007634	0.784463012	0.811527816	0.827708668	0.837942482	0.838674159	0.858656489	0.874989477	0.878597617	0.926296965
14:55:23.578	0.87264757	0.931062429	0.736671405	0.750090622	0.758260496	0.758679943	0.801411091	0.787314611	0.786989485	0.784447246	0.811559012	0.827702837	0.837888918	0.838620944	0.858458637	0.874601614	0.878209024	0.925774468
14:55:24.614	0.866510663	0.935222053	0.736388285	0.750040807	0.758295033	0.75878749	0.801496151	0.787435797	0.787146076	0.784637589	0.811907792	0.828014264	0.83832239	0.839023839	0.859047431	0.875189179	0.878750929	0.92646121
14:55:25.565	0.87053464	0.933039026	0.736638533	0.750086779	0.758243603	0.758750274	0.801545297	0.787462053	0.78721788	0.784700552	0.812059099	0.828099797	0.838390733	0.83914596	0.859138892	0.875105701	0.87861242	0.926337722
14:55:26.515	0.869926042	0.931609982	0.736510795	0.750055743	0.758282764	0.758786808	0.801575272	0.787570843	0.787294632	0.784862148	0.812312723	0.828289589	0.838645012	0.839425143	0.859376362	0.875323169	0.87877447	0.926540798
14:55:27.552	0.868920259	0.932878322	0.736503768	0.750048319	0.758306941	0.758748593	0.801617462	0.787638843	0.787378521	0.784979941	0.812385795	0.828446217	0.838910558	0.839609291	0.859532996	0.875349335	0.878755899	0.926541989
14:55:28.502	0.870038274	0.93108648	0.73651796	0.750007126	0.758291173	0.758769522	0.801711884	0.787698508	0.787458254	0.785086361	0.812472562	0.828468058	0.839014206	0.839753449	0.859542769	0.875256318	0.878557143	0.926301836
14:55:29.453	0.871285672	0.928332571	0.73648139	0.749960138	0.758369062	0.758849491	0.801784538	0.787806533	0.787581432	0.785235806	0.812638533	0.828831749	0.839267241	0.840022864	0.859876757	0.875495014	0.878696851	0.926467833
14:55:30.490	0.868635314	0.927887767	0.73651965	0.749960128	0.758328381	0.758811641	0.801845127	0.787845184	0.787629973	0.785328777	0.812762407	0.828974847	0.839420694	0.840116347	0.859925208	0.875359353	0.87852736	0.926235886
14:55:31.440	0.869362181	0.929221738	0.736516445	0.749961772	0.758351365	0.758790255	0.801900619	0.787971148	0.787753575	0.785451338	0.812921293	0.829178365	0.839738146	0.840361248	0.86027455	0.875704734	0.878863595	0.926607604
14:55:32.390	0.865852708	0.930832035	0.736528098	0.749918113	0.758378049	0.758830965	0.802052406	0.78801318	0.787838702	0.785615633	0.813202298	0.829517393	0.840065591	0.840624574	0.860633608	0.875983234	0.879181978	0.926901918
14:55:33.341	0.867957289	0.929542206	0.736477854	0.749922351	0.75832887	0.758820147	0.802037332	0.78804186	0.78787622	0.78565722	0.813302577	0.829606633	0.840149219	0.840704206	0.860745576	0.875999368	0.879188668	0.926885879
14:55:34.378	0.870817904	0.936953808	0.736358166	0.749852923	0.758330731	0.758783085	0.802025533	0.788053736	0.787950318	0.785729543	0.81343808	0.829716667	0.840351606	0.84088632	0.86084975	0.876156957	0.879410887	0.927127848
14:55:35.328	0.868631246	0.934181593	0.736379126	0.749916518	0.758322091	0.758831564	0.801993607	0.788053002	0.787904381	0.785737667	0.813424291	0.829612968	0.840392546	0.840905012	0.860782662	0.876068647	0.87935203	0.926968841
14:55:36.278	0.870574398	0.931214827	0.7363785	0.749854048	0.758285325	0.75880895	0.801990059	0.788051576	0.787925735	0.785724437	0.813372537	0.829664001	0.840392619	0.84095619	0.860864093	0.876193214	0.879513566	0.927077598
14:55:37.315	0.870220858	0.934166215	0.736309836	0.749829319	0.758278312	0.75883082	0.802003118	0.788086434	0.787933634	0.785754508	0.813447166	0.829778241	0.840525345	0.841077077	0.861103306	0.876571902	0.879972625	0.927534691
14:55:38.266	0.871081557	0.924524878	0.73629126	0.749790868	0.758231148	0.758666161	0.801927255	0.787958387	0.787828581	0.785637018	0.813282517	0.829562911	0.840345668	0.840888914	0.860887514	0.876382454	0.879892517	0.927351217
14:55:39.216	0.870383435	0.923954567	0.736192911	0.749685629	0.758230314	0.758704384	0.801860069	0.787882379	0.787747085	0.785511379	0.81313098	0.829409033	0.840146137	0.840692505	0.860755047	0.876253856	0.879832186	0.927254363
14:55:40.166	0.868685963	0.928073025	0.736324504	0.749627981	0.75814275	0.758617366	0.801735046	0.787761867	0.787636414	0.78537828	0.812944712	0.829185036	0.839982169	0.840540772	0.86056129	0.876215535	0.879836968	0.927240692
14:55:41.203	0.866830225	0.932863111	0.736251633	0.749583779	0.758025805	0.758535642	0.80160021	0.787637477	0.787473065	0.785140962	0.812676474	0.828877417	0.839730473	0.840162049	0.860096516	0.875739028	0.879456245	0.926812897
14:55:42.154	0.865718386	0.921351009	0.736205582	0.749553249	0.757973389	0.758484623	0.801599755	0.787535002	0.787363263	0.785000202	0.812542269	0.828712837	0.839531791	0.840020289	0.860027144	0.875822531	0.879531717	0.926925473
14:55:43.104	0.865686083	0.931034436	0.736084475	0.749433204	0.757975873	0.758440307	0.801440386	0.787376351	0.78717468	0.784779807	0.812227097	0.828377161	0.839116245	0.839628857	0.859551457	0.87529398	0.879049544	0.926435104
14:55:44.141	0.871195399	0.929727087	0.735991987	0.749435776	0.757867078	0.758415622	0.801313257	0.787262982	0.787087478	0.784660495	0.812149005	0.828230193	0.838939539	0.839489816	0.859428349	0.875312628	0.8790358	0.926406361
14:55:45.091	0.868457118	0.935113854	0.735928125	0.749376915	0.757799703	0.758357608	0.801208913	0.787189416	0.786951365	0.784516646	0.811904467	0.828029437	0.838710581	0.839307515	0.859263322	0.875194252	0.878952456	0.926356567
14:55:46.042	0.865910379	0.929171983	0.735890098	0.749358583	0.757763557	0.758245125	0.801198818	0.787109818	0.786847072	0.784422236	0.811824258	0.827924845	0.838647455	0.83916501	0.859145773	0.875140251	0.878887161	0.926316757
14:55:47.078	0.868784968	0.929876967	0.735876043	0.749306918	0.75774831	0.758173702	0.801132782	0.786961327	0.786721611	0.784250912	0.811646868	0.827659926	0.838441164	0.838930978	0.858885234	0.874980639	0.878712443	0.926194117
14:55:48.029	0.870035727	0.924225087	0.735802844	0.749219316	0.757686763	0.758207766	0.801012013	0.786891709	0.786632943	0.784152492	0.811473012	0.82758995	0.838287189	0.838792464	0.858792788	0.874973781	0.87873727	0.926228901
14:55:48.979	0.865691788	0.935085574	0.735833704	0.749144908	0.757649528	0.75813106	0.800913042	0.786782149	0.78651324	0.784000414	0.811259774	0.827333194	0.838026643	0.838565692	0.858521717	0.874691133	0.878464753	0.925926622
14:55:50.016	0.867120344	0.934698284	0.735839045	0.749118864	0.757639122	0.758140301	0.80095696	0.786835366	0.786595905	0.784109401	0.811436019	0.827532919	0.838401849	0.838847432	0.859057835	0.875386979	0.879257361	0.926878492
14:55:50.966	0.866360185	0.924215949	0.735696878	0.749142836	0.757598161	0.758095183	0.800953461	0.786823994	0.78657357	0.784082204	0.811422731	0.827533545	0.838379551	0.83884466	0.858995455	0.87534676	0.879243682	0.926811379
14:55:51.917	0.867529013	0.928270092	0.735778278	0.749064111	0.757629951	0.758144458	0.800909543	0.786796861	0.786521011	0.784041521	0.811294338	0.827407448	0.838183131	0.838689377	0.858754628	0.874913203	0.878872238	0.926260691
14:55:52.867	0.866791412	0.926249913	0.735693079	0.749063845	0.757593792	0.758067848	0.800981419	0.786885375	0.786621632	0.784174976	0.811388347	0.827554273	0.838418568	0.838897565	0.858995355	0.875121971	0.879104335	0.926444177
14:55:53.904	0.864859003	0.927168307	0.735721672	0.749086264	0.757646994	0.758096616	0.801115988	0.786966084	0.786739455	0.784341209	0.811640886	0.827836151	0.838716828	0.839193098	0.85928871	0.875347839	0.87934747	0.926651035
14:55:54.854	0.867564152	0.920954401	0.735666906	0.749068261	0.757655813	0.758164913	0.801230052	0.787108543	0.786899887	0.784564104	0.811920551	0.828224517	0.83906333	0.839576103	0.859665375	0.875638648	0.879628486	0.926839252
14:55:55.805	0.868253233	0.923755108	0.735710824	0.749081999	0.757734446	0.758231085	0.801396795	0.787297962	0.787153839	0.784891957	0.81238697	0.828793798	0.839670941	0.84015177	0.860336066	0.876329867	0.880286479	0.927429206
14:55:56.842	0.866929767	0.927905882	0.735694339	0.749079679	0.757779807	0.758310219	0.801502242	0.78746062	0.787345677	0.785126338	0.812716869	0.829144299	0.840020066	0.840496468	0.860665116	0.8763601	0.880352818	0.927398201
14:55:57.792	0.869749441	0.930880627	0.735649074	0.749081411	0.757824427	0.758289217	0.801647844	0.787627837	0.787529991	0.785366599	0.813096922	0.829632572	0.840414846	0.840952281	0.861128222	0.876697976	0.880722043	0.92773515
14:55:58.742	0.867859796	0.93279262	0.735635501	0.749099788	0.757828547	0.758296982	0.801763383	0.787761805	0.78773994	0.785614735	0.813416465	0.830055414	0.840827306	0.841322931	0.861505864	0.877056366	0.880936252	0.927956502
14:55:59.779	0.868165575	0.923283386	0.735774044	0.749075906	0.757880653	0.758362088	0.801859636	0.787885186	0.787851656	0.785772811	0.813522634	0.830190056	0.841075725	0.841592733	0.861680037	0.877068422	0.880962799	0.9278737
14:57:15.206	0.863655809	0.918468948	0.733928792	0.747216243	0.757172417	0.757521825	0.80244088	0.788553065	0.788555124	0.787080555	0.815877578	0.83286954	0.844097917	0.844608085	0.864646298	0.878322403	0.882636469	0.92859055
14:57:16.157	0.861721813	0.924775686	0.733748401	0.747172895	0.757151266	0.757582693	0.802401496	0.788528101	0.788539597	0.787076747	0.81583444	0.833010173	0.844306806	0.844700087	0.864761669	0.878563191	0.882866699	0.928779848
14:57:17.194	0.858041093	0.929345903	0.73383519	0.747120918	0.757137273	0.757478587	0.802327835	0.788423209	0.788396039	0.786857165	0.815600631	0.832598214	0.84386982	0.844262973	0.864188707	0.877861548	0.88226594	0.927956088
14:57:18.144	0.85581276	0.924088356	0.733829331	0.747125518	0.757120298	0.757567581	0.80226814	0.788390036	0.788365344	0.786807273	0.8154355	0.83256202	0.843853869	0.844225707	0.864198625	0.877999833	0.882418745	0.928139157
14:57:19.094	0.858527142	0.924978855	0.733839945	0.747162667	0.757137241	0.757546089	0.802297445	0.78842176	0.78841675	0.786902212	0.815674051	0.832760975	0.844107093	0.844486019	0.864674347	0.878783509	0.883171846	0.929164911
14:57:20.131	0.861332267	0.918702474	0.733765579	0.747121841	0.757117661	0.757522899	0.80231469	0.788348144	0.788346725	0.7868107	0.815544814	0.832680656	0.843954724	0.844383001	0.86457725	0.878708448	0.883072856	0.929110744
14:57:21.082	0.861910634	0.911560174	0.733781874	0.747060734	0.757051791	0.757441107	0.802149004	0.788212207	0.788185049	0.786601358	0.815242814	0.832210788	0.843575289	0.843975464	0.86398738	0.877966457	0.882297167	0.928242747
14:57:22.032	0.861303613	0.919256537	0.733660286	0.74696572	0.75700456	0.757482041	0.802146829	0.788200596	0.788155016	0.786572739	0.81518947	0.832206014	0.843533113	0.843903825	0.863901777	0.877882305	0.882197369	0.928158364
14:57:23.069	0.860005762	0.925446779	0.733792102	0.747030161	0.757041129	0.757477107	0.802209265	0.78826461	0.788235001	0.786661904	0.815307466	0.832291774	0.843653956	0.844094889	0.864096706	0.878022206	0.882376103	0.928361476
14:57:24.019	0.85967304	0.921679291	0.733720189	0.746955816	0.757014289	0.757467408	0.802178224	0.788226986	0.788177747	0.786582289	0.815186764	0.832155495	0.843424	0.843838086	0.863687385	0.877370156	0.881684396	0.927439763
14:57:24.970	0.859520028	0.917596126	0.733819339	0.746957904	0.757072476	0.757577231	0.802442253	0.788428707	0.788375	0.786870344	0.815643772	0.832598537	0.843914533	0.844413568	0.864375282	0.878199592	0.882553376	0.928434603
14:57:25.920	0.859586606	0.920490986	0.733828041	0.747019901	0.757094449	0.757537257	0.802551036	0.788575998	0.788585574	0.787109574	0.815977404	0.833044504	0.84436268	0.84487098	0.865053523	0.878845911	0.883308596	0.92917196
14:57:26.957	0.858081772	0.918011794	0.733726343	0.747047704	0.757211063	0.757637807	0.802567	0.788688079	0.788703176	0.787269411	0.816181179	0.833414616	0.844636985	0.845159318	0.865301668	0.879044295	0.883516885	0.929298653
14:57:27.907	0.861866727	0.92232517	0.73376911	0.74700626	0.757171406	0.757664052	0.802603051	0.788691262	0.788698503	0.787287483	0.816231567	0.833361175	0.844567823	0.845099261	0.86515094	0.878729678	0.883171783	0.928906901
14:57:28.858	0.861449696	0.920994296	0.733789044	0.747015412	0.757201699	0.757714511	0.802684214	0.788789601	0.788836603	0.787441543	0.816367049	0.833693602	0.844824	0.845366329	0.86542229	0.878987516	0.88345913	0.929109051
14:57:29.894	0.859009632	0.921064279	0.733838899	0.747082741	0.757307059	0.757618665	0.802794191	0.788936746	0.789023432	0.787665874	0.816677169	0.834046879	0.845236538	0.845744182	0.865824844	0.879484216	0.883941478	0.929579972
14:57:30.845	0.860430757	0.925827396	0.733863103	0.74709369	0.757277635	0.757785689	0.802937923	0.789033959	0.789108058	0.787800753	0.816825431	0.834269294	0.845463034	0.845987634	0.866065456	0.879650985	0.884046529	0.92969359
14:57:31.795	0.860893801	0.913020716	0.733820342	0.746977745	0.757297289	0.757677447	0.802863773	0.789039972	0.789110935	0.787807529	0.816810159	0.834239161	0.845467441	0.845971009	0.865927354	0.879230743	0.883609939	0.929162799
14:57:32.832	0.860461147	0.925684697	0.733824382	0.747007859	0.757276508	0.757767379	0.803004033	0.789164931	0.789262061	0.788005873	0.817018451	0.834532204	0.84585372	0.846289827	0.866360495	0.879712018	0.884049585	0.929671677
14:57:33.782	0.860880593	0.920575731	0.733831784	0.747028418	0.757342737	0.757775943	0.803071611	0.78921954	0.789338948	0.788074696	0.817080014	0.834601146	0.845942028	0.846447646	0.866506222	0.879816111	0.884128316	0.929754679
14:57:34.733	0.859271653	0.909887086	0.733744507	0.747080669	0.75741737	0.75782241	0.803111468	0.789323229	0.789441109	0.78822577	0.817343532	0.834810283	0.846176367	0.846733816	0.866906279	0.880348884	0.884713709	0.930285299
14:57:35.683	0.86261683	0.918593356	0.733777084	0.747005526	0.757381413	0.757815723	0.803109119	0.789284266	0.78939418	0.788187596	0.817308936	0.834663321	0.846035211	0.846649107	0.866735088	0.880119512	0.884543181	0.930027549
14:57:36.720	0.856031748	0.920434506	0.73380522	0.746965551	0.757353956	0.757772016	0.803073998	0.789290106	0.789380766	0.788165188	0.81730083	0.834697787	0.846050439	0.84667342	0.866757015	0.880311089	0.884746358	0.930212416
14:57:37.670	0.859552842	0.92278542	0.733855612	0.746985282	0.757343056	0.757779549	0.803139126	0.78927077	0.789340967	0.788130859	0.817318831	0.834686767	0.846000456	0.846624029	0.866782337	0.880394145	0.884899256	0.930358986
14:57:38.621	0.858584375	0.921241691	0.733732564	0.747011229	0.757344559	0.757748107	0.803068409	0.789239039	0.789314469	0.788098352	0.817234544	0.834652653	0.845993723	0.846583857	0.866831048	0.880531794	0.885088563	0.930613697
14:57:39.658	0.859923255	0.919569374	0.733728224	0.746960552	0.757283071	0.757693092	0.80294686	0.789125551	0.789161517	0.78790226	0.816989479	0.834302019	0.845677067	0.846219547	0.866360176	0.880064784	0.884679041	0.930091222
14:57:40.608	0.858073297	0.921920937	0.733775494	0.746861572	0.757213121	0.757655257	0.802902614	0.789022762	0.789087439	0.787794305	0.816843038	0.834242011	0.845546302	0.846091951	0.866270752	0.880008129	0.884765795	0.930162247
14:57:41.558	0.857856067	0.921813357	0.733628123	0.746764026	0.757155444	0.757607891	0.802816999	0.788861239	0.78889929	0.787538849	0.816506042	0.83370305	0.845041089	0.84560486	0.865598905	0.879257713	0.884006876	0.929246238
14:57:42.595	0.859945868	0.914274875	0.733638832	0.74682914	0.757151124	0.757531105	0.802826931	0.788866807	0.788911469	0.78755453	0.816592981	0.833831731	0.845108685	0.84573959	0.865819269	0.879647058	0.884541588	0.929806755
14:57:43.546	0.860619726	0.916230272	0.733582426	0.746818444	0.75712077	0.757510129	0.802735598	0.788797621	0.788792111	0.787460879	0.816449581	0.833680918	0.844954308	0.845590468	0.865675679	0.879571268	0.884525397	0.92979189
14:57:44.496	0.859651006	0.924063934	0.733471077	0.746742782	0.757041213	0.757568139	0.80264002	0.788733652	0.788719429	0.787364637	0.816344968	0.833537242	0.844859445	0.845483728	0.865602277	0.879544714	0.884536846	0.929769873
14:57:45.446	0.859475993	0.916386655	0.733529846	0.746703442	0.75709595	0.75746032	0.802601507	0.788680859	0.78865528	0.787259039	0.81616474	0.833380887	0.844652521	0.845319902	0.865360784	0.8793085	0.884412472	0.929548809
14:57:46.483	0.857933206	0.91894425	0.733522288	0.746649269	0.757007816	0.757427691	0.80251179	0.78856705	0.788514915	0.787078296	0.815970107	0.833101087	0.844346484	0.844952985	0.864892245	0.87875089	0.883853607	0.928899735
14:57:47.434	0.858612701	0.916198574	0.73361471	0.746633453	0.756974139	0.757445887	0.802440426	0.788461125	0.788407857	0.786966538	0.815843347	0.832894573	0.844175516	0.844795772	0.864736964	0.878583504	0.883758765	0.928756662
14:57:48.470	0.859719437	0.91989347	0.733349529	0.74662123	0.756949588	0.757388188	0.802399706	0.788434129	0.78834235	0.786901235	0.815755916	0.832836043	0.844031341	0.844694005	0.86465694	0.878542289	0.883798235	0.928780497
14:57:49.421	0.856150541	0.924304839	0.733458215	0.746544973	0.756909953	0.757306846	0.802336211	0.788341894	0.788252337	0.786792028	0.815653561	0.832680534	0.843969616	0.844580897	0.864561711	0.878526427	0.883833854	0.928810904
14:57:50.371	0.857995364	0.913511536	0.733360909	0.746529051	0.756858868	0.757345958	0.802361871	0.788301534	0.788199962	0.786742748	0.815673393	0.832652865	0.843947131	0.844528312	0.864592106	0.878677172	0.884046267	0.929079563
14:57:51.322	0.858190548	0.921193719	0.733218664	0.746458065	0.756845428	0.757232186	0.802297615	0.788237841	0.78813952	0.786665729	0.815549988	0.832573374	0.843870676	0.844407573	0.864511442	0.878637	0.883993661	0.929019192
14:57:52.358	0.854595485	0.916024824	0.733285495	0.746431286	0.756763541	0.757172289	0.802207705	0.788116179	0.787977646	0.786447708	0.815296733	0.832231937	0.843565239	0.844090842	0.86416007	0.878394781	0.883767287	0.928816309
14:57:53.309	0.857437918	0.921413416	0.733264481	0.74642572	0.756756465	0.757164724	0.802087015	0.78802278	0.787876982	0.786337707	0.815080137	0.832134984	0.843446612	0.844006011	0.864137321	0.878523327	0.883916079	0.929094496
14:57:54.259	0.86307721	0.918043051	0.733341986	0.746341136	0.756720739	0.757055103	0.801909461	0.787856871	0.787656385	0.786059316	0.814783571	0.831733986	0.842981862	0.843519627	0.863583579	0.878000589	0.883405036	0.928562203
14:57:55.296	0.859093789	0.919558663	0.733130427	0.746303499	0.756616879	0.757005483	0.801780761	0.787714887	0.787484083	0.785825942	0.814462887	0.831332444	0.842586937	0.843163222	0.863140928	0.877640843	0.883006092	0.928163043
14:57:56.246	0.855165086	0.918762651	0.733142817	0.746294447	0.756576375	0.756972365	0.801742353	0.787608064	0.787359722	0.785660526	0.814257504	0.831097942	0.842304297	0.842920248	0.862871478	0.877419599	0.882802333	0.927918159
14:57:57.197	0.857779768	0.910653428	0.733035809	0.746259783	0.75655624	0.756940498	0.801670825	0.78750137	0.787242706	0.785531319	0.8140305	0.830875715	0.842091874	0.842730429	0.862660306	0.877176229	0.882682748	0.927836452
14:57:58.147	0.858948218	0.91188114	0.733064531	0.746180526	0.756527613	0.756868394	0.801613978	0.787463166	0.787176222	0.785463748	0.813990216	0.830783149	0.842047024	0.842677865	0.862616298	0.877256634	0.882804868	0.927946544
14:57:59.184	0.856197377	0.91999409	0.732989464	0.746110888	0.75646275	0.756766364	0.801527169	0.787360173	0.787042297	0.785281156	0.813690766	0.830491835	0.841740357	0.842324365	0.86226917	0.876858382	0.882409938	0.927470764
14:58:00.134	0.85621462	0.915354379	0.7329772	0.746055119	0.756418002	0.756779467	0.801484437	0.787279051	0.786979218	0.78521025	0.813753175	0.830483675	0.841693481	0.842264683	0.862215856	0.876946047	0.882556332	0.927703795
14:59:15.994	0.848819186	0.935563261	0.731770286	0.744861377	0.756023341	0.756502755	0.801536846	0.787173565	0.786407067	0.784665227	0.813225235	0.82994089	0.841786588	0.841979141	0.861654913	0.875985862	0.882464743	0.926432691
14:59:17.030	0.854526884	0.909316892	0.73211376	0.745034635	0.756170014	0.756563329	0.801767692	0.787343263	0.786760066	0.7851132	0.81364513	0.830846579	0.842436914	0.842804326	0.862641123	0.877070809	0.883381988	0.927538835
14:59:17.981	0.855103383	0.915554241	0.732318566	0.74518082	0.756406321	0.756758615	0.802184726	0.787744397	0.787209256	0.78565372	0.814358923	0.831733662	0.843152083	0.843621627	0.86347495	0.877634027	0.883924458	0.928056866
14:59:18.931	0.85415665	0.909734438	0.73227752	0.745199739	0.756451689	0.756856445	0.802294391	0.787955877	0.787455887	0.785945343	0.814805716	0.832077322	0.84353677	0.844046497	0.863894279	0.877757297	0.884060026	0.928060429
14:59:19.968	0.851890939	0.910177329	0.732396694	0.745230315	0.756558013	0.756929343	0.802596146	0.788254335	0.787783574	0.786370592	0.81534139	0.832574411	0.844281098	0.844699334	0.864556844	0.878332658	0.884588865	0.928529357
14:59:20.918	0.850014844	0.90839521	0.732226681	0.745347783	0.756660397	0.7570607	0.802844528	0.788546179	0.788125617	0.786804489	0.815979309	0.833287306	0.84497703	0.84543498	0.865311764	0.878835993	0.885028194	0.928905553
14:59:21.869	0.853043763	0.908582976	0.732439186	0.7453928	0.756870119	0.757197998	0.803157352	0.78894432	0.788574791	0.78739468	0.816730312	0.834261913	0.845998646	0.846401187	0.866444104	0.879901444	0.886086127	0.930099831
14:59:22.906	0.854407518	0.915988768	0.732504944	0.745454972	0.756922354	0.757336434	0.80339202	0.78924397	0.78890077	0.787792098	0.817266041	0.834775674	0.846452128	0.847024656	0.867073505	0.880188272	0.886342056	0.930210991
14:59:23.856	0.854664303	0.910676129	0.732684996	0.745541956	0.757021072	0.757416852	0.803608941	0.789458794	0.789173851	0.788135669	0.817637538	0.835225427	0.846959249	0.847501906	0.867484402	0.8803795	0.886430615	0.930184081
14:59:24.806	0.85113145	0.913465972	0.732794992	0.745576884	0.757190086	0.757508118	0.803813257	0.789767985	0.789484699	0.788534224	0.818153348	0.835697406	0.8475838	0.848095083	0.868023896	0.880657951	0.88665724	0.930336741
14:59:25.757	0.853756103	0.917839589	0.732649997	0.745600903	0.75726414	0.757657886	0.804017934	0.790049464	0.789797569	0.788917944	0.81857838	0.836203126	0.848011444	0.848654039	0.868458398	0.880986553	0.886842597	0.930431242
14:59:26.794	0.851468385	0.912305142	0.732830357	0.745671776	0.757352554	0.757756703	0.804275473	0.79028367	0.790076301	0.789313766	0.819088118	0.836893368	0.84874368	0.849314675	0.869196684	0.88154531	0.887406762	0.930965991
14:59:27.744	0.850658887	0.910098804	0.73269601	0.745711341	0.757459876	0.757894321	0.804566045	0.790579044	0.79040337	0.789709816	0.819650529	0.837536818	0.849508763	0.849972423	0.870041368	0.88228696	0.888121104	0.931675689
14:59:28.694	0.852961186	0.908146695	0.73276431	0.7457329	0.757580562	0.757910964	0.804710492	0.790748138	0.790637053	0.789993334	0.819946712	0.837995977	0.849818305	0.850416248	0.870387588	0.88253923	0.888398779	0.931927366
14:59:29.731	0.853650914	0.913038309	0.732792281	0.745793719	0.757571967	0.758060028	0.804804098	0.790880213	0.790782561	0.790179131	0.820229807	0.838194332	0.850125796	0.850722822	0.870759535	0.882796527	0.888605589	0.932067851
14:59:30.682	0.852212663	0.913049029	0.732833905	0.745804294	0.757622908	0.758080942	0.804859235	0.790967194	0.79084435	0.790251523	0.820265011	0.838304179	0.850189809	0.850797003	0.870753187	0.882666011	0.888498391	0.931879942
14:59:31.632	0.849763569	0.910954474	0.732797678	0.745800507	0.757574815	0.757960084	0.804894448	0.790953903	0.790852392	0.790255039	0.820218543	0.838303544	0.850117968	0.850724197	0.870676156	0.882457153	0.888259031	0.931606925
14:59:32.582	0.853663754	0.905555844	0.732740711	0.745770376	0.757656736	0.758010091	0.804938582	0.791030899	0.790917132	0.790354295	0.820405083	0.838418759	0.850382004	0.850897639	0.870877287	0.882654685	0.888548578	0.931807937
14:59:33.619	0.853356012	0.911721292	0.732813714	0.745732367	0.757697093	0.758087249	0.805014326	0.791136387	0.790988188	0.790456876	0.820529829	0.838567825	0.850541079	0.85108854	0.871183489	0.882941163	0.888875544	0.932131186
14:59:34.570	0.852157549	0.904562027	0.732804099	0.745809553	0.757655128	0.758124401	0.805050645	0.791092683	0.790937532	0.79039585	0.820451873	0.838464954	0.850413305	0.851008087	0.870966352	0.882635516	0.888571629	0.931749262
14:59:35.520	0.852370391	0.90527837	0.732775737	0.74580829	0.757689421	0.758080731	0.805031596	0.791097727	0.790942674	0.790398181	0.820473486	0.838484282	0.850429261	0.851063953	0.871020043	0.882656011	0.888584822	0.931787442
14:59:36.557	0.853058103	0.911250687	0.732847615	0.745801036	0.757718562	0.758057881	0.805065827	0.791136722	0.790945392	0.790414576	0.820498146	0.838494903	0.850436726	0.851137363	0.871095127	0.882754979	0.888694942	0.931872825
14:59:37.507	0.853453193	0.909649632	0.732816393	0.745771408	0.757724396	0.758134076	0.805088404	0.791201329	0.791068069	0.790559824	0.820775699	0.838859437	0.850780442	0.851441759	0.871509606	0.883438376	0.889316569	0.932588872
14:59:38.458	0.853699398	0.916830851	0.73285117	0.745806471	0.757782408	0.758149332	0.805128272	0.791229198	0.791106745	0.790585972	0.820760112	0.83887401	0.850815194	0.851430894	0.871509169	0.883321096	0.889311177	0.932537325
14:59:39.494	0.853961356	0.913833773	0.732756145	0.745840105	0.757762967	0.75813412	0.805079013	0.791195472	0.791059254	0.790540372	0.82067464	0.838699732	0.850732296	0.85134062	0.871273816	0.882955845	0.888925439	0.932055908
14:59:40.445	0.8516406	0.907853455	0.732890041	0.745907734	0.757755486	0.75819177	0.805172938	0.791258701	0.791129197	0.790641525	0.82083278	0.839025047	0.850944287	0.851585093	0.871581694	0.883260403	0.889287284	0.932404308
14:59:41.395	0.851851235	0.905022279	0.732871254	0.745789655	0.757786573	0.758145172	0.805176528	0.791248638	0.791125194	0.79060519	0.82073257	0.838975152	0.850923291	0.851444353	0.871351182	0.88289556	0.88888625	0.931939059
14:59:42.346	0.850090749	0.911385709	0.732778188	0.745744674	0.757814724	0.758226918	0.8052131	0.791341599	0.791229338	0.790729062	0.820957089	0.8391971	0.851213373	0.851729588	0.871779889	0.883335868	0.889312633	0.932408216
14:59:43.382	0.854523348	0.904743815	0.732842022	0.745754762	0.757782829	0.758132043	0.805231366	0.791275404	0.791144491	0.790651209	0.820793185	0.839109385	0.851032688	0.851529251	0.871494604	0.882862418	0.888878881	0.931890057
14:59:44.333	0.852762247	0.913035116	0.732777648	0.745817856	0.757777855	0.758087387	0.805175333	0.791268358	0.791101854	0.790607791	0.820803074	0.839035298	0.850991578	0.851489849	0.871421178	0.882808307	0.88883607	0.931823084
14:59:45.370	0.853737375	0.909874945	0.732652667	0.745781376	0.757759295	0.758119939	0.805173347	0.791245709	0.791076396	0.790578253	0.820799018	0.839015091	0.850953096	0.851470222	0.871513834	0.883082697	0.889153012	0.932197169
14:59:46.320	0.851027449	0.91324202	0.732666367	0.745749118	0.75767443	0.758045284	0.805012736	0.791068915	0.790852416	0.790299932	0.820399094	0.838568116	0.850454267	0.851003221	0.870889758	0.882479238	0.888546154	0.931523447
14:59:47.270	0.849584204	0.908688019	0.732707588	0.74568762	0.757672239	0.75791804	0.804864494	0.790948192	0.790692423	0.790110199	0.820110663	0.83824092	0.850188593	0.850715572	0.870605749	0.882290745	0.888526994	0.931481296
14:59:48.221	0.851278265	0.909582758	0.732676483	0.745638231	0.757597317	0.757928816	0.804759148	0.790780462	0.790504686	0.789886163	0.819817785	0.837913194	0.849891977	0.850412471	0.870314286	0.882216914	0.888532421	0.931461174
14:59:49.258	0.852091508	0.905136703	0.732644804	0.745558925	0.757504063	0.757929265	0.804559537	0.790488237	0.790211537	0.789497369	0.819314803	0.837326432	0.849174038	0.849789259	0.869628669	0.881553562	0.887958526	0.93082808
14:59:50.208	0.850229207	0.909005699	0.732717863	0.745470263	0.75739038	0.757842314	0.804372513	0.790304082	0.789951693	0.789182774	0.818943189	0.836871439	0.848742305	0.849317434	0.869179805	0.881312561	0.887766628	0.930632084
14:59:51.158	0.853302627	0.913119013	0.732587085	0.745423648	0.7572736	0.757743771	0.80419929	0.790115118	0.789711936	0.788900011	0.818588854	0.83633442	0.848307886	0.848918965	0.868774946	0.881028412	0.887561012	0.930412354
14:59:52.195	0.851612374	0.909917966	0.732403689	0.745341429	0.757198123	0.757617374	0.804086322	0.789908961	0.789488088	0.788647241	0.818280193	0.835936422	0.847833045	0.848542419	0.868436015	0.88081833	0.88742613	0.930302947
14:59:53.146	0.85216363	0.912306238	0.732496685	0.745259318	0.757140771	0.757477859	0.803890606	0.789719388	0.789257517	0.78834379	0.817919332	0.835597316	0.847450533	0.848109311	0.867979039	0.880505712	0.887189414	0.930064027
14:59:54.096	0.852308065	0.906994798	0.732534516	0.745221534	0.757047535	0.757400858	0.803759566	0.789515211	0.789049225	0.788096416	0.817656636	0.835212961	0.847046493	0.847704499	0.867598431	0.880085729	0.886837983	0.929703172
14:59:55.046	0.850037789	0.909532078	0.732482326	0.745173599	0.757041446	0.757394139	0.80364992	0.789399381	0.788882012	0.787881816	0.817356838	0.834895025	0.846742837	0.847407985	0.867222901	0.879889322	0.886595768	0.929534564
14:59:56.083	0.851219263	0.909542185	0.732384578	0.745152174	0.756932541	0.75738898	0.803587339	0.789286823	0.788745186	0.787722175	0.817136369	0.834643921	0.846559702	0.847157548	0.866941306	0.879609393	0.886346666	0.929290183
14:59:57.034	0.850503051	0.909870141	0.732330976	0.745112374	0.756962533	0.757297709	0.803504846	0.78920967	0.788690796	0.787635628	0.816968488	0.834444631	0.846414102	0.847005098	0.86678705	0.879527927	0.886235993	0.929177313
14:59:57.984	0.851950682	0.908706235	0.732436266	0.745149229	0.756922703	0.75733282	0.803506028	0.789191682	0.78865209	0.787577357	0.81690026	0.834406928	0.846258164	0.846885439	0.866698942	0.879410284	0.886099613	0.929090226
14:59:59.021	0.851861669	0.903538485	0.732313014	0.745150387	0.756947706	0.757259933	0.803501607	0.789190899	0.788642495	0.78756228	0.816822471	0.834394444	0.846224413	0.84687446	0.866638833	0.879291731	0.885949023	0.928939355
14:59:59.971	0.850902664	0.909631271	0.732328221	0.745180515	0.756942112	0.757327169	0.803484175	0.78922176	0.788653673	0.787611724	0.816932739	0.834401411	0.84626576	0.846917726	0.866647117	0.879291719	0.88596111	0.928897727
15:01:15.398	0.847431148	0.898595825	0.731786284	0.744703612	0.756952148	0.7568961	0.802956536	0.788175527	0.787075592	0.785698643	0.814644724	0.832352232	0.844508749	0.844715249	0.86439515	0.877739297	0.888110364	0.927965765
15:01:16.435	0.848225695	0.90177673	0.732195491	0.744712465	0.756895553	0.757171364	0.803090742	0.788273419	0.787201518	0.785862653	0.814965928	0.832555019	0.844536224	0.844946839	0.864642141	0.877889543	0.888148531	0.927881245
15:01:17.386	0.847185114	0.90622234	0.732266943	0.744802134	0.757038965	0.757314644	0.803320138	0.788541049	0.787516459	0.786210603	0.815356647	0.832907062	0.845006713	0.845423829	0.865099446	0.878190839	0.888554904	0.928056826
15:01:18.336	0.847608035	0.900623714	0.73226578	0.744788268	0.757054357	0.757405122	0.803447317	0.788656022	0.787638373	0.786384936	0.815540165	0.833112341	0.845306253	0.8456879	0.865478398	0.878548439	0.888910808	0.928388694
15:01:19.373	0.845473856	0.899796641	0.73235037	0.744876129	0.757117062	0.757453664	0.803487058	0.78874209	0.78774146	0.786509716	0.815696208	0.833332655	0.845391958	0.845903332	0.865722452	0.878681707	0.88907683	0.928529254
15:01:20.323	0.845928697	0.900108824	0.732521571	0.744934025	0.757196393	0.757509794	0.803609908	0.788911561	0.787893975	0.786693143	0.815903009	0.833595322	0.845714925	0.846214413	0.866106578	0.879094351	0.889549624	0.928942917
15:01:21.274	0.845712162	0.905566319	0.732472821	0.744900158	0.757191394	0.757523129	0.803689483	0.78895828	0.787928962	0.786734902	0.815938873	0.833646835	0.845763675	0.846267955	0.86612133	0.878963989	0.889516359	0.928858803
15:01:22.310	0.849189875	0.900331974	0.732417641	0.744894534	0.757260864	0.75757915	0.803756479	0.788990637	0.788011775	0.786810136	0.816075139	0.833817414	0.845893273	0.846402129	0.866186195	0.879005881	0.889650752	0.928873933
15:01:23.261	0.846494517	0.902812131	0.732442958	0.744931341	0.757308359	0.75763548	0.80378899	0.789076431	0.788071931	0.78693285	0.816169551	0.833992921	0.846060455	0.846535648	0.866317429	0.879121902	0.889827552	0.929030308
15:01:24.211	0.8457276	0.900213903	0.732428272	0.744980743	0.75735222	0.757677119	0.8038504	0.789143884	0.788138925	0.786979135	0.816343386	0.834043377	0.846116431	0.846621459	0.866367035	0.87912567	0.889846502	0.928978581
15:01:25.248	0.848731661	0.901735204	0.732518947	0.744948162	0.757350664	0.757654858	0.803900638	0.789162893	0.788178149	0.787038611	0.816411514	0.834201462	0.846169015	0.846713035	0.866428451	0.87913487	0.889907285	0.928956408
15:01:26.198	0.845633081	0.902188171	0.732487943	0.744986518	0.757402193	0.757738431	0.804021373	0.789234136	0.788279841	0.787176012	0.816554082	0.834408094	0.846373327	0.846895177	0.866666236	0.87947202	0.890283676	0.929319074
15:01:27.149	0.848188599	0.907952513	0.732451504	0.744966893	0.757401847	0.757750725	0.804006753	0.789248954	0.788270375	0.787158279	0.816516636	0.834386975	0.846310587	0.846843218	0.866539493	0.879280203	0.890099089	0.929034238
15:01:28.099	0.847451408	0.897128562	0.732349044	0.745006946	0.757463137	0.757782805	0.803994324	0.789271404	0.78826986	0.787159928	0.816512898	0.83429213	0.846268939	0.846808516	0.866454492	0.879070593	0.889990336	0.928845987
15:01:29.136	0.846578629	0.906343671	0.732533281	0.74505433	0.757521345	0.757763455	0.804057544	0.789323122	0.788318706	0.787213644	0.81656266	0.834431604	0.846430834	0.84692104	0.86658963	0.879269604	0.890286552	0.929079143
15:01:30.086	0.8458351	0.908727084	0.732448023	0.745095353	0.757492617	0.757807131	0.804089428	0.789346842	0.788341688	0.787239889	0.816596053	0.834426486	0.846431475	0.84690501	0.866577268	0.879219005	0.890301171	0.929017965
15:01:31.037	0.844437659	0.898554855	0.732457278	0.745061125	0.757529566	0.757878119	0.804124026	0.789359622	0.788360739	0.787255801	0.816571889	0.834456394	0.846441989	0.846935311	0.866599851	0.87918967	0.890326166	0.929043401
15:01:32.074	0.845189782	0.898912398	0.732595393	0.745111787	0.757549098	0.757768827	0.804133201	0.789369732	0.788363011	0.787266976	0.816614079	0.834436419	0.846505142	0.846933575	0.866622265	0.879235329	0.89043527	0.929086032
15:01:33.024	0.847442112	0.905215463	0.73262112	0.745133649	0.757566384	0.757896148	0.804255746	0.789479974	0.788488838	0.787412732	0.816784791	0.83466379	0.846866797	0.847283051	0.867111274	0.879907996	0.891162403	0.929993021
15:01:33.974	0.8474958	0.903925767	0.732661952	0.74516832	0.757604117	0.757853623	0.8042293	0.789446219	0.788450959	0.787351396	0.816727438	0.83454329	0.846727876	0.847134959	0.866911795	0.879605802	0.890853998	0.929619068
15:01:35.011	0.845331898	0.896211013	0.732689148	0.745107226	0.757598461	0.75784932	0.80423273	0.789455347	0.788421159	0.787293476	0.816623606	0.834452253	0.84663209	0.847037766	0.866761659	0.879463504	0.890770464	0.929416915
15:01:35.962	0.845048804	0.896513822	0.732725422	0.745124924	0.757640903	0.757938989	0.80424227	0.789446916	0.788427485	0.787328457	0.816594226	0.834404026	0.846610701	0.847026032	0.866771662	0.879553441	0.890919093	0.929545949
15:01:36.912	0.844498058	0.900354592	0.732662341	0.745147722	0.75763398	0.757877806	0.804272304	0.789494551	0.788442338	0.787349254	0.816585223	0.834425936	0.846668541	0.847113433	0.866860561	0.879783953	0.891249133	0.929829521
15:01:37.862	0.845995548	0.906353803	0.732643159	0.745149952	0.75762996	0.757870553	0.804219141	0.78942786	0.788388323	0.787249231	0.816527627	0.834303295	0.846473472	0.846903849	0.866607699	0.879439959	0.890998441	0.929433771
15:01:38.899	0.845517876	0.902983843	0.732609755	0.745141674	0.757653091	0.757941919	0.804201238	0.789382828	0.788338136	0.787179173	0.816408113	0.834114565	0.846360504	0.846788349	0.866474898	0.879377359	0.890953343	0.929361046
15:01:39.850	0.843922374	0.898626293	0.732686216	0.745147072	0.757653154	0.757876976	0.804194791	0.789394561	0.788330821	0.787184905	0.816457251	0.834147396	0.846362501	0.846833138	0.866532173	0.879561614	0.891225319	0.929585395
15:01:40.800	0.844154837	0.905607368	0.73270032	0.745126131	0.757653291	0.757956513	0.804244488	0.789380467	0.788308557	0.787157213	0.816412931	0.834155113	0.846325341	0.846793948	0.866484755	0.879518215	0.891263374	0.929553703
15:01:41.837	0.84251495	0.906132147	0.732627445	0.745166149	0.757647311	0.757873677	0.804181161	0.789317072	0.788232269	0.787048967	0.816252731	0.833916587	0.846158255	0.846612801	0.866252859	0.87920987	0.890969295	0.929237869
15:01:42.787	0.845902134	0.899183627	0.732621936	0.745118365	0.757595816	0.757929188	0.804197595	0.789287223	0.788188948	0.786971521	0.816192899	0.833860018	0.846011821	0.846503815	0.866142594	0.879104914	0.890955577	0.929113543
15:01:43.738	0.846735066	0.912280842	0.73262025	0.745107806	0.75760901	0.757874494	0.804056439	0.789205255	0.788116749	0.786872722	0.816068137	0.833642917	0.845816699	0.846324362	0.865971485	0.878942258	0.890797399	0.928954034
15:01:44.774	0.84485448	0.899749358	0.732756358	0.745139687	0.757599426	0.757891962	0.804113966	0.789174047	0.788074819	0.78686528	0.816125109	0.833773344	0.845856201	0.846362211	0.86610321	0.879114535	0.891069736	0.929218897
15:01:45.725	0.843771831	0.907605742	0.732796052	0.745081437	0.757561099	0.7578926	0.803995292	0.789081067	0.787960804	0.78671213	0.815873945	0.833429795	0.84560041	0.846090539	0.865771102	0.878851041	0.8907694	0.928916503
15:01:46.675	0.845228591	0.899101104	0.732609255	0.745138782	0.757515182	0.757829285	0.803913389	0.788981986	0.787813857	0.786542901	0.815526458	0.833215254	0.84538947	0.845857935	0.865491477	0.878621799	0.890566276	0.928736631
15:01:47.626	0.846442051	0.905466626	0.73262411	0.745143363	0.7575155	0.757811016	0.803912124	0.788915846	0.787721049	0.786422328	0.815433979	0.833036347	0.845181958	0.845673585	0.865334222	0.878548598	0.890539298	0.928686744
15:01:48.662	0.844444463	0.904008759	0.732669492	0.745064208	0.75748939	0.757777783	0.803866371	0.788826955	0.787636254	0.786301918	0.815331197	0.832854481	0.845034434	0.845529033	0.865152875	0.878375167	0.890454864	0.928566862
15:01:49.613	0.845079512	0.898903674	0.732558763	0.745050378	0.757412947	0.757727287	0.803736389	0.788721634	0.787516128	0.786136492	0.815092165	0.832587345	0.844717853	0.845242791	0.86478016	0.878009999	0.890112276	0.928146659
15:01:50.563	0.843838373	0.901509506	0.732640918	0.745042848	0.757464357	0.757759368	0.803693476	0.788683751	0.787467409	0.786065493	0.815086599	0.832540467	0.844642585	0.84515648	0.864744174	0.8779706	0.890145041	0.928196316
15:01:51.600	0.845939222	0.903679419	0.732574332	0.744932001	0.757387124	0.757671582	0.803525617	0.788522143	0.787262057	0.785811929	0.8146985	0.832126117	0.844225633	0.844699654	0.864123632	0.877301483	0.889379491	0.927418531
15:01:52.550	0.847539589	0.906831114	0.732765548	0.745005119	0.7574463	0.757700781	0.803600424	0.788552514	0.787304724	0.785883933	0.814844445	0.832260079	0.844356767	0.844884606	0.864524469	0.877838648	0.889953871	0.92808005
15:01:53.501	0.847848362	0.898991291	0.732712656	0.744931328	0.757392491	0.757645615	0.803504006	0.788464318	0.787178246	0.785723031	0.814579925	0.832059472	0.844177542	0.844670063	0.864184445	0.877549158	0.889644574	0.927785478
15:01:54.538	0.847562926	0.903358951	0.732627423	0.744935077	0.75736098	0.757584486	0.803474286	0.788370927	0.787075574	0.785587197	0.81442667	0.831768115	0.843906163	0.844414881	0.863878787	0.877236363	0.889346869	0.927385928
15:01:55.488	0.848049245	0.901438939	0.732597232	0.74493488	0.757361008	0.757596841	0.803435582	0.788301611	0.786987917	0.785500438	0.814321628	0.831690058	0.843775905	0.844262538	0.863767589	0.877134238	0.889362732	0.927343007
15:01:56.438	0.847220322	0.901083606	0.732685361	0.744971891	0.757359914	0.757677764	0.803395931	0.78828364	0.786988055	0.785490412	0.814355989	0.831717504	0.8438008	0.844298077	0.863897683	0.877309961	0.889666122	0.927692558
15:01:57.389	0.843914568	0.901365981	0.732555713	0.745018467	0.757343828	0.757585454	0.80339796	0.788262135	0.786930582	0.785406227	0.814221495	0.831640955	0.843634618	0.844165395	0.863748731	0.877168311	0.889452352	0.927476744
15:01:58.426	0.844936237	0.897467073	0.732806173	0.745021411	0.75737491	0.757700413	0.803478096	0.78835323	0.787028781	0.785533848	0.814488707	0.831947296	0.84393307	0.844484127	0.864221627	0.878003477	0.890159914	0.928272612
15:01:59.376	0.846642052	0.906245205	0.732588918	0.745015902	0.757371835	0.757595455	0.803422778	0.788265593	0.786916023	0.78540283	0.814266362	0.8317016	0.843646532	0.844210462	0.863821428	0.877348089	0.889577268	0.927647441
15:02:00.326	0.844014078	0.904195217	0.732705111	0.745007791	0.757363304	0.757644508	0.803378513	0.788208624	0.786872454	0.78533223	0.81428595	0.831556018	0.843509817	0.844046312	0.863573633	0.876862094	0.88921235	0.927116478
15:03:16.013	0.850045427	0.893900937	0.7347627	0.746660603	0.759539501	0.759766386	0.806085958	0.790579883	0.78887799	0.787508077	0.816641293	0.834456196	0.846466565	0.847035008	0.866273307	0.879216637	0.893110723	0.929078076
15:03:17.050	0.843547565	0.898729882	0.734498817	0.746599376	0.759548025	0.75984736	0.806011569	0.790532026	0.788859198	0.787424736	0.816531492	0.834338577	0.846505911	0.846966273	0.866365618	0.879089089	0.893055962	0.929001811
15:03:18.000	0.844797671	0.899287524	0.734682399	0.746660717	0.759670023	0.759990324	0.806057378	0.790549228	0.788901115	0.787428776	0.816474177	0.834236648	0.846416051	0.846875666	0.866165237	0.878788273	0.892789652	0.928687092
15:03:18.950	0.84508277	0.900247575	0.734682894	0.74679365	0.759735573	0.760072068	0.806153823	0.790668774	0.789047009	0.787605218	0.81678739	0.834487403	0.846724126	0.847253664	0.866730623	0.879501251	0.893453023	0.929453029
15:03:19.987	0.845659771	0.896096767	0.73464551	0.746763207	0.759769505	0.760046905	0.806277449	0.790805014	0.789167588	0.787752677	0.817059786	0.834703686	0.846978935	0.847545431	0.867106354	0.87999113	0.893902294	0.929944018
15:03:20.938	0.845097899	0.896486175	0.734777755	0.746872626	0.759846678	0.760092181	0.806323151	0.790830939	0.789216446	0.787778132	0.817002058	0.834715328	0.847024057	0.847572667	0.867065401	0.87994178	0.893827625	0.92981736
15:03:21.888	0.843715299	0.892529811	0.734746503	0.746916803	0.759849389	0.760171641	0.806318269	0.790834795	0.789201011	0.787777389	0.81698946	0.834665559	0.846951295	0.847458128	0.866845711	0.879456914	0.893398247	0.929302949
15:03:22.838	0.84510119	0.898005541	0.734796051	0.746902499	0.759968927	0.76021391	0.806510493	0.791035089	0.789425747	0.788071264	0.817407207	0.835193746	0.847535564	0.848014582	0.86754128	0.880247639	0.894153732	0.930117587
15:03:23.875	0.846241811	0.894278886	0.734969313	0.746995018	0.760054968	0.760273672	0.806649677	0.791212913	0.789638798	0.78832797	0.817725586	0.835640991	0.847966132	0.848415119	0.867967182	0.88074302	0.89454832	0.930565952
15:03:24.826	0.843114173	0.901187095	0.73494987	0.747053021	0.760085242	0.760344762	0.806712849	0.791244692	0.789681419	0.788331816	0.817692393	0.835598054	0.847934946	0.848317565	0.867679217	0.880088631	0.893920787	0.929710322
15:03:25.776	0.843762485	0.896253568	0.734945542	0.747138544	0.76011915	0.760388644	0.806805369	0.79136907	0.789791174	0.788497522	0.817879478	0.835844413	0.84799827	0.848467505	0.867765628	0.879882999	0.893756932	0.929380403
15:03:26.813	0.843877502	0.89519419	0.735039126	0.747182965	0.760254106	0.76050257	0.806971503	0.791574899	0.790029052	0.788783463	0.818303999	0.836373047	0.848514697	0.848947826	0.868334616	0.880520784	0.894311229	0.930017054
15:03:27.763	0.844979787	0.900236894	0.735002385	0.747139394	0.760307001	0.760538174	0.807102799	0.791689606	0.790166756	0.788931882	0.818469978	0.836465887	0.848670439	0.849131452	0.86851657	0.880574984	0.894347983	0.929995718
15:03:28.714	0.842418212	0.892707699	0.735096328	0.747221432	0.760315686	0.760654939	0.807157461	0.791777229	0.790247417	0.789028571	0.818557202	0.836534834	0.848743121	0.849239715	0.868616841	0.880569911	0.894335227	0.929964569
15:03:29.750	0.847097498	0.903848073	0.735206032	0.747287881	0.760389546	0.760663016	0.807283378	0.791953712	0.790411175	0.789244812	0.818766782	0.836893755	0.849126675	0.849599421	0.869042937	0.881072833	0.894900163	0.930628086
15:03:30.701	0.841937399	0.89930591	0.735186075	0.747361039	0.760468663	0.76070797	0.807339281	0.791976134	0.790473711	0.789288026	0.818832679	0.836871249	0.849141248	0.849650557	0.869028438	0.881032225	0.894936627	0.930592019
15:03:31.651	0.841746698	0.894666251	0.735082653	0.747332871	0.760464476	0.760737076	0.80735141	0.791976943	0.790451674	0.78927924	0.818774148	0.836863282	0.84908937	0.849581481	0.868922738	0.880876787	0.894827979	0.930395236
15:03:32.602	0.844280204	0.890537671	0.735140248	0.747299891	0.76045766	0.760791513	0.807382251	0.79198743	0.790477752	0.789290518	0.818750816	0.836882379	0.849129094	0.84963386	0.868966301	0.880944339	0.894929484	0.930474963
15:03:33.638	0.844277739	0.898919227	0.735139941	0.747310461	0.760502874	0.760752445	0.807395077	0.791974073	0.790462928	0.789258166	0.818751313	0.836833269	0.849056673	0.849581055	0.868873118	0.880816957	0.894887692	0.930402207
15:03:34.589	0.843485731	0.901918092	0.735112045	0.747290544	0.760424317	0.76074592	0.807240896	0.791819253	0.790295277	0.789036169	0.81845157	0.836382331	0.848563037	0.849122561	0.868241577	0.87992237	0.893923025	0.929243407
15:03:35.539	0.842337188	0.898373646	0.73526937	0.74735546	0.760491495	0.760779736	0.807312511	0.791942074	0.790435143	0.789237873	0.818760138	0.83674991	0.848911004	0.849544174	0.868827621	0.880762302	0.89478097	0.930268939
15:03:36.576	0.846452646	0.894689851	0.735264496	0.747290197	0.760490987	0.760716497	0.807345403	0.791956324	0.790417411	0.789237674	0.818736285	0.836702184	0.848901938	0.849537215	0.868821741	0.880748651	0.894814467	0.930232799
15:03:37.526	0.843758806	0.892494538	0.735441024	0.747378726	0.760457948	0.76081954	0.807310899	0.791918256	0.790385219	0.789141275	0.818655503	0.836549743	0.848803316	0.849389751	0.868700857	0.88063605	0.89478989	0.9301284
15:03:38.477	0.841185272	0.898892874	0.735148957	0.747406701	0.760460127	0.760626941	0.807238502	0.791848511	0.790334734	0.789094458	0.818667008	0.836539545	0.848714831	0.849338946	0.868632527	0.880615346	0.894796343	0.930155914
15:03:39.514	0.842815385	0.898846505	0.735150691	0.747359505	0.760426667	0.760683601	0.807176417	0.791795307	0.790262421	0.78899055	0.818481535	0.836371441	0.848614469	0.849161703	0.868444381	0.880461649	0.89470423	0.930021379
15:03:40.464	0.844165104	0.896289758	0.735171125	0.747321008	0.760475452	0.76070425	0.807190794	0.791780106	0.790228687	0.788959002	0.818367724	0.836276686	0.848577256	0.849112488	0.86841262	0.880377449	0.894726067	0.930024556
15:03:41.414	0.843300674	0.89436482	0.735284815	0.747360197	0.760436607	0.760790936	0.807169922	0.791718808	0.790184738	0.788885241	0.8183347	0.836244936	0.848396478	0.848991758	0.868309599	0.88026976	0.894630906	0.929851514
15:03:42.365	0.842085917	0.898819107	0.735171675	0.74738243	0.760491337	0.760790113	0.807245325	0.791798507	0.790263262	0.788996824	0.818550636	0.83646394	0.848652427	0.849213409	0.868590619	0.880561209	0.895031568	0.930298682
15:03:43.402	0.842750328	0.899122501	0.735257399	0.747458628	0.760538923	0.760778028	0.807244361	0.791848539	0.790322566	0.78907231	0.818648227	0.83652244	0.848755591	0.84930465	0.868725922	0.880586966	0.895054259	0.93026581
15:03:44.352	0.845355833	0.90017395	0.735231898	0.747443004	0.76057266	0.760754427	0.807348081	0.791966504	0.790454492	0.78922928	0.818807708	0.836718255	0.849003089	0.84951939	0.86897496	0.88067763	0.895140495	0.930329076
15:03:45.302	0.844260295	0.895671747	0.735450239	0.747505816	0.760693363	0.760964382	0.807528472	0.792167009	0.790710321	0.789542794	0.819274752	0.837338323	0.849548835	0.850022806	0.869519108	0.88126988	0.895663643	0.930855242
15:03:46.339	0.842047637	0.902548118	0.73532631	0.747555155	0.760761104	0.760948016	0.807585311	0.792264888	0.790811062	0.78963363	0.819362499	0.83743471	0.849641833	0.850046636	0.869433908	0.880866556	0.895216466	0.930245747
15:03:47.290	0.841506631	0.898756644	0.735476533	0.747641452	0.760828901	0.761029277	0.807741316	0.792470367	0.791076417	0.789934414	0.819787876	0.837915604	0.850166177	0.850511209	0.86993011	0.881300709	0.895698768	0.93071434
15:03:48.240	0.843669509	0.89652775	0.735583498	0.74772351	0.760947414	0.761210874	0.807954091	0.792671076	0.791251337	0.790185213	0.820005959	0.838213586	0.850440474	0.850805206	0.870188408	0.881274943	0.895689138	0.930545462
15:03:49.277	0.841624262	0.899450217	0.735703119	0.747812932	0.761054172	0.761241979	0.808248799	0.792996527	0.791647027	0.790681987	0.820591237	0.838975183	0.851355403	0.851662005	0.871207717	0.8823526	0.896772867	0.931651901
15:03:50.227	0.842325377	0.89452564	0.73582961	0.747884944	0.76119962	0.761522809	0.808496077	0.793283297	0.792011816	0.791139179	0.821193144	0.839578497	0.851998532	0.852384415	0.871974236	0.883140517	0.897513797	0.932423483
15:03:51.178	0.843370036	0.897562184	0.73580723	0.748054409	0.761351074	0.76158644	0.808691939	0.79361936	0.792370726	0.791587265	0.821721386	0.840242707	0.852712442	0.853020632	0.872785268	0.883832913	0.898119453	0.933000192
15:03:52.128	0.842381621	0.899387178	0.73585103	0.748075588	0.761455736	0.761706818	0.808902684	0.793835637	0.792629313	0.79188449	0.822045818	0.840638817	0.853100832	0.853360608	0.87299176	0.883737481	0.897953828	0.932714845
15:03:53.165	0.84204137	0.904095627	0.735926666	0.748162167	0.761610735	0.761857796	0.809150137	0.79411952	0.792999156	0.792323057	0.822514277	0.841232087	0.853787138	0.854028591	0.873688094	0.884227832	0.898480238	0.933139914
15:03:54.115	0.843694583	0.89867531	0.736042873	0.748285972	0.761768039	0.762025294	0.809404344	0.794473128	0.793384534	0.79282101	0.823180903	0.841947219	0.854532141	0.854730362	0.874434245	0.884870159	0.899159713	0.93376202
15:03:55.066	0.844134079	0.895297148	0.736035907	0.748372114	0.761863605	0.762116556	0.809610251	0.794708139	0.793662004	0.793147199	0.823570831	0.842290429	0.855024031	0.855234523	0.874990958	0.885337693	0.899620025	0.934177503
15:03:56.102	0.843605003	0.900311901	0.736069909	0.748437417	0.761933014	0.762171599	0.809681861	0.794825988	0.79384341	0.793321058	0.82377212	0.84254716	0.855165385	0.855484519	0.875226384	0.885458202	0.899709337	0.934189486
15:03:57.053	0.841310968	0.894344163	0.736117612	0.748452792	0.761931893	0.762257176	0.809813302	0.794909489	0.793926472	0.793432653	0.823903808	0.842700194	0.855186128	0.855581499	0.875237702	0.885233743	0.899496406	0.933928116
15:03:58.003	0.843699725	0.891055018	0.736280412	0.748469102	0.76203609	0.762285017	0.809865081	0.795033519	0.794018653	0.793603965	0.824015081	0.84276287	0.855346091	0.855735596	0.875427688	0.885338474	0.899599963	0.934030896
15:03:59.040	0.842661476	0.90145341	0.73617387	0.748523985	0.762084654	0.762320726	0.809910274	0.7951392	0.794151202	0.793746702	0.82424249	0.842924532	0.85546771	0.855922252	0.875539285	0.885404718	0.89963809	0.93404239
15:03:59.990	0.842833206	0.898364382	0.736340112	0.748472107	0.762146436	0.762320485	0.80998121	0.795209736	0.794260871	0.793871345	0.824427436	0.843179281	0.855663577	0.856100705	0.875767151	0.885496314	0.899710634	0.934078641
15:05:15.418	0.836566273	0.900643778	0.738069061	0.751360356	0.765017811	0.765235414	0.812406538	0.799892942	0.800345388	0.801399518	0.83349146	0.853502506	0.865040453	0.86588388	0.887326243	0.895089653	0.908971148	0.942599923
15:05:16.368	0.838112346	0.891786977	0.738100803	0.75125594	0.764979645	0.7651446	0.812214552	0.799728652	0.800205383	0.80119699	0.833164521	0.853218083	0.864867294	0.865628866	0.887085145	0.895042392	0.908992806	0.942652792
15:05:17.318	0.837602036	0.888612824	0.738229418	0.751331248	0.764953089	0.765114855	0.812053797	0.799571485	0.800023134	0.800974229	0.832917158	0.852951224	0.864492134	0.865281555	0.886862841	0.895055336	0.909073861	0.9428101
15:05:18.355	0.83821775	0.886364471	0.738035143	0.751260818	0.764841157	0.76497293	0.811792761	0.799319033	0.799742742	0.800624226	0.832441033	0.852405852	0.863941756	0.864684624	0.886240534	0.89454138	0.908529289	0.942280059
15:05:19.306	0.836855234	0.889284816	0.7380488	0.751268706	0.764792804	0.764969073	0.811655977	0.79915617	0.799552851	0.800399292	0.832113458	0.852052789	0.863599197	0.864343282	0.885991063	0.894477989	0.90848239	0.94229304
15:05:20.256	0.837118073	0.891727982	0.738176671	0.751293678	0.764729582	0.764946962	0.811506574	0.798979458	0.799382227	0.800179857	0.831844486	0.851794451	0.863289113	0.864061498	0.885728337	0.894317566	0.908399717	0.942255643
15:05:21.293	0.837882383	0.88773084	0.738057014	0.751216873	0.764667852	0.764813431	0.811302805	0.798814064	0.799198489	0.799941961	0.83150717	0.851421318	0.862955654	0.86370389	0.885369537	0.894114719	0.908294743	0.942126016
15:05:22.243	0.840321786	0.891009772	0.737930617	0.751219953	0.76465636	0.764689062	0.811165308	0.798689159	0.799057387	0.799771532	0.831313586	0.85117497	0.862688574	0.863421721	0.885122498	0.894016272	0.90824457	0.942022844
15:05:23.194	0.839315802	0.887421958	0.738215665	0.75120963	0.764619253	0.764857422	0.811163214	0.798664602	0.799038849	0.799788655	0.83130355	0.85118892	0.862696645	0.863459991	0.885320219	0.894360324	0.908679672	0.942418765
15:05:24.230	0.836177951	0.895686244	0.738008754	0.751273926	0.764620258	0.764793965	0.811081254	0.798580145	0.798959048	0.799686321	0.831173956	0.851063278	0.862505609	0.863292768	0.885198259	0.894273259	0.908604443	0.942371606
15:05:25.181	0.837918468	0.886770697	0.738065367	0.7512739	0.764620937	0.764855381	0.811063167	0.798616795	0.799001459	0.799754532	0.831314555	0.851149696	0.862673603	0.863414302	0.885371923	0.894604999	0.908908034	0.942794733
15:05:26.131	0.837902187	0.89098837	0.738087002	0.751361054	0.764642944	0.764923926	0.811024603	0.798655536	0.799051559	0.799792575	0.831355226	0.851248317	0.86265849	0.863452521	0.885410729	0.894670205	0.909008924	0.942907511
15:05:27.082	0.838429417	0.888855238	0.738076376	0.751346407	0.764689274	0.764828792	0.810979	0.798631335	0.799040279	0.799787142	0.831331324	0.851129059	0.862573225	0.863396455	0.885360308	0.894532056	0.908875932	0.942773856
15:05:28.118	0.837059351	0.886573847	0.738115536	0.75139	0.764712965	0.764854007	0.810998396	0.798687849	0.799103809	0.799880655	0.831413008	0.851272269	0.862676625	0.863504397	0.885477568	0.894715717	0.909069279	0.942944594
15:05:29.069	0.837414157	0.888946558	0.73818579	0.751453957	0.764828389	0.764880403	0.811105396	0.798832175	0.799289366	0.80011189	0.83167797	0.851705049	0.863082189	0.863899815	0.886068444	0.895308317	0.909682531	0.943603388
15:05:30.019	0.839834289	0.895010377	0.738316974	0.751518706	0.764825646	0.765039915	0.811158543	0.798872915	0.799361977	0.800178959	0.831727953	0.85182103	0.863042307	0.863875469	0.885982775	0.895078911	0.909383883	0.943297021
15:05:31.056	0.836005691	0.886234414	0.738160118	0.751605645	0.764937832	0.765068955	0.81126895	0.799038801	0.7995611	0.800413026	0.831975157	0.852092133	0.86337644	0.864176225	0.886265965	0.895377769	0.909617964	0.9435338
15:05:32.006	0.836538281	0.884534575	0.738264347	0.751513799	0.764957572	0.765189856	0.811299757	0.799099173	0.799629113	0.800498597	0.832131688	0.852190833	0.86343074	0.86420786	0.886237986	0.895190031	0.909292847	0.943189235
15:05:32.957	0.837972049	0.892157754	0.738428274	0.751626845	0.765041175	0.765182155	0.811365165	0.799237457	0.799792869	0.800699926	0.832342672	0.852527326	0.863667523	0.86447124	0.886475201	0.895287173	0.909341349	0.94330431
15:05:33.994	0.837473516	0.886676356	0.738400048	0.751736523	0.765100723	0.765298987	0.811500972	0.799420013	0.799978106	0.800950535	0.832691248	0.852957855	0.864023844	0.864882893	0.887029732	0.895870845	0.90983619	0.943826533
15:05:34.944	0.837265856	0.89260293	0.738481149	0.751786421	0.765214323	0.76536557	0.811664224	0.799571168	0.800217714	0.801214497	0.832978723	0.853347487	0.864494711	0.865273	0.887521485	0.896420163	0.910346157	0.94443826
15:05:35.894	0.837906049	0.88881802	0.738532083	0.75189138	0.76527449	0.765417528	0.811605165	0.799589468	0.800245686	0.80123603	0.832942095	0.853288681	0.864467669	0.865254577	0.88738774	0.896193484	0.910081754	0.944142469
15:05:36.931	0.837776574	0.889378242	0.738477988	0.751803525	0.765273424	0.765497647	0.811560871	0.799575236	0.800223506	0.801200403	0.832863447	0.853197719	0.864249049	0.865056145	0.887112621	0.895667259	0.909626922	0.943604825
15:05:37.882	0.837174065	0.890701672	0.738613474	0.751993196	0.765369776	0.765538645	0.81172229	0.79978177	0.800469393	0.801531616	0.83330482	0.853539495	0.864819615	0.865563438	0.887796987	0.896540509	0.910446366	0.94444524
15:05:38.832	0.83564651	0.890851883	0.738432154	0.75201403	0.765393557	0.765511632	0.81172363	0.799815461	0.800518918	0.801589806	0.833404846	0.853537567	0.864773247	0.865548647	0.887821236	0.896501344	0.910352799	0.944342256
15:05:39.782	0.837886628	0.890770227	0.738558699	0.752093473	0.765435173	0.765636776	0.811756695	0.799891799	0.800633059	0.801710323	0.833585226	0.853771214	0.864958095	0.865756192	0.888154402	0.896965341	0.910707787	0.94484126
15:05:40.819	0.836627913	0.879880163	0.738524202	0.752001289	0.765385095	0.76557556	0.811585753	0.799751161	0.800461586	0.801481011	0.833243647	0.853324295	0.864526141	0.865300066	0.887454657	0.89605153	0.909783554	0.94380001
15:05:41.770	0.83757531	0.888909816	0.738499871	0.752021685	0.765453472	0.76557292	0.811684023	0.799854164	0.800591804	0.801680673	0.833586852	0.853767439	0.864822842	0.865708858	0.888149361	0.897124996	0.910768128	0.945055803
15:05:42.720	0.837844233	0.881809791	0.738665911	0.752129626	0.765344218	0.765598831	0.81150955	0.799718292	0.800436266	0.801475962	0.833285333	0.853438806	0.864486207	0.865374315	0.887775966	0.896701421	0.910356199	0.944658103
15:05:43.670	0.838373399	0.889946986	0.738535233	0.752102048	0.765324448	0.765477954	0.81136678	0.799587213	0.800295506	0.801312238	0.833068952	0.853182854	0.864226562	0.865050992	0.887460573	0.896440338	0.910034179	0.944324086
15:05:44.707	0.835893262	0.885824187	0.738596635	0.752021042	0.765239162	0.76541543	0.811201695	0.799343502	0.800018134	0.800957922	0.83251965	0.852590919	0.863685347	0.864468278	0.886738225	0.895695465	0.909286496	0.943561287
15:05:45.658	0.835469643	0.890957443	0.738533918	0.751994543	0.76522631	0.765401175	0.811054756	0.799240786	0.799921042	0.800832853	0.832415333	0.852454296	0.863493435	0.864344923	0.886697791	0.895846731	0.909469087	0.943858713
15:05:46.608	0.836504172	0.88927099	0.738630239	0.752068697	0.765162461	0.765348555	0.810945788	0.799110025	0.799787923	0.800695006	0.832200526	0.852284662	0.863309116	0.864102228	0.886584719	0.895874636	0.909536133	0.943963621
15:05:47.645	0.836891386	0.88801191	0.738488531	0.752049472	0.765150712	0.765323975	0.810736237	0.798996327	0.799679501	0.800558335	0.832047402	0.852090556	0.863087293	0.863893002	0.88642875	0.895883942	0.909618209	0.944048542
15:05:48.595	0.836025426	0.885651745	0.738559838	0.75202584	0.765138317	0.765327405	0.810726744	0.798943886	0.799635119	0.800526998	0.83207595	0.852014669	0.863031393	0.863874374	0.88651667	0.896140264	0.909949439	0.944385572
15:05:49.546	0.837705832	0.886023235	0.738553596	0.752082382	0.765102993	0.765340425	0.810603212	0.798904056	0.799588854	0.800451076	0.831963704	0.851961588	0.862907104	0.863757144	0.886515662	0.896326578	0.910134312	0.944637407
15:05:50.582	0.838857258	0.89026338	0.738447019	0.75206406	0.765044527	0.765280824	0.810447896	0.798679659	0.799359503	0.800175129	0.831487419	0.851532048	0.86242837	0.863235485	0.885865834	0.895594579	0.90936073	0.943802304
15:05:51.533	0.837102854	0.890420176	0.738523081	0.752045503	0.765038482	0.765160998	0.810217088	0.798477418	0.799164778	0.799934222	0.831140414	0.85109253	0.861893146	0.862756872	0.8852354	0.894881348	0.908613817	0.943044197
15:05:52.483	0.83628483	0.887869714	0.738551043	0.752068259	0.765014746	0.765169984	0.810248953	0.798538618	0.799183287	0.799960064	0.831175373	0.851129235	0.861926585	0.862810701	0.885356884	0.89512512	0.908792855	0.943334283
15:05:53.520	0.838956798	0.883483915	0.738554109	0.752083467	0.765031239	0.765218738	0.810191958	0.798477327	0.799162868	0.79994303	0.831159239	0.85108874	0.861852598	0.862688496	0.885243211	0.894968876	0.908569774	0.943201238
15:05:54.470	0.837461744	0.88546592	0.738588017	0.752029536	0.765039731	0.7651856	0.810132156	0.79843829	0.799128478	0.799874492	0.831030479	0.850900218	0.86169008	0.862530713	0.885019841	0.894713024	0.908218044	0.94290204
15:05:55.421	0.835101591	0.888220819	0.73848722	0.752187919	0.765047564	0.765118476	0.810121502	0.79845441	0.79915002	0.799909519	0.831032612	0.850956769	0.861655756	0.862533641	0.885028084	0.894675062	0.908085175	0.942857137
15:05:56.458	0.837527034	0.883754661	0.738523174	0.752151492	0.76504219	0.76527073	0.810068615	0.798481035	0.799176671	0.79995788	0.831092722	0.851045441	0.861736586	0.862569565	0.885108966	0.894794058	0.908083438	0.94299694
15:05:57.408	0.83680186	0.884111994	0.738560459	0.752146082	0.76502015	0.765268699	0.809996736	0.798402773	0.799100122	0.799839552	0.830908194	0.850825919	0.861476214	0.862339091	0.884831798	0.894458343	0.907731558	0.94264305
15:05:58.358	0.835359632	0.887322675	0.73854533	0.752224578	0.765042434	0.765221501	0.809914388	0.798338538	0.799080791	0.799815816	0.830917665	0.850828066	0.861366875	0.862295774	0.884883966	0.894670928	0.907872093	0.942841207
15:05:59.309	0.838644326	0.889207541	0.738593505	0.752194236	0.764988092	0.765283285	0.809799386	0.798244904	0.798980164	0.799692775	0.830736562	0.85059124	0.86115985	0.862074727	0.884577702	0.894367586	0.907586617	0.942540981
15:06:00.346	0.835892242	0.887754863	0.738508913	0.752160108	0.764982671	0.765111182	0.809670668	0.79815954	0.79885554	0.799551268	0.830517495	0.850331095	0.860947114	0.861855312	0.884412248	0.894311519	0.907552839	0.942577057
15:07:15.946	0.833497782	0.858500687	0.740103325	0.754901696	0.766731603	0.767006718	0.808698542	0.799322827	0.799665793	0.802297426	0.833107014	0.853635799	0.862605094	0.863928411	0.889162972	0.901656106	0.913002142	0.950618719
15:07:16.982	0.836013629	0.879191912	0.740316524	0.754905664	0.766811556	0.76709493	0.808767776	0.799395473	0.799947788	0.802371884	0.83308897	0.853740085	0.862716394	0.864014304	0.889279279	0.90185382	0.912974437	0.950524608
15:07:17.933	0.836388417	0.877980817	0.740390539	0.755076978	0.767012378	0.767220586	0.808915731	0.799654895	0.800191503	0.802702177	0.833442208	0.854147448	0.863162324	0.864395607	0.889649395	0.902147582	0.913323288	0.950842479
15:07:18.883	0.835305629	0.875506956	0.740352228	0.755159852	0.767095432	0.767292604	0.809018645	0.799765076	0.800451058	0.802904353	0.833618212	0.854421327	0.863381413	0.864629961	0.889914155	0.902397018	0.913495492	0.951061494
15:07:19.920	0.83405922	0.879196888	0.740526439	0.755236488	0.76716281	0.767452998	0.809078577	0.799843061	0.800582797	0.803035468	0.833775483	0.854548524	0.863538401	0.86479868	0.890121119	0.902511903	0.913597292	0.951177057
15:07:20.870	0.8324559	0.878471155	0.740599337	0.755294741	0.767161439	0.76746401	0.809055216	0.799871842	0.80061231	0.803084897	0.833803597	0.854637602	0.863526295	0.864818894	0.890162745	0.902498466	0.913522833	0.951079292
15:07:21.821	0.833998083	0.881826865	0.740587083	0.755346619	0.767142765	0.767379059	0.808895282	0.799757925	0.800470019	0.802890137	0.833526288	0.854244434	0.863144469	0.864398679	0.889562027	0.901829657	0.912803101	0.950327346
15:07:22.858	0.834249698	0.874652763	0.740785072	0.755369236	0.767189781	0.767453801	0.80895193	0.79983895	0.800600394	0.803045423	0.833777892	0.854534805	0.863399321	0.864674081	0.89005759	0.902522653	0.913443497	0.951136629
15:07:23.808	0.833721022	0.876687418	0.740642622	0.755336163	0.767141835	0.767422114	0.80879144	0.799692785	0.800495676	0.802844596	0.833483664	0.854242773	0.863083544	0.864328638	0.889719247	0.902239174	0.913107254	0.950832348
15:07:24.758	0.83405742	0.875687302	0.74066297	0.755332559	0.767113172	0.767425018	0.808770838	0.799642525	0.80050139	0.802780851	0.833379437	0.854142996	0.863024779	0.864247659	0.88971655	0.902382022	0.913285859	0.951075339
15:07:25.795	0.836130336	0.878429917	0.740549782	0.755378676	0.767096524	0.767286412	0.808639475	0.799533542	0.800267636	0.802663766	0.833353642	0.854017011	0.862811017	0.864096597	0.889668587	0.902522456	0.913391582	0.951264563
15:07:26.746	0.83460607	0.876209934	0.740707553	0.755420174	0.767060041	0.767404448	0.808619386	0.799479375	0.800270999	0.802603313	0.833217642	0.854000255	0.862851864	0.86407912	0.88968876	0.902714789	0.9136155	0.951609639
15:07:27.696	0.833725821	0.880194969	0.740686478	0.755458209	0.767103692	0.767377138	0.808524056	0.799449409	0.800190514	0.802551455	0.833262472	0.854006822	0.862769617	0.864048714	0.889761859	0.902982406	0.913836971	0.951959399
15:07:28.646	0.834298219	0.876148155	0.740636126	0.755367108	0.767046261	0.767241964	0.808371825	0.799329192	0.800226903	0.802403038	0.833063331	0.85380174	0.862483482	0.863801064	0.889545369	0.902847368	0.913618942	0.951816854
15:07:29.683	0.835767259	0.88019403	0.740579803	0.755445471	0.767049348	0.767348688	0.80835685	0.799276098	0.800121479	0.802335651	0.832974889	0.853689618	0.86237098	0.863687084	0.889434402	0.902788535	0.913565983	0.951813105
15:07:30.634	0.835089644	0.878246433	0.740719154	0.755450796	0.767063324	0.767402195	0.808234688	0.799255118	0.80008465	0.802275731	0.832878373	0.853592613	0.862275438	0.863581581	0.889354872	0.90278394	0.913510049	0.951767699
15:07:31.584	0.835679506	0.874271269	0.740760983	0.75548412	0.767078184	0.767376216	0.808226128	0.799165337	0.799936227	0.80222046	0.832831373	0.853437138	0.862101365	0.863398904	0.889185095	0.902583441	0.913302401	0.95154384
15:07:32.621	0.833115285	0.878785653	0.74070688	0.755570237	0.767075531	0.767368042	0.808222592	0.799188256	0.800093139	0.802234867	0.832815857	0.853406125	0.862052428	0.863392439	0.889157214	0.902590604	0.913222566	0.951567603
15:07:33.571	0.833870961	0.873689516	0.740688933	0.755531178	0.767072313	0.76734251	0.80815061	0.799129356	0.799982387	0.80219508	0.832730309	0.853287417	0.861924491	0.863219262	0.888961566	0.902414683	0.91298506	0.95135176
15:07:34.522	0.835656748	0.882197609	0.740688527	0.755562582	0.767094323	0.767385351	0.808123292	0.79914988	0.799949586	0.802225144	0.832662928	0.853253174	0.861911167	0.863238082	0.889013771	0.902505608	0.913017223	0.951434369
15:07:35.558	0.835070306	0.876766604	0.740635276	0.755632991	0.767163322	0.767448852	0.808145147	0.79920137	0.800119639	0.802290007	0.832815259	0.853278353	0.8619418	0.863296472	0.88911914	0.902666507	0.913240392	0.951601997
15:07:36.509	0.835861567	0.877747634	0.740684233	0.755694616	0.767191013	0.767458226	0.8081375	0.79922013	0.800113658	0.802357542	0.832827601	0.85342073	0.861914359	0.863353972	0.889205879	0.902817201	0.913309484	0.951746018
15:07:37.459	0.835348742	0.873602926	0.740774764	0.755744905	0.767203554	0.76751507	0.808161574	0.799278592	0.800308095	0.802434366	0.832875269	0.853519648	0.86196995	0.86344244	0.889376076	0.9030248	0.913422844	0.952062257
15:07:38.410	0.833216956	0.877695119	0.740845672	0.75575383	0.767271827	0.767472443	0.808114545	0.799263027	0.800261665	0.802442277	0.832824493	0.853504392	0.861960511	0.863416678	0.889406977	0.903120557	0.913373071	0.952166752
15:07:39.446	0.834979456	0.883976637	0.740847345	0.755819706	0.767298106	0.767502857	0.808105025	0.799294893	0.800299931	0.802500291	0.832919716	0.8536599	0.861957431	0.86352271	0.889594296	0.903510141	0.91362223	0.952583517
15:07:40.397	0.836540801	0.873782838	0.740931498	0.755871912	0.7672702	0.767532651	0.808108065	0.799312729	0.800209335	0.80250455	0.832933219	0.853595324	0.861982967	0.863488283	0.889663534	0.903685644	0.91373928	0.952748765
15:07:41.347	0.835496351	0.882339036	0.740808115	0.75594939	0.767273363	0.767592714	0.807974731	0.799225756	0.80016239	0.802418392	0.832807338	0.853477099	0.861737997	0.86330238	0.889404403	0.903389387	0.913388952	0.952421316
15:07:42.384	0.834641845	0.873141358	0.740931474	0.755938053	0.767308156	0.767655353	0.807988292	0.799235869	0.800193122	0.802409972	0.83271589	0.853479692	0.861666764	0.863261767	0.889428232	0.903502659	0.91331695	0.952531864
15:07:43.334	0.832556592	0.870815904	0.741007186	0.755911794	0.767289806	0.767490161	0.807857302	0.799137139	0.800193953	0.802320362	0.832627741	0.853280864	0.861439508	0.863022139	0.889156232	0.903210708	0.913160591	0.952250988
15:07:44.285	0.834630555	0.875672388	0.740962109	0.755961654	0.767324827	0.76764005	0.807817498	0.799108571	0.80011979	0.802252404	0.832525174	0.853115088	0.861327546	0.862899459	0.889007948	0.903095624	0.912962823	0.952170144
15:07:45.322	0.834735042	0.875161147	0.741033764	0.756032224	0.767278916	0.767631887	0.807838367	0.799062223	0.800134638	0.802217857	0.832420734	0.853076098	0.861193007	0.862795281	0.888940828	0.903087755	0.913101464	0.952217986
15:07:46.272	0.835138963	0.873727905	0.740990076	0.756036974	0.76727904	0.767558604	0.807714414	0.799021864	0.800090489	0.80218674	0.832399766	0.852964806	0.861124421	0.862726755	0.888929891	0.903211317	0.91308544	0.952316846
15:07:47.222	0.832195385	0.874192233	0.741061792	0.755938269	0.767290276	0.767575504	0.807610316	0.798928699	0.800000551	0.802035785	0.832221989	0.852745946	0.86085589	0.862433997	0.888652842	0.902933478	0.912779883	0.95201057
15:07:48.173	0.833724991	0.872123887	0.741020185	0.756092934	0.767320133	0.767603674	0.807641802	0.798971752	0.800023509	0.802132196	0.832312379	0.85292303	0.861039204	0.86263084	0.888969834	0.903499742	0.913448634	0.952757072
15:07:49.210	0.834253511	0.875011685	0.741060227	0.756077521	0.767281489	0.767566254	0.807496027	0.798856739	0.799935264	0.802013729	0.832111563	0.852687708	0.860727571	0.862387943	0.888669601	0.903217487	0.913104539	0.952429821
15:07:50.160	0.83381184	0.874446972	0.740991508	0.756094606	0.767274276	0.767544774	0.807406391	0.798826995	0.799870337	0.801920914	0.832031905	0.852562406	0.860685148	0.862238535	0.888576871	0.903182518	0.913115066	0.952400996
15:07:51.110	0.833891206	0.875227414	0.740930961	0.756130027	0.767254532	0.767638861	0.807334539	0.798723652	0.799776531	0.801810759	0.831801408	0.852361167	0.860415749	0.862013949	0.888340359	0.90293423	0.912890876	0.952145392
15:07:52.147	0.833524071	0.873935888	0.740991486	0.756103398	0.767275578	0.767514278	0.807268113	0.79869393	0.799738396	0.801783232	0.831821072	0.852321123	0.860331563	0.861941752	0.888315109	0.902986785	0.91290784	0.952213651
15:07:53.098	0.834446003	0.874022552	0.741030548	0.756166005	0.767329176	0.767667448	0.807256943	0.798748036	0.799840124	0.801884502	0.831926088	0.852498333	0.860565533	0.862142947	0.888615346	0.903403719	0.91343077	0.952678354
15:07:54.048	0.834880689	0.871795318	0.74098988	0.756185028	0.767372005	0.767668545	0.807257773	0.798726158	0.799701713	0.801875348	0.831943874	0.852486725	0.860443182	0.862056268	0.888503973	0.903238144	0.913249936	0.952503619
15:07:55.085	0.834197054	0.877186433	0.741059247	0.756290603	0.767417616	0.767827576	0.807302659	0.79883501	0.799836012	0.802075352	0.832056656	0.852818085	0.860827821	0.862348808	0.888915014	0.903726082	0.913803212	0.953063926
15:07:56.035	0.833266552	0.869086045	0.741137221	0.756331462	0.767455371	0.767745116	0.807406607	0.798901984	0.799935968	0.8021786	0.832223412	0.852917119	0.860915245	0.862431323	0.888968952	0.90371044	0.913824388	0.952950951
15:07:56.986	0.832564839	0.869440913	0.741231949	0.756324847	0.767491452	0.767877883	0.807445597	0.799068554	0.800083764	0.802410392	0.832472854	0.853308679	0.861228982	0.862754189	0.889359958	0.904013386	0.914181505	0.953272361
15:07:58.022	0.832787447	0.877142171	0.741089731	0.756452348	0.76760378	0.767897773	0.807551485	0.799132369	0.800168658	0.802533879	0.832613732	0.853494018	0.861249757	0.86283829	0.889382058	0.903907203	0.914055506	0.953033912
15:07:58.973	0.832759553	0.876196353	0.741397096	0.756578424	0.767749826	0.768140516	0.807821468	0.799535324	0.800628923	0.803071622	0.833383416	0.854285073	0.862215963	0.863734376	0.890485228	0.905140766	0.915358386	0.954340011
15:07:59.923	0.834366185	0.87283422	0.74150319	0.756672529	0.7679322	0.768242004	0.807975896	0.79975583	0.800885508	0.803457377	0.833702384	0.854810913	0.862779621	0.864239713	0.891125388	0.905789075	0.915970778	0.954978272
15:09:15.437	0.82809897	0.852542158	0.738919957	0.755410562	0.762546142	0.763262375	0.793427417	0.784914781	0.784868402	0.783617545	0.80813606	0.826266646	0.831977997	0.833769419	0.862772223	0.888985684	0.900938941	0.942980856
15:09:16.387	0.830205036	0.861735735	0.739421356	0.755493763	0.762870156	0.763388098	0.793412076	0.785051084	0.785047277	0.78390701	0.808338852	0.826896393	0.83240249	0.834290804	0.863465141	0.889998802	0.901551372	0.943883177
15:09:17.338	0.828841973	0.862149652	0.739756983	0.755717216	0.763062339	0.763676818	0.793652684	0.785342813	0.78546501	0.78426405	0.808760791	0.827246149	0.832705666	0.834666781	0.863776496	0.890148849	0.901675353	0.943980619
15:09:18.288	0.828297208	0.861180664	0.739808358	0.755841795	0.76326668	0.763777519	0.793942678	0.785700231	0.785764766	0.784793029	0.809459295	0.828105344	0.83336784	0.835453425	0.864723923	0.891104295	0.902219669	0.944919782
15:09:19.325	0.829222597	0.859337862	0.739849193	0.755964771	0.763456534	0.763998119	0.794238713	0.78608758	0.786117043	0.785333685	0.810188744	0.828861758	0.834076686	0.836207262	0.865618787	0.891877459	0.90283822	0.945729931
15:09:20.275	0.829111225	0.864981966	0.74007555	0.756237033	0.763642306	0.764286894	0.794618109	0.786485695	0.78644371	0.785903705	0.810855601	0.829614864	0.834866659	0.836964196	0.866410267	0.892525749	0.903415888	0.946241786
15:09:21.226	0.82992162	0.86267285	0.740228921	0.756330058	0.763832827	0.764457571	0.794888902	0.786828813	0.786956121	0.786335594	0.811306079	0.830053479	0.83533289	0.837416323	0.866639739	0.892285032	0.902971548	0.945743604
15:09:22.262	0.830329432	0.859591218	0.74024525	0.756536925	0.764147088	0.764738066	0.795344963	0.787435035	0.787593458	0.787176508	0.812301349	0.831153241	0.836592953	0.8385409	0.867796261	0.893165011	0.903878399	0.946459768
15:09:23.213	0.831154556	0.864106655	0.740517096	0.756834119	0.764470126	0.765137987	0.79596376	0.788165154	0.788228481	0.788228613	0.813647251	0.83275573	0.838124909	0.840038308	0.869479071	0.894684121	0.90530933	0.947851666
15:09:24.163	0.828517533	0.860189535	0.740748314	0.75704528	0.764852033	0.765505063	0.79656317	0.788935584	0.789207801	0.789247166	0.815002586	0.834191236	0.839564424	0.841508353	0.871032545	0.895999736	0.906516712	0.949050452
15:09:25.200	0.832349549	0.85822072	0.740928401	0.7572849	0.765203313	0.765916721	0.797137054	0.789635114	0.790118374	0.790246468	0.816152115	0.835513072	0.841000483	0.842933303	0.872474613	0.897089767	0.907526752	0.950021557
15:09:26.150	0.831061099	0.861857036	0.741139739	0.757464613	0.76545049	0.766203755	0.797654963	0.790244706	0.79080491	0.79109623	0.817172566	0.836591323	0.842138005	0.844013382	0.873472053	0.89756868	0.907770939	0.950214912
15:09:27.101	0.829356169	0.857042805	0.741357295	0.757793169	0.76579293	0.766469426	0.79819646	0.790887446	0.791619834	0.791973737	0.818175333	0.837775858	0.843142857	0.845179839	0.874618831	0.898368561	0.90851365	0.950790728
15:09:28.051	0.830449782	0.862551569	0.741551173	0.757963889	0.766133138	0.766806367	0.798643809	0.791473819	0.792394093	0.79281965	0.819163234	0.839005341	0.844155349	0.846274023	0.875647326	0.899013134	0.909023231	0.951213675
15:09:29.088	0.832191036	0.860702023	0.741737426	0.758248311	0.766436513	0.76708473	0.799179452	0.792139543	0.793094651	0.793720606	0.820247244	0.840137361	0.845543725	0.847547542	0.877038156	0.900125743	0.910096706	0.952219858
15:09:30.038	0.83263045	0.860764073	0.741845544	0.758420107	0.766699468	0.767372676	0.799589427	0.792702825	0.793853196	0.794510003	0.821237078	0.841114116	0.846631925	0.848575699	0.878098873	0.900908224	0.910657348	0.952838582
15:09:30.989	0.833559694	0.863683461	0.742129193	0.758624785	0.767006955	0.767709752	0.800155725	0.793280681	0.794449478	0.795296793	0.822140862	0.842244302	0.847731302	0.849668045	0.879265217	0.90194871	0.91139516	0.953629828
15:09:32.026	0.83013726	0.860348278	0.742139331	0.758809818	0.76722042	0.767916541	0.800495722	0.793670751	0.795027308	0.795865701	0.822844556	0.842965954	0.848274887	0.850421266	0.879994082	0.902392462	0.911716261	0.953984979
15:09:32.976	0.831692067	0.857425423	0.742392644	0.759002896	0.767449044	0.768155472	0.80079952	0.794149103	0.79535989	0.796512226	0.823497201	0.84382799	0.849105394	0.851273442	0.880877138	0.90319193	0.912093821	0.954666886
15:09:33.926	0.831620868	0.861074284	0.742397369	0.759162777	0.767581456	0.768230834	0.800967074	0.794440552	0.795754339	0.796889149	0.823994797	0.844373959	0.849672535	0.85179433	0.881326418	0.903456578	0.912203962	0.954829086
15:09:34.963	0.831414284	0.861671883	0.742511665	0.75924983	0.767742809	0.768452198	0.801154982	0.794681125	0.795917265	0.797246905	0.824456481	0.844703037	0.850162498	0.852296133	0.881885787	0.903797814	0.91249952	0.955105453
15:09:35.914	0.832123961	0.861851532	0.742551967	0.759270208	0.767845299	0.768569573	0.801337039	0.794826265	0.796149642	0.79748143	0.824763907	0.845023726	0.850480224	0.852594259	0.882272638	0.904117037	0.912936711	0.955315503
15:09:36.864	0.830640621	0.864093758	0.742608962	0.759414988	0.767899355	0.768598212	0.801368025	0.794949245	0.796335831	0.797650298	0.824948938	0.845339143	0.850796808	0.852891905	0.882622821	0.904623556	0.913500777	0.955842972
15:09:37.814	0.832399674	0.862441462	0.74257012	0.759374252	0.767859164	0.768586397	0.801253856	0.794842039	0.796297886	0.797529475	0.824797676	0.845192383	0.850582651	0.852650235	0.882350711	0.904334351	0.913123868	0.955469378
15:09:38.851	0.831205379	0.856938341	0.742637594	0.759427871	0.767877477	0.768610397	0.801206502	0.794825127	0.796184041	0.797458512	0.824685619	0.845116578	0.85049733	0.852570394	0.882349792	0.904406875	0.913318487	0.955598652
15:09:39.802	0.82946772	0.860938275	0.742642764	0.759390574	0.767808532	0.768560543	0.801046281	0.794639279	0.796049585	0.797252188	0.824513225	0.844805839	0.850105625	0.852204502	0.881977661	0.904130092	0.912874597	0.95527215
15:09:40.838	0.831869266	0.862516828	0.742683984	0.759455797	0.767839402	0.76861739	0.800949804	0.794603684	0.795976696	0.797178301	0.824417023	0.844777538	0.850145527	0.852187222	0.88205139	0.90441025	0.913261658	0.955598985
15:09:41.789	0.83119796	0.859905362	0.742630425	0.759486997	0.767825755	0.768554973	0.80090866	0.794546383	0.796006324	0.797161143	0.824414934	0.84476096	0.850039704	0.852223779	0.8822199	0.90470634	0.913772621	0.956066303
15:09:42.739	0.830085954	0.861134429	0.74272127	0.75953871	0.767779224	0.768488759	0.800707057	0.794354239	0.795678093	0.796899792	0.824005662	0.844316346	0.849652095	0.851767022	0.881745973	0.904298561	0.913381133	0.955650185
15:09:43.690	0.831653878	0.859240736	0.742667445	0.75946792	0.767697786	0.768407308	0.800528555	0.794137397	0.795427433	0.796586094	0.823599981	0.843784932	0.849113573	0.851246643	0.881177143	0.903836178	0.912920203	0.955199265
15:09:44.726	0.830858948	0.860347055	0.74256914	0.759396258	0.767652084	0.768407608	0.800301918	0.793950211	0.795270763	0.796354831	0.823373343	0.843480891	0.848736191	0.850915996	0.880909354	0.903700036	0.912850999	0.955116083
15:09:45.677	0.831200253	0.855463326	0.742573507	0.759445946	0.767612077	0.768429039	0.800214953	0.793868591	0.795045824	0.796243645	0.82320342	0.843374621	0.848630446	0.850817767	0.880928431	0.904018791	0.913144086	0.955627026
15:09:46.627	0.830259383	0.858229379	0.742626999	0.759378387	0.767515395	0.768240388	0.800063535	0.793644237	0.794882863	0.795979086	0.822854911	0.843025504	0.848231707	0.850419546	0.880648198	0.90398404	0.913187728	0.955693558
15:09:47.664	0.829667857	0.85811115	0.742517237	0.759337102	0.767432772	0.768155242	0.799740349	0.793315558	0.794481917	0.795514451	0.822228953	0.842402718	0.847410048	0.849636766	0.879784975	0.903259251	0.912322942	0.954998057
15:09:48.614	0.831057289	0.861303129	0.742516825	0.759310668	0.767317174	0.76810691	0.799558045	0.793127848	0.794243189	0.795208811	0.82181387	0.841982504	0.846911555	0.849172272	0.879321421	0.903037038	0.912121394	0.954804246
15:09:49.565	0.830252119	0.857021013	0.742540296	0.759299511	0.76728103	0.768021301	0.799316324	0.792836276	0.793883548	0.79484444	0.821358581	0.841508837	0.846294316	0.848587531	0.878720032	0.902620568	0.911602533	0.954399057
15:09:50.602	0.828806049	0.8557565	0.742524092	0.759313971	0.767244711	0.767995202	0.799114884	0.79267807	0.793861549	0.794606879	0.820986033	0.841160895	0.845977262	0.848266696	0.878456504	0.90252872	0.91151227	0.954424478
15:09:51.552	0.829839315	0.856536787	0.742519473	0.7592327	0.7671075	0.767830128	0.798777016	0.792320633	0.793364582	0.794122385	0.820385324	0.840398278	0.845225385	0.847489145	0.877566239	0.901678992	0.910525914	0.953580783
15:09:52.502	0.829229164	0.858053008	0.742428543	0.759239833	0.767046676	0.767798397	0.798694348	0.792149756	0.79324219	0.793947632	0.820150006	0.840172352	0.844970893	0.847234474	0.877409902	0.901684806	0.910555742	0.953737183
15:09:53.453	0.828681239	0.862326017	0.742494949	0.759193757	0.767057998	0.767726674	0.798536529	0.79204162	0.793169196	0.793766889	0.819882298	0.839984699	0.844743471	0.846999255	0.877312695	0.901884883	0.910692714	0.953998819
15:09:54.490	0.832312978	0.856231448	0.742453865	0.759285017	0.76697014	0.767706371	0.798398361	0.791879511	0.792877089	0.793540689	0.819582319	0.839636421	0.844466468	0.846614998	0.876911924	0.901634458	0.91041601	0.953762807
15:09:55.440	0.832322587	0.861162413	0.742531241	0.759264132	0.766962858	0.767696633	0.798334391	0.791819341	0.792792323	0.793431695	0.819487606	0.839522136	0.844269379	0.846464673	0.876772414	0.901667281	0.910528227	0.953862602
15:09:56.390	0.831474113	0.858094552	0.742616695	0.759315073	0.76700542	0.767833546	0.798313989	0.791799799	0.792906874	0.793432843	0.819484946	0.839429635	0.844181326	0.846401449	0.87683527	0.901864736	0.910726255	0.954136294
15:09:57.427	0.830737999	0.863469133	0.742519972	0.759348472	0.766977981	0.767714743	0.798183993	0.791719019	0.792731608	0.793333486	0.819290275	0.839251637	0.8439438	0.846153275	0.876602714	0.901625756	0.910607316	0.953924112
15:09:58.378	0.832088129	0.856495155	0.742625705	0.759366948	0.767039477	0.767729901	0.798174863	0.791722783	0.79276311	0.793319364	0.819255519	0.839193613	0.843936943	0.846165994	0.876684968	0.901901526	0.910987059	0.954297148
15:09:59.328	0.832780695	0.85764726	0.742577511	0.759464542	0.766994809	0.767755983	0.798045015	0.79158096	0.792596011	0.793110807	0.81900844	0.838913731	0.843649441	0.845814819	0.876281025	0.901638129	0.910512797	0.954010759
15:11:15.360	0.833423447	0.848488292	0.743154489	0.759808584	0.764653117	0.765662826	0.789071231	0.78153542	0.781379228	0.778883554	0.80077966	0.819075932	0.822685364	0.824912189	0.856710177	0.891323043	0.900568712	0.946819138
15:11:16.397	0.831489804	0.849586914	0.743232506	0.759890281	0.76482946	0.76568706	0.789101211	0.781563451	0.78120661	0.778968558	0.800957026	0.819201869	0.822871161	0.825117611	0.857048286	0.891905453	0.900915044	0.947459754
15:11:17.347	0.831082967	0.850829519	0.743281971	0.760045191	0.764931692	0.765865261	0.789180668	0.781593404	0.781091672	0.778953184	0.800932222	0.819120452	0.822748828	0.824987756	0.85684889	0.89165902	0.900565105	0.947130885
15:11:18.298	0.830831042	0.849028155	0.743446992	0.760027794	0.764881436	0.765761771	0.789103367	0.781450808	0.781097405	0.778718555	0.800581443	0.818684102	0.82226017	0.824544293	0.856244594	0.890791177	0.899804014	0.94617957
15:11:19.334	0.830905698	0.848330135	0.743410815	0.760015948	0.764900636	0.765808218	0.78896234	0.781311064	0.780840911	0.778507508	0.800268786	0.818289294	0.821785515	0.824095031	0.855608925	0.890071786	0.899098555	0.945298341
15:11:20.285	0.831760494	0.849189829	0.743605991	0.760195788	0.76497708	0.765868208	0.789107501	0.781463752	0.780981144	0.778712671	0.800506999	0.818566921	0.822162944	0.824426643	0.856125337	0.890721054	0.899758138	0.946109325
15:11:21.235	0.829249726	0.851724099	0.743499251	0.760242983	0.765093226	0.765964585	0.7891718	0.781614778	0.78106224	0.778956826	0.800913178	0.819057855	0.82263041	0.82486546	0.856759082	0.891653464	0.900455831	0.947199999
15:11:22.272	0.831228428	0.847556575	0.743613435	0.760241408	0.765091197	0.766042511	0.789238148	0.781615693	0.781142995	0.778923576	0.800870233	0.818953041	0.822554759	0.82482877	0.856695711	0.891673038	0.900475859	0.947229957
15:11:23.222	0.831664492	0.852331498	0.743747123	0.760345379	0.765144368	0.765976207	0.789217769	0.781583737	0.78102889	0.778883817	0.800746102	0.81888582	0.822450737	0.824698714	0.856564553	0.891598025	0.900510796	0.947139576
15:11:24.173	0.829848215	0.847330194	0.743691856	0.760326555	0.765125864	0.765932683	0.789189701	0.781493106	0.780934856	0.778710709	0.800529377	0.81863151	0.822211688	0.82445786	0.856278592	0.891297701	0.900216004	0.946859033
15:11:25.123	0.831485597	0.844221256	0.743807185	0.760366935	0.765110558	0.766002025	0.789045581	0.781431931	0.780937555	0.778624212	0.800400434	0.818533364	0.822092132	0.824324583	0.856200541	0.891300422	0.900268584	0.946944666
15:11:26.160	0.828915352	0.845236353	0.743684513	0.760372876	0.765123382	0.76602149	0.788964454	0.781300349	0.780734485	0.778418434	0.800193354	0.818273224	0.821852325	0.824052675	0.855907739	0.891108773	0.900042933	0.946761755
15:11:27.110	0.828684133	0.849849345	0.743735162	0.760419767	0.765076771	0.765943851	0.788820983	0.781139529	0.780590343	0.778189834	0.799857379	0.817943535	0.82149953	0.823731153	0.855607631	0.890941954	0.899933855	0.946649225
15:11:28.061	0.830734964	0.847925594	0.743740488	0.760353615	0.765022178	0.765926835	0.788755366	0.781031519	0.780414703	0.778059213	0.799751014	0.817763496	0.821328265	0.823567673	0.855552858	0.891155634	0.900206847	0.946939133
15:11:29.098	0.830440481	0.844189605	0.743633217	0.760386657	0.765003823	0.765947619	0.788655519	0.780902378	0.780153873	0.777859452	0.799490021	0.817504856	0.821044513	0.823301218	0.855357034	0.891146483	0.900355785	0.947048542
15:11:30.048	0.829537409	0.845310574	0.743620212	0.76032548	0.764882778	0.765794282	0.788360464	0.780553855	0.779839896	0.777357349	0.79883164	0.816696346	0.820197188	0.822496179	0.854424869	0.890245753	0.899469286	0.94614791
15:11:30.998	0.830467552	0.84713123	0.743672952	0.760257999	0.764828152	0.765762849	0.788181521	0.780310543	0.779559197	0.777008798	0.798383392	0.816208089	0.819645369	0.821990056	0.853908936	0.889859514	0.899220771	0.945803254
15:11:32.035	0.83014336	0.845590915	0.743632545	0.760337955	0.764748866	0.765717771	0.788046872	0.780118206	0.779287793	0.776712951	0.797953685	0.815821194	0.819208121	0.821543702	0.853398772	0.889481451	0.898675472	0.945454297
15:11:32.986	0.8306836	0.845608952	0.743775094	0.760311841	0.764697783	0.76561583	0.787876285	0.779937403	0.779143299	0.776421889	0.797568773	0.815336881	0.818649989	0.820989241	0.852697777	0.88870236	0.897993588	0.944575352
15:11:33.936	0.829977824	0.848823936	0.743752327	0.76030068	0.764744674	0.76561685	0.787843594	0.779923096	0.779072571	0.776401918	0.797591378	0.81536382	0.81863519	0.820991653	0.852795434	0.888914745	0.898067928	0.9447826
15:11:34.886	0.831778855	0.851969687	0.74388467	0.760359428	0.764838855	0.765705922	0.787954231	0.78004498	0.779234301	0.776508524	0.797742097	0.815527579	0.818826306	0.821175245	0.852987777	0.889221491	0.898375349	0.945163214
15:11:35.923	0.830865512	0.851235582	0.743861091	0.760428735	0.764990761	0.765836011	0.788057948	0.780148282	0.779369796	0.776710593	0.797949974	0.815687247	0.819065543	0.821400951	0.85328794	0.889411003	0.898568844	0.945415894
15:11:36.874	0.830383544	0.848701285	0.744019539	0.760562648	0.765021635	0.765907421	0.78817568	0.780267351	0.77943353	0.776848736	0.798039156	0.815861539	0.819346274	0.821579409	0.853474939	0.889645998	0.898791553	0.945601127
15:11:37.824	0.830711853	0.845907091	0.744065985	0.760621733	0.765062575	0.765941571	0.788182472	0.780325002	0.779449251	0.776878097	0.798102974	0.815876408	0.819315528	0.821587167	0.853401889	0.889578087	0.898723999	0.945516267
15:11:38.861	0.831904407	0.847482012	0.744064109	0.76070052	0.765107463	0.766058181	0.78825699	0.780397757	0.779703357	0.776993755	0.798285057	0.816051292	0.819500104	0.821751029	0.853627224	0.889943056	0.89907787	0.945877412
15:11:39.811	0.832039485	0.846614468	0.744090149	0.760723517	0.765165585	0.766091599	0.788261752	0.780385089	0.779626517	0.776957991	0.798177045	0.816036062	0.819429514	0.821644116	0.853481973	0.889665522	0.89880022	0.945535357
15:11:40.762	0.830483109	0.844435499	0.744222577	0.760761416	0.765238066	0.766105352	0.788295891	0.780416045	0.779722218	0.776984612	0.798178233	0.816053531	0.819455059	0.821687587	0.853515831	0.889708252	0.898753075	0.94552684
15:11:41.798	0.829503683	0.846082454	0.74425953	0.76083461	0.765293681	0.766112265	0.788319069	0.780467237	0.779773111	0.777010002	0.798186451	0.816053637	0.819408151	0.821707111	0.853509862	0.889712413	0.898676086	0.945480662
15:11:42.749	0.830208555	0.850192489	0.74427368	0.760902527	0.765308556	0.76627738	0.788386527	0.780527892	0.779775662	0.777115641	0.798280768	0.816338492	0.819625905	0.821844444	0.853810171	0.890101596	0.899009154	0.94588177
15:11:43.699	0.831422799	0.84534626	0.744388021	0.760925669	0.765406949	0.766329107	0.788447966	0.780608896	0.779937326	0.777217227	0.798495818	0.816586961	0.819812566	0.822032309	0.85408219	0.890392673	0.899310052	0.946195288
15:11:44.736	0.83071816	0.845451396	0.74445265	0.760989714	0.765436203	0.76636876	0.788531873	0.780669203	0.780030278	0.777305129	0.798632878	0.816687688	0.819955895	0.822174755	0.854184077	0.890534371	0.899426429	0.946317276
15:11:45.686	0.8299427	0.841767323	0.744553737	0.761119917	0.765556206	0.766491929	0.788635438	0.780792413	0.780194842	0.777472246	0.798866625	0.816974446	0.820220597	0.822501195	0.854567473	0.890999235	0.899924435	0.946819024
15:11:46.637	0.829219818	0.843345999	0.744540325	0.761212929	0.765645732	0.766538	0.788687202	0.780816549	0.780302222	0.777515545	0.798859683	0.816911323	0.820206741	0.822490884	0.854482498	0.890804683	0.899798691	0.946508998
15:11:47.587	0.8295047	0.849933839	0.744655979	0.761283178	0.765711506	0.766667104	0.788795307	0.780962952	0.780419758	0.777692283	0.799145098	0.81720397	0.820436137	0.822815559	0.854903037	0.891254669	0.900326906	0.946997792
15:11:48.624	0.830696717	0.844497229	0.744735298	0.76135842	0.765804218	0.766688789	0.788895947	0.781090415	0.780616066	0.777807884	0.799246644	0.817407422	0.820552264	0.822958844	0.855063263	0.891403599	0.900313399	0.947056905
15:11:49.574	0.831533603	0.847396251	0.744772092	0.761375963	0.765817375	0.766825575	0.78891764	0.78115033	0.7806259	0.777910822	0.799294456	0.81748269	0.820568929	0.823060563	0.855155637	0.891410155	0.900229505	0.947012255
15:11:50.525	0.830130315	0.844782457	0.744826512	0.761501038	0.765889274	0.766790218	0.789003303	0.78121724	0.780696915	0.777991932	0.799369665	0.81748948	0.820607098	0.823094809	0.855052292	0.891096354	0.899850523	0.946589703
15:11:51.562	0.831448692	0.844877129	0.744965894	0.761579596	0.766044533	0.766848476	0.789178788	0.78140724	0.78094577	0.778226262	0.799641739	0.817769085	0.820950796	0.823456513	0.855452289	0.891484553	0.900177194	0.946924712
15:11:52.512	0.831879663	0.849950752	0.745128965	0.761705335	0.766135293	0.767134181	0.789391795	0.781618207	0.78122499	0.778495041	0.800103248	0.818144701	0.821415563	0.823894494	0.855922137	0.891941341	0.900653158	0.947351198
15:11:53.462	0.831151219	0.847030361	0.745101519	0.761722472	0.766258776	0.767223133	0.789541956	0.78182214	0.781501629	0.778792517	0.80039727	0.818507749	0.821888667	0.824284747	0.856341363	0.892291878	0.900858664	0.94760653
15:11:54.499	0.829433366	0.847586878	0.745283215	0.761867101	0.766345434	0.767281468	0.789688067	0.781886317	0.781659362	0.778915336	0.800572063	0.818721597	0.82205279	0.824420166	0.856448724	0.892195835	0.900727173	0.947345836
15:11:55.450	0.83035053	0.844920278	0.745363182	0.761970051	0.766524	0.767503639	0.789872246	0.782161239	0.781975691	0.779276278	0.800921801	0.81932725	0.822687294	0.825006599	0.857163191	0.892942452	0.901410209	0.948148696
15:11:56.400	0.830677809	0.846373224	0.745443195	0.762096542	0.766609146	0.767528948	0.789900669	0.782229762	0.782023421	0.779358125	0.801048172	0.819373992	0.822777834	0.825110949	0.857203397	0.892823952	0.901272218	0.94799871
15:11:57.350	0.831141354	0.852094231	0.745495396	0.762148553	0.766706619	0.767612605	0.790087424	0.782411794	0.782198886	0.779566762	0.801314797	0.819774887	0.823118723	0.82547304	0.857647977	0.893319079	0.901766473	0.948570554
15:11:58.387	0.832469754	0.85077452	0.745647482	0.762172834	0.766783265	0.767686082	0.790117285	0.782475596	0.782304818	0.779669293	0.801524645	0.819864875	0.823294304	0.825631568	0.857826512	0.893381262	0.901859575	0.948590139
15:11:59.338	0.831671694	0.845480766	0.745703246	0.762256124	0.7668387	0.76778014	0.790231846	0.782612143	0.782382139	0.779821759	0.801709354	0.820059505	0.823508484	0.82583005	0.857995196	0.893571985	0.901990216	0.948764549
15:12:00.288	0.830530161	0.84409469	0.74562964	0.762330388	0.766921378	0.767786707	0.790321139	0.782646962	0.782416174	0.779910594	0.801849163	0.820123237	0.823594878	0.825948519	0.85813272	0.893796508	0.902240569	0.948977376
15:13:15.802	0.831726275	0.846147516	0.74815728	0.764445217	0.767474221	0.768688399	0.78730973	0.778763469	0.777666224	0.773859123	0.794217963	0.811888164	0.814963613	0.81741054	0.850648685	0.890402698	0.89876258	0.946517742
15:13:16.838	0.832085263	0.838923437	0.748138903	0.76467154	0.767715984	0.768743039	0.787500729	0.778923826	0.777765873	0.774049493	0.794492893	0.812159882	0.815255835	0.8176669	0.850759677	0.89022496	0.898496092	0.946310128
15:13:17.789	0.833204571	0.841640858	0.748388722	0.764911341	0.767997336	0.769025527	0.787875643	0.779334694	0.778250788	0.774565436	0.795011047	0.812818883	0.815983812	0.818323947	0.851372703	0.8906743	0.898814649	0.946584755
15:13:18.739	0.832618528	0.842798916	0.748558228	0.765043202	0.768174441	0.769168196	0.788128506	0.779601629	0.778537188	0.774906103	0.795458695	0.813256888	0.816444928	0.81882007	0.851861312	0.891047632	0.89924062	0.946840056
15:13:19.776	0.831953387	0.840321295	0.748778774	0.765202115	0.768362358	0.769444277	0.788432875	0.779964716	0.778955544	0.77541303	0.796181088	0.813917329	0.817130303	0.819487542	0.852663089	0.891697293	0.899752849	0.947553573
15:13:20.726	0.831826618	0.841473471	0.748812183	0.765381972	0.768552224	0.769535019	0.788717359	0.780266884	0.779408419	0.775825019	0.796680627	0.814615618	0.817613174	0.82012631	0.853333717	0.892340309	0.900404117	0.948121557
15:13:21.677	0.833310237	0.838867352	0.748968058	0.765468395	0.768667489	0.7697807	0.788915239	0.780487887	0.779643263	0.776065742	0.796959831	0.814909752	0.817899354	0.820465675	0.85360072	0.892490631	0.90049197	0.948174168
15:13:22.627	0.831804298	0.843003221	0.749041046	0.765545398	0.768799264	0.769894494	0.78905539	0.780601342	0.779781835	0.776214429	0.797096358	0.815050454	0.81802911	0.820569173	0.853581212	0.892219931	0.900090663	0.947731178
15:13:23.664	0.833150292	0.8352059	0.749192498	0.765698898	0.768980085	0.770041865	0.789303263	0.780927646	0.780088604	0.77667595	0.797741525	0.81581765	0.818855569	0.821346068	0.854572259	0.893376545	0.901215103	0.948926411
15:13:24.614	0.83471964	0.845326118	0.749241775	0.765760314	0.769063973	0.770186605	0.789449073	0.781036304	0.780245207	0.776822034	0.797938116	0.816012933	0.818990592	0.821528491	0.854691932	0.893339041	0.901023171	0.948826078
15:13:25.565	0.83267277	0.842751752	0.749311702	0.765848111	0.769143627	0.77014446	0.789508315	0.78109936	0.780298111	0.776872502	0.797926571	0.816016643	0.819004381	0.821520855	0.854582424	0.893064461	0.90061222	0.948394497
15:13:26.602	0.831646194	0.840903804	0.749404919	0.7659543	0.769262055	0.770238296	0.789613523	0.781278791	0.780485455	0.7771024	0.798147556	0.816293572	0.819325009	0.821822233	0.854902654	0.893321669	0.90074066	0.948649345
15:13:27.552	0.832734809	0.839842846	0.749561847	0.766093041	0.769349591	0.770469063	0.789783974	0.781424701	0.780669011	0.77728039	0.798348285	0.816432978	0.819522836	0.821997223	0.854995995	0.893283243	0.900598792	0.948489303
15:13:28.502	0.833229176	0.841810912	0.749626981	0.766175909	0.769475754	0.770515879	0.789897189	0.781545156	0.780673315	0.777374937	0.798454771	0.816536685	0.819590143	0.822093717	0.855010641	0.893114973	0.900238952	0.948206819
15:13:29.539	0.833245307	0.840359801	0.749638531	0.766220044	0.769528465	0.770619805	0.7899277	0.781574535	0.780640622	0.777353614	0.798350068	0.816414859	0.819533198	0.821973814	0.854689759	0.892553961	0.899657009	0.947483587
15:13:30.490	0.833688787	0.84010689	0.749723496	0.766360302	0.76966797	0.770764205	0.790109216	0.78175281	0.780822089	0.77760621	0.798751738	0.81681487	0.819957794	0.822396241	0.855233757	0.893215886	0.900217662	0.948158582
15:13:31.440	0.833292707	0.841701303	0.74989381	0.766524869	0.769780423	0.770814613	0.790351774	0.782034005	0.781142076	0.777957635	0.799145569	0.817340462	0.820590913	0.822962733	0.85595476	0.893996066	0.901126025	0.949085668
15:13:32.477	0.832807772	0.840146133	0.750040659	0.766596024	0.769945086	0.771009876	0.790573269	0.782206345	0.781339542	0.778193843	0.799438875	0.817605015	0.820919598	0.8233035	0.856333221	0.89430579	0.90137841	0.949419708
15:13:33.427	0.835100125	0.835047248	0.750138081	0.766640219	0.770078586	0.771098592	0.790679642	0.782401544	0.781576339	0.778437267	0.799690971	0.817971269	0.821224348	0.823682439	0.856745209	0.894731105	0.901817876	0.949790165
15:13:34.378	0.833386089	0.842240748	0.750190827	0.766769649	0.770215637	0.771252335	0.790927735	0.782623284	0.781891975	0.778743875	0.800085858	0.818499173	0.821728487	0.824203442	0.857401993	0.895449571	0.902583413	0.950583652
15:13:35.328	0.833482404	0.838094413	0.75037169	0.766923923	0.770314088	0.771399971	0.791055335	0.782769614	0.782000024	0.778913623	0.800301826	0.818742843	0.82193027	0.824384542	0.857501467	0.895466589	0.902507811	0.950496213
15:13:36.365	0.83208568	0.840885096	0.750369734	0.767024628	0.770411237	0.771502041	0.791242333	0.782963955	0.782237094	0.779164102	0.800610684	0.819092372	0.822203615	0.824682027	0.857810672	0.895646561	0.902605551	0.950634935
15:13:37.315	0.836541526	0.844625192	0.75056648	0.767139835	0.770597526	0.77168659	0.791509421	0.783240522	0.782458134	0.779529979	0.801035396	0.819589513	0.822759761	0.825203098	0.85834365	0.896060882	0.903145912	0.951024907
15:13:38.266	0.833647904	0.839288425	0.75057903	0.767253353	0.770764657	0.771785445	0.791622531	0.78342836	0.782656736	0.779753379	0.801225108	0.819830766	0.822956125	0.825429202	0.858489399	0.895933364	0.902934352	0.950707053
15:13:39.302	0.833494799	0.841356915	0.750779283	0.767356406	0.770892477	0.771930363	0.791840562	0.783703916	0.782951691	0.780118712	0.801681058	0.820303789	0.823548367	0.825939495	0.858993778	0.896359702	0.903272816	0.951093648
15:13:40.253	0.833252924	0.84075299	0.7508964	0.767506161	0.77105452	0.772162391	0.792113771	0.783954772	0.783189515	0.780463815	0.802126968	0.82076447	0.824026111	0.826398609	0.859438046	0.896654969	0.90352304	0.951308986
15:13:41.203	0.834320963	0.843126301	0.750976875	0.767654377	0.771289508	0.772301356	0.79238592	0.78430759	0.783552848	0.7809125	0.802680028	0.821262618	0.824702968	0.827040266	0.86013091	0.897236147	0.903906173	0.951833061
15:13:42.240	0.832876789	0.841401001	0.751115396	0.767703263	0.771380647	0.772432876	0.792598012	0.784495677	0.783810744	0.781097153	0.802895056	0.821463848	0.824854397	0.827185924	0.860148055	0.89693125	0.903413482	0.951352111
15:13:43.190	0.832258395	0.841243789	0.75116205	0.767925657	0.771571756	0.772634877	0.792836841	0.784799744	0.784167073	0.781535978	0.803396156	0.822173798	0.82543366	0.827850946	0.860892555	0.897680662	0.904068317	0.952085971
15:13:44.141	0.835731786	0.841690447	0.751267599	0.767966107	0.771715791	0.772725745	0.793032424	0.784969341	0.784366132	0.781751776	0.803642721	0.822486421	0.825691556	0.82815098	0.861171637	0.897783048	0.904174565	0.95210455
15:13:45.091	0.835359375	0.838530963	0.751348817	0.768098603	0.771855631	0.772914867	0.793228616	0.785206436	0.784617671	0.782067099	0.804081746	0.822920334	0.826074543	0.828625612	0.861708163	0.898388105	0.904561435	0.952603911
15:13:46.128	0.833077365	0.84475552	0.751570591	0.768246777	0.771972863	0.773091835	0.793421599	0.785451557	0.784990236	0.782367925	0.804408307	0.823229284	0.826466231	0.829041983	0.862168751	0.898754123	0.90487408	0.952909
15:13:47.078	0.834488517	0.841733311	0.751633405	0.768361611	0.772121722	0.773188106	0.793584938	0.785628074	0.78518139	0.782596352	0.804673615	0.823553983	0.826824238	0.829349969	0.862435844	0.898902798	0.905160857	0.953009112
15:13:48.115	0.834992185	0.843850454	0.751730996	0.768465746	0.772242772	0.773332174	0.793795857	0.785823629	0.785436334	0.782844794	0.805066529	0.823897887	0.827259445	0.82974762	0.862903504	0.899433799	0.905570571	0.953556233
15:13:49.066	0.835049941	0.841112015	0.751795654	0.768507452	0.772300807	0.77339724	0.793822827	0.785894205	0.785494012	0.782933264	0.805185232	0.823929963	0.827269966	0.829751018	0.862828344	0.89920969	0.905285696	0.95326016
15:13:50.016	0.835553323	0.841872119	0.751920164	0.768624396	0.772458543	0.773570469	0.794042045	0.786125797	0.785725511	0.783190041	0.805585208	0.82438394	0.827738754	0.830167022	0.863368293	0.899840271	0.905889082	0.953884861
15:13:50.966	0.836030245	0.841036823	0.752023865	0.768777783	0.772546517	0.773505665	0.794093717	0.786186084	0.785824586	0.783209718	0.805599122	0.824348582	0.827704809	0.830141635	0.863218921	0.899555099	0.905557061	0.953466028
15:13:52.003	0.835233554	0.839847427	0.752048606	0.768822383	0.772665608	0.773729462	0.794262063	0.786300069	0.78595284	0.783368167	0.805742943	0.824492434	0.827862676	0.830334622	0.863369539	0.899653192	0.905688868	0.953579533
15:13:52.954	0.834783678	0.841767535	0.752226629	0.768924657	0.772702488	0.773855845	0.794374671	0.786414743	0.785933187	0.783479039	0.805891555	0.824547044	0.827988859	0.830459947	0.863444161	0.899694036	0.905786598	0.953622851
15:13:53.904	0.834023198	0.838282791	0.752288019	0.769012146	0.772826181	0.773955433	0.794500066	0.78656068	0.786174496	0.783689354	0.806038502	0.824803773	0.828209813	0.830689253	0.863703345	0.899823355	0.905819834	0.953750796
15:13:54.854	0.834497191	0.842935717	0.752363779	0.769080603	0.772967014	0.774010753	0.794540282	0.786663527	0.786267254	0.783766826	0.806110664	0.824796087	0.828207597	0.83064816	0.86352632	0.899448013	0.905268077	0.953133164
15:13:55.891	0.836211366	0.842800638	0.752415112	0.769238612	0.77313862	0.774201308	0.794818977	0.786930208	0.786603566	0.784106438	0.806417793	0.82534045	0.828724572	0.831126287	0.864132493	0.900004299	0.90575666	0.953738176
15:13:56.842	0.835375052	0.847249619	0.752564083	0.769397341	0.773353659	0.774384769	0.795156919	0.787277338	0.787010451	0.784621486	0.807168277	0.826166318	0.829430638	0.831994969	0.865191356	0.901287488	0.907210708	0.955139653
15:13:57.792	0.834722949	0.841079904	0.752787498	0.769516018	0.773468294	0.774481137	0.795354769	0.787478928	0.787323012	0.784836735	0.807380172	0.826434456	0.829679136	0.832275003	0.865432328	0.901411102	0.907198346	0.955181135
15:13:58.829	0.835833326	0.846387282	0.752846392	0.76951822	0.773476301	0.77464381	0.795348143	0.787507804	0.787275884	0.784821407	0.807329455	0.826227676	0.829502758	0.832093602	0.865011237	0.900672139	0.906292294	0.954162223
15:13:59.779	0.833841562	0.847715896	0.752890034	0.769648472	0.773624928	0.774780827	0.795502242	0.787732244	0.787450453	0.785107074	0.807703317	0.82662287	0.829867872	0.832475712	0.865414138	0.900958257	0.906498937	0.954443749
15:15:15.466	0.842146761	0.835982771	0.754776121	0.771128297	0.772991743	0.774145379	0.789813736	0.780114343	0.778293428	0.773768617	0.793424121	0.811246346	0.814491789	0.816893064	0.850569355	0.891954435	0.898246212	0.947919332
15:15:16.416	0.83614083	0.839957284	0.754788834	0.771214469	0.773019897	0.774119409	0.789931185	0.78035509	0.778692961	0.774110815	0.794054699	0.811719989	0.814964353	0.817375336	0.851190502	0.892510476	0.899081803	0.9485326
15:15:17.366	0.836081366	0.844364752	0.755136682	0.771562172	0.773411471	0.774507104	0.790483011	0.780915274	0.779253158	0.774850522	0.795024037	0.812838755	0.816020008	0.818355641	0.852321716	0.893569503	0.900142242	0.949516875
15:15:18.403	0.835516008	0.838321171	0.755316269	0.77175836	0.773669596	0.774819643	0.790834069	0.781369461	0.779662291	0.775406755	0.79558335	0.813506229	0.816605469	0.819118867	0.852929737	0.893782507	0.900431939	0.949529393
15:15:19.354	0.835175363	0.838071737	0.755505216	0.771975722	0.773987179	0.775117269	0.791403283	0.78205892	0.780515086	0.776340134	0.79685644	0.814770941	0.817817136	0.820401489	0.854178726	0.89463511	0.901087448	0.950064689
15:15:20.304	0.836275235	0.836407356	0.755896593	0.772378146	0.774525928	0.775613234	0.792282842	0.78308507	0.781707125	0.777728081	0.798493066	0.816737161	0.819852008	0.822431867	0.856335968	0.896549471	0.902888551	0.951832344
15:15:21.254	0.837087387	0.843886684	0.756063337	0.772715771	0.774965133	0.776067273	0.793038871	0.783963057	0.782728864	0.778892186	0.799880051	0.81828151	0.821413402	0.823941519	0.857718954	0.897332154	0.903613024	0.952303399
15:15:22.291	0.837566413	0.84004707	0.756440944	0.773106028	0.775519108	0.776569714	0.793983765	0.785013683	0.783912762	0.780306012	0.80164283	0.820121324	0.823227402	0.825868891	0.859691679	0.898719749	0.904850229	0.953521942
15:15:23.242	0.835274585	0.838269879	0.756776532	0.77341155	0.77604236	0.777179057	0.794845856	0.786042428	0.785180168	0.781666675	0.803200046	0.821893732	0.825179306	0.827714505	0.861535124	0.900092707	0.905975554	0.954688751
15:15:24.192	0.838263414	0.839990393	0.757027181	0.773724841	0.776488797	0.777634652	0.795540095	0.786864299	0.786013331	0.782723726	0.804435654	0.823368206	0.826572267	0.829044249	0.862759143	0.900712795	0.906343079	0.954970626
15:15:25.229	0.836257578	0.837968743	0.757406423	0.774032386	0.776929007	0.778060228	0.796290475	0.787742656	0.787006785	0.783898033	0.805900783	0.824978887	0.828159953	0.830729855	0.864519841	0.902198831	0.90759903	0.956197616
15:15:26.179	0.838013024	0.842308066	0.757577247	0.774282179	0.777276943	0.778354085	0.796914841	0.788397806	0.787683528	0.784790032	0.806953646	0.826066068	0.829390918	0.831945684	0.865687925	0.902999912	0.908283164	0.956797321
15:15:27.130	0.838683335	0.844241811	0.757933745	0.774542189	0.777593749	0.778717964	0.797409761	0.788968795	0.788358613	0.785563415	0.807923292	0.827197701	0.830596784	0.833076986	0.866910834	0.904028054	0.909198168	0.957776176
15:15:28.166	0.839176745	0.844507249	0.757911847	0.774701259	0.777743593	0.778913075	0.797620579	0.78919077	0.788577823	0.785836459	0.808211979	0.827461382	0.830814594	0.833319265	0.867050326	0.903890125	0.909040514	0.957396993
15:15:29.117	0.839432577	0.840564754	0.758038918	0.774773945	0.777811187	0.77898245	0.79772985	0.789358063	0.788751584	0.786026859	0.808442936	0.827706392	0.831103213	0.833571823	0.867258051	0.90395393	0.9088469	0.957440278
15:15:30.067	0.837779935	0.845237623	0.758136518	0.77480949	0.777900227	0.779013115	0.797788982	0.789413205	0.788818375	0.786069648	0.808506265	0.827708608	0.831107052	0.83356118	0.867213016	0.903750636	0.908780732	0.957191422
15:15:31.018	0.839833259	0.846053326	0.758219587	0.774949957	0.778009608	0.77917885	0.797933306	0.789539446	0.789002207	0.78623751	0.80886657	0.828037872	0.831377424	0.833857854	0.867548151	0.904199484	0.909045371	0.957638087
15:15:32.054	0.839961916	0.845445251	0.758281995	0.774969157	0.778054756	0.77915337	0.797895663	0.789552084	0.788952399	0.786201792	0.808781705	0.82793063	0.831210649	0.833720801	0.867326761	0.903854702	0.908660894	0.957224613
15:15:33.005	0.839644206	0.841267523	0.758308802	0.775001663	0.778119323	0.779308678	0.797987909	0.789617721	0.788995907	0.786264978	0.808844719	0.827941601	0.831296121	0.83376602	0.867365804	0.903787088	0.908582601	0.957175102
15:15:33.955	0.838132454	0.845004435	0.758465664	0.775162236	0.778298273	0.779433304	0.798253917	0.789899844	0.789294625	0.786692826	0.809309605	0.828562534	0.83190662	0.834472183	0.868223412	0.90482516	0.909718246	0.958249606
15:15:34.992	0.838861243	0.844734912	0.758517889	0.7753146	0.778488556	0.779638187	0.798508665	0.790164989	0.789637348	0.787028799	0.809739262	0.82895499	0.832343295	0.834916382	0.868684569	0.905080878	0.909966975	0.958492958
15:15:35.942	0.839542522	0.840498664	0.758725572	0.775547112	0.778721361	0.779833068	0.79885834	0.790536262	0.790015708	0.787529829	0.81033184	0.829587056	0.833019544	0.835640263	0.86942986	0.905654615	0.910504644	0.958953326
15:15:36.893	0.84045934	0.848011256	0.758970907	0.775684071	0.778953435	0.780103929	0.799166212	0.790941767	0.790497113	0.788042601	0.810995586	0.830322756	0.833721374	0.836331767	0.870033862	0.905965435	0.910788451	0.959098255
15:15:37.930	0.838678197	0.842340977	0.759082832	0.775908649	0.779212326	0.780365827	0.799687139	0.791514587	0.79116712	0.78881148	0.811978896	0.831357533	0.834844687	0.837379802	0.871111588	0.906771671	0.911516821	0.95979236
15:15:38.880	0.838664957	0.842295424	0.759221076	0.776087172	0.779537979	0.780657982	0.800140348	0.792050406	0.791757134	0.789504002	0.812875316	0.832255228	0.83572815	0.838266505	0.871911778	0.90721861	0.911882048	0.960014971
15:15:39.830	0.840511454	0.844468868	0.759619122	0.77636321	0.779916444	0.781057731	0.800753951	0.792694869	0.792487024	0.79032401	0.813801323	0.833336062	0.836878174	0.83939861	0.873048822	0.90807683	0.912669224	0.96079665
15:15:40.867	0.838636041	0.842718902	0.759764839	0.776597524	0.780229262	0.781429072	0.801239477	0.793307579	0.79314473	0.791121339	0.814739172	0.834341787	0.837736741	0.84045144	0.874036255	0.908816643	0.91320661	0.961212742
15:15:41.818	0.840401892	0.847249341	0.760016392	0.776821565	0.78058061	0.78172984	0.801810098	0.79392435	0.793915791	0.791952471	0.815647259	0.83546465	0.83890208	0.841503434	0.875097647	0.909616065	0.913946429	0.961847446
15:15:42.768	0.838717362	0.843973078	0.760285871	0.777140493	0.78091745	0.782082215	0.802350688	0.794563707	0.794489022	0.792785526	0.816656465	0.836658144	0.840004571	0.842625341	0.876228972	0.910391428	0.914715713	0.962516425
15:15:43.718	0.841389196	0.843251789	0.760500502	0.777305593	0.781195661	0.782365003	0.802804757	0.795085586	0.795113965	0.793487742	0.817546098	0.837517406	0.841053086	0.843601427	0.87718595	0.91105052	0.915257493	0.963083457
15:15:44.755	0.840249083	0.845448584	0.760616171	0.77753235	0.78144012	0.782583717	0.803180285	0.795537583	0.795465066	0.794049919	0.81810854	0.838253987	0.841795225	0.844323881	0.87788642	0.911437264	0.915521627	0.963364861
15:15:45.706	0.83950139	0.84746639	0.760793747	0.777660767	0.781529844	0.782779575	0.80339537	0.795690216	0.795646761	0.794256317	0.81838334	0.8384618	0.841968296	0.844536059	0.877924324	0.911237463	0.91527203	0.962990619
15:15:46.656	0.841436111	0.845609931	0.760940067	0.777819284	0.781728856	0.78295164	0.803606756	0.79598543	0.796040112	0.794625776	0.818889044	0.838964338	0.842397754	0.845099896	0.878620855	0.911985987	0.915872383	0.963733375
15:15:47.693	0.84146363	0.845097556	0.76095678	0.777820536	0.781739798	0.782916522	0.803558683	0.795887876	0.795849028	0.794487673	0.81867795	0.838736367	0.842256995	0.844863171	0.878275615	0.911551091	0.915426759	0.963253211
15:15:48.643	0.841050928	0.845750599	0.760980271	0.777900571	0.781817822	0.783023787	0.803638786	0.796007741	0.795982229	0.794609639	0.818891679	0.838836113	0.84235152	0.84508949	0.878652832	0.912143265	0.915915949	0.963957873
15:15:49.594	0.840396783	0.842665947	0.761042714	0.777948326	0.78183321	0.783040132	0.803551305	0.795915904	0.795952582	0.794474312	0.818731779	0.838751309	0.842164091	0.844909599	0.878563175	0.912209658	0.915952583	0.964099182
15:15:50.630	0.841203798	0.8446748	0.760993411	0.777930668	0.781781362	0.782925452	0.803376915	0.795689892	0.795663875	0.794132686	0.818252633	0.838287551	0.841745838	0.844443687	0.878044252	0.911795323	0.915562847	0.963674117
15:15:51.581	0.842156613	0.846923434	0.761102351	0.77792332	0.78173503	0.782906793	0.803257565	0.795477987	0.795336252	0.793830082	0.817849691	0.837915724	0.84134689	0.84397507	0.877507931	0.911245056	0.914997385	0.963094056
15:15:52.531	0.841028146	0.850601908	0.761116681	0.777905001	0.781680848	0.782906361	0.803118616	0.795303508	0.79520492	0.793544902	0.817457652	0.837446048	0.840945131	0.843501821	0.876932452	0.910561253	0.914346357	0.962394518
15:15:53.482	0.841244215	0.844516449	0.761177309	0.777937287	0.781684213	0.782917901	0.803125148	0.795228176	0.795076758	0.793427747	0.817336915	0.837272142	0.840740241	0.843295642	0.876714509	0.910304667	0.914056655	0.962117411
15:15:54.518	0.841541718	0.840240266	0.761243245	0.778032108	0.781740435	0.782967011	0.803145366	0.795321926	0.795245834	0.793548612	0.817521583	0.837393765	0.840900686	0.843522879	0.877014013	0.910756292	0.914537076	0.962641294
15:15:55.469	0.840769516	0.842146574	0.761233192	0.778137017	0.781917955	0.783025383	0.803305156	0.795464913	0.795464172	0.793773782	0.817783976	0.837728079	0.841221129	0.843907775	0.877444317	0.911246855	0.915067957	0.963133955
15:15:56.419	0.839239624	0.843617493	0.761353775	0.778264388	0.782048596	0.783151579	0.803509702	0.79567079	0.795603478	0.794021632	0.818078739	0.838091423	0.841556333	0.844304884	0.877860988	0.911625906	0.915434068	0.963462251
15:15:57.456	0.842462747	0.845633953	0.761534266	0.77838085	0.782179397	0.783337192	0.803669192	0.795851764	0.795896688	0.794205829	0.81822666	0.838326511	0.841808205	0.844510012	0.8779938	0.911607485	0.915475015	0.963415607
15:15:58.406	0.839643872	0.847350214	0.761674539	0.778467572	0.782357043	0.783480016	0.803876111	0.796101347	0.796123647	0.794494896	0.818624169	0.838784615	0.84232054	0.844945734	0.878457735	0.911954793	0.915925569	0.963738279
15:15:59.357	0.841973254	0.849525654	0.761692849	0.778656834	0.782507245	0.783751653	0.8042419	0.796430611	0.796511004	0.794911349	0.819169152	0.839424357	0.842822856	0.845481831	0.87902317	0.912373993	0.916269121	0.964040947
15:16:00.394	0.841012374	0.84315269	0.761941267	0.778859213	0.782712187	0.783882857	0.8044697	0.796702366	0.796809001	0.795273702	0.819555751	0.839772415	0.843229998	0.845894301	0.87938295	0.912515564	0.916310207	0.964107306
15:17:15.821	0.843736759	0.840126792	0.766182215	0.782712011	0.785419206	0.786867112	0.804267369	0.795530859	0.79465178	0.792217244	0.815368442	0.83478312	0.838091427	0.840833419	0.874576034	0.910129486	0.915421642	0.96263378
15:17:16.858	0.845764225	0.847534515	0.766035176	0.782716078	0.785366813	0.786587782	0.804114914	0.79543484	0.794575398	0.791946181	0.81498867	0.834362127	0.837807243	0.840346736	0.874060185	0.909451205	0.914299065	0.961917972
15:17:17.808	0.847286501	0.85020763	0.766105377	0.782833236	0.785450718	0.786594008	0.80412738	0.795412306	0.79459583	0.791872252	0.814835911	0.834250942	0.837620374	0.840217203	0.873915466	0.909321736	0.914092978	0.961840286
15:17:18.758	0.845637748	0.848755596	0.766224244	0.782980588	0.785515396	0.786712717	0.804175243	0.795415974	0.794564448	0.791864283	0.81488523	0.834249379	0.837716318	0.840273314	0.874068256	0.909715804	0.914378631	0.962339193
15:17:19.795	0.844486394	0.850314784	0.76614319	0.782923534	0.785413953	0.786634512	0.803956481	0.795222085	0.794336655	0.791563156	0.814487459	0.833743711	0.837185726	0.839738929	0.873456291	0.909095881	0.913807973	0.961724194
15:17:20.746	0.84678731	0.84719115	0.766269705	0.782947092	0.785488866	0.786720429	0.803977073	0.795157403	0.794315233	0.791482293	0.81435665	0.833699464	0.83707106	0.839609639	0.873452382	0.909241697	0.913931955	0.961934622
15:17:21.696	0.845254249	0.847310526	0.766396114	0.783003328	0.785462388	0.786661227	0.803973047	0.795055589	0.794171827	0.791330216	0.814233849	0.833458111	0.83695161	0.839497759	0.873308735	0.909240117	0.913911871	0.962009558
15:17:22.733	0.847682325	0.849521403	0.766494299	0.783035606	0.785494698	0.786739916	0.803853334	0.7949771	0.7940922	0.791209917	0.814045706	0.833335223	0.836740226	0.839303048	0.873177567	0.909186871	0.913861393	0.961981428
15:17:23.683	0.845482745	0.848606738	0.766399194	0.783089679	0.785490049	0.786784151	0.803864106	0.794927853	0.794071987	0.79112219	0.813975856	0.833203927	0.836664635	0.839211109	0.873089771	0.909202914	0.913946472	0.961983703
15:17:24.634	0.84488103	0.84873178	0.766511192	0.783133897	0.785582003	0.78679089	0.803901221	0.794985599	0.794087487	0.791196674	0.814034403	0.833370853	0.836829916	0.839346558	0.873272155	0.909355099	0.914083076	0.962214239
15:17:25.670	0.845082074	0.844624092	0.766649777	0.783243663	0.785705185	0.786935323	0.804030425	0.795118928	0.794176945	0.791325387	0.814177961	0.833500483	0.836947518	0.839497795	0.873374662	0.909417232	0.914186022	0.962196802
15:17:26.621	0.845983029	0.845112506	0.766646653	0.783355995	0.785833033	0.787008766	0.80416449	0.795278364	0.794399907	0.791514075	0.814322446	0.833757745	0.837237003	0.839773757	0.873651025	0.909601504	0.914450089	0.962372519
15:17:27.571	0.84686266	0.852040897	0.766742116	0.783535808	0.785990411	0.787219447	0.804390236	0.795508604	0.794550073	0.791792774	0.814688337	0.834148515	0.837673683	0.840136265	0.874091657	0.90993993	0.914716058	0.96269689
15:17:28.522	0.845896792	0.849071259	0.767026144	0.783622583	0.78612583	0.787409647	0.804574109	0.79570775	0.794938348	0.792049408	0.815041379	0.834397783	0.837872519	0.840401204	0.874302998	0.910081352	0.914819617	0.962679734
15:17:29.558	0.845904905	0.846408416	0.767049705	0.783825794	0.786360231	0.787497794	0.804823178	0.796030851	0.795299331	0.792460577	0.815619657	0.835005235	0.838459049	0.840984942	0.874906362	0.910686686	0.915562308	0.963284004
15:17:30.509	0.844833851	0.844818063	0.767226406	0.784017102	0.786485978	0.787675676	0.805055838	0.796269941	0.795434444	0.79271048	0.815930725	0.835235586	0.838708394	0.841242803	0.875060174	0.910657592	0.915476846	0.963177985
15:17:31.459	0.847356423	0.846784482	0.767413594	0.784046408	0.786643409	0.787908911	0.805234274	0.796492055	0.795660125	0.792974914	0.816147998	0.835495989	0.838943073	0.841504275	0.875272005	0.910788038	0.915524537	0.963214473
15:17:32.496	0.846612468	0.849160326	0.767426775	0.784199687	0.786767699	0.787925993	0.805376785	0.796635689	0.795845353	0.793118964	0.816322331	0.835576601	0.83899106	0.841618626	0.875279644	0.910676065	0.915362293	0.963047888
15:17:33.446	0.84695556	0.848920039	0.767584066	0.784295544	0.786859449	0.788107713	0.805487867	0.796718788	0.795916611	0.793243016	0.816442486	0.835686416	0.839121378	0.841721964	0.875328538	0.910591455	0.915208115	0.962898874
15:17:34.397	0.846424128	0.849720164	0.767598067	0.784421134	0.786980765	0.788168465	0.805558376	0.796846526	0.796017985	0.793363149	0.816559968	0.835918274	0.839315708	0.841889043	0.875552816	0.910859079	0.915489922	0.963137276
15:17:35.434	0.844428734	0.848274256	0.767725504	0.78445012	0.787018422	0.788208668	0.805685615	0.796884287	0.796096036	0.793422038	0.816535806	0.835902227	0.839348998	0.84192498	0.875584418	0.910839858	0.915427237	0.963186222
15:17:36.384	0.844940595	0.848073678	0.767856346	0.784516002	0.787095561	0.788389682	0.80578525	0.796956508	0.796135465	0.793480739	0.816607941	0.835990971	0.839406766	0.842055561	0.875782139	0.911189511	0.915688451	0.963484442
15:17:37.334	0.845681083	0.846231845	0.767828532	0.784582433	0.787109011	0.788377707	0.805702919	0.796849591	0.796054564	0.793344772	0.816413887	0.835796294	0.839170428	0.841788076	0.875501275	0.910894427	0.915463131	0.963174989
15:17:38.285	0.848086834	0.846233242	0.767823533	0.784614229	0.787102825	0.788375611	0.805638656	0.796779264	0.795972241	0.793219676	0.816263054	0.835668626	0.839065301	0.841641459	0.875367662	0.910856973	0.915520503	0.963154905
15:17:39.322	0.846349658	0.847430141	0.76786928	0.784607735	0.787084658	0.788315229	0.805500005	0.796615796	0.795800501	0.792982368	0.816001416	0.835363354	0.838727713	0.841321614	0.875031361	0.91049501	0.915284765	0.962821012
15:17:40.272	0.846281316	0.848925625	0.76786091	0.784635141	0.787080077	0.788310623	0.805494674	0.796547367	0.795686678	0.792866593	0.815881998	0.835163456	0.838622274	0.841203094	0.874943621	0.910564862	0.91539591	0.962993768
15:17:41.222	0.847755187	0.848517159	0.76786638	0.784666918	0.787039415	0.788250126	0.805412311	0.796415707	0.795516224	0.792680204	0.815623428	0.834948831	0.838350976	0.840939829	0.874702202	0.910293129	0.915186571	0.962773183
15:17:42.259	0.846709831	0.849026591	0.767960137	0.78468006	0.787076438	0.788277005	0.805323562	0.796378409	0.795435679	0.792580774	0.815464444	0.83482571	0.838194701	0.840792958	0.874563355	0.910296289	0.915229106	0.962766414
15:17:43.210	0.846289342	0.848754528	0.767907059	0.784718831	0.787067153	0.788326546	0.805291307	0.796276988	0.795357211	0.792457515	0.81534213	0.834633459	0.838037198	0.840558868	0.874352367	0.91011377	0.915118756	0.962601652
15:17:44.160	0.845925114	0.849592423	0.767972288	0.784788549	0.787121067	0.78828524	0.805204455	0.796225624	0.79531312	0.792373148	0.815235817	0.834584357	0.837909293	0.840495331	0.874307304	0.910180552	0.91520714	0.962670264
15:17:45.197	0.847544184	0.849653881	0.768167677	0.784773881	0.787137381	0.788351893	0.805220386	0.796226279	0.795245839	0.792362414	0.815207256	0.834570312	0.83795261	0.840495066	0.874340958	0.910261556	0.915341563	0.962820776
15:17:46.147	0.84595895	0.849866478	0.768204816	0.784837807	0.787174505	0.788369874	0.805206078	0.79622237	0.795303424	0.79232079	0.815207022	0.834509925	0.837891322	0.840483136	0.874392917	0.91029376	0.915431904	0.962922769
15:17:47.098	0.846948837	0.84870368	0.768260656	0.784912939	0.787183533	0.788428958	0.80523873	0.796184539	0.795326183	0.792297947	0.815146064	0.834372657	0.837834114	0.840433487	0.874335188	0.910312681	0.915512402	0.962912479
15:17:48.048	0.846608912	0.848918516	0.768193356	0.784927562	0.787205027	0.788480692	0.805218741	0.796125647	0.795138958	0.792172956	0.814964901	0.834274218	0.837645058	0.840261708	0.874171812	0.910160138	0.915350671	0.962820312
15:17:49.085	0.846321398	0.848664358	0.768288025	0.784979111	0.787165203	0.788473457	0.805122597	0.796038454	0.795110564	0.792073673	0.814829788	0.83407533	0.837454692	0.840025461	0.873907252	0.909923946	0.91507783	0.962478834
15:17:50.035	0.847953361	0.850384929	0.768270844	0.785009574	0.787199835	0.788404527	0.805090574	0.795986274	0.795026388	0.791959275	0.814699062	0.833882969	0.837289555	0.839863951	0.873699771	0.909670524	0.91478645	0.962233541
15:17:50.986	0.846674229	0.849308344	0.768332111	0.785106597	0.7872166	0.788485236	0.805102926	0.795951222	0.794924743	0.79187399	0.814535967	0.833673099	0.837067667	0.839662294	0.873384612	0.909272827	0.914345503	0.961749755
15:17:52.022	0.847865163	0.849206906	0.768464746	0.785176553	0.787290382	0.788593095	0.80514163	0.796037712	0.794984155	0.791990516	0.814674489	0.833783102	0.837193429	0.839812696	0.873565432	0.909445417	0.914568425	0.962024145
15:17:52.973	0.848327655	0.850149592	0.768527034	0.785299044	0.787392263	0.788655329	0.805274794	0.796146895	0.795123256	0.792128624	0.81493284	0.834049752	0.837423682	0.840068551	0.873902869	0.909862315	0.915061057	0.962459709
15:17:53.923	0.847046691	0.851177804	0.768587157	0.785380325	0.787464355	0.788702335	0.805309815	0.796182033	0.795141179	0.792149701	0.814909767	0.834123126	0.837450813	0.840065551	0.873869787	0.909800121	0.915011767	0.962373215
15:17:54.874	0.848300769	0.846525675	0.768711319	0.785412886	0.787563639	0.788797852	0.805356108	0.796262545	0.795249413	0.792229176	0.814980813	0.834209834	0.837594306	0.84018354	0.87405923	0.910039743	0.915331164	0.962654129
15:17:55.910	0.848682618	0.852212857	0.768726858	0.785483209	0.787639848	0.788866245	0.805451091	0.796325163	0.79527832	0.792324746	0.815077914	0.83442304	0.837814766	0.840272589	0.874380895	0.910518891	0.915752803	0.963174954
15:17:56.861	0.847350126	0.84879481	0.768815547	0.785433966	0.78757201	0.788829334	0.805285241	0.796135662	0.795171239	0.792039751	0.814746424	0.833912869	0.837279968	0.839581185	0.873760511	0.909822581	0.915103961	0.962450451
15:17:57.898	0.848140647	0.851600475	0.768724167	0.785400673	0.78754559	0.788773621	0.805119457	0.795951051	0.794929536	0.791825293	0.814438175	0.833646588	0.836947746	0.839243065	0.873445675	0.909582518	0.914841129	0.962248152
15:17:58.848	0.848846233	0.848382238	0.768706423	0.785403456	0.787514893	0.788719869	0.805018907	0.795841956	0.794773755	0.791617823	0.814245038	0.833368719	0.836745521	0.838989162	0.873222177	0.90945977	0.914675818	0.962138336
15:17:59.798	0.849128488	0.852351291	0.768830936	0.785414906	0.787520693	0.788733014	0.804947985	0.795737895	0.79460282	0.791479415	0.814058517	0.833229894	0.836528425	0.838816087	0.873086542	0.909444577	0.914690287	0.962177579
15:19:15.571	0.847664739	0.868021137	0.772366765	0.789172855	0.789997271	0.791223677	0.804854063	0.794886847	0.792974731	0.789244114	0.811106233	0.830090493	0.833530301	0.836015183	0.870609993	0.908769199	0.913987033	0.961875513
15:19:16.522	0.85176257	0.84933307	0.772810658	0.789130938	0.789965499	0.791221227	0.804667194	0.794566027	0.79274887	0.788783022	0.810395043	0.829351049	0.832624177	0.834963726	0.869681645	0.907647708	0.912726664	0.96080533
15:19:17.558	0.851647171	0.85195895	0.772933207	0.789152816	0.789904423	0.791207544	0.80443055	0.794228507	0.792478021	0.788346251	0.809847012	0.828845962	0.832135444	0.83438246	0.869305192	0.907599626	0.912812683	0.961005597
15:19:18.509	0.85214696	0.849238096	0.772848244	0.789101017	0.789768053	0.791001646	0.804049988	0.793769417	0.791827634	0.787672882	0.809044349	0.828031657	0.831189287	0.833525385	0.868389027	0.906895196	0.91203032	0.960352679
15:19:19.459	0.852064501	0.851521655	0.772711125	0.789054323	0.789566902	0.790813367	0.803711957	0.793337195	0.791466338	0.787127095	0.808313298	0.827277517	0.83047749	0.832822198	0.867778367	0.906705231	0.912023925	0.960321877
15:19:20.496	0.850640022	0.85283398	0.772740624	0.788930727	0.789394326	0.790629351	0.803261328	0.792882562	0.790835096	0.786466011	0.807613252	0.826419512	0.829649751	0.831819588	0.867007576	0.906258332	0.911498795	0.960044073
15:19:21.446	0.850674893	0.855162375	0.772604951	0.788746513	0.789143628	0.790433464	0.802819586	0.792361103	0.790291431	0.785704364	0.806708677	0.825460204	0.828638164	0.830978672	0.86592068	0.905333496	0.910600839	0.95923657
15:19:22.397	0.852245763	0.851457183	0.772457602	0.788656496	0.788951974	0.790128867	0.802447706	0.79187053	0.789747311	0.785083617	0.805888209	0.82452316	0.827848809	0.830129392	0.865082831	0.904692039	0.910065251	0.958799762
15:19:23.347	0.8516223	0.849659354	0.772580077	0.788582451	0.788752478	0.790029237	0.802144569	0.791458445	0.789242833	0.784527396	0.805256366	0.823875717	0.827068398	0.829414958	0.864390227	0.904200493	0.909689852	0.95838387
15:19:24.384	0.851358876	0.850263316	0.77246055	0.788525542	0.78867627	0.78996694	0.801833112	0.791117842	0.78882493	0.78405595	0.804726622	0.823221322	0.826399437	0.828695026	0.863722165	0.903593835	0.909133623	0.957927129
15:19:25.334	0.849891183	0.853662132	0.772434497	0.788527084	0.788633942	0.7899925	0.801697863	0.790931501	0.788689456	0.783810674	0.804384301	0.822926412	0.826087958	0.828380253	0.863489864	0.903577844	0.909099987	0.957978498
15:19:26.285	0.851967127	0.850965561	0.772383064	0.788509662	0.788543435	0.789831792	0.80147968	0.790725952	0.788372682	0.783460276	0.803980529	0.822395276	0.825553085	0.827830592	0.862808993	0.902891122	0.908402522	0.957232752
15:19:27.322	0.850595687	0.851640779	0.772477058	0.788531793	0.788590636	0.789822357	0.80147933	0.790627683	0.788291271	0.783346122	0.803841362	0.822226076	0.825406841	0.82770531	0.862685409	0.902810846	0.908319097	0.957179484
15:19:28.272	0.850473662	0.851362679	0.772482488	0.788578723	0.788601422	0.789839793	0.801462102	0.790593201	0.788276097	0.783279241	0.803800941	0.822184553	0.825348245	0.827643535	0.862652198	0.902801383	0.908290312	0.957190722
15:19:29.222	0.851196021	0.853646	0.772625714	0.788661997	0.788642322	0.789864921	0.80141875	0.790616703	0.788270337	0.78327983	0.803810627	0.82216946	0.825378817	0.82764382	0.862714555	0.902912609	0.908331448	0.957309867
15:19:30.259	0.852442515	0.852815238	0.772620266	0.788646907	0.788656923	0.789957559	0.801436622	0.790536244	0.788144396	0.783195161	0.803690972	0.822077162	0.825254903	0.827501187	0.862574683	0.902737288	0.908079511	0.95713322
15:19:31.210	0.851146345	0.852361959	0.772723326	0.788754538	0.788715634	0.790032155	0.801518029	0.790652431	0.788309835	0.783268214	0.803762655	0.822198341	0.825449256	0.827750647	0.862779338	0.903013292	0.908245077	0.95738214
15:19:32.160	0.851544124	0.852855732	0.772716781	0.788873201	0.788808469	0.790039463	0.801598432	0.790741533	0.788272343	0.783372001	0.803878766	0.822307067	0.825563465	0.827928836	0.862842934	0.903012849	0.908260512	0.957359435
15:19:33.110	0.850235102	0.854517032	0.772786399	0.78897738	0.788993745	0.790270512	0.801817674	0.79095461	0.78855726	0.783660845	0.804185337	0.822690402	0.826015648	0.828325676	0.863339051	0.903536567	0.908895023	0.957804353
15:19:34.147	0.851472228	0.852288373	0.773055798	0.789194008	0.789106639	0.790433091	0.802056042	0.791186345	0.788820791	0.783959161	0.804550088	0.823087418	0.826341657	0.828734105	0.863694305	0.903752994	0.909200179	0.957957796
15:19:35.098	0.852005215	0.854849989	0.773179148	0.789271503	0.789290331	0.790525325	0.802269063	0.791444929	0.789055701	0.784280496	0.804954537	0.823471013	0.826588603	0.828996131	0.863975355	0.903829777	0.909168889	0.957895134
15:19:36.048	0.850084526	0.84856457	0.773331787	0.789407177	0.789516016	0.790839127	0.802642554	0.791852298	0.789578636	0.784773162	0.805458112	0.824074115	0.827259817	0.829605662	0.864559622	0.904211387	0.909485004	0.958145651
15:19:37.085	0.851524182	0.848745049	0.773594123	0.789676023	0.789817399	0.791136137	0.803067727	0.792339045	0.790094025	0.785379012	0.806138674	0.824893918	0.828065058	0.830327231	0.86529887	0.904676678	0.909866521	0.958481384
15:19:38.035	0.853162545	0.85113799	0.773662224	0.789931894	0.790121343	0.791419051	0.803564417	0.792874026	0.790704011	0.786025374	0.806922787	0.825612811	0.828846815	0.831250916	0.865957888	0.904964644	0.909945	0.958567324
15:19:38.986	0.852335141	0.851031199	0.773925177	0.790214321	0.790509996	0.791833619	0.804156934	0.793566843	0.79146072	0.78689873	0.807998291	0.826680127	0.830055538	0.832341458	0.867095351	0.905754378	0.910680093	0.959234023
15:19:40.022	0.851538713	0.857007445	0.774166616	0.79044571	0.790904512	0.792194826	0.804749683	0.794245136	0.792148091	0.787778111	0.808939819	0.827888515	0.831135325	0.833402336	0.868093337	0.9063365	0.911127904	0.959625499
15:19:40.973	0.853354557	0.856113524	0.774496018	0.790751056	0.791310123	0.792645457	0.80543284	0.794997135	0.793013072	0.78877318	0.810113936	0.829133749	0.832403663	0.834748329	0.869363326	0.907324746	0.912014011	0.960495448
15:19:41.923	0.851940118	0.853524502	0.774717395	0.790979891	0.791652503	0.792933999	0.805974634	0.79557693	0.793707738	0.789526464	0.811097707	0.830096075	0.833345246	0.835786493	0.870206581	0.907786466	0.912313651	0.960767975
15:19:42.874	0.852393457	0.853096483	0.77491167	0.791323207	0.791953014	0.793286377	0.806472406	0.796109233	0.794244727	0.790202123	0.811939754	0.830852815	0.83419913	0.836590528	0.870990729	0.908226802	0.912641165	0.961116444
15:19:43.910	0.852090559	0.853451888	0.775107196	0.791556661	0.792275103	0.793560001	0.806933928	0.796657068	0.794858574	0.790872177	0.812670391	0.831697854	0.835041626	0.83761431	0.871888937	0.908919675	0.913249217	0.961724207
15:19:44.861	0.853309683	0.855136331	0.775346615	0.791706053	0.792537029	0.793786156	0.807321552	0.797152609	0.795336031	0.791461358	0.813432547	0.832548637	0.835891113	0.838312658	0.872685211	0.909548482	0.913819579	0.962251405
15:19:45.811	0.853782659	0.856388997	0.775528728	0.791955265	0.792822592	0.794088004	0.807762372	0.79760614	0.795808136	0.792063716	0.814073905	0.833291959	0.836761096	0.83898561	0.873578642	0.91034494	0.914625611	0.963012545
15:19:46.848	0.853554092	0.855978719	0.775571035	0.792108264	0.793015561	0.794348828	0.808085951	0.797944335	0.796263943	0.792478393	0.814671436	0.833854844	0.837307834	0.839645077	0.874194062	0.910913183	0.91516539	0.963497978
15:19:47.798	0.854011007	0.852062996	0.77581211	0.792276986	0.793192501	0.794580954	0.808374065	0.798262464	0.796608428	0.792899802	0.81524683	0.834468146	0.837912317	0.840165863	0.874785138	0.911501511	0.915562762	0.963967092
15:19:48.749	0.854852836	0.854857251	0.775918539	0.792335548	0.793353815	0.794711051	0.808576098	0.798504262	0.796893143	0.793236763	0.815675789	0.834807181	0.838233411	0.840623071	0.875115118	0.91161873	0.915695097	0.964040271
15:19:49.786	0.854568584	0.855099871	0.775973463	0.792514083	0.793480955	0.794872543	0.80883581	0.798710193	0.797062319	0.793477264	0.815958917	0.835166772	0.838520606	0.841016812	0.875386566	0.911693973	0.915890433	0.964010066
15:19:50.736	0.854028791	0.856701133	0.776167601	0.792659468	0.793689239	0.795052947	0.809040986	0.799022083	0.797362179	0.793876205	0.816437525	0.835636192	0.83915801	0.8416328	0.876020667	0.912155903	0.91639702	0.964561096
15:19:51.686	0.854918574	0.857320468	0.776185658	0.792782706	0.793830115	0.795187725	0.809293605	0.79929554	0.797668743	0.794192006	0.816717113	0.836021158	0.839494581	0.841943484	0.876331317	0.912365517	0.916579752	0.964660968
15:19:52.637	0.854888834	0.856679855	0.776406656	0.79294413	0.794042315	0.795395702	0.809617656	0.799632633	0.798027638	0.794625067	0.817287441	0.836667851	0.840084358	0.842520097	0.876962561	0.912880196	0.91697096	0.965021752
15:19:53.674	0.85479709	0.854328346	0.776510049	0.793116156	0.794234518	0.795628619	0.809900911	0.799968643	0.798552196	0.795037771	0.817713274	0.837145351	0.840673379	0.842908285	0.877411517	0.913029582	0.917054714	0.965089029
15:19:54.624	0.854216977	0.853006566	0.77671115	0.793305945	0.794460429	0.795862718	0.81031335	0.800425401	0.798896653	0.795646377	0.818404738	0.837887127	0.84143435	0.84365711	0.878159042	0.913627444	0.917597285	0.965725658
15:19:55.574	0.856592362	0.857383391	0.776901615	0.793428867	0.794763065	0.796123047	0.810698795	0.800859408	0.799488802	0.796213594	0.819016463	0.838554607	0.842090301	0.844502555	0.878889987	0.914090869	0.917929323	0.966020719
15:19:56.611	0.855686619	0.855356007	0.777155624	0.793714192	0.795058278	0.796345843	0.811136989	0.801298646	0.800050875	0.79677455	0.819787847	0.839340684	0.842783384	0.845120991	0.879464398	0.914347179	0.918160074	0.966202717
15:19:57.562	0.855256006	0.856708174	0.777243859	0.793908901	0.795345073	0.796590306	0.811566512	0.801810617	0.800554796	0.797438622	0.820509323	0.840155142	0.843602524	0.845996498	0.880256409	0.91488673	0.918715474	0.966557306
15:19:58.512	0.856662944	0.858015952	0.777465379	0.794093759	0.795573582	0.796942705	0.811968356	0.802264174	0.801093588	0.797970666	0.821119499	0.840774447	0.844255179	0.846763737	0.880780599	0.915115383	0.918981903	0.966654025
15:19:59.549	0.853892705	0.856356243	0.777596998	0.794333067	0.795878471	0.797214411	0.812453181	0.802775404	0.80156942	0.798650282	0.821859574	0.841801836	0.845101894	0.847676992	0.881732056	0.915824758	0.919620738	0.967323568
15:21:15.149	0.865909063	0.876370227	0.788842271	0.805801493	0.81035662	0.811765658	0.832997393	0.82588327	0.826162789	0.827321965	0.854539813	0.876775904	0.879866499	0.882647183	0.914542285	0.937701704	0.939094195	0.984067822
15:21:16.099	0.864743178	0.86444052	0.788819003	0.806126425	0.81059031	0.812046239	0.83318271	0.826074563	0.826736736	0.827584567	0.855092602	0.877066169	0.880372629	0.883167416	0.914968987	0.938219901	0.939373626	0.984397583
15:21:17.050	0.86487194	0.863838446	0.789159488	0.806373785	0.810805499	0.812271022	0.833436879	0.826309174	0.826948415	0.827762829	0.855267854	0.877198675	0.880519744	0.883286138	0.914976174	0.937987895	0.939153037	0.984092869
15:21:18.086	0.866267768	0.865980355	0.789123813	0.806493848	0.810922649	0.812336159	0.833546599	0.82638395	0.826963755	0.827867931	0.855371049	0.877202613	0.88057639	0.88335054	0.915011209	0.938053677	0.939199703	0.984103241
15:21:19.037	0.865431187	0.865794017	0.789272274	0.806569991	0.811025405	0.812444615	0.833672456	0.826515247	0.827045426	0.827981164	0.855490054	0.877372711	0.880744582	0.883525958	0.915176611	0.938207219	0.939326107	0.984239722
15:21:19.987	0.86594952	0.865971811	0.789294057	0.806655328	0.811136178	0.812585003	0.833761998	0.826631738	0.827260587	0.828103124	0.855551688	0.877452665	0.880869864	0.883610338	0.91521236	0.938174266	0.939328327	0.984171247
15:21:21.024	0.865532617	0.862861367	0.789501237	0.80682329	0.81130934	0.812712182	0.834000198	0.826864411	0.827496682	0.828399925	0.855975428	0.877869475	0.881164858	0.88414406	0.91567632	0.938642717	0.939720165	0.984644952
15:21:21.974	0.866839225	0.864776657	0.789627016	0.806967573	0.811461136	0.812864016	0.834212519	0.827033923	0.827790614	0.828588279	0.85621137	0.87816227	0.881393096	0.884386114	0.915919512	0.938884281	0.939953462	0.9848113
15:21:22.925	0.867626181	0.866771698	0.789766063	0.80704523	0.811586889	0.813036194	0.834364498	0.82725388	0.828060807	0.828838459	0.856536964	0.878449887	0.881720428	0.884713238	0.916187657	0.939039377	0.94005312	0.984968075
15:21:23.962	0.866510188	0.866888603	0.789983689	0.807214313	0.811725213	0.813163082	0.834572869	0.827486457	0.828351529	0.829074172	0.856830368	0.878719535	0.88200803	0.884918514	0.91644184	0.939174594	0.940168154	0.985099117
15:21:24.912	0.867473256	0.866031742	0.789994013	0.807355783	0.811930423	0.813371167	0.834847954	0.827754018	0.828633308	0.829454784	0.857276777	0.879273846	0.882625887	0.885402952	0.917022667	0.939747197	0.940581418	0.985662382
15:21:25.862	0.86605542	0.867534661	0.790120787	0.807388836	0.812082565	0.813512642	0.835010749	0.827955543	0.828847202	0.829661642	0.857448659	0.879466282	0.882783876	0.885484774	0.917174029	0.939736666	0.940414511	0.985575373
15:21:26.899	0.865910764	0.866944025	0.790291224	0.807555492	0.812237565	0.813680419	0.835286642	0.828222229	0.829121382	0.82997941	0.857765999	0.879820634	0.883191963	0.885939295	0.917525716	0.939996041	0.940516013	0.985730533
15:21:27.850	0.865925686	0.868462478	0.790366273	0.807648735	0.812332651	0.813710051	0.835395907	0.82831922	0.829202303	0.830090458	0.85786141	0.879815012	0.883225081	0.885832104	0.917435086	0.939718808	0.940367045	0.98540874
15:21:28.800	0.866263446	0.867658935	0.790422436	0.807783371	0.812508707	0.813818593	0.835558223	0.82850683	0.829329805	0.830265351	0.858021481	0.879998602	0.883359875	0.886177255	0.917496826	0.939616031	0.940194006	0.98522319
15:21:29.750	0.866637051	0.865254759	0.790629894	0.807968178	0.812654509	0.814059026	0.835822387	0.828782636	0.829689294	0.83060117	0.858371117	0.880487596	0.883825686	0.886605708	0.917941998	0.940099315	0.940655934	0.985690117
15:21:30.787	0.866784472	0.866500767	0.790813493	0.808082755	0.812860242	0.814301079	0.836068158	0.828998165	0.830011859	0.830899559	0.858712375	0.880836374	0.884265683	0.886959167	0.918308854	0.940345524	0.941001981	0.985959164
15:21:31.738	0.867230931	0.867877995	0.790844952	0.808262777	0.812951666	0.814426852	0.836265195	0.829203626	0.830200665	0.831111245	0.859066278	0.881135421	0.884577505	0.887315633	0.918646983	0.940698028	0.941372557	0.986389708
15:21:32.688	0.866708206	0.866884611	0.790957636	0.80827786	0.813058203	0.814527685	0.836297532	0.829298207	0.830302268	0.831164842	0.859070883	0.881141713	0.884544781	0.887326656	0.918565642	0.940526769	0.941162147	0.986158448
15:21:33.725	0.865988031	0.864819918	0.79099158	0.808316052	0.813116364	0.81464038	0.836415868	0.829313404	0.830294237	0.831212451	0.859077862	0.881142291	0.884565942	0.887341233	0.918520296	0.940365827	0.940938581	0.9859429
15:21:34.675	0.867095797	0.867156896	0.791132015	0.80842761	0.813211256	0.814628399	0.836573669	0.829492569	0.830417366	0.831395982	0.859366964	0.881400717	0.884855019	0.887694624	0.918869808	0.940759453	0.94130087	0.986394021
15:21:35.626	0.867213425	0.865995853	0.791237157	0.808525612	0.813273213	0.81473304	0.836625446	0.8295123	0.83039861	0.831425694	0.859339099	0.881326026	0.884797773	0.887525875	0.918718854	0.940520099	0.940926408	0.986092414
15:21:36.662	0.866881111	0.863739215	0.791364715	0.808663446	0.813410468	0.814909268	0.836824127	0.829751403	0.830580089	0.831692759	0.859764289	0.881774633	0.885215759	0.887950631	0.919277935	0.941179338	0.941491806	0.986698011
15:21:37.613	0.866680042	0.863823213	0.791378454	0.808731261	0.813512445	0.815014641	0.836910793	0.829853883	0.830652365	0.831801203	0.8599008	0.881895147	0.885285894	0.888100081	0.919365725	0.941237761	0.941543786	0.986718707
15:21:38.563	0.866521972	0.866162531	0.791614127	0.808851343	0.813622999	0.815097553	0.837118388	0.830000533	0.83083591	0.831955929	0.860095314	0.882083963	0.885438298	0.888329635	0.919604048	0.941444171	0.941793706	0.986898793
15:21:39.514	0.867482891	0.86801115	0.791724284	0.808906901	0.81374858	0.815254024	0.837143446	0.830101073	0.830968814	0.832066894	0.860231644	0.882246865	0.885599925	0.888421816	0.919775837	0.941537205	0.941981143	0.986975624
15:21:40.550	0.866982884	0.868399192	0.79160333	0.80900708	0.813822335	0.815226493	0.837200736	0.830181281	0.831048093	0.832144766	0.86031849	0.882264257	0.885654548	0.888562072	0.919752407	0.941453589	0.941813612	0.986848675
15:21:41.501	0.866994205	0.869271741	0.791837732	0.809137801	0.813996231	0.815454574	0.837548518	0.830412529	0.831470501	0.832457542	0.860649521	0.882762184	0.886090295	0.888855551	0.920272864	0.941947863	0.942398785	0.987451644
15:21:42.451	0.867884651	0.862481471	0.791893772	0.809240622	0.814121457	0.815544683	0.837639517	0.830541882	0.831454551	0.832548881	0.860723873	0.882785859	0.886189635	0.888905652	0.920288069	0.941833102	0.942169331	0.987304028
15:21:43.488	0.86690944	0.865086788	0.792017406	0.809337057	0.814218847	0.815682327	0.837689362	0.83060041	0.831660896	0.832605141	0.860744896	0.882846366	0.886212726	0.888875429	0.920217112	0.941637144	0.941908448	0.987056222
15:21:44.438	0.867313447	0.868946832	0.792150295	0.809442034	0.814310606	0.815748513	0.837787668	0.830715242	0.831801487	0.832722019	0.860774777	0.882919525	0.886303361	0.888909743	0.920189138	0.941533915	0.941781554	0.98682802
15:21:45.389	0.867203787	0.871888131	0.792237223	0.809592673	0.814461998	0.815911396	0.838044509	0.83097767	0.832075509	0.832989429	0.861145451	0.883198136	0.886614055	0.889327307	0.920502011	0.941800016	0.941929111	0.9870703
15:21:46.339	0.868584271	0.868882197	0.792359152	0.809710952	0.814661107	0.816123783	0.83824738	0.831157636	0.83217204	0.833225276	0.861383018	0.8834017	0.886803876	0.889536896	0.92062681	0.941835021	0.941839587	0.987057897
15:21:47.376	0.867991013	0.86676132	0.792552768	0.809776344	0.814751365	0.816268494	0.838340334	0.831266966	0.83229731	0.833281181	0.861369773	0.883385255	0.88669078	0.889334259	0.920411833	0.941359162	0.941416896	0.986488467
15:21:48.326	0.868669601	0.869192012	0.792674943	0.810061627	0.815034211	0.816519483	0.838815321	0.831727197	0.832649441	0.833859086	0.862102471	0.88412446	0.887482205	0.890325489	0.921260356	0.942229142	0.942259055	0.98734012
15:21:49.277	0.8692158	0.869780449	0.792874834	0.810192304	0.815258225	0.816672465	0.839073373	0.832049278	0.833002753	0.834235215	0.862558746	0.884595156	0.888042622	0.890752834	0.921723158	0.942560683	0.942527963	0.987640088
15:21:50.314	0.868997139	0.871881039	0.792918765	0.810319081	0.815468759	0.816813764	0.839332795	0.832289104	0.833308243	0.834558463	0.862963263	0.884937081	0.888402748	0.891064223	0.922053801	0.942735967	0.942673482	0.987777637
15:21:51.264	0.868675444	0.870394812	0.793048583	0.810474245	0.815566156	0.817000245	0.83947806	0.832487447	0.83344992	0.834741477	0.863138504	0.885134369	0.888640204	0.891297048	0.922137548	0.942780419	0.942642079	0.987740443
15:21:52.214	0.86949503	0.866619536	0.793134404	0.810625381	0.815715074	0.817132294	0.839684627	0.832696227	0.833674508	0.834976011	0.863452453	0.885391865	0.888920859	0.891554383	0.922322759	0.942903656	0.942741914	0.987812048
15:21:53.251	0.870169525	0.870704184	0.793270324	0.810640755	0.815770715	0.817269443	0.839741085	0.832776306	0.833766418	0.835040417	0.863528014	0.885389179	0.888905565	0.891650609	0.922309443	0.942788734	0.942560983	0.987631634
15:21:54.202	0.868663094	0.869411592	0.793355969	0.810717429	0.815868405	0.817329677	0.839869414	0.832849102	0.833942264	0.835121532	0.863599461	0.885541188	0.888973158	0.8917351	0.922410455	0.942822641	0.942505301	0.987683204
15:21:55.152	0.869986665	0.870303065	0.793310904	0.81078634	0.815917934	0.817358794	0.83989054	0.832901638	0.833952587	0.83519291	0.863669714	0.885641886	0.889024711	0.891872096	0.922574017	0.943086334	0.942620198	0.987902397
15:21:56.189	0.86890322	0.871198811	0.793436775	0.81081738	0.815952134	0.817423054	0.839936424	0.832887912	0.833928311	0.835156944	0.863659816	0.885661202	0.888998641	0.89190796	0.922626336	0.943248971	0.942901979	0.988106816
15:21:57.139	0.867733656	0.868353314	0.793417763	0.810819335	0.815870087	0.817299312	0.839714028	0.832653861	0.833692114	0.834817452	0.863212667	0.885153368	0.888571563	0.891360847	0.922076692	0.942656477	0.942389255	0.987556572
15:21:58.090	0.86906702	0.869819819	0.793426002	0.810788398	0.815809413	0.817259369	0.839598324	0.832503855	0.833393625	0.83463539	0.8630291	0.884940823	0.888378292	0.891203465	0.92194288	0.942702729	0.94246209	0.987614574
15:21:59.040	0.868929799	0.872432065	0.793398319	0.810756475	0.81570841	0.817138649	0.839383097	0.832291628	0.833227076	0.834304869	0.862648509	0.884576337	0.888024688	0.890756207	0.921545583	0.942366037	0.942265496	0.987411472
15:22:00.077	0.869440695	0.868872984	0.793345464	0.810729973	0.815658293	0.817090575	0.839243834	0.83204546	0.83296062	0.833994695	0.862275074	0.884139288	0.887575543	0.890247723	0.921134361	0.942048625	0.941974665	0.987083235
15:23:15.850	0.872741856	0.867647852	0.800230528	0.817264403	0.822855486	0.824443199	0.847580782	0.840490167	0.841344682	0.8433786	0.872427247	0.894674047	0.897960245	0.901008531	0.930496827	0.94840033	0.948566712	0.991914243
15:23:16.800	0.875077264	0.875272502	0.800071638	0.817536383	0.823259515	0.824780228	0.848119437	0.841207146	0.842349043	0.843938148	0.873322415	0.895557317	0.898957598	0.901739176	0.931423275	0.948922967	0.949324276	0.992426401
15:23:17.837	0.874276784	0.875520325	0.800551539	0.818060487	0.823936556	0.825410187	0.849125304	0.842317247	0.843655917	0.843789158	0.874951562	0.897165006	0.900497036	0.903315178	0.933037548	0.950075731	0.9504747	0.993491329
15:23:18.787	0.874648735	0.875051964	0.800841315	0.818356965	0.824391743	0.825862348	0.849858184	0.843104755	0.844431766	0.844667938	0.876024687	0.898400595	0.901793209	0.904655958	0.934234086	0.951075665	0.95142406	0.994394644
15:23:19.738	0.876214282	0.878765916	0.801043088	0.818696151	0.824747798	0.826245839	0.85043975	0.843766653	0.845240672	0.84526801	0.876775674	0.899301921	0.902618288	0.905578636	0.934983682	0.951543373	0.951812711	0.994729043
15:23:20.774	0.875933138	0.875047349	0.801311304	0.818944013	0.825099226	0.826670339	0.850941865	0.844342335	0.845960837	0.845655375	0.877545406	0.900049498	0.903407189	0.906284494	0.935641531	0.951909165	0.952109644	0.994911996
15:23:21.725	0.875197633	0.877922445	0.801524116	0.819175447	0.825467925	0.826963373	0.85147028	0.844935713	0.846547746	0.846303437	0.878370576	0.900929313	0.904325535	0.907121313	0.936380574	0.952299889	0.952369744	0.995175863
15:23:22.675	0.876184354	0.875758714	0.801885303	0.819460145	0.825750776	0.827317046	0.85203437	0.84544275	0.847044245	0.847075472	0.879083808	0.90167831	0.905069656	0.907770544	0.936881711	0.952579906	0.952662661	0.995309385
15:23:23.626	0.876225811	0.874515205	0.80198655	0.819681149	0.826066583	0.827557802	0.852379603	0.845947248	0.847549055	0.847871363	0.879800339	0.902314995	0.905593303	0.908476242	0.937398565	0.952764003	0.952828981	0.995358881
15:23:24.662	0.876338882	0.878408947	0.802223658	0.819931177	0.826387428	0.827915431	0.852904453	0.846507692	0.848168109	0.848444055	0.8806265	0.903093503	0.906382283	0.909313413	0.938151438	0.953363136	0.953272519	0.99576328
15:23:25.613	0.876589841	0.876952458	0.80243182	0.820164394	0.82667041	0.82819878	0.853375092	0.847021126	0.848752977	0.849260948	0.88122566	0.903865821	0.907148491	0.91006881	0.938833333	0.953789315	0.953681766	0.996126005
15:23:26.563	0.875076208	0.875365037	0.802660621	0.820412134	0.826995117	0.828499333	0.853806673	0.847520968	0.849186711	0.849864497	0.881763311	0.904534202	0.907883618	0.910743781	0.939486871	0.954152017	0.95388181	0.996377872
15:23:27.600	0.875915091	0.878337677	0.802886163	0.820579405	0.827211556	0.828714317	0.85413589	0.847871202	0.849547743	0.850345737	0.882223959	0.905000989	0.908272174	0.911220741	0.93987701	0.954276177	0.953949089	0.99644097
15:23:28.550	0.876350837	0.878032308	0.802938777	0.820675991	0.827412939	0.828846881	0.85437871	0.848129653	0.849705989	0.850636117	0.882535514	0.905289914	0.90849402	0.911414405	0.940012978	0.95421814	0.953739578	0.99625954
15:23:29.501	0.877159653	0.876764997	0.803173272	0.820885828	0.827639054	0.829127566	0.854750286	0.848579446	0.850252247	0.85129172	0.883277694	0.906008744	0.909341659	0.912210268	0.940828089	0.955019868	0.954641829	0.997073077
15:23:30.451	0.876199533	0.876470791	0.803234392	0.821046288	0.827852104	0.829348103	0.854975744	0.848838112	0.850470142	0.851678955	0.883621586	0.906401526	0.909760415	0.912696066	0.941199339	0.955413207	0.954869453	0.997472997
15:23:31.488	0.878101019	0.878556831	0.803407665	0.821113338	0.827972763	0.829474503	0.855166955	0.849012957	0.850677029	0.851883272	0.883936549	0.906756699	0.910125059	0.912924301	0.941543087	0.955775303	0.955258688	0.997947059
15:23:32.438	0.876853536	0.879968308	0.803439742	0.821122553	0.827908894	0.829424734	0.855058635	0.848853698	0.850561731	0.851638528	0.88362209	0.906333949	0.909644825	0.912624925	0.941021087	0.955212894	0.954726961	0.99725157
15:23:33.475	0.877643728	0.878600544	0.803350483	0.821093533	0.827869802	0.829318156	0.854869059	0.848638417	0.850221157	0.851290774	0.8831557	0.905875983	0.909162158	0.912054129	0.940527174	0.954778749	0.954346443	0.996835523
15:23:34.426	0.87740161	0.87563988	0.803282139	0.821061607	0.827668544	0.829189551	0.854516967	0.848231055	0.849750638	0.850705253	0.882521894	0.90514164	0.908378463	0.911387633	0.939821074	0.954068201	0.953694202	0.996105045
15:23:35.376	0.877301863	0.87813182	0.803222703	0.820955516	0.827584965	0.829081379	0.854302498	0.847947509	0.849500377	0.850326599	0.8821248	0.904769744	0.90801829	0.910937075	0.939653651	0.95422979	0.9538857	0.996406304
15:23:36.326	0.877349349	0.881011338	0.803253512	0.820845224	0.827329679	0.828770496	0.853824754	0.84737042	0.848849802	0.849547824	0.881258178	0.903876553	0.907117397	0.910111872	0.938796813	0.953623634	0.953306774	0.995863443
15:23:37.363	0.877836132	0.876333858	0.803180913	0.820655838	0.827077798	0.828563848	0.853328381	0.846784073	0.848258563	0.848804599	0.880351788	0.902935066	0.90632114	0.90914775	0.937951833	0.95308917	0.9528539	0.995461598
15:23:38.314	0.876372095	0.878593523	0.802869639	0.820474916	0.826755008	0.828236104	0.852726088	0.846125365	0.847561973	0.84782853	0.879510992	0.901978503	0.905299829	0.908203293	0.937104346	0.952597405	0.952473932	0.995173299
15:23:39.264	0.87688226	0.878047225	0.802692729	0.82029056	0.826370992	0.82795909	0.852123564	0.845399678	0.846820146	0.846800213	0.878551905	0.90086548	0.90417654	0.906951791	0.936121875	0.952020885	0.952063539	0.994793419
15:23:40.301	0.878213106	0.873328965	0.80246707	0.819984141	0.82593796	0.82742574	0.851229065	0.84438598	0.845767075	0.845529969	0.877015309	0.899307034	0.902625	0.905413014	0.93450995	0.950750953	0.950893677	0.993572105
15:23:41.251	0.876262117	0.874728757	0.802310236	0.819788743	0.825627679	0.827141348	0.850684431	0.843707944	0.844936541	0.844597323	0.875993425	0.898341664	0.901726749	0.904469066	0.933797898	0.950475745	0.950599066	0.993585717
15:23:42.202	0.876450004	0.878175237	0.802101422	0.819539377	0.825254956	0.826753641	0.849981848	0.842978794	0.844162994	0.843568922	0.874862866	0.897175448	0.900538613	0.903334717	0.932863677	0.95001869	0.950183395	0.99335235
15:23:43.238	0.874719103	0.876870042	0.80199558	0.819309223	0.824888337	0.826367888	0.849306201	0.842130952	0.843291963	0.842513854	0.873589232	0.895845893	0.899108422	0.901953559	0.931604672	0.94917239	0.949611275	0.992700022
15:23:44.189	0.876781661	0.873668663	0.801706508	0.81915617	0.824534673	0.825967023	0.848615156	0.841422849	0.842468996	0.841565714	0.872590952	0.894688641	0.898090597	0.900766467	0.930631496	0.948538053	0.949307867	0.992289546
15:23:45.139	0.877550142	0.875408033	0.801556494	0.818987069	0.824235881	0.825730851	0.848113499	0.840817299	0.841849652	0.841097946	0.871793381	0.893863682	0.897166034	0.899914072	0.929916339	0.948138979	0.949048655	0.992025395
15:23:46.090	0.875910653	0.877106655	0.80149599	0.818804735	0.824005383	0.825391207	0.847610368	0.840274848	0.841209938	0.840519712	0.870992243	0.892987139	0.89625037	0.899139664	0.929162648	0.947670334	0.948731734	0.991666221
15:23:47.126	0.87594037	0.875941637	0.801375347	0.81866643	0.823759934	0.825266027	0.847165003	0.839704358	0.840388475	0.839846451	0.870176295	0.892010132	0.895317088	0.898205248	0.928133917	0.946795962	0.947781743	0.990814951
15:23:48.077	0.876043191	0.875420877	0.801312777	0.818607111	0.823599127	0.825146679	0.84690605	0.839392845	0.840141327	0.839386633	0.869702817	0.891622517	0.894891482	0.89770215	0.9277763	0.94664241	0.947611962	0.990715809
15:23:49.027	0.875637993	0.872322925	0.801328807	0.818592163	0.823512487	0.825004562	0.846640164	0.839139318	0.83977222	0.839075344	0.869277164	0.891209418	0.894524576	0.897379251	0.927423499	0.946388316	0.947441772	0.990549809
15:23:50.064	0.875421061	0.87368581	0.801299885	0.818521167	0.823473924	0.824937855	0.846571321	0.839021707	0.839606079	0.838983806	0.869155138	0.891057284	0.894357456	0.897091676	0.927301616	0.946439893	0.947473495	0.990646103
15:23:51.014	0.876333326	0.876441176	0.801254382	0.818514172	0.823458338	0.824953973	0.846451838	0.838854533	0.839579126	0.838864954	0.868952635	0.890804749	0.894136796	0.896899636	0.927021749	0.946135769	0.947198555	0.990340567
15:23:51.965	0.876362134	0.873432574	0.801274544	0.818632748	0.823478539	0.824862731	0.846416735	0.838850827	0.83950841	0.838769243	0.868792087	0.890672836	0.893979451	0.89676066	0.926853	0.945989682	0.947020366	0.990199799
15:23:53.002	0.87659016	0.876567371	0.801333223	0.818650647	0.823606736	0.825083399	0.846554539	0.838990027	0.839684593	0.838888261	0.869040531	0.890870273	0.894171647	0.896925074	0.927127886	0.946265133	0.947279342	0.990457022
15:23:53.952	0.875658713	0.875655222	0.801474781	0.818774082	0.823693819	0.82515625	0.846755567	0.839138271	0.839922787	0.839074309	0.869280254	0.891062034	0.894334672	0.897219691	0.927319374	0.946308439	0.947322932	0.990526981
15:23:54.902	0.876426079	0.875585883	0.80156814	0.818857518	0.823831705	0.825322176	0.846943851	0.839350467	0.840138287	0.839179974	0.869515551	0.891335843	0.894626748	0.897436004	0.927543208	0.946489653	0.947544554	0.990623107
15:23:55.853	0.877699914	0.875958955	0.801677261	0.818973615	0.823996361	0.825416615	0.847134074	0.839603748	0.840470319	0.839406051	0.869813396	0.891837549	0.895100614	0.897916541	0.928068205	0.946901527	0.948184824	0.991078683
15:23:56.890	0.877391291	0.875753847	0.801749852	0.819054942	0.824134654	0.825579117	0.847328697	0.839785568	0.840671172	0.83943365	0.8700565	0.892044619	0.895371733	0.898187455	0.928287692	0.947093801	0.948367532	0.991201771
15:23:57.840	0.876544981	0.875151709	0.801930487	0.819161202	0.824211749	0.825674351	0.847557721	0.839983476	0.84089608	0.839717682	0.87033018	0.892405244	0.895708454	0.898490865	0.928582189	0.947307927	0.948540337	0.991420915
15:23:58.790	0.877437367	0.875450926	0.802076651	0.819305971	0.824421584	0.825877247	0.84773867	0.84023955	0.841100171	0.839780165	0.870663211	0.892741973	0.896069883	0.898934158	0.928962235	0.947662052	0.94868341	0.991699479
15:23:59.827	0.876387781	0.876531403	0.802128449	0.819401229	0.824529427	0.825929528	0.84792053	0.840399141	0.841216453	0.839983511	0.870817026	0.892921512	0.8962261	0.899055059	0.929008896	0.947535363	0.948434402	0.991447865
15:25:15.341	0.877980105	0.8828758	0.804908279	0.821931642	0.82604658	0.827462879	0.84674407	0.838364901	0.838231077	0.837155188	0.865900463	0.88787246	0.891253188	0.893941796	0.924321868	0.944295161	0.946295663	0.989116242
15:25:16.291	0.878882621	0.877904815	0.805060266	0.821946778	0.826022516	0.827473303	0.846760192	0.838385078	0.83841941	0.837009535	0.866049619	0.887853216	0.891158669	0.893987113	0.924344252	0.944302235	0.946523258	0.988986086
15:25:17.242	0.878701275	0.882181201	0.80527717	0.822181351	0.826218542	0.827677825	0.847055038	0.838690292	0.838770185	0.837388421	0.866589487	0.888440457	0.891681644	0.894628897	0.925056381	0.945313546	0.947647559	0.989997295
15:25:18.278	0.879379792	0.878912976	0.805263531	0.822196596	0.826200805	0.827649749	0.846974464	0.838595225	0.838642661	0.837198747	0.866475093	0.88825137	0.891502016	0.894440997	0.924854479	0.94509424	0.947494557	0.98980098
15:25:19.229	0.879012769	0.87950025	0.805369377	0.82218437	0.826199434	0.827766202	0.846913975	0.838439503	0.838479842	0.836940662	0.866144974	0.887949154	0.891174445	0.894068981	0.924485805	0.944585702	0.946990941	0.989237022
15:25:20.179	0.879361739	0.878436796	0.805436842	0.822246592	0.826257309	0.827775108	0.846942242	0.838529432	0.838571341	0.837090323	0.866243109	0.887993293	0.891242923	0.894128885	0.924536416	0.944690376	0.946948518	0.989330289
15:25:21.216	0.879782663	0.878674335	0.805593378	0.822425891	0.826415301	0.82795209	0.847203168	0.838760772	0.838741595	0.837384513	0.866592352	0.888384343	0.891593974	0.894496489	0.924916062	0.945092873	0.947432042	0.98976295
15:25:22.166	0.881546582	0.879625442	0.8056019	0.822508235	0.826557415	0.828076362	0.847392632	0.83897922	0.83903765	0.837510115	0.866929156	0.88872013	0.891960823	0.8947947	0.925231233	0.945338383	0.947620808	0.989981599
15:25:23.117	0.880720176	0.878607016	0.805753699	0.822639522	0.826745544	0.828218426	0.847643835	0.839223121	0.839295724	0.837771008	0.867264796	0.889003365	0.892411279	0.895224614	0.925585664	0.945552649	0.947830557	0.990198606
15:25:24.067	0.879605616	0.880361255	0.805816107	0.822727894	0.82685138	0.828361717	0.84773612	0.839308738	0.839462279	0.837862166	0.867293304	0.888986609	0.892351704	0.895213909	0.925429425	0.945277036	0.947562553	0.98985751
15:25:25.104	0.8800793	0.878154493	0.805993214	0.822872709	0.82700156	0.828484245	0.847996959	0.839563097	0.839665727	0.837945261	0.867644303	0.889392465	0.89274051	0.895538017	0.925786187	0.945485776	0.947691022	0.990046748
15:25:26.054	0.880190037	0.879336673	0.806047056	0.822974213	0.827067359	0.828566867	0.848077013	0.839681594	0.839787836	0.838084906	0.867795472	0.889485244	0.892827946	0.895628282	0.925769363	0.945388021	0.947613397	0.989884646
15:25:27.005	0.879718836	0.881026892	0.806176844	0.822988936	0.827188524	0.828617252	0.848105526	0.839729846	0.839847876	0.838190086	0.867813882	0.889516807	0.892833081	0.895560356	0.925728936	0.945311209	0.947467355	0.989775588
15:25:28.042	0.879956734	0.878749726	0.806179596	0.823130311	0.827278051	0.828653273	0.848258535	0.839865966	0.839911333	0.838232907	0.868016393	0.889662962	0.893078681	0.895839639	0.925972709	0.945633011	0.947797587	0.990090488
15:25:28.992	0.880689696	0.881038264	0.806267152	0.823140775	0.827300312	0.828827494	0.848253967	0.839841985	0.840013561	0.838161799	0.867990638	0.889625695	0.893015224	0.895804138	0.92595646	0.945704931	0.947833848	0.99017996
15:25:29.942	0.880479806	0.881662679	0.806260957	0.823132	0.827293135	0.828736526	0.848120716	0.839636443	0.839803818	0.838082976	0.86770952	0.889378467	0.892756136	0.89553294	0.925717705	0.945563775	0.947782454	0.990079357
15:25:30.979	0.880317151	0.879277054	0.806171091	0.823067823	0.827113738	0.828607884	0.847892998	0.839355686	0.839323097	0.837534044	0.867223598	0.888833145	0.892209373	0.894842481	0.925182393	0.945096975	0.947376248	0.989690885
15:25:31.930	0.880218969	0.878248383	0.806159418	0.823045885	0.827054172	0.828487246	0.847638237	0.839076335	0.839117196	0.837198741	0.86675385	0.888320012	0.891714645	0.894476914	0.924783256	0.944833028	0.947201164	0.989487154
15:25:32.880	0.880430047	0.878332105	0.806074115	0.822921937	0.826863584	0.828345587	0.847263347	0.838645516	0.838557149	0.836680134	0.866041915	0.887655898	0.890946301	0.893798796	0.9241076	0.944312018	0.946761108	0.989092835
15:25:33.830	0.880592421	0.880010148	0.806082413	0.822822447	0.826655847	0.828153205	0.846907954	0.838235738	0.838143349	0.836306845	0.865456396	0.88702803	0.890331669	0.893213572	0.923567115	0.944080142	0.946614606	0.98900389
15:25:34.867	0.879057173	0.880019455	0.805812299	0.822699252	0.826437562	0.827941223	0.846524765	0.83777742	0.83769535	0.835851563	0.864722446	0.88631995	0.889592438	0.892443128	0.922996991	0.94388807	0.946496768	0.988959893
15:25:35.818	0.880028252	0.879696745	0.805718911	0.822491582	0.826070437	0.827628933	0.84591205	0.837078252	0.836927393	0.834992625	0.863639998	0.885264416	0.888575496	0.891369463	0.922038451	0.943147502	0.945918209	0.988312489
15:25:36.768	0.879453379	0.875780275	0.805469412	0.822204686	0.82564081	0.827143535	0.845166473	0.836221066	0.835900415	0.833838149	0.862412959	0.883922048	0.887237834	0.889998388	0.920801007	0.942206134	0.945235664	0.987530983
15:25:37.805	0.878627273	0.878365703	0.805199602	0.821943288	0.825244161	0.826672009	0.844411845	0.83535729	0.83498384	0.832703156	0.861310189	0.882583907	0.885952257	0.888790068	0.919572086	0.941465927	0.944658073	0.986932842
15:25:38.755	0.878909114	0.87760747	0.804882969	0.821660079	0.824728176	0.82624243	0.843589215	0.834376346	0.833976058	0.831377546	0.859936077	0.881220467	0.884611483	0.887283018	0.918348995	0.94082042	0.94421361	0.986480178
15:25:39.706	0.878557177	0.876776261	0.8047057	0.821319042	0.824263744	0.825732618	0.84268605	0.83342531	0.832834184	0.830140424	0.858516943	0.879810013	0.883231628	0.885914472	0.917164956	0.940224346	0.94376421	0.986163334
15:25:40.656	0.878494218	0.87797962	0.804389311	0.820985934	0.823716429	0.825219488	0.841779571	0.832396353	0.83163054	0.828828618	0.856939295	0.878295154	0.881600008	0.884434956	0.915915783	0.939418339	0.943271041	0.985593471
15:25:41.693	0.878067005	0.875250045	0.804118848	0.820672968	0.823294979	0.824762919	0.84101796	0.831451594	0.830608341	0.827449156	0.855682173	0.876930262	0.880294408	0.883112714	0.914766357	0.938895276	0.94278054	0.985301864
15:25:42.643	0.877427186	0.87854639	0.803865275	0.820339516	0.82278266	0.824237835	0.840076571	0.830407482	0.829442442	0.826115321	0.854270938	0.875264397	0.878608816	0.881475884	0.913261352	0.937800806	0.941787524	0.984437115
15:25:43.594	0.877704527	0.87696689	0.803577378	0.820075206	0.82234719	0.823741416	0.839322472	0.829594597	0.828623158	0.825015382	0.85311592	0.874015639	0.87735045	0.880133	0.91207351	0.937056306	0.941169252	0.983810842
15:25:44.630	0.878688404	0.874667057	0.803436568	0.819862783	0.822035462	0.823486944	0.838758071	0.828930056	0.827932082	0.824375619	0.852169899	0.873109152	0.876542001	0.87922265	0.911331	0.936738488	0.940948897	0.983649629
15:25:45.581	0.878725211	0.876465081	0.803257775	0.819713954	0.821768675	0.823206787	0.83817629	0.82826375	0.827186695	0.823553938	0.851092954	0.872025084	0.875471094	0.878195503	0.910261359	0.935962902	0.940251869	0.982943275
15:25:46.531	0.878116842	0.879295496	0.803183607	0.819571587	0.821519423	0.822984235	0.837798406	0.827828499	0.82667082	0.823005587	0.850383103	0.871279604	0.874726087	0.877398259	0.909610782	0.935604401	0.939991361	0.982718194
15:25:47.568	0.87903638	0.876806664	0.803092024	0.819452472	0.821307215	0.822801907	0.837495418	0.827449903	0.826196019	0.822595245	0.849794973	0.870665468	0.874045953	0.876866555	0.909109799	0.935331314	0.939777825	0.982535764
15:25:48.518	0.877408968	0.881204455	0.803092971	0.819416289	0.821199983	0.822600644	0.837172405	0.827103574	0.825783357	0.822237335	0.849137173	0.870000686	0.873369334	0.876182622	0.908316602	0.934586966	0.939051099	0.981841901
15:25:49.469	0.877340505	0.874642689	0.803111299	0.819347586	0.821185824	0.822630451	0.837077229	0.826995899	0.825702856	0.822176368	0.84901945	0.869885838	0.873340026	0.876102615	0.908332502	0.934708635	0.939156783	0.982008507
15:25:50.506	0.876257774	0.876130725	0.803090255	0.819473596	0.821194925	0.822655275	0.83709788	0.826989991	0.825735989	0.822029335	0.849027773	0.869916786	0.873277587	0.876132333	0.908375902	0.934800173	0.93928279	0.982141322
15:25:51.456	0.878717856	0.87910998	0.80308365	0.819500504	0.821237731	0.822681591	0.837099503	0.827029256	0.825698049	0.822056628	0.849124106	0.870049553	0.873312397	0.87619541	0.908449401	0.934930506	0.93939991	0.982230725
15:25:52.406	0.877526148	0.876680118	0.803162422	0.819502941	0.821188496	0.822624662	0.837034926	0.826894226	0.825606338	0.821972062	0.848824228	0.869718686	0.873019951	0.875868539	0.908046572	0.934427247	0.938811732	0.981696707
15:25:53.357	0.877624096	0.876292804	0.803174257	0.819501187	0.821203024	0.822626279	0.836989391	0.826851205	0.825583396	0.821745767	0.848734217	0.869624229	0.872894894	0.875774042	0.907898116	0.934235368	0.93873183	0.981511649
15:25:54.394	0.878071723	0.878336534	0.803352028	0.819551758	0.821305663	0.822746941	0.837072224	0.826930187	0.825625696	0.821904464	0.848985087	0.86980424	0.873087477	0.875956024	0.908120837	0.934485829	0.939044638	0.981739643
15:25:55.344	0.877808471	0.877778057	0.803320167	0.819641033	0.821427042	0.822859747	0.837212778	0.827122135	0.825865518	0.822050456	0.84924207	0.870095981	0.87348396	0.87626532	0.908484629	0.934888527	0.939473704	0.98218714
15:25:56.294	0.877731613	0.877967529	0.803469523	0.819664934	0.821420958	0.822879541	0.837238399	0.827101789	0.825806564	0.821931659	0.849115588	0.869884182	0.873233853	0.875985532	0.908139415	0.93437297	0.938989087	0.981543197
15:25:57.331	0.878023197	0.874494493	0.803438481	0.81978277	0.82155458	0.822965961	0.837384931	0.827254963	0.825968851	0.822166552	0.849379614	0.870096712	0.8735344	0.876215258	0.908304239	0.934453919	0.939138222	0.981577498
15:25:58.282	0.87909719	0.879356259	0.803589458	0.819964145	0.821683569	0.823152834	0.837572734	0.827481694	0.826226631	0.822324867	0.849610824	0.870380385	0.873780205	0.876513321	0.908544765	0.93451197	0.93920855	0.981613021
15:25:59.232	0.879193839	0.87907278	0.803747983	0.820079102	0.821918604	0.823372465	0.837926984	0.827850269	0.82654493	0.82261548	0.850220785	0.87098215	0.874402108	0.877021456	0.909209808	0.935006871	0.939783957	0.982112733
15:26:00.269	0.878158791	0.880508579	0.803966357	0.820276832	0.822198723	0.823608862	0.838296722	0.828326964	0.827010851	0.823119099	0.850920713	0.87176501	0.875016864	0.877875423	0.909939899	0.935548284	0.940271756	0.982618367
15:27:16.042	0.890716803	0.87807131	0.8124656	0.829237331	0.833190894	0.834633378	0.85339409	0.844659919	0.844594535	0.843601024	0.872787033	0.894648038	0.898057196	0.900926791	0.930516962	0.948640383	0.953527828	0.992218231
15:27:16.992	0.886416614	0.885317005	0.812517158	0.82929022	0.833301336	0.834791672	0.853841394	0.845066139	0.844936003	0.84385688	0.873363402	0.895223236	0.898595028	0.901475077	0.931088309	0.948924548	0.95383897	0.992420923
15:27:17.942	0.884419126	0.886923007	0.8128238	0.829643854	0.833678242	0.835166006	0.854344271	0.845682032	0.845600477	0.844625372	0.874126548	0.896053949	0.89944087	0.902267803	0.931809422	0.949350104	0.954107139	0.992738569
15:27:18.893	0.88668022	0.887265738	0.812936766	0.829692941	0.833803502	0.835319659	0.854532705	0.845828272	0.845744386	0.844783127	0.874336088	0.896247037	0.89968687	0.902501583	0.931972993	0.949424222	0.95425422	0.992806465
15:27:19.930	0.885895021	0.88492928	0.812889593	0.829739733	0.833799275	0.835361183	0.854517234	0.845870854	0.845762845	0.844859626	0.874480163	0.896277312	0.899784708	0.902530344	0.932079834	0.949527609	0.954495943	0.992949003
15:27:20.880	0.885140441	0.88253191	0.812949323	0.82961707	0.833730577	0.835254583	0.854318339	0.845593531	0.845513728	0.84446306	0.874158854	0.896012965	0.899403219	0.902173869	0.931762596	0.9492347	0.954231974	0.992655295
15:27:21.830	0.885870708	0.885807133	0.812861604	0.829614111	0.833603819	0.835111434	0.854202553	0.845458249	0.845307407	0.844330205	0.873941487	0.8957721	0.899215555	0.90204036	0.931643614	0.949273611	0.954284165	0.992729217
15:27:22.867	0.886359095	0.886697599	0.812929334	0.829635127	0.833570825	0.835093813	0.854065533	0.845313608	0.845215742	0.844198384	0.873783698	0.895631718	0.89914596	0.901954147	0.931652268	0.949415285	0.954497673	0.992989778
15:27:23.818	0.886476157	0.884019942	0.812872033	0.829624182	0.833541004	0.835117289	0.853998823	0.845217516	0.845067056	0.844066682	0.873658258	0.895601796	0.899067588	0.901857613	0.931627519	0.949501934	0.954607953	0.993081516
15:27:24.768	0.885300812	0.884837338	0.8129186	0.829584598	0.833548218	0.835133466	0.854005906	0.845244029	0.845093184	0.844169434	0.8738094	0.895682766	0.899254282	0.901975472	0.931875473	0.949848658	0.9549015	0.993458189
15:27:25.805	0.885910373	0.883831219	0.81293878	0.829645265	0.83360948	0.835125444	0.854018054	0.845251532	0.845034111	0.844051126	0.873739009	0.895604666	0.899122915	0.901864103	0.93175388	0.949711166	0.954670047	0.993294194
15:27:26.755	0.886679705	0.886240898	0.813011816	0.829667519	0.833621565	0.835154942	0.853969896	0.845197052	0.844910915	0.843986647	0.873576115	0.895450011	0.898882581	0.901674804	0.931424996	0.949276862	0.954202841	0.992830085
15:27:27.706	0.886696053	0.885817473	0.813072368	0.829826968	0.833742981	0.835258519	0.854064923	0.845336561	0.845045798	0.844032242	0.87374461	0.895597231	0.899111932	0.901783117	0.931546757	0.949333367	0.954172344	0.992835641
15:27:28.656	0.886144926	0.888713977	0.8131694	0.829938771	0.833925282	0.835436191	0.8543152	0.845594109	0.845357934	0.844258874	0.873997761	0.89582929	0.899371874	0.902051067	0.93170662	0.94935859	0.954210808	0.992823766
15:27:29.693	0.88653595	0.883196336	0.813356173	0.830119943	0.834098259	0.835605144	0.854565296	0.84583456	0.845574916	0.844471099	0.874260726	0.89619498	0.899599652	0.902295309	0.931896994	0.949405876	0.954093176	0.992792877
15:27:30.643	0.887064931	0.88603213	0.813469934	0.830288234	0.834254883	0.83576696	0.854765906	0.846030979	0.845742921	0.844531912	0.87447923	0.896332453	0.899744504	0.902411075	0.931909225	0.949227951	0.953931713	0.992540103
15:27:31.594	0.886976438	0.887672502	0.81358406	0.830422723	0.834467213	0.835958549	0.855024397	0.846390184	0.846173275	0.844943138	0.87496156	0.896854282	0.900202788	0.903015098	0.932480759	0.949713509	0.954443912	0.992981936
15:27:32.630	0.886363443	0.884447619	0.813666409	0.830483501	0.834614698	0.836168951	0.855330893	0.846662585	0.846469129	0.845256811	0.875404909	0.897365053	0.900781638	0.9035492	0.933197751	0.950397318	0.955179365	0.993791811
15:27:33.581	0.888048388	0.886601734	0.813820087	0.830584484	0.834681138	0.836267518	0.855381983	0.846741559	0.846515757	0.84522602	0.875659559	0.897530048	0.900921752	0.903717802	0.933444794	0.950671608	0.955488312	0.994051366
15:27:34.531	0.887419069	0.887253694	0.813856419	0.830601378	0.834735843	0.836320276	0.855444925	0.846834432	0.846611936	0.845340245	0.8757393	0.897639344	0.901039484	0.903768097	0.933606442	0.950892676	0.955626775	0.994188581
15:27:35.568	0.886391428	0.886282058	0.813883179	0.830614281	0.834725825	0.836261454	0.855438039	0.846745065	0.846448752	0.84523362	0.875620476	0.897523778	0.900928899	0.903684084	0.933485021	0.950802679	0.955645994	0.994154685
15:27:36.518	0.886146576	0.885501206	0.813807733	0.830664552	0.834688793	0.836245486	0.855277524	0.846607087	0.846342869	0.845127318	0.875424292	0.897281935	0.900718408	0.903489163	0.933262746	0.950585355	0.955420762	0.993941707
15:27:37.469	0.88766066	0.887158427	0.81394655	0.83064239	0.834655436	0.836191868	0.855169722	0.846487071	0.846244366	0.844844086	0.875234451	0.897007967	0.900416588	0.90314078	0.932905864	0.950195984	0.955092711	0.993585781
15:27:38.419	0.88639526	0.883235738	0.8138722	0.830667472	0.834637846	0.836208217	0.855075208	0.846456893	0.846113798	0.844878402	0.87503922	0.896838776	0.90021877	0.902986904	0.932667787	0.949927029	0.954708237	0.993311029
15:27:39.456	0.887024115	0.888430556	0.81398741	0.83075128	0.834742639	0.8363053	0.855188739	0.846563486	0.846286696	0.844878634	0.875144791	0.89697313	0.900360525	0.903088878	0.932837185	0.950100728	0.954884758	0.993423019
15:27:40.406	0.886407029	0.886618956	0.813947428	0.830724557	0.834674027	0.836197423	0.855016009	0.846315963	0.845996605	0.844615265	0.87468107	0.896477762	0.899820861	0.902478776	0.932153156	0.949338678	0.954044004	0.992614827
15:27:41.443	0.886640357	0.8885089	0.814056131	0.830816677	0.83474471	0.836242734	0.855092356	0.846419524	0.846094398	0.844791738	0.874830657	0.896632983	0.899986728	0.902762206	0.932403752	0.94974766	0.954489276	0.993055295
15:27:42.394	0.88688754	0.888844001	0.814080277	0.830808695	0.834793361	0.836276858	0.85508912	0.846392368	0.846119708	0.844722617	0.874768025	0.896612728	0.899982418	0.902728531	0.932492243	0.949910295	0.954719852	0.993265954
15:27:43.344	0.886887179	0.885599786	0.814056389	0.830823352	0.834733331	0.836285148	0.85494966	0.84624975	0.845915556	0.844442691	0.874550963	0.896305643	0.899716062	0.902388214	0.932166161	0.949600102	0.954515934	0.993015873
15:27:44.294	0.887810105	0.885957106	0.814150521	0.830782823	0.834706734	0.836145609	0.854814467	0.846115163	0.845786044	0.844302386	0.874328771	0.89616095	0.899491132	0.902272781	0.932039887	0.949677306	0.954483096	0.993067622
15:27:45.331	0.886702099	0.885728429	0.814117509	0.830811995	0.834658744	0.836154516	0.854743218	0.845991168	0.845606724	0.844198699	0.874174402	0.895956571	0.899352021	0.902086014	0.931984417	0.949761607	0.954659207	0.993217623
15:27:46.282	0.887102136	0.886707583	0.814018738	0.830740548	0.834534225	0.836019292	0.854479287	0.845672681	0.845256988	0.843774477	0.873696843	0.8954579	0.898769723	0.901437439	0.931373092	0.949153216	0.954048685	0.99263554
15:27:47.232	0.887980728	0.888257448	0.814047502	0.830745683	0.834489635	0.836041323	0.854315032	0.845497434	0.845110308	0.843506898	0.873427646	0.895188241	0.898549222	0.901260219	0.931172859	0.949050317	0.953959356	0.992597461
15:27:48.269	0.885912348	0.88629246	0.814068514	0.830676208	0.834386992	0.835960439	0.854213066	0.845356835	0.844902359	0.843326307	0.873304578	0.895085622	0.898398681	0.901195557	0.931143075	0.949207483	0.954147557	0.992794773
15:27:49.219	0.886794393	0.884212377	0.813980657	0.830642774	0.834272668	0.8358507	0.853939389	0.845081911	0.844590801	0.842997088	0.872763257	0.894512451	0.897796819	0.900659706	0.930515391	0.948570853	0.953587464	0.992221121
15:27:50.170	0.888056241	0.884830941	0.814077915	0.830643661	0.834262786	0.835802755	0.853864646	0.844963344	0.844461153	0.842781147	0.872561037	0.894339337	0.897667657	0.90049357	0.930415633	0.948623064	0.953660939	0.992301293
15:27:51.120	0.88614776	0.885302053	0.814001846	0.830635952	0.834199736	0.835730362	0.853658102	0.844754128	0.84425445	0.842569158	0.872189288	0.893998658	0.897266988	0.90011489	0.929995743	0.94827865	0.953427474	0.991993608
15:27:52.157	0.88705281	0.886539765	0.813951021	0.83063952	0.83411287	0.835662971	0.853508382	0.844564382	0.844041059	0.842305154	0.871855735	0.893589196	0.896927052	0.899727741	0.929587134	0.947981189	0.953077421	0.9917377
15:27:53.107	0.887245148	0.884304656	0.814003841	0.830618555	0.834063365	0.83559137	0.853343481	0.844319494	0.843766385	0.84211902	0.871505572	0.893284971	0.896576103	0.899312633	0.929187246	0.947729293	0.952921879	0.991540992
15:27:54.058	0.888073413	0.888438115	0.813974715	0.830579225	0.834014633	0.835542811	0.853199547	0.844214844	0.843662887	0.841844993	0.871321313	0.893025069	0.896373956	0.899140998	0.929072918	0.947810979	0.953012615	0.991680468
15:27:55.094	0.887290153	0.889656887	0.813980945	0.830508237	0.833898267	0.835410482	0.852939042	0.843871984	0.843183687	0.841477816	0.870741737	0.892478423	0.895793854	0.898527919	0.928481507	0.947307553	0.952585461	0.991270231
15:27:56.045	0.887169144	0.887313033	0.813858875	0.830461064	0.833777359	0.835354133	0.852724663	0.843616151	0.842997195	0.841178483	0.87039649	0.892063271	0.895457737	0.898157496	0.928221311	0.947287143	0.952631288	0.991383566
15:27:56.995	0.887306373	0.88486013	0.813912433	0.830345656	0.83356754	0.835180654	0.852337566	0.84321735	0.842466937	0.840660847	0.869731999	0.891343016	0.89478813	0.897454687	0.927664507	0.947029369	0.952494286	0.99124566
15:27:58.032	0.887738985	0.88615945	0.813576457	0.830220093	0.833337018	0.834876219	0.851826243	0.842603932	0.841775442	0.840071791	0.868854355	0.890454678	0.893810682	0.896588564	0.926898305	0.946602586	0.952162182	0.990947751
15:27:58.982	0.886605733	0.883034647	0.813545528	0.830034107	0.83303776	0.834487256	0.851258202	0.841918951	0.841115946	0.839378741	0.867801363	0.889396428	0.892629368	0.895579872	0.925812054	0.945724395	0.951339878	0.990226745
15:27:59.933	0.887923264	0.882909187	0.813326622	0.829873694	0.832774082	0.834271932	0.850818472	0.841376767	0.840462399	0.838649354	0.867056287	0.888589987	0.891861027	0.89472408	0.925134855	0.945312096	0.95112388	0.989940435
15:29:15.446	0.893076861	0.884245537	0.820135985	0.836839193	0.840987643	0.842269734	0.860745683	0.851923782	0.851679032	0.850919069	0.880145476	0.901893946	0.904984989	0.907916229	0.936648144	0.952885687	0.95814097	0.99560564
15:29:16.397	0.892762785	0.890043468	0.820074845	0.836820423	0.840834038	0.842424383	0.860931827	0.851950202	0.851572107	0.850542054	0.880136097	0.901725728	0.905025404	0.907736621	0.936663708	0.952835117	0.958239	0.995579378
15:29:17.347	0.893495736	0.892275589	0.820196591	0.83692976	0.840846168	0.842405091	0.860816507	0.851837876	0.85141734	0.850318598	0.879817317	0.901393938	0.904678126	0.907300894	0.936290561	0.95241502	0.957859598	0.995162854
15:29:18.384	0.892420676	0.890336476	0.820227172	0.836941053	0.840960665	0.842516574	0.860846252	0.851875742	0.851472033	0.850355854	0.879934898	0.901571138	0.904894322	0.907550386	0.936576349	0.952904748	0.958393856	0.995770486
15:29:19.334	0.892466373	0.888662814	0.820160618	0.836906494	0.840815415	0.842390962	0.860637009	0.851620629	0.851289474	0.850074928	0.879559425	0.901124877	0.904416596	0.907087372	0.936162177	0.952581579	0.958080902	0.995444064
15:29:20.285	0.892451488	0.890972914	0.820191152	0.836868451	0.840751298	0.842334723	0.860430188	0.851373124	0.850908582	0.849771121	0.879189279	0.900720806	0.904066697	0.90669435	0.935854269	0.952337849	0.957785503	0.995282313
15:29:21.322	0.893013308	0.892944171	0.820151433	0.836815591	0.840515841	0.842141735	0.860085133	0.850987888	0.850488556	0.849269554	0.878638648	0.900129149	0.903392886	0.906157313	0.935205211	0.951746946	0.957232585	0.994738331
15:29:22.272	0.893277034	0.891438489	0.820022913	0.836737904	0.840426312	0.841976429	0.859869795	0.850720077	0.850249593	0.848862431	0.87824497	0.899761342	0.902986866	0.90572254	0.934889365	0.951577744	0.957126978	0.994639469
15:29:23.222	0.892547741	0.888805632	0.819972604	0.836632416	0.840284115	0.841803017	0.859564479	0.850379926	0.849889232	0.848413523	0.877773483	0.899302003	0.902465846	0.905262223	0.934438087	0.951268609	0.95690529	0.994384404
15:29:24.259	0.893221878	0.889040523	0.819933807	0.836507312	0.840146392	0.841662973	0.85926787	0.850075072	0.849541339	0.847919883	0.877307332	0.898834298	0.902029261	0.904851533	0.934086282	0.951135693	0.956815798	0.994343467
15:29:25.210	0.893283631	0.890123129	0.81971933	0.836400845	0.839875644	0.841479473	0.858831601	0.849547594	0.84893451	0.847330499	0.8765001	0.897996872	0.901238092	0.903987582	0.933153084	0.950324199	0.956166199	0.993563605
15:29:26.160	0.892333915	0.89126744	0.819703799	0.836346568	0.839773432	0.84131916	0.858598507	0.849263379	0.84861611	0.846993006	0.876094501	0.897594075	0.900888762	0.903600142	0.932886899	0.95031673	0.956090802	0.993688122
15:29:27.197	0.891760995	0.890422251	0.819668552	0.83622517	0.839628244	0.841150508	0.858284676	0.84893981	0.848279811	0.84652012	0.87555916	0.897092921	0.900446656	0.903053229	0.932474415	0.950009543	0.955759558	0.993437333
15:29:28.147	0.893416846	0.88912629	0.819539175	0.836161114	0.839482621	0.841006186	0.858041755	0.848637348	0.847916402	0.846096381	0.875141484	0.89663409	0.899960527	0.902670717	0.932101635	0.949796186	0.955577166	0.993309439
15:29:29.098	0.893065771	0.891083577	0.819542154	0.836124309	0.839345014	0.840954276	0.857861193	0.848430912	0.847641686	0.845872596	0.874874348	0.896460287	0.899793432	0.902438883	0.932035103	0.949922925	0.95572288	0.99355614
15:29:30.048	0.891568881	0.890362803	0.819446851	0.835997144	0.839212598	0.840821155	0.857589405	0.848147512	0.8474006	0.845470504	0.874480163	0.896037362	0.899231762	0.901992937	0.931545216	0.949542115	0.955404528	0.993218938
15:29:31.085	0.891073755	0.888740996	0.81934405	0.835961057	0.839207087	0.840731563	0.857447955	0.848006262	0.847260512	0.845429993	0.87436311	0.895918173	0.899228411	0.901921169	0.93162109	0.949755165	0.955613097	0.993453165
15:29:32.035	0.890870388	0.888122654	0.819424544	0.835980401	0.839123073	0.840628929	0.857343746	0.8478637	0.84705787	0.845204722	0.874158832	0.895726176	0.899024265	0.901724413	0.93149777	0.949712708	0.955611837	0.993468411
15:29:32.986	0.891640498	0.888598715	0.819279127	0.835868977	0.838987582	0.840473231	0.857127898	0.847577743	0.846805637	0.844890501	0.873718984	0.895313655	0.898562631	0.901264062	0.931048761	0.949315794	0.955180345	0.993081623
15:29:34.022	0.891572255	0.890483506	0.819362225	0.835834562	0.838842197	0.840410434	0.856863156	0.8473104	0.846434231	0.844465356	0.873423906	0.894879886	0.898194116	0.900865538	0.930649684	0.948958071	0.954811134	0.992731021
15:29:34.973	0.891596228	0.889457506	0.819262525	0.835792583	0.838768348	0.840326199	0.856698254	0.847144207	0.846247725	0.844387711	0.873170349	0.89466545	0.897950109	0.900501764	0.930409615	0.948718944	0.954561789	0.992550548
15:29:35.923	0.891298746	0.89022756	0.819228837	0.835667825	0.838642099	0.840255033	0.856480718	0.846878896	0.845996198	0.843956517	0.872804939	0.894198465	0.897490702	0.900063177	0.929908971	0.948296282	0.954107531	0.992021602
15:29:36.960	0.891478731	0.888865859	0.819286649	0.835692774	0.838640929	0.840238452	0.856421732	0.846865119	0.84602963	0.843995859	0.87282219	0.894250843	0.897528645	0.900157168	0.930037333	0.948496259	0.954336263	0.992293306
15:29:37.910	0.89047467	0.887458115	0.819298112	0.835732767	0.838658034	0.840227279	0.85653375	0.846919128	0.84595545	0.844019704	0.87286751	0.894318457	0.897634747	0.900165618	0.93017766	0.948667594	0.954593096	0.992546999
15:29:38.861	0.891854493	0.890780513	0.819399443	0.835840422	0.838754765	0.840326646	0.856571185	0.84704479	0.846156794	0.844151107	0.873031011	0.894532348	0.897817042	0.900492978	0.93040413	0.948948248	0.954743884	0.992805962
15:29:39.811	0.891124774	0.892648346	0.819343416	0.835776966	0.838748076	0.84035427	0.856544206	0.847007119	0.846185574	0.844095193	0.8729312	0.894446674	0.897732711	0.900324607	0.93026971	0.94869322	0.954481483	0.992521795
15:29:40.848	0.891714486	0.891694344	0.819338048	0.835858067	0.83881262	0.840346389	0.856658192	0.847126214	0.846264475	0.844286027	0.873074289	0.894565745	0.897870709	0.900517982	0.930384772	0.948753621	0.954499577	0.992532628
15:29:41.798	0.892248373	0.890696555	0.819585476	0.835999158	0.838979841	0.84048266	0.856802368	0.847277739	0.846400301	0.844496508	0.873250976	0.894811913	0.898058343	0.900826025	0.930541261	0.948798554	0.954528268	0.992545608
15:29:42.749	0.89147996	0.89022897	0.819617842	0.836056166	0.839053151	0.840614422	0.85693835	0.847419189	0.846576972	0.844624416	0.873504591	0.895026654	0.898308775	0.901004495	0.930780277	0.94905872	0.954761993	0.992732204
15:29:43.786	0.891844601	0.891617157	0.819682342	0.836161412	0.839187859	0.840715016	0.857070057	0.847618188	0.846742784	0.844905587	0.873803043	0.895293889	0.898522018	0.901203049	0.931023725	0.949169918	0.954876329	0.992862608
15:29:44.736	0.892456186	0.89108867	0.819796048	0.836256678	0.839329983	0.840845238	0.857251657	0.847784311	0.846930405	0.845078956	0.874036016	0.895515432	0.898690623	0.901543339	0.931197116	0.949323334	0.954968314	0.992933843
15:29:45.686	0.892997419	0.890442756	0.81988746	0.836283335	0.839434184	0.840911509	0.857345974	0.847925854	0.847099131	0.845274321	0.874195689	0.895660511	0.898771665	0.901608847	0.931286392	0.949315999	0.954951574	0.992899023
15:29:46.723	0.892611227	0.893089732	0.819978131	0.836455053	0.839514478	0.841003773	0.857519083	0.848054162	0.847193879	0.84552701	0.874366513	0.895827374	0.898947393	0.901793239	0.931452429	0.949368501	0.954996749	0.992957403
15:29:47.674	0.892151909	0.890012959	0.820143713	0.836580458	0.839771216	0.841322612	0.857837669	0.848454169	0.847620784	0.845974239	0.874918655	0.896382499	0.899605021	0.90236453	0.93213694	0.950056903	0.955774049	0.993703343
15:29:48.624	0.892975897	0.889315105	0.820206535	0.836713966	0.839821617	0.841385214	0.857943271	0.848597789	0.847726829	0.846162016	0.875099563	0.896601805	0.899829558	0.902533681	0.932280664	0.950206289	0.955881604	0.993798506
15:29:49.574	0.892573991	0.894047495	0.82025283	0.836710117	0.839875184	0.841367858	0.858017164	0.848598498	0.84773022	0.846157892	0.875026885	0.896413012	0.899717053	0.902430039	0.932009862	0.949783051	0.955430285	0.993311858
15:29:50.611	0.892281961	0.893326039	0.820409973	0.836796899	0.83995032	0.841491232	0.858059968	0.848649539	0.847836893	0.846211295	0.875110801	0.896498831	0.899723723	0.902469123	0.932038879	0.949743051	0.955294752	0.993216728
15:29:51.562	0.892650012	0.891185237	0.820379903	0.836881211	0.840042582	0.841589348	0.858195321	0.848808616	0.847988064	0.846483495	0.875374974	0.896762701	0.900022694	0.902712568	0.932289732	0.94997938	0.955554187	0.993443127
15:29:52.512	0.893002418	0.892769875	0.820438352	0.836938555	0.840096212	0.841597324	0.858235672	0.848873526	0.848131366	0.846485491	0.875383952	0.896799971	0.899999455	0.902694749	0.932204737	0.949736665	0.955329931	0.993143778
15:29:53.549	0.892672858	0.893033728	0.820626903	0.837076548	0.840309266	0.841823098	0.858566109	0.849227801	0.848471776	0.846925066	0.875956373	0.897413678	0.900692048	0.90345106	0.932957925	0.950577816	0.956023913	0.9939873
15:29:54.499	0.892854966	0.89018678	0.820723591	0.837105506	0.840374367	0.841891539	0.858640728	0.849339315	0.8486524	0.847011359	0.876063723	0.897561384	0.900825504	0.903564198	0.93296669	0.950484937	0.955896673	0.993875605
15:29:55.450	0.894286398	0.89075567	0.820757676	0.837204979	0.840410749	0.84194036	0.858675405	0.849365039	0.848647409	0.847085303	0.876054427	0.897571365	0.900769668	0.903564526	0.932841796	0.950274085	0.955639472	0.993558415
15:29:56.486	0.89322152	0.889703803	0.820754832	0.837278726	0.840604057	0.842044219	0.858900967	0.849573476	0.848898088	0.847356635	0.876318392	0.897899855	0.90103627	0.903767423	0.933137913	0.950458816	0.955713741	0.993720923
15:29:57.437	0.893655894	0.894931295	0.820955519	0.837397924	0.840700004	0.842233698	0.859101155	0.84979031	0.849197661	0.847588486	0.876533345	0.898128291	0.901293697	0.904046506	0.933388391	0.950519775	0.955804118	0.993759799
15:29:58.387	0.894168579	0.890184229	0.821140223	0.837504681	0.840892728	0.842438146	0.859360471	0.850082034	0.849391329	0.847977665	0.876881109	0.898518539	0.901804685	0.904473726	0.93380964	0.950830212	0.956098692	0.994055461
15:29:59.338	0.89400673	0.895170877	0.821157639	0.837649799	0.841062759	0.842522041	0.859587848	0.850355488	0.849748583	0.848190445	0.877388249	0.898939316	0.902304481	0.904862875	0.934220448	0.951145677	0.956386906	0.994364034
15:30:00.374	0.893048307	0.892497773	0.82141273	0.837792115	0.841245775	0.84290203	0.859923688	0.850663314	0.850021536	0.848505077	0.877768123	0.899388179	0.902614128	0.905363126	0.934550393	0.951325443	0.95658352	0.994509291
15:31:15.974	0.901118236	0.897811497	0.825015113	0.840925598	0.844214203	0.845912306	0.8623709	0.852920488	0.852002428	0.850350785	0.879897863	0.90129035	0.904542026	0.907687163	0.936191744	0.951916788	0.957680985	0.994688288
15:31:17.011	0.897435898	0.895133662	0.824808025	0.841082352	0.844424306	0.845974247	0.862608495	0.853101517	0.85229142	0.850760437	0.880188794	0.901704337	0.904988568	0.907656864	0.936641236	0.952511088	0.957949259	0.99525106
15:31:17.962	0.89701369	0.895343273	0.825033691	0.84120962	0.844621769	0.846183	0.862808222	0.853270415	0.852453738	0.850785239	0.880374898	0.901990482	0.905332125	0.90793631	0.936921386	0.952889167	0.958285778	0.995648619
15:31:18.912	0.896828697	0.893619307	0.824908281	0.841217767	0.844460528	0.845967395	0.862535487	0.852913227	0.852118525	0.8504122	0.879727092	0.901238901	0.904516219	0.907162707	0.936019114	0.951849386	0.957156406	0.994500361
15:31:19.949	0.89741173	0.897110494	0.824980992	0.841146238	0.844384565	0.84593924	0.862390986	0.85271849	0.851917254	0.850200152	0.879483122	0.900899976	0.904148402	0.906784627	0.935656058	0.951496844	0.956592494	0.994090166
15:31:20.899	0.896649804	0.894240402	0.824980509	0.841195682	0.844478903	0.846000927	0.862478897	0.852848883	0.852076385	0.850359318	0.879649056	0.901161257	0.904425197	0.907045805	0.936036096	0.951982851	0.957171092	0.994678737
15:31:21.850	0.896330307	0.897170255	0.824916001	0.841146823	0.844331653	0.845842805	0.862165814	0.852566346	0.851758463	0.84992811	0.879173879	0.90060217	0.903859111	0.906493022	0.935406311	0.95136092	0.956528114	0.994046625
15:31:22.886	0.89653373	0.893844754	0.824946663	0.841200712	0.844366032	0.845888611	0.862213251	0.8525208	0.851609239	0.849888629	0.879113924	0.900576894	0.903823663	0.906498978	0.935496444	0.951527182	0.956682636	0.994243754
15:31:23.837	0.897046657	0.894180154	0.824936081	0.841220327	0.844357504	0.845889748	0.862155178	0.852473804	0.851625457	0.849812337	0.879090405	0.900528926	0.903824071	0.906464184	0.935543095	0.951703581	0.956923373	0.994527655
15:31:24.787	0.896483831	0.896429777	0.824968703	0.841125957	0.844260825	0.845830703	0.861926759	0.852265127	0.851410948	0.849512212	0.87878607	0.900241029	0.903472938	0.90618761	0.935238903	0.951456031	0.956615113	0.994253368
15:31:25.824	0.896961529	0.893217729	0.824910181	0.841065371	0.844180462	0.845669045	0.861781405	0.85205833	0.851106039	0.849184796	0.878442354	0.899913416	0.90317216	0.905847981	0.934907022	0.951223476	0.95643891	0.994049876
15:31:26.774	0.896685677	0.895270288	0.824901535	0.841022904	0.844066965	0.845654434	0.861643796	0.851874942	0.850925995	0.849066775	0.878192355	0.899632612	0.902885531	0.905659248	0.934700831	0.951135443	0.956387623	0.994030977
15:31:27.725	0.896976364	0.895434922	0.82482411	0.841033066	0.844011733	0.845588114	0.8615068	0.85175188	0.850778912	0.848902319	0.878086482	0.899577709	0.902835506	0.905474657	0.934772627	0.951413434	0.956795072	0.994444547
15:31:28.675	0.896512311	0.895436453	0.824793191	0.840944866	0.843905308	0.845414237	0.861233409	0.851409451	0.850415725	0.848477283	0.877580859	0.899071484	0.90234318	0.905091655	0.934288284	0.951003382	0.956510707	0.994099614
15:31:29.712	0.896377	0.893692239	0.824764515	0.84089389	0.843761744	0.845304629	0.861012402	0.851161986	0.850147508	0.848179658	0.877187316	0.898638244	0.901937556	0.90465445	0.933913833	0.950789723	0.956178124	0.993834011
15:31:30.662	0.896803106	0.893393776	0.824672423	0.840747924	0.843653447	0.845122298	0.860807856	0.850939735	0.849850215	0.847862179	0.876864829	0.898305587	0.90166194	0.904312485	0.933554969	0.950516507	0.955947803	0.993600524
15:31:31.613	0.896520335	0.895139491	0.824667526	0.840800477	0.84361785	0.845142086	0.860709099	0.850860853	0.849785582	0.84783406	0.876755772	0.898269266	0.90155464	0.904251291	0.933604675	0.9506186	0.956134823	0.993810544
15:31:32.650	0.896789765	0.891937443	0.824653477	0.840751779	0.843560478	0.845052059	0.860560078	0.850641994	0.84944948	0.847554473	0.876421316	0.897864333	0.901266899	0.90383251	0.933195132	0.95025978	0.955738254	0.993414346
15:31:33.600	0.896626633	0.893981906	0.824630548	0.840690276	0.843458069	0.84500091	0.860368147	0.850417895	0.849313336	0.847374385	0.87616252	0.897574182	0.900922125	0.903640732	0.932856508	0.949978526	0.955444628	0.993120645
15:31:34.550	0.896644094	0.895349907	0.824638688	0.84061366	0.843356142	0.844901395	0.86017507	0.850200741	0.849018737	0.84701183	0.875726162	0.897165886	0.900460839	0.903112003	0.932335013	0.949448279	0.954956721	0.992535423
15:31:35.587	0.897177301	0.895798507	0.82463882	0.840691001	0.84336861	0.844927129	0.86027476	0.850288509	0.849123675	0.847186982	0.875876772	0.897376098	0.900659265	0.903339119	0.932683998	0.949862638	0.955488056	0.993092517
15:31:36.538	0.895068092	0.894540488	0.824619151	0.840706761	0.843350509	0.844938393	0.860192211	0.850195462	0.849038418	0.846923603	0.875695499	0.897133011	0.900437417	0.903090089	0.932409762	0.949644935	0.955298707	0.992828363
15:31:37.488	0.89722845	0.894834609	0.824690284	0.840780376	0.843359831	0.844930824	0.860215451	0.850213175	0.849005043	0.846842603	0.875680491	0.897053863	0.900398508	0.903047349	0.93233623	0.949548194	0.955211601	0.992760798
15:31:38.438	0.89653883	0.896282153	0.824792628	0.840737301	0.843445009	0.84492499	0.860185659	0.850232163	0.849078318	0.846935149	0.875751592	0.897107106	0.900451383	0.903155475	0.932434206	0.94968006	0.955423825	0.992908196
15:31:39.475	0.897027166	0.89633028	0.824842325	0.840841936	0.843447744	0.845040523	0.860209098	0.85019471	0.849039802	0.846840652	0.875700035	0.897085067	0.900358145	0.903054333	0.932370175	0.949626725	0.955454173	0.992895951
15:31:40.426	0.896937975	0.894944959	0.824750441	0.840883884	0.843442133	0.845025138	0.860181602	0.850165781	0.849063352	0.846818281	0.875635598	0.897015074	0.900319796	0.903022	0.932334602	0.949603509	0.955455687	0.992874764
15:31:41.376	0.896582394	0.894283259	0.824771478	0.840855951	0.843409255	0.845057922	0.860099417	0.850047065	0.848824274	0.846702661	0.875420226	0.896812422	0.900126867	0.90282065	0.932119595	0.949386815	0.955295746	0.992622927
15:31:42.413	0.896144331	0.895061144	0.824967822	0.84098634	0.843590851	0.845176134	0.860307328	0.850303433	0.849172549	0.847012411	0.875872577	0.897310218	0.900602035	0.903277871	0.932805483	0.950147925	0.956145207	0.993470037
15:31:43.363	0.89751798	0.89597002	0.824973662	0.840921904	0.843605152	0.845193176	0.860324291	0.850315864	0.849185717	0.846973857	0.875903123	0.897273647	0.900567685	0.903228089	0.932775329	0.950092087	0.956176461	0.993385479
15:31:44.314	0.896864708	0.893796281	0.825008937	0.841034045	0.843666343	0.845210418	0.860383465	0.850360152	0.849269836	0.84701108	0.875948097	0.897333094	0.900606181	0.903320199	0.932792249	0.950145825	0.956196079	0.993380961
15:31:45.350	0.897384818	0.893895813	0.825090707	0.841067412	0.843722143	0.845294963	0.860434089	0.850409528	0.849248818	0.846966041	0.875958517	0.897349614	0.900660208	0.90322853	0.932781675	0.950071265	0.956117095	0.99328341
15:31:46.301	0.897205661	0.894309361	0.825131646	0.841174812	0.843799654	0.845377931	0.860617753	0.850582421	0.84945611	0.847183398	0.876230234	0.897642514	0.901024408	0.903483697	0.933076243	0.950414257	0.956429402	0.993595852
15:31:47.251	0.896477414	0.896403858	0.825208861	0.841303081	0.84391656	0.845552367	0.860753938	0.850781222	0.84957025	0.847399739	0.876462725	0.897962198	0.901328529	0.903906634	0.93335316	0.950607287	0.956655757	0.993783106
15:31:48.202	0.897181816	0.896407509	0.825288438	0.841375806	0.844109304	0.845651647	0.860934811	0.85095971	0.849784867	0.847557648	0.87667009	0.898199809	0.901503237	0.904115953	0.933441497	0.950606107	0.956639747	0.993722386
15:31:49.238	0.897601372	0.897052079	0.825458034	0.841460839	0.844252283	0.845817049	0.861180825	0.851212475	0.850046435	0.847890434	0.876977451	0.898504033	0.901788498	0.904414686	0.933660241	0.950687564	0.956685494	0.993749261
15:31:50.189	0.898117175	0.897316339	0.825603829	0.841667043	0.844493971	0.846016223	0.861482048	0.851516635	0.850337923	0.848249081	0.87738519	0.898846365	0.902250442	0.904843088	0.934050836	0.95091899	0.957085685	0.993978383
15:31:51.139	0.897959954	0.894670331	0.825725204	0.841799506	0.844631622	0.846189245	0.861748702	0.851832754	0.850662419	0.848708043	0.87777282	0.899237038	0.90261798	0.905191479	0.934357468	0.951123403	0.957355431	0.994119351
15:31:52.176	0.897094589	0.897729726	0.825898451	0.841984915	0.844830481	0.846354522	0.861995597	0.852063428	0.850923445	0.848892514	0.878021944	0.899414323	0.90281006	0.905485027	0.934460774	0.951041555	0.95732699	0.993913494
15:31:53.126	0.897734154	0.896984084	0.825889204	0.842049848	0.844965791	0.846416525	0.862194765	0.852238942	0.851027234	0.849058597	0.878256855	0.899618941	0.902987054	0.905605561	0.934582324	0.951041039	0.957168543	0.993850177
15:31:54.077	0.898268361	0.897547113	0.826075323	0.842176672	0.845144587	0.846622545	0.86240787	0.852525848	0.851365473	0.849397656	0.878541012	0.899968035	0.903303078	0.906016442	0.934936953	0.951216074	0.957398734	0.993989798
15:31:55.114	0.897995676	0.89565086	0.826113721	0.842256633	0.845218409	0.846721773	0.862540793	0.852633946	0.851458354	0.84952182	0.878766694	0.900169134	0.903444193	0.906120032	0.935043357	0.951183736	0.957317217	0.993882729
15:31:56.064	0.897246938	0.898032085	0.826281071	0.842367134	0.845436915	0.847060715	0.862918979	0.85303415	0.851929335	0.850127332	0.879297974	0.900819291	0.904144845	0.906770626	0.935780937	0.951913301	0.958090217	0.994616749
15:31:57.014	0.899350293	0.896725023	0.82629351	0.842502776	0.845543337	0.847039217	0.862990304	0.853166652	0.852022923	0.850239239	0.879432141	0.900915069	0.904256907	0.906857024	0.935812117	0.95187192	0.95800689	0.994476003
15:31:58.051	0.896036603	0.897087659	0.82642934	0.842650248	0.845691141	0.847287045	0.863241237	0.853447344	0.852353022	0.850579771	0.879857139	0.901378162	0.904709273	0.907351786	0.936325685	0.952365966	0.958388563	0.99499419
15:31:59.002	0.898081247	0.895848933	0.826439704	0.842732991	0.845848992	0.847319145	0.863400608	0.853574784	0.852388235	0.850752132	0.880027634	0.901555656	0.90484464	0.907500927	0.936452629	0.952365446	0.958338911	0.994950493
15:31:59.952	0.898583924	0.895668519	0.826639586	0.842843046	0.845922013	0.847515878	0.8635723	0.853743972	0.852619672	0.851002187	0.880250978	0.901751748	0.905042177	0.907744012	0.936621292	0.952457998	0.958386425	0.994999402
15:32:00.902	0.898970725	0.896728111	0.82681728	0.842988286	0.846182491	0.84772857	0.863886272	0.854137274	0.853004646	0.85146162	0.880764928	0.902421103	0.905613026	0.908256038	0.937221758	0.952983738	0.958846161	0.995543073
15:33:15.811	0.907162915	0.906817852	0.835266574	0.851935849	0.857706102	0.859040519	0.879930894	0.871487441	0.87161306	0.871451399	0.902689229	0.924375221	0.927328088	0.929636487	0.955752491	0.963927084	0.970224405	1.003844698
15:33:16.848	0.905095195	0.904674777	0.835314887	0.852071855	0.857806376	0.859403474	0.880132557	0.87164188	0.871778866	0.871680593	0.902733136	0.924611182	0.927507041	0.929931485	0.955921756	0.964154926	0.970346385	1.003777784
15:33:17.798	0.906123513	0.901431144	0.835593199	0.852294176	0.858102615	0.859641843	0.880478602	0.87198118	0.872003948	0.8720854	0.903145713	0.924945349	0.927831853	0.930142698	0.956149239	0.964184154	0.970420665	1.00373872
15:33:18.749	0.905775719	0.904157278	0.835758769	0.852483302	0.858245882	0.859818754	0.880748694	0.87228817	0.872254051	0.872415542	0.903503256	0.925308784	0.928258301	0.930562694	0.956647527	0.964670891	0.970898407	1.004221129
15:33:19.786	0.905183743	0.904039496	0.835856781	0.852542023	0.858279688	0.859916028	0.880777512	0.872306535	0.872406632	0.872368449	0.90352424	0.925233229	0.928122261	0.930455047	0.956480227	0.96441345	0.970721974	1.003917943
15:33:20.736	0.905613482	0.904115172	0.835978735	0.852619849	0.858469705	0.860075892	0.881065333	0.872619366	0.872544813	0.872740657	0.903896564	0.92577216	0.928680035	0.931186187	0.957112	0.965193226	0.971555566	1.004672953
15:33:21.686	0.906377153	0.903476742	0.836042889	0.852731889	0.858567833	0.860181537	0.881111024	0.872690549	0.87268192	0.872965651	0.904083299	0.925855259	0.928799383	0.931313401	0.957207036	0.965292465	0.971662224	1.004767612
15:33:22.637	0.90636187	0.904897276	0.836035158	0.852836095	0.858591927	0.860254204	0.881258877	0.872771855	0.872820793	0.873043254	0.904131214	0.926003348	0.928929846	0.931480829	0.957387965	0.965505196	0.971920929	1.004961649
15:33:23.674	0.905540276	0.903178433	0.836122341	0.852775303	0.858566669	0.860251169	0.881102905	0.872642876	0.872644836	0.872891895	0.903909395	0.925706823	0.928582188	0.931169304	0.957006984	0.965096382	0.971474316	1.004455515
15:33:24.624	0.906198437	0.905662461	0.836108936	0.852845693	0.858662714	0.860249154	0.881139867	0.872722478	0.872691781	0.872968943	0.904034962	0.925919642	0.928777848	0.93134053	0.95722251	0.965295573	0.97171533	1.004781368
15:33:25.574	0.906091347	0.905903418	0.83622188	0.852921759	0.85871875	0.860317256	0.881225005	0.872768299	0.872758389	0.872999071	0.904110289	0.925986482	0.928872138	0.931524626	0.957288731	0.965342868	0.971726927	1.004802997
15:33:26.611	0.906152419	0.904853859	0.836316466	0.852979677	0.858776414	0.860378223	0.881295273	0.872877663	0.872816983	0.873134176	0.904176468	0.926077969	0.928947643	0.931493921	0.957334106	0.965325813	0.971788113	1.004772053
15:33:27.562	0.906089888	0.903430992	0.836354887	0.85305582	0.858848646	0.860454429	0.881376594	0.872950249	0.872936975	0.873084961	0.904295691	0.926126498	0.928999054	0.931535277	0.957378113	0.965329345	0.971839487	1.004787587
15:33:28.512	0.906439257	0.907121668	0.836368077	0.853060913	0.858935491	0.860565312	0.881448949	0.873082266	0.873032968	0.873271256	0.904449357	0.926322703	0.929141282	0.931745684	0.957537067	0.96547335	0.972036173	1.004947994
15:33:29.549	0.906255189	0.901423282	0.83644304	0.853170058	0.858992298	0.860574014	0.881513162	0.873122878	0.873121769	0.873283276	0.90441496	0.926263575	0.929060476	0.931653704	0.957400568	0.965219179	0.971863564	1.004650833
15:33:30.499	0.905592265	0.903238264	0.836585646	0.853291489	0.85915566	0.860788055	0.881843134	0.873443083	0.873480962	0.873640385	0.904856684	0.926618163	0.929510075	0.931989743	0.957800915	0.965632291	0.972423825	1.005082323
15:33:31.450	0.906634751	0.905937023	0.836704645	0.853395966	0.859323023	0.860916614	0.881960841	0.873590654	0.873638793	0.873882495	0.905035461	0.92679521	0.929784185	0.932232638	0.958033812	0.965849838	0.972585275	1.005294533
15:33:32.486	0.907110638	0.903203068	0.836771698	0.853513867	0.859442581	0.861044537	0.882131367	0.87377934	0.873798795	0.87399335	0.905294378	0.927005943	0.930008157	0.932349523	0.958226126	0.965998062	0.972742358	1.00542639
15:33:33.437	0.906296347	0.905734258	0.836781152	0.853623241	0.859550356	0.861136712	0.882296875	0.87392871	0.873952729	0.874385057	0.905446475	0.927243103	0.930207882	0.932560761	0.958419595	0.966127222	0.972919704	1.005530567
15:33:34.387	0.907188121	0.90465925	0.836961323	0.853733623	0.859685161	0.861187115	0.882428475	0.874120487	0.874148133	0.874535397	0.905664381	0.927589018	0.930517995	0.93287189	0.958804788	0.966558443	0.973441209	1.006006485
15:33:35.424	0.905724249	0.904163252	0.837015466	0.853728584	0.859621011	0.86124405	0.882295244	0.873926134	0.873960606	0.87425451	0.905356267	0.927183868	0.930106376	0.932429225	0.958266593	0.965931288	0.972833437	1.005287287
15:33:36.374	0.90676791	0.90496457	0.837023349	0.853715763	0.859641437	0.861268987	0.882291983	0.873910503	0.873936058	0.874307908	0.905338612	0.927144385	0.930081583	0.932407312	0.958338144	0.9660479	0.972942049	1.005455528
15:33:37.325	0.907150565	0.903598416	0.836828546	0.853559375	0.859465179	0.86106358	0.881998458	0.873558979	0.873528547	0.873785311	0.904818884	0.926525451	0.92941959	0.931863688	0.957602059	0.965335666	0.972203569	1.004746561
15:33:38.275	0.906734847	0.903699845	0.836874057	0.853588111	0.859473209	0.86101036	0.881959865	0.873556171	0.873520108	0.873763298	0.904843964	0.926622746	0.929515761	0.931855071	0.957783447	0.965621864	0.972449596	1.005096852
15:33:39.312	0.907277794	0.903898115	0.836839573	0.853477389	0.859302638	0.860873978	0.881652237	0.873201079	0.873152387	0.873273574	0.904335257	0.925970984	0.928902116	0.931317579	0.957114453	0.964995383	0.971748221	1.004464359
15:33:40.262	0.907075566	0.906194646	0.83677406	0.853494443	0.85927124	0.860847027	0.881558754	0.873115368	0.873045076	0.87311473	0.904216259	0.925874073	0.928870893	0.931283944	0.957157188	0.9652268	0.972042947	1.004744076
15:33:41.213	0.90664274	0.905069367	0.836797781	0.853490309	0.859264108	0.860885016	0.881541797	0.873082374	0.873000782	0.873255957	0.904312014	0.926022821	0.929038225	0.931405162	0.957478867	0.965752577	0.972778443	1.005383363
15:33:42.250	0.907032863	0.904767067	0.8367269	0.853310773	0.859080603	0.860696688	0.881228009	0.872687017	0.872569149	0.872670258	0.903702034	0.925372081	0.928330116	0.930831903	0.956815083	0.96516472	0.972251404	1.004813387
15:33:43.200	0.905774126	0.902717757	0.836655261	0.853301269	0.858939069	0.860567155	0.880993737	0.872477957	0.872386734	0.872396507	0.903384453	0.925099494	0.928056128	0.930516044	0.956586484	0.965066142	0.972055421	1.004735523
15:33:44.150	0.907125745	0.904293536	0.836652312	0.853219314	0.858883725	0.860440449	0.880841636	0.872302919	0.872126364	0.872122142	0.903217523	0.924955022	0.927866637	0.930347291	0.956486244	0.965078026	0.97193232	1.004823881
15:33:45.101	0.907295545	0.904949574	0.836592408	0.853253489	0.858799925	0.860387692	0.880682688	0.872118118	0.872007623	0.872033927	0.902989367	0.924749065	0.927699387	0.930126901	0.956388828	0.965096464	0.972073879	1.004910262
15:33:46.138	0.906655738	0.903359925	0.83661363	0.853123896	0.858670683	0.860246409	0.880448338	0.871843561	0.871760454	0.871632674	0.902602715	0.924337221	0.927254732	0.92977477	0.955987929	0.964832768	0.971806711	1.004614694
15:33:47.088	0.906250129	0.903020444	0.836439457	0.853018646	0.858474637	0.860069355	0.880138009	0.871517587	0.871325084	0.87121671	0.902082388	0.923809381	0.926625528	0.929272752	0.955386453	0.964183727	0.971138658	1.004021639
15:33:48.038	0.906326934	0.904328462	0.836336695	0.852953477	0.85831619	0.859961436	0.879875907	0.87125909	0.871031201	0.870821088	0.901714639	0.923446452	0.926271029	0.928818177	0.954991541	0.963833427	0.97079798	1.003688066
15:33:49.075	0.906358815	0.905411291	0.836381745	0.852962653	0.858306999	0.859910537	0.879821853	0.871186667	0.870992866	0.870860775	0.901655684	0.923425096	0.926258882	0.928796529	0.955061553	0.964030803	0.970995483	1.003914127
15:33:50.026	0.904977989	0.903058683	0.83629552	0.852923414	0.85826733	0.859853369	0.8797029	0.87101776	0.870813926	0.870670806	0.901430288	0.923206829	0.92598641	0.928584547	0.954873076	0.963865597	0.970897053	1.003782853
15:33:50.976	0.905929744	0.904051176	0.836271526	0.852844819	0.858195386	0.859736501	0.879482164	0.870788406	0.870583269	0.870338751	0.901067346	0.922859365	0.925624172	0.928238865	0.954470622	0.963498643	0.970533673	1.003403511
15:33:52.013	0.906283117	0.905601779	0.836280863	0.852852502	0.858129664	0.859702843	0.879478865	0.870762169	0.870529075	0.870244239	0.901065002	0.922845667	0.925677532	0.928234424	0.954516614	0.963647645	0.970726381	1.003595868
15:33:52.963	0.906811505	0.903015041	0.83626176	0.85285532	0.85806503	0.859642846	0.879334865	0.87061056	0.870370467	0.87014773	0.900807132	0.922577892	0.925381096	0.927986654	0.954230597	0.963335333	0.9704036	1.003320943
15:33:53.914	0.905525439	0.90334046	0.836277494	0.852691564	0.857954527	0.859539048	0.879126408	0.870401252	0.870120758	0.869734689	0.900456269	0.922205061	0.925037076	0.927612135	0.95390449	0.963054597	0.970045334	1.003024342
15:33:54.864	0.906112735	0.906214938	0.836194354	0.852692756	0.857920059	0.85951516	0.879014197	0.870239196	0.869936011	0.869593108	0.900327873	0.922029534	0.924838963	0.927344923	0.953753682	0.962976318	0.969887364	1.002986687
15:33:55.901	0.905650397	0.903482198	0.836230802	0.852698448	0.857905335	0.859453937	0.878919814	0.870146151	0.869807258	0.869487869	0.900164076	0.921965759	0.924759167	0.927203605	0.953678276	0.963010466	0.969950028	1.003033882
15:33:56.851	0.905623113	0.904077231	0.836211641	0.852677824	0.8578137	0.859421893	0.878862377	0.870041041	0.869701317	0.869443624	0.900059628	0.921788047	0.924658979	0.927231082	0.953663591	0.963059113	0.970103749	1.003139924
15:33:57.802	0.905977457	0.903339527	0.83617403	0.852658759	0.857776458	0.859315768	0.878741958	0.869932856	0.869612471	0.869251595	0.899895652	0.921705816	0.924547733	0.927046961	0.953607153	0.963131639	0.970168765	1.003232615
15:33:58.838	0.906479066	0.904253584	0.836106949	0.852648197	0.857709879	0.859237096	0.878578198	0.869748071	0.869433033	0.86903575	0.899668015	0.921474622	0.924307344	0.926882457	0.953445092	0.963078656	0.970083589	1.003186684
15:33:59.789	0.904856064	0.90427478	0.836001814	0.852464932	0.857511722	0.859105441	0.878240601	0.869389442	0.868955995	0.868661362	0.899101848	0.920853136	0.923710446	0.92627095	0.952796382	0.962391851	0.969490898	1.002513617
15:35:15.734	0.910470398	0.916714906	0.839222545	0.855613631	0.860551468	0.862015563	0.880710427	0.871518352	0.871034077	0.870614091	0.900715107	0.922402543	0.925153227	0.927869794	0.954027764	0.963321051	0.971721847	1.003058856
15:35:16.685	0.908422487	0.905236518	0.839315254	0.855547969	0.860526859	0.862140809	0.88071867	0.871626701	0.871168837	0.870378103	0.900893971	0.922537427	0.925328015	0.927793816	0.954186828	0.963504753	0.971776912	1.00345644
15:35:17.722	0.908470404	0.905798038	0.839437816	0.855685989	0.860702658	0.862320007	0.880890669	0.871775214	0.871304891	0.870544013	0.901027286	0.922674975	0.92551207	0.927986262	0.954392556	0.963772974	0.972088411	1.003736299
15:35:18.672	0.908306222	0.907301538	0.839396159	0.855689965	0.860581936	0.862206488	0.88070211	0.871586958	0.871118841	0.870288431	0.900729144	0.922327906	0.925166521	0.927651491	0.95399514	0.963352847	0.971633206	1.003321961
15:35:19.622	0.909128982	0.905137902	0.839522044	0.855725351	0.860696027	0.862320926	0.880871571	0.871702528	0.871228112	0.870534065	0.900923341	0.922561867	0.925465756	0.927897364	0.954382577	0.963799354	0.972100779	1.003793202
15:35:20.659	0.908411306	0.907125301	0.839609481	0.855751806	0.860768469	0.862336485	0.880922607	0.871806393	0.871334413	0.870576669	0.901030906	0.922740698	0.925595171	0.92802657	0.954582763	0.964032329	0.972296582	1.004032492
15:35:21.610	0.908031139	0.907398673	0.839543802	0.855750812	0.860723587	0.862299646	0.880859607	0.871708101	0.871199799	0.870549924	0.900886781	0.92257386	0.925404476	0.927866953	0.954412992	0.963825108	0.972094562	1.003853402
15:35:22.560	0.908771389	0.905743771	0.839559412	0.85581785	0.860755154	0.862288727	0.88084228	0.871710533	0.871145845	0.870528279	0.900878329	0.922602714	0.925402181	0.92785898	0.954411989	0.963831232	0.972047648	1.003843845
15:35:23.510	0.908534606	0.905363361	0.839564965	0.855824215	0.860774528	0.862379823	0.880863501	0.871712741	0.871201001	0.870470685	0.900881893	0.922634579	0.925384761	0.927742706	0.954364097	0.963795965	0.971928442	1.003804366
15:35:24.547	0.908834608	0.907717685	0.839641548	0.855851155	0.860845453	0.862431835	0.880926856	0.871826926	0.871265633	0.870789505	0.901058289	0.922716262	0.925649159	0.927978067	0.954586549	0.964013447	0.972150592	1.004073082
15:35:25.498	0.908357244	0.905395182	0.839701099	0.855929511	0.860909743	0.862477581	0.881046506	0.871837398	0.871386187	0.870740965	0.901130016	0.92280076	0.925733025	0.928003791	0.954669325	0.964137171	0.972234239	1.004193667
15:35:26.448	0.908733101	0.906592129	0.839544314	0.855851443	0.860785666	0.862378037	0.880837185	0.871665905	0.871146502	0.870458901	0.900784859	0.922447689	0.925334832	0.927589273	0.954215671	0.963578001	0.971565163	1.00356543
15:35:27.485	0.909068219	0.905937672	0.839706327	0.855870568	0.860831642	0.862454371	0.88085144	0.871675494	0.871114303	0.870511993	0.90079045	0.922452016	0.925313029	0.927675729	0.954178953	0.963530187	0.971334209	1.003494695
15:35:28.435	0.908962907	0.905003347	0.839708939	0.85591803	0.86083446	0.862431701	0.88088197	0.871697933	0.87116871	0.870456445	0.900708112	0.922398969	0.925225464	0.927541842	0.954025243	0.963292961	0.971121524	1.003219984
15:35:29.386	0.908718353	0.90597167	0.839792883	0.855975213	0.860897733	0.862476093	0.880899988	0.871717818	0.87114352	0.870474387	0.900795193	0.922475747	0.925341603	0.927599444	0.954096895	0.963357095	0.971181001	1.003267145
15:35:30.422	0.908241116	0.906493037	0.839836344	0.85606825	0.861013758	0.862601772	0.881120256	0.871960722	0.871446106	0.870757769	0.901107822	0.922803969	0.925706555	0.927870205	0.954435863	0.963708147	0.971375373	1.003655984
15:35:31.373	0.908986207	0.90743442	0.839935622	0.856144789	0.861136515	0.86276554	0.881317734	0.872130764	0.871628793	0.87100854	0.901420194	0.923202916	0.926020744	0.928255574	0.954750182	0.964063976	0.971717507	1.003999378
15:35:32.323	0.90883405	0.905404465	0.840012018	0.856202023	0.861215552	0.862874939	0.881393368	0.872242864	0.871760823	0.871099568	0.901571372	0.92331745	0.926143903	0.928426425	0.954907254	0.964123306	0.971932476	1.004089608
15:35:33.274	0.909424435	0.905666656	0.840100301	0.856278616	0.861304881	0.86297586	0.881538481	0.872373949	0.871918224	0.871180698	0.901696835	0.923462127	0.926240648	0.928570949	0.955025029	0.96421953	0.972048684	1.004107142
15:35:34.310	0.908738754	0.907073355	0.840122917	0.856309769	0.861393423	0.863005956	0.881617454	0.872447926	0.871936604	0.871180722	0.901732205	0.923417715	0.926229518	0.928592131	0.954889963	0.963964724	0.971790425	1.003787236
15:35:35.261	0.909144512	0.909651776	0.840102012	0.856423065	0.861406451	0.863034275	0.881721649	0.872518615	0.87203371	0.871340888	0.901771954	0.923438483	0.926258169	0.92873724	0.954912526	0.963908054	0.971791023	1.003698815
15:35:36.211	0.909441741	0.906635422	0.840277275	0.856547606	0.861649417	0.863190198	0.881992275	0.872796333	0.872335914	0.871678017	0.902103092	0.923841311	0.92673396	0.929223064	0.955488408	0.96446279	0.972459094	1.004336066
15:35:37.248	0.90884262	0.90763058	0.840380968	0.856617911	0.861712148	0.863301387	0.8820403	0.872897707	0.872361948	0.87179949	0.902190103	0.923948431	0.92682204	0.929329987	0.955563742	0.964545085	0.972537711	1.004408217
15:35:38.198	0.90974589	0.907851599	0.840507421	0.856698862	0.86185459	0.863466755	0.882305966	0.873155634	0.872663221	0.872209041	0.902656141	0.924386476	0.927273471	0.929771712	0.95612107	0.965135344	0.973113287	1.005044202
15:35:39.149	0.909958034	0.907080018	0.840512635	0.85674853	0.861831072	0.863470222	0.882158792	0.873020594	0.872507623	0.871962166	0.902391892	0.92404145	0.926965759	0.929504142	0.95567998	0.964577252	0.972395734	1.004422278
15:35:40.186	0.910020702	0.906948966	0.840510043	0.856801016	0.861838111	0.863473509	0.882177592	0.873016531	0.872486138	0.871938013	0.902347454	0.923984015	0.926900614	0.929341285	0.955563745	0.964427803	0.972276328	1.004260465
15:35:41.136	0.909190033	0.907608627	0.840488754	0.856783881	0.861832024	0.863453051	0.882129964	0.872955829	0.872424668	0.871880259	0.902243468	0.923861393	0.92672506	0.929293146	0.955390163	0.964281698	0.972010708	1.004097422
15:35:42.086	0.910115152	0.906437388	0.840588957	0.85681664	0.861827036	0.863510885	0.88219099	0.873011971	0.872449997	0.871921484	0.902304678	0.923928107	0.926852858	0.929351113	0.955542481	0.96440992	0.972300337	1.004294739
15:35:43.123	0.909253362	0.906636026	0.840619889	0.856791293	0.86183681	0.863446804	0.882143338	0.87297044	0.872451559	0.871899419	0.90229729	0.923898667	0.926745764	0.929259089	0.955482132	0.964358137	0.972372563	1.00421403
15:35:44.074	0.909004179	0.906848829	0.84063823	0.856830404	0.861912248	0.863556635	0.882225512	0.873026043	0.872476618	0.871857182	0.902363694	0.924062942	0.92685316	0.929355577	0.955683207	0.964623543	0.972520491	1.004482089
15:35:45.024	0.908414915	0.906892324	0.840658482	0.856804351	0.861829174	0.863492731	0.882093233	0.872862371	0.87225885	0.871759262	0.902125529	0.923706164	0.926643615	0.929026995	0.955357463	0.964279571	0.972183777	1.004146676
15:35:45.974	0.909289741	0.907035125	0.840585531	0.856834302	0.861837225	0.863488934	0.882100922	0.872832024	0.872195462	0.871688325	0.902050231	0.923690587	0.926563185	0.929034177	0.955289976	0.964259792	0.971961162	1.004109005
15:35:47.011	0.909118001	0.907105063	0.840581734	0.856902455	0.861866205	0.863518212	0.882121738	0.872862789	0.872261211	0.871752647	0.902167339	0.923828503	0.926665492	0.929103028	0.955482463	0.964449665	0.972061347	1.004367552
15:35:47.962	0.909492272	0.904804444	0.840615813	0.856884281	0.861884491	0.863575557	0.882105634	0.872802063	0.872199834	0.871686285	0.902066107	0.923668527	0.926528308	0.928950159	0.955321841	0.964326265	0.971725359	1.004180186
15:35:48.912	0.910165173	0.908292152	0.840688169	0.856875653	0.861850991	0.863509314	0.882008955	0.872740119	0.872101598	0.871550945	0.90189582	0.92353169	0.926421381	0.928801531	0.955127527	0.964072571	0.971389388	1.003949659
15:35:49.949	0.910272249	0.905635121	0.840653132	0.856902362	0.861837001	0.863487305	0.881981798	0.872704435	0.872072234	0.871464686	0.901813765	0.923406376	0.926261164	0.928708997	0.955004021	0.963891685	0.971140934	1.00378445
15:35:50.899	0.909922652	0.904554866	0.84068884	0.856903935	0.861858868	0.863487299	0.881968889	0.872687351	0.872037161	0.871477894	0.901763949	0.923417922	0.926308429	0.928701922	0.955011383	0.963974794	0.971139298	1.003835828
15:35:51.850	0.909011081	0.91014422	0.840696406	0.856937123	0.861886972	0.863562548	0.882034555	0.872777265	0.872146555	0.871552688	0.901953392	0.923629326	0.926527293	0.928904747	0.955251434	0.96426411	0.97140669	1.00415761
15:35:52.886	0.909785794	0.907028593	0.840654187	0.856940956	0.861860188	0.863370145	0.881818462	0.872575892	0.871876416	0.871322082	0.901562591	0.923192037	0.926099976	0.928459114	0.954805497	0.963772608	0.970861028	1.003661553
15:35:53.837	0.909533988	0.908940454	0.840603567	0.856865154	0.861732699	0.86333654	0.881717053	0.872370987	0.871692205	0.871058585	0.901270744	0.922852964	0.92568352	0.928165113	0.954392188	0.963336779	0.970487548	1.003198873
15:35:54.787	0.909281283	0.907427163	0.840634433	0.856832089	0.861725626	0.863343444	0.881681796	0.872337776	0.871660087	0.870992974	0.901267362	0.922876706	0.925754983	0.92814733	0.954505017	0.963539766	0.970700039	1.003487002
15:35:55.824	0.909477037	0.907088212	0.840678047	0.856822214	0.861731206	0.863358193	0.881651274	0.872326223	0.871624535	0.870964638	0.901262863	0.922911418	0.925843395	0.928229566	0.954618708	0.963799177	0.970869678	1.003775445
15:35:56.774	0.909788791	0.909367733	0.840547868	0.856746906	0.861559234	0.863186825	0.881414308	0.872008402	0.871280643	0.870616885	0.900815945	0.922390937	0.925285454	0.927749536	0.954073339	0.963201008	0.970393833	1.003188135
15:35:57.725	0.908222341	0.908089381	0.840572642	0.856732125	0.861548047	0.863149507	0.881346356	0.871993175	0.871256594	0.870601572	0.90083426	0.922517005	0.925348755	0.927766564	0.954260583	0.963572756	0.970764674	1.003600456
15:35:58.675	0.909609012	0.907293452	0.840522251	0.856598591	0.861406751	0.863046706	0.881107369	0.871674912	0.870979168	0.870200099	0.900417137	0.922012895	0.924906485	0.927345268	0.953871465	0.963236865	0.970449951	1.003291523
15:35:59.712	0.908889228	0.90806242	0.840424333	0.856575952	0.861287495	0.862901318	0.880954335	0.871533153	0.870797086	0.870067088	0.900261994	0.921904534	0.924794745	0.927284621	0.95385398	0.963396739	0.970686889	1.003529587
15:37:15.139	0.905712141	0.899605944	0.83993461	0.85548687	0.858881203	0.86051979	0.87583099	0.865294739	0.863963001	0.862260174	0.891600824	0.913015106	0.916207826	0.918687949	0.946069266	0.95828048	0.965254209	0.99924947
15:37:16.090	0.908896203	0.906394929	0.840058651	0.855642174	0.859191391	0.860784806	0.87597361	0.865517834	0.864216577	0.862478102	0.891887566	0.913437545	0.916490987	0.918845878	0.946395519	0.958495875	0.965803975	0.999548877
15:37:17.126	0.908504732	0.906895146	0.840306041	0.855819867	0.859420402	0.861003352	0.876271888	0.865821647	0.864474949	0.862865187	0.89231821	0.913757437	0.916861678	0.919318434	0.946792442	0.958872819	0.966176717	0.99989498
15:37:18.077	0.909459282	0.908413731	0.840397753	0.855956078	0.859587688	0.861180704	0.876486025	0.866057703	0.864790992	0.863006203	0.892677074	0.914155766	0.917276393	0.91967056	0.947206615	0.959263755	0.966652334	1.000305661
15:37:19.027	0.908443468	0.905919871	0.840582236	0.856132355	0.859794424	0.861369416	0.87673945	0.866383805	0.865202997	0.863488109	0.893175532	0.91468106	0.91779379	0.920148691	0.947759389	0.95978043	0.967171705	1.000813413
15:37:19.978	0.908615393	0.907644126	0.840653482	0.856265179	0.85994809	0.861608573	0.877017295	0.866623132	0.865418764	0.863678092	0.893463927	0.915037804	0.918068653	0.920459915	0.948068597	0.960035083	0.967482554	1.001034854
15:37:21.014	0.909754881	0.90668039	0.840681491	0.856345186	0.86004795	0.861577718	0.87705969	0.86673809	0.86551968	0.863720832	0.89351987	0.915039714	0.918130741	0.920491434	0.947968795	0.95981303	0.967190906	1.000728032
15:37:21.965	0.908946306	0.905421591	0.840768068	0.85636414	0.860019624	0.861646929	0.877078729	0.866724949	0.865443788	0.863705782	0.893468419	0.914938305	0.917932297	0.920308809	0.947668983	0.95931983	0.966732944	1.000181029
15:37:22.915	0.908573293	0.905936834	0.840930033	0.856561073	0.860324528	0.862011276	0.877506277	0.867180311	0.865940246	0.864246699	0.894029366	0.915638577	0.918683351	0.921020379	0.948380386	0.960045183	0.96744199	1.000826995
15:37:23.952	0.909356341	0.90748458	0.841021321	0.856672005	0.860538774	0.862079302	0.877754949	0.867445413	0.866258002	0.864590249	0.894297507	0.91598689	0.919034405	0.921461102	0.948666372	0.960242273	0.967733339	1.000992403
15:37:24.902	0.909065221	0.907854811	0.841162742	0.856774046	0.860643678	0.862223909	0.877943471	0.867651596	0.86635617	0.864780262	0.894461888	0.916116036	0.919175068	0.921575844	0.948722553	0.960156663	0.967528654	1.000842663
15:37:25.853	0.909840306	0.906228337	0.841239101	0.856871312	0.860721928	0.862304534	0.878079269	0.867744677	0.866617896	0.864922037	0.894605444	0.916165493	0.91923971	0.921712623	0.948664549	0.959895435	0.967213275	1.000499037
15:37:26.803	0.909039304	0.905679557	0.841436177	0.857116368	0.86102003	0.862625195	0.878524195	0.868254639	0.867213952	0.865529837	0.895339697	0.916832861	0.919933011	0.922363075	0.949443917	0.96058689	0.967866529	1.001219189
15:37:27.840	0.909812282	0.906911759	0.841547214	0.857255415	0.861237773	0.862797128	0.878783183	0.868542837	0.867492449	0.86588018	0.895695543	0.917235408	0.920276824	0.922758752	0.949772857	0.96083084	0.968115337	1.001432186
15:37:28.790	0.908940933	0.908505331	0.841576831	0.857324153	0.861303462	0.862908402	0.878924554	0.868671512	0.867633407	0.866014652	0.895843581	0.917313143	0.920352553	0.922697251	0.949756151	0.960679633	0.967883542	1.001172702
15:37:29.741	0.909766449	0.907738675	0.841799147	0.857559418	0.861546461	0.863106807	0.879302256	0.869067181	0.868047952	0.866543956	0.896294527	0.917877903	0.920929647	0.92322519	0.950257573	0.961071039	0.968345544	1.001544747
15:37:30.778	0.908967239	0.907214077	0.841829153	0.857670125	0.86169219	0.863305905	0.879555541	0.869363103	0.868392462	0.866981358	0.896624162	0.918230917	0.921282537	0.923614515	0.950532844	0.961249409	0.968448124	1.001627879
15:37:31.728	0.910135224	0.906143183	0.842081841	0.857892472	0.861977387	0.863594564	0.879970248	0.869803876	0.869001542	0.867587105	0.897376579	0.918849339	0.921931664	0.924258125	0.951232227	0.96189	0.96914369	1.002299893
15:37:32.678	0.909569556	0.90641386	0.842176992	0.857957733	0.862157564	0.863686135	0.880132374	0.869929789	0.869207835	0.867661409	0.897530686	0.918979703	0.921965138	0.924319703	0.951150316	0.961580353	0.968843985	1.001941793
15:37:33.715	0.910477087	0.906316945	0.84220682	0.858029542	0.862181009	0.863805306	0.880177135	0.870030909	0.869218297	0.867711429	0.897558604	0.91888225	0.921901469	0.924223912	0.950925659	0.961173582	0.968440451	1.001401375
15:37:34.666	0.910363647	0.909863426	0.842438931	0.858285864	0.862534219	0.864198134	0.880700584	0.870526354	0.869720987	0.868283028	0.898269002	0.919627623	0.92266686	0.92493796	0.951728804	0.961886987	0.969194039	1.002126004
15:37:35.616	0.910539342	0.907230059	0.842736643	0.858542312	0.862865726	0.864418477	0.881204785	0.871067303	0.870311638	0.868938736	0.898959671	0.920503664	0.923487403	0.925830704	0.952547453	0.962603631	0.969996339	1.002925418
15:37:36.566	0.909729547	0.908729673	0.842774218	0.858606842	0.86293925	0.864471121	0.881231494	0.871143669	0.870393051	0.868929332	0.898871614	0.920368806	0.923302212	0.92565548	0.952202893	0.962047605	0.969330227	1.002162996
15:37:37.603	0.910771022	0.9085779	0.842858956	0.858745211	0.863089848	0.864625273	0.881517313	0.87143616	0.870717208	0.86944507	0.899200865	0.920771018	0.923685167	0.925980477	0.952498633	0.962196142	0.969545685	1.002322696
15:37:38.554	0.910993068	0.907422719	0.84308738	0.858968078	0.86337405	0.864986443	0.881950752	0.871925453	0.871180557	0.86994443	0.899868347	0.921509142	0.924436894	0.926579736	0.953136972	0.962784469	0.970248514	1.002920758
15:37:39.504	0.911471175	0.909040753	0.843263104	0.859130017	0.863607426	0.865215293	0.88232713	0.872299322	0.871605573	0.870405059	0.900370365	0.921942569	0.92490608	0.927111453	0.953551526	0.963055109	0.970457839	1.003092525
15:37:40.541	0.911254162	0.90950801	0.843467094	0.859328593	0.863895674	0.865535619	0.882728483	0.872758122	0.872157683	0.870836189	0.900980942	0.922578875	0.925569233	0.927702336	0.954225445	0.963630837	0.970945097	1.003629642
15:37:41.491	0.911024084	0.909807069	0.843505411	0.859416299	0.864003834	0.865648298	0.882906099	0.872920706	0.872304565	0.870943757	0.901094058	0.922646929	0.925605867	0.927780597	0.954162975	0.963383214	0.970712674	1.003306107
15:37:42.442	0.911335812	0.908562821	0.843712962	0.859539296	0.864211104	0.865879932	0.883204069	0.873237131	0.872579957	0.871320299	0.901388743	0.923043908	0.926007243	0.928275483	0.954492932	0.963559139	0.970802347	1.003442705
15:37:43.478	0.91138787	0.909311718	0.843787347	0.859787089	0.864440948	0.866047079	0.883479353	0.873579154	0.872918273	0.87173806	0.901893646	0.92353059	0.926469231	0.928796654	0.954946132	0.963892291	0.971165343	1.003749028
15:37:44.429	0.911617197	0.908003942	0.843950132	0.859905726	0.864618574	0.866305673	0.883844372	0.873944482	0.873198827	0.872169223	0.9024071	0.923977117	0.926874268	0.929325064	0.955416015	0.964258799	0.97159548	1.004084043
15:37:45.379	0.911487864	0.907697575	0.84401977	0.860000747	0.864723215	0.866361051	0.8838952	0.874049781	0.873293323	0.872206474	0.902487978	0.924010854	0.926893099	0.929278489	0.955292281	0.963941072	0.971332504	1.003706108
15:37:46.416	0.911480756	0.908599458	0.844252337	0.860151367	0.864984066	0.866645876	0.884214502	0.874406146	0.87367325	0.872615077	0.90309693	0.924480042	0.927450837	0.929685977	0.955807839	0.964413451	0.97182146	1.004190391
15:37:47.366	0.911864877	0.909044617	0.844331268	0.860288012	0.865101725	0.866797207	0.884444747	0.874624108	0.873981725	0.872850326	0.903381421	0.924736114	0.927763976	0.930055721	0.956043776	0.964571772	0.972038414	1.004292908
15:37:48.317	0.912169229	0.910084604	0.844383008	0.86039595	0.865235209	0.866903694	0.884644498	0.874833839	0.874214815	0.873084088	0.903653815	0.925040978	0.928027216	0.930271348	0.956277199	0.964722836	0.972214618	1.004398286
15:37:49.267	0.912826394	0.909861434	0.84451308	0.860512442	0.865370006	0.867031481	0.884808042	0.875041948	0.87448778	0.873341103	0.903847885	0.925352024	0.928221844	0.930462557	0.956502518	0.964865903	0.972326135	1.004477155
15:37:50.304	0.911434891	0.91214382	0.844609199	0.860638309	0.865521254	0.867206923	0.885073129	0.875275947	0.874682485	0.873569945	0.904023107	0.925652586	0.928462629	0.930711839	0.956689514	0.964880176	0.972402009	1.004508673
15:37:51.254	0.912377911	0.90706142	0.844778978	0.860782729	0.865723717	0.86733647	0.885289731	0.875571784	0.875056965	0.87401355	0.904395256	0.926015054	0.928784096	0.931188271	0.956971687	0.965093792	0.97271612	1.004642997
15:37:52.205	0.912303031	0.910231253	0.844900766	0.860874922	0.865892618	0.867513472	0.885477394	0.875762958	0.875195141	0.874091234	0.904569159	0.926122694	0.928851906	0.931245173	0.956977568	0.964959254	0.972661824	1.004458994
15:37:53.242	0.912610881	0.910809017	0.845020229	0.861087093	0.866181712	0.867797344	0.885879871	0.876213969	0.875677465	0.874653631	0.905259137	0.926852613	0.929603481	0.932026669	0.957690327	0.965664596	0.973376321	1.00515112
15:37:54.192	0.912654865	0.910269754	0.845161135	0.861264373	0.866338009	0.867972379	0.886131	0.87648566	0.875905192	0.874970656	0.905587243	0.927102589	0.929804473	0.93216964	0.957865081	0.965622146	0.973393542	1.005049419
15:37:55.142	0.913496423	0.907974155	0.84532005	0.86139405	0.866573273	0.868201142	0.886447961	0.876826828	0.876287638	0.875373134	0.90594401	0.927507277	0.930319376	0.932577816	0.958258971	0.965885041	0.97365455	1.00531235
15:37:56.179	0.911730404	0.911120477	0.845404485	0.861470771	0.866689663	0.868325304	0.88656669	0.876943008	0.876404629	0.875517976	0.906014455	0.927516622	0.930288634	0.932582318	0.958099758	0.965553535	0.973370294	1.004885886
15:37:57.130	0.912845397	0.911213783	0.845580771	0.861633143	0.866918544	0.868548456	0.886929572	0.877381094	0.876816417	0.875995893	0.906500531	0.928140198	0.930940494	0.933196746	0.958707955	0.966110326	0.973782061	1.005423722
15:37:58.080	0.913333239	0.910870423	0.845711274	0.861751133	0.867086466	0.868699544	0.887119589	0.877562891	0.877052338	0.876104956	0.906659871	0.928311227	0.931036663	0.933320793	0.958693616	0.965892959	0.973492318	1.005159511
15:37:59.117	0.913337206	0.91093787	0.84589015	0.861888397	0.867285438	0.868924787	0.88744009	0.877888646	0.877390168	0.876587679	0.907099409	0.928737095	0.93142834	0.93383282	0.959105117	0.966250417	0.973911072	1.00546558
15:38:00.067	0.91347919	0.909870465	0.845945739	0.861953538	0.867371768	0.869001459	0.887475571	0.878008136	0.877551856	0.876645538	0.907261222	0.928809263	0.931503932	0.933952445	0.959060224	0.966068158	0.973682647	1.005214855
15:39:15.581	0.914030932	0.905310653	0.85135034	0.867641191	0.874667265	0.87620431	0.896943457	0.887985216	0.888479497	0.888018762	0.919210944	0.940748767	0.943332774	0.945559667	0.96860164	0.9720263	0.98199779	1.009625143
15:39:16.531	0.917514631	0.91470259	0.851565919	0.867745695	0.874782226	0.876413825	0.89722526	0.888312	0.888629905	0.888408093	0.919640997	0.941275885	0.943653889	0.945940829	0.969223502	0.972445268	0.982228917	1.010086943
15:39:17.482	0.918220584	0.913298666	0.851694574	0.867945217	0.874947083	0.876637944	0.897429202	0.888499924	0.888739629	0.888580367	0.919775676	0.941468518	0.943805058	0.946106171	0.969327276	0.972450109	0.982256186	1.010080337
15:39:18.518	0.917654806	0.913739591	0.851746049	0.867976918	0.875028708	0.876656726	0.897498384	0.888608385	0.888761138	0.88871147	0.919870056	0.941503656	0.943850846	0.946112931	0.969324781	0.972375677	0.98225409	1.009995875
15:39:19.469	0.918193134	0.916584531	0.851914173	0.868175981	0.875269055	0.876895434	0.89780529	0.888916544	0.889222541	0.889073773	0.920436006	0.942002674	0.944355716	0.946639321	0.969871369	0.972906137	0.982870615	1.010513337
15:39:20.419	0.918268437	0.91668527	0.852000848	0.868251007	0.875297625	0.876986046	0.897886638	0.889012921	0.889254099	0.889133753	0.920507444	0.94206387	0.944393696	0.946617158	0.969862203	0.972840905	0.983024984	1.010385645
15:39:21.370	0.917985385	0.917066822	0.852065392	0.868267366	0.875359736	0.876995868	0.897921264	0.889029422	0.889312209	0.889190582	0.920503617	0.94196341	0.944308572	0.946563304	0.969653594	0.972544074	0.982670826	1.010025627
15:39:22.406	0.917731496	0.914877605	0.852238177	0.868414098	0.875558887	0.877174937	0.89817827	0.889297794	0.889651453	0.889421556	0.920939781	0.942366852	0.94470993	0.946967405	0.9700894	0.972922128	0.982936698	1.010398937
15:39:23.357	0.917623996	0.9179102	0.852279715	0.868489642	0.875669905	0.877315951	0.898305552	0.889435116	0.889818938	0.889554842	0.920982836	0.94236933	0.944744133	0.946943543	0.970050102	0.972799327	0.982813435	1.010249093
15:39:24.307	0.917894341	0.915815823	0.852370838	0.868610816	0.875816669	0.877433254	0.898471786	0.889666741	0.890103464	0.889858105	0.921349792	0.94271878	0.945127032	0.947275497	0.970417513	0.973093572	0.983182351	1.010501554
15:39:25.344	0.918539236	0.915606123	0.852523683	0.868739178	0.875983444	0.877680967	0.898720794	0.889919925	0.890442574	0.890049622	0.921597853	0.943031094	0.94540675	0.947590861	0.970705315	0.973388623	0.983528176	1.01076103
15:39:26.294	0.918748375	0.917448088	0.852553283	0.868806992	0.876094454	0.877720505	0.898909682	0.890064867	0.890626373	0.890159985	0.921691712	0.943175617	0.945519516	0.947708139	0.970804605	0.9734075	0.983624533	1.01073997
15:39:27.245	0.918054803	0.914718258	0.852678837	0.868866191	0.876136431	0.877862971	0.898999565	0.890134899	0.890762802	0.890271682	0.921765068	0.943210138	0.945601041	0.947814042	0.97080496	0.973340258	0.98370134	1.010638661
15:39:28.282	0.918295499	0.915866001	0.852799392	0.869016606	0.876381582	0.877951141	0.899338794	0.890497522	0.891217181	0.890721126	0.92225124	0.943820391	0.946112473	0.948355627	0.97140608	0.973937265	0.984447345	1.011282489
15:39:29.232	0.919068517	0.916942691	0.852823928	0.869132927	0.876373832	0.878033926	0.89930569	0.890487577	0.891217367	0.890722174	0.922268003	0.9438043	0.946135987	0.948377353	0.971338762	0.973833609	0.984365066	1.011189951
15:39:30.182	0.91819859	0.917651753	0.852858044	0.869039463	0.876361809	0.878121985	0.89925585	0.890362791	0.891083337	0.890505166	0.921974248	0.943494559	0.945770796	0.947975518	0.97088947	0.97331473	0.983821694	1.010550763
15:39:31.133	0.918359466	0.916277291	0.852801801	0.86920683	0.876436544	0.878095715	0.899386706	0.890520559	0.891267569	0.890719569	0.922199085	0.943744196	0.946007451	0.948315689	0.97113794	0.973543665	0.984135953	1.010795794
15:39:32.170	0.918156801	0.917108146	0.852920194	0.869238422	0.876495711	0.87820642	0.899425523	0.89059631	0.891347462	0.890733333	0.922322994	0.94376114	0.946039629	0.948361441	0.971148432	0.973505032	0.984207331	1.010767688
15:39:33.120	0.918567731	0.91598866	0.853014835	0.869342399	0.876576242	0.878266152	0.899562838	0.890715075	0.891402636	0.890879592	0.922517994	0.943931439	0.946212694	0.948481158	0.971277717	0.973572434	0.984417273	1.010857705
15:39:34.070	0.91873917	0.916965959	0.852980293	0.869312206	0.876591105	0.878279168	0.899500948	0.890644408	0.8913063	0.890730812	0.922344597	0.943704806	0.946021811	0.948375331	0.970999362	0.973253024	0.984018211	1.010497591
15:39:35.107	0.918452054	0.918641693	0.853046879	0.869395883	0.876692935	0.878345941	0.89961876	0.890724157	0.891430226	0.890832901	0.922396022	0.943768563	0.946062235	0.948498293	0.971076875	0.973257399	0.984068491	1.010507698
15:39:36.058	0.918796718	0.917724182	0.853189123	0.869471942	0.876790842	0.878493749	0.899717536	0.890862606	0.891401249	0.891006355	0.92257522	0.943954322	0.946253206	0.948614	0.971243426	0.97337592	0.984288773	1.010649887
15:39:37.008	0.918874177	0.91598262	0.853100768	0.86949601	0.876772025	0.878447246	0.899724391	0.890846482	0.89137228	0.89095695	0.922570037	0.943888185	0.946191106	0.948547851	0.971114082	0.973224838	0.984034423	1.010431782
15:39:37.958	0.919131606	0.916713869	0.853170422	0.869539189	0.87688755	0.878542723	0.899858566	0.891037157	0.891451079	0.891091388	0.922718436	0.944016838	0.946434767	0.948795501	0.971322138	0.973416482	0.984130311	1.010668334
15:39:38.995	0.918677922	0.917626242	0.853343161	0.869684352	0.877003125	0.878699765	0.900087711	0.891253825	0.891745255	0.891442101	0.92298599	0.944391696	0.946818403	0.949127494	0.971728752	0.973837436	0.984543671	1.01105644
15:39:39.946	0.91879817	0.916373603	0.853373476	0.86969582	0.877051333	0.878739211	0.900080404	0.891239397	0.89171317	0.891351638	0.922920656	0.944246504	0.946699433	0.949075658	0.971569513	0.973594843	0.984257906	1.010774711
15:39:40.896	0.918536746	0.917021849	0.853441879	0.869751162	0.877169934	0.878800333	0.900239469	0.891377167	0.891873563	0.891535485	0.92309062	0.944457597	0.946895131	0.949234098	0.971748854	0.97380398	0.984475607	1.010966324
15:39:41.933	0.918283381	0.91777026	0.853541118	0.869848156	0.877238684	0.878884779	0.900313664	0.891465942	0.892023614	0.891823249	0.92319974	0.944651493	0.947053182	0.949375668	0.971943206	0.973972869	0.984672541	1.01116383
15:39:42.883	0.919037509	0.915739805	0.85358556	0.869914352	0.877277831	0.878953243	0.900430436	0.891602617	0.892212675	0.891824295	0.923338197	0.944852325	0.947212956	0.949495848	0.972132031	0.974227284	0.984833755	1.011403761
15:39:43.834	0.91912861	0.915798307	0.85349352	0.869860764	0.87726247	0.878892411	0.900368427	0.891501243	0.892062597	0.891658512	0.923243526	0.944728407	0.947089201	0.949289279	0.97200511	0.974133337	0.984635569	1.011312884
15:39:44.870	0.918823952	0.917014129	0.853522592	0.869835899	0.877195312	0.878854034	0.900266297	0.8913706	0.891967187	0.891543462	0.923062786	0.944496894	0.946901939	0.949161515	0.971812792	0.973917861	0.984394597	1.011075125
15:39:45.821	0.918477498	0.914031985	0.853411426	0.869686235	0.87699822	0.878735212	0.899994523	0.891029224	0.891561269	0.891092762	0.922552939	0.943915143	0.946351341	0.948578745	0.971197872	0.97324334	0.983720658	1.010419757
15:39:46.771	0.919274853	0.917743783	0.853423668	0.869695954	0.877001882	0.878683014	0.899923593	0.89100829	0.891538128	0.891117691	0.922548602	0.943931304	0.946386736	0.94863776	0.97125232	0.973425013	0.98389715	1.010616483
15:39:47.808	0.918381307	0.915586439	0.853320404	0.869685869	0.876952595	0.878702223	0.89990488	0.890987207	0.891508165	0.89111396	0.92254145	0.944018146	0.946427462	0.948618011	0.971428093	0.97367754	0.984157886	1.010949882
15:39:48.758	0.918364023	0.916416345	0.853241834	0.869589922	0.876789201	0.878470313	0.899653432	0.890679903	0.891153438	0.890803857	0.922207522	0.943556552	0.946013321	0.948258569	0.970989384	0.973336031	0.983775676	1.010596994
15:39:49.709	0.918748618	0.917255063	0.853163497	0.86945901	0.876652991	0.878311993	0.899356801	0.890351218	0.890825367	0.890414815	0.921800621	0.943084679	0.945555011	0.947890978	0.970557178	0.972929617	0.983330908	1.010200284
15:39:50.746	0.918699024	0.9156117	0.853177214	0.869427949	0.876562312	0.878295279	0.899282619	0.890277201	0.890826116	0.890312255	0.921708705	0.943057482	0.945530758	0.947880628	0.970618814	0.973098619	0.983436745	1.010403876
15:39:51.696	0.919132687	0.915129117	0.853040043	0.869303182	0.876429728	0.87808497	0.898968572	0.889939413	0.890378214	0.889830903	0.921284791	0.942547019	0.945037149	0.94734161	0.970088221	0.972576798	0.98289587	1.00990873
15:39:52.646	0.919078894	0.915465936	0.852961547	0.869249255	0.876306357	0.877992124	0.898829482	0.889757309	0.890214975	0.889556114	0.921113376	0.942310822	0.944824911	0.947181814	0.969968101	0.972538879	0.982992472	1.009949351
15:39:53.597	0.919232644	0.916521761	0.852985643	0.869250715	0.876275978	0.878003107	0.898698702	0.889699611	0.890120709	0.889629608	0.921036065	0.942319787	0.944854462	0.947150308	0.97004607	0.972746522	0.983207856	1.010164537
15:39:54.634	0.918331007	0.916904084	0.85285771	0.869138324	0.876125595	0.877844043	0.898531988	0.889413566	0.889817038	0.889326724	0.920717118	0.941966861	0.94446533	0.946754876	0.969685856	0.97247878	0.982853537	1.00989978
15:39:55.584	0.917740891	0.917526187	0.852915958	0.869106817	0.876078007	0.877769374	0.898406393	0.889275785	0.889686212	0.889106124	0.920538511	0.941814286	0.944325604	0.946570632	0.96955501	0.972355716	0.982753588	1.009807894
15:39:56.534	0.918366154	0.916352005	0.852842168	0.869016178	0.875976099	0.877637275	0.898239375	0.889110549	0.889477602	0.888894703	0.920268556	0.941540443	0.94403785	0.946316952	0.969306536	0.972122577	0.982659554	1.009606655
15:39:57.485	0.918562413	0.915349939	0.852807647	0.869021737	0.875920747	0.877647695	0.898111226	0.888982454	0.889315505	0.888700466	0.920109475	0.941351979	0.943795511	0.946130865	0.969077013	0.971949299	0.982429288	1.009418444
15:39:58.522	0.917697505	0.914587516	0.852733264	0.868903973	0.875850248	0.877528738	0.897963015	0.88880162	0.889191068	0.888462869	0.919847366	0.941096711	0.943515901	0.945909279	0.968805338	0.971670281	0.982262264	1.009137979
15:39:59.472	0.918543427	0.914541138	0.852723139	0.868956904	0.875799717	0.877493046	0.89794407	0.888785373	0.889184364	0.888504773	0.919821465	0.94109708	0.943588345	0.945878529	0.968906334	0.971833656	0.982481431	1.009353621
15:40:00.422	0.917532483	0.915165683	0.852673783	0.869006254	0.875798691	0.877496701	0.897851545	0.888711439	0.889072056	0.8884226	0.919805533	0.941002538	0.943516074	0.945868505	0.968839717	0.971817898	0.982388915	1.009383302
15:41:15.850	0.924883656	0.916640089	0.859297251	0.875782456	0.884321083	0.885907117	0.908647093	0.900135754	0.900855503	0.901073491	0.932362817	0.953573113	0.955390475	0.957550211	0.978560827	0.977459806	0.987770404	1.013363066
15:41:16.800	0.92396584	0.921735649	0.859533141	0.875972759	0.884595467	0.886278192	0.90920402	0.900538196	0.901505654	0.901297559	0.932827719	0.954049431	0.956013145	0.95813826	0.979112824	0.9780325	0.988520464	1.014085669
15:41:17.750	0.923769012	0.921119324	0.859776149	0.87618626	0.884795797	0.886500242	0.909416981	0.900788778	0.901727961	0.90153592	0.933070795	0.954265484	0.956193053	0.95830929	0.979148671	0.977887873	0.988522777	1.013918281
15:41:18.787	0.923247599	0.923967785	0.859856198	0.876338707	0.884949885	0.886651858	0.909639793	0.901023983	0.90193501	0.901762704	0.933407916	0.954509977	0.95653034	0.958615452	0.979449889	0.978174113	0.988993909	1.014200632
15:41:19.738	0.924400931	0.922599169	0.860015644	0.876405935	0.885064389	0.886797727	0.90976741	0.901177732	0.902060894	0.901931481	0.933525731	0.95462184	0.956717594	0.958816165	0.979576406	0.978299933	0.989014846	1.014301584
15:41:20.688	0.924319053	0.923364641	0.860003888	0.87648944	0.885129546	0.886790723	0.909842951	0.901241288	0.902081075	0.902038322	0.933572416	0.954602815	0.956697716	0.958837856	0.979531579	0.978192587	0.988953416	1.014185499
15:41:21.725	0.924576222	0.922405729	0.860096907	0.876577937	0.885269104	0.886961935	0.910020006	0.901415738	0.902116185	0.902131015	0.93374461	0.954780103	0.956855269	0.959043829	0.979697185	0.978338648	0.989104818	1.014312241
15:41:22.675	0.924363669	0.920873126	0.860171318	0.876625857	0.885331784	0.887027891	0.910121979	0.901511568	0.902184217	0.902256563	0.933880548	0.954835786	0.956898832	0.959198925	0.979708941	0.978348257	0.989029956	1.014289753
15:41:23.626	0.924094394	0.921249013	0.860272296	0.876708022	0.885415616	0.887142985	0.910236547	0.901619142	0.902319113	0.902346387	0.934019373	0.955005965	0.95708701	0.95926949	0.979941153	0.978553839	0.989257139	1.014488494
15:41:24.662	0.923441591	0.921194843	0.860188986	0.876650772	0.885363756	0.887132791	0.910108601	0.901487272	0.902251468	0.902149262	0.933771206	0.954755548	0.956771033	0.959063445	0.979602301	0.978234306	0.989011729	1.014122141
15:41:25.613	0.924131247	0.921809358	0.860219516	0.876699029	0.885369952	0.887048396	0.91006507	0.901387932	0.902114068	0.902039126	0.933659612	0.954588428	0.95662814	0.958841409	0.979413039	0.978040489	0.988930076	1.013950389
15:41:26.563	0.924315909	0.922493341	0.860239204	0.876672261	0.885357071	0.887043675	0.910032986	0.901335086	0.902065053	0.901983888	0.933574135	0.954485542	0.956552615	0.958780001	0.97935279	0.97796012	0.988796308	1.013870373
15:41:27.600	0.923944518	0.92206135	0.86028434	0.876758636	0.885419782	0.887124704	0.910054704	0.901393198	0.902142004	0.902075581	0.933679357	0.95461116	0.956629179	0.958944259	0.979512585	0.978174512	0.989023285	1.014103927
15:41:28.550	0.924159676	0.922779725	0.86033547	0.876779989	0.885397362	0.887110337	0.910092353	0.901410989	0.902231906	0.902060278	0.933690669	0.954705505	0.956723577	0.958938101	0.979634824	0.978354411	0.989145792	1.014295136
15:41:29.501	0.924083626	0.921554965	0.860293469	0.876742937	0.885406188	0.887069656	0.909955426	0.901271903	0.90204953	0.901928833	0.933519423	0.95444264	0.95646021	0.958682062	0.979339344	0.97800636	0.988909566	1.013973384
15:41:30.451	0.923787881	0.921502596	0.860265778	0.876793879	0.885411641	0.887145983	0.909982195	0.901315842	0.902060489	0.901889732	0.933478673	0.954500376	0.956490436	0.958792314	0.979398779	0.978071494	0.988874653	1.014031002
15:41:31.488	0.923465747	0.921923905	0.860435175	0.876831897	0.885450199	0.887180905	0.910025485	0.901356235	0.90207643	0.901977376	0.93349614	0.954605414	0.95660697	0.958858973	0.979551757	0.978253532	0.989008777	1.014183064
15:41:32.438	0.922541421	0.921445169	0.860371535	0.8767997	0.885441233	0.887076433	0.909988345	0.901335116	0.902106646	0.90195489	0.933381956	0.954467478	0.956436932	0.958789393	0.979344991	0.978023543	0.9887591	1.013947459
15:41:33.389	0.924687005	0.920613784	0.860415272	0.876918461	0.885511974	0.887224835	0.910111331	0.9014622	0.902256345	0.902019412	0.933479466	0.954596196	0.956594398	0.958884818	0.979444323	0.97805353	0.988766378	1.013979169
15:41:34.426	0.924583374	0.920875395	0.860416302	0.87697088	0.885573951	0.887334754	0.910153079	0.901520869	0.902233475	0.902016537	0.933447389	0.954546663	0.956547746	0.958767111	0.979302251	0.977837741	0.988489074	1.01371005
15:41:35.376	0.924924683	0.922696465	0.860713618	0.87715264	0.885867382	0.887618852	0.910573429	0.901934639	0.902774658	0.902494545	0.934097805	0.955169044	0.957123356	0.959283451	0.979954742	0.978509893	0.989298786	1.014340081
15:41:36.326	0.924329435	0.920123294	0.860815388	0.877355547	0.886076696	0.887758619	0.910833842	0.902255957	0.903149597	0.902885579	0.934567153	0.955571817	0.957526015	0.959755387	0.980416166	0.978875694	0.989822907	1.014726954
15:41:37.363	0.924451744	0.922595968	0.860907914	0.877434378	0.886233637	0.887984265	0.91112937	0.902493452	0.903338519	0.903155797	0.934891519	0.955859963	0.957826865	0.959970039	0.980669956	0.979028921	0.990066876	1.014885559
15:41:38.314	0.924778592	0.92292058	0.861089421	0.87761831	0.886362039	0.888132685	0.911263493	0.902698183	0.903663362	0.903299842	0.93512456	0.956077535	0.958045592	0.960333538	0.980839388	0.979174058	0.990246637	1.014994311
15:41:39.264	0.92432597	0.921338508	0.861196075	0.877720107	0.886508921	0.888271607	0.911525307	0.902947811	0.903859936	0.903647048	0.935433883	0.956345632	0.958317944	0.96051274	0.981089362	0.979355703	0.990502798	1.015162128
15:41:40.214	0.924948704	0.923647299	0.861321562	0.877954891	0.886813094	0.888576153	0.911916271	0.903369949	0.904227267	0.904108065	0.936007883	0.957049207	0.9589746	0.96112561	0.98174007	0.980014766	0.991210921	1.015812978
15:41:41.251	0.924332203	0.923722079	0.861437588	0.877992539	0.886859661	0.888604684	0.911984788	0.903423505	0.904220497	0.904053358	0.935891216	0.956901921	0.958826578	0.960997484	0.981470698	0.979606892	0.990813982	1.015362668
15:41:42.202	0.925006957	0.924031912	0.861605847	0.878185468	0.887177957	0.888891937	0.912304096	0.903839979	0.904631166	0.904573068	0.936434109	0.957564156	0.959496158	0.961661009	0.982147951	0.980267166	0.991580528	1.016072174
15:41:43.152	0.925455671	0.921770521	0.861611187	0.87821368	0.887193306	0.888877541	0.912391406	0.903838273	0.90456356	0.904577631	0.936334973	0.95740188	0.959335059	0.961385588	0.981837643	0.979829583	0.991107893	1.015524451
15:41:44.189	0.925058982	0.920878708	0.8617514	0.878291284	0.887263066	0.889043317	0.912453505	0.903946882	0.904642926	0.904678356	0.936353443	0.957443501	0.959318559	0.961514903	0.981747499	0.979613552	0.990968844	1.015262089
15:41:45.139	0.925111464	0.92308571	0.861789932	0.87836342	0.887350159	0.889024156	0.912531604	0.904051773	0.904828571	0.904719856	0.936432573	0.957438624	0.959333922	0.961372458	0.981662474	0.979401868	0.990659692	1.014993685
15:41:46.090	0.925968451	0.922928733	0.861967375	0.878467431	0.887554478	0.889270864	0.912805016	0.904345259	0.905144363	0.905105675	0.936823613	0.957869642	0.959733663	0.961836896	0.982068239	0.979873246	0.991069349	1.015444833
15:41:47.126	0.925672319	0.921968821	0.86204359	0.878659187	0.887745873	0.889463261	0.913084975	0.90463997	0.905444427	0.905413166	0.937239962	0.958294958	0.960109602	0.96223444	0.982481717	0.980225954	0.991395959	1.015806114
15:41:48.077	0.92528982	0.922323362	0.862093481	0.878741479	0.887823156	0.889576267	0.913155009	0.904700906	0.905511359	0.905517003	0.937318717	0.95833312	0.960065648	0.96224826	0.982433978	0.980143107	0.991352328	1.015668838
15:41:49.027	0.925586876	0.92330049	0.862250512	0.87887311	0.887961803	0.889660045	0.913318762	0.904911694	0.905801478	0.905753218	0.937581872	0.95866422	0.960373648	0.962535606	0.982771881	0.980421064	0.991644689	1.015954544
15:41:49.978	0.925916825	0.924279413	0.862188697	0.878851602	0.887914388	0.88972367	0.913298999	0.904866174	0.905801606	0.905641551	0.937496969	0.958547474	0.960290752	0.962479152	0.982644655	0.980248883	0.991632687	1.015768397
15:41:51.014	0.925872567	0.923021096	0.862250481	0.878899334	0.888047051	0.889764038	0.91345649	0.904964088	0.905928015	0.905838214	0.937631181	0.958656337	0.960440045	0.962565265	0.982780338	0.980365257	0.991730625	1.015915435
15:41:51.965	0.92622642	0.924503561	0.862382867	0.879115059	0.88821725	0.889974738	0.913734407	0.905312915	0.906262686	0.90623623	0.938093	0.959102011	0.961002977	0.963085443	0.983398368	0.981017034	0.992573503	1.016585446
15:41:52.915	0.926018704	0.923581496	0.862439796	0.879100243	0.888302166	0.890003508	0.913771502	0.905346651	0.90640439	0.906287709	0.938140345	0.959142554	0.961074543	0.963110259	0.983464972	0.981093619	0.992721003	1.016654366
15:41:53.952	0.926326743	0.92472555	0.862444102	0.87919656	0.888347575	0.890067768	0.913796563	0.905394699	0.906407021	0.906325552	0.938111082	0.959148279	0.961061773	0.963068003	0.983406551	0.981013246	0.992736638	1.016559261
15:41:54.902	0.925969125	0.923438679	0.86252445	0.879189511	0.888388819	0.890106421	0.91386644	0.90543251	0.906411662	0.906399863	0.938086108	0.959155869	0.961007131	0.963129842	0.983367152	0.980921774	0.992695859	1.016437498
15:41:55.853	0.926585112	0.924284504	0.862687743	0.879257873	0.888591589	0.890233352	0.914029569	0.905676921	0.906661393	0.90668568	0.938339725	0.959440746	0.961340402	0.963279891	0.983670157	0.981225676	0.993058765	1.016721812
15:41:56.890	0.926404794	0.92376031	0.862745852	0.879333908	0.888620266	0.890258834	0.914134638	0.905705027	0.906704757	0.906821653	0.938324928	0.959411719	0.961210176	0.963214335	0.983517226	0.980948691	0.992756897	1.01642771
15:41:57.840	0.926170204	0.922411431	0.862750643	0.879421696	0.888723423	0.890455285	0.914227476	0.905818385	0.906797663	0.906981016	0.938452198	0.959474776	0.961321386	0.963276583	0.983535108	0.980835693	0.992787496	1.016286282
15:41:58.790	0.926450712	0.922520303	0.862906763	0.879592035	0.888867837	0.890594481	0.914441167	0.906048312	0.906969218	0.907309202	0.93868427	0.959692981	0.961570523	0.96355784	0.98369353	0.980971082	0.992957153	1.01632939
15:41:59.741	0.925215281	0.923173846	0.862923374	0.879618853	0.888893969	0.890555449	0.914405295	0.906039541	0.906922038	0.907197744	0.938596973	0.959553479	0.96137736	0.963399916	0.983395866	0.980542303	0.992483269	1.015874467
15:43:15.514	0.93029983	0.918925517	0.86720015	0.883836128	0.893931001	0.895633064	0.920135572	0.911823335	0.912719511	0.913281949	0.944554477	0.965189776	0.967066246	0.968961678	0.988266509	0.98430706	0.998041871	1.018839022
15:43:16.464	0.92941064	0.928035925	0.867202958	0.88371184	0.89379918	0.895515781	0.919942749	0.91155568	0.912397293	0.912600351	0.944111019	0.964815231	0.966491374	0.968554783	0.987636212	0.983501302	0.997360224	1.018190627
15:43:17.501	0.929255583	0.92889982	0.867389856	0.88386373	0.893920787	0.895669274	0.920136787	0.911703904	0.91251391	0.912704408	0.944299358	0.965080875	0.966717977	0.968757129	0.987877388	0.983742248	0.997851816	1.018466319
15:43:18.451	0.928893803	0.928261461	0.867393607	0.883964121	0.893929366	0.895768355	0.920161984	0.911769518	0.912584675	0.912851976	0.944314806	0.965060315	0.966698178	0.968786559	0.987833655	0.983695381	0.997950043	1.018407433
15:43:19.402	0.929997898	0.929635495	0.86741469	0.88390702	0.893954182	0.895703182	0.920105994	0.911737142	0.912475173	0.912707366	0.944236269	0.964958791	0.966553038	0.968639552	0.987679201	0.98346129	0.997739098	1.018191521
15:43:20.352	0.930092216	0.927225369	0.867513533	0.883965715	0.894008482	0.895764373	0.920136086	0.911787908	0.912509602	0.912776834	0.944251715	0.964990019	0.966550679	0.968654504	0.987626323	0.983377117	0.99758469	1.018076579
15:43:21.389	0.929674031	0.928894734	0.867569705	0.884103896	0.894107992	0.895815067	0.920251242	0.911886944	0.912597319	0.912955988	0.944323847	0.965123057	0.966639598	0.968760709	0.987680086	0.983374306	0.997519208	1.018047538
15:43:22.339	0.93030721	0.928124137	0.867656896	0.884247917	0.894295407	0.896016416	0.920567941	0.912220688	0.913055885	0.913283577	0.944711499	0.96555616	0.967147411	0.969104054	0.988225509	0.983915759	0.998063877	1.018626871
15:43:23.290	0.930171598	0.926835072	0.867801765	0.88437037	0.894462192	0.89621676	0.920793334	0.912440397	0.913307197	0.913547014	0.944973968	0.965895817	0.967482425	0.96937279	0.988505113	0.984133723	0.998353	1.018865802
15:43:24.326	0.930114796	0.930011472	0.867947915	0.884423331	0.894555011	0.896276624	0.920893481	0.912520866	0.91330969	0.913700354	0.945040594	0.965938332	0.967488897	0.969441674	0.988481292	0.984107104	0.998312982	1.018795122
15:43:25.277	0.930148767	0.928386096	0.868087774	0.884583286	0.894719843	0.896495671	0.921159625	0.91276729	0.913623366	0.913878081	0.945424594	0.966346766	0.967883489	0.969846211	0.988963867	0.98461008	0.998686959	1.0193386
15:43:26.227	0.930231	0.928766538	0.867919422	0.884507607	0.894621817	0.896344571	0.920924096	0.912563121	0.913442243	0.913587747	0.945006683	0.965896401	0.967400755	0.969327101	0.988338429	0.983922104	0.997931016	1.018584834
15:43:27.264	0.93034348	0.927240571	0.868026938	0.884534998	0.894665885	0.896424966	0.92097346	0.912630316	0.913495525	0.913539464	0.94510207	0.96600576	0.967518613	0.969444615	0.988495848	0.98407916	0.998086775	1.018774502
15:43:28.214	0.930383854	0.926663853	0.868070645	0.884607234	0.894720131	0.896475578	0.921041586	0.91268922	0.913548938	0.913604067	0.945197429	0.966116279	0.96760949	0.969517655	0.988647066	0.984279353	0.998222891	1.018968858
15:43:29.165	0.930750142	0.927524499	0.868089784	0.884670765	0.894779621	0.896483245	0.921061879	0.912724208	0.913632701	0.913716607	0.94524101	0.966076364	0.967622699	0.96956873	0.988651465	0.984268846	0.998256151	1.018963132
15:43:30.115	0.930054915	0.929206547	0.868100857	0.884610587	0.894701169	0.896473973	0.920959563	0.912610476	0.91348516	0.913579184	0.94503694	0.96591288	0.967419823	0.969312179	0.988426795	0.984031529	0.997976064	1.018713316
15:43:31.152	0.929332823	0.926285637	0.868038337	0.88465111	0.894758035	0.896524246	0.921076717	0.912658949	0.913550451	0.913713312	0.945111813	0.965934208	0.967514934	0.969444799	0.988530403	0.984163916	0.998139095	1.018833174
15:43:32.102	0.929587586	0.928020811	0.868196148	0.884753035	0.894903081	0.896563492	0.921252697	0.912876206	0.913761679	0.913858571	0.945399999	0.966147985	0.967739258	0.969708259	0.988800927	0.984425865	0.998458934	1.019118354
15:43:33.053	0.930201514	0.927227154	0.868263034	0.884840465	0.894921842	0.896694234	0.921238966	0.912871589	0.913782393	0.913839687	0.945390859	0.966110395	0.967690713	0.969625921	0.988670559	0.984268558	0.998102921	1.018913333
15:43:34.090	0.930691958	0.927614845	0.868338388	0.884870282	0.895012571	0.896793227	0.921451908	0.913066677	0.914020849	0.914185656	0.945662857	0.966315385	0.96797538	0.969903605	0.988983353	0.984585903	0.99860632	1.01924576
15:43:35.040	0.930093314	0.929428145	0.868321669	0.884908944	0.895054142	0.896714775	0.92143513	0.913021542	0.913963705	0.914062448	0.945514376	0.966203598	0.967866135	0.969777233	0.988761332	0.984288683	0.998324346	1.018931329
15:43:35.990	0.930113056	0.928317688	0.868372988	0.88496766	0.895144526	0.896809972	0.921485067	0.913093565	0.914058239	0.914140111	0.945579451	0.966253095	0.967815579	0.969802144	0.988704169	0.98417106	0.998155679	1.018781637
15:43:37.027	0.930380965	0.927329609	0.868513922	0.885027765	0.895281249	0.896959929	0.92162038	0.913240724	0.914176675	0.914229298	0.945694186	0.96632118	0.967952792	0.969848893	0.988758274	0.984164218	0.998069619	1.018740591
15:43:37.978	0.931130658	0.929018367	0.868607785	0.885119242	0.895362889	0.89705255	0.921746683	0.913403322	0.914243904	0.914402361	0.945849135	0.966458951	0.968045464	0.970047751	0.988847927	0.984167391	0.998047398	1.018705659
15:43:38.928	0.931084942	0.927652323	0.868688048	0.88520511	0.895462964	0.897196906	0.921921035	0.91359465	0.914403524	0.914611591	0.946094207	0.966714763	0.968283492	0.970291836	0.989064113	0.984332086	0.998336008	1.018903178
15:43:39.965	0.930889825	0.928362693	0.868748617	0.885262709	0.895546761	0.897241495	0.922035512	0.913646749	0.914416198	0.914608373	0.946138798	0.966691146	0.968306302	0.970262393	0.988999384	0.984196351	0.998259144	1.018724803
15:43:40.915	0.930865086	0.927351567	0.868903539	0.885400415	0.895690071	0.897475309	0.92220658	0.913884871	0.914677691	0.914862765	0.946367672	0.967028192	0.968590937	0.970612098	0.989267405	0.984394113	0.99853637	1.018961257
15:43:41.866	0.930904528	0.92867099	0.869001371	0.885544851	0.895848477	0.897594838	0.922436481	0.914107283	0.914862651	0.91510276	0.946572505	0.967315229	0.968885421	0.971012723	0.989626665	0.984754802	0.998928363	1.019312046
15:43:42.902	0.931267824	0.928086099	0.86892454	0.88548034	0.895828526	0.897579555	0.922333686	0.91401538	0.914713689	0.914941547	0.946430751	0.967117688	0.968674436	0.97065994	0.989277454	0.98433916	0.998397805	1.018861852
15:43:43.853	0.930734849	0.928012543	0.869063242	0.885639529	0.895917738	0.897594845	0.922514236	0.914173375	0.914872001	0.915059897	0.946532657	0.967274163	0.968845884	0.970881201	0.989474814	0.984518637	0.998703066	1.01902891
15:43:44.803	0.931268258	0.928123314	0.868982802	0.885611687	0.895907568	0.897640414	0.922432322	0.914115504	0.914803016	0.915017444	0.946471291	0.967101139	0.968667447	0.970701295	0.989260651	0.984296871	0.9984824	1.018765624
15:43:45.754	0.930709986	0.929319149	0.869190843	0.885700053	0.896033392	0.897773795	0.922603444	0.914228176	0.914994099	0.915079319	0.946596444	0.967301912	0.968885134	0.970923145	0.989485198	0.984486219	0.998771157	1.019044377
15:43:46.790	0.930689452	0.929086717	0.869033961	0.885670983	0.895973186	0.897677769	0.922518996	0.914194324	0.914964373	0.915054394	0.946546242	0.967239029	0.968840109	0.970855219	0.98941875	0.984463357	0.998897682	1.019019937
15:43:47.741	0.931058084	0.930109946	0.869104779	0.885662874	0.895966791	0.89766799	0.922500191	0.91420575	0.91489587	0.915067505	0.946575119	0.967295731	0.968825749	0.970832457	0.989437819	0.984494242	0.99883859	1.019013449
15:43:48.691	0.931364295	0.928900902	0.869195431	0.885756201	0.89606217	0.897805566	0.922598976	0.914253747	0.915039116	0.915102303	0.946751685	0.967465492	0.96902148	0.971056137	0.989705637	0.984853394	0.999229912	1.019392002
15:43:49.728	0.930372932	0.928564264	0.869200233	0.885683498	0.895999747	0.897722778	0.922499105	0.914130221	0.914926213	0.914940562	0.946488471	0.967198851	0.968752343	0.970780999	0.989383784	0.984482313	0.998795873	1.019044074
15:43:50.678	0.930786228	0.928439276	0.869247857	0.885796838	0.896081995	0.897791383	0.922610641	0.914312931	0.915262529	0.915162828	0.946798441	0.967605523	0.969114093	0.971140326	0.989902951	0.985141246	0.999527859	1.019667378
15:43:51.629	0.930700952	0.929475256	0.869054383	0.885628805	0.895917903	0.897619782	0.922343373	0.914003831	0.914783788	0.9147736	0.946324384	0.967022128	0.968551663	0.970592929	0.989228266	0.984394607	0.998848357	1.018964266
15:43:52.579	0.931136075	0.928386363	0.869172752	0.885746258	0.89602521	0.897794562	0.922442936	0.914141279	0.914882138	0.914943078	0.946510503	0.967238683	0.968822981	0.970825974	0.989554718	0.984830671	0.999284863	1.019344703
15:43:53.616	0.930676198	0.928917042	0.869094749	0.885639617	0.895914109	0.897692218	0.922314818	0.913947176	0.914736655	0.914722162	0.946277636	0.967041979	0.96853746	0.970542011	0.989292178	0.984549204	0.999098236	1.019167194
15:43:54.566	0.930977882	0.929345183	0.869002538	0.885565634	0.895783408	0.897494738	0.922008612	0.913668663	0.914406339	0.914323187	0.945806365	0.966521591	0.968063413	0.970106325	0.988734477	0.983970312	0.998557919	1.018556528
15:43:55.517	0.929994448	0.927467245	0.869035843	0.885556436	0.895762535	0.897533151	0.922018591	0.913679432	0.914428607	0.914381511	0.945838669	0.966550921	0.968091042	0.970178768	0.988817224	0.984131381	0.998747559	1.018706519
15:43:56.554	0.931092384	0.930148116	0.869069408	0.885570941	0.895821324	0.897549064	0.922135446	0.913748845	0.914571346	0.914470393	0.945997478	0.966770954	0.968244148	0.970331543	0.989079864	0.984468517	0.999101657	1.019068299
15:43:57.504	0.931387039	0.92831301	0.869153493	0.885647507	0.895797163	0.897510149	0.922059867	0.913650593	0.914410883	0.914367597	0.945891785	0.9666892	0.96811936	0.97011921	0.988934456	0.984338967	0.999077559	1.018944028
15:43:58.454	0.930566063	0.929509384	0.869112119	0.885621775	0.895826149	0.897585543	0.922027916	0.913630889	0.914490205	0.914309984	0.945797869	0.966518037	0.968059574	0.970025463	0.988865098	0.984241363	0.999027115	1.018886158
15:43:59.491	0.930995455	0.927925514	0.869080879	0.885569975	0.895687008	0.897441817	0.921870484	0.913404949	0.914157337	0.914008246	0.945453391	0.966107008	0.967606727	0.969604463	0.988367086	0.983752772	0.998602886	1.018351198
15:45:15.091	0.930917862	0.935611231	0.872862527	0.88934166	0.900213597	0.902023457	0.927143002	0.918993638	0.919470468	0.919626808	0.950643167	0.971039759	0.972315367	0.974312422	0.992119521	0.985873745	1.00259612	1.019746435
15:45:16.042	0.93393153	0.931305768	0.87288468	0.889531291	0.900490945	0.90223166	0.927486699	0.919203183	0.919692094	0.919711137	0.95105022	0.971532563	0.972839967	0.974752762	0.992585422	0.986317416	1.003054557	1.020324992
15:45:16.992	0.934043854	0.92951819	0.872994294	0.889676078	0.900676784	0.902381044	0.927723295	0.919462651	0.919965012	0.919886549	0.951346716	0.971820596	0.973138371	0.97504862	0.992843437	0.986551389	1.003429951	1.020535937
15:45:18.029	0.933669491	0.930932094	0.873204493	0.889684403	0.900684768	0.902614936	0.927747162	0.919431491	0.919963828	0.919843536	0.951244802	0.971738763	0.973017359	0.974853921	0.992661539	0.986310887	1.003045469	1.020262365
15:45:18.979	0.933714217	0.931965817	0.873215205	0.889873081	0.900876655	0.902683011	0.928023545	0.91978815	0.920296654	0.92023754	0.951805727	0.972273867	0.973591044	0.975449555	0.993315704	0.986938962	1.003818838	1.02103756
15:45:19.930	0.933168281	0.93304532	0.873232488	0.889878761	0.900877524	0.9026589	0.927972216	0.919791702	0.9203268	0.920133819	0.951771188	0.972227333	0.973529063	0.975483122	0.993293383	0.986905833	1.003809078	1.020985132
15:45:20.880	0.934034286	0.931515758	0.873301241	0.88986464	0.900914849	0.902669266	0.92800525	0.919774516	0.920257232	0.920187565	0.951718167	0.972147593	0.973429798	0.975283402	0.993121482	0.986694944	1.003662668	1.020740601
15:45:21.917	0.934338972	0.931906394	0.87333384	0.889917808	0.900931639	0.902714549	0.928027908	0.919813985	0.920354318	0.920203674	0.951819647	0.972247429	0.973521401	0.975397396	0.99329736	0.986880362	1.003788561	1.020932851
15:45:22.867	0.933560899	0.930851375	0.873363562	0.889911091	0.900944265	0.90272695	0.928017051	0.919812307	0.920354194	0.920221034	0.951770438	0.97220866	0.97349493	0.975358423	0.993198512	0.986775716	1.003684226	1.020830887
15:45:23.818	0.933513775	0.93116198	0.873322293	0.889945698	0.900943439	0.902723299	0.928030921	0.91979818	0.920260839	0.920089257	0.951715471	0.972062485	0.973389957	0.9752109	0.993104829	0.986652416	1.003579931	1.020696355
15:45:24.854	0.933674577	0.933447642	0.873363641	0.890022012	0.901075481	0.902772988	0.928174948	0.919912852	0.920470191	0.92034583	0.951906638	0.972316493	0.973607801	0.975487723	0.993346859	0.986956384	1.003847671	1.020984984
15:45:25.805	0.933655992	0.932555707	0.873491245	0.890068909	0.901166755	0.902971278	0.928303969	0.920077661	0.920602895	0.92042173	0.952134644	0.97257838	0.973833051	0.975716171	0.993599194	0.987212891	1.004091211	1.021294826
15:45:26.755	0.933674295	0.932689818	0.873579251	0.890142449	0.901206185	0.903043842	0.928377664	0.920171693	0.920709014	0.920527076	0.952203194	0.972688717	0.97394692	0.975761509	0.993673613	0.987273924	1.004153069	1.021335407
15:45:27.792	0.933023407	0.931535485	0.873578075	0.890177499	0.901255252	0.903082761	0.928406579	0.920198805	0.920810058	0.920661101	0.952190986	0.97267477	0.973948419	0.975808518	0.99371868	0.98734067	1.004246836	1.021338059
15:45:28.742	0.933743122	0.930561353	0.873587928	0.890178782	0.901256781	0.903018398	0.928322421	0.920133215	0.92068293	0.920491013	0.952037899	0.97248443	0.973750368	0.975600994	0.993452278	0.987019034	1.004002809	1.021063791
15:45:29.693	0.933766866	0.932730968	0.873593258	0.890176012	0.901258439	0.903031824	0.928328148	0.92008955	0.920646868	0.920472019	0.951993348	0.972408969	0.973671621	0.975497006	0.99336164	0.986931532	1.003938757	1.020943589
15:45:30.643	0.933406191	0.931488114	0.873541472	0.890129467	0.901208072	0.903003985	0.928210253	0.919939426	0.920528243	0.920220785	0.951781344	0.97214552	0.973407377	0.975208485	0.993040403	0.986547727	1.003520908	1.020539369
15:45:31.680	0.933400773	0.931138534	0.873628852	0.890218545	0.901323638	0.903092704	0.928398514	0.920127307	0.920646321	0.920507363	0.951949744	0.972491424	0.97373171	0.975572811	0.99340516	0.986943709	1.004008151	1.020962998
15:45:32.630	0.934050232	0.930214779	0.873620415	0.89019378	0.901239433	0.903015656	0.928280047	0.919997319	0.920501182	0.920261237	0.951718117	0.972195523	0.973390162	0.975244006	0.993006294	0.986480353	1.003457543	1.020504909
15:45:33.581	0.934173053	0.933024945	0.873721652	0.890195058	0.901277759	0.90311384	0.928370205	0.920022868	0.920488376	0.920408933	0.951682917	0.972142478	0.973378552	0.97524125	0.992954629	0.986387408	1.003347263	1.020375966
15:45:34.618	0.93367842	0.933550117	0.873644036	0.890265404	0.90129733	0.903097401	0.928274386	0.919998126	0.920495043	0.920235892	0.951617659	0.972023226	0.973255619	0.975135701	0.992828693	0.98629065	1.003204966	1.020235875
15:45:35.568	0.93447611	0.930320701	0.873775432	0.890333218	0.901352759	0.903178914	0.928396235	0.920118342	0.920494413	0.92038256	0.95176025	0.972159078	0.973459351	0.975369235	0.993040793	0.986517223	1.003406594	1.020476975
15:45:36.518	0.934004027	0.93028564	0.873809044	0.890394578	0.901418901	0.903232178	0.928490842	0.920242792	0.920620875	0.920544373	0.951922224	0.972305361	0.973581773	0.975476826	0.993182652	0.986651104	1.003441519	1.020590782
15:45:37.555	0.934627491	0.931808794	0.873895341	0.890426646	0.901517304	0.903337057	0.928649663	0.920391658	0.920786205	0.920689165	0.952099309	0.972405141	0.973774442	0.975662824	0.993373521	0.986818324	1.003679168	1.020752964
15:45:38.506	0.934094066	0.930596949	0.874001018	0.890444378	0.901580425	0.903373567	0.928689629	0.920428661	0.92082571	0.920729259	0.952125874	0.972451029	0.973722969	0.975678857	0.993320784	0.986775119	1.003534286	1.020654112
15:45:39.456	0.934025829	0.932855869	0.874097002	0.890606967	0.901761831	0.903528906	0.928840915	0.92062037	0.921015442	0.920928555	0.952337032	0.972676849	0.973968592	0.976016585	0.993597438	0.987012303	1.003822977	1.0209188
15:45:40.493	0.933925151	0.933967954	0.874161903	0.890702268	0.901881991	0.903670559	0.929019617	0.920808925	0.921200354	0.921145329	0.952595977	0.973027206	0.974249919	0.976307079	0.993894295	0.987269084	1.004293103	1.02122146
15:45:41.443	0.934330653	0.932480686	0.874220816	0.890777528	0.901953311	0.903712654	0.929128614	0.920911485	0.921326687	0.921190741	0.952670973	0.973064791	0.974334969	0.976379749	0.993879929	0.987231933	1.004409068	1.021127547
15:45:42.394	0.934373317	0.932347402	0.874349324	0.890855287	0.902130012	0.903914998	0.929334607	0.921112317	0.921520245	0.921354447	0.952879906	0.973326002	0.974595555	0.976563776	0.99411857	0.98743307	1.004654508	1.021336136
15:45:43.344	0.934606045	0.93424832	0.874395068	0.890982588	0.902186399	0.903920795	0.929334284	0.921128992	0.92154423	0.921421075	0.9529299	0.973297712	0.974564907	0.97650636	0.994047029	0.987300213	1.004666651	1.021175081
15:45:44.381	0.93472048	0.931249428	0.874390979	0.890953531	0.902160948	0.903894927	0.929357021	0.921121717	0.921559455	0.92135033	0.952853611	0.973207268	0.974440833	0.976428315	0.993878405	0.987070606	1.004595296	1.020906115
15:45:45.331	0.934983176	0.932142299	0.87434792	0.890942435	0.902188284	0.903905479	0.929350547	0.921063743	0.921495056	0.921192807	0.952722203	0.973051319	0.974288211	0.976227572	0.993613925	0.986782725	1.004370312	1.020584228
15:45:46.282	0.934970789	0.933444282	0.874535166	0.891079044	0.902302752	0.904051037	0.929538469	0.921302168	0.921729209	0.921450637	0.9530042	0.973393912	0.974552198	0.976496322	0.99399034	0.987081349	1.004898753	1.020945905
15:45:47.318	0.935041896	0.931971684	0.874683754	0.891220538	0.902502393	0.904302165	0.92980636	0.921632754	0.922207133	0.921876553	0.953443108	0.973813686	0.975039574	0.976946843	0.994417977	0.987537291	1.005452076	1.021466036
15:45:48.269	0.934453254	0.931831456	0.874823083	0.891398955	0.902683852	0.904411379	0.930050219	0.921841596	0.922530748	0.922175783	0.953647606	0.974063501	0.975323227	0.977266224	0.994676473	0.987733075	1.005607987	1.021663885
15:45:49.219	0.934013192	0.932230048	0.874757469	0.891424892	0.902652102	0.904433517	0.92999318	0.921818135	0.922477503	0.922149857	0.953581462	0.974064682	0.975256645	0.977172763	0.994636695	0.98773541	1.005537875	1.021667402
15:45:50.256	0.934529087	0.931498483	0.874822708	0.89136714	0.90264367	0.904366134	0.929937533	0.921708758	0.922373244	0.921938699	0.953437507	0.973810622	0.974987192	0.976901469	0.994335743	0.987387604	1.005103082	1.021247451
15:45:51.206	0.935930943	0.933032307	0.874846521	0.891403246	0.902673673	0.90444448	0.930016582	0.921746327	0.922476404	0.921957646	0.95343008	0.973764444	0.974982093	0.976911129	0.994251611	0.987255978	1.005045143	1.021126385
15:45:52.157	0.935620077	0.931009648	0.874951404	0.891525728	0.902840494	0.904594663	0.930244376	0.922013681	0.922765543	0.922261173	0.953726838	0.974183606	0.975367804	0.977277047	0.994693448	0.9877447	1.00546258	1.021594223
15:45:53.107	0.934810939	0.933741392	0.874862107	0.891404314	0.902695394	0.904457723	0.929950157	0.921698968	0.922356698	0.92186864	0.953225537	0.973622901	0.974765297	0.97664842	0.993965272	0.986923774	1.004773853	1.020748231
15:45:54.144	0.934500574	0.93371656	0.874962419	0.891453597	0.902743645	0.904456025	0.929990661	0.921751157	0.922426018	0.921970134	0.953274281	0.973689434	0.974819389	0.976761348	0.994008143	0.986961683	1.004789425	1.020809801
15:45:55.094	0.934542079	0.931458582	0.874977152	0.891503475	0.902823603	0.904586412	0.930101269	0.921887362	0.92260883	0.922053213	0.953507355	0.973847945	0.975009	0.976984234	0.994219055	0.987186995	1.005027357	1.021026763
15:45:56.045	0.934950388	0.933014486	0.875099744	0.891600308	0.902946613	0.904693747	0.930297135	0.922059526	0.922769049	0.922313384	0.953697704	0.97407395	0.975246757	0.977137623	0.994484372	0.987478798	1.005212328	1.021304383
15:45:57.082	0.93441253	0.932739775	0.874996992	0.891528318	0.902850911	0.904626897	0.930159944	0.921909981	0.922584668	0.92212383	0.953398877	0.973760737	0.974879861	0.976823224	0.994070965	0.986973237	1.004861775	1.020775327
15:45:58.032	0.934826118	0.933653031	0.875092428	0.891630046	0.902907216	0.904606511	0.930194429	0.921956519	0.922589221	0.922120148	0.953371045	0.973736911	0.974907209	0.97679386	0.993985159	0.986877973	1.004784553	1.020626399
15:45:58.982	0.935063316	0.932148714	0.875165213	0.891705715	0.903026853	0.904803663	0.930350172	0.922111698	0.922735391	0.922222498	0.953596528	0.973888653	0.975070923	0.977002556	0.99417489	0.987055642	1.005103199	1.020804444
15:46:00.019	0.934580561	0.934409892	0.875354275	0.891900088	0.903292906	0.905060865	0.930742491	0.922538814	0.923102576	0.922734532	0.954256885	0.974520791	0.975660671	0.9776014	0.994857147	0.987775063	1.00589524	1.021504731
15:47:15.706	0.936252114	0.937615566	0.879033296	0.895759354	0.907939493	0.90955776	0.936120918	0.928092974	0.928522364	0.928465995	0.95992427	0.979700067	0.980706968	0.982663764	0.998458196	0.989424703	1.008876269	1.022533464
15:47:16.742	0.937643528	0.935825361	0.879214584	0.895941187	0.908241892	0.909999776	0.936724893	0.928682344	0.92912484	0.92900554	0.960421857	0.980483404	0.981404342	0.983349104	0.999445043	0.990500861	1.010052753	1.02363393
15:47:17.693	0.937738833	0.936681357	0.879466083	0.896133941	0.90851881	0.910265621	0.937064004	0.929057222	0.929469541	0.929400221	0.96093407	0.981036874	0.981978586	0.98395274	1.000063228	0.991143646	1.010695099	1.024301706
15:47:18.643	0.937889407	0.937352658	0.879250892	0.895992119	0.908318093	0.910082076	0.936722321	0.928685848	0.929028549	0.928957465	0.960367295	0.980388285	0.9813215	0.983286593	0.99935274	0.990341498	1.009925421	1.023458367
15:47:19.680	0.93777069	0.937732651	0.879269453	0.895965766	0.908243782	0.910003726	0.936626117	0.928590309	0.928998175	0.928791194	0.9602555	0.980255263	0.981188968	0.983134142	0.999199421	0.990147986	1.009797752	1.023293681
15:47:20.630	0.93752145	0.936475666	0.879217731	0.895863128	0.908152656	0.909898975	0.936502988	0.9284409	0.928802358	0.928660559	0.959980643	0.980014915	0.980960615	0.982884798	0.998914968	0.989909307	1.009494301	1.023013091
15:47:21.581	0.938273696	0.93750579	0.879179926	0.895800416	0.908024092	0.909780199	0.936285385	0.928175937	0.928549379	0.928330459	0.959638183	0.97960472	0.98051981	0.982524749	0.998494926	0.98947008	1.009031398	1.0225306
15:47:22.618	0.938298352	0.936246674	0.879305738	0.896001384	0.908266622	0.909978981	0.936679817	0.928576833	0.928935017	0.928831446	0.960291457	0.980350465	0.981280879	0.983243972	0.999341449	0.990413117	1.010012251	1.023551133
15:47:23.568	0.938261895	0.93694873	0.87946004	0.896059862	0.908302086	0.910077822	0.936731041	0.928684149	0.9290447	0.928989427	0.960484492	0.980522849	0.981445816	0.983450249	0.999524387	0.990612991	1.010327616	1.023785747
15:47:24.518	0.938065057	0.935999019	0.879346433	0.895992478	0.908285778	0.910036314	0.936592415	0.928548905	0.928882596	0.928811869	0.960266605	0.980265014	0.981213445	0.983283391	0.999242957	0.990328334	1.010165876	1.023490002
15:47:25.555	0.937756016	0.936061114	0.879256139	0.895871068	0.90813905	0.909914066	0.936455856	0.928326849	0.92865593	0.928615659	0.959931788	0.979928588	0.980819325	0.982781154	0.998837773	0.98985946	1.009764371	1.022990907
15:47:26.506	0.938047369	0.935334104	0.879284347	0.895841416	0.908060936	0.909803928	0.936347671	0.928228091	0.928482502	0.92839503	0.959663354	0.979617323	0.980475204	0.982462147	0.998404987	0.989338342	1.00932101	1.022404322
15:47:27.456	0.937365276	0.93657768	0.879351706	0.896006168	0.908275542	0.910054766	0.936610957	0.928520201	0.928778572	0.928611352	0.960100048	0.980060683	0.980975551	0.982966885	0.998888625	0.989861572	1.009827858	1.022948052
15:47:28.406	0.938209666	0.938064967	0.879378431	0.895968004	0.908226758	0.909993063	0.936549577	0.928428575	0.928655931	0.92861667	0.959916394	0.979836876	0.980731017	0.982630472	0.998563339	0.989433979	1.0094126	1.022475727
15:47:29.443	0.937800351	0.935764004	0.879545564	0.896164182	0.908455496	0.910230739	0.936841536	0.92875965	0.929001248	0.929023761	0.960413989	0.980305357	0.981218688	0.98328564	0.999113405	0.990013643	1.010073989	1.023114099
15:47:30.394	0.938333621	0.934956644	0.879707743	0.896242378	0.90859001	0.910416699	0.937039341	0.928910237	0.929193055	0.929165298	0.960528381	0.980496843	0.981385121	0.983378511	0.999288291	0.990179036	1.010240707	1.023272307
15:47:31.344	0.938054748	0.937646024	0.879669025	0.896299943	0.90864434	0.910410522	0.937103881	0.929019313	0.929288205	0.929296512	0.960644048	0.980637023	0.981529194	0.983483735	0.999411419	0.990247243	1.010357311	1.023356395
15:47:32.294	0.93818307	0.93648924	0.879805281	0.8964753	0.908822241	0.910597798	0.937294909	0.929256008	0.929568789	0.929511368	0.960862605	0.980932895	0.981785803	0.983862765	0.999735023	0.990570354	1.010725377	1.023653195
15:47:33.331	0.938358264	0.937600269	0.879771843	0.896410703	0.908764676	0.910515985	0.937209909	0.929152008	0.929492659	0.929328903	0.960643986	0.980626434	0.981500089	0.98357581	0.999360479	0.990156573	1.010291148	1.023189233
15:47:34.282	0.93808135	0.936956171	0.879773504	0.896388815	0.908777783	0.910509649	0.937234254	0.929133483	0.929480487	0.929318052	0.960602949	0.980631991	0.981490401	0.983566603	0.99926904	0.990033928	1.010227363	1.023083115
15:47:35.232	0.938604252	0.938772507	0.87976194	0.896448092	0.908846455	0.910596136	0.937283585	0.929214179	0.929524874	0.929440331	0.960699873	0.980741094	0.981558191	0.983607518	0.999388152	0.990144805	1.010443153	1.023166709
15:47:36.269	0.938531361	0.935482798	0.879928622	0.896489342	0.908910349	0.910671941	0.937379549	0.929301044	0.929616782	0.929490914	0.960738093	0.980779672	0.981638786	0.983682248	0.999438363	0.990116266	1.010472132	1.02313821
15:47:37.219	0.938741151	0.937170846	0.879965117	0.896566088	0.909029854	0.910776876	0.937488187	0.92946996	0.929877537	0.929749711	0.960946233	0.981043663	0.981828429	0.983887986	0.999610904	0.990260806	1.010713615	1.023241937
15:47:38.170	0.939106679	0.936249319	0.880203043	0.896917857	0.909451413	0.911210736	0.938180536	0.930148604	0.930829727	0.93077252	0.962034237	0.982183921	0.982960367	0.984933391	1.000781059	0.991490162	1.011944062	1.024455291
15:47:39.206	0.937955626	0.936202255	0.880200079	0.89690905	0.90931279	0.911086287	0.938016983	0.929947368	0.930574655	0.930371564	0.961632737	0.981765509	0.982518965	0.984488605	1.000194434	0.990792507	1.0110477	1.023718462
15:47:40.157	0.938707231	0.937195105	0.880340431	0.896947913	0.90946367	0.911214228	0.938173554	0.930133195	0.930802914	0.930746907	0.9618704	0.981951537	0.982678196	0.984691307	1.000372785	0.990971185	1.011318038	1.023852115
15:47:41.107	0.939169288	0.93724282	0.880411706	0.897005428	0.909549577	0.911274737	0.938269729	0.930267866	0.930989502	0.930911825	0.962040626	0.982152663	0.982884593	0.984879939	1.000551444	0.991141003	1.011481569	1.024004448
15:47:42.144	0.938766662	0.939561803	0.880478767	0.897068341	0.909593397	0.911354696	0.93836716	0.930358308	0.931178631	0.931075767	0.962174182	0.982203156	0.982960785	0.984998578	1.000593843	0.991143181	1.011517719	1.023984999
15:47:43.094	0.937807801	0.936678557	0.880458298	0.897074523	0.90966302	0.911388559	0.938359866	0.930336062	0.93109857	0.930984934	0.962097202	0.982145962	0.982907032	0.984836069	1.000488651	0.990986287	1.011414578	1.023804022
15:47:44.045	0.939098073	0.937884946	0.880525089	0.897148805	0.909773502	0.91150138	0.938463179	0.930501982	0.931267681	0.93121313	0.96227745	0.98235194	0.98314879	0.985022787	1.000734814	0.991260864	1.011777923	1.024114112
15:47:45.082	0.938794992	0.936998307	0.880455143	0.897112148	0.909658641	0.91136425	0.938282977	0.930276491	0.931075841	0.930975298	0.962023254	0.981974442	0.982792842	0.984671195	1.000306341	0.990769188	1.011191084	1.02354148
15:47:46.032	0.938569358	0.937943034	0.880443701	0.897095077	0.909721477	0.911391643	0.938385404	0.930314664	0.931042442	0.931055288	0.962100866	0.982086812	0.982869153	0.98476621	1.000388947	0.990876945	1.011307734	1.023663588
15:47:46.982	0.939459699	0.937250062	0.880448783	0.897070068	0.909581431	0.911304955	0.938206311	0.930113964	0.930835627	0.930709186	0.96172422	0.981718188	0.982451437	0.984448847	0.999912795	0.990296962	1.010593293	1.023065372
15:47:47.933	0.93921526	0.938271112	0.88048795	0.897084371	0.909675157	0.911443329	0.938339981	0.930233087	0.931001178	0.930901448	0.961938456	0.981832218	0.982674241	0.984591309	1.000100633	0.99047536	1.010741657	1.023237173
15:47:48.970	0.939270258	0.93681878	0.88053714	0.89712815	0.909632674	0.911423956	0.938325238	0.930228044	0.930959352	0.930899153	0.961837714	0.981760832	0.982566987	0.984522139	0.999976115	0.990313116	1.010527457	1.023031969
15:47:49.920	0.938834133	0.937880065	0.880595825	0.897237744	0.909787532	0.911526026	0.938473366	0.930408694	0.931111117	0.930980611	0.962072539	0.981997676	0.982782954	0.984771776	1.000238766	0.990551232	1.010856351	1.023254455
15:47:50.870	0.938409047	0.938763058	0.880831528	0.897400064	0.910027049	0.911749071	0.938850983	0.930787798	0.931446364	0.931400333	0.962508101	0.982418734	0.983312377	0.985290454	1.000756065	0.990983649	1.011201474	1.023747367
15:47:51.907	0.938593121	0.936983715	0.880966635	0.897608674	0.910270538	0.912001837	0.939190076	0.931147436	0.931883153	0.931806596	0.96295536	0.982963764	0.983856945	0.985952196	1.001307668	0.991496465	1.011685045	1.024290589
15:47:52.858	0.939110208	0.93864973	0.880971829	0.897658227	0.910366917	0.912073701	0.939283355	0.931285186	0.93201524	0.931902974	0.963127862	0.983059113	0.983968125	0.986045788	1.001358379	0.991492093	1.011719617	1.024277515
15:47:53.808	0.939471389	0.93846904	0.881065576	0.897687146	0.910384822	0.912168056	0.939350758	0.931313888	0.93200769	0.931895855	0.963063585	0.982998266	0.983859247	0.985904619	1.001191755	0.991230885	1.011409498	1.023978061
15:47:54.845	0.93922741	0.937688993	0.881087226	0.897779389	0.910463615	0.9122101	0.939506838	0.931415884	0.932175939	0.932032237	0.963195973	0.983127814	0.983930989	0.985980481	1.001224089	0.991206181	1.011314858	1.023906138
15:47:55.795	0.939018261	0.936056521	0.881269815	0.897862244	0.910560762	0.912381147	0.93960372	0.9315557	0.932209683	0.932168638	0.963326373	0.983278584	0.984071854	0.986167894	1.001371241	0.991343771	1.011483638	1.024050158
15:47:56.746	0.938698279	0.937494855	0.881201054	0.897823234	0.910567006	0.912340398	0.939515427	0.931490616	0.932283373	0.932070173	0.963311797	0.983176709	0.983984578	0.986156894	1.00124791	0.991224107	1.011286456	1.023925503
15:47:57.782	0.939508767	0.93740622	0.881185768	0.897807331	0.91050232	0.912305252	0.939477674	0.931448696	0.932108068	0.931950295	0.96322829	0.983097815	0.983935783	0.986089743	1.001217487	0.991237035	1.011207645	1.023958164
15:47:58.733	0.93927067	0.93769232	0.88120732	0.897816973	0.91055911	0.91232489	0.939533807	0.931525161	0.932195302	0.932103347	0.9634037	0.983314415	0.98408289	0.986272707	1.001494521	0.991566211	1.011488384	1.024328974
15:47:59.683	0.938325262	0.936801846	0.881137057	0.897798983	0.910401507	0.912219072	0.939347837	0.93128381	0.932004321	0.931930613	0.963093864	0.983071385	0.98390743	0.986007507	1.001331329	0.991506421	1.011316774	1.024274618
15:49:15.110	0.935373309	0.936627384	0.88037533	0.896372221	0.908540517	0.910414805	0.935898424	0.927534585	0.927717904	0.927426187	0.958377352	0.978386587	0.979509181	0.981445193	0.997560366	0.989142752	1.010677606	1.022309852
15:49:16.147	0.937442599	0.935653428	0.880251856	0.896434915	0.90850487	0.910244929	0.935915576	0.927358594	0.927735578	0.927273904	0.958326381	0.978320515	0.979377883	0.981354511	0.997401229	0.988999269	1.010620476	1.022186681
15:49:17.098	0.937347639	0.936118536	0.880299657	0.896538365	0.908549416	0.910282047	0.935931891	0.927350171	0.927729618	0.927317555	0.958262842	0.978258655	0.979318341	0.981280173	0.997344827	0.988916921	1.010554221	1.022146154
15:49:18.048	0.938141949	0.934437695	0.880261034	0.896488527	0.908443987	0.910217975	0.935766053	0.927216382	0.927497856	0.927091373	0.958093412	0.978109436	0.979138298	0.981100401	0.997175418	0.988781067	1.01038897	1.021986548
15:49:18.998	0.937740663	0.935764567	0.88009787	0.896379322	0.908329656	0.910025978	0.935573528	0.926947124	0.927310311	0.926792382	0.957755788	0.977722367	0.978762233	0.980733798	0.99675009	0.988375229	1.010015034	1.021529605
15:49:20.035	0.937406794	0.935836653	0.880068119	0.896268488	0.90822541	0.909973271	0.935387305	0.926795331	0.927114179	0.926684114	0.957571317	0.977526047	0.978607258	0.980616095	0.99660411	0.988288895	1.009864398	1.021474017
15:49:20.986	0.937341345	0.936777091	0.880012839	0.896280248	0.908200969	0.909939896	0.935404492	0.926772291	0.927129887	0.926643217	0.957577377	0.977563456	0.978597394	0.980584544	0.996712777	0.988464498	1.009999029	1.021680777
15:49:21.936	0.936884142	0.935091576	0.88002193	0.896107547	0.908002286	0.909803889	0.93517035	0.926514465	0.92682482	0.926333683	0.957179157	0.977227604	0.978254717	0.980181953	0.996318153	0.988108779	1.009698971	1.021305764
15:49:22.973	0.93723494	0.934907069	0.879897338	0.896091404	0.907934388	0.909691783	0.935031445	0.926421087	0.926722583	0.92625008	0.95706494	0.977076623	0.97812708	0.980100978	0.996187845	0.98798158	1.009609296	1.021195583
15:49:23.923	0.937246644	0.934676413	0.8799235	0.896024587	0.907895852	0.909647424	0.934937829	0.926297956	0.926537686	0.926076882	0.956901764	0.97687993	0.977964913	0.979984665	0.996015844	0.987821408	1.009408996	1.021039785
15:49:24.874	0.937308679	0.93323392	0.879821385	0.895976064	0.907802759	0.909546675	0.934810055	0.926125758	0.926400582	0.925826289	0.956670504	0.976703485	0.977717443	0.979713419	0.995742838	0.987570696	1.009112954	1.020769524
15:49:25.910	0.936859301	0.934431291	0.87996245	0.896060337	0.907873966	0.909644906	0.93490895	0.926266917	0.926587482	0.926019737	0.95696318	0.976996181	0.978030303	0.979987864	0.996167523	0.988040931	1.009540954	1.021300417
15:49:26.861	0.937248026	0.934756831	0.879890009	0.896012709	0.907849558	0.909633097	0.93483125	0.926227833	0.926511219	0.926003262	0.956940351	0.976956979	0.978051309	0.980006701	0.996230561	0.988165151	1.009803558	1.021485692
15:49:27.811	0.936339945	0.935664787	0.879825033	0.895904391	0.907697415	0.909406276	0.934604773	0.925937754	0.926186028	0.925746962	0.956548773	0.976520829	0.977598881	0.979519759	0.995751369	0.987673016	1.009276908	1.020966199
15:49:28.848	0.937270554	0.935660229	0.879898217	0.895961941	0.907764107	0.90950351	0.934749941	0.92608563	0.92640255	0.925848561	0.956779227	0.976818411	0.977904755	0.97985697	0.996168676	0.988156167	1.009843174	1.021500851
15:49:29.798	0.936824958	0.937147681	0.879820448	0.895874023	0.907686284	0.909471606	0.934650282	0.926008144	0.926285797	0.925683198	0.956664154	0.976717875	0.977798469	0.979783104	0.996046551	0.988061633	1.009715835	1.021419813
15:49:30.749	0.936306782	0.935497313	0.879815362	0.895853811	0.907734753	0.909519751	0.934668158	0.925966513	0.926266618	0.925806161	0.956756721	0.976783181	0.977861135	0.979793838	0.996188371	0.988244121	1.00984425	1.021649923
15:49:31.699	0.936858492	0.934891461	0.879733557	0.895847317	0.907633718	0.909438123	0.934566418	0.925861873	0.926171197	0.925592084	0.95658383	0.97660322	0.9776653	0.979662568	0.996003946	0.988075002	1.009590206	1.02147969
15:49:32.736	0.936521774	0.935694755	0.879760168	0.895830379	0.907643284	0.909427582	0.934557368	0.925820895	0.926172072	0.925595964	0.956530898	0.976533067	0.977667969	0.979616104	0.995952761	0.988058451	1.009547962	1.021473373
15:49:33.686	0.936307441	0.93636117	0.879810237	0.895868894	0.90771396	0.909534232	0.934721124	0.925969521	0.926280476	0.925748173	0.9567447	0.976806107	0.977842248	0.979742333	0.996177431	0.988268407	1.009672241	1.02167416
15:49:34.637	0.936937029	0.935040198	0.879793608	0.895915244	0.907750332	0.909470115	0.934716161	0.926000835	0.92633375	0.925806804	0.956794641	0.976879273	0.977914454	0.979845381	0.996258903	0.98842287	1.009657073	1.021781311
15:49:35.674	0.937167309	0.934767803	0.879792923	0.895826662	0.907673217	0.909502936	0.934584962	0.92585894	0.926160542	0.925601491	0.956538661	0.976641083	0.977642098	0.979614406	0.995951003	0.988041185	1.009230853	1.021401251
[truncated: 5,036 more rows]
