# Supplementary material for: Measurements of spectral irradiance during the solar eclipse of 21 August 2017: reassessment of the effect of solar limb darkening and of changes in total ozone
Source: Copernicus journal article supplement (doi:10.5194/acp-2018-1048), 2018-11-02
Supplement: Supplementary file 1 [file acp-2018-1048-supplement.zip › Fig11c_Theory_Neckel.csv]

Time (UT)	306 (1)	306 (2)	315	320	340 (1)	340 (2)	380	395	412	443	490	532	555 (1)	555 (2)	665	875	940	1020	Geometric
14:35:14.582	1	1	1	1	1	1	1	1	1	1	1	1	1	1	1	1	1	1	1
14:35:15.619	1	1	1	1	1	1	1	1	1	1	1	1	1	1	1	1	1	1	1
14:35:16.570	1	1	1	1	1	1	1	1	1	1	1	1	1	1	1	1	1	1	1
14:35:17.520	1	1	1	1	1	1	1	1	1	1	1	1	1	1	1	1	1	1	1
14:35:18.470	1	1	1	1	1	1	1	1	1	1	1	1	1	1	1	1	1	1	1
14:35:19.507	1	1	1	1	1	1	1	1	1	1	1	1	1	1	1	1	1	1	1
14:35:20.458	1	1	1	1	1	1	1	1	1	1	1	1	1	1	1	1	1	1	1
14:35:21.408	1	1	1	1	1	1	1	1	1	1	1	1	1	1	1	1	1	1	1
14:35:22.445	1	1	1	1	1	1	1	1	1	1	1	1	1	1	1	1	1	1	1
14:35:23.395	1	1	1	1	1	1	1	1	1	1	1	1	1	1	1	1	1	1	1
14:35:24.346	1	1	1	1	1	1	1	1	1	1	1	1	1	1	1	1	1	1	1
14:35:25.382	1	1	1	1	1	1	1	1	1	1	1	1	1	1	1	1	1	1	1
14:35:26.333	1	1	1	1	1	1	1	1	1	1	1	1	1	1	1	1	1	1	1
14:35:27.283	1	1	1	1	1	1	1	1	1	1	1	1	1	1	1	1	1	1	1
14:35:28.234	1	1	1	1	1	1	1	1	1	1	1	1	1	1	1	1	1	1	1
14:35:29.270	1	1	1	1	1	1	1	1	1	1	1	1	1	1	1	1	1	1	1
14:35:30.221	1	1	1	1	1	1	1	1	1	1	1	1	1	1	1	1	1	1	1
14:35:31.171	1	1	1	1	1	1	1	1	1	1	1	1	1	1	1	1	1	1	1
14:35:32.208	1	1	1	1	1	1	1	1	1	1	1	1	1	1	1	1	1	1	1
14:35:33.158	1	1	1	1	1	1	1	1	1	1	1	1	1	1	1	1	1	1	1
14:35:34.109	1	1	1	1	1	1	1	1	1	1	1	1	1	1	1	1	1	1	1
14:35:35.146	1	1	1	1	1	1	1	1	1	1	1	1	1	1	1	1	1	1	1
14:35:36.096	1	1	1	1	1	1	1	1	1	1	1	1	1	1	1	1	1	1	1
14:35:37.046	1	1	1	1	1	1	1	1	1	1	1	1	1	1	1	1	1	1	1
14:35:38.083	1	1	1	1	1	1	1	1	1	1	1	1	1	1	1	1	1	1	1
14:35:39.034	1	1	1	1	1	1	1	1	1	1	1	1	1	1	1	1	1	1	1
14:35:39.984	1	1	1	1	1	1	1	1	1	1	1	1	1	1	1	1	1	1	1
14:35:40.934	1	1	1	1	1	1	1	1	1	1	1	1	1	1	1	1	1	1	1
14:35:41.971	1	1	1	1	1	1	1	1	1	1	1	1	1	1	1	1	1	1	1
14:35:42.922	1	1	1	1	1	1	1	1	1	1	1	1	1	1	1	1	1	1	1
14:35:43.872	1	1	1	1	1	1	1	1	1	1	1	1	1	1	1	1	1	1	1
14:35:44.909	1	1	1	1	1	1	1	1	1	1	1	1	1	1	1	1	1	1	1
14:35:45.859	1	1	1	1	1	1	1	1	1	1	1	1	1	1	1	1	1	1	1
14:35:46.810	1	1	1	1	1	1	1	1	1	1	1	1	1	1	1	1	1	1	1
14:35:47.846	1	1	1	1	1	1	1	1	1	1	1	1	1	1	1	1	1	1	1
14:35:48.797	1	1	1	1	1	1	1	1	1	1	1	1	1	1	1	1	1	1	1
14:35:49.747	1	1	1	1	1	1	1	1	1	1	1	1	1	1	1	1	1	1	1
14:35:50.698	1	1	1	1	1	1	1	1	1	1	1	1	1	1	1	1	1	1	1
14:35:51.734	1	1	1	1	1	1	1	1	1	1	1	1	1	1	1	1	1	1	1
14:35:52.685	1	1	1	1	1	1	1	1	1	1	1	1	1	1	1	1	1	1	1
14:35:53.635	1	1	1	1	1	1	1	1	1	1	1	1	1	1	1	1	1	1	1
14:35:54.672	1	1	1	1	1	1	1	1	1	1	1	1	1	1	1	1	1	1	1
14:35:55.622	1	1	1	1	1	1	1	1	1	1	1	1	1	1	1	1	1	1	1
14:35:56.573	1	1	1	1	1	1	1	1	1	1	1	1	1	1	1	1	1	1	1
14:35:57.523	1	1	1	1	1	1	1	1	1	1	1	1	1	1	1	1	1	1	1
14:35:58.560	1	1	1	1	1	1	1	1	1	1	1	1	1	1	1	1	1	1	1
14:35:59.510	1	1	1	1	1	1	1	1	1	1	1	1	1	1	1	1	1	1	1
14:36:00.547	1	1	1	1	1	1	1	1	1	1	1	1	1	1	1	1	1	1	1
14:37:15.715	1	1	1	1	1	1	1	1	1	1	1	1	1	1	1	1	1	1	1
14:37:16.752	1	1	1	1	1	1	1	1	1	1	1	1	1	1	1	1	1	1	1
14:37:17.702	1	1	1	1	1	1	1	1	1	1	1	1	1	1	1	1	1	1	1
14:37:18.653	1	1	1	1	1	1	1	1	1	1	1	1	1	1	1	1	1	1	1
14:37:19.690	1	1	1	1	1	1	1	1	1	1	1	1	1	1	1	1	1	1	1
14:37:20.640	1	1	1	1	1	1	1	1	1	1	1	1	1	1	1	1	1	1	1
14:37:21.590	1	1	1	1	1	1	1	1	1	1	1	1	1	1	1	1	1	1	1
14:37:22.627	1	1	1	1	1	1	1	1	1	1	1	1	1	1	1	1	1	1	1
14:37:23.578	1	1	1	1	1	1	1	1	1	1	1	1	1	1	1	1	1	1	1
14:37:24.528	1	1	1	1	1	1	1	1	1	1	1	1	1	1	1	1	1	1	1
14:37:25.565	1	1	1	1	1	1	1	1	1	1	1	1	1	1	1	1	1	1	1
14:37:26.515	1	1	1	1	1	1	1	1	1	1	1	1	1	1	1	1	1	1	1
14:37:27.466	1	1	1	1	1	1	1	1	1	1	1	1	1	1	1	1	1	1	1
14:37:28.502	1	1	1	1	1	1	1	1	1	1	1	1	1	1	1	1	1	1	1
14:37:29.453	1	1	1	1	1	1	1	1	1	1	1	1	1	1	1	1	1	1	1
14:37:30.403	1	1	1	1	1	1	1	1	1	1	1	1	1	1	1	1	1	1	1
14:37:31.354	1	1	1	1	1	1	1	1	1	1	1	1	1	1	1	1	1	1	1
14:37:32.390	1	1	1	1	1	1	1	1	1	1	1	1	1	1	1	1	1	1	1
14:37:33.341	1	1	1	1	1	1	1	1	1	1	1	1	1	1	1	1	1	1	1
14:37:34.291	1	1	1	1	1	1	1	1	1	1	1	1	1	1	1	1	1	1	1
14:37:35.328	1	1	1	1	1	1	1	1	1	1	1	1	1	1	1	1	1	1	1
14:37:36.278	1	1	1	1	1	1	1	1	1	1	1	1	1	1	1	1	1	1	1
14:37:37.229	1	1	1	1	1	1	1	1	1	1	1	1	1	1	1	1	1	1	1
14:37:38.266	1	1	1	1	1	1	1	1	1	1	1	1	1	1	1	1	1	1	1
14:37:39.216	1	1	1	1	1	1	1	1	1	1	1	1	1	1	1	1	1	1	1
14:37:40.166	1	1	1	1	1	1	1	1	1	1	1	1	1	1	1	1	1	1	1
14:37:41.117	1	1	1	1	1	1	1	1	1	1	1	1	1	1	1	1	1	1	1
14:37:42.154	1	1	1	1	1	1	1	1	1	1	1	1	1	1	1	1	1	1	1
14:37:43.104	1	1	1	1	1	1	1	1	1	1	1	1	1	1	1	1	1	1	1
14:37:44.054	1	1	1	1	1	1	1	1	1	1	1	1	1	1	1	1	1	1	1
14:37:45.091	1	1	1	1	1	1	1	1	1	1	1	1	1	1	1	1	1	1	1
14:37:46.042	1	1	1	1	1	1	1	1	1	1	1	1	1	1	1	1	1	1	1
14:37:46.992	1	1	1	1	1	1	1	1	1	1	1	1	1	1	1	1	1	1	1
14:37:47.942	1	1	1	1	1	1	1	1	1	1	1	1	1	1	1	1	1	1	1
14:37:48.979	1	1	1	1	1	1	1	1	1	1	1	1	1	1	1	1	1	1	1
14:37:49.930	1	1	1	1	1	1	1	1	1	1	1	1	1	1	1	1	1	1	1
14:37:50.880	1	1	1	1	1	1	1	1	1	1	1	1	1	1	1	1	1	1	1
14:37:51.917	1	1	1	1	1	1	1	1	1	1	1	1	1	1	1	1	1	1	1
14:37:52.867	1	1	1	1	1	1	1	1	1	1	1	1	1	1	1	1	1	1	1
14:37:53.818	1	1	1	1	1	1	1	1	1	1	1	1	1	1	1	1	1	1	1
14:37:54.854	1	1	1	1	1	1	1	1	1	1	1	1	1	1	1	1	1	1	1
14:37:55.805	1	1	1	1	1	1	1	1	1	1	1	1	1	1	1	1	1	1	1
14:37:56.755	1	1	1	1	1	1	1	1	1	1	1	1	1	1	1	1	1	1	1
14:37:57.792	1	1	1	1	1	1	1	1	1	1	1	1	1	1	1	1	1	1	1
14:37:58.742	1	1	1	1	1	1	1	1	1	1	1	1	1	1	1	1	1	1	1
14:37:59.693	1	1	1	1	1	1	1	1	1	1	1	1	1	1	1	1	1	1	1
14:39:15.466	1	1	1	1	1	1	1	1	1	1	1	1	1	1	1	1	1	1	1
14:39:16.502	1	1	1	1	1	1	1	1	1	1	1	1	1	1	1	1	1	1	1
14:39:17.453	1	1	1	1	1	1	1	1	1	1	1	1	1	1	1	1	1	1	1
14:39:18.403	1	1	1	1	1	1	1	1	1	1	1	1	1	1	1	1	1	1	1
14:39:19.440	1	1	1	1	1	1	1	1	1	1	1	1	1	1	1	1	1	1	1
14:39:20.390	1	1	1	1	1	1	1	1	1	1	1	1	1	1	1	1	1	1	1
14:39:21.341	1	1	1	1	1	1	1	1	1	1	1	1	1	1	1	1	1	1	1
14:39:22.291	1	1	1	1	1	1	1	1	1	1	1	1	1	1	1	1	1	1	1
14:39:23.328	1	1	1	1	1	1	1	1	1	1	1	1	1	1	1	1	1	1	1
14:39:24.278	1	1	1	1	1	1	1	1	1	1	1	1	1	1	1	1	1	1	1
14:39:25.229	1	1	1	1	1	1	1	1	1	1	1	1	1	1	1	1	1	1	1
14:39:26.266	1	1	1	1	1	1	1	1	1	1	1	1	1	1	1	1	1	1	1
14:39:27.216	1	1	1	1	1	1	1	1	1	1	1	1	1	1	1	1	1	1	1
14:39:28.166	1	1	1	1	1	1	1	1	1	1	1	1	1	1	1	1	1	1	1
14:39:29.203	1	1	1	1	1	1	1	1	1	1	1	1	1	1	1	1	1	1	1
14:39:30.154	1	1	1	1	1	1	1	1	1	1	1	1	1	1	1	1	1	1	1
14:39:31.104	1	1	1	1	1	1	1	1	1	1	1	1	1	1	1	1	1	1	1
14:39:32.141	1	1	1	1	1	1	1	1	1	1	1	1	1	1	1	1	1	1	1
14:39:33.091	1	1	1	1	1	1	1	1	1	1	1	1	1	1	1	1	1	1	1
14:39:34.042	1	1	1	1	1	1	1	1	1	1	1	1	1	1	1	1	1	1	1
14:39:34.992	1	1	1	1	1	1	1	1	1	1	1	1	1	1	1	1	1	1	1
14:39:36.029	1	1	1	1	1	1	1	1	1	1	1	1	1	1	1	1	1	1	1
14:39:36.979	1	1	1	1	1	1	1	1	1	1	1	1	1	1	1	1	1	1	1
14:39:37.930	1	1	1	1	1	1	1	1	1	1	1	1	1	1	1	1	1	1	1
14:39:38.966	1	1	1	1	1	1	1	1	1	1	1	1	1	1	1	1	1	1	1
14:39:39.917	1	1	1	1	1	1	1	1	1	1	1	1	1	1	1	1	1	1	1
14:39:40.867	1	1	1	1	1	1	1	1	1	1	1	1	1	1	1	1	1	1	1
14:39:41.904	1	1	1	1	1	1	1	1	1	1	1	1	1	1	1	1	1	1	1
14:39:42.854	1	1	1	1	1	1	1	1	1	1	1	1	1	1	1	1	1	1	1
14:39:43.805	1	1	1	1	1	1	1	1	1	1	1	1	1	1	1	1	1	1	1
14:39:44.755	1	1	1	1	1	1	1	1	1	1	1	1	1	1	1	1	1	1	1
14:39:45.792	1	1	1	1	1	1	1	1	1	1	1	1	1	1	1	1	1	1	1
14:39:46.742	1	1	1	1	1	1	1	1	1	1	1	1	1	1	1	1	1	1	1
14:39:47.693	1	1	1	1	1	1	1	1	1	1	1	1	1	1	1	1	1	1	1
14:39:48.730	1	1	1	1	1	1	1	1	1	1	1	1	1	1	1	1	1	1	1
14:39:49.680	1	1	1	1	1	1	1	1	1	1	1	1	1	1	1	1	1	1	1
14:39:50.630	1	1	1	1	1	1	1	1	1	1	1	1	1	1	1	1	1	1	1
14:39:51.667	1	1	1	1	1	1	1	1	1	1	1	1	1	1	1	1	1	1	1
14:39:52.618	1	1	1	1	1	1	1	1	1	1	1	1	1	1	1	1	1	1	1
14:39:53.568	1	1	1	1	1	1	1	1	1	1	1	1	1	1	1	1	1	1	1
14:39:54.518	1	1	1	1	1	1	1	1	1	1	1	1	1	1	1	1	1	1	1
14:39:55.555	1	1	1	1	1	1	1	1	1	1	1	1	1	1	1	1	1	1	1
14:39:56.506	1	1	1	1	1	1	1	1	1	1	1	1	1	1	1	1	1	1	1
14:39:57.456	1	1	1	1	1	1	1	1	1	1	1	1	1	1	1	1	1	1	1
14:39:58.493	1	1	1	1	1	1	1	1	1	1	1	1	1	1	1	1	1	1	1
14:39:59.443	1	1	1	1	1	1	1	1	1	1	1	1	1	1	1	1	1	1	1
14:40:00.394	1	1	1	1	1	1	1	1	1	1	1	1	1	1	1	1	1	1	1
14:41:15.907	1	1	1	1	1	1	1	1	1	1	1	1	1	1	1	1	1	1	1
14:41:16.858	1	1	1	1	1	1	1	1	1	1	1	1	1	1	1	1	1	1	1
14:41:17.808	1	1	1	1	1	1	1	1	1	1	1	1	1	1	1	1	1	1	1
14:41:18.845	1	1	1	1	1	1	1	1	1	1	1	1	1	1	1	1	1	1	1
14:41:19.795	1	1	1	1	1	1	1	1	1	1	1	1	1	1	1	1	1	1	1
14:41:20.746	1	1	1	1	1	1	1	1	1	1	1	1	1	1	1	1	1	1	1
14:41:21.696	1	1	1	1	1	1	1	1	1	1	1	1	1	1	1	1	1	1	1
14:41:22.733	1	1	1	1	1	1	1	1	1	1	1	1	1	1	1	1	1	1	1
14:41:23.683	1	1	1	1	1	1	1	1	1	1	1	1	1	1	1	1	1	1	1
14:41:24.634	1	1	1	1	1	1	1	1	1	1	1	1	1	1	1	1	1	1	1
14:41:25.670	1	1	1	1	1	1	1	1	1	1	1	1	1	1	1	1	1	1	1
14:41:26.621	1	1	1	1	1	1	1	1	1	1	1	1	1	1	1	1	1	1	1
14:41:27.571	1	1	1	1	1	1	1	1	1	1	1	1	1	1	1	1	1	1	1
14:41:28.608	1	1	1	1	1	1	1	1	1	1	1	1	1	1	1	1	1	1	1
14:41:29.558	1	1	1	1	1	1	1	1	1	1	1	1	1	1	1	1	1	1	1
14:41:30.509	1	1	1	1	1	1	1	1	1	1	1	1	1	1	1	1	1	1	1
14:41:31.459	1	1	1	1	1	1	1	1	1	1	1	1	1	1	1	1	1	1	1
14:41:32.496	1	1	1	1	1	1	1	1	1	1	1	1	1	1	1	1	1	1	1
14:41:33.446	1	1	1	1	1	1	1	1	1	1	1	1	1	1	1	1	1	1	1
14:41:34.397	1	1	1	1	1	1	1	1	1	1	1	1	1	1	1	1	1	1	1
14:41:35.434	1	1	1	1	1	1	1	1	1	1	1	1	1	1	1	1	1	1	1
14:41:36.384	1	1	1	1	1	1	1	1	1	1	1	1	1	1	1	1	1	1	1
14:41:37.334	1	1	1	1	1	1	1	1	1	1	1	1	1	1	1	1	1	1	1
14:41:38.371	1	1	1	1	1	1	1	1	1	1	1	1	1	1	1	1	1	1	1
14:41:39.322	1	1	1	1	1	1	1	1	1	1	1	1	1	1	1	1	1	1	1
14:41:40.272	1	1	1	1	1	1	1	1	1	1	1	1	1	1	1	1	1	1	1
14:41:41.309	1	1	1	1	1	1	1	1	1	1	1	1	1	1	1	1	1	1	1
14:41:42.259	1	1	1	1	1	1	1	1	1	1	1	1	1	1	1	1	1	1	1
14:41:43.210	1	1	1	1	1	1	1	1	1	1	1	1	1	1	1	1	1	1	1
14:41:44.160	1	1	1	1	1	1	1	1	1	1	1	1	1	1	1	1	1	1	1
14:41:45.197	1	1	1	1	1	1	1	1	1	1	1	1	1	1	1	1	1	1	1
14:41:46.147	1	1	1	1	1	1	1	1	1	1	1	1	1	1	1	1	1	1	1
14:41:47.098	1	1	1	1	1	1	1	1	1	1	1	1	1	1	1	1	1	1	1
14:41:48.134	1	1	1	1	1	1	1	1	1	1	1	1	1	1	1	1	1	1	1
14:41:49.085	1	1	1	1	1	1	1	1	1	1	1	1	1	1	1	1	1	1	1
14:41:50.035	1	1	1	1	1	1	1	1	1	1	1	1	1	1	1	1	1	1	1
14:41:51.072	1	1	1	1	1	1	1	1	1	1	1	1	1	1	1	1	1	1	1
14:41:52.022	1	1	1	1	1	1	1	1	1	1	1	1	1	1	1	1	1	1	1
14:41:52.973	1	1	1	1	1	1	1	1	1	1	1	1	1	1	1	1	1	1	1
14:41:54.010	1	1	1	1	1	1	1	1	1	1	1	1	1	1	1	1	1	1	1
14:41:54.960	1	1	1	1	1	1	1	1	1	1	1	1	1	1	1	1	1	1	1
14:41:55.910	1	1	1	1	1	1	1	1	1	1	1	1	1	1	1	1	1	1	1
14:41:56.861	1	1	1	1	1	1	1	1	1	1	1	1	1	1	1	1	1	1	1
14:41:57.898	1	1	1	1	1	1	1	1	1	1	1	1	1	1	1	1	1	1	1
14:41:58.848	1	1	1	1	1	1	1	1	1	1	1	1	1	1	1	1	1	1	1
14:41:59.798	1	1	1	1	1	1	1	1	1	1	1	1	1	1	1	1	1	1	1
14:43:15.658	1	1	1	1	1	1	1	1	1	1	1	1	1	1	1	1	1	1	1
14:43:16.694	1	1	1	1	1	1	1	1	1	1	1	1	1	1	1	1	1	1	1
14:43:17.645	1	1	1	1	1	1	1	1	1	1	1	1	1	1	1	1	1	1	1
14:43:18.595	1	1	1	1	1	1	1	1	1	1	1	1	1	1	1	1	1	1	1
14:43:19.632	1	1	1	1	1	1	1	1	1	1	1	1	1	1	1	1	1	1	1
14:43:20.582	1	1	1	1	1	1	1	1	1	1	1	1	1	1	1	1	1	1	1
14:43:21.533	1	1	1	1	1	1	1	1	1	1	1	1	1	1	1	1	1	1	1
14:43:22.483	1	1	1	1	1	1	1	1	1	1	1	1	1	1	1	1	1	1	1
14:43:23.520	1	1	1	1	1	1	1	1	1	1	1	1	1	1	1	1	1	1	1
14:43:24.470	1	1	1	1	1	1	1	1	1	1	1	1	1	1	1	1	1	1	1
14:43:25.421	1	1	1	1	1	1	1	1	1	1	1	1	1	1	1	1	1	1	1
14:43:26.458	1	1	1	1	1	1	1	1	1	1	1	1	1	1	1	1	1	1	1
14:43:27.408	1	1	1	1	1	1	1	1	1	1	1	1	1	1	1	1	1	1	1
14:43:28.358	1	1	1	1	1	1	1	1	1	1	1	1	1	1	1	1	1	1	1
14:43:29.395	1	1	1	1	1	1	1	1	1	1	1	1	1	1	1	1	1	1	1
14:43:30.346	1	1	1	1	1	1	1	1	1	1	1	1	1	1	1	1	1	1	1
14:43:31.296	1	1	1	1	1	1	1	1	1	1	1	1	1	1	1	1	1	1	1
14:43:32.246	1	1	1	1	1	1	1	1	1	1	1	1	1	1	1	1	1	1	1
14:43:33.283	1	1	1	1	1	1	1	1	1	1	1	1	1	1	1	1	1	1	1
14:43:34.234	1	1	1	1	1	1	1	1	1	1	1	1	1	1	1	1	1	1	1
14:43:35.184	1	1	1	1	1	1	1	1	1	1	1	1	1	1	1	1	1	1	1
14:43:36.221	1	1	1	1	1	1	1	1	1	1	1	1	1	1	1	1	1	1	1
14:43:37.171	1	1	1	1	1	1	1	1	1	1	1	1	1	1	1	1	1	1	1
14:43:38.122	1	1	1	1	1	1	1	1	1	1	1	1	1	1	1	1	1	1	1
14:43:39.158	1	1	1	1	1	1	1	1	1	1	1	1	1	1	1	1	1	1	1
14:43:40.109	1	1	1	1	1	1	1	1	1	1	1	1	1	1	1	1	1	1	1
14:43:41.059	1	1	1	1	1	1	1	1	1	1	1	1	1	1	1	1	1	1	1
14:43:42.096	1	1	1	1	1	1	1	1	1	1	1	1	1	1	1	1	1	1	1
14:43:43.046	1	1	1	1	1	1	1	1	1	1	1	1	1	1	1	1	1	1	1
14:43:43.997	1	1	1	1	1	1	1	1	1	1	1	1	1	1	1	1	1	1	1
14:43:44.947	1	1	1	1	1	1	1	1	1	1	1	1	1	1	1	1	1	1	1
14:43:45.984	1	1	1	1	1	1	1	1	1	1	1	1	1	1	1	1	1	1	1
14:43:46.934	1	1	1	1	1	1	1	1	1	1	1	1	1	1	1	1	1	1	1
14:43:47.885	1	1	1	1	1	1	1	1	1	1	1	1	1	1	1	1	1	1	1
14:43:48.922	1	1	1	1	1	1	1	1	1	1	1	1	1	1	1	1	1	1	1
14:43:49.872	1	1	1	1	1	1	1	1	1	1	1	1	1	1	1	1	1	1	1
14:43:50.822	1	1	1	1	1	1	1	1	1	1	1	1	1	1	1	1	1	1	1
14:43:51.859	1	1	1	1	1	1	1	1	1	1	1	1	1	1	1	1	1	1	1
14:43:52.810	1	1	1	1	1	1	1	1	1	1	1	1	1	1	1	1	1	1	1
14:43:53.760	1	1	1	1	1	1	1	1	1	1	1	1	1	1	1	1	1	1	1
14:43:54.710	1	1	1	1	1	1	1	1	1	1	1	1	1	1	1	1	1	1	1
14:43:55.747	1	1	1	1	1	1	1	1	1	1	1	1	1	1	1	1	1	1	1
14:43:56.698	1	1	1	1	1	1	1	1	1	1	1	1	1	1	1	1	1	1	1
14:43:57.648	1	1	1	1	1	1	1	1	1	1	1	1	1	1	1	1	1	1	1
14:43:58.685	1	1	1	1	1	1	1	1	1	1	1	1	1	1	1	1	1	1	1
14:43:59.635	1	1	1	1	1	1	1	1	1	1	1	1	1	1	1	1	1	1	1
14:45:15.322	1	1	1	1	1	1	1	1	1	1	1	1	1	1	1	1	1	1	1
14:45:16.358	1	1	1	1	1	1	1	1	1	1	1	1	1	1	1	1	1	1	1
14:45:17.309	1	1	1	1	1	1	1	1	1	1	1	1	1	1	1	1	1	1	1
14:45:18.259	1	1	1	1	1	1	1	1	1	1	1	1	1	1	1	1	1	1	1
14:45:19.210	1	1	1	1	1	1	1	1	1	1	1	1	1	1	1	1	1	1	1
14:45:20.246	1	1	1	1	1	1	1	1	1	1	1	1	1	1	1	1	1	1	1
14:45:21.197	1	1	1	1	1	1	1	1	1	1	1	1	1	1	1	1	1	1	1
14:45:22.147	1	1	1	1	1	1	1	1	1	1	1	1	1	1	1	1	1	1	1
14:45:23.184	1	1	1	1	1	1	1	1	1	1	1	1	1	1	1	1	1	1	1
14:45:24.134	1	1	1	1	1	1	1	1	1	1	1	1	1	1	1	1	1	1	1
14:45:25.085	1	1	1	1	1	1	1	1	1	1	1	1	1	1	1	1	1	1	1
14:45:26.122	1	1	1	1	1	1	1	1	1	1	1	1	1	1	1	1	1	1	1
14:45:27.072	1	1	1	1	1	1	1	1	1	1	1	1	1	1	1	1	1	1	1
14:45:28.022	1	1	1	1	1	1	1	1	1	1	1	1	1	1	1	1	1	1	1
14:45:29.059	1	1	1	1	1	1	1	1	1	1	1	1	1	1	1	1	1	1	1
14:45:30.010	1	1	1	1	1	1	1	1	1	1	1	1	1	1	1	1	1	1	1
14:45:30.960	1	1	1	1	1	1	1	1	1	1	1	1	1	1	1	1	1	1	1
14:45:31.910	1	1	1	1	1	1	1	1	1	1	1	1	1	1	1	1	1	1	1
14:45:32.947	1	1	1	1	1	1	1	1	1	1	1	1	1	1	1	1	1	1	1
14:45:33.898	1	1	1	1	1	1	1	1	1	1	1	1	1	1	1	1	1	1	1
14:45:34.848	1	1	1	1	1	1	1	1	1	1	1	1	1	1	1	1	1	1	1
14:45:35.885	1	1	1	1	1	1	1	1	1	1	1	1	1	1	1	1	1	1	1
14:45:36.835	1	1	1	1	1	1	1	1	1	1	1	1	1	1	1	1	1	1	1
14:45:37.786	1	1	1	1	1	1	1	1	1	1	1	1	1	1	1	1	1	1	1
14:45:38.822	1	1	1	1	1	1	1	1	1	1	1	1	1	1	1	1	1	1	1
14:45:39.773	1	1	1	1	1	1	1	1	1	1	1	1	1	1	1	1	1	1	1
14:45:40.723	1	1	1	1	1	1	1	1	1	1	1	1	1	1	1	1	1	1	1
14:45:41.674	1	1	1	1	1	1	1	1	1	1	1	1	1	1	1	1	1	1	1
14:45:42.710	1	1	1	1	1	1	1	1	1	1	1	1	1	1	1	1	1	1	1
14:45:43.661	1	1	1	1	1	1	1	1	1	1	1	1	1	1	1	1	1	1	1
14:45:44.611	1	1	1	1	1	1	1	1	1	1	1	1	1	1	1	1	1	1	1
14:45:45.648	1	1	1	1	1	1	1	1	1	1	1	1	1	1	1	1	1	1	1
14:45:46.598	1	1	1	1	1	1	1	1	1	1	1	1	1	1	1	1	1	1	1
14:45:47.549	1	1	1	1	1	1	1	1	1	1	1	1	1	1	1	1	1	1	1
14:45:48.586	1	1	1	1	1	1	1	1	1	1	1	1	1	1	1	1	1	1	1
14:45:49.536	1	1	1	1	1	1	1	1	1	1	1	1	1	1	1	1	1	1	1
14:45:50.486	1	1	1	1	1	1	1	1	1	1	1	1	1	1	1	1	1	1	1
14:45:51.437	1	1	1	1	1	1	1	1	1	1	1	1	1	1	1	1	1	1	1
14:45:52.474	1	1	1	1	1	1	1	1	1	1	1	1	1	1	1	1	1	1	1
14:45:53.424	1	1	1	1	1	1	1	1	1	1	1	1	1	1	1	1	1	1	1
14:45:54.374	1	1	1	1	1	1	1	1	1	1	1	1	1	1	1	1	1	1	1
14:45:55.411	1	1	1	1	1	1	1	1	1	1	1	1	1	1	1	1	1	1	1
14:45:56.362	1	1	1	1	1	1	1	1	1	1	1	1	1	1	1	1	1	1	1
14:45:57.312	1	1	1	1	1	1	1	1	1	1	1	1	1	1	1	1	1	1	1
14:45:58.349	1	1	1	1	1	1	1	1	1	1	1	1	1	1	1	1	1	1	1
14:45:59.299	1	1	1	1	1	1	1	1	1	1	1	1	1	1	1	1	1	1	1
14:46:00.250	1	1	1	1	1	1	1	1	1	1	1	1	1	1	1	1	1	1	1
14:47:15.418	1	1	1	1	1	1	1	1	1	1	1	1	1	1	1	1	1	1	1
14:47:16.368	1	1	1	1	1	1	1	1	1	1	1	1	1	1	1	1	1	1	1
14:47:17.318	1	1	1	1	1	1	1	1	1	1	1	1	1	1	1	1	1	1	1
14:47:18.355	1	1	1	1	1	1	1	1	1	1	1	1	1	1	1	1	1	1	1
14:47:19.306	1	1	1	1	1	1	1	1	1	1	1	1	1	1	1	1	1	1	1
14:47:20.256	1	1	1	1	1	1	1	1	1	1	1	1	1	1	1	1	1	1	1
14:47:21.206	1	1	1	1	1	1	1	1	1	1	1	1	1	1	1	1	1	1	1
14:47:22.243	1	1	1	1	1	1	1	1	1	1	1	1	1	1	1	1	1	1	1
14:47:23.194	1	1	1	1	1	1	1	1	1	1	1	1	1	1	1	1	1	1	1
14:47:24.144	1	1	1	1	1	1	1	1	1	1	1	1	1	1	1	1	1	1	1
14:47:25.181	1	1	1	1	1	1	1	1	1	1	1	1	1	1	1	1	1	1	1
14:47:26.131	1	1	1	1	1	1	1	1	1	1	1	1	1	1	1	1	1	1	1
14:47:27.082	1	1	1	1	1	1	1	1	1	1	1	1	1	1	1	1	1	1	1
14:47:28.118	1	1	1	1	1	1	1	1	1	1	1	1	1	1	1	1	1	1	1
14:47:29.069	1	1	1	1	1	1	1	1	1	1	1	1	1	1	1	1	1	1	1
14:47:30.019	1	1	1	1	1	1	1	1	1	1	1	1	1	1	1	1	1	1	1
14:47:31.056	1	1	1	1	1	1	1	1	1	1	1	1	1	1	1	1	1	1	1
14:47:32.006	1	1	1	1	1	1	1	1	1	1	1	1	1	1	1	1	1	1	1
14:47:32.957	1	1	1	1	1	1	1	1	1	1	1	1	1	1	1	1	1	1	1
14:47:33.907	1	1	1	1	1	1	1	1	1	1	1	1	1	1	1	1	1	1	1
14:47:34.944	1	1	1	1	1	1	1	1	1	1	1	1	1	1	1	1	1	1	1
14:47:35.894	1	1	1	1	1	1	1	1	1	1	1	1	1	1	1	1	1	1	1
14:47:36.845	1	1	1	1	1	1	1	1	1	1	1	1	1	1	1	1	1	1	1
14:47:37.882	1	1	1	1	1	1	1	1	1	1	1	1	1	1	1	1	1	1	1
14:47:38.832	1	1	1	1	1	1	1	1	1	1	1	1	1	1	1	1	1	1	1
14:47:39.782	1	1	1	1	1	1	1	1	1	1	1	1	1	1	1	1	1	1	1
14:47:40.733	1	1	1	1	1	1	1	1	1	1	1	1	1	1	1	1	1	1	1
14:47:41.770	1	1	1	1	1	1	1	1	1	1	1	1	1	1	1	1	1	1	1
14:47:42.720	1	1	1	1	1	1	1	1	1	1	1	1	1	1	1	1	1	1	1
14:47:43.670	1	1	1	1	1	1	1	1	1	1	1	1	1	1	1	1	1	1	1
14:47:44.707	1	1	1	1	1	1	1	1	1	1	1	1	1	1	1	1	1	1	1
14:47:45.658	1	1	1	1	1	1	1	1	1	1	1	1	1	1	1	1	1	1	1
14:47:46.608	1	1	1	1	1	1	1	1	1	1	1	1	1	1	1	1	1	1	1
14:47:47.645	1	1	1	1	1	1	1	1	1	1	1	1	1	1	1	1	1	1	1
14:47:48.595	1	1	1	1	1	1	1	1	1	1	1	1	1	1	1	1	1	1	1
14:47:49.546	1	1	1	1	1	1	1	1	1	1	1	1	1	1	1	1	1	1	1
14:47:50.496	1	1	1	1	1	1	1	1	1	1	1	1	1	1	1	1	1	1	1
14:47:51.533	1	1	1	1	1	1	1	1	1	1	1	1	1	1	1	1	1	1	1
14:47:52.483	1	1	1	1	1	1	1	1	1	1	1	1	1	1	1	1	1	1	1
14:47:53.434	1	1	1	1	1	1	1	1	1	1	1	1	1	1	1	1	1	1	1
14:47:54.470	1	1	1	1	1	1	1	1	1	1	1	1	1	1	1	1	1	1	1
14:47:55.421	1	1	1	1	1	1	1	1	1	1	1	1	1	1	1	1	1	1	1
14:47:56.371	1	1	1	1	1	1	1	1	1	1	1	1	1	1	1	1	1	1	1
14:47:57.408	1	1	1	1	1	1	1	1	1	1	1	1	1	1	1	1	1	1	1
14:47:58.358	1	1	1	1	1	1	1	1	1	1	1	1	1	1	1	1	1	1	1
14:47:59.309	1	1	1	1	1	1	1	1	1	1	1	1	1	1	1	1	1	1	1
14:48:00.346	1	1	1	1	1	1	1	1	1	1	1	1	1	1	1	1	1	1	1
14:49:15.859	1	1	1	1	1	1	1	1	1	1	1	1	1	1	1	1	1	1	1
14:49:16.810	1	1	1	1	1	1	1	1	1	1	1	1	1	1	1	1	1	1	1
14:49:17.760	1	1	1	1	1	1	1	1	1	1	1	1	1	1	1	1	1	1	1
14:49:18.710	1	1	1	1	1	1	1	1	1	1	1	1	1	1	1	1	1	1	1
14:49:19.747	1	1	1	1	1	1	1	1	1	1	1	1	1	1	1	1	1	1	1
14:49:20.698	1	1	1	1	1	1	1	1	1	1	1	1	1	1	1	1	1	1	1
14:49:21.648	1	1	1	1	1	1	1	1	1	1	1	1	1	1	1	1	1	1	1
14:49:22.685	1	1	1	1	1	1	1	1	1	1	1	1	1	1	1	1	1	1	1
14:49:23.635	1	1	1	1	1	1	1	1	1	1	1	1	1	1	1	1	1	1	1
14:49:24.586	1	1	1	1	1	1	1	1	1	1	1	1	1	1	1	1	1	1	1
14:49:25.622	1	1	1	1	1	1	1	1	1	1	1	1	1	1	1	1	1	1	1
14:49:26.573	1	1	1	1	1	1	1	1	1	1	1	1	1	1	1	1	1	1	1
14:49:27.523	1	1	1	1	1	1	1	1	1	1	1	1	1	1	1	1	1	1	1
14:49:28.474	1	1	1	1	1	1	1	1	1	1	1	1	1	1	1	1	1	1	1
14:49:29.510	1	1	1	1	1	1	1	1	1	1	1	1	1	1	1	1	1	1	1
14:49:30.461	1	1	1	1	1	1	1	1	1	1	1	1	1	1	1	1	1	1	1
14:49:31.411	1	1	1	1	1	1	1	1	1	1	1	1	1	1	1	1	1	1	1
14:49:32.448	1	1	1	1	1	1	1	1	1	1	1	1	1	1	1	1	1	1	1
14:49:33.398	1	1	1	1	1	1	1	1	1	1	1	1	1	1	1	1	1	1	1
14:49:34.349	1	1	1	1	1	1	1	1	1	1	1	1	1	1	1	1	1	1	1
14:49:35.386	1	1	1	1	1	1	1	1	1	1	1	1	1	1	1	1	1	1	1
14:49:36.336	1	1	1	1	1	1	1	1	1	1	1	1	1	1	1	1	1	1	1
14:49:37.286	1	1	1	1	1	1	1	1	1	1	1	1	1	1	1	1	1	1	1
14:49:38.237	1	1	1	1	1	1	1	1	1	1	1	1	1	1	1	1	1	1	1
14:49:39.274	1	1	1	1	1	1	1	1	1	1	1	1	1	1	1	1	1	1	1
14:49:40.224	1	1	1	1	1	1	1	1	1	1	1	1	1	1	1	1	1	1	1
14:49:41.174	1	1	1	1	1	1	1	1	1	1	1	1	1	1	1	1	1	1	1
14:49:42.211	1	1	1	1	1	1	1	1	1	1	1	1	1	1	1	1	1	1	1
14:49:43.162	1	1	1	1	1	1	1	1	1	1	1	1	1	1	1	1	1	1	1
14:49:44.112	1	1	1	1	1	1	1	1	1	1	1	1	1	1	1	1	1	1	1
14:49:45.149	1	1	1	1	1	1	1	1	1	1	1	1	1	1	1	1	1	1	1
14:49:46.099	1	1	1	1	1	1	1	1	1	1	1	1	1	1	1	1	1	1	1
14:49:47.050	1	1	1	1	1	1	1	1	1	1	1	1	1	1	1	1	1	1	1
14:49:48.086	1	1	1	1	1	1	1	1	1	1	1	1	1	1	1	1	1	1	1
14:49:49.037	1	1	1	1	1	1	1	1	1	1	1	1	1	1	1	1	1	1	1
14:49:49.987	1	1	1	1	1	1	1	1	1	1	1	1	1	1	1	1	1	1	1
14:49:50.938	1	1	1	1	1	1	1	1	1	1	1	1	1	1	1	1	1	1	1
14:49:51.974	1	1	1	1	1	1	1	1	1	1	1	1	1	1	1	1	1	1	1
14:49:52.925	1	1	1	1	1	1	1	1	1	1	1	1	1	1	1	1	1	1	1
14:49:53.875	1	1	1	1	1	1	1	1	1	1	1	1	1	1	1	1	1	1	1
14:49:54.912	1	1	1	1	1	1	1	1	1	1	1	1	1	1	1	1	1	1	1
14:49:55.862	1	1	1	1	1	1	1	1	1	1	1	1	1	1	1	1	1	1	1
14:49:56.813	1	1	1	1	1	1	1	1	1	1	1	1	1	1	1	1	1	1	1
14:49:57.850	1	1	1	1	1	1	1	1	1	1	1	1	1	1	1	1	1	1	1
14:49:58.800	1	1	1	1	1	1	1	1	1	1	1	1	1	1	1	1	1	1	1
14:49:59.750	1	1	1	1	1	1	1	1	1	1	1	1	1	1	1	1	1	1	1
14:50:00.787	1	1	1	1	1	1	1	1	1	1	1	1	1	1	1	1	1	1	1
14:51:15.869	1	1	1	1	1	1	1	1	1	1	1	1	1	1	1	1	1	1	1
14:51:16.819	1	1	1	1	1	1	1	1	1	1	1	1	1	1	1	1	1	1	1
14:51:17.770	1	1	1	1	1	1	1	1	1	1	1	1	1	1	1	1	1	1	1
14:51:18.806	1	1	1	1	1	1	1	1	1	1	1	1	1	1	1	1	1	1	1
14:51:19.757	1	1	1	1	1	1	1	1	1	1	1	1	1	1	1	1	1	1	1
14:51:20.707	1	1	1	1	1	1	1	1	1	1	1	1	1	1	1	1	1	1	1
14:51:21.658	1	1	1	1	1	1	1	1	1	1	1	1	1	1	1	1	1	1	1
14:51:22.694	1	1	1	1	1	1	1	1	1	1	1	1	1	1	1	1	1	1	1
14:51:23.645	1	1	1	1	1	1	1	1	1	1	1	1	1	1	1	1	1	1	1
14:51:24.595	1	1	1	1	1	1	1	1	1	1	1	1	1	1	1	1	1	1	1
14:51:25.632	1	1	1	1	1	1	1	1	1	1	1	1	1	1	1	1	1	1	1
14:51:26.582	1	1	1	1	1	1	1	1	1	1	1	1	1	1	1	1	1	1	1
14:51:27.533	1	1	1	1	1	1	1	1	1	1	1	1	1	1	1	1	1	1	1
14:51:28.483	1	1	1	1	1	1	1	1	1	1	1	1	1	1	1	1	1	1	1
14:51:29.520	1	1	1	1	1	1	1	1	1	1	1	1	1	1	1	1	1	1	1
14:51:30.470	1	1	1	1	1	1	1	1	1	1	1	1	1	1	1	1	1	1	1
14:51:31.421	1	1	1	1	1	1	1	1	1	1	1	1	1	1	1	1	1	1	1
14:51:32.458	1	1	1	1	1	1	1	1	1	1	1	1	1	1	1	1	1	1	1
14:51:33.408	1	1	1	1	1	1	1	1	1	1	1	1	1	1	1	1	1	1	1
14:51:34.358	1	1	1	1	1	1	1	1	1	1	1	1	1	1	1	1	1	1	1
14:51:35.395	1	1	1	1	1	1	1	1	1	1	1	1	1	1	1	1	1	1	1
14:51:36.346	1	1	1	1	1	1	1	1	1	1	1	1	1	1	1	1	1	1	1
14:51:37.296	1	1	1	1	1	1	1	1	1	1	1	1	1	1	1	1	1	1	1
14:51:38.333	1	1	1	1	1	1	1	1	1	1	1	1	1	1	1	1	1	1	1
14:51:39.283	1	1	1	1	1	1	1	1	1	1	1	1	1	1	1	1	1	1	1
14:51:40.234	1	1	1	1	1	1	1	1	1	1	1	1	1	1	1	1	1	1	1
14:51:41.184	1	1	1	1	1	1	1	1	1	1	1	1	1	1	1	1	1	1	1
14:51:42.221	1	1	1	1	1	1	1	1	1	1	1	1	1	1	1	1	1	1	1
14:51:43.171	1	1	1	1	1	1	1	1	1	1	1	1	1	1	1	1	1	1	1
14:51:44.122	1	1	1	1	1	1	1	1	1	1	1	1	1	1	1	1	1	1	1
14:51:45.158	1	1	1	1	1	1	1	1	1	1	1	1	1	1	1	1	1	1	1
14:51:46.109	1	1	1	1	1	1	1	1	1	1	1	1	1	1	1	1	1	1	1
14:51:47.059	1	1	1	1	1	1	1	1	1	1	1	1	1	1	1	1	1	1	1
14:51:48.096	1	1	1	1	1	1	1	1	1	1	1	1	1	1	1	1	1	1	1
14:51:49.046	1	1	1	1	1	1	1	1	1	1	1	1	1	1	1	1	1	1	1
14:51:49.997	1	1	1	1	1	1	1	1	1	1	1	1	1	1	1	1	1	1	1
14:51:50.947	1	1	1	1	1	1	1	1	1	1	1	1	1	1	1	1	1	1	1
14:51:51.984	1	1	1	1	1	1	1	1	1	1	1	1	1	1	1	1	1	1	1
14:51:52.934	1	1	1	1	1	1	1	1	1	1	1	1	1	1	1	1	1	1	1
14:51:53.885	1	1	1	1	1	1	1	1	1	1	1	1	1	1	1	1	1	1	1
14:51:54.922	1	1	1	1	1	1	1	1	1	1	1	1	1	1	1	1	1	1	1
14:51:55.872	1	1	1	1	1	1	1	1	1	1	1	1	1	1	1	1	1	1	1
14:51:56.822	1	1	1	1	1	1	1	1	1	1	1	1	1	1	1	1	1	1	1
14:51:57.859	1	1	1	1	1	1	1	1	1	1	1	1	1	1	1	1	1	1	1
14:51:58.810	1	1	1	1	1	1	1	1	1	1	1	1	1	1	1	1	1	1	1
14:51:59.760	1	1	1	1	1	1	1	1	1	1	1	1	1	1	1	1	1	1	1
14:53:15.187	1	1	1	1	1	1	1	1	1	1	1	1	1	1	1	1	1	1	1
14:53:16.138	1	1	1	1	1	1	1	1	1	1	1	1	1	1	1	1	1	1	1
14:53:17.174	1	1	1	1	1	1	1	1	1	1	1	1	1	1	1	1	1	1	1
14:53:18.125	1	1	1	1	1	1	1	1	1	1	1	1	1	1	1	1	1	1	1
14:53:19.075	1	1	1	1	1	1	1	1	1	1	1	1	1	1	1	1	1	1	1
14:53:20.112	1	1	1	1	1	1	1	1	1	1	1	1	1	1	1	1	1	1	1
14:53:21.062	1	1	1	1	1	1	1	1	1	1	1	1	1	1	1	1	1	1	1
14:53:22.013	1	1	1	1	1	1	1	1	1	1	1	1	1	1	1	1	1	1	1
14:53:23.050	1	1	1	1	1	1	1	1	1	1	1	1	1	1	1	1	1	1	1
14:53:24.000	1	1	1	1	1	1	1	1	1	1	1	1	1	1	1	1	1	1	1
14:53:24.950	1	1	1	1	1	1	1	1	1	1	1	1	1	1	1	1	1	1	1
14:53:25.901	1	1	1	1	1	1	1	1	1	1	1	1	1	1	1	1	1	1	1
14:53:26.938	1	1	1	1	1	1	1	1	1	1	1	1	1	1	1	1	1	1	1
14:53:27.888	1	1	1	1	1	1	1	1	1	1	1	1	1	1	1	1	1	1	1
14:53:28.925	1	1	1	1	1	1	1	1	1	1	1	1	1	1	1	1	1	1	1
14:53:29.875	1	1	1	1	1	1	1	1	1	1	1	1	1	1	1	1	1	1	1
14:53:30.826	1	1	1	1	1	1	1	1	1	1	1	1	1	1	1	1	1	1	1
14:53:31.776	1	1	1	1	1	1	1	1	1	1	1	1	1	1	1	1	1	1	1
14:53:32.813	1	1	1	1	1	1	1	1	1	1	1	1	1	1	1	1	1	1	1
14:53:33.763	1	1	1	1	1	1	1	1	1	1	1	1	1	1	1	1	1	1	1
14:53:34.714	1	1	1	1	1	1	1	1	1	1	1	1	1	1	1	1	1	1	1
14:53:35.750	1	1	1	1	1	1	1	1	1	1	1	1	1	1	1	1	1	1	1
14:53:36.701	1	1	1	1	1	1	1	1	1	1	1	1	1	1	1	1	1	1	1
14:53:37.651	1	1	1	1	1	1	1	1	1	1	1	1	1	1	1	1	1	1	1
14:53:38.688	1	1	1	1	1	1	1	1	1	1	1	1	1	1	1	1	1	1	1
14:53:39.638	1	1	1	1	1	1	1	1	1	1	1	1	1	1	1	1	1	1	1
14:53:40.589	1	1	1	1	1	1	1	1	1	1	1	1	1	1	1	1	1	1	1
14:53:41.539	1	1	1	1	1	1	1	1	1	1	1	1	1	1	1	1	1	1	1
14:53:42.576	1	1	1	1	1	1	1	1	1	1	1	1	1	1	1	1	1	1	1
14:53:43.526	1	1	1	1	1	1	1	1	1	1	1	1	1	1	1	1	1	1	1
14:53:44.477	1	1	1	1	1	1	1	1	1	1	1	1	1	1	1	1	1	1	1
14:53:45.514	1	1	1	1	1	1	1	1	1	1	1	1	1	1	1	1	1	1	1
14:53:46.464	1	1	1	1	1	1	1	1	1	1	1	1	1	1	1	1	1	1	1
14:53:47.414	1	1	1	1	1	1	1	1	1	1	1	1	1	1	1	1	1	1	1
14:53:48.451	1	1	1	1	1	1	1	1	1	1	1	1	1	1	1	1	1	1	1
14:53:49.402	1	1	1	1	1	1	1	1	1	1	1	1	1	1	1	1	1	1	1
14:53:50.352	1	1	1	1	1	1	1	1	1	1	1	1	1	1	1	1	1	1	1
14:53:51.302	1	1	1	1	1	1	1	1	1	1	1	1	1	1	1	1	1	1	1
14:53:52.339	1	1	1	1	1	1	1	1	1	1	1	1	1	1	1	1	1	1	1
14:53:53.290	1	1	1	1	1	1	1	1	1	1	1	1	1	1	1	1	1	1	1
14:53:54.240	1	1	1	1	1	1	1	1	1	1	1	1	1	1	1	1	1	1	1
14:53:55.277	1	1	1	1	1	1	1	1	1	1	1	1	1	1	1	1	1	1	1
14:53:56.227	1	1	1	1	1	1	1	1	1	1	1	1	1	1	1	1	1	1	1
14:53:57.178	1	1	1	1	1	1	1	1	1	1	1	1	1	1	1	1	1	1	1
14:53:58.214	1	1	1	1	1	1	1	1	1	1	1	1	1	1	1	1	1	1	1
14:53:59.165	1	1	1	1	1	1	1	1	1	1	1	1	1	1	1	1	1	1	1
14:54:00.115	1	1	1	1	1	1	1	1	1	1	1	1	1	1	1	1	1	1	1
14:55:15.802	1	1	1	1	1	1	1	1	1	1	1	1	1	1	1	1	1	1	1
14:55:16.752	1	1	1	1	1	1	1	1	1	1	1	1	1	1	1	1	1	1	1
14:55:17.702	1	1	1	1	1	1	1	1	1	1	1	1	1	1	1	1	1	1	1
14:55:18.739	1	1	1	1	1	1	1	1	1	1	1	1	1	1	1	1	1	1	1
14:55:19.690	1	1	1	1	1	1	1	1	1	1	1	1	1	1	1	1	1	1	1
14:55:20.640	1	1	1	1	1	1	1	1	1	1	1	1	1	1	1	1	1	1	1
14:55:21.677	1	1	1	1	1	1	1	1	1	1	1	1	1	1	1	1	1	1	1
14:55:22.627	1	1	1	1	1	1	1	1	1	1	1	1	1	1	1	1	1	1	1
14:55:23.578	1	1	1	1	1	1	1	1	1	1	1	1	1	1	1	1	1	1	1
14:55:24.614	1	1	1	1	1	1	1	1	1	1	1	1	1	1	1	1	1	1	1
14:55:25.565	1	1	1	1	1	1	1	1	1	1	1	1	1	1	1	1	1	1	1
14:55:26.515	1	1	1	1	1	1	1	1	1	1	1	1	1	1	1	1	1	1	1
14:55:27.552	1	1	1	1	1	1	1	1	1	1	1	1	1	1	1	1	1	1	1
14:55:28.502	1	1	1	1	1	1	1	1	1	1	1	1	1	1	1	1	1	1	1
14:55:29.453	1	1	1	1	1	1	1	1	1	1	1	1	1	1	1	1	1	1	1
14:55:30.490	1	1	1	1	1	1	1	1	1	1	1	1	1	1	1	1	1	1	1
14:55:31.440	1	1	1	1	1	1	1	1	1	1	1	1	1	1	1	1	1	1	1
14:55:32.390	1	1	1	1	1	1	1	1	1	1	1	1	1	1	1	1	1	1	1
14:55:33.341	1	1	1	1	1	1	1	1	1	1	1	1	1	1	1	1	1	1	1
14:55:34.378	1	1	1	1	1	1	1	1	1	1	1	1	1	1	1	1	1	1	1
14:55:35.328	1	1	1	1	1	1	1	1	1	1	1	1	1	1	1	1	1	1	1
14:55:36.278	1	1	1	1	1	1	1	1	1	1	1	1	1	1	1	1	1	1	1
14:55:37.315	1	1	1	1	1	1	1	1	1	1	1	1	1	1	1	1	1	1	1
14:55:38.266	1	1	1	1	1	1	1	1	1	1	1	1	1	1	1	1	1	1	1
14:55:39.216	1	1	1	1	1	1	1	1	1	1	1	1	1	1	1	1	1	1	1
14:55:40.166	1	1	1	1	1	1	1	1	1	1	1	1	1	1	1	1	1	1	1
14:55:41.203	1	1	1	1	1	1	1	1	1	1	1	1	1	1	1	1	1	1	1
14:55:42.154	1	1	1	1	1	1	1	1	1	1	1	1	1	1	1	1	1	1	1
14:55:43.104	1	1	1	1	1	1	1	1	1	1	1	1	1	1	1	1	1	1	1
14:55:44.141	1	1	1	1	1	1	1	1	1	1	1	1	1	1	1	1	1	1	1
14:55:45.091	1	1	1	1	1	1	1	1	1	1	1	1	1	1	1	1	1	1	1
14:55:46.042	1	1	1	1	1	1	1	1	1	1	1	1	1	1	1	1	1	1	1
14:55:47.078	1	1	1	1	1	1	1	1	1	1	1	1	1	1	1	1	1	1	1
14:55:48.029	1	1	1	1	1	1	1	1	1	1	1	1	1	1	1	1	1	1	1
14:55:48.979	1	1	1	1	1	1	1	1	1	1	1	1	1	1	1	1	1	1	1
14:55:50.016	1	1	1	1	1	1	1	1	1	1	1	1	1	1	1	1	1	1	1
14:55:50.966	1	1	1	1	1	1	1	1	1	1	1	1	1	1	1	1	1	1	1
14:55:51.917	1	1	1	1	1	1	1	1	1	1	1	1	1	1	1	1	1	1	1
14:55:52.867	1	1	1	1	1	1	1	1	1	1	1	1	1	1	1	1	1	1	1
14:55:53.904	1	1	1	1	1	1	1	1	1	1	1	1	1	1	1	1	1	1	1
14:55:54.854	1	1	1	1	1	1	1	1	1	1	1	1	1	1	1	1	1	1	1
14:55:55.805	1	1	1	1	1	1	1	1	1	1	1	1	1	1	1	1	1	1	1
14:55:56.842	1	1	1	1	1	1	1	1	1	1	1	1	1	1	1	1	1	1	1
14:55:57.792	1	1	1	1	1	1	1	1	1	1	1	1	1	1	1	1	1	1	1
14:55:58.742	1	1	1	1	1	1	1	1	1	1	1	1	1	1	1	1	1	1	1
14:55:59.779	1	1	1	1	1	1	1	1	1	1	1	1	1	1	1	1	1	1	1
14:57:15.206	1	1	1	1	1	1	1	1	1	1	1	1	1	1	1	1	1	1	1
14:57:16.157	1	1	1	1	1	1	1	1	1	1	1	1	1	1	1	1	1	1	1
14:57:17.194	1	1	1	1	1	1	1	1	1	1	1	1	1	1	1	1	1	1	1
14:57:18.144	1	1	1	1	1	1	1	1	1	1	1	1	1	1	1	1	1	1	1
14:57:19.094	1	1	1	1	1	1	1	1	1	1	1	1	1	1	1	1	1	1	1
14:57:20.131	1	1	1	1	1	1	1	1	1	1	1	1	1	1	1	1	1	1	1
14:57:21.082	1	1	1	1	1	1	1	1	1	1	1	1	1	1	1	1	1	1	1
14:57:22.032	1	1	1	1	1	1	1	1	1	1	1	1	1	1	1	1	1	1	1
14:57:23.069	1	1	1	1	1	1	1	1	1	1	1	1	1	1	1	1	1	1	1
14:57:24.019	1	1	1	1	1	1	1	1	1	1	1	1	1	1	1	1	1	1	1
14:57:24.970	1	1	1	1	1	1	1	1	1	1	1	1	1	1	1	1	1	1	1
14:57:25.920	1	1	1	1	1	1	1	1	1	1	1	1	1	1	1	1	1	1	1
14:57:26.957	1	1	1	1	1	1	1	1	1	1	1	1	1	1	1	1	1	1	1
14:57:27.907	1	1	1	1	1	1	1	1	1	1	1	1	1	1	1	1	1	1	1
14:57:28.858	1	1	1	1	1	1	1	1	1	1	1	1	1	1	1	1	1	1	1
14:57:29.894	1	1	1	1	1	1	1	1	1	1	1	1	1	1	1	1	1	1	1
14:57:30.845	1	1	1	1	1	1	1	1	1	1	1	1	1	1	1	1	1	1	1
14:57:31.795	1	1	1	1	1	1	1	1	1	1	1	1	1	1	1	1	1	1	1
14:57:32.832	1	1	1	1	1	1	1	1	1	1	1	1	1	1	1	1	1	1	1
14:57:33.782	1	1	1	1	1	1	1	1	1	1	1	1	1	1	1	1	1	1	1
14:57:34.733	1	1	1	1	1	1	1	1	1	1	1	1	1	1	1	1	1	1	1
14:57:35.683	1	1	1	1	1	1	1	1	1	1	1	1	1	1	1	1	1	1	1
14:57:36.720	1	1	1	1	1	1	1	1	1	1	1	1	1	1	1	1	1	1	1
14:57:37.670	1	1	1	1	1	1	1	1	1	1	1	1	1	1	1	1	1	1	1
14:57:38.621	1	1	1	1	1	1	1	1	1	1	1	1	1	1	1	1	1	1	1
14:57:39.658	1	1	1	1	1	1	1	1	1	1	1	1	1	1	1	1	1	1	1
14:57:40.608	1	1	1	1	1	1	1	1	1	1	1	1	1	1	1	1	1	1	1
14:57:41.558	1	1	1	1	1	1	1	1	1	1	1	1	1	1	1	1	1	1	1
14:57:42.595	1	1	1	1	1	1	1	1	1	1	1	1	1	1	1	1	1	1	1
14:57:43.546	1	1	1	1	1	1	1	1	1	1	1	1	1	1	1	1	1	1	1
14:57:44.496	1	1	1	1	1	1	1	1	1	1	1	1	1	1	1	1	1	1	1
14:57:45.446	1	1	1	1	1	1	1	1	1	1	1	1	1	1	1	1	1	1	1
14:57:46.483	1	1	1	1	1	1	1	1	1	1	1	1	1	1	1	1	1	1	1
14:57:47.434	1	1	1	1	1	1	1	1	1	1	1	1	1	1	1	1	1	1	1
14:57:48.470	1	1	1	1	1	1	1	1	1	1	1	1	1	1	1	1	1	1	1
14:57:49.421	1	1	1	1	1	1	1	1	1	1	1	1	1	1	1	1	1	1	1
14:57:50.371	1	1	1	1	1	1	1	1	1	1	1	1	1	1	1	1	1	1	1
14:57:51.322	1	1	1	1	1	1	1	1	1	1	1	1	1	1	1	1	1	1	1
14:57:52.358	1	1	1	1	1	1	1	1	1	1	1	1	1	1	1	1	1	1	1
14:57:53.309	1	1	1	1	1	1	1	1	1	1	1	1	1	1	1	1	1	1	1
14:57:54.259	1	1	1	1	1	1	1	1	1	1	1	1	1	1	1	1	1	1	1
14:57:55.296	1	1	1	1	1	1	1	1	1	1	1	1	1	1	1	1	1	1	1
14:57:56.246	1	1	1	1	1	1	1	1	1	1	1	1	1	1	1	1	1	1	1
14:57:57.197	1	1	1	1	1	1	1	1	1	1	1	1	1	1	1	1	1	1	1
14:57:58.147	1	1	1	1	1	1	1	1	1	1	1	1	1	1	1	1	1	1	1
14:57:59.184	1	1	1	1	1	1	1	1	1	1	1	1	1	1	1	1	1	1	1
14:58:00.134	1	1	1	1	1	1	1	1	1	1	1	1	1	1	1	1	1	1	1
14:59:15.994	1	1	1	1	1	1	1	1	1	1	1	1	1	1	1	1	1	1	1
14:59:17.030	1	1	1	1	1	1	1	1	1	1	1	1	1	1	1	1	1	1	1
14:59:17.981	1	1	1	1	1	1	1	1	1	1	1	1	1	1	1	1	1	1	1
14:59:18.931	1	1	1	1	1	1	1	1	1	1	1	1	1	1	1	1	1	1	1
14:59:19.968	1	1	1	1	1	1	1	1	1	1	1	1	1	1	1	1	1	1	1
14:59:20.918	1	1	1	1	1	1	1	1	1	1	1	1	1	1	1	1	1	1	1
14:59:21.869	1	1	1	1	1	1	1	1	1	1	1	1	1	1	1	1	1	1	1
14:59:22.906	1	1	1	1	1	1	1	1	1	1	1	1	1	1	1	1	1	1	1
14:59:23.856	1	1	1	1	1	1	1	1	1	1	1	1	1	1	1	1	1	1	1
14:59:24.806	1	1	1	1	1	1	1	1	1	1	1	1	1	1	1	1	1	1	1
14:59:25.757	1	1	1	1	1	1	1	1	1	1	1	1	1	1	1	1	1	1	1
14:59:26.794	1	1	1	1	1	1	1	1	1	1	1	1	1	1	1	1	1	1	1
14:59:27.744	1	1	1	1	1	1	1	1	1	1	1	1	1	1	1	1	1	1	1
14:59:28.694	1	1	1	1	1	1	1	1	1	1	1	1	1	1	1	1	1	1	1
14:59:29.731	1	1	1	1	1	1	1	1	1	1	1	1	1	1	1	1	1	1	1
14:59:30.682	1	1	1	1	1	1	1	1	1	1	1	1	1	1	1	1	1	1	1
14:59:31.632	1	1	1	1	1	1	1	1	1	1	1	1	1	1	1	1	1	1	1
14:59:32.582	1	1	1	1	1	1	1	1	1	1	1	1	1	1	1	1	1	1	1
14:59:33.619	1	1	1	1	1	1	1	1	1	1	1	1	1	1	1	1	1	1	1
14:59:34.570	1	1	1	1	1	1	1	1	1	1	1	1	1	1	1	1	1	1	1
14:59:35.520	1	1	1	1	1	1	1	1	1	1	1	1	1	1	1	1	1	1	1
14:59:36.557	1	1	1	1	1	1	1	1	1	1	1	1	1	1	1	1	1	1	1
14:59:37.507	1	1	1	1	1	1	1	1	1	1	1	1	1	1	1	1	1	1	1
14:59:38.458	1	1	1	1	1	1	1	1	1	1	1	1	1	1	1	1	1	1	1
14:59:39.494	1	1	1	1	1	1	1	1	1	1	1	1	1	1	1	1	1	1	1
14:59:40.445	1	1	1	1	1	1	1	1	1	1	1	1	1	1	1	1	1	1	1
14:59:41.395	1	1	1	1	1	1	1	1	1	1	1	1	1	1	1	1	1	1	1
14:59:42.346	1	1	1	1	1	1	1	1	1	1	1	1	1	1	1	1	1	1	1
14:59:43.382	1	1	1	1	1	1	1	1	1	1	1	1	1	1	1	1	1	1	1
14:59:44.333	1	1	1	1	1	1	1	1	1	1	1	1	1	1	1	1	1	1	1
14:59:45.370	1	1	1	1	1	1	1	1	1	1	1	1	1	1	1	1	1	1	1
14:59:46.320	1	1	1	1	1	1	1	1	1	1	1	1	1	1	1	1	1	1	1
14:59:47.270	1	1	1	1	1	1	1	1	1	1	1	1	1	1	1	1	1	1	1
14:59:48.221	1	1	1	1	1	1	1	1	1	1	1	1	1	1	1	1	1	1	1
14:59:49.258	1	1	1	1	1	1	1	1	1	1	1	1	1	1	1	1	1	1	1
14:59:50.208	1	1	1	1	1	1	1	1	1	1	1	1	1	1	1	1	1	1	1
14:59:51.158	1	1	1	1	1	1	1	1	1	1	1	1	1	1	1	1	1	1	1
14:59:52.195	1	1	1	1	1	1	1	1	1	1	1	1	1	1	1	1	1	1	1
14:59:53.146	1	1	1	1	1	1	1	1	1	1	1	1	1	1	1	1	1	1	1
14:59:54.096	1	1	1	1	1	1	1	1	1	1	1	1	1	1	1	1	1	1	1
14:59:55.046	1	1	1	1	1	1	1	1	1	1	1	1	1	1	1	1	1	1	1
14:59:56.083	1	1	1	1	1	1	1	1	1	1	1	1	1	1	1	1	1	1	1
14:59:57.034	1	1	1	1	1	1	1	1	1	1	1	1	1	1	1	1	1	1	1
14:59:57.984	1	1	1	1	1	1	1	1	1	1	1	1	1	1	1	1	1	1	1
14:59:59.021	1	1	1	1	1	1	1	1	1	1	1	1	1	1	1	1	1	1	1
14:59:59.971	1	1	1	1	1	1	1	1	1	1	1	1	1	1	1	1	1	1	1
15:01:15.398	1	1	1	1	1	1	1	1	1	1	1	1	1	1	1	1	1	1	1
15:01:16.435	1	1	1	1	1	1	1	1	1	1	1	1	1	1	1	1	1	1	1
15:01:17.386	1	1	1	1	1	1	1	1	1	1	1	1	1	1	1	1	1	1	1
15:01:18.336	1	1	1	1	1	1	1	1	1	1	1	1	1	1	1	1	1	1	1
15:01:19.373	1	1	1	1	1	1	1	1	1	1	1	1	1	1	1	1	1	1	1
15:01:20.323	1	1	1	1	1	1	1	1	1	1	1	1	1	1	1	1	1	1	1
15:01:21.274	1	1	1	1	1	1	1	1	1	1	1	1	1	1	1	1	1	1	1
15:01:22.310	1	1	1	1	1	1	1	1	1	1	1	1	1	1	1	1	1	1	1
15:01:23.261	1	1	1	1	1	1	1	1	1	1	1	1	1	1	1	1	1	1	1
15:01:24.211	1	1	1	1	1	1	1	1	1	1	1	1	1	1	1	1	1	1	1
15:01:25.248	1	1	1	1	1	1	1	1	1	1	1	1	1	1	1	1	1	1	1
15:01:26.198	1	1	1	1	1	1	1	1	1	1	1	1	1	1	1	1	1	1	1
15:01:27.149	1	1	1	1	1	1	1	1	1	1	1	1	1	1	1	1	1	1	1
15:01:28.099	1	1	1	1	1	1	1	1	1	1	1	1	1	1	1	1	1	1	1
15:01:29.136	1	1	1	1	1	1	1	1	1	1	1	1	1	1	1	1	1	1	1
15:01:30.086	1	1	1	1	1	1	1	1	1	1	1	1	1	1	1	1	1	1	1
15:01:31.037	1	1	1	1	1	1	1	1	1	1	1	1	1	1	1	1	1	1	1
15:01:32.074	1	1	1	1	1	1	1	1	1	1	1	1	1	1	1	1	1	1	1
15:01:33.024	1	1	1	1	1	1	1	1	1	1	1	1	1	1	1	1	1	1	1
15:01:33.974	1	1	1	1	1	1	1	1	1	1	1	1	1	1	1	1	1	1	1
15:01:35.011	1	1	1	1	1	1	1	1	1	1	1	1	1	1	1	1	1	1	1
15:01:35.962	1	1	1	1	1	1	1	1	1	1	1	1	1	1	1	1	1	1	1
15:01:36.912	1	1	1	1	1	1	1	1	1	1	1	1	1	1	1	1	1	1	1
15:01:37.862	1	1	1	1	1	1	1	1	1	1	1	1	1	1	1	1	1	1	1
15:01:38.899	1	1	1	1	1	1	1	1	1	1	1	1	1	1	1	1	1	1	1
15:01:39.850	1	1	1	1	1	1	1	1	1	1	1	1	1	1	1	1	1	1	1
15:01:40.800	1	1	1	1	1	1	1	1	1	1	1	1	1	1	1	1	1	1	1
15:01:41.837	1	1	1	1	1	1	1	1	1	1	1	1	1	1	1	1	1	1	1
15:01:42.787	1	1	1	1	1	1	1	1	1	1	1	1	1	1	1	1	1	1	1
15:01:43.738	1	1	1	1	1	1	1	1	1	1	1	1	1	1	1	1	1	1	1
15:01:44.774	1	1	1	1	1	1	1	1	1	1	1	1	1	1	1	1	1	1	1
15:01:45.725	1	1	1	1	1	1	1	1	1	1	1	1	1	1	1	1	1	1	1
15:01:46.675	1	1	1	1	1	1	1	1	1	1	1	1	1	1	1	1	1	1	1
15:01:47.626	1	1	1	1	1	1	1	1	1	1	1	1	1	1	1	1	1	1	1
15:01:48.662	1	1	1	1	1	1	1	1	1	1	1	1	1	1	1	1	1	1	1
15:01:49.613	1	1	1	1	1	1	1	1	1	1	1	1	1	1	1	1	1	1	1
15:01:50.563	1	1	1	1	1	1	1	1	1	1	1	1	1	1	1	1	1	1	1
15:01:51.600	1	1	1	1	1	1	1	1	1	1	1	1	1	1	1	1	1	1	1
15:01:52.550	1	1	1	1	1	1	1	1	1	1	1	1	1	1	1	1	1	1	1
15:01:53.501	1	1	1	1	1	1	1	1	1	1	1	1	1	1	1	1	1	1	1
15:01:54.538	1	1	1	1	1	1	1	1	1	1	1	1	1	1	1	1	1	1	1
15:01:55.488	1	1	1	1	1	1	1	1	1	1	1	1	1	1	1	1	1	1	1
15:01:56.438	1	1	1	1	1	1	1	1	1	1	1	1	1	1	1	1	1	1	1
15:01:57.389	1	1	1	1	1	1	1	1	1	1	1	1	1	1	1	1	1	1	1
15:01:58.426	1	1	1	1	1	1	1	1	1	1	1	1	1	1	1	1	1	1	1
15:01:59.376	1	1	1	1	1	1	1	1	1	1	1	1	1	1	1	1	1	1	1
15:02:00.326	1	1	1	1	1	1	1	1	1	1	1	1	1	1	1	1	1	1	1
15:03:16.013	1	1	1	1	1	1	1	1	1	1	1	1	1	1	1	1	1	1	1
15:03:17.050	1	1	1	1	1	1	1	1	1	1	1	1	1	1	1	1	1	1	1
15:03:18.000	1	1	1	1	1	1	1	1	1	1	1	1	1	1	1	1	1	1	1
15:03:18.950	1	1	1	1	1	1	1	1	1	1	1	1	1	1	1	1	1	1	1
15:03:19.987	1	1	1	1	1	1	1	1	1	1	1	1	1	1	1	1	1	1	1
15:03:20.938	1	1	1	1	1	1	1	1	1	1	1	1	1	1	1	1	1	1	1
15:03:21.888	1	1	1	1	1	1	1	1	1	1	1	1	1	1	1	1	1	1	1
15:03:22.838	1	1	1	1	1	1	1	1	1	1	1	1	1	1	1	1	1	1	1
15:03:23.875	1	1	1	1	1	1	1	1	1	1	1	1	1	1	1	1	1	1	1
15:03:24.826	1	1	1	1	1	1	1	1	1	1	1	1	1	1	1	1	1	1	1
15:03:25.776	1	1	1	1	1	1	1	1	1	1	1	1	1	1	1	1	1	1	1
15:03:26.813	1	1	1	1	1	1	1	1	1	1	1	1	1	1	1	1	1	1	1
15:03:27.763	1	1	1	1	1	1	1	1	1	1	1	1	1	1	1	1	1	1	1
15:03:28.714	1	1	1	1	1	1	1	1	1	1	1	1	1	1	1	1	1	1	1
15:03:29.750	1	1	1	1	1	1	1	1	1	1	1	1	1	1	1	1	1	1	1
15:03:30.701	1	1	1	1	1	1	1	1	1	1	1	1	1	1	1	1	1	1	1
15:03:31.651	1	1	1	1	1	1	1	1	1	1	1	1	1	1	1	1	1	1	1
15:03:32.602	1	1	1	1	1	1	1	1	1	1	1	1	1	1	1	1	1	1	1
15:03:33.638	1	1	1	1	1	1	1	1	1	1	1	1	1	1	1	1	1	1	1
15:03:34.589	1	1	1	1	1	1	1	1	1	1	1	1	1	1	1	1	1	1	1
15:03:35.539	1	1	1	1	1	1	1	1	1	1	1	1	1	1	1	1	1	1	1
15:03:36.576	1	1	1	1	1	1	1	1	1	1	1	1	1	1	1	1	1	1	1
15:03:37.526	1	1	1	1	1	1	1	1	1	1	1	1	1	1	1	1	1	1	1
15:03:38.477	1	1	1	1	1	1	1	1	1	1	1	1	1	1	1	1	1	1	1
15:03:39.514	1	1	1	1	1	1	1	1	1	1	1	1	1	1	1	1	1	1	1
15:03:40.464	1	1	1	1	1	1	1	1	1	1	1	1	1	1	1	1	1	1	1
15:03:41.414	1	1	1	1	1	1	1	1	1	1	1	1	1	1	1	1	1	1	1
15:03:42.365	1	1	1	1	1	1	1	1	1	1	1	1	1	1	1	1	1	1	1
15:03:43.402	1	1	1	1	1	1	1	1	1	1	1	1	1	1	1	1	1	1	1
15:03:44.352	1	1	1	1	1	1	1	1	1	1	1	1	1	1	1	1	1	1	1
15:03:45.302	1	1	1	1	1	1	1	1	1	1	1	1	1	1	1	1	1	1	1
15:03:46.339	1	1	1	1	1	1	1	1	1	1	1	1	1	1	1	1	1	1	1
15:03:47.290	1	1	1	1	1	1	1	1	1	1	1	1	1	1	1	1	1	1	1
15:03:48.240	1	1	1	1	1	1	1	1	1	1	1	1	1	1	1	1	1	1	1
15:03:49.277	1	1	1	1	1	1	1	1	1	1	1	1	1	1	1	1	1	1	1
15:03:50.227	1	1	1	1	1	1	1	1	1	1	1	1	1	1	1	1	1	1	1
15:03:51.178	1	1	1	1	1	1	1	1	1	1	1	1	1	1	1	1	1	1	1
15:03:52.128	1	1	1	1	1	1	1	1	1	1	1	1	1	1	1	1	1	1	1
15:03:53.165	1	1	1	1	1	1	1	1	1	1	1	1	1	1	1	1	1	1	1
15:03:54.115	1	1	1	1	1	1	1	1	1	1	1	1	1	1	1	1	1	1	1
15:03:55.066	1	1	1	1	1	1	1	1	1	1	1	1	1	1	1	1	1	1	1
15:03:56.102	1	1	1	1	1	1	1	1	1	1	1	1	1	1	1	1	1	1	1
15:03:57.053	1	1	1	1	1	1	1	1	1	1	1	1	1	1	1	1	1	1	1
15:03:58.003	1	1	1	1	1	1	1	1	1	1	1	1	1	1	1	1	1	1	1
15:03:59.040	1	1	1	1	1	1	1	1	1	1	1	1	1	1	1	1	1	1	1
15:03:59.990	1	1	1	1	1	1	1	1	1	1	1	1	1	1	1	1	1	1	1
15:05:15.418	1	1	1	1	1	1	1	1	1	1	1	1	1	1	1	1	1	1	1
15:05:16.368	1	1	1	1	1	1	1	1	1	1	1	1	1	1	1	1	1	1	1
15:05:17.318	1	1	1	1	1	1	1	1	1	1	1	1	1	1	1	1	1	1	1
15:05:18.355	1	1	1	1	1	1	1	1	1	1	1	1	1	1	1	1	1	1	1
15:05:19.306	1	1	1	1	1	1	1	1	1	1	1	1	1	1	1	1	1	1	1
15:05:20.256	1	1	1	1	1	1	1	1	1	1	1	1	1	1	1	1	1	1	1
15:05:21.293	1	1	1	1	1	1	1	1	1	1	1	1	1	1	1	1	1	1	1
15:05:22.243	1	1	1	1	1	1	1	1	1	1	1	1	1	1	1	1	1	1	1
15:05:23.194	1	1	1	1	1	1	1	1	1	1	1	1	1	1	1	1	1	1	1
15:05:24.230	1	1	1	1	1	1	1	1	1	1	1	1	1	1	1	1	1	1	1
15:05:25.181	1	1	1	1	1	1	1	1	1	1	1	1	1	1	1	1	1	1	1
15:05:26.131	1	1	1	1	1	1	1	1	1	1	1	1	1	1	1	1	1	1	1
15:05:27.082	1	1	1	1	1	1	1	1	1	1	1	1	1	1	1	1	1	1	1
15:05:28.118	1	1	1	1	1	1	1	1	1	1	1	1	1	1	1	1	1	1	1
15:05:29.069	1	1	1	1	1	1	1	1	1	1	1	1	1	1	1	1	1	1	1
15:05:30.019	1	1	1	1	1	1	1	1	1	1	1	1	1	1	1	1	1	1	1
15:05:31.056	1	1	1	1	1	1	1	1	1	1	1	1	1	1	1	1	1	1	1
15:05:32.006	1	1	1	1	1	1	1	1	1	1	1	1	1	1	1	1	1	1	1
15:05:32.957	1	1	1	1	1	1	1	1	1	1	1	1	1	1	1	1	1	1	1
15:05:33.994	1	1	1	1	1	1	1	1	1	1	1	1	1	1	1	1	1	1	1
15:05:34.944	1	1	1	1	1	1	1	1	1	1	1	1	1	1	1	1	1	1	1
15:05:35.894	1	1	1	1	1	1	1	1	1	1	1	1	1	1	1	1	1	1	1
15:05:36.931	1	1	1	1	1	1	1	1	1	1	1	1	1	1	1	1	1	1	1
15:05:37.882	1	1	1	1	1	1	1	1	1	1	1	1	1	1	1	1	1	1	1
15:05:38.832	1	1	1	1	1	1	1	1	1	1	1	1	1	1	1	1	1	1	1
15:05:39.782	1	1	1	1	1	1	1	1	1	1	1	1	1	1	1	1	1	1	1
15:05:40.819	1	1	1	1	1	1	1	1	1	1	1	1	1	1	1	1	1	1	1
15:05:41.770	1	1	1	1	1	1	1	1	1	1	1	1	1	1	1	1	1	1	1
15:05:42.720	1	1	1	1	1	1	1	1	1	1	1	1	1	1	1	1	1	1	1
15:05:43.670	1	1	1	1	1	1	1	1	1	1	1	1	1	1	1	1	1	1	1
15:05:44.707	1	1	1	1	1	1	1	1	1	1	1	1	1	1	1	1	1	1	1
15:05:45.658	1	1	1	1	1	1	1	1	1	1	1	1	1	1	1	1	1	1	1
15:05:46.608	1	1	1	1	1	1	1	1	1	1	1	1	1	1	1	1	1	1	1
15:05:47.645	1	1	1	1	1	1	1	1	1	1	1	1	1	1	1	1	1	1	1
15:05:48.595	1	1	1	1	1	1	1	1	1	1	1	1	1	1	1	1	1	1	1
15:05:49.546	1	1	1	1	1	1	1	1	1	1	1	1	1	1	1	1	1	1	1
15:05:50.582	1	1	1	1	1	1	1	1	1	1	1	1	1	1	1	1	1	1	1
15:05:51.533	1	1	1	1	1	1	1	1	1	1	1	1	1	1	1	1	1	1	1
15:05:52.483	1	1	1	1	1	1	1	1	1	1	1	1	1	1	1	1	1	1	1
15:05:53.520	1	1	1	1	1	1	1	1	1	1	1	1	1	1	1	1	1	1	1
15:05:54.470	1	1	1	1	1	1	1	1	1	1	1	1	1	1	1	1	1	1	1
15:05:55.421	1	1	1	1	1	1	1	1	1	1	1	1	1	1	1	1	1	1	1
15:05:56.458	1	1	1	1	1	1	1	1	1	1	1	1	1	1	1	1	1	1	1
15:05:57.408	1	1	1	1	1	1	1	1	1	1	1	1	1	1	1	1	1	1	1
15:05:58.358	1	1	1	1	1	1	1	1	1	1	1	1	1	1	1	1	1	1	1
15:05:59.309	1	1	1	1	1	1	1	1	1	1	1	1	1	1	1	1	1	1	1
15:06:00.346	1	1	1	1	1	1	1	1	1	1	1	1	1	1	1	1	1	1	1
15:07:15.946	1	1	1	1	1	1	1	1	1	1	1	1	1	1	1	1	1	1	1
15:07:16.982	1	1	1	1	1	1	1	1	1	1	1	1	1	1	1	1	1	1	1
15:07:17.933	1	1	1	1	1	1	1	1	1	1	1	1	1	1	1	1	1	1	1
15:07:18.883	1	1	1	1	1	1	1	1	1	1	1	1	1	1	1	1	1	1	1
15:07:19.920	1	1	1	1	1	1	1	1	1	1	1	1	1	1	1	1	1	1	1
15:07:20.870	1	1	1	1	1	1	1	1	1	1	1	1	1	1	1	1	1	1	1
15:07:21.821	1	1	1	1	1	1	1	1	1	1	1	1	1	1	1	1	1	1	1
15:07:22.858	1	1	1	1	1	1	1	1	1	1	1	1	1	1	1	1	1	1	1
15:07:23.808	1	1	1	1	1	1	1	1	1	1	1	1	1	1	1	1	1	1	1
15:07:24.758	1	1	1	1	1	1	1	1	1	1	1	1	1	1	1	1	1	1	1
15:07:25.795	1	1	1	1	1	1	1	1	1	1	1	1	1	1	1	1	1	1	1
15:07:26.746	1	1	1	1	1	1	1	1	1	1	1	1	1	1	1	1	1	1	1
15:07:27.696	1	1	1	1	1	1	1	1	1	1	1	1	1	1	1	1	1	1	1
15:07:28.646	1	1	1	1	1	1	1	1	1	1	1	1	1	1	1	1	1	1	1
15:07:29.683	1	1	1	1	1	1	1	1	1	1	1	1	1	1	1	1	1	1	1
15:07:30.634	1	1	1	1	1	1	1	1	1	1	1	1	1	1	1	1	1	1	1
15:07:31.584	1	1	1	1	1	1	1	1	1	1	1	1	1	1	1	1	1	1	1
15:07:32.621	1	1	1	1	1	1	1	1	1	1	1	1	1	1	1	1	1	1	1
15:07:33.571	1	1	1	1	1	1	1	1	1	1	1	1	1	1	1	1	1	1	1
15:07:34.522	1	1	1	1	1	1	1	1	1	1	1	1	1	1	1	1	1	1	1
15:07:35.558	1	1	1	1	1	1	1	1	1	1	1	1	1	1	1	1	1	1	1
15:07:36.509	1	1	1	1	1	1	1	1	1	1	1	1	1	1	1	1	1	1	1
15:07:37.459	1	1	1	1	1	1	1	1	1	1	1	1	1	1	1	1	1	1	1
15:07:38.410	1	1	1	1	1	1	1	1	1	1	1	1	1	1	1	1	1	1	1
15:07:39.446	1	1	1	1	1	1	1	1	1	1	1	1	1	1	1	1	1	1	1
15:07:40.397	1	1	1	1	1	1	1	1	1	1	1	1	1	1	1	1	1	1	1
15:07:41.347	1	1	1	1	1	1	1	1	1	1	1	1	1	1	1	1	1	1	1
15:07:42.384	1	1	1	1	1	1	1	1	1	1	1	1	1	1	1	1	1	1	1
15:07:43.334	1	1	1	1	1	1	1	1	1	1	1	1	1	1	1	1	1	1	1
15:07:44.285	1	1	1	1	1	1	1	1	1	1	1	1	1	1	1	1	1	1	1
15:07:45.322	1	1	1	1	1	1	1	1	1	1	1	1	1	1	1	1	1	1	1
15:07:46.272	1	1	1	1	1	1	1	1	1	1	1	1	1	1	1	1	1	1	1
15:07:47.222	1	1	1	1	1	1	1	1	1	1	1	1	1	1	1	1	1	1	1
15:07:48.173	1	1	1	1	1	1	1	1	1	1	1	1	1	1	1	1	1	1	1
15:07:49.210	1	1	1	1	1	1	1	1	1	1	1	1	1	1	1	1	1	1	1
15:07:50.160	1	1	1	1	1	1	1	1	1	1	1	1	1	1	1	1	1	1	1
15:07:51.110	1	1	1	1	1	1	1	1	1	1	1	1	1	1	1	1	1	1	1
15:07:52.147	1	1	1	1	1	1	1	1	1	1	1	1	1	1	1	1	1	1	1
15:07:53.098	1	1	1	1	1	1	1	1	1	1	1	1	1	1	1	1	1	1	1
15:07:54.048	1	1	1	1	1	1	1	1	1	1	1	1	1	1	1	1	1	1	1
15:07:55.085	1	1	1	1	1	1	1	1	1	1	1	1	1	1	1	1	1	1	1
15:07:56.035	1	1	1	1	1	1	1	1	1	1	1	1	1	1	1	1	1	1	1
15:07:56.986	1	1	1	1	1	1	1	1	1	1	1	1	1	1	1	1	1	1	1
15:07:58.022	1	1	1	1	1	1	1	1	1	1	1	1	1	1	1	1	1	1	1
15:07:58.973	1	1	1	1	1	1	1	1	1	1	1	1	1	1	1	1	1	1	1
15:07:59.923	1	1	1	1	1	1	1	1	1	1	1	1	1	1	1	1	1	1	1
15:09:15.437	1	1	1	1	1	1	1	1	1	1	1	1	1	1	1	1	1	1	1
15:09:16.387	1	1	1	1	1	1	1	1	1	1	1	1	1	1	1	1	1	1	1
15:09:17.338	1	1	1	1	1	1	1	1	1	1	1	1	1	1	1	1	1	1	1
15:09:18.288	1	1	1	1	1	1	1	1	1	1	1	1	1	1	1	1	1	1	1
15:09:19.325	1	1	1	1	1	1	1	1	1	1	1	1	1	1	1	1	1	1	1
15:09:20.275	1	1	1	1	1	1	1	1	1	1	1	1	1	1	1	1	1	1	1
15:09:21.226	1	1	1	1	1	1	1	1	1	1	1	1	1	1	1	1	1	1	1
15:09:22.262	1	1	1	1	1	1	1	1	1	1	1	1	1	1	1	1	1	1	1
15:09:23.213	1	1	1	1	1	1	1	1	1	1	1	1	1	1	1	1	1	1	1
15:09:24.163	1	1	1	1	1	1	1	1	1	1	1	1	1	1	1	1	1	1	1
15:09:25.200	1	1	1	1	1	1	1	1	1	1	1	1	1	1	1	1	1	1	1
15:09:26.150	1	1	1	1	1	1	1	1	1	1	1	1	1	1	1	1	1	1	1
15:09:27.101	1	1	1	1	1	1	1	1	1	1	1	1	1	1	1	1	1	1	1
15:09:28.051	1	1	1	1	1	1	1	1	1	1	1	1	1	1	1	1	1	1	1
15:09:29.088	1	1	1	1	1	1	1	1	1	1	1	1	1	1	1	1	1	1	1
15:09:30.038	1	1	1	1	1	1	1	1	1	1	1	1	1	1	1	1	1	1	1
15:09:30.989	1	1	1	1	1	1	1	1	1	1	1	1	1	1	1	1	1	1	1
15:09:32.026	1	1	1	1	1	1	1	1	1	1	1	1	1	1	1	1	1	1	1
15:09:32.976	1	1	1	1	1	1	1	1	1	1	1	1	1	1	1	1	1	1	1
15:09:33.926	1	1	1	1	1	1	1	1	1	1	1	1	1	1	1	1	1	1	1
15:09:34.963	1	1	1	1	1	1	1	1	1	1	1	1	1	1	1	1	1	1	1
15:09:35.914	1	1	1	1	1	1	1	1	1	1	1	1	1	1	1	1	1	1	1
15:09:36.864	1	1	1	1	1	1	1	1	1	1	1	1	1	1	1	1	1	1	1
15:09:37.814	1	1	1	1	1	1	1	1	1	1	1	1	1	1	1	1	1	1	1
15:09:38.851	1	1	1	1	1	1	1	1	1	1	1	1	1	1	1	1	1	1	1
15:09:39.802	1	1	1	1	1	1	1	1	1	1	1	1	1	1	1	1	1	1	1
15:09:40.838	1	1	1	1	1	1	1	1	1	1	1	1	1	1	1	1	1	1	1
15:09:41.789	1	1	1	1	1	1	1	1	1	1	1	1	1	1	1	1	1	1	1
15:09:42.739	1	1	1	1	1	1	1	1	1	1	1	1	1	1	1	1	1	1	1
15:09:43.690	1	1	1	1	1	1	1	1	1	1	1	1	1	1	1	1	1	1	1
15:09:44.726	1	1	1	1	1	1	1	1	1	1	1	1	1	1	1	1	1	1	1
15:09:45.677	1	1	1	1	1	1	1	1	1	1	1	1	1	1	1	1	1	1	1
15:09:46.627	1	1	1	1	1	1	1	1	1	1	1	1	1	1	1	1	1	1	1
15:09:47.664	1	1	1	1	1	1	1	1	1	1	1	1	1	1	1	1	1	1	1
15:09:48.614	1	1	1	1	1	1	1	1	1	1	1	1	1	1	1	1	1	1	1
15:09:49.565	1	1	1	1	1	1	1	1	1	1	1	1	1	1	1	1	1	1	1
15:09:50.602	1	1	1	1	1	1	1	1	1	1	1	1	1	1	1	1	1	1	1
15:09:51.552	1	1	1	1	1	1	1	1	1	1	1	1	1	1	1	1	1	1	1
15:09:52.502	1	1	1	1	1	1	1	1	1	1	1	1	1	1	1	1	1	1	1
15:09:53.453	1	1	1	1	1	1	1	1	1	1	1	1	1	1	1	1	1	1	1
15:09:54.490	1	1	1	1	1	1	1	1	1	1	1	1	1	1	1	1	1	1	1
15:09:55.440	1	1	1	1	1	1	1	1	1	1	1	1	1	1	1	1	1	1	1
15:09:56.390	1	1	1	1	1	1	1	1	1	1	1	1	1	1	1	1	1	1	1
15:09:57.427	1	1	1	1	1	1	1	1	1	1	1	1	1	1	1	1	1	1	1
15:09:58.378	1	1	1	1	1	1	1	1	1	1	1	1	1	1	1	1	1	1	1
15:09:59.328	1	1	1	1	1	1	1	1	1	1	1	1	1	1	1	1	1	1	1
15:11:15.360	1	1	1	1	1	1	1	1	1	1	1	1	1	1	1	1	1	1	1
15:11:16.397	1	1	1	1	1	1	1	1	1	1	1	1	1	1	1	1	1	1	1
15:11:17.347	1	1	1	1	1	1	1	1	1	1	1	1	1	1	1	1	1	1	1
15:11:18.298	1	1	1	1	1	1	1	1	1	1	1	1	1	1	1	1	1	1	1
15:11:19.334	1	1	1	1	1	1	1	1	1	1	1	1	1	1	1	1	1	1	1
15:11:20.285	1	1	1	1	1	1	1	1	1	1	1	1	1	1	1	1	1	1	1
15:11:21.235	1	1	1	1	1	1	1	1	1	1	1	1	1	1	1	1	1	1	1
15:11:22.272	1	1	1	1	1	1	1	1	1	1	1	1	1	1	1	1	1	1	1
15:11:23.222	1	1	1	1	1	1	1	1	1	1	1	1	1	1	1	1	1	1	1
15:11:24.173	1	1	1	1	1	1	1	1	1	1	1	1	1	1	1	1	1	1	1
15:11:25.123	1	1	1	1	1	1	1	1	1	1	1	1	1	1	1	1	1	1	1
15:11:26.160	1	1	1	1	1	1	1	1	1	1	1	1	1	1	1	1	1	1	1
15:11:27.110	1	1	1	1	1	1	1	1	1	1	1	1	1	1	1	1	1	1	1
15:11:28.061	1	1	1	1	1	1	1	1	1	1	1	1	1	1	1	1	1	1	1
15:11:29.098	1	1	1	1	1	1	1	1	1	1	1	1	1	1	1	1	1	1	1
15:11:30.048	1	1	1	1	1	1	1	1	1	1	1	1	1	1	1	1	1	1	1
15:11:30.998	1	1	1	1	1	1	1	1	1	1	1	1	1	1	1	1	1	1	1
15:11:32.035	1	1	1	1	1	1	1	1	1	1	1	1	1	1	1	1	1	1	1
15:11:32.986	1	1	1	1	1	1	1	1	1	1	1	1	1	1	1	1	1	1	1
15:11:33.936	1	1	1	1	1	1	1	1	1	1	1	1	1	1	1	1	1	1	1
15:11:34.886	1	1	1	1	1	1	1	1	1	1	1	1	1	1	1	1	1	1	1
15:11:35.923	1	1	1	1	1	1	1	1	1	1	1	1	1	1	1	1	1	1	1
15:11:36.874	1	1	1	1	1	1	1	1	1	1	1	1	1	1	1	1	1	1	1
15:11:37.824	1	1	1	1	1	1	1	1	1	1	1	1	1	1	1	1	1	1	1
15:11:38.861	1	1	1	1	1	1	1	1	1	1	1	1	1	1	1	1	1	1	1
15:11:39.811	1	1	1	1	1	1	1	1	1	1	1	1	1	1	1	1	1	1	1
15:11:40.762	1	1	1	1	1	1	1	1	1	1	1	1	1	1	1	1	1	1	1
15:11:41.798	1	1	1	1	1	1	1	1	1	1	1	1	1	1	1	1	1	1	1
15:11:42.749	1	1	1	1	1	1	1	1	1	1	1	1	1	1	1	1	1	1	1
15:11:43.699	1	1	1	1	1	1	1	1	1	1	1	1	1	1	1	1	1	1	1
15:11:44.736	1	1	1	1	1	1	1	1	1	1	1	1	1	1	1	1	1	1	1
15:11:45.686	1	1	1	1	1	1	1	1	1	1	1	1	1	1	1	1	1	1	1
15:11:46.637	1	1	1	1	1	1	1	1	1	1	1	1	1	1	1	1	1	1	1
15:11:47.587	1	1	1	1	1	1	1	1	1	1	1	1	1	1	1	1	1	1	1
15:11:48.624	1	1	1	1	1	1	1	1	1	1	1	1	1	1	1	1	1	1	1
15:11:49.574	1	1	1	1	1	1	1	1	1	1	1	1	1	1	1	1	1	1	1
15:11:50.525	1	1	1	1	1	1	1	1	1	1	1	1	1	1	1	1	1	1	1
15:11:51.562	1	1	1	1	1	1	1	1	1	1	1	1	1	1	1	1	1	1	1
15:11:52.512	1	1	1	1	1	1	1	1	1	1	1	1	1	1	1	1	1	1	1
15:11:53.462	1	1	1	1	1	1	1	1	1	1	1	1	1	1	1	1	1	1	1
15:11:54.499	1	1	1	1	1	1	1	1	1	1	1	1	1	1	1	1	1	1	1
15:11:55.450	1	1	1	1	1	1	1	1	1	1	1	1	1	1	1	1	1	1	1
15:11:56.400	1	1	1	1	1	1	1	1	1	1	1	1	1	1	1	1	1	1	1
15:11:57.350	1	1	1	1	1	1	1	1	1	1	1	1	1	1	1	1	1	1	1
15:11:58.387	1	1	1	1	1	1	1	1	1	1	1	1	1	1	1	1	1	1	1
15:11:59.338	1	1	1	1	1	1	1	1	1	1	1	1	1	1	1	1	1	1	1
15:12:00.288	1	1	1	1	1	1	1	1	1	1	1	1	1	1	1	1	1	1	1
15:13:15.802	1	1	1	1	1	1	1	1	1	1	1	1	1	1	1	1	1	1	1
15:13:16.838	1	1	1	1	1	1	1	1	1	1	1	1	1	1	1	1	1	1	1
15:13:17.789	1	1	1	1	1	1	1	1	1	1	1	1	1	1	1	1	1	1	1
15:13:18.739	1	1	1	1	1	1	1	1	1	1	1	1	1	1	1	1	1	1	1
15:13:19.776	1	1	1	1	1	1	1	1	1	1	1	1	1	1	1	1	1	1	1
15:13:20.726	1	1	1	1	1	1	1	1	1	1	1	1	1	1	1	1	1	1	1
15:13:21.677	1	1	1	1	1	1	1	1	1	1	1	1	1	1	1	1	1	1	1
15:13:22.627	1	1	1	1	1	1	1	1	1	1	1	1	1	1	1	1	1	1	1
15:13:23.664	1	1	1	1	1	1	1	1	1	1	1	1	1	1	1	1	1	1	1
15:13:24.614	1	1	1	1	1	1	1	1	1	1	1	1	1	1	1	1	1	1	1
15:13:25.565	1	1	1	1	1	1	1	1	1	1	1	1	1	1	1	1	1	1	1
15:13:26.602	1	1	1	1	1	1	1	1	1	1	1	1	1	1	1	1	1	1	1
15:13:27.552	1	1	1	1	1	1	1	1	1	1	1	1	1	1	1	1	1	1	1
15:13:28.502	1	1	1	1	1	1	1	1	1	1	1	1	1	1	1	1	1	1	1
15:13:29.539	1	1	1	1	1	1	1	1	1	1	1	1	1	1	1	1	1	1	1
15:13:30.490	1	1	1	1	1	1	1	1	1	1	1	1	1	1	1	1	1	1	1
15:13:31.440	1	1	1	1	1	1	1	1	1	1	1	1	1	1	1	1	1	1	1
15:13:32.477	1	1	1	1	1	1	1	1	1	1	1	1	1	1	1	1	1	1	1
15:13:33.427	1	1	1	1	1	1	1	1	1	1	1	1	1	1	1	1	1	1	1
15:13:34.378	1	1	1	1	1	1	1	1	1	1	1	1	1	1	1	1	1	1	1
15:13:35.328	1	1	1	1	1	1	1	1	1	1	1	1	1	1	1	1	1	1	1
15:13:36.365	1	1	1	1	1	1	1	1	1	1	1	1	1	1	1	1	1	1	1
15:13:37.315	1	1	1	1	1	1	1	1	1	1	1	1	1	1	1	1	1	1	1
15:13:38.266	1	1	1	1	1	1	1	1	1	1	1	1	1	1	1	1	1	1	1
15:13:39.302	1	1	1	1	1	1	1	1	1	1	1	1	1	1	1	1	1	1	1
15:13:40.253	1	1	1	1	1	1	1	1	1	1	1	1	1	1	1	1	1	1	1
15:13:41.203	1	1	1	1	1	1	1	1	1	1	1	1	1	1	1	1	1	1	1
15:13:42.240	1	1	1	1	1	1	1	1	1	1	1	1	1	1	1	1	1	1	1
15:13:43.190	1	1	1	1	1	1	1	1	1	1	1	1	1	1	1	1	1	1	1
15:13:44.141	1	1	1	1	1	1	1	1	1	1	1	1	1	1	1	1	1	1	1
15:13:45.091	1	1	1	1	1	1	1	1	1	1	1	1	1	1	1	1	1	1	1
15:13:46.128	1	1	1	1	1	1	1	1	1	1	1	1	1	1	1	1	1	1	1
15:13:47.078	1	1	1	1	1	1	1	1	1	1	1	1	1	1	1	1	1	1	1
15:13:48.115	1	1	1	1	1	1	1	1	1	1	1	1	1	1	1	1	1	1	1
15:13:49.066	1	1	1	1	1	1	1	1	1	1	1	1	1	1	1	1	1	1	1
15:13:50.016	1	1	1	1	1	1	1	1	1	1	1	1	1	1	1	1	1	1	1
15:13:50.966	1	1	1	1	1	1	1	1	1	1	1	1	1	1	1	1	1	1	1
15:13:52.003	1	1	1	1	1	1	1	1	1	1	1	1	1	1	1	1	1	1	1
15:13:52.954	1	1	1	1	1	1	1	1	1	1	1	1	1	1	1	1	1	1	1
15:13:53.904	1	1	1	1	1	1	1	1	1	1	1	1	1	1	1	1	1	1	1
15:13:54.854	1	1	1	1	1	1	1	1	1	1	1	1	1	1	1	1	1	1	1
15:13:55.891	1	1	1	1	1	1	1	1	1	1	1	1	1	1	1	1	1	1	1
15:13:56.842	1	1	1	1	1	1	1	1	1	1	1	1	1	1	1	1	1	1	1
15:13:57.792	1	1	1	1	1	1	1	1	1	1	1	1	1	1	1	1	1	1	1
15:13:58.829	1	1	1	1	1	1	1	1	1	1	1	1	1	1	1	1	1	1	1
15:13:59.779	1	1	1	1	1	1	1	1	1	1	1	1	1	1	1	1	1	1	1
15:15:15.466	1	1	1	1	1	1	1	1	1	1	1	1	1	1	1	1	1	1	1
15:15:16.416	1	1	1	1	1	1	1	1	1	1	1	1	1	1	1	1	1	1	1
15:15:17.366	1	1	1	1	1	1	1	1	1	1	1	1	1	1	1	1	1	1	1
15:15:18.403	1	1	1	1	1	1	1	1	1	1	1	1	1	1	1	1	1	1	1
15:15:19.354	1	1	1	1	1	1	1	1	1	1	1	1	1	1	1	1	1	1	1
15:15:20.304	1	1	1	1	1	1	1	1	1	1	1	1	1	1	1	1	1	1	1
15:15:21.254	1	1	1	1	1	1	1	1	1	1	1	1	1	1	1	1	1	1	1
15:15:22.291	1	1	1	1	1	1	1	1	1	1	1	1	1	1	1	1	1	1	1
15:15:23.242	1	1	1	1	1	1	1	1	1	1	1	1	1	1	1	1	1	1	1
15:15:24.192	1	1	1	1	1	1	1	1	1	1	1	1	1	1	1	1	1	1	1
15:15:25.229	1	1	1	1	1	1	1	1	1	1	1	1	1	1	1	1	1	1	1
15:15:26.179	1	1	1	1	1	1	1	1	1	1	1	1	1	1	1	1	1	1	1
15:15:27.130	1	1	1	1	1	1	1	1	1	1	1	1	1	1	1	1	1	1	1
15:15:28.166	1	1	1	1	1	1	1	1	1	1	1	1	1	1	1	1	1	1	1
15:15:29.117	1	1	1	1	1	1	1	1	1	1	1	1	1	1	1	1	1	1	1
15:15:30.067	1	1	1	1	1	1	1	1	1	1	1	1	1	1	1	1	1	1	1
15:15:31.018	1	1	1	1	1	1	1	1	1	1	1	1	1	1	1	1	1	1	1
15:15:32.054	1	1	1	1	1	1	1	1	1	1	1	1	1	1	1	1	1	1	1
15:15:33.005	1	1	1	1	1	1	1	1	1	1	1	1	1	1	1	1	1	1	1
15:15:33.955	1	1	1	1	1	1	1	1	1	1	1	1	1	1	1	1	1	1	1
15:15:34.992	1	1	1	1	1	1	1	1	1	1	1	1	1	1	1	1	1	1	1
15:15:35.942	1	1	1	1	1	1	1	1	1	1	1	1	1	1	1	1	1	1	1
15:15:36.893	1	1	1	1	1	1	1	1	1	1	1	1	1	1	1	1	1	1	1
15:15:37.930	1	1	1	1	1	1	1	1	1	1	1	1	1	1	1	1	1	1	1
15:15:38.880	1	1	1	1	1	1	1	1	1	1	1	1	1	1	1	1	1	1	1
15:15:39.830	1	1	1	1	1	1	1	1	1	1	1	1	1	1	1	1	1	1	1
15:15:40.867	1	1	1	1	1	1	1	1	1	1	1	1	1	1	1	1	1	1	1
15:15:41.818	1	1	1	1	1	1	1	1	1	1	1	1	1	1	1	1	1	1	1
15:15:42.768	1	1	1	1	1	1	1	1	1	1	1	1	1	1	1	1	1	1	1
15:15:43.718	1	1	1	1	1	1	1	1	1	1	1	1	1	1	1	1	1	1	1
15:15:44.755	1	1	1	1	1	1	1	1	1	1	1	1	1	1	1	1	1	1	1
15:15:45.706	1	1	1	1	1	1	1	1	1	1	1	1	1	1	1	1	1	1	1
15:15:46.656	1	1	1	1	1	1	1	1	1	1	1	1	1	1	1	1	1	1	1
15:15:47.693	1	1	1	1	1	1	1	1	1	1	1	1	1	1	1	1	1	1	1
15:15:48.643	1	1	1	1	1	1	1	1	1	1	1	1	1	1	1	1	1	1	1
15:15:49.594	1	1	1	1	1	1	1	1	1	1	1	1	1	1	1	1	1	1	1
15:15:50.630	1	1	1	1	1	1	1	1	1	1	1	1	1	1	1	1	1	1	1
15:15:51.581	1	1	1	1	1	1	1	1	1	1	1	1	1	1	1	1	1	1	1
15:15:52.531	1	1	1	1	1	1	1	1	1	1	1	1	1	1	1	1	1	1	1
15:15:53.482	1	1	1	1	1	1	1	1	1	1	1	1	1	1	1	1	1	1	1
15:15:54.518	1	1	1	1	1	1	1	1	1	1	1	1	1	1	1	1	1	1	1
15:15:55.469	1	1	1	1	1	1	1	1	1	1	1	1	1	1	1	1	1	1	1
15:15:56.419	1	1	1	1	1	1	1	1	1	1	1	1	1	1	1	1	1	1	1
15:15:57.456	1	1	1	1	1	1	1	1	1	1	1	1	1	1	1	1	1	1	1
15:15:58.406	1	1	1	1	1	1	1	1	1	1	1	1	1	1	1	1	1	1	1
15:15:59.357	1	1	1	1	1	1	1	1	1	1	1	1	1	1	1	1	1	1	1
15:16:00.394	1	1	1	1	1	1	1	1	1	1	1	1	1	1	1	1	1	1	1
15:17:15.821	1	1	1	1	1	1	1	1	1	1	1	1	1	1	1	1	1	1	1
15:17:16.858	1	1	1	1	1	1	1	1	1	1	1	1	1	1	1	1	1	1	1
15:17:17.808	1	1	1	1	1	1	1	1	1	1	1	1	1	1	1	1	1	1	1
15:17:18.758	1	1	1	1	1	1	1	1	1	1	1	1	1	1	1	1	1	1	1
15:17:19.795	1	1	1	1	1	1	1	1	1	1	1	1	1	1	1	1	1	1	1
15:17:20.746	1	1	1	1	1	1	1	1	1	1	1	1	1	1	1	1	1	1	1
15:17:21.696	1	1	1	1	1	1	1	1	1	1	1	1	1	1	1	1	1	1	1
15:17:22.733	1	1	1	1	1	1	1	1	1	1	1	1	1	1	1	1	1	1	1
15:17:23.683	1	1	1	1	1	1	1	1	1	1	1	1	1	1	1	1	1	1	1
15:17:24.634	1	1	1	1	1	1	1	1	1	1	1	1	1	1	1	1	1	1	1
15:17:25.670	1	1	1	1	1	1	1	1	1	1	1	1	1	1	1	1	1	1	1
15:17:26.621	1	1	1	1	1	1	1	1	1	1	1	1	1	1	1	1	1	1	1
15:17:27.571	1	1	1	1	1	1	1	1	1	1	1	1	1	1	1	1	1	1	1
15:17:28.522	1	1	1	1	1	1	1	1	1	1	1	1	1	1	1	1	1	1	1
15:17:29.558	1	1	1	1	1	1	1	1	1	1	1	1	1	1	1	1	1	1	1
15:17:30.509	1	1	1	1	1	1	1	1	1	1	1	1	1	1	1	1	1	1	1
15:17:31.459	1	1	1	1	1	1	1	1	1	1	1	1	1	1	1	1	1	1	1
15:17:32.496	1	1	1	1	1	1	1	1	1	1	1	1	1	1	1	1	1	1	1
15:17:33.446	1	1	1	1	1	1	1	1	1	1	1	1	1	1	1	1	1	1	1
15:17:34.397	1	1	1	1	1	1	1	1	1	1	1	1	1	1	1	1	1	1	1
15:17:35.434	1	1	1	1	1	1	1	1	1	1	1	1	1	1	1	1	1	1	1
15:17:36.384	1	1	1	1	1	1	1	1	1	1	1	1	1	1	1	1	1	1	1
15:17:37.334	1	1	1	1	1	1	1	1	1	1	1	1	1	1	1	1	1	1	1
15:17:38.285	1	1	1	1	1	1	1	1	1	1	1	1	1	1	1	1	1	1	1
15:17:39.322	1	1	1	1	1	1	1	1	1	1	1	1	1	1	1	1	1	1	1
15:17:40.272	1	1	1	1	1	1	1	1	1	1	1	1	1	1	1	1	1	1	1
15:17:41.222	1	1	1	1	1	1	1	1	1	1	1	1	1	1	1	1	1	1	1
15:17:42.259	1	1	1	1	1	1	1	1	1	1	1	1	1	1	1	1	1	1	1
15:17:43.210	1	1	1	1	1	1	1	1	1	1	1	1	1	1	1	1	1	1	1
15:17:44.160	1	1	1	1	1	1	1	1	1	1	1	1	1	1	1	1	1	1	1
15:17:45.197	1	1	1	1	1	1	1	1	1	1	1	1	1	1	1	1	1	1	1
15:17:46.147	1	1	1	1	1	1	1	1	1	1	1	1	1	1	1	1	1	1	1
15:17:47.098	1	1	1	1	1	1	1	1	1	1	1	1	1	1	1	1	1	1	1
15:17:48.048	1	1	1	1	1	1	1	1	1	1	1	1	1	1	1	1	1	1	1
15:17:49.085	1	1	1	1	1	1	1	1	1	1	1	1	1	1	1	1	1	1	1
15:17:50.035	1	1	1	1	1	1	1	1	1	1	1	1	1	1	1	1	1	1	1
15:17:50.986	1	1	1	1	1	1	1	1	1	1	1	1	1	1	1	1	1	1	1
15:17:52.022	1	1	1	1	1	1	1	1	1	1	1	1	1	1	1	1	1	1	1
15:17:52.973	1	1	1	1	1	1	1	1	1	1	1	1	1	1	1	1	1	1	1
15:17:53.923	1	1	1	1	1	1	1	1	1	1	1	1	1	1	1	1	1	1	1
15:17:54.874	1	1	1	1	1	1	1	1	1	1	1	1	1	1	1	1	1	1	1
15:17:55.910	1	1	1	1	1	1	1	1	1	1	1	1	1	1	1	1	1	1	1
15:17:56.861	1	1	1	1	1	1	1	1	1	1	1	1	1	1	1	1	1	1	1
15:17:57.898	1	1	1	1	1	1	1	1	1	1	1	1	1	1	1	1	1	1	1
15:17:58.848	1	1	1	1	1	1	1	1	1	1	1	1	1	1	1	1	1	1	1
15:17:59.798	1	1	1	1	1	1	1	1	1	1	1	1	1	1	1	1	1	1	1
15:19:15.571	1	1	1	1	1	1	1	1	1	1	1	1	1	1	1	1	1	1	1
15:19:16.522	1	1	1	1	1	1	1	1	1	1	1	1	1	1	1	1	1	1	1
15:19:17.558	1	1	1	1	1	1	1	1	1	1	1	1	1	1	1	1	1	1	1
15:19:18.509	1	1	1	1	1	1	1	1	1	1	1	1	1	1	1	1	1	1	1
15:19:19.459	1	1	1	1	1	1	1	1	1	1	1	1	1	1	1	1	1	1	1
15:19:20.496	1	1	1	1	1	1	1	1	1	1	1	1	1	1	1	1	1	1	1
15:19:21.446	1	1	1	1	1	1	1	1	1	1	1	1	1	1	1	1	1	1	1
15:19:22.397	1	1	1	1	1	1	1	1	1	1	1	1	1	1	1	1	1	1	1
15:19:23.347	1	1	1	1	1	1	1	1	1	1	1	1	1	1	1	1	1	1	1
15:19:24.384	1	1	1	1	1	1	1	1	1	1	1	1	1	1	1	1	1	1	1
15:19:25.334	1	1	1	1	1	1	1	1	1	1	1	1	1	1	1	1	1	1	1
15:19:26.285	1	1	1	1	1	1	1	1	1	1	1	1	1	1	1	1	1	1	1
15:19:27.322	1	1	1	1	1	1	1	1	1	1	1	1	1	1	1	1	1	1	1
15:19:28.272	1	1	1	1	1	1	1	1	1	1	1	1	1	1	1	1	1	1	1
15:19:29.222	1	1	1	1	1	1	1	1	1	1	1	1	1	1	1	1	1	1	1
15:19:30.259	1	1	1	1	1	1	1	1	1	1	1	1	1	1	1	1	1	1	1
15:19:31.210	1	1	1	1	1	1	1	1	1	1	1	1	1	1	1	1	1	1	1
15:19:32.160	1	1	1	1	1	1	1	1	1	1	1	1	1	1	1	1	1	1	1
15:19:33.110	1	1	1	1	1	1	1	1	1	1	1	1	1	1	1	1	1	1	1
15:19:34.147	1	1	1	1	1	1	1	1	1	1	1	1	1	1	1	1	1	1	1
15:19:35.098	1	1	1	1	1	1	1	1	1	1	1	1	1	1	1	1	1	1	1
15:19:36.048	1	1	1	1	1	1	1	1	1	1	1	1	1	1	1	1	1	1	1
15:19:37.085	1	1	1	1	1	1	1	1	1	1	1	1	1	1	1	1	1	1	1
15:19:38.035	1	1	1	1	1	1	1	1	1	1	1	1	1	1	1	1	1	1	1
15:19:38.986	1	1	1	1	1	1	1	1	1	1	1	1	1	1	1	1	1	1	1
15:19:40.022	1	1	1	1	1	1	1	1	1	1	1	1	1	1	1	1	1	1	1
15:19:40.973	1	1	1	1	1	1	1	1	1	1	1	1	1	1	1	1	1	1	1
15:19:41.923	1	1	1	1	1	1	1	1	1	1	1	1	1	1	1	1	1	1	1
15:19:42.874	1	1	1	1	1	1	1	1	1	1	1	1	1	1	1	1	1	1	1
15:19:43.910	1	1	1	1	1	1	1	1	1	1	1	1	1	1	1	1	1	1	1
15:19:44.861	1	1	1	1	1	1	1	1	1	1	1	1	1	1	1	1	1	1	1
15:19:45.811	1	1	1	1	1	1	1	1	1	1	1	1	1	1	1	1	1	1	1
15:19:46.848	1	1	1	1	1	1	1	1	1	1	1	1	1	1	1	1	1	1	1
15:19:47.798	1	1	1	1	1	1	1	1	1	1	1	1	1	1	1	1	1	1	1
15:19:48.749	1	1	1	1	1	1	1	1	1	1	1	1	1	1	1	1	1	1	1
15:19:49.786	1	1	1	1	1	1	1	1	1	1	1	1	1	1	1	1	1	1	1
15:19:50.736	1	1	1	1	1	1	1	1	1	1	1	1	1	1	1	1	1	1	1
15:19:51.686	1	1	1	1	1	1	1	1	1	1	1	1	1	1	1	1	1	1	1
15:19:52.637	1	1	1	1	1	1	1	1	1	1	1	1	1	1	1	1	1	1	1
15:19:53.674	1	1	1	1	1	1	1	1	1	1	1	1	1	1	1	1	1	1	1
15:19:54.624	1	1	1	1	1	1	1	1	1	1	1	1	1	1	1	1	1	1	1
15:19:55.574	1	1	1	1	1	1	1	1	1	1	1	1	1	1	1	1	1	1	1
15:19:56.611	1	1	1	1	1	1	1	1	1	1	1	1	1	1	1	1	1	1	1
15:19:57.562	1	1	1	1	1	1	1	1	1	1	1	1	1	1	1	1	1	1	1
15:19:58.512	1	1	1	1	1	1	1	1	1	1	1	1	1	1	1	1	1	1	1
15:19:59.549	1	1	1	1	1	1	1	1	1	1	1	1	1	1	1	1	1	1	1
15:21:15.149	1	1	1	1	1	1	1	1	1	1	1	1	1	1	1	1	1	1	1
15:21:16.099	1	1	1	1	1	1	1	1	1	1	1	1	1	1	1	1	1	1	1
15:21:17.050	1	1	1	1	1	1	1	1	1	1	1	1	1	1	1	1	1	1	1
15:21:18.086	1	1	1	1	1	1	1	1	1	1	1	1	1	1	1	1	1	1	1
15:21:19.037	1	1	1	1	1	1	1	1	1	1	1	1	1	1	1	1	1	1	1
15:21:19.987	1	1	1	1	1	1	1	1	1	1	1	1	1	1	1	1	1	1	1
15:21:21.024	1	1	1	1	1	1	1	1	1	1	1	1	1	1	1	1	1	1	1
15:21:21.974	1	1	1	1	1	1	1	1	1	1	1	1	1	1	1	1	1	1	1
15:21:22.925	1	1	1	1	1	1	1	1	1	1	1	1	1	1	1	1	1	1	1
15:21:23.962	1	1	1	1	1	1	1	1	1	1	1	1	1	1	1	1	1	1	1
15:21:24.912	1	1	1	1	1	1	1	1	1	1	1	1	1	1	1	1	1	1	1
15:21:25.862	1	1	1	1	1	1	1	1	1	1	1	1	1	1	1	1	1	1	1
15:21:26.899	1	1	1	1	1	1	1	1	1	1	1	1	1	1	1	1	1	1	1
15:21:27.850	1	1	1	1	1	1	1	1	1	1	1	1	1	1	1	1	1	1	1
15:21:28.800	1	1	1	1	1	1	1	1	1	1	1	1	1	1	1	1	1	1	1
15:21:29.750	1	1	1	1	1	1	1	1	1	1	1	1	1	1	1	1	1	1	1
15:21:30.787	1	1	1	1	1	1	1	1	1	1	1	1	1	1	1	1	1	1	1
15:21:31.738	1	1	1	1	1	1	1	1	1	1	1	1	1	1	1	1	1	1	1
15:21:32.688	1	1	1	1	1	1	1	1	1	1	1	1	1	1	1	1	1	1	1
15:21:33.725	1	1	1	1	1	1	1	1	1	1	1	1	1	1	1	1	1	1	1
15:21:34.675	1	1	1	1	1	1	1	1	1	1	1	1	1	1	1	1	1	1	1
15:21:35.626	1	1	1	1	1	1	1	1	1	1	1	1	1	1	1	1	1	1	1
15:21:36.662	1	1	1	1	1	1	1	1	1	1	1	1	1	1	1	1	1	1	1
15:21:37.613	1	1	1	1	1	1	1	1	1	1	1	1	1	1	1	1	1	1	1
15:21:38.563	1	1	1	1	1	1	1	1	1	1	1	1	1	1	1	1	1	1	1
15:21:39.514	1	1	1	1	1	1	1	1	1	1	1	1	1	1	1	1	1	1	1
15:21:40.550	1	1	1	1	1	1	1	1	1	1	1	1	1	1	1	1	1	1	1
15:21:41.501	1	1	1	1	1	1	1	1	1	1	1	1	1	1	1	1	1	1	1
15:21:42.451	1	1	1	1	1	1	1	1	1	1	1	1	1	1	1	1	1	1	1
15:21:43.488	1	1	1	1	1	1	1	1	1	1	1	1	1	1	1	1	1	1	1
15:21:44.438	1	1	1	1	1	1	1	1	1	1	1	1	1	1	1	1	1	1	1
15:21:45.389	1	1	1	1	1	1	1	1	1	1	1	1	1	1	1	1	1	1	1
15:21:46.339	1	1	1	1	1	1	1	1	1	1	1	1	1	1	1	1	1	1	1
15:21:47.376	1	1	1	1	1	1	1	1	1	1	1	1	1	1	1	1	1	1	1
15:21:48.326	1	1	1	1	1	1	1	1	1	1	1	1	1	1	1	1	1	1	1
15:21:49.277	1	1	1	1	1	1	1	1	1	1	1	1	1	1	1	1	1	1	1
15:21:50.314	1	1	1	1	1	1	1	1	1	1	1	1	1	1	1	1	1	1	1
15:21:51.264	1	1	1	1	1	1	1	1	1	1	1	1	1	1	1	1	1	1	1
15:21:52.214	1	1	1	1	1	1	1	1	1	1	1	1	1	1	1	1	1	1	1
15:21:53.251	1	1	1	1	1	1	1	1	1	1	1	1	1	1	1	1	1	1	1
15:21:54.202	1	1	1	1	1	1	1	1	1	1	1	1	1	1	1	1	1	1	1
15:21:55.152	1	1	1	1	1	1	1	1	1	1	1	1	1	1	1	1	1	1	1
15:21:56.189	1	1	1	1	1	1	1	1	1	1	1	1	1	1	1	1	1	1	1
15:21:57.139	1	1	1	1	1	1	1	1	1	1	1	1	1	1	1	1	1	1	1
15:21:58.090	1	1	1	1	1	1	1	1	1	1	1	1	1	1	1	1	1	1	1
15:21:59.040	1	1	1	1	1	1	1	1	1	1	1	1	1	1	1	1	1	1	1
15:22:00.077	1	1	1	1	1	1	1	1	1	1	1	1	1	1	1	1	1	1	1
15:23:15.850	1	1	1	1	1	1	1	1	1	1	1	1	1	1	1	1	1	1	1
15:23:16.800	1	1	1	1	1	1	1	1	1	1	1	1	1	1	1	1	1	1	1
15:23:17.837	1	1	1	1	1	1	1	1	1	1	1	1	1	1	1	1	1	1	1
15:23:18.787	1	1	1	1	1	1	1	1	1	1	1	1	1	1	1	1	1	1	1
15:23:19.738	1	1	1	1	1	1	1	1	1	1	1	1	1	1	1	1	1	1	1
15:23:20.774	1	1	1	1	1	1	1	1	1	1	1	1	1	1	1	1	1	1	1
15:23:21.725	1	1	1	1	1	1	1	1	1	1	1	1	1	1	1	1	1	1	1
15:23:22.675	1	1	1	1	1	1	1	1	1	1	1	1	1	1	1	1	1	1	1
15:23:23.626	1	1	1	1	1	1	1	1	1	1	1	1	1	1	1	1	1	1	1
15:23:24.662	1	1	1	1	1	1	1	1	1	1	1	1	1	1	1	1	1	1	1
15:23:25.613	1	1	1	1	1	1	1	1	1	1	1	1	1	1	1	1	1	1	1
15:23:26.563	1	1	1	1	1	1	1	1	1	1	1	1	1	1	1	1	1	1	1
15:23:27.600	1	1	1	1	1	1	1	1	1	1	1	1	1	1	1	1	1	1	1
15:23:28.550	1	1	1	1	1	1	1	1	1	1	1	1	1	1	1	1	1	1	1
15:23:29.501	1	1	1	1	1	1	1	1	1	1	1	1	1	1	1	1	1	1	1
15:23:30.451	1	1	1	1	1	1	1	1	1	1	1	1	1	1	1	1	1	1	1
15:23:31.488	1	1	1	1	1	1	1	1	1	1	1	1	1	1	1	1	1	1	1
15:23:32.438	1	1	1	1	1	1	1	1	1	1	1	1	1	1	1	1	1	1	1
15:23:33.475	1	1	1	1	1	1	1	1	1	1	1	1	1	1	1	1	1	1	1
15:23:34.426	1	1	1	1	1	1	1	1	1	1	1	1	1	1	1	1	1	1	1
15:23:35.376	1	1	1	1	1	1	1	1	1	1	1	1	1	1	1	1	1	1	1
15:23:36.326	1	1	1	1	1	1	1	1	1	1	1	1	1	1	1	1	1	1	1
15:23:37.363	1	1	1	1	1	1	1	1	1	1	1	1	1	1	1	1	1	1	1
15:23:38.314	1	1	1	1	1	1	1	1	1	1	1	1	1	1	1	1	1	1	1
15:23:39.264	1	1	1	1	1	1	1	1	1	1	1	1	1	1	1	1	1	1	1
15:23:40.301	1	1	1	1	1	1	1	1	1	1	1	1	1	1	1	1	1	1	1
15:23:41.251	1	1	1	1	1	1	1	1	1	1	1	1	1	1	1	1	1	1	1
15:23:42.202	1	1	1	1	1	1	1	1	1	1	1	1	1	1	1	1	1	1	1
15:23:43.238	1	1	1	1	1	1	1	1	1	1	1	1	1	1	1	1	1	1	1
15:23:44.189	1	1	1	1	1	1	1	1	1	1	1	1	1	1	1	1	1	1	1
15:23:45.139	1	1	1	1	1	1	1	1	1	1	1	1	1	1	1	1	1	1	1
15:23:46.090	1	1	1	1	1	1	1	1	1	1	1	1	1	1	1	1	1	1	1
15:23:47.126	1	1	1	1	1	1	1	1	1	1	1	1	1	1	1	1	1	1	1
15:23:48.077	1	1	1	1	1	1	1	1	1	1	1	1	1	1	1	1	1	1	1
15:23:49.027	1	1	1	1	1	1	1	1	1	1	1	1	1	1	1	1	1	1	1
15:23:50.064	1	1	1	1	1	1	1	1	1	1	1	1	1	1	1	1	1	1	1
15:23:51.014	1	1	1	1	1	1	1	1	1	1	1	1	1	1	1	1	1	1	1
15:23:51.965	1	1	1	1	1	1	1	1	1	1	1	1	1	1	1	1	1	1	1
15:23:53.002	1	1	1	1	1	1	1	1	1	1	1	1	1	1	1	1	1	1	1
15:23:53.952	1	1	1	1	1	1	1	1	1	1	1	1	1	1	1	1	1	1	1
15:23:54.902	1	1	1	1	1	1	1	1	1	1	1	1	1	1	1	1	1	1	1
15:23:55.853	1	1	1	1	1	1	1	1	1	1	1	1	1	1	1	1	1	1	1
15:23:56.890	1	1	1	1	1	1	1	1	1	1	1	1	1	1	1	1	1	1	1
15:23:57.840	1	1	1	1	1	1	1	1	1	1	1	1	1	1	1	1	1	1	1
15:23:58.790	1	1	1	1	1	1	1	1	1	1	1	1	1	1	1	1	1	1	1
15:23:59.827	1	1	1	1	1	1	1	1	1	1	1	1	1	1	1	1	1	1	1
15:25:15.341	1	1	1	1	1	1	1	1	1	1	1	1	1	1	1	1	1	1	1
15:25:16.291	1	1	1	1	1	1	1	1	1	1	1	1	1	1	1	1	1	1	1
15:25:17.242	1	1	1	1	1	1	1	1	1	1	1	1	1	1	1	1	1	1	1
15:25:18.278	1	1	1	1	1	1	1	1	1	1	1	1	1	1	1	1	1	1	1
15:25:19.229	1	1	1	1	1	1	1	1	1	1	1	1	1	1	1	1	1	1	1
15:25:20.179	1	1	1	1	1	1	1	1	1	1	1	1	1	1	1	1	1	1	1
15:25:21.216	1	1	1	1	1	1	1	1	1	1	1	1	1	1	1	1	1	1	1
15:25:22.166	1	1	1	1	1	1	1	1	1	1	1	1	1	1	1	1	1	1	1
15:25:23.117	1	1	1	1	1	1	1	1	1	1	1	1	1	1	1	1	1	1	1
15:25:24.067	1	1	1	1	1	1	1	1	1	1	1	1	1	1	1	1	1	1	1
15:25:25.104	1	1	1	1	1	1	1	1	1	1	1	1	1	1	1	1	1	1	1
15:25:26.054	1	1	1	1	1	1	1	1	1	1	1	1	1	1	1	1	1	1	1
15:25:27.005	1	1	1	1	1	1	1	1	1	1	1	1	1	1	1	1	1	1	1
15:25:28.042	1	1	1	1	1	1	1	1	1	1	1	1	1	1	1	1	1	1	1
15:25:28.992	1	1	1	1	1	1	1	1	1	1	1	1	1	1	1	1	1	1	1
15:25:29.942	1	1	1	1	1	1	1	1	1	1	1	1	1	1	1	1	1	1	1
15:25:30.979	1	1	1	1	1	1	1	1	1	1	1	1	1	1	1	1	1	1	1
15:25:31.930	1	1	1	1	1	1	1	1	1	1	1	1	1	1	1	1	1	1	1
15:25:32.880	1	1	1	1	1	1	1	1	1	1	1	1	1	1	1	1	1	1	1
15:25:33.830	1	1	1	1	1	1	1	1	1	1	1	1	1	1	1	1	1	1	1
15:25:34.867	1	1	1	1	1	1	1	1	1	1	1	1	1	1	1	1	1	1	1
15:25:35.818	1	1	1	1	1	1	1	1	1	1	1	1	1	1	1	1	1	1	1
15:25:36.768	1	1	1	1	1	1	1	1	1	1	1	1	1	1	1	1	1	1	1
15:25:37.805	1	1	1	1	1	1	1	1	1	1	1	1	1	1	1	1	1	1	1
15:25:38.755	1	1	1	1	1	1	1	1	1	1	1	1	1	1	1	1	1	1	1
15:25:39.706	1	1	1	1	1	1	1	1	1	1	1	1	1	1	1	1	1	1	1
15:25:40.656	1	1	1	1	1	1	1	1	1	1	1	1	1	1	1	1	1	1	1
15:25:41.693	1	1	1	1	1	1	1	1	1	1	1	1	1	1	1	1	1	1	1
15:25:42.643	1	1	1	1	1	1	1	1	1	1	1	1	1	1	1	1	1	1	1
15:25:43.594	1	1	1	1	1	1	1	1	1	1	1	1	1	1	1	1	1	1	1
15:25:44.630	1	1	1	1	1	1	1	1	1	1	1	1	1	1	1	1	1	1	1
15:25:45.581	1	1	1	1	1	1	1	1	1	1	1	1	1	1	1	1	1	1	1
15:25:46.531	1	1	1	1	1	1	1	1	1	1	1	1	1	1	1	1	1	1	1
15:25:47.568	1	1	1	1	1	1	1	1	1	1	1	1	1	1	1	1	1	1	1
15:25:48.518	1	1	1	1	1	1	1	1	1	1	1	1	1	1	1	1	1	1	1
15:25:49.469	1	1	1	1	1	1	1	1	1	1	1	1	1	1	1	1	1	1	1
15:25:50.506	1	1	1	1	1	1	1	1	1	1	1	1	1	1	1	1	1	1	1
15:25:51.456	1	1	1	1	1	1	1	1	1	1	1	1	1	1	1	1	1	1	1
15:25:52.406	1	1	1	1	1	1	1	1	1	1	1	1	1	1	1	1	1	1	1
15:25:53.357	1	1	1	1	1	1	1	1	1	1	1	1	1	1	1	1	1	1	1
15:25:54.394	1	1	1	1	1	1	1	1	1	1	1	1	1	1	1	1	1	1	1
15:25:55.344	1	1	1	1	1	1	1	1	1	1	1	1	1	1	1	1	1	1	1
15:25:56.294	1	1	1	1	1	1	1	1	1	1	1	1	1	1	1	1	1	1	1
15:25:57.331	1	1	1	1	1	1	1	1	1	1	1	1	1	1	1	1	1	1	1
15:25:58.282	1	1	1	1	1	1	1	1	1	1	1	1	1	1	1	1	1	1	1
15:25:59.232	1	1	1	1	1	1	1	1	1	1	1	1	1	1	1	1	1	1	1
15:26:00.269	1	1	1	1	1	1	1	1	1	1	1	1	1	1	1	1	1	1	1
15:27:16.042	1	1	1	1	1	1	1	1	1	1	1	1	1	1	1	1	1	1	1
15:27:16.992	1	1	1	1	1	1	1	1	1	1	1	1	1	1	1	1	1	1	1
15:27:17.942	1	1	1	1	1	1	1	1	1	1	1	1	1	1	1	1	1	1	1
15:27:18.893	1	1	1	1	1	1	1	1	1	1	1	1	1	1	1	1	1	1	1
15:27:19.930	1	1	1	1	1	1	1	1	1	1	1	1	1	1	1	1	1	1	1
15:27:20.880	1	1	1	1	1	1	1	1	1	1	1	1	1	1	1	1	1	1	1
15:27:21.830	1	1	1	1	1	1	1	1	1	1	1	1	1	1	1	1	1	1	1
15:27:22.867	1	1	1	1	1	1	1	1	1	1	1	1	1	1	1	1	1	1	1
15:27:23.818	1	1	1	1	1	1	1	1	1	1	1	1	1	1	1	1	1	1	1
15:27:24.768	1	1	1	1	1	1	1	1	1	1	1	1	1	1	1	1	1	1	1
15:27:25.805	1	1	1	1	1	1	1	1	1	1	1	1	1	1	1	1	1	1	1
15:27:26.755	1	1	1	1	1	1	1	1	1	1	1	1	1	1	1	1	1	1	1
15:27:27.706	1	1	1	1	1	1	1	1	1	1	1	1	1	1	1	1	1	1	1
15:27:28.656	1	1	1	1	1	1	1	1	1	1	1	1	1	1	1	1	1	1	1
15:27:29.693	1	1	1	1	1	1	1	1	1	1	1	1	1	1	1	1	1	1	1
15:27:30.643	1	1	1	1	1	1	1	1	1	1	1	1	1	1	1	1	1	1	1
15:27:31.594	1	1	1	1	1	1	1	1	1	1	1	1	1	1	1	1	1	1	1
15:27:32.630	1	1	1	1	1	1	1	1	1	1	1	1	1	1	1	1	1	1	1
15:27:33.581	1	1	1	1	1	1	1	1	1	1	1	1	1	1	1	1	1	1	1
15:27:34.531	1	1	1	1	1	1	1	1	1	1	1	1	1	1	1	1	1	1	1
15:27:35.568	1	1	1	1	1	1	1	1	1	1	1	1	1	1	1	1	1	1	1
15:27:36.518	1	1	1	1	1	1	1	1	1	1	1	1	1	1	1	1	1	1	1
15:27:37.469	1	1	1	1	1	1	1	1	1	1	1	1	1	1	1	1	1	1	1
15:27:38.419	1	1	1	1	1	1	1	1	1	1	1	1	1	1	1	1	1	1	1
15:27:39.456	1	1	1	1	1	1	1	1	1	1	1	1	1	1	1	1	1	1	1
15:27:40.406	1	1	1	1	1	1	1	1	1	1	1	1	1	1	1	1	1	1	1
15:27:41.443	1	1	1	1	1	1	1	1	1	1	1	1	1	1	1	1	1	1	1
15:27:42.394	1	1	1	1	1	1	1	1	1	1	1	1	1	1	1	1	1	1	1
15:27:43.344	1	1	1	1	1	1	1	1	1	1	1	1	1	1	1	1	1	1	1
15:27:44.294	1	1	1	1	1	1	1	1	1	1	1	1	1	1	1	1	1	1	1
15:27:45.331	1	1	1	1	1	1	1	1	1	1	1	1	1	1	1	1	1	1	1
15:27:46.282	1	1	1	1	1	1	1	1	1	1	1	1	1	1	1	1	1	1	1
15:27:47.232	1	1	1	1	1	1	1	1	1	1	1	1	1	1	1	1	1	1	1
15:27:48.269	1	1	1	1	1	1	1	1	1	1	1	1	1	1	1	1	1	1	1
15:27:49.219	1	1	1	1	1	1	1	1	1	1	1	1	1	1	1	1	1	1	1
15:27:50.170	1	1	1	1	1	1	1	1	1	1	1	1	1	1	1	1	1	1	1
15:27:51.120	1	1	1	1	1	1	1	1	1	1	1	1	1	1	1	1	1	1	1
15:27:52.157	1	1	1	1	1	1	1	1	1	1	1	1	1	1	1	1	1	1	1
15:27:53.107	1	1	1	1	1	1	1	1	1	1	1	1	1	1	1	1	1	1	1
15:27:54.058	1	1	1	1	1	1	1	1	1	1	1	1	1	1	1	1	1	1	1
15:27:55.094	1	1	1	1	1	1	1	1	1	1	1	1	1	1	1	1	1	1	1
15:27:56.045	1	1	1	1	1	1	1	1	1	1	1	1	1	1	1	1	1	1	1
15:27:56.995	1	1	1	1	1	1	1	1	1	1	1	1	1	1	1	1	1	1	1
15:27:58.032	1	1	1	1	1	1	1	1	1	1	1	1	1	1	1	1	1	1	1
15:27:58.982	1	1	1	1	1	1	1	1	1	1	1	1	1	1	1	1	1	1	1
15:27:59.933	1	1	1	1	1	1	1	1	1	1	1	1	1	1	1	1	1	1	1
15:29:15.446	1	1	1	1	1	1	1	1	1	1	1	1	1	1	1	1	1	1	1
15:29:16.397	1	1	1	1	1	1	1	1	1	1	1	1	1	1	1	1	1	1	1
15:29:17.347	1	1	1	1	1	1	1	1	1	1	1	1	1	1	1	1	1	1	1
15:29:18.384	1	1	1	1	1	1	1	1	1	1	1	1	1	1	1	1	1	1	1
15:29:19.334	1	1	1	1	1	1	1	1	1	1	1	1	1	1	1	1	1	1	1
15:29:20.285	1	1	1	1	1	1	1	1	1	1	1	1	1	1	1	1	1	1	1
15:29:21.322	1	1	1	1	1	1	1	1	1	1	1	1	1	1	1	1	1	1	1
15:29:22.272	1	1	1	1	1	1	1	1	1	1	1	1	1	1	1	1	1	1	1
15:29:23.222	1	1	1	1	1	1	1	1	1	1	1	1	1	1	1	1	1	1	1
15:29:24.259	1	1	1	1	1	1	1	1	1	1	1	1	1	1	1	1	1	1	1
15:29:25.210	1	1	1	1	1	1	1	1	1	1	1	1	1	1	1	1	1	1	1
15:29:26.160	1	1	1	1	1	1	1	1	1	1	1	1	1	1	1	1	1	1	1
15:29:27.197	1	1	1	1	1	1	1	1	1	1	1	1	1	1	1	1	1	1	1
15:29:28.147	1	1	1	1	1	1	1	1	1	1	1	1	1	1	1	1	1	1	1
15:29:29.098	1	1	1	1	1	1	1	1	1	1	1	1	1	1	1	1	1	1	1
15:29:30.048	1	1	1	1	1	1	1	1	1	1	1	1	1	1	1	1	1	1	1
15:29:31.085	1	1	1	1	1	1	1	1	1	1	1	1	1	1	1	1	1	1	1
15:29:32.035	1	1	1	1	1	1	1	1	1	1	1	1	1	1	1	1	1	1	1
15:29:32.986	1	1	1	1	1	1	1	1	1	1	1	1	1	1	1	1	1	1	1
15:29:34.022	1	1	1	1	1	1	1	1	1	1	1	1	1	1	1	1	1	1	1
15:29:34.973	1	1	1	1	1	1	1	1	1	1	1	1	1	1	1	1	1	1	1
15:29:35.923	1	1	1	1	1	1	1	1	1	1	1	1	1	1	1	1	1	1	1
15:29:36.960	1	1	1	1	1	1	1	1	1	1	1	1	1	1	1	1	1	1	1
15:29:37.910	1	1	1	1	1	1	1	1	1	1	1	1	1	1	1	1	1	1	1
15:29:38.861	1	1	1	1	1	1	1	1	1	1	1	1	1	1	1	1	1	1	1
15:29:39.811	1	1	1	1	1	1	1	1	1	1	1	1	1	1	1	1	1	1	1
15:29:40.848	1	1	1	1	1	1	1	1	1	1	1	1	1	1	1	1	1	1	1
15:29:41.798	1	1	1	1	1	1	1	1	1	1	1	1	1	1	1	1	1	1	1
15:29:42.749	1	1	1	1	1	1	1	1	1	1	1	1	1	1	1	1	1	1	1
15:29:43.786	1	1	1	1	1	1	1	1	1	1	1	1	1	1	1	1	1	1	1
15:29:44.736	1	1	1	1	1	1	1	1	1	1	1	1	1	1	1	1	1	1	1
15:29:45.686	1	1	1	1	1	1	1	1	1	1	1	1	1	1	1	1	1	1	1
15:29:46.723	1	1	1	1	1	1	1	1	1	1	1	1	1	1	1	1	1	1	1
15:29:47.674	1	1	1	1	1	1	1	1	1	1	1	1	1	1	1	1	1	1	1
15:29:48.624	1	1	1	1	1	1	1	1	1	1	1	1	1	1	1	1	1	1	1
15:29:49.574	1	1	1	1	1	1	1	1	1	1	1	1	1	1	1	1	1	1	1
15:29:50.611	1	1	1	1	1	1	1	1	1	1	1	1	1	1	1	1	1	1	1
15:29:51.562	1	1	1	1	1	1	1	1	1	1	1	1	1	1	1	1	1	1	1
15:29:52.512	1	1	1	1	1	1	1	1	1	1	1	1	1	1	1	1	1	1	1
15:29:53.549	1	1	1	1	1	1	1	1	1	1	1	1	1	1	1	1	1	1	1
15:29:54.499	1	1	1	1	1	1	1	1	1	1	1	1	1	1	1	1	1	1	1
15:29:55.450	1	1	1	1	1	1	1	1	1	1	1	1	1	1	1	1	1	1	1
15:29:56.486	1	1	1	1	1	1	1	1	1	1	1	1	1	1	1	1	1	1	1
15:29:57.437	1	1	1	1	1	1	1	1	1	1	1	1	1	1	1	1	1	1	1
15:29:58.387	1	1	1	1	1	1	1	1	1	1	1	1	1	1	1	1	1	1	1
15:29:59.338	1	1	1	1	1	1	1	1	1	1	1	1	1	1	1	1	1	1	1
15:30:00.374	1	1	1	1	1	1	1	1	1	1	1	1	1	1	1	1	1	1	1
15:31:15.974	1	1	1	1	1	1	1	1	1	1	1	1	1	1	1	1	1	1	1
15:31:17.011	1	1	1	1	1	1	1	1	1	1	1	1	1	1	1	1	1	1	1
15:31:17.962	1	1	1	1	1	1	1	1	1	1	1	1	1	1	1	1	1	1	1
15:31:18.912	1	1	1	1	1	1	1	1	1	1	1	1	1	1	1	1	1	1	1
15:31:19.949	1	1	1	1	1	1	1	1	1	1	1	1	1	1	1	1	1	1	1
15:31:20.899	1	1	1	1	1	1	1	1	1	1	1	1	1	1	1	1	1	1	1
15:31:21.850	1	1	1	1	1	1	1	1	1	1	1	1	1	1	1	1	1	1	1
15:31:22.886	1	1	1	1	1	1	1	1	1	1	1	1	1	1	1	1	1	1	1
15:31:23.837	1	1	1	1	1	1	1	1	1	1	1	1	1	1	1	1	1	1	1
15:31:24.787	1	1	1	1	1	1	1	1	1	1	1	1	1	1	1	1	1	1	1
15:31:25.824	1	1	1	1	1	1	1	1	1	1	1	1	1	1	1	1	1	1	1
15:31:26.774	1	1	1	1	1	1	1	1	1	1	1	1	1	1	1	1	1	1	1
15:31:27.725	1	1	1	1	1	1	1	1	1	1	1	1	1	1	1	1	1	1	1
15:31:28.675	1	1	1	1	1	1	1	1	1	1	1	1	1	1	1	1	1	1	1
15:31:29.712	1	1	1	1	1	1	1	1	1	1	1	1	1	1	1	1	1	1	1
15:31:30.662	1	1	1	1	1	1	1	1	1	1	1	1	1	1	1	1	1	1	1
15:31:31.613	1	1	1	1	1	1	1	1	1	1	1	1	1	1	1	1	1	1	1
15:31:32.650	1	1	1	1	1	1	1	1	1	1	1	1	1	1	1	1	1	1	1
15:31:33.600	1	1	1	1	1	1	1	1	1	1	1	1	1	1	1	1	1	1	1
15:31:34.550	1	1	1	1	1	1	1	1	1	1	1	1	1	1	1	1	1	1	1
15:31:35.587	1	1	1	1	1	1	1	1	1	1	1	1	1	1	1	1	1	1	1
15:31:36.538	1	1	1	1	1	1	1	1	1	1	1	1	1	1	1	1	1	1	1
15:31:37.488	1	1	1	1	1	1	1	1	1	1	1	1	1	1	1	1	1	1	1
15:31:38.438	1	1	1	1	1	1	1	1	1	1	1	1	1	1	1	1	1	1	1
15:31:39.475	1	1	1	1	1	1	1	1	1	1	1	1	1	1	1	1	1	1	1
15:31:40.426	1	1	1	1	1	1	1	1	1	1	1	1	1	1	1	1	1	1	1
15:31:41.376	1	1	1	1	1	1	1	1	1	1	1	1	1	1	1	1	1	1	1
15:31:42.413	1	1	1	1	1	1	1	1	1	1	1	1	1	1	1	1	1	1	1
15:31:43.363	1	1	1	1	1	1	1	1	1	1	1	1	1	1	1	1	1	1	1
15:31:44.314	1	1	1	1	1	1	1	1	1	1	1	1	1	1	1	1	1	1	1
15:31:45.350	1	1	1	1	1	1	1	1	1	1	1	1	1	1	1	1	1	1	1
15:31:46.301	1	1	1	1	1	1	1	1	1	1	1	1	1	1	1	1	1	1	1
15:31:47.251	1	1	1	1	1	1	1	1	1	1	1	1	1	1	1	1	1	1	1
15:31:48.202	1	1	1	1	1	1	1	1	1	1	1	1	1	1	1	1	1	1	1
15:31:49.238	1	1	1	1	1	1	1	1	1	1	1	1	1	1	1	1	1	1	1
15:31:50.189	1	1	1	1	1	1	1	1	1	1	1	1	1	1	1	1	1	1	1
15:31:51.139	1	1	1	1	1	1	1	1	1	1	1	1	1	1	1	1	1	1	1
15:31:52.176	1	1	1	1	1	1	1	1	1	1	1	1	1	1	1	1	1	1	1
15:31:53.126	1	1	1	1	1	1	1	1	1	1	1	1	1	1	1	1	1	1	1
15:31:54.077	1	1	1	1	1	1	1	1	1	1	1	1	1	1	1	1	1	1	1
15:31:55.114	1	1	1	1	1	1	1	1	1	1	1	1	1	1	1	1	1	1	1
15:31:56.064	1	1	1	1	1	1	1	1	1	1	1	1	1	1	1	1	1	1	1
15:31:57.014	1	1	1	1	1	1	1	1	1	1	1	1	1	1	1	1	1	1	1
15:31:58.051	1	1	1	1	1	1	1	1	1	1	1	1	1	1	1	1	1	1	1
15:31:59.002	1	1	1	1	1	1	1	1	1	1	1	1	1	1	1	1	1	1	1
15:31:59.952	1	1	1	1	1	1	1	1	1	1	1	1	1	1	1	1	1	1	1
15:32:00.902	1	1	1	1	1	1	1	1	1	1	1	1	1	1	1	1	1	1	1
15:33:15.811	1	1	1	1	1	1	1	1	1	1	1	1	1	1	1	1	1	1	1
15:33:16.848	1	1	1	1	1	1	1	1	1	1	1	1	1	1	1	1	1	1	1
15:33:17.798	1	1	1	1	1	1	1	1	1	1	1	1	1	1	1	1	1	1	1
15:33:18.749	1	1	1	1	1	1	1	1	1	1	1	1	1	1	1	1	1	1	1
15:33:19.786	1	1	1	1	1	1	1	1	1	1	1	1	1	1	1	1	1	1	1
15:33:20.736	1	1	1	1	1	1	1	1	1	1	1	1	1	1	1	1	1	1	1
15:33:21.686	1	1	1	1	1	1	1	1	1	1	1	1	1	1	1	1	1	1	1
15:33:22.637	1	1	1	1	1	1	1	1	1	1	1	1	1	1	1	1	1	1	1
15:33:23.674	1	1	1	1	1	1	1	1	1	1	1	1	1	1	1	1	1	1	1
15:33:24.624	1	1	1	1	1	1	1	1	1	1	1	1	1	1	1	1	1	1	1
15:33:25.574	1	1	1	1	1	1	1	1	1	1	1	1	1	1	1	1	1	1	1
15:33:26.611	1	1	1	1	1	1	1	1	1	1	1	1	1	1	1	1	1	1	1
15:33:27.562	1	1	1	1	1	1	1	1	1	1	1	1	1	1	1	1	1	1	1
15:33:28.512	1	1	1	1	1	1	1	1	1	1	1	1	1	1	1	1	1	1	1
15:33:29.549	1	1	1	1	1	1	1	1	1	1	1	1	1	1	1	1	1	1	1
15:33:30.499	1	1	1	1	1	1	1	1	1	1	1	1	1	1	1	1	1	1	1
15:33:31.450	1	1	1	1	1	1	1	1	1	1	1	1	1	1	1	1	1	1	1
15:33:32.486	1	1	1	1	1	1	1	1	1	1	1	1	1	1	1	1	1	1	1
15:33:33.437	1	1	1	1	1	1	1	1	1	1	1	1	1	1	1	1	1	1	1
15:33:34.387	1	1	1	1	1	1	1	1	1	1	1	1	1	1	1	1	1	1	1
15:33:35.424	1	1	1	1	1	1	1	1	1	1	1	1	1	1	1	1	1	1	1
15:33:36.374	1	1	1	1	1	1	1	1	1	1	1	1	1	1	1	1	1	1	1
15:33:37.325	1	1	1	1	1	1	1	1	1	1	1	1	1	1	1	1	1	1	1
15:33:38.275	1	1	1	1	1	1	1	1	1	1	1	1	1	1	1	1	1	1	1
15:33:39.312	1	1	1	1	1	1	1	1	1	1	1	1	1	1	1	1	1	1	1
15:33:40.262	1	1	1	1	1	1	1	1	1	1	1	1	1	1	1	1	1	1	1
15:33:41.213	1	1	1	1	1	1	1	1	1	1	1	1	1	1	1	1	1	1	1
15:33:42.250	1	1	1	1	1	1	1	1	1	1	1	1	1	1	1	1	1	1	1
15:33:43.200	1	1	1	1	1	1	1	1	1	1	1	1	1	1	1	1	1	1	1
15:33:44.150	1	1	1	1	1	1	1	1	1	1	1	1	1	1	1	1	1	1	1
15:33:45.101	1	1	1	1	1	1	1	1	1	1	1	1	1	1	1	1	1	1	1
15:33:46.138	1	1	1	1	1	1	1	1	1	1	1	1	1	1	1	1	1	1	1
15:33:47.088	1	1	1	1	1	1	1	1	1	1	1	1	1	1	1	1	1	1	1
15:33:48.038	1	1	1	1	1	1	1	1	1	1	1	1	1	1	1	1	1	1	1
15:33:49.075	1	1	1	1	1	1	1	1	1	1	1	1	1	1	1	1	1	1	1
15:33:50.026	1	1	1	1	1	1	1	1	1	1	1	1	1	1	1	1	1	1	1
15:33:50.976	1	1	1	1	1	1	1	1	1	1	1	1	1	1	1	1	1	1	1
15:33:52.013	1	1	1	1	1	1	1	1	1	1	1	1	1	1	1	1	1	1	1
15:33:52.963	1	1	1	1	1	1	1	1	1	1	1	1	1	1	1	1	1	1	1
15:33:53.914	1	1	1	1	1	1	1	1	1	1	1	1	1	1	1	1	1	1	1
15:33:54.864	1	1	1	1	1	1	1	1	1	1	1	1	1	1	1	1	1	1	1
15:33:55.901	1	1	1	1	1	1	1	1	1	1	1	1	1	1	1	1	1	1	1
15:33:56.851	1	1	1	1	1	1	1	1	1	1	1	1	1	1	1	1	1	1	1
15:33:57.802	1	1	1	1	1	1	1	1	1	1	1	1	1	1	1	1	1	1	1
15:33:58.838	1	1	1	1	1	1	1	1	1	1	1	1	1	1	1	1	1	1	1
15:33:59.789	1	1	1	1	1	1	1	1	1	1	1	1	1	1	1	1	1	1	1
15:35:15.734	1	1	1	1	1	1	1	1	1	1	1	1	1	1	1	1	1	1	1
15:35:16.685	1	1	1	1	1	1	1	1	1	1	1	1	1	1	1	1	1	1	1
15:35:17.722	1	1	1	1	1	1	1	1	1	1	1	1	1	1	1	1	1	1	1
15:35:18.672	1	1	1	1	1	1	1	1	1	1	1	1	1	1	1	1	1	1	1
15:35:19.622	1	1	1	1	1	1	1	1	1	1	1	1	1	1	1	1	1	1	1
15:35:20.659	1	1	1	1	1	1	1	1	1	1	1	1	1	1	1	1	1	1	1
15:35:21.610	1	1	1	1	1	1	1	1	1	1	1	1	1	1	1	1	1	1	1
15:35:22.560	1	1	1	1	1	1	1	1	1	1	1	1	1	1	1	1	1	1	1
15:35:23.510	1	1	1	1	1	1	1	1	1	1	1	1	1	1	1	1	1	1	1
15:35:24.547	1	1	1	1	1	1	1	1	1	1	1	1	1	1	1	1	1	1	1
15:35:25.498	1	1	1	1	1	1	1	1	1	1	1	1	1	1	1	1	1	1	1
15:35:26.448	1	1	1	1	1	1	1	1	1	1	1	1	1	1	1	1	1	1	1
15:35:27.485	1	1	1	1	1	1	1	1	1	1	1	1	1	1	1	1	1	1	1
15:35:28.435	1	1	1	1	1	1	1	1	1	1	1	1	1	1	1	1	1	1	1
15:35:29.386	1	1	1	1	1	1	1	1	1	1	1	1	1	1	1	1	1	1	1
15:35:30.422	1	1	1	1	1	1	1	1	1	1	1	1	1	1	1	1	1	1	1
15:35:31.373	1	1	1	1	1	1	1	1	1	1	1	1	1	1	1	1	1	1	1
15:35:32.323	1	1	1	1	1	1	1	1	1	1	1	1	1	1	1	1	1	1	1
15:35:33.274	1	1	1	1	1	1	1	1	1	1	1	1	1	1	1	1	1	1	1
15:35:34.310	1	1	1	1	1	1	1	1	1	1	1	1	1	1	1	1	1	1	1
15:35:35.261	1	1	1	1	1	1	1	1	1	1	1	1	1	1	1	1	1	1	1
15:35:36.211	1	1	1	1	1	1	1	1	1	1	1	1	1	1	1	1	1	1	1
15:35:37.248	1	1	1	1	1	1	1	1	1	1	1	1	1	1	1	1	1	1	1
15:35:38.198	1	1	1	1	1	1	1	1	1	1	1	1	1	1	1	1	1	1	1
15:35:39.149	1	1	1	1	1	1	1	1	1	1	1	1	1	1	1	1	1	1	1
15:35:40.186	1	1	1	1	1	1	1	1	1	1	1	1	1	1	1	1	1	1	1
15:35:41.136	1	1	1	1	1	1	1	1	1	1	1	1	1	1	1	1	1	1	1
15:35:42.086	1	1	1	1	1	1	1	1	1	1	1	1	1	1	1	1	1	1	1
15:35:43.123	1	1	1	1	1	1	1	1	1	1	1	1	1	1	1	1	1	1	1
15:35:44.074	1	1	1	1	1	1	1	1	1	1	1	1	1	1	1	1	1	1	1
15:35:45.024	1	1	1	1	1	1	1	1	1	1	1	1	1	1	1	1	1	1	1
15:35:45.974	1	1	1	1	1	1	1	1	1	1	1	1	1	1	1	1	1	1	1
15:35:47.011	1	1	1	1	1	1	1	1	1	1	1	1	1	1	1	1	1	1	1
15:35:47.962	1	1	1	1	1	1	1	1	1	1	1	1	1	1	1	1	1	1	1
15:35:48.912	1	1	1	1	1	1	1	1	1	1	1	1	1	1	1	1	1	1	1
15:35:49.949	1	1	1	1	1	1	1	1	1	1	1	1	1	1	1	1	1	1	1
15:35:50.899	1	1	1	1	1	1	1	1	1	1	1	1	1	1	1	1	1	1	1
15:35:51.850	1	1	1	1	1	1	1	1	1	1	1	1	1	1	1	1	1	1	1
15:35:52.886	1	1	1	1	1	1	1	1	1	1	1	1	1	1	1	1	1	1	1
15:35:53.837	1	1	1	1	1	1	1	1	1	1	1	1	1	1	1	1	1	1	1
15:35:54.787	1	1	1	1	1	1	1	1	1	1	1	1	1	1	1	1	1	1	1
15:35:55.824	1	1	1	1	1	1	1	1	1	1	1	1	1	1	1	1	1	1	1
15:35:56.774	1	1	1	1	1	1	1	1	1	1	1	1	1	1	1	1	1	1	1
15:35:57.725	1	1	1	1	1	1	1	1	1	1	1	1	1	1	1	1	1	1	1
15:35:58.675	1	1	1	1	1	1	1	1	1	1	1	1	1	1	1	1	1	1	1
15:35:59.712	1	1	1	1	1	1	1	1	1	1	1	1	1	1	1	1	1	1	1
15:37:15.139	1	1	1	1	1	1	1	1	1	1	1	1	1	1	1	1	1	1	1
15:37:16.090	1	1	1	1	1	1	1	1	1	1	1	1	1	1	1	1	1	1	1
15:37:17.126	1	1	1	1	1	1	1	1	1	1	1	1	1	1	1	1	1	1	1
15:37:18.077	1	1	1	1	1	1	1	1	1	1	1	1	1	1	1	1	1	1	1
15:37:19.027	1	1	1	1	1	1	1	1	1	1	1	1	1	1	1	1	1	1	1
15:37:19.978	1	1	1	1	1	1	1	1	1	1	1	1	1	1	1	1	1	1	1
15:37:21.014	1	1	1	1	1	1	1	1	1	1	1	1	1	1	1	1	1	1	1
15:37:21.965	1	1	1	1	1	1	1	1	1	1	1	1	1	1	1	1	1	1	1
15:37:22.915	1	1	1	1	1	1	1	1	1	1	1	1	1	1	1	1	1	1	1
15:37:23.952	1	1	1	1	1	1	1	1	1	1	1	1	1	1	1	1	1	1	1
15:37:24.902	1	1	1	1	1	1	1	1	1	1	1	1	1	1	1	1	1	1	1
15:37:25.853	1	1	1	1	1	1	1	1	1	1	1	1	1	1	1	1	1	1	1
15:37:26.803	1	1	1	1	1	1	1	1	1	1	1	1	1	1	1	1	1	1	1
15:37:27.840	1	1	1	1	1	1	1	1	1	1	1	1	1	1	1	1	1	1	1
15:37:28.790	1	1	1	1	1	1	1	1	1	1	1	1	1	1	1	1	1	1	1
15:37:29.741	1	1	1	1	1	1	1	1	1	1	1	1	1	1	1	1	1	1	1
15:37:30.778	1	1	1	1	1	1	1	1	1	1	1	1	1	1	1	1	1	1	1
15:37:31.728	1	1	1	1	1	1	1	1	1	1	1	1	1	1	1	1	1	1	1
15:37:32.678	1	1	1	1	1	1	1	1	1	1	1	1	1	1	1	1	1	1	1
15:37:33.715	1	1	1	1	1	1	1	1	1	1	1	1	1	1	1	1	1	1	1
15:37:34.666	1	1	1	1	1	1	1	1	1	1	1	1	1	1	1	1	1	1	1
15:37:35.616	1	1	1	1	1	1	1	1	1	1	1	1	1	1	1	1	1	1	1
15:37:36.566	1	1	1	1	1	1	1	1	1	1	1	1	1	1	1	1	1	1	1
15:37:37.603	1	1	1	1	1	1	1	1	1	1	1	1	1	1	1	1	1	1	1
15:37:38.554	1	1	1	1	1	1	1	1	1	1	1	1	1	1	1	1	1	1	1
15:37:39.504	1	1	1	1	1	1	1	1	1	1	1	1	1	1	1	1	1	1	1
15:37:40.541	1	1	1	1	1	1	1	1	1	1	1	1	1	1	1	1	1	1	1
15:37:41.491	1	1	1	1	1	1	1	1	1	1	1	1	1	1	1	1	1	1	1
15:37:42.442	1	1	1	1	1	1	1	1	1	1	1	1	1	1	1	1	1	1	1
15:37:43.478	1	1	1	1	1	1	1	1	1	1	1	1	1	1	1	1	1	1	1
15:37:44.429	1	1	1	1	1	1	1	1	1	1	1	1	1	1	1	1	1	1	1
15:37:45.379	1	1	1	1	1	1	1	1	1	1	1	1	1	1	1	1	1	1	1
15:37:46.416	1	1	1	1	1	1	1	1	1	1	1	1	1	1	1	1	1	1	1
15:37:47.366	1	1	1	1	1	1	1	1	1	1	1	1	1	1	1	1	1	1	1
15:37:48.317	1	1	1	1	1	1	1	1	1	1	1	1	1	1	1	1	1	1	1
15:37:49.267	1	1	1	1	1	1	1	1	1	1	1	1	1	1	1	1	1	1	1
15:37:50.304	1	1	1	1	1	1	1	1	1	1	1	1	1	1	1	1	1	1	1
15:37:51.254	1	1	1	1	1	1	1	1	1	1	1	1	1	1	1	1	1	1	1
15:37:52.205	1	1	1	1	1	1	1	1	1	1	1	1	1	1	1	1	1	1	1
15:37:53.242	1	1	1	1	1	1	1	1	1	1	1	1	1	1	1	1	1	1	1
15:37:54.192	1	1	1	1	1	1	1	1	1	1	1	1	1	1	1	1	1	1	1
15:37:55.142	1	1	1	1	1	1	1	1	1	1	1	1	1	1	1	1	1	1	1
15:37:56.179	1	1	1	1	1	1	1	1	1	1	1	1	1	1	1	1	1	1	1
15:37:57.130	1	1	1	1	1	1	1	1	1	1	1	1	1	1	1	1	1	1	1
15:37:58.080	1	1	1	1	1	1	1	1	1	1	1	1	1	1	1	1	1	1	1
15:37:59.117	1	1	1	1	1	1	1	1	1	1	1	1	1	1	1	1	1	1	1
15:38:00.067	1	1	1	1	1	1	1	1	1	1	1	1	1	1	1	1	1	1	1
15:39:15.581	1	1	1	1	1	1	1	1	1	1	1	1	1	1	1	1	1	1	1
15:39:16.531	1	1	1	1	1	1	1	1	1	1	1	1	1	1	1	1	1	1	1
15:39:17.482	1	1	1	1	1	1	1	1	1	1	1	1	1	1	1	1	1	1	1
15:39:18.518	1	1	1	1	1	1	1	1	1	1	1	1	1	1	1	1	1	1	1
15:39:19.469	1	1	1	1	1	1	1	1	1	1	1	1	1	1	1	1	1	1	1
15:39:20.419	1	1	1	1	1	1	1	1	1	1	1	1	1	1	1	1	1	1	1
15:39:21.370	1	1	1	1	1	1	1	1	1	1	1	1	1	1	1	1	1	1	1
15:39:22.406	1	1	1	1	1	1	1	1	1	1	1	1	1	1	1	1	1	1	1
15:39:23.357	1	1	1	1	1	1	1	1	1	1	1	1	1	1	1	1	1	1	1
15:39:24.307	1	1	1	1	1	1	1	1	1	1	1	1	1	1	1	1	1	1	1
15:39:25.344	1	1	1	1	1	1	1	1	1	1	1	1	1	1	1	1	1	1	1
15:39:26.294	1	1	1	1	1	1	1	1	1	1	1	1	1	1	1	1	1	1	1
15:39:27.245	1	1	1	1	1	1	1	1	1	1	1	1	1	1	1	1	1	1	1
15:39:28.282	1	1	1	1	1	1	1	1	1	1	1	1	1	1	1	1	1	1	1
15:39:29.232	1	1	1	1	1	1	1	1	1	1	1	1	1	1	1	1	1	1	1
15:39:30.182	1	1	1	1	1	1	1	1	1	1	1	1	1	1	1	1	1	1	1
15:39:31.133	1	1	1	1	1	1	1	1	1	1	1	1	1	1	1	1	1	1	1
15:39:32.170	1	1	1	1	1	1	1	1	1	1	1	1	1	1	1	1	1	1	1
15:39:33.120	1	1	1	1	1	1	1	1	1	1	1	1	1	1	1	1	1	1	1
15:39:34.070	1	1	1	1	1	1	1	1	1	1	1	1	1	1	1	1	1	1	1
15:39:35.107	1	1	1	1	1	1	1	1	1	1	1	1	1	1	1	1	1	1	1
15:39:36.058	1	1	1	1	1	1	1	1	1	1	1	1	1	1	1	1	1	1	1
15:39:37.008	1	1	1	1	1	1	1	1	1	1	1	1	1	1	1	1	1	1	1
15:39:37.958	1	1	1	1	1	1	1	1	1	1	1	1	1	1	1	1	1	1	1
15:39:38.995	1	1	1	1	1	1	1	1	1	1	1	1	1	1	1	1	1	1	1
15:39:39.946	1	1	1	1	1	1	1	1	1	1	1	1	1	1	1	1	1	1	1
15:39:40.896	1	1	1	1	1	1	1	1	1	1	1	1	1	1	1	1	1	1	1
15:39:41.933	1	1	1	1	1	1	1	1	1	1	1	1	1	1	1	1	1	1	1
15:39:42.883	1	1	1	1	1	1	1	1	1	1	1	1	1	1	1	1	1	1	1
15:39:43.834	1	1	1	1	1	1	1	1	1	1	1	1	1	1	1	1	1	1	1
15:39:44.870	1	1	1	1	1	1	1	1	1	1	1	1	1	1	1	1	1	1	1
15:39:45.821	1	1	1	1	1	1	1	1	1	1	1	1	1	1	1	1	1	1	1
15:39:46.771	1	1	1	1	1	1	1	1	1	1	1	1	1	1	1	1	1	1	1
15:39:47.808	1	1	1	1	1	1	1	1	1	1	1	1	1	1	1	1	1	1	1
15:39:48.758	1	1	1	1	1	1	1	1	1	1	1	1	1	1	1	1	1	1	1
15:39:49.709	1	1	1	1	1	1	1	1	1	1	1	1	1	1	1	1	1	1	1
15:39:50.746	1	1	1	1	1	1	1	1	1	1	1	1	1	1	1	1	1	1	1
15:39:51.696	1	1	1	1	1	1	1	1	1	1	1	1	1	1	1	1	1	1	1
15:39:52.646	1	1	1	1	1	1	1	1	1	1	1	1	1	1	1	1	1	1	1
15:39:53.597	1	1	1	1	1	1	1	1	1	1	1	1	1	1	1	1	1	1	1
15:39:54.634	1	1	1	1	1	1	1	1	1	1	1	1	1	1	1	1	1	1	1
15:39:55.584	1	1	1	1	1	1	1	1	1	1	1	1	1	1	1	1	1	1	1
15:39:56.534	1	1	1	1	1	1	1	1	1	1	1	1	1	1	1	1	1	1	1
15:39:57.485	1	1	1	1	1	1	1	1	1	1	1	1	1	1	1	1	1	1	1
15:39:58.522	1	1	1	1	1	1	1	1	1	1	1	1	1	1	1	1	1	1	1
15:39:59.472	1	1	1	1	1	1	1	1	1	1	1	1	1	1	1	1	1	1	1
15:40:00.422	1	1	1	1	1	1	1	1	1	1	1	1	1	1	1	1	1	1	1
15:41:15.850	1	1	1	1	1	1	1	1	1	1	1	1	1	1	1	1	1	1	1
15:41:16.800	1	1	1	1	1	1	1	1	1	1	1	1	1	1	1	1	1	1	1
15:41:17.750	1	1	1	1	1	1	1	1	1	1	1	1	1	1	1	1	1	1	1
15:41:18.787	1	1	1	1	1	1	1	1	1	1	1	1	1	1	1	1	1	1	1
15:41:19.738	1	1	1	1	1	1	1	1	1	1	1	1	1	1	1	1	1	1	1
15:41:20.688	1	1	1	1	1	1	1	1	1	1	1	1	1	1	1	1	1	1	1
15:41:21.725	1	1	1	1	1	1	1	1	1	1	1	1	1	1	1	1	1	1	1
15:41:22.675	1	1	1	1	1	1	1	1	1	1	1	1	1	1	1	1	1	1	1
15:41:23.626	1	1	1	1	1	1	1	1	1	1	1	1	1	1	1	1	1	1	1
15:41:24.662	1	1	1	1	1	1	1	1	1	1	1	1	1	1	1	1	1	1	1
15:41:25.613	1	1	1	1	1	1	1	1	1	1	1	1	1	1	1	1	1	1	1
15:41:26.563	1	1	1	1	1	1	1	1	1	1	1	1	1	1	1	1	1	1	1
15:41:27.600	1	1	1	1	1	1	1	1	1	1	1	1	1	1	1	1	1	1	1
15:41:28.550	1	1	1	1	1	1	1	1	1	1	1	1	1	1	1	1	1	1	1
15:41:29.501	1	1	1	1	1	1	1	1	1	1	1	1	1	1	1	1	1	1	1
15:41:30.451	1	1	1	1	1	1	1	1	1	1	1	1	1	1	1	1	1	1	1
15:41:31.488	1	1	1	1	1	1	1	1	1	1	1	1	1	1	1	1	1	1	1
15:41:32.438	1	1	1	1	1	1	1	1	1	1	1	1	1	1	1	1	1	1	1
15:41:33.389	1	1	1	1	1	1	1	1	1	1	1	1	1	1	1	1	1	1	1
15:41:34.426	1	1	1	1	1	1	1	1	1	1	1	1	1	1	1	1	1	1	1
15:41:35.376	1	1	1	1	1	1	1	1	1	1	1	1	1	1	1	1	1	1	1
15:41:36.326	1	1	1	1	1	1	1	1	1	1	1	1	1	1	1	1	1	1	1
15:41:37.363	1	1	1	1	1	1	1	1	1	1	1	1	1	1	1	1	1	1	1
15:41:38.314	1	1	1	1	1	1	1	1	1	1	1	1	1	1	1	1	1	1	1
15:41:39.264	1	1	1	1	1	1	1	1	1	1	1	1	1	1	1	1	1	1	1
15:41:40.214	1	1	1	1	1	1	1	1	1	1	1	1	1	1	1	1	1	1	1
15:41:41.251	1	1	1	1	1	1	1	1	1	1	1	1	1	1	1	1	1	1	1
15:41:42.202	1	1	1	1	1	1	1	1	1	1	1	1	1	1	1	1	1	1	1
15:41:43.152	1	1	1	1	1	1	1	1	1	1	1	1	1	1	1	1	1	1	1
15:41:44.189	1	1	1	1	1	1	1	1	1	1	1	1	1	1	1	1	1	1	1
15:41:45.139	1	1	1	1	1	1	1	1	1	1	1	1	1	1	1	1	1	1	1
15:41:46.090	1	1	1	1	1	1	1	1	1	1	1	1	1	1	1	1	1	1	1
15:41:47.126	1	1	1	1	1	1	1	1	1	1	1	1	1	1	1	1	1	1	1
15:41:48.077	1	1	1	1	1	1	1	1	1	1	1	1	1	1	1	1	1	1	1
15:41:49.027	1	1	1	1	1	1	1	1	1	1	1	1	1	1	1	1	1	1	1
15:41:49.978	1	1	1	1	1	1	1	1	1	1	1	1	1	1	1	1	1	1	1
15:41:51.014	1	1	1	1	1	1	1	1	1	1	1	1	1	1	1	1	1	1	1
15:41:51.965	1	1	1	1	1	1	1	1	1	1	1	1	1	1	1	1	1	1	1
15:41:52.915	1	1	1	1	1	1	1	1	1	1	1	1	1	1	1	1	1	1	1
15:41:53.952	1	1	1	1	1	1	1	1	1	1	1	1	1	1	1	1	1	1	1
15:41:54.902	1	1	1	1	1	1	1	1	1	1	1	1	1	1	1	1	1	1	1
15:41:55.853	1	1	1	1	1	1	1	1	1	1	1	1	1	1	1	1	1	1	1
15:41:56.890	1	1	1	1	1	1	1	1	1	1	1	1	1	1	1	1	1	1	1
15:41:57.840	1	1	1	1	1	1	1	1	1	1	1	1	1	1	1	1	1	1	1
15:41:58.790	1	1	1	1	1	1	1	1	1	1	1	1	1	1	1	1	1	1	1
15:41:59.741	1	1	1	1	1	1	1	1	1	1	1	1	1	1	1	1	1	1	1
15:43:15.514	1	1	1	1	1	1	1	1	1	1	1	1	1	1	1	1	1	1	1
15:43:16.464	1	1	1	1	1	1	1	1	1	1	1	1	1	1	1	1	1	1	1
15:43:17.501	1	1	1	1	1	1	1	1	1	1	1	1	1	1	1	1	1	1	1
15:43:18.451	1	1	1	1	1	1	1	1	1	1	1	1	1	1	1	1	1	1	1
15:43:19.402	1	1	1	1	1	1	1	1	1	1	1	1	1	1	1	1	1	1	1
15:43:20.352	1	1	1	1	1	1	1	1	1	1	1	1	1	1	1	1	1	1	1
15:43:21.389	1	1	1	1	1	1	1	1	1	1	1	1	1	1	1	1	1	1	1
15:43:22.339	1	1	1	1	1	1	1	1	1	1	1	1	1	1	1	1	1	1	1
15:43:23.290	1	1	1	1	1	1	1	1	1	1	1	1	1	1	1	1	1	1	1
15:43:24.326	1	1	1	1	1	1	1	1	1	1	1	1	1	1	1	1	1	1	1
15:43:25.277	1	1	1	1	1	1	1	1	1	1	1	1	1	1	1	1	1	1	1
15:43:26.227	1	1	1	1	1	1	1	1	1	1	1	1	1	1	1	1	1	1	1
15:43:27.264	1	1	1	1	1	1	1	1	1	1	1	1	1	1	1	1	1	1	1
15:43:28.214	1	1	1	1	1	1	1	1	1	1	1	1	1	1	1	1	1	1	1
15:43:29.165	1	1	1	1	1	1	1	1	1	1	1	1	1	1	1	1	1	1	1
15:43:30.115	1	1	1	1	1	1	1	1	1	1	1	1	1	1	1	1	1	1	1
15:43:31.152	1	1	1	1	1	1	1	1	1	1	1	1	1	1	1	1	1	1	1
15:43:32.102	1	1	1	1	1	1	1	1	1	1	1	1	1	1	1	1	1	1	1
15:43:33.053	1	1	1	1	1	1	1	1	1	1	1	1	1	1	1	1	1	1	1
15:43:34.090	1	1	1	1	1	1	1	1	1	1	1	1	1	1	1	1	1	1	1
15:43:35.040	1	1	1	1	1	1	1	1	1	1	1	1	1	1	1	1	1	1	1
15:43:35.990	1	1	1	1	1	1	1	1	1	1	1	1	1	1	1	1	1	1	1
15:43:37.027	1	1	1	1	1	1	1	1	1	1	1	1	1	1	1	1	1	1	1
15:43:37.978	1	1	1	1	1	1	1	1	1	1	1	1	1	1	1	1	1	1	1
15:43:38.928	1	1	1	1	1	1	1	1	1	1	1	1	1	1	1	1	1	1	1
15:43:39.965	1	1	1	1	1	1	1	1	1	1	1	1	1	1	1	1	1	1	1
15:43:40.915	1	1	1	1	1	1	1	1	1	1	1	1	1	1	1	1	1	1	1
15:43:41.866	1	1	1	1	1	1	1	1	1	1	1	1	1	1	1	1	1	1	1
15:43:42.902	1	1	1	1	1	1	1	1	1	1	1	1	1	1	1	1	1	1	1
15:43:43.853	1	1	1	1	1	1	1	1	1	1	1	1	1	1	1	1	1	1	1
15:43:44.803	1	1	1	1	1	1	1	1	1	1	1	1	1	1	1	1	1	1	1
15:43:45.754	1	1	1	1	1	1	1	1	1	1	1	1	1	1	1	1	1	1	1
15:43:46.790	1	1	1	1	1	1	1	1	1	1	1	1	1	1	1	1	1	1	1
15:43:47.741	1	1	1	1	1	1	1	1	1	1	1	1	1	1	1	1	1	1	1
15:43:48.691	1	1	1	1	1	1	1	1	1	1	1	1	1	1	1	1	1	1	1
15:43:49.728	1	1	1	1	1	1	1	1	1	1	1	1	1	1	1	1	1	1	1
15:43:50.678	1	1	1	1	1	1	1	1	1	1	1	1	1	1	1	1	1	1	1
15:43:51.629	1	1	1	1	1	1	1	1	1	1	1	1	1	1	1	1	1	1	1
15:43:52.579	1	1	1	1	1	1	1	1	1	1	1	1	1	1	1	1	1	1	1
15:43:53.616	1	1	1	1	1	1	1	1	1	1	1	1	1	1	1	1	1	1	1
15:43:54.566	1	1	1	1	1	1	1	1	1	1	1	1	1	1	1	1	1	1	1
15:43:55.517	1	1	1	1	1	1	1	1	1	1	1	1	1	1	1	1	1	1	1
15:43:56.554	1	1	1	1	1	1	1	1	1	1	1	1	1	1	1	1	1	1	1
15:43:57.504	1	1	1	1	1	1	1	1	1	1	1	1	1	1	1	1	1	1	1
15:43:58.454	1	1	1	1	1	1	1	1	1	1	1	1	1	1	1	1	1	1	1
15:43:59.491	1	1	1	1	1	1	1	1	1	1	1	1	1	1	1	1	1	1	1
15:45:15.091	1	1	1	1	1	1	1	1	1	1	1	1	1	1	1	1	1	1	1
15:45:16.042	1	1	1	1	1	1	1	1	1	1	1	1	1	1	1	1	1	1	1
15:45:16.992	1	1	1	1	1	1	1	1	1	1	1	1	1	1	1	1	1	1	1
15:45:18.029	1	1	1	1	1	1	1	1	1	1	1	1	1	1	1	1	1	1	1
15:45:18.979	1	1	1	1	1	1	1	1	1	1	1	1	1	1	1	1	1	1	1
15:45:19.930	1	1	1	1	1	1	1	1	1	1	1	1	1	1	1	1	1	1	1
15:45:20.880	1	1	1	1	1	1	1	1	1	1	1	1	1	1	1	1	1	1	1
15:45:21.917	1	1	1	1	1	1	1	1	1	1	1	1	1	1	1	1	1	1	1
15:45:22.867	1	1	1	1	1	1	1	1	1	1	1	1	1	1	1	1	1	1	1
15:45:23.818	1	1	1	1	1	1	1	1	1	1	1	1	1	1	1	1	1	1	1
15:45:24.854	1	1	1	1	1	1	1	1	1	1	1	1	1	1	1	1	1	1	1
15:45:25.805	1	1	1	1	1	1	1	1	1	1	1	1	1	1	1	1	1	1	1
15:45:26.755	1	1	1	1	1	1	1	1	1	1	1	1	1	1	1	1	1	1	1
15:45:27.792	1	1	1	1	1	1	1	1	1	1	1	1	1	1	1	1	1	1	1
15:45:28.742	1	1	1	1	1	1	1	1	1	1	1	1	1	1	1	1	1	1	1
15:45:29.693	1	1	1	1	1	1	1	1	1	1	1	1	1	1	1	1	1	1	1
15:45:30.643	1	1	1	1	1	1	1	1	1	1	1	1	1	1	1	1	1	1	1
15:45:31.680	1	1	1	1	1	1	1	1	1	1	1	1	1	1	1	1	1	1	1
15:45:32.630	1	1	1	1	1	1	1	1	1	1	1	1	1	1	1	1	1	1	1
15:45:33.581	1	1	1	1	1	1	1	1	1	1	1	1	1	1	1	1	1	1	1
15:45:34.618	1	1	1	1	1	1	1	1	1	1	1	1	1	1	1	1	1	1	1
15:45:35.568	1	1	1	1	1	1	1	1	1	1	1	1	1	1	1	1	1	1	1
15:45:36.518	1	1	1	1	1	1	1	1	1	1	1	1	1	1	1	1	1	1	1
15:45:37.555	1	1	1	1	1	1	1	1	1	1	1	1	1	1	1	1	1	1	1
15:45:38.506	1	1	1	1	1	1	1	1	1	1	1	1	1	1	1	1	1	1	1
15:45:39.456	1	1	1	1	1	1	1	1	1	1	1	1	1	1	1	1	1	1	1
15:45:40.493	1	1	1	1	1	1	1	1	1	1	1	1	1	1	1	1	1	1	1
15:45:41.443	1	1	1	1	1	1	1	1	1	1	1	1	1	1	1	1	1	1	1
15:45:42.394	1	1	1	1	1	1	1	1	1	1	1	1	1	1	1	1	1	1	1
15:45:43.344	1	1	1	1	1	1	1	1	1	1	1	1	1	1	1	1	1	1	1
15:45:44.381	1	1	1	1	1	1	1	1	1	1	1	1	1	1	1	1	1	1	1
15:45:45.331	1	1	1	1	1	1	1	1	1	1	1	1	1	1	1	1	1	1	1
15:45:46.282	1	1	1	1	1	1	1	1	1	1	1	1	1	1	1	1	1	1	1
15:45:47.318	1	1	1	1	1	1	1	1	1	1	1	1	1	1	1	1	1	1	1
15:45:48.269	1	1	1	1	1	1	1	1	1	1	1	1	1	1	1	1	1	1	1
15:45:49.219	1	1	1	1	1	1	1	1	1	1	1	1	1	1	1	1	1	1	1
15:45:50.256	1	1	1	1	1	1	1	1	1	1	1	1	1	1	1	1	1	1	1
15:45:51.206	1	1	1	1	1	1	1	1	1	1	1	1	1	1	1	1	1	1	1
15:45:52.157	1	1	1	1	1	1	1	1	1	1	1	1	1	1	1	1	1	1	1
15:45:53.107	1	1	1	1	1	1	1	1	1	1	1	1	1	1	1	1	1	1	1
15:45:54.144	1	1	1	1	1	1	1	1	1	1	1	1	1	1	1	1	1	1	1
15:45:55.094	1	1	1	1	1	1	1	1	1	1	1	1	1	1	1	1	1	1	1
15:45:56.045	1	1	1	1	1	1	1	1	1	1	1	1	1	1	1	1	1	1	1
15:45:57.082	1	1	1	1	1	1	1	1	1	1	1	1	1	1	1	1	1	1	1
15:45:58.032	1	1	1	1	1	1	1	1	1	1	1	1	1	1	1	1	1	1	1
15:45:58.982	1	1	1	1	1	1	1	1	1	1	1	1	1	1	1	1	1	1	1
15:46:00.019	1	1	1	1	1	1	1	1	1	1	1	1	1	1	1	1	1	1	1
15:47:15.706	1	1	1	1	1	1	1	1	1	1	1	1	1	1	1	1	1	1	1
15:47:16.742	1	1	1	1	1	1	1	1	1	1	1	1	1	1	1	1	1	1	1
15:47:17.693	1	1	1	1	1	1	1	1	1	1	1	1	1	1	1	1	1	1	1
15:47:18.643	1	1	1	1	1	1	1	1	1	1	1	1	1	1	1	1	1	1	1
15:47:19.680	1	1	1	1	1	1	1	1	1	1	1	1	1	1	1	1	1	1	1
15:47:20.630	1	1	1	1	1	1	1	1	1	1	1	1	1	1	1	1	1	1	1
15:47:21.581	1	1	1	1	1	1	1	1	1	1	1	1	1	1	1	1	1	1	1
15:47:22.618	1	1	1	1	1	1	1	1	1	1	1	1	1	1	1	1	1	1	1
15:47:23.568	1	1	1	1	1	1	1	1	1	1	1	1	1	1	1	1	1	1	1
15:47:24.518	1	1	1	1	1	1	1	1	1	1	1	1	1	1	1	1	1	1	1
15:47:25.555	1	1	1	1	1	1	1	1	1	1	1	1	1	1	1	1	1	1	1
15:47:26.506	1	1	1	1	1	1	1	1	1	1	1	1	1	1	1	1	1	1	1
15:47:27.456	1	1	1	1	1	1	1	1	1	1	1	1	1	1	1	1	1	1	1
15:47:28.406	1	1	1	1	1	1	1	1	1	1	1	1	1	1	1	1	1	1	1
15:47:29.443	1	1	1	1	1	1	1	1	1	1	1	1	1	1	1	1	1	1	1
15:47:30.394	1	1	1	1	1	1	1	1	1	1	1	1	1	1	1	1	1	1	1
15:47:31.344	1	1	1	1	1	1	1	1	1	1	1	1	1	1	1	1	1	1	1
15:47:32.294	1	1	1	1	1	1	1	1	1	1	1	1	1	1	1	1	1	1	1
15:47:33.331	1	1	1	1	1	1	1	1	1	1	1	1	1	1	1	1	1	1	1
15:47:34.282	1	1	1	1	1	1	1	1	1	1	1	1	1	1	1	1	1	1	1
15:47:35.232	1	1	1	1	1	1	1	1	1	1	1	1	1	1	1	1	1	1	1
15:47:36.269	1	1	1	1	1	1	1	1	1	1	1	1	1	1	1	1	1	1	1
15:47:37.219	1	1	1	1	1	1	1	1	1	1	1	1	1	1	1	1	1	1	1
15:47:38.170	1	1	1	1	1	1	1	1	1	1	1	1	1	1	1	1	1	1	1
15:47:39.206	1	1	1	1	1	1	1	1	1	1	1	1	1	1	1	1	1	1	1
15:47:40.157	1	1	1	1	1	1	1	1	1	1	1	1	1	1	1	1	1	1	1
15:47:41.107	1	1	1	1	1	1	1	1	1	1	1	1	1	1	1	1	1	1	1
15:47:42.144	1	1	1	1	1	1	1	1	1	1	1	1	1	1	1	1	1	1	1
15:47:43.094	1	1	1	1	1	1	1	1	1	1	1	1	1	1	1	1	1	1	1
15:47:44.045	1	1	1	1	1	1	1	1	1	1	1	1	1	1	1	1	1	1	1
15:47:45.082	1	1	1	1	1	1	1	1	1	1	1	1	1	1	1	1	1	1	1
15:47:46.032	1	1	1	1	1	1	1	1	1	1	1	1	1	1	1	1	1	1	1
15:47:46.982	1	1	1	1	1	1	1	1	1	1	1	1	1	1	1	1	1	1	1
15:47:47.933	1	1	1	1	1	1	1	1	1	1	1	1	1	1	1	1	1	1	1
15:47:48.970	1	1	1	1	1	1	1	1	1	1	1	1	1	1	1	1	1	1	1
15:47:49.920	1	1	1	1	1	1	1	1	1	1	1	1	1	1	1	1	1	1	1
15:47:50.870	1	1	1	1	1	1	1	1	1	1	1	1	1	1	1	1	1	1	1
15:47:51.907	1	1	1	1	1	1	1	1	1	1	1	1	1	1	1	1	1	1	1
15:47:52.858	1	1	1	1	1	1	1	1	1	1	1	1	1	1	1	1	1	1	1
15:47:53.808	1	1	1	1	1	1	1	1	1	1	1	1	1	1	1	1	1	1	1
15:47:54.845	1	1	1	1	1	1	1	1	1	1	1	1	1	1	1	1	1	1	1
15:47:55.795	1	1	1	1	1	1	1	1	1	1	1	1	1	1	1	1	1	1	1
15:47:56.746	1	1	1	1	1	1	1	1	1	1	1	1	1	1	1	1	1	1	1
15:47:57.782	1	1	1	1	1	1	1	1	1	1	1	1	1	1	1	1	1	1	1
15:47:58.733	1	1	1	1	1	1	1	1	1	1	1	1	1	1	1	1	1	1	1
15:47:59.683	1	1	1	1	1	1	1	1	1	1	1	1	1	1	1	1	1	1	1
15:49:15.110	1	1	1	1	1	1	1	1	1	1	1	1	1	1	1	1	1	1	1
15:49:16.147	1	1	1	1	1	1	1	1	1	1	1	1	1	1	1	1	1	1	1
15:49:17.098	1	1	1	1	1	1	1	1	1	1	1	1	1	1	1	1	1	1	1
15:49:18.048	1	1	1	1	1	1	1	1	1	1	1	1	1	1	1	1	1	1	1
15:49:18.998	1	1	1	1	1	1	1	1	1	1	1	1	1	1	1	1	1	1	1
15:49:20.035	1	1	1	1	1	1	1	1	1	1	1	1	1	1	1	1	1	1	1
15:49:20.986	1	1	1	1	1	1	1	1	1	1	1	1	1	1	1	1	1	1	1
15:49:21.936	1	1	1	1	1	1	1	1	1	1	1	1	1	1	1	1	1	1	1
15:49:22.973	1	1	1	1	1	1	1	1	1	1	1	1	1	1	1	1	1	1	1
15:49:23.923	1	1	1	1	1	1	1	1	1	1	1	1	1	1	1	1	1	1	1
15:49:24.874	1	1	1	1	1	1	1	1	1	1	1	1	1	1	1	1	1	1	1
15:49:25.910	1	1	1	1	1	1	1	1	1	1	1	1	1	1	1	1	1	1	1
15:49:26.861	1	1	1	1	1	1	1	1	1	1	1	1	1	1	1	1	1	1	1
15:49:27.811	1	1	1	1	1	1	1	1	1	1	1	1	1	1	1	1	1	1	1
15:49:28.848	1	1	1	1	1	1	1	1	1	1	1	1	1	1	1	1	1	1	1
15:49:29.798	1	1	1	1	1	1	1	1	1	1	1	1	1	1	1	1	1	1	1
15:49:30.749	1	1	1	1	1	1	1	1	1	1	1	1	1	1	1	1	1	1	1
15:49:31.699	1	1	1	1	1	1	1	1	1	1	1	1	1	1	1	1	1	1	1
15:49:32.736	1	1	1	1	1	1	1	1	1	1	1	1	1	1	1	1	1	1	1
15:49:33.686	1	1	1	1	1	1	1	1	1	1	1	1	1	1	1	1	1	1	1
15:49:34.637	1	1	1	1	1	1	1	1	1	1	1	1	1	1	1	1	1	1	1
15:49:35.674	1	1	1	1	1	1	1	1	1	1	1	1	1	1	1	1	1	1	1
15:49:36.624	1	1	1	1	1	1	1	1	1	1	1	1	1	1	1	1	1	1	1
15:49:37.574	1	1	1	1	1	1	1	1	1	1	1	1	1	1	1	1	1	1	1
15:49:38.611	1	1	1	1	1	1	1	1	1	1	1	1	1	1	1	1	1	1	1
15:49:39.562	1	1	1	1	1	1	1	1	1	1	1	1	1	1	1	1	1	1	1
15:49:40.512	1	1	1	1	1	1	1	1	1	1	1	1	1	1	1	1	1	1	1
15:49:41.549	1	1	1	1	1	1	1	1	1	1	1	1	1	1	1	1	1	1	1
15:49:42.499	1	1	1	1	1	1	1	1	1	1	1	1	1	1	1	1	1	1	1
15:49:43.450	1	1	1	1	1	1	1	1	1	1	1	1	1	1	1	1	1	1	1
15:49:44.400	1	1	1	1	1	1	1	1	1	1	1	1	1	1	1	1	1	1	1
15:49:45.437	1	1	1	1	1	1	1	1	1	1	1	1	1	1	1	1	1	1	1
15:49:46.387	1	1	1	1	1	1	1	1	1	1	1	1	1	1	1	1	1	1	1
15:49:47.338	1	1	1	1	1	1	1	1	1	1	1	1	1	1	1	1	1	1	1
15:49:48.374	1	1	1	1	1	1	1	1	1	1	1	1	1	1	1	1	1	1	1
15:49:49.325	1	1	1	1	1	1	1	1	1	1	1	1	1	1	1	1	1	1	1
15:49:50.275	1	1	1	1	1	1	1	1	1	1	1	1	1	1	1	1	1	1	1
15:49:51.226	1	1	1	1	1	1	1	1	1	1	1	1	1	1	1	1	1	1	1
15:49:52.262	1	1	1	1	1	1	1	1	1	1	1	1	1	1	1	1	1	1	1
15:49:53.213	1	1	1	1	1	1	1	1	1	1	1	1	1	1	1	1	1	1	1
15:49:54.163	1	1	1	1	1	1	1	1	1	1	1	1	1	1	1	1	1	1	1
15:49:55.200	1	1	1	1	1	1	1	1	1	1	1	1	1	1	1	1	1	1	1
15:49:56.150	1	1	1	1	1	1	1	1	1	1	1	1	1	1	1	1	1	1	1
15:49:57.101	1	1	1	1	1	1	1	1	1	1	1	1	1	1	1	1	1	1	1
15:49:58.138	1	1	1	1	1	1	1	1	1	1	1	1	1	1	1	1	1	1	1
15:49:59.088	1	1	1	1	1	1	1	1	1	1	1	1	1	1	1	1	1	1	1
15:50:00.038	1	1	1	1	1	1	1	1	1	1	1	1	1	1	1	1	1	1	1
15:51:15.984	1	1	1	1	1	1	1	1	1	1	1	1	1	1	1	1	1	1	1
15:51:16.934	1	1	1	1	1	1	1	1	1	1	1	1	1	1	1	1	1	1	1
15:51:17.971	1	1	1	1	1	1	1	1	1	1	1	1	1	1	1	1	1	1	1
15:51:18.922	1	1	1	1	1	1	1	1	1	1	1	1	1	1	1	1	1	1	1
15:51:19.872	1	1	1	1	1	1	1	1	1	1	1	1	1	1	1	1	1	1	1
15:51:20.909	1	1	1	1	1	1	1	1	1	1	1	1	1	1	1	1	1	1	1
15:51:21.859	1	1	1	1	1	1	1	1	1	1	1	1	1	1	1	1	1	1	1
15:51:22.810	1	1	1	1	1	1	1	1	1	1	1	1	1	1	1	1	1	1	1
15:51:23.760	1	1	1	1	1	1	1	1	1	1	1	1	1	1	1	1	1	1	1
15:51:24.797	1	1	1	1	1	1	1	1	1	1	1	1	1	1	1	1	1	1	1
15:51:25.747	1	1	1	1	1	1	1	1	1	1	1	1	1	1	1	1	1	1	1
15:51:26.698	1	1	1	1	1	1	1	1	1	1	1	1	1	1	1	1	1	1	1
15:51:27.734	1	1	1	1	1	1	1	1	1	1	1	1	1	1	1	1	1	1	1
15:51:28.685	1	1	1	1	1	1	1	1	1	1	1	1	1	1	1	1	1	1	1
15:51:29.635	1	1	1	1	1	1	1	1	1	1	1	1	1	1	1	1	1	1	1
15:51:30.672	1	1	1	1	1	1	1	1	1	1	1	1	1	1	1	1	1	1	1
15:51:31.622	1	1	1	1	1	1	1	1	1	1	1	1	1	1	1	1	1	1	1
15:51:32.573	1	1	1	1	1	1	1	1	1	1	1	1	1	1	1	1	1	1	1
15:51:33.523	1	1	1	1	1	1	1	1	1	1	1	1	1	1	1	1	1	1	1
15:51:34.560	1	1	1	1	1	1	1	1	1	1	1	1	1	1	1	1	1	1	1
15:51:35.510	1	1	1	1	1	1	1	1	1	1	1	1	1	1	1	1	1	1	1
15:51:36.461	1	1	1	1	1	1	1	1	1	1	1	1	1	1	1	1	1	1	1
15:51:37.498	1	1	1	1	1	1	1	1	1	1	1	1	1	1	1	1	1	1	1
15:51:38.448	1	1	1	1	1	1	1	1	1	1	1	1	1	1	1	1	1	1	1
15:51:39.398	1	1	1	1	1	1	1	1	1	1	1	1	1	1	1	1	1	1	1
15:51:40.435	1	1	1	1	1	1	1	1	1	1	1	1	1	1	1	1	1	1	1
15:51:41.386	1	1	1	1	1	1	1	1	1	1	1	1	1	1	1	1	1	1	1
15:51:42.336	1	1	1	1	1	1	1	1	1	1	1	1	1	1	1	1	1	1	1
15:51:43.286	1	1	1	1	1	1	1	1	1	1	1	1	1	1	1	1	1	1	1
15:51:44.323	1	1	1	1	1	1	1	1	1	1	1	1	1	1	1	1	1	1	1
15:51:45.274	1	1	1	1	1	1	1	1	1	1	1	1	1	1	1	1	1	1	1
15:51:46.224	1	1	1	1	1	1	1	1	1	1	1	1	1	1	1	1	1	1	1
15:51:47.261	1	1	1	1	1	1	1	1	1	1	1	1	1	1	1	1	1	1	1
15:51:48.211	1	1	1	1	1	1	1	1	1	1	1	1	1	1	1	1	1	1	1
15:51:49.162	1	1	1	1	1	1	1	1	1	1	1	1	1	1	1	1	1	1	1
15:51:50.198	1	1	1	1	1	1	1	1	1	1	1	1	1	1	1	1	1	1	1
15:51:51.149	1	1	1	1	1	1	1	1	1	1	1	1	1	1	1	1	1	1	1
15:51:52.099	1	1	1	1	1	1	1	1	1	1	1	1	1	1	1	1	1	1	1
15:51:53.136	1	1	1	1	1	1	1	1	1	1	1	1	1	1	1	1	1	1	1
15:51:54.086	1	1	1	1	1	1	1	1	1	1	1	1	1	1	1	1	1	1	1
15:51:55.037	1	1	1	1	1	1	1	1	1	1	1	1	1	1	1	1	1	1	1
15:51:55.987	1	1	1	1	1	1	1	1	1	1	1	1	1	1	1	1	1	1	1
15:51:57.024	1	1	1	1	1	1	1	1	1	1	1	1	1	1	1	1	1	1	1
15:51:57.974	1	1	1	1	1	1	1	1	1	1	1	1	1	1	1	1	1	1	1
15:51:58.925	1	1	1	1	1	1	1	1	1	1	1	1	1	1	1	1	1	1	1
15:51:59.962	1	1	1	1	1	1	1	1	1	1	1	1	1	1	1	1	1	1	1
15:53:15.302	1	1	1	1	1	1	1	1	1	1	1	1	1	1	1	1	1	1	1
15:53:16.339	1	1	1	1	1	1	1	1	1	1	1	1	1	1	1	1	1	1	1
15:53:17.290	1	1	1	1	1	1	1	1	1	1	1	1	1	1	1	1	1	1	1
15:53:18.240	1	1	1	1	1	1	1	1	1	1	1	1	1	1	1	1	1	1	1
15:53:19.190	1	1	1	1	1	1	1	1	1	1	1	1	1	1	1	1	1	1	1
15:53:20.227	1	1	1	1	1	1	1	1	1	1	1	1	1	1	1	1	1	1	1
15:53:21.178	1	1	1	1	1	1	1	1	1	1	1	1	1	1	1	1	1	1	1
15:53:22.128	1	1	1	1	1	1	1	1	1	1	1	1	1	1	1	1	1	1	1
15:53:23.165	1	1	1	1	1	1	1	1	1	1	1	1	1	1	1	1	1	1	1
15:53:24.115	1	1	1	1	1	1	1	1	1	1	1	1	1	1	1	1	1	1	1
15:53:25.066	1	1	1	1	1	1	1	1	1	1	1	1	1	1	1	1	1	1	1
15:53:26.016	1	1	1	1	1	1	1	1	1	1	1	1	1	1	1	1	1	1	1
15:53:27.053	1	1	1	1	1	1	1	1	1	1	1	1	1	1	1	1	1	1	1
15:53:28.003	1	1	1	1	1	1	1	1	1	1	1	1	1	1	1	1	1	1	1
15:53:28.954	1	1	1	1	1	1	1	1	1	1	1	1	1	1	1	1	1	1	1
15:53:29.990	1	1	1	1	1	1	1	1	1	1	1	1	1	1	1	1	1	1	1
15:53:30.941	1	1	1	1	1	1	1	1	1	1	1	1	1	1	1	1	1	1	1
15:53:31.891	1	1	1	1	1	1	1	1	1	1	1	1	1	1	1	1	1	1	1
15:53:32.928	1	1	1	1	1	1	1	1	1	1	1	1	1	1	1	1	1	1	1
15:53:33.878	1	1	1	1	1	1	1	1	1	1	1	1	1	1	1	1	1	1	1
15:53:34.829	1	1	1	1	1	1	1	1	1	1	1	1	1	1	1	1	1	1	1
15:53:35.779	1	1	1	1	1	1	1	1	1	1	1	1	1	1	1	1	1	1	1
15:53:36.816	1	1	1	1	1	1	1	1	1	1	1	1	1	1	1	1	1	1	1
15:53:37.766	1	1	1	1	1	1	1	1	1	1	1	1	1	1	1	1	1	1	1
15:53:38.803	1	1	1	1	1	1	1	1	1	1	1	1	1	1	1	1	1	1	1
15:53:39.754	1	1	1	1	1	1	1	1	1	1	1	1	1	1	1	1	1	1	1
15:53:40.704	1	1	1	1	1	1	1	1	1	1	1	1	1	1	1	1	1	1	1
15:53:41.654	1	1	1	1	1	1	1	1	1	1	1	1	1	1	1	1	1	1	1
15:53:42.691	1	1	1	1	1	1	1	1	1	1	1	1	1	1	1	1	1	1	1
15:53:43.642	1	1	1	1	1	1	1	1	1	1	1	1	1	1	1	1	1	1	1
15:53:44.592	1	1	1	1	1	1	1	1	1	1	1	1	1	1	1	1	1	1	1
15:53:45.629	1	1	1	1	1	1	1	1	1	1	1	1	1	1	1	1	1	1	1
15:53:46.579	1	1	1	1	1	1	1	1	1	1	1	1	1	1	1	1	1	1	1
15:53:47.530	1	1	1	1	1	1	1	1	1	1	1	1	1	1	1	1	1	1	1
15:53:48.566	1	1	1	1	1	1	1	1	1	1	1	1	1	1	1	1	1	1	1
15:53:49.517	1	1	1	1	1	1	1	1	1	1	1	1	1	1	1	1	1	1	1
15:53:50.467	1	1	1	1	1	1	1	1	1	1	1	1	1	1	1	1	1	1	1
15:53:51.418	1	1	1	1	1	1	1	1	1	1	1	1	1	1	1	1	1	1	1
15:53:52.454	1	1	1	1	1	1	1	1	1	1	1	1	1	1	1	1	1	1	1
15:53:53.405	1	1	1	1	1	1	1	1	1	1	1	1	1	1	1	1	1	1	1
15:53:54.355	1	1	1	1	1	1	1	1	1	1	1	1	1	1	1	1	1	1	1
15:53:55.392	1	1	1	1	1	1	1	1	1	1	1	1	1	1	1	1	1	1	1
15:53:56.342	1	1	1	1	1	1	1	1	1	1	1	1	1	1	1	1	1	1	1
15:53:57.293	1	1	1	1	1	1	1	1	1	1	1	1	1	1	1	1	1	1	1
15:53:58.330	1	1	1	1	1	1	1	1	1	1	1	1	1	1	1	1	1	1	1
15:53:59.280	1	1	1	1	1	1	1	1	1	1	1	1	1	1	1	1	1	1	1
15:55:15.226	1	1	1	1	1	1	1	1	1	1	1	1	1	1	1	1	1	1	1
15:55:16.262	1	1	1	1	1	1	1	1	1	1	1	1	1	1	1	1	1	1	1
15:55:17.213	1	1	1	1	1	1	1	1	1	1	1	1	1	1	1	1	1	1	1
15:55:18.163	1	1	1	1	1	1	1	1	1	1	1	1	1	1	1	1	1	1	1
15:55:19.114	1	1	1	1	1	1	1	1	1	1	1	1	1	1	1	1	1	1	1
15:55:20.150	1	1	1	1	1	1	1	1	1	1	1	1	1	1	1	1	1	1	1
15:55:21.101	1	1	1	1	1	1	1	1	1	1	1	1	1	1	1	1	1	1	1
15:55:22.051	1	1	1	1	1	1	1	1	1	1	1	1	1	1	1	1	1	1	1
15:55:23.088	1	1	1	1	1	1	1	1	1	1	1	1	1	1	1	1	1	1	1
15:55:24.038	1	1	1	1	1	1	1	1	1	1	1	1	1	1	1	1	1	1	1
15:55:24.989	1	1	1	1	1	1	1	1	1	1	1	1	1	1	1	1	1	1	1
15:55:26.026	1	1	1	1	1	1	1	1	1	1	1	1	1	1	1	1	1	1	1
15:55:26.976	1	1	1	1	1	1	1	1	1	1	1	1	1	1	1	1	1	1	1
15:55:27.926	1	1	1	1	1	1	1	1	1	1	1	1	1	1	1	1	1	1	1
15:55:28.877	1	1	1	1	1	1	1	1	1	1	1	1	1	1	1	1	1	1	1
15:55:29.914	1	1	1	1	1	1	1	1	1	1	1	1	1	1	1	1	1	1	1
15:55:30.864	1	1	1	1	1	1	1	1	1	1	1	1	1	1	1	1	1	1	1
15:55:31.814	1	1	1	1	1	1	1	1	1	1	1	1	1	1	1	1	1	1	1
15:55:32.851	1	1	1	1	1	1	1	1	1	1	1	1	1	1	1	1	1	1	1
15:55:33.802	1	1	1	1	1	1	1	1	1	1	1	1	1	1	1	1	1	1	1
15:55:34.752	1	1	1	1	1	1	1	1	1	1	1	1	1	1	1	1	1	1	1
15:55:35.789	1	1	1	1	1	1	1	1	1	1	1	1	1	1	1	1	1	1	1
15:55:36.739	1	1	1	1	1	1	1	1	1	1	1	1	1	1	1	1	1	1	1
15:55:37.690	1	1	1	1	1	1	1	1	1	1	1	1	1	1	1	1	1	1	1
15:55:38.640	1	1	1	1	1	1	1	1	1	1	1	1	1	1	1	1	1	1	1
15:55:39.677	1	1	1	1	1	1	1	1	1	1	1	1	1	1	1	1	1	1	1
15:55:40.627	1	1	1	1	1	1	1	1	1	1	1	1	1	1	1	1	1	1	1
15:55:41.578	1	1	1	1	1	1	1	1	1	1	1	1	1	1	1	1	1	1	1
15:55:42.614	1	1	1	1	1	1	1	1	1	1	1	1	1	1	1	1	1	1	1
15:55:43.565	1	1	1	1	1	1	1	1	1	1	1	1	1	1	1	1	1	1	1
15:55:44.515	1	1	1	1	1	1	1	1	1	1	1	1	1	1	1	1	1	1	1
15:55:45.552	1	1	1	1	1	1	1	1	1	1	1	1	1	1	1	1	1	1	1
15:55:46.502	1	1	1	1	1	1	1	1	1	1	1	1	1	1	1	1	1	1	1
15:55:47.453	1	1	1	1	1	1	1	1	1	1	1	1	1	1	1	1	1	1	1
15:55:48.403	1	1	1	1	1	1	1	1	1	1	1	1	1	1	1	1	1	1	1
15:55:49.440	1	1	1	1	1	1	1	1	1	1	1	1	1	1	1	1	1	1	1
15:55:50.390	1	1	1	1	1	1	1	1	1	1	1	1	1	1	1	1	1	1	1
15:55:51.341	1	1	1	1	1	1	1	1	1	1	1	1	1	1	1	1	1	1	1
15:55:52.378	1	1	1	1	1	1	1	1	1	1	1	1	1	1	1	1	1	1	1
15:55:53.328	1	1	1	1	1	1	1	1	1	1	1	1	1	1	1	1	1	1	1
15:55:54.278	1	1	1	1	1	1	1	1	1	1	1	1	1	1	1	1	1	1	1
15:55:55.315	1	1	1	1	1	1	1	1	1	1	1	1	1	1	1	1	1	1	1
15:55:56.266	1	1	1	1	1	1	1	1	1	1	1	1	1	1	1	1	1	1	1
15:55:57.216	1	1	1	1	1	1	1	1	1	1	1	1	1	1	1	1	1	1	1
15:55:58.253	1	1	1	1	1	1	1	1	1	1	1	1	1	1	1	1	1	1	1
15:55:59.203	1	1	1	1	1	1	1	1	1	1	1	1	1	1	1	1	1	1	1
15:56:00.154	1	1	1	1	1	1	1	1	1	1	1	1	1	1	1	1	1	1	1
15:57:15.667	1	1	1	1	1	1	1	1	1	1	1	1	1	1	1	1	1	1	1
15:57:16.618	1	1	1	1	1	1	1	1	1	1	1	1	1	1	1	1	1	1	1
15:57:17.654	1	1	1	1	1	1	1	1	1	1	1	1	1	1	1	1	1	1	1
15:57:18.605	1	1	1	1	1	1	1	1	1	1	1	1	1	1	1	1	1	1	1
15:57:19.555	1	1	1	1	1	1	1	1	1	1	1	1	1	1	1	1	1	1	1
15:57:20.592	1	1	1	1	1	1	1	1	1	1	1	1	1	1	1	1	1	1	1
15:57:21.542	1	1	1	1	1	1	1	1	1	1	1	1	1	1	1	1	1	1	1
15:57:22.493	1	1	1	1	1	1	1	1	1	1	1	1	1	1	1	1	1	1	1
15:57:23.443	1	1	1	1	1	1	1	1	1	1	1	1	1	1	1	1	1	1	1
15:57:24.480	1	1	1	1	1	1	1	1	1	1	1	1	1	1	1	1	1	1	1
15:57:25.430	1	1	1	1	1	1	1	1	1	1	1	1	1	1	1	1	1	1	1
15:57:26.381	1	1	1	1	1	1	1	1	1	1	1	1	1	1	1	1	1	1	1
15:57:27.418	1	1	1	1	1	1	1	1	1	1	1	1	1	1	1	1	1	1	1
15:57:28.368	1	1	1	1	1	1	1	1	1	1	1	1	1	1	1	1	1	1	1
15:57:29.318	1	1	1	1	1	1	1	1	1	1	1	1	1	1	1	1	1	1	1
15:57:30.355	1	1	1	1	1	1	1	1	1	1	1	1	1	1	1	1	1	1	1
15:57:31.306	1	1	1	1	1	1	1	1	1	1	1	1	1	1	1	1	1	1	1
15:57:32.256	1	1	1	1	1	1	1	1	1	1	1	1	1	1	1	1	1	1	1
15:57:33.206	1	1	1	1	1	1	1	1	1	1	1	1	1	1	1	1	1	1	1
15:57:34.243	1	1	1	1	1	1	1	1	1	1	1	1	1	1	1	1	1	1	1
15:57:35.194	1	1	1	1	1	1	1	1	1	1	1	1	1	1	1	1	1	1	1
15:57:36.144	1	1	1	1	1	1	1	1	1	1	1	1	1	1	1	1	1	1	1
15:57:37.181	1	1	1	1	1	1	1	1	1	1	1	1	1	1	1	1	1	1	1
15:57:38.131	1	1	1	1	1	1	1	1	1	1	1	1	1	1	1	1	1	1	1
15:57:39.082	1	1	1	1	1	1	1	1	1	1	1	1	1	1	1	1	1	1	1
15:57:40.032	1	1	1	1	1	1	1	1	1	1	1	1	1	1	1	1	1	1	1
15:57:41.069	1	1	1	1	1	1	1	1	1	1	1	1	1	1	1	1	1	1	1
15:57:42.019	1	1	1	1	1	1	1	1	1	1	1	1	1	1	1	1	1	1	1
15:57:42.970	1	1	1	1	1	1	1	1	1	1	1	1	1	1	1	1	1	1	1
15:57:44.006	1	1	1	1	1	1	1	1	1	1	1	1	1	1	1	1	1	1	1
15:57:44.957	1	1	1	1	1	1	1	1	1	1	1	1	1	1	1	1	1	1	1
15:57:45.907	1	1	1	1	1	1	1	1	1	1	1	1	1	1	1	1	1	1	1
15:57:46.944	1	1	1	1	1	1	1	1	1	1	1	1	1	1	1	1	1	1	1
15:57:47.894	1	1	1	1	1	1	1	1	1	1	1	1	1	1	1	1	1	1	1
15:57:48.845	1	1	1	1	1	1	1	1	1	1	1	1	1	1	1	1	1	1	1
15:57:49.882	1	1	1	1	1	1	1	1	1	1	1	1	1	1	1	1	1	1	1
15:57:50.832	1	1	1	1	1	1	1	1	1	1	1	1	1	1	1	1	1	1	1
15:57:51.782	1	1	1	1	1	1	1	1	1	1	1	1	1	1	1	1	1	1	1
15:57:52.819	1	1	1	1	1	1	1	1	1	1	1	1	1	1	1	1	1	1	1
15:57:53.770	1	1	1	1	1	1	1	1	1	1	1	1	1	1	1	1	1	1	1
15:57:54.720	1	1	1	1	1	1	1	1	1	1	1	1	1	1	1	1	1	1	1
15:57:55.670	1	1	1	1	1	1	1	1	1	1	1	1	1	1	1	1	1	1	1
15:57:56.707	1	1	1	1	1	1	1	1	1	1	1	1	1	1	1	1	1	1	1
15:57:57.658	1	1	1	1	1	1	1	1	1	1	1	1	1	1	1	1	1	1	1
15:57:58.608	1	1	1	1	1	1	1	1	1	1	1	1	1	1	1	1	1	1	1
15:57:59.645	1	1	1	1	1	1	1	1	1	1	1	1	1	1	1	1	1	1	1
15:59:15.504	1	1	1	1	1	1	1	1	1	1	1	1	1	1	1	1	1	1	1
15:59:16.454	1	1	1	1	1	1	1	1	1	1	1	1	1	1	1	1	1	1	1
15:59:17.491	1	1	1	1	1	1	1	1	1	1	1	1	1	1	1	1	1	1	1
15:59:18.442	1	1	1	1	1	1	1	1	1	1	1	1	1	1	1	1	1	1	1
15:59:19.392	1	1	1	1	1	1	1	1	1	1	1	1	1	1	1	1	1	1	1
15:59:20.429	1	1	1	1	1	1	1	1	1	1	1	1	1	1	1	1	1	1	1
15:59:21.379	1	1	1	1	1	1	1	1	1	1	1	1	1	1	1	1	1	1	1
15:59:22.330	1	1	1	1	1	1	1	1	1	1	1	1	1	1	1	1	1	1	1
15:59:23.366	1	1	1	1	1	1	1	1	1	1	1	1	1	1	1	1	1	1	1
15:59:24.317	1	1	1	1	1	1	1	1	1	1	1	1	1	1	1	1	1	1	1
15:59:25.267	1	1	1	1	1	1	1	1	1	1	1	1	1	1	1	1	1	1	1
15:59:26.218	1	1	1	1	1	1	1	1	1	1	1	1	1	1	1	1	1	1	1
15:59:27.254	1	1	1	1	1	1	1	1	1	1	1	1	1	1	1	1	1	1	1
15:59:28.205	1	1	1	1	1	1	1	1	1	1	1	1	1	1	1	1	1	1	1
15:59:29.155	1	1	1	1	1	1	1	1	1	1	1	1	1	1	1	1	1	1	1
15:59:30.192	1	1	1	1	1	1	1	1	1	1	1	1	1	1	1	1	1	1	1
15:59:31.142	1	1	1	1	1	1	1	1	1	1	1	1	1	1	1	1	1	1	1
15:59:32.093	1	1	1	1	1	1	1	1	1	1	1	1	1	1	1	1	1	1	1
15:59:33.043	1	1	1	1	1	1	1	1	1	1	1	1	1	1	1	1	1	1	1
15:59:34.080	1	1	1	1	1	1	1	1	1	1	1	1	1	1	1	1	1	1	1
15:59:35.030	1	1	1	1	1	1	1	1	1	1	1	1	1	1	1	1	1	1	1
15:59:35.981	1	1	1	1	1	1	1	1	1	1	1	1	1	1	1	1	1	1	1
15:59:37.018	1	1	1	1	1	1	1	1	1	1	1	1	1	1	1	1	1	1	1
15:59:37.968	1	1	1	1	1	1	1	1	1	1	1	1	1	1	1	1	1	1	1
15:59:38.918	1	1	1	1	1	1	1	1	1	1	1	1	1	1	1	1	1	1	1
15:59:39.955	1	1	1	1	1	1	1	1	1	1	1	1	1	1	1	1	1	1	1
15:59:40.906	1	1	1	1	1	1	1	1	1	1	1	1	1	1	1	1	1	1	1
15:59:41.856	1	1	1	1	1	1	1	1	1	1	1	1	1	1	1	1	1	1	1
15:59:42.806	1	1	1	1	1	1	1	1	1	1	1	1	1	1	1	1	1	1	1
15:59:43.843	1	1	1	1	1	1	1	1	1	1	1	1	1	1	1	1	1	1	1
15:59:44.794	1	1	1	1	1	1	1	1	1	1	1	1	1	1	1	1	1	1	1
15:59:45.744	1	1	1	1	1	1	1	1	1	1	1	1	1	1	1	1	1	1	1
15:59:46.781	1	1	1	1	1	1	1	1	1	1	1	1	1	1	1	1	1	1	1
15:59:47.731	1	1	1	1	1	1	1	1	1	1	1	1	1	1	1	1	1	1	1
15:59:48.682	1	1	1	1	1	1	1	1	1	1	1	1	1	1	1	1	1	1	1
15:59:49.718	1	1	1	1	1	1	1	1	1	1	1	1	1	1	1	1	1	1	1
15:59:50.669	1	1	1	1	1	1	1	1	1	1	1	1	1	1	1	1	1	1	1
15:59:51.619	1	1	1	1	1	1	1	1	1	1	1	1	1	1	1	1	1	1	1
15:59:52.656	1	1	1	1	1	1	1	1	1	1	1	1	1	1	1	1	1	1	1
15:59:53.606	1	1	1	1	1	1	1	1	1	1	1	1	1	1	1	1	1	1	1
15:59:54.557	1	1	1	1	1	1	1	1	1	1	1	1	1	1	1	1	1	1	1
15:59:55.594	1	1	1	1	1	1	1	1	1	1	1	1	1	1	1	1	1	1	1
15:59:56.544	1	1	1	1	1	1	1	1	1	1	1	1	1	1	1	1	1	1	1
15:59:57.494	1	1	1	1	1	1	1	1	1	1	1	1	1	1	1	1	1	1	1
15:59:58.445	1	1	1	1	1	1	1	1	1	1	1	1	1	1	1	1	1	1	1
15:59:59.482	1	1	1	1	1	1	1	1	1	1	1	1	1	1	1	1	1	1	1
[truncated: 4,948 more rows]
