# Supplementary material for: Measurements of spectral irradiance during the solar eclipse of 21 August 2017: reassessment of the effect of solar limb darkening and of changes in total ozone
Source: Copernicus journal article supplement (doi:10.5194/acp-2018-1048), 2018-11-02
Supplement: Supplementary file 1 [file acp-2018-1048-supplement.zip › Fig11c_Theory_Waldmeier.csv]

Time (UT)	306 (1)	306 (2)	315	320	340 (1)	340 (2)	380	395	412	443	490	532	555 (1)	555 (2)	665	875	940	1020	Geometric
14:35:14.593	1	1	1	1	1	1	1	1	1	1	1	1	1	1	1	1	1	1	1
14:35:15.580	1	1	1	1	1	1	1	1	1	1	1	1	1	1	1	1	1	1	1
14:35:16.552	1	1	1	1	1	1	1	1	1	1	1	1	1	1	1	1	1	1	1
14:35:17.530	1	1	1	1	1	1	1	1	1	1	1	1	1	1	1	1	1	1	1
14:35:18.510	1	1	1	1	1	1	1	1	1	1	1	1	1	1	1	1	1	1	1
14:35:19.489	1	1	1	1	1	1	1	1	1	1	1	1	1	1	1	1	1	1	1
14:35:20.460	1	1	1	1	1	1	1	1	1	1	1	1	1	1	1	1	1	1	1
14:35:21.440	1	1	1	1	1	1	1	1	1	1	1	1	1	1	1	1	1	1	1
14:35:22.415	1	1	1	1	1	1	1	1	1	1	1	1	1	1	1	1	1	1	1
14:35:23.398	1	1	1	1	1	1	1	1	1	1	1	1	1	1	1	1	1	1	1
14:35:24.363	1	1	1	1	1	1	1	1	1	1	1	1	1	1	1	1	1	1	1
14:35:25.344	1	1	1	1	1	1	1	1	1	1	1	1	1	1	1	1	1	1	1
14:35:26.325	1	1	1	1	1	1	1	1	1	1	1	1	1	1	1	1	1	1	1
14:35:27.295	1	1	1	1	1	1	1	1	1	1	1	1	1	1	1	1	1	1	1
14:35:28.276	1	1	1	1	1	1	1	1	1	1	1	1	1	1	1	1	1	1	1
14:35:29.245	1	1	1	1	1	1	1	1	1	1	1	1	1	1	1	1	1	1	1
14:35:30.219	1	1	1	1	1	1	1	1	1	1	1	1	1	1	1	1	1	1	1
14:35:31.201	1	1	1	1	1	1	1	1	1	1	1	1	1	1	1	1	1	1	1
14:35:32.177	1	1	1	1	1	1	1	1	1	1	1	1	1	1	1	1	1	1	1
14:35:33.143	1	1	1	1	1	1	1	1	1	1	1	1	1	1	1	1	1	1	1
14:35:34.126	1	1	1	1	1	1	1	1	1	1	1	1	1	1	1	1	1	1	1
14:35:35.103	1	1	1	1	1	1	1	1	1	1	1	1	1	1	1	1	1	1	1
14:35:36.093	1	1	1	1	1	1	1	1	1	1	1	1	1	1	1	1	1	1	1
14:35:37.055	1	1	1	1	1	1	1	1	1	1	1	1	1	1	1	1	1	1	1
14:35:38.047	1	1	1	1	1	1	1	1	1	1	1	1	1	1	1	1	1	1	1
14:35:39.012	1	1	1	1	1	1	1	1	1	1	1	1	1	1	1	1	1	1	1
14:35:39.993	1	1	1	1	1	1	1	1	1	1	1	1	1	1	1	1	1	1	1
14:35:40.963	1	1	1	1	1	1	1	1	1	1	1	1	1	1	1	1	1	1	1
14:35:41.951	1	1	1	1	1	1	1	1	1	1	1	1	1	1	1	1	1	1	1
14:35:42.914	1	1	1	1	1	1	1	1	1	1	1	1	1	1	1	1	1	1	1
14:35:43.905	1	1	1	1	1	1	1	1	1	1	1	1	1	1	1	1	1	1	1
14:35:44.879	1	1	1	1	1	1	1	1	1	1	1	1	1	1	1	1	1	1	1
14:35:45.844	1	1	1	1	1	1	1	1	1	1	1	1	1	1	1	1	1	1	1
14:35:46.835	1	1	1	1	1	1	1	1	1	1	1	1	1	1	1	1	1	1	1
14:35:47.805	1	1	1	1	1	1	1	1	1	1	1	1	1	1	1	1	1	1	1
14:35:48.782	1	1	1	1	1	1	1	1	1	1	1	1	1	1	1	1	1	1	1
14:35:49.762	1	1	1	1	1	1	1	1	1	1	1	1	1	1	1	1	1	1	1
14:35:50.733	1	1	1	1	1	1	1	1	1	1	1	1	1	1	1	1	1	1	1
14:35:51.714	1	1	1	1	1	1	1	1	1	1	1	1	1	1	1	1	1	1	1
14:35:52.688	1	1	1	1	1	1	1	1	1	1	1	1	1	1	1	1	1	1	1
14:35:53.666	1	1	1	1	1	1	1	1	1	1	1	1	1	1	1	1	1	1	1
14:35:54.644	1	1	1	1	1	1	1	1	1	1	1	1	1	1	1	1	1	1	1
14:35:55.617	1	1	1	1	1	1	1	1	1	1	1	1	1	1	1	1	1	1	1
14:35:56.588	1	1	1	1	1	1	1	1	1	1	1	1	1	1	1	1	1	1	1
14:35:57.564	1	1	1	1	1	1	1	1	1	1	1	1	1	1	1	1	1	1	1
14:35:58.543	1	1	1	1	1	1	1	1	1	1	1	1	1	1	1	1	1	1	1
14:35:59.518	1	1	1	1	1	1	1	1	1	1	1	1	1	1	1	1	1	1	1
14:36:00.504	1	1	1	1	1	1	1	1	1	1	1	1	1	1	1	1	1	1	1
14:37:15.753	1	1	1	1	1	1	1	1	1	1	1	1	1	1	1	1	1	1	1
14:37:16.737	1	1	1	1	1	1	1	1	1	1	1	1	1	1	1	1	1	1	1
14:37:17.713	1	1	1	1	1	1	1	1	1	1	1	1	1	1	1	1	1	1	1
14:37:18.694	1	1	1	1	1	1	1	1	1	1	1	1	1	1	1	1	1	1	1
14:37:19.656	1	1	1	1	1	1	1	1	1	1	1	1	1	1	1	1	1	1	1
14:37:20.643	1	1	1	1	1	1	1	1	1	1	1	1	1	1	1	1	1	1	1
14:37:21.618	1	1	1	1	1	1	1	1	1	1	1	1	1	1	1	1	1	1	1
14:37:22.592	1	1	1	1	1	1	1	1	1	1	1	1	1	1	1	1	1	1	1
14:37:23.577	1	1	1	1	1	1	1	1	1	1	1	1	1	1	1	1	1	1	1
14:37:24.560	1	1	1	1	1	1	1	1	1	1	1	1	1	1	1	1	1	1	1
14:37:25.524	1	1	1	1	1	1	1	1	1	1	1	1	1	1	1	1	1	1	1
14:37:26.511	1	1	1	1	1	1	1	1	1	1	1	1	1	1	1	1	1	1	1
14:37:27.475	1	1	1	1	1	1	1	1	1	1	1	1	1	1	1	1	1	1	1
14:37:28.460	1	1	1	1	1	1	1	1	1	1	1	1	1	1	1	1	1	1	1
14:37:29.438	1	1	1	1	1	1	1	1	1	1	1	1	1	1	1	1	1	1	1
14:37:30.407	1	1	1	1	1	1	1	1	1	1	1	1	1	1	1	1	1	1	1
14:37:31.384	1	1	1	1	1	1	1	1	1	1	1	1	1	1	1	1	1	1	1
14:37:32.365	1	1	1	1	1	1	1	1	1	1	1	1	1	1	1	1	1	1	1
14:37:33.339	1	1	1	1	1	1	1	1	1	1	1	1	1	1	1	1	1	1	1
14:37:34.319	1	1	1	1	1	1	1	1	1	1	1	1	1	1	1	1	1	1	1
14:37:35.293	1	1	1	1	1	1	1	1	1	1	1	1	1	1	1	1	1	1	1
14:37:36.261	1	1	1	1	1	1	1	1	1	1	1	1	1	1	1	1	1	1	1
14:37:37.240	1	1	1	1	1	1	1	1	1	1	1	1	1	1	1	1	1	1	1
14:37:38.224	1	1	1	1	1	1	1	1	1	1	1	1	1	1	1	1	1	1	1
14:37:39.199	1	1	1	1	1	1	1	1	1	1	1	1	1	1	1	1	1	1	1
14:37:40.168	1	1	1	1	1	1	1	1	1	1	1	1	1	1	1	1	1	1	1
14:37:41.154	1	1	1	1	1	1	1	1	1	1	1	1	1	1	1	1	1	1	1
14:37:42.123	1	1	1	1	1	1	1	1	1	1	1	1	1	1	1	1	1	1	1
14:37:43.105	1	1	1	1	1	1	1	1	1	1	1	1	1	1	1	1	1	1	1
14:37:44.077	1	1	1	1	1	1	1	1	1	1	1	1	1	1	1	1	1	1	1
14:37:45.056	1	1	1	1	1	1	1	1	1	1	1	1	1	1	1	1	1	1	1
14:37:46.024	1	1	1	1	1	1	1	1	1	1	1	1	1	1	1	1	1	1	1
14:37:47.012	1	1	1	1	1	1	1	1	1	1	1	1	1	1	1	1	1	1	1
14:37:47.981	1	1	1	1	1	1	1	1	1	1	1	1	1	1	1	1	1	1	1
14:37:48.967	1	1	1	1	1	1	1	1	1	1	1	1	1	1	1	1	1	1	1
14:37:49.936	1	1	1	1	1	1	1	1	1	1	1	1	1	1	1	1	1	1	1
14:37:50.911	1	1	1	1	1	1	1	1	1	1	1	1	1	1	1	1	1	1	1
14:37:51.891	1	1	1	1	1	1	1	1	1	1	1	1	1	1	1	1	1	1	1
14:37:52.861	1	1	1	1	1	1	1	1	1	1	1	1	1	1	1	1	1	1	1
14:37:53.846	1	1	1	1	1	1	1	1	1	1	1	1	1	1	1	1	1	1	1
14:37:54.817	1	1	1	1	1	1	1	1	1	1	1	1	1	1	1	1	1	1	1
14:37:55.803	1	1	1	1	1	1	1	1	1	1	1	1	1	1	1	1	1	1	1
14:37:56.771	1	1	1	1	1	1	1	1	1	1	1	1	1	1	1	1	1	1	1
14:37:57.757	1	1	1	1	1	1	1	1	1	1	1	1	1	1	1	1	1	1	1
14:37:58.733	1	1	1	1	1	1	1	1	1	1	1	1	1	1	1	1	1	1	1
14:37:59.712	1	1	1	1	1	1	1	1	1	1	1	1	1	1	1	1	1	1	1
14:39:15.491	1	1	1	1	1	1	1	1	1	1	1	1	1	1	1	1	1	1	1
14:39:16.478	1	1	1	1	1	1	1	1	1	1	1	1	1	1	1	1	1	1	1
14:39:17.451	1	1	1	1	1	1	1	1	1	1	1	1	1	1	1	1	1	1	1
14:39:18.430	1	1	1	1	1	1	1	1	1	1	1	1	1	1	1	1	1	1	1
14:39:19.400	1	1	1	1	1	1	1	1	1	1	1	1	1	1	1	1	1	1	1
14:39:20.384	1	1	1	1	1	1	1	1	1	1	1	1	1	1	1	1	1	1	1
14:39:21.359	1	1	1	1	1	1	1	1	1	1	1	1	1	1	1	1	1	1	1
14:39:22.329	1	1	1	1	1	1	1	1	1	1	1	1	1	1	1	1	1	1	1
14:39:23.314	1	1	1	1	1	1	1	1	1	1	1	1	1	1	1	1	1	1	1
14:39:24.293	1	1	1	1	1	1	1	1	1	1	1	1	1	1	1	1	1	1	1
14:39:25.264	1	1	1	1	1	1	1	1	1	1	1	1	1	1	1	1	1	1	1
14:39:26.250	1	1	1	1	1	1	1	1	1	1	1	1	1	1	1	1	1	1	1
14:39:27.222	1	1	1	1	1	1	1	1	1	1	1	1	1	1	1	1	1	1	1
14:39:28.201	1	1	1	1	1	1	1	1	1	1	1	1	1	1	1	1	1	1	1
14:39:29.176	1	1	1	1	1	1	1	1	1	1	1	1	1	1	1	1	1	1	1
14:39:30.155	1	1	1	1	1	1	1	1	1	1	1	1	1	1	1	1	1	1	1
14:39:31.119	1	1	1	1	1	1	1	1	1	1	1	1	1	1	1	1	1	1	1
14:39:32.106	1	1	1	1	1	1	1	1	1	1	1	1	1	1	1	1	1	1	1
14:39:33.077	1	1	1	1	1	1	1	1	1	1	1	1	1	1	1	1	1	1	1
14:39:34.057	1	1	1	1	1	1	1	1	1	1	1	1	1	1	1	1	1	1	1
14:39:35.035	1	1	1	1	1	1	1	1	1	1	1	1	1	1	1	1	1	1	1
14:39:36.006	1	1	1	1	1	1	1	1	1	1	1	1	1	1	1	1	1	1	1
14:39:36.977	1	1	1	1	1	1	1	1	1	1	1	1	1	1	1	1	1	1	1
14:39:37.956	1	1	1	1	1	1	1	1	1	1	1	1	1	1	1	1	1	1	1
14:39:38.942	1	1	1	1	1	1	1	1	1	1	1	1	1	1	1	1	1	1	1
14:39:39.908	1	1	1	1	1	1	1	1	1	1	1	1	1	1	1	1	1	1	1
14:39:40.894	1	1	1	1	1	1	1	1	1	1	1	1	1	1	1	1	1	1	1
14:39:41.865	1	1	1	1	1	1	1	1	1	1	1	1	1	1	1	1	1	1	1
14:39:42.850	1	1	1	1	1	1	1	1	1	1	1	1	1	1	1	1	1	1	1
14:39:43.820	1	1	1	1	1	1	1	1	1	1	1	1	1	1	1	1	1	1	1
14:39:44.794	1	1	1	1	1	1	1	1	1	1	1	1	1	1	1	1	1	1	1
14:39:45.779	1	1	1	1	1	1	1	1	1	1	1	1	1	1	1	1	1	1	1
14:39:46.751	1	1	1	1	1	1	1	1	1	1	1	1	1	1	1	1	1	1	1
14:39:47.722	1	1	1	1	1	1	1	1	1	1	1	1	1	1	1	1	1	1	1
14:39:48.694	1	1	1	1	1	1	1	1	1	1	1	1	1	1	1	1	1	1	1
14:39:49.685	1	1	1	1	1	1	1	1	1	1	1	1	1	1	1	1	1	1	1
14:39:50.655	1	1	1	1	1	1	1	1	1	1	1	1	1	1	1	1	1	1	1
14:39:51.640	1	1	1	1	1	1	1	1	1	1	1	1	1	1	1	1	1	1	1
14:39:52.604	1	1	1	1	1	1	1	1	1	1	1	1	1	1	1	1	1	1	1
14:39:53.590	1	1	1	1	1	1	1	1	1	1	1	1	1	1	1	1	1	1	1
14:39:54.560	1	1	1	1	1	1	1	1	1	1	1	1	1	1	1	1	1	1	1
14:39:55.540	1	1	1	1	1	1	1	1	1	1	1	1	1	1	1	1	1	1	1
14:39:56.516	1	1	1	1	1	1	1	1	1	1	1	1	1	1	1	1	1	1	1
14:39:57.486	1	1	1	1	1	1	1	1	1	1	1	1	1	1	1	1	1	1	1
14:39:58.475	1	1	1	1	1	1	1	1	1	1	1	1	1	1	1	1	1	1	1
14:39:59.446	1	1	1	1	1	1	1	1	1	1	1	1	1	1	1	1	1	1	1
14:40:00.419	1	1	1	1	1	1	1	1	1	1	1	1	1	1	1	1	1	1	1
14:41:15.878	1	1	1	1	1	1	1	1	1	1	1	1	1	1	1	1	1	1	1
14:41:16.857	1	1	1	1	1	1	1	1	1	1	1	1	1	1	1	1	1	1	1
14:41:17.836	1	1	1	1	1	1	1	1	1	1	1	1	1	1	1	1	1	1	1
14:41:18.805	1	1	1	1	1	1	1	1	1	1	1	1	1	1	1	1	1	1	1
14:41:19.795	1	1	1	1	1	1	1	1	1	1	1	1	1	1	1	1	1	1	1
14:41:20.765	1	1	1	1	1	1	1	1	1	1	1	1	1	1	1	1	1	1	1
14:41:21.735	1	1	1	1	1	1	1	1	1	1	1	1	1	1	1	1	1	1	1
14:41:22.722	1	1	1	1	1	1	1	1	1	1	1	1	1	1	1	1	1	1	1
14:41:23.688	1	1	1	1	1	1	1	1	1	1	1	1	1	1	1	1	1	1	1
14:41:24.674	1	1	1	1	1	1	1	1	1	1	1	1	1	1	1	1	1	1	1
14:41:25.649	1	1	1	1	1	1	1	1	1	1	1	1	1	1	1	1	1	1	1
14:41:26.623	1	1	1	1	1	1	1	1	1	1	1	1	1	1	1	1	1	1	1
14:41:27.593	1	1	1	1	1	1	1	1	1	1	1	1	1	1	1	1	1	1	1
14:41:28.580	1	1	1	1	1	1	1	1	1	1	1	1	1	1	1	1	1	1	1
14:41:29.560	1	1	1	1	1	1	1	1	1	1	1	1	1	1	1	1	1	1	1
14:41:30.524	1	1	1	1	1	1	1	1	1	1	1	1	1	1	1	1	1	1	1
14:41:31.500	1	1	1	1	1	1	1	1	1	1	1	1	1	1	1	1	1	1	1
14:41:32.476	1	1	1	1	1	1	1	1	1	1	1	1	1	1	1	1	1	1	1
14:41:33.465	1	1	1	1	1	1	1	1	1	1	1	1	1	1	1	1	1	1	1
14:41:34.434	1	1	1	1	1	1	1	1	1	1	1	1	1	1	1	1	1	1	1
14:41:35.410	1	1	1	1	1	1	1	1	1	1	1	1	1	1	1	1	1	1	1
14:41:36.385	1	1	1	1	1	1	1	1	1	1	1	1	1	1	1	1	1	1	1
14:41:37.366	1	1	1	1	1	1	1	1	1	1	1	1	1	1	1	1	1	1	1
14:41:38.332	1	1	1	1	1	1	1	1	1	1	1	1	1	1	1	1	1	1	1
14:41:39.325	1	1	1	1	1	1	1	1	1	1	1	1	1	1	1	1	1	1	1
14:41:40.288	1	1	1	1	1	1	1	1	1	1	1	1	1	1	1	1	1	1	1
14:41:41.277	1	1	1	1	1	1	1	1	1	1	1	1	1	1	1	1	1	1	1
14:41:42.248	1	1	1	1	1	1	1	1	1	1	1	1	1	1	1	1	1	1	1
14:41:43.224	1	1	1	1	1	1	1	1	1	1	1	1	1	1	1	1	1	1	1
14:41:44.199	1	1	1	1	1	1	1	1	1	1	1	1	1	1	1	1	1	1	1
14:41:45.174	1	1	1	1	1	1	1	1	1	1	1	1	1	1	1	1	1	1	1
14:41:46.145	1	1	1	1	1	1	1	1	1	1	1	1	1	1	1	1	1	1	1
14:41:47.124	1	1	1	1	1	1	1	1	1	1	1	1	1	1	1	1	1	1	1
14:41:48.098	1	1	1	1	1	1	1	1	1	1	1	1	1	1	1	1	1	1	1
14:41:49.083	1	1	1	1	1	1	1	1	1	1	1	1	1	1	1	1	1	1	1
14:41:50.062	1	1	1	1	1	1	1	1	1	1	1	1	1	1	1	1	1	1	1
14:41:51.032	1	1	1	1	1	1	1	1	1	1	1	1	1	1	1	1	1	1	1
14:41:52.018	1	1	1	1	1	1	1	1	1	1	1	1	1	1	1	1	1	1	1
14:41:52.983	1	1	1	1	1	1	1	1	1	1	1	1	1	1	1	1	1	1	1
14:41:53.968	1	1	1	1	1	1	1	1	1	1	1	1	1	1	1	1	1	1	1
14:41:54.939	1	1	1	1	1	1	1	1	1	1	1	1	1	1	1	1	1	1	1
14:41:55.914	1	1	1	1	1	1	1	1	1	1	1	1	1	1	1	1	1	1	1
14:41:56.898	1	1	1	1	1	1	1	1	1	1	1	1	1	1	1	1	1	1	1
14:41:57.873	1	1	1	1	1	1	1	1	1	1	1	1	1	1	1	1	1	1	1
14:41:58.845	1	1	1	1	1	1	1	1	1	1	1	1	1	1	1	1	1	1	1
14:41:59.831	1	1	1	1	1	1	1	1	1	1	1	1	1	1	1	1	1	1	1
14:43:15.684	1	1	1	1	1	1	1	1	1	1	1	1	1	1	1	1	1	1	1
14:43:16.660	1	1	1	1	1	1	1	1	1	1	1	1	1	1	1	1	1	1	1
14:43:17.637	1	1	1	1	1	1	1	1	1	1	1	1	1	1	1	1	1	1	1
14:43:18.620	1	1	1	1	1	1	1	1	1	1	1	1	1	1	1	1	1	1	1
14:43:19.590	1	1	1	1	1	1	1	1	1	1	1	1	1	1	1	1	1	1	1
14:43:20.565	1	1	1	1	1	1	1	1	1	1	1	1	1	1	1	1	1	1	1
14:43:21.540	1	1	1	1	1	1	1	1	1	1	1	1	1	1	1	1	1	1	1
14:43:22.521	1	1	1	1	1	1	1	1	1	1	1	1	1	1	1	1	1	1	1
14:43:23.492	1	1	1	1	1	1	1	1	1	1	1	1	1	1	1	1	1	1	1
14:43:24.480	1	1	1	1	1	1	1	1	1	1	1	1	1	1	1	1	1	1	1
14:43:25.456	1	1	1	1	1	1	1	1	1	1	1	1	1	1	1	1	1	1	1
14:43:26.424	1	1	1	1	1	1	1	1	1	1	1	1	1	1	1	1	1	1	1
14:43:27.406	1	1	1	1	1	1	1	1	1	1	1	1	1	1	1	1	1	1	1
14:43:28.380	1	1	1	1	1	1	1	1	1	1	1	1	1	1	1	1	1	1	1
14:43:29.353	1	1	1	1	1	1	1	1	1	1	1	1	1	1	1	1	1	1	1
14:43:30.332	1	1	1	1	1	1	1	1	1	1	1	1	1	1	1	1	1	1	1
14:43:31.307	1	1	1	1	1	1	1	1	1	1	1	1	1	1	1	1	1	1	1
14:43:32.288	1	1	1	1	1	1	1	1	1	1	1	1	1	1	1	1	1	1	1
14:43:33.263	1	1	1	1	1	1	1	1	1	1	1	1	1	1	1	1	1	1	1
14:43:34.239	1	1	1	1	1	1	1	1	1	1	1	1	1	1	1	1	1	1	1
14:43:35.206	1	1	1	1	1	1	1	1	1	1	1	1	1	1	1	1	1	1	1
14:43:36.198	1	1	1	1	1	1	1	1	1	1	1	1	1	1	1	1	1	1	1
14:43:37.158	1	1	1	1	1	1	1	1	1	1	1	1	1	1	1	1	1	1	1
14:43:38.144	1	1	1	1	1	1	1	1	1	1	1	1	1	1	1	1	1	1	1
14:43:39.123	1	1	1	1	1	1	1	1	1	1	1	1	1	1	1	1	1	1	1
14:43:40.094	1	1	1	1	1	1	1	1	1	1	1	1	1	1	1	1	1	1	1
14:43:41.074	1	1	1	1	1	1	1	1	1	1	1	1	1	1	1	1	1	1	1
14:43:42.053	1	1	1	1	1	1	1	1	1	1	1	1	1	1	1	1	1	1	1
14:43:43.032	1	1	1	1	1	1	1	1	1	1	1	1	1	1	1	1	1	1	1
14:43:44.007	1	1	1	1	1	1	1	1	1	1	1	1	1	1	1	1	1	1	1
14:43:44.980	1	1	1	1	1	1	1	1	1	1	1	1	1	1	1	1	1	1	1
14:43:45.958	1	1	1	1	1	1	1	1	1	1	1	1	1	1	1	1	1	1	1
14:43:46.929	1	1	1	1	1	1	1	1	1	1	1	1	1	1	1	1	1	1	1
14:43:47.909	1	1	1	1	1	1	1	1	1	1	1	1	1	1	1	1	1	1	1
14:43:48.895	1	1	1	1	1	1	1	1	1	1	1	1	1	1	1	1	1	1	1
14:43:49.854	1	1	1	1	1	1	1	1	1	1	1	1	1	1	1	1	1	1	1
14:43:50.834	1	1	1	1	1	1	1	1	1	1	1	1	1	1	1	1	1	1	1
14:43:51.819	1	1	1	1	1	1	1	1	1	1	1	1	1	1	1	1	1	1	1
14:43:52.790	1	1	1	1	1	1	1	1	1	1	1	1	1	1	1	1	1	1	1
14:43:53.760	1	1	1	1	1	1	1	1	1	1	1	1	1	1	1	1	1	1	1
14:43:54.745	1	1	1	1	1	1	1	1	1	1	1	1	1	1	1	1	1	1	1
14:43:55.726	1	1	1	1	1	1	1	1	1	1	1	1	1	1	1	1	1	1	1
14:43:56.703	1	1	1	1	1	1	1	1	1	1	1	1	1	1	1	1	1	1	1
14:43:57.673	1	1	1	1	1	1	1	1	1	1	1	1	1	1	1	1	1	1	1
14:43:58.648	1	1	1	1	1	1	1	1	1	1	1	1	1	1	1	1	1	1	1
14:43:59.628	1	1	1	1	1	1	1	1	1	1	1	1	1	1	1	1	1	1	1
14:45:15.343	1	1	1	1	1	1	1	1	1	1	1	1	1	1	1	1	1	1	1
14:45:16.333	1	1	1	1	1	1	1	1	1	1	1	1	1	1	1	1	1	1	1
14:45:17.303	1	1	1	1	1	1	1	1	1	1	1	1	1	1	1	1	1	1	1
14:45:18.275	1	1	1	1	1	1	1	1	1	1	1	1	1	1	1	1	1	1	1
14:45:19.244	1	1	1	1	1	1	1	1	1	1	1	1	1	1	1	1	1	1	1
14:45:20.235	1	1	1	1	1	1	1	1	1	1	1	1	1	1	1	1	1	1	1
14:45:21.203	1	1	1	1	1	1	1	1	1	1	1	1	1	1	1	1	1	1	1
14:45:22.189	1	1	1	1	1	1	1	1	1	1	1	1	1	1	1	1	1	1	1
14:45:23.159	1	1	1	1	1	1	1	1	1	1	1	1	1	1	1	1	1	1	1
14:45:24.135	1	1	1	1	1	1	1	1	1	1	1	1	1	1	1	1	1	1	1
14:45:25.104	1	1	1	1	1	1	1	1	1	1	1	1	1	1	1	1	1	1	1
14:45:26.094	1	1	1	1	1	1	1	1	1	1	1	1	1	1	1	1	1	1	1
14:45:27.061	1	1	1	1	1	1	1	1	1	1	1	1	1	1	1	1	1	1	1
14:45:28.046	1	1	1	1	1	1	1	1	1	1	1	1	1	1	1	1	1	1	1
14:45:29.024	1	1	1	1	1	1	1	1	1	1	1	1	1	1	1	1	1	1	1
14:45:29.999	1	1	1	1	1	1	1	1	1	1	1	1	1	1	1	1	1	1	1
14:45:30.970	1	1	1	1	1	1	1	1	1	1	1	1	1	1	1	1	1	1	1
14:45:31.947	1	1	1	1	1	1	1	1	1	1	1	1	1	1	1	1	1	1	1
14:45:32.922	1	1	1	1	1	1	1	1	1	1	1	1	1	1	1	1	1	1	1
14:45:33.909	1	1	1	1	1	1	1	1	1	1	1	1	1	1	1	1	1	1	1
14:45:34.877	1	1	1	1	1	1	1	1	1	1	1	1	1	1	1	1	1	1	1
14:45:35.859	1	1	1	1	1	1	1	1	1	1	1	1	1	1	1	1	1	1	1
14:45:36.830	1	1	1	1	1	1	1	1	1	1	1	1	1	1	1	1	1	1	1
14:45:37.815	1	1	1	1	1	1	1	1	1	1	1	1	1	1	1	1	1	1	1
14:45:38.786	1	1	1	1	1	1	1	1	1	1	1	1	1	1	1	1	1	1	1
14:45:39.758	1	1	1	1	1	1	1	1	1	1	1	1	1	1	1	1	1	1	1
14:45:40.742	1	1	1	1	1	1	1	1	1	1	1	1	1	1	1	1	1	1	1
14:45:41.708	1	1	1	1	1	1	1	1	1	1	1	1	1	1	1	1	1	1	1
14:45:42.695	1	1	1	1	1	1	1	1	1	1	1	1	1	1	1	1	1	1	1
14:45:43.669	1	1	1	1	1	1	1	1	1	1	1	1	1	1	1	1	1	1	1
14:45:44.649	1	1	1	1	1	1	1	1	1	1	1	1	1	1	1	1	1	1	1
14:45:45.621	1	1	1	1	1	1	1	1	1	1	1	1	1	1	1	1	1	1	1
14:45:46.598	1	1	1	1	1	1	1	1	1	1	1	1	1	1	1	1	1	1	1
14:45:47.582	1	1	1	1	1	1	1	1	1	1	1	1	1	1	1	1	1	1	1
14:45:48.551	1	1	1	1	1	1	1	1	1	1	1	1	1	1	1	1	1	1	1
14:45:49.525	1	1	1	1	1	1	1	1	1	1	1	1	1	1	1	1	1	1	1
14:45:50.512	1	1	1	1	1	1	1	1	1	1	1	1	1	1	1	1	1	1	1
14:45:51.477	1	1	1	1	1	1	1	1	1	1	1	1	1	1	1	1	1	1	1
14:45:52.462	1	1	1	1	1	1	1	1	1	1	1	1	1	1	1	1	1	1	1
14:45:53.439	1	1	1	1	1	1	1	1	1	1	1	1	1	1	1	1	1	1	1
14:45:54.414	1	1	1	1	1	1	1	1	1	1	1	1	1	1	1	1	1	1	1
14:45:55.377	1	1	1	1	1	1	1	1	1	1	1	1	1	1	1	1	1	1	1
14:45:56.364	1	1	1	1	1	1	1	1	1	1	1	1	1	1	1	1	1	1	1
14:45:57.337	1	1	1	1	1	1	1	1	1	1	1	1	1	1	1	1	1	1	1
14:45:58.325	1	1	1	1	1	1	1	1	1	1	1	1	1	1	1	1	1	1	1
14:45:59.297	1	1	1	1	1	1	1	1	1	1	1	1	1	1	1	1	1	1	1
14:46:00.273	1	1	1	1	1	1	1	1	1	1	1	1	1	1	1	1	1	1	1
14:47:15.385	1	1	1	1	1	1	1	1	1	1	1	1	1	1	1	1	1	1	1
14:47:16.362	1	1	1	1	1	1	1	1	1	1	1	1	1	1	1	1	1	1	1
14:47:17.341	1	1	1	1	1	1	1	1	1	1	1	1	1	1	1	1	1	1	1
14:47:18.316	1	1	1	1	1	1	1	1	1	1	1	1	1	1	1	1	1	1	1
14:47:19.292	1	1	1	1	1	1	1	1	1	1	1	1	1	1	1	1	1	1	1
14:47:20.262	1	1	1	1	1	1	1	1	1	1	1	1	1	1	1	1	1	1	1
14:47:21.248	1	1	1	1	1	1	1	1	1	1	1	1	1	1	1	1	1	1	1
14:47:22.212	1	1	1	1	1	1	1	1	1	1	1	1	1	1	1	1	1	1	1
14:47:23.198	1	1	1	1	1	1	1	1	1	1	1	1	1	1	1	1	1	1	1
14:47:24.177	1	1	1	1	1	1	1	1	1	1	1	1	1	1	1	1	1	1	1
14:47:25.153	1	1	1	1	1	1	1	1	1	1	1	1	1	1	1	1	1	1	1
14:47:26.122	1	1	1	1	1	1	1	1	1	1	1	1	1	1	1	1	1	1	1
14:47:27.106	1	1	1	1	1	1	1	1	1	1	1	1	1	1	1	1	1	1	1
14:47:28.076	1	1	1	1	1	1	1	1	1	1	1	1	1	1	1	1	1	1	1
14:47:29.047	1	1	1	1	1	1	1	1	1	1	1	1	1	1	1	1	1	1	1
14:47:30.035	1	1	1	1	1	1	1	1	1	1	1	1	1	1	1	1	1	1	1
14:47:31.013	1	1	1	1	1	1	1	1	1	1	1	1	1	1	1	1	1	1	1
14:47:31.983	1	1	1	1	1	1	1	1	1	1	1	1	1	1	1	1	1	1	1
14:47:32.952	1	1	1	1	1	1	1	1	1	1	1	1	1	1	1	1	1	1	1
14:47:33.938	1	1	1	1	1	1	1	1	1	1	1	1	1	1	1	1	1	1	1
14:47:34.920	1	1	1	1	1	1	1	1	1	1	1	1	1	1	1	1	1	1	1
14:47:35.887	1	1	1	1	1	1	1	1	1	1	1	1	1	1	1	1	1	1	1
14:47:36.873	1	1	1	1	1	1	1	1	1	1	1	1	1	1	1	1	1	1	1
14:47:37.842	1	1	1	1	1	1	1	1	1	1	1	1	1	1	1	1	1	1	1
14:47:38.825	1	1	1	1	1	1	1	1	1	1	1	1	1	1	1	1	1	1	1
14:47:39.790	1	1	1	1	1	1	1	1	1	1	1	1	1	1	1	1	1	1	1
14:47:40.775	1	1	1	1	1	1	1	1	1	1	1	1	1	1	1	1	1	1	1
14:47:41.745	1	1	1	1	1	1	1	1	1	1	1	1	1	1	1	1	1	1	1
14:47:42.731	1	1	1	1	1	1	1	1	1	1	1	1	1	1	1	1	1	1	1
14:47:43.694	1	1	1	1	1	1	1	1	1	1	1	1	1	1	1	1	1	1	1
14:47:44.680	1	1	1	1	1	1	1	1	1	1	1	1	1	1	1	1	1	1	1
14:47:45.650	1	1	1	1	1	1	1	1	1	1	1	1	1	1	1	1	1	1	1
14:47:46.635	1	1	1	1	1	1	1	1	1	1	1	1	1	1	1	1	1	1	1
14:47:47.614	1	1	1	1	1	1	1	1	1	1	1	1	1	1	1	1	1	1	1
14:47:48.583	1	1	1	1	1	1	1	1	1	1	1	1	1	1	1	1	1	1	1
14:47:49.553	1	1	1	1	1	1	1	1	1	1	1	1	1	1	1	1	1	1	1
14:47:50.539	1	1	1	1	1	1	1	1	1	1	1	1	1	1	1	1	1	1	1
14:47:51.517	1	1	1	1	1	1	1	1	1	1	1	1	1	1	1	1	1	1	1
14:47:52.487	1	1	1	1	1	1	1	1	1	1	1	1	1	1	1	1	1	1	1
14:47:53.472	1	1	1	1	1	1	1	1	1	1	1	1	1	1	1	1	1	1	1
14:47:54.442	1	1	1	1	1	1	1	1	1	1	1	1	1	1	1	1	1	1	1
14:47:55.421	1	1	1	1	1	1	1	1	1	1	1	1	1	1	1	1	1	1	1
14:47:56.391	1	1	1	1	1	1	1	1	1	1	1	1	1	1	1	1	1	1	1
14:47:57.376	1	1	1	1	1	1	1	1	1	1	1	1	1	1	1	1	1	1	1
14:47:58.346	1	1	1	1	1	1	1	1	1	1	1	1	1	1	1	1	1	1	1
14:47:59.324	1	1	1	1	1	1	1	1	1	1	1	1	1	1	1	1	1	1	1
14:48:00.310	1	1	1	1	1	1	1	1	1	1	1	1	1	1	1	1	1	1	1
14:49:15.818	1	1	1	1	1	1	1	1	1	1	1	1	1	1	1	1	1	1	1
14:49:16.790	1	1	1	1	1	1	1	1	1	1	1	1	1	1	1	1	1	1	1
14:49:17.775	1	1	1	1	1	1	1	1	1	1	1	1	1	1	1	1	1	1	1
14:49:18.741	1	1	1	1	1	1	1	1	1	1	1	1	1	1	1	1	1	1	1
14:49:19.718	1	1	1	1	1	1	1	1	1	1	1	1	1	1	1	1	1	1	1
14:49:20.698	1	1	1	1	1	1	1	1	1	1	1	1	1	1	1	1	1	1	1
14:49:21.672	1	1	1	1	1	1	1	1	1	1	1	1	1	1	1	1	1	1	1
14:49:22.660	1	1	1	1	1	1	1	1	1	1	1	1	1	1	1	1	1	1	1
14:49:23.630	1	1	1	1	1	1	1	1	1	1	1	1	1	1	1	1	1	1	1
14:49:24.603	1	1	1	1	1	1	1	1	1	1	1	1	1	1	1	1	1	1	1
14:49:25.580	1	1	1	1	1	1	1	1	1	1	1	1	1	1	1	1	1	1	1
14:49:26.557	1	1	1	1	1	1	1	1	1	1	1	1	1	1	1	1	1	1	1
14:49:27.543	1	1	1	1	1	1	1	1	1	1	1	1	1	1	1	1	1	1	1
14:49:28.506	1	1	1	1	1	1	1	1	1	1	1	1	1	1	1	1	1	1	1
14:49:29.496	1	1	1	1	1	1	1	1	1	1	1	1	1	1	1	1	1	1	1
14:49:30.465	1	1	1	1	1	1	1	1	1	1	1	1	1	1	1	1	1	1	1
14:49:31.434	1	1	1	1	1	1	1	1	1	1	1	1	1	1	1	1	1	1	1
14:49:32.414	1	1	1	1	1	1	1	1	1	1	1	1	1	1	1	1	1	1	1
14:49:33.389	1	1	1	1	1	1	1	1	1	1	1	1	1	1	1	1	1	1	1
14:49:34.376	1	1	1	1	1	1	1	1	1	1	1	1	1	1	1	1	1	1	1
14:49:35.356	1	1	1	1	1	1	1	1	1	1	1	1	1	1	1	1	1	1	1
14:49:36.325	1	1	1	1	1	1	1	1	1	1	1	1	1	1	1	1	1	1	1
14:49:37.297	1	1	1	1	1	1	1	1	1	1	1	1	1	1	1	1	1	1	1
14:49:38.272	1	1	1	1	1	1	1	1	1	1	1	1	1	1	1	1	1	1	1
14:49:39.257	1	1	1	1	1	1	1	1	1	1	1	1	1	1	1	1	1	1	1
14:49:40.229	1	1	1	1	1	1	1	1	1	1	1	1	1	1	1	1	1	1	1
14:49:41.204	1	1	1	1	1	1	1	1	1	1	1	1	1	1	1	1	1	1	1
14:49:42.191	1	1	1	1	1	1	1	1	1	1	1	1	1	1	1	1	1	1	1
14:49:43.166	1	1	1	1	1	1	1	1	1	1	1	1	1	1	1	1	1	1	1
14:49:44.134	1	1	1	1	1	1	1	1	1	1	1	1	1	1	1	1	1	1	1
14:49:45.110	1	1	1	1	1	1	1	1	1	1	1	1	1	1	1	1	1	1	1
14:49:46.091	1	1	1	1	1	1	1	1	1	1	1	1	1	1	1	1	1	1	1
14:49:47.050	1	1	1	1	1	1	1	1	1	1	1	1	1	1	1	1	1	1	1
14:49:48.051	1	1	1	1	1	1	1	1	1	1	1	1	1	1	1	1	1	1	1
14:49:49.027	1	1	1	1	1	1	1	1	1	1	1	1	1	1	1	1	1	1	1
14:49:50.004	1	1	1	1	1	1	1	1	1	1	1	1	1	1	1	1	1	1	1
14:49:50.979	1	1	1	1	1	1	1	1	1	1	1	1	1	1	1	1	1	1	1
14:49:51.954	1	1	1	1	1	1	1	1	1	1	1	1	1	1	1	1	1	1	1
14:49:52.920	1	1	1	1	1	1	1	1	1	1	1	1	1	1	1	1	1	1	1
14:49:53.909	1	1	1	1	1	1	1	1	1	1	1	1	1	1	1	1	1	1	1
14:49:54.882	1	1	1	1	1	1	1	1	1	1	1	1	1	1	1	1	1	1	1
14:49:55.859	1	1	1	1	1	1	1	1	1	1	1	1	1	1	1	1	1	1	1
14:49:56.833	1	1	1	1	1	1	1	1	1	1	1	1	1	1	1	1	1	1	1
14:49:57.810	1	1	1	1	1	1	1	1	1	1	1	1	1	1	1	1	1	1	1
14:49:58.792	1	1	1	1	1	1	1	1	1	1	1	1	1	1	1	1	1	1	1
14:49:59.757	1	1	1	1	1	1	1	1	1	1	1	1	1	1	1	1	1	1	1
14:50:00.746	1	1	1	1	1	1	1	1	1	1	1	1	1	1	1	1	1	1	1
14:51:15.840	1	1	1	1	1	1	1	1	1	1	1	1	1	1	1	1	1	1	1
14:51:16.819	1	1	1	1	1	1	1	1	1	1	1	1	1	1	1	1	1	1	1
14:51:17.778	1	1	1	1	1	1	1	1	1	1	1	1	1	1	1	1	1	1	1
14:51:18.769	1	1	1	1	1	1	1	1	1	1	1	1	1	1	1	1	1	1	1
14:51:19.732	1	1	1	1	1	1	1	1	1	1	1	1	1	1	1	1	1	1	1
14:51:20.722	1	1	1	1	1	1	1	1	1	1	1	1	1	1	1	1	1	1	1
14:51:21.699	1	1	1	1	1	1	1	1	1	1	1	1	1	1	1	1	1	1	1
14:51:22.676	1	1	1	1	1	1	1	1	1	1	1	1	1	1	1	1	1	1	1
14:51:23.646	1	1	1	1	1	1	1	1	1	1	1	1	1	1	1	1	1	1	1
14:51:24.625	1	1	1	1	1	1	1	1	1	1	1	1	1	1	1	1	1	1	1
14:51:25.598	1	1	1	1	1	1	1	1	1	1	1	1	1	1	1	1	1	1	1
14:51:26.573	1	1	1	1	1	1	1	1	1	1	1	1	1	1	1	1	1	1	1
14:51:27.544	1	1	1	1	1	1	1	1	1	1	1	1	1	1	1	1	1	1	1
14:51:28.524	1	1	1	1	1	1	1	1	1	1	1	1	1	1	1	1	1	1	1
14:51:29.503	1	1	1	1	1	1	1	1	1	1	1	1	1	1	1	1	1	1	1
14:51:30.476	1	1	1	1	1	1	1	1	1	1	1	1	1	1	1	1	1	1	1
14:51:31.463	1	1	1	1	1	1	1	1	1	1	1	1	1	1	1	1	1	1	1
14:51:32.441	1	1	1	1	1	1	1	1	1	1	1	1	1	1	1	1	1	1	1
14:51:33.404	1	1	1	1	1	1	1	1	1	1	1	1	1	1	1	1	1	1	1
14:51:34.390	1	1	1	1	1	1	1	1	1	1	1	1	1	1	1	1	1	1	1
14:51:35.359	1	1	1	1	1	1	1	1	1	1	1	1	1	1	1	1	1	1	1
14:51:36.344	1	1	1	1	1	1	1	1	1	1	1	1	1	1	1	1	1	1	1
14:51:37.312	1	1	1	1	1	1	1	1	1	1	1	1	1	1	1	1	1	1	1
14:51:38.297	1	1	1	1	1	1	1	1	1	1	1	1	1	1	1	1	1	1	1
14:51:39.272	1	1	1	1	1	1	1	1	1	1	1	1	1	1	1	1	1	1	1
14:51:40.254	1	1	1	1	1	1	1	1	1	1	1	1	1	1	1	1	1	1	1
14:51:41.220	1	1	1	1	1	1	1	1	1	1	1	1	1	1	1	1	1	1	1
14:51:42.195	1	1	1	1	1	1	1	1	1	1	1	1	1	1	1	1	1	1	1
14:51:43.171	1	1	1	1	1	1	1	1	1	1	1	1	1	1	1	1	1	1	1
14:51:44.151	1	1	1	1	1	1	1	1	1	1	1	1	1	1	1	1	1	1	1
14:51:45.131	1	1	1	1	1	1	1	1	1	1	1	1	1	1	1	1	1	1	1
14:51:46.105	1	1	1	1	1	1	1	1	1	1	1	1	1	1	1	1	1	1	1
14:51:47.093	1	1	1	1	1	1	1	1	1	1	1	1	1	1	1	1	1	1	1
14:51:48.058	1	1	1	1	1	1	1	1	1	1	1	1	1	1	1	1	1	1	1
14:51:49.044	1	1	1	1	1	1	1	1	1	1	1	1	1	1	1	1	1	1	1
14:51:50.005	1	1	1	1	1	1	1	1	1	1	1	1	1	1	1	1	1	1	1
14:51:50.986	1	1	1	1	1	1	1	1	1	1	1	1	1	1	1	1	1	1	1
14:51:51.961	1	1	1	1	1	1	1	1	1	1	1	1	1	1	1	1	1	1	1
14:51:52.937	1	1	1	1	1	1	1	1	1	1	1	1	1	1	1	1	1	1	1
14:51:53.922	1	1	1	1	1	1	1	1	1	1	1	1	1	1	1	1	1	1	1
14:51:54.902	1	1	1	1	1	1	1	1	1	1	1	1	1	1	1	1	1	1	1
14:51:55.877	1	1	1	1	1	1	1	1	1	1	1	1	1	1	1	1	1	1	1
14:51:56.858	1	1	1	1	1	1	1	1	1	1	1	1	1	1	1	1	1	1	1
14:51:57.827	1	1	1	1	1	1	1	1	1	1	1	1	1	1	1	1	1	1	1
14:51:58.814	1	1	1	1	1	1	1	1	1	1	1	1	1	1	1	1	1	1	1
14:51:59.785	1	1	1	1	1	1	1	1	1	1	1	1	1	1	1	1	1	1	1
14:53:15.204	1	1	1	1	1	1	1	1	1	1	1	1	1	1	1	1	1	1	1
14:53:16.175	1	1	1	1	1	1	1	1	1	1	1	1	1	1	1	1	1	1	1
14:53:17.153	1	1	1	1	1	1	1	1	1	1	1	1	1	1	1	1	1	1	1
14:53:18.128	1	1	1	1	1	1	1	1	1	1	1	1	1	1	1	1	1	1	1
14:53:19.115	1	1	1	1	1	1	1	1	1	1	1	1	1	1	1	1	1	1	1
14:53:20.091	1	1	1	1	1	1	1	1	1	1	1	1	1	1	1	1	1	1	1
14:53:21.069	1	1	1	1	1	1	1	1	1	1	1	1	1	1	1	1	1	1	1
14:53:22.033	1	1	1	1	1	1	1	1	1	1	1	1	1	1	1	1	1	1	1
14:53:23.012	1	1	1	1	1	1	1	1	1	1	1	1	1	1	1	1	1	1	1
14:53:23.989	1	1	1	1	1	1	1	1	1	1	1	1	1	1	1	1	1	1	1
14:53:24.977	1	1	1	1	1	1	1	1	1	1	1	1	1	1	1	1	1	1	1
14:53:25.940	1	1	1	1	1	1	1	1	1	1	1	1	1	1	1	1	1	1	1
14:53:26.931	1	1	1	1	1	1	1	1	1	1	1	1	1	1	1	1	1	1	1
14:53:27.902	1	1	1	1	1	1	1	1	1	1	1	1	1	1	1	1	1	1	1
14:53:28.886	1	1	1	1	1	1	1	1	1	1	1	1	1	1	1	1	1	1	1
14:53:29.856	1	1	1	1	1	1	1	1	1	1	1	1	1	1	1	1	1	1	1
14:53:30.834	1	1	1	1	1	1	1	1	1	1	1	1	1	1	1	1	1	1	1
14:53:31.809	1	1	1	1	1	1	1	1	1	1	1	1	1	1	1	1	1	1	1
14:53:32.783	1	1	1	1	1	1	1	1	1	1	1	1	1	1	1	1	1	1	1
14:53:33.768	1	1	1	1	1	1	1	1	1	1	1	1	1	1	1	1	1	1	1
14:53:34.742	1	1	1	1	1	1	1	1	1	1	1	1	1	1	1	1	1	1	1
14:53:35.720	1	1	1	1	1	1	1	1	1	1	1	1	1	1	1	1	1	1	1
14:53:36.695	1	1	1	1	1	1	1	1	1	1	1	1	1	1	1	1	1	1	1
14:53:37.660	1	1	1	1	1	1	1	1	1	1	1	1	1	1	1	1	1	1	1
14:53:38.646	1	1	1	1	1	1	1	1	1	1	1	1	1	1	1	1	1	1	1
14:53:39.616	1	1	1	1	1	1	1	1	1	1	1	1	1	1	1	1	1	1	1
14:53:40.601	1	1	1	1	1	1	1	1	1	1	1	1	1	1	1	1	1	1	1
14:53:41.576	1	1	1	1	1	1	1	1	1	1	1	1	1	1	1	1	1	1	1
14:53:42.551	1	1	1	1	1	1	1	1	1	1	1	1	1	1	1	1	1	1	1
14:53:43.521	1	1	1	1	1	1	1	1	1	1	1	1	1	1	1	1	1	1	1
14:53:44.507	1	1	1	1	1	1	1	1	1	1	1	1	1	1	1	1	1	1	1
14:53:45.473	1	1	1	1	1	1	1	1	1	1	1	1	1	1	1	1	1	1	1
14:53:46.464	1	1	1	1	1	1	1	1	1	1	1	1	1	1	1	1	1	1	1
14:53:47.438	1	1	1	1	1	1	1	1	1	1	1	1	1	1	1	1	1	1	1
14:53:48.409	1	1	1	1	1	1	1	1	1	1	1	1	1	1	1	1	1	1	1
14:53:49.393	1	1	1	1	1	1	1	1	1	1	1	1	1	1	1	1	1	1	1
14:53:50.355	1	1	1	1	1	1	1	1	1	1	1	1	1	1	1	1	1	1	1
14:53:51.340	1	1	1	1	1	1	1	1	1	1	1	1	1	1	1	1	1	1	1
14:53:52.310	1	1	1	1	1	1	1	1	1	1	1	1	1	1	1	1	1	1	1
14:53:53.283	1	1	1	1	1	1	1	1	1	1	1	1	1	1	1	1	1	1	1
14:53:54.275	1	1	1	1	1	1	1	1	1	1	1	1	1	1	1	1	1	1	1
14:53:55.244	1	1	1	1	1	1	1	1	1	1	1	1	1	1	1	1	1	1	1
14:53:56.213	1	1	1	1	1	1	1	1	1	1	1	1	1	1	1	1	1	1	1
14:53:57.195	1	1	1	1	1	1	1	1	1	1	1	1	1	1	1	1	1	1	1
14:53:58.181	1	1	1	1	1	1	1	1	1	1	1	1	1	1	1	1	1	1	1
14:53:59.141	1	1	1	1	1	1	1	1	1	1	1	1	1	1	1	1	1	1	1
14:54:00.128	1	1	1	1	1	1	1	1	1	1	1	1	1	1	1	1	1	1	1
14:55:15.788	1	1	1	1	1	1	1	1	1	1	1	1	1	1	1	1	1	1	1
14:55:16.772	1	1	1	1	1	1	1	1	1	1	1	1	1	1	1	1	1	1	1
14:55:17.744	1	1	1	1	1	1	1	1	1	1	1	1	1	1	1	1	1	1	1
14:55:18.729	1	1	1	1	1	1	1	1	1	1	1	1	1	1	1	1	1	1	1
14:55:19.700	1	1	1	1	1	1	1	1	1	1	1	1	1	1	1	1	1	1	1
14:55:20.680	1	1	1	1	1	1	1	1	1	1	1	1	1	1	1	1	1	1	1
14:55:21.659	1	1	1	1	1	1	1	1	1	1	1	1	1	1	1	1	1	1	1
14:55:22.630	1	1	1	1	1	1	1	1	1	1	1	1	1	1	1	1	1	1	1
14:55:23.616	1	1	1	1	1	1	1	1	1	1	1	1	1	1	1	1	1	1	1
14:55:24.575	1	1	1	1	1	1	1	1	1	1	1	1	1	1	1	1	1	1	1
14:55:25.555	1	1	1	1	1	1	1	1	1	1	1	1	1	1	1	1	1	1	1
14:55:26.528	1	1	1	1	1	1	1	1	1	1	1	1	1	1	1	1	1	1	1
14:55:27.519	1	1	1	1	1	1	1	1	1	1	1	1	1	1	1	1	1	1	1
14:55:28.490	1	1	1	1	1	1	1	1	1	1	1	1	1	1	1	1	1	1	1
14:55:29.475	1	1	1	1	1	1	1	1	1	1	1	1	1	1	1	1	1	1	1
14:55:30.447	1	1	1	1	1	1	1	1	1	1	1	1	1	1	1	1	1	1	1
14:55:31.416	1	1	1	1	1	1	1	1	1	1	1	1	1	1	1	1	1	1	1
14:55:32.399	1	1	1	1	1	1	1	1	1	1	1	1	1	1	1	1	1	1	1
14:55:33.369	1	1	1	1	1	1	1	1	1	1	1	1	1	1	1	1	1	1	1
14:55:34.345	1	1	1	1	1	1	1	1	1	1	1	1	1	1	1	1	1	1	1
14:55:35.330	1	1	1	1	1	1	1	1	1	1	1	1	1	1	1	1	1	1	1
14:55:36.297	1	1	1	1	1	1	1	1	1	1	1	1	1	1	1	1	1	1	1
14:55:37.273	1	1	1	1	1	1	1	1	1	1	1	1	1	1	1	1	1	1	1
14:55:38.260	1	1	1	1	1	1	1	1	1	1	1	1	1	1	1	1	1	1	1
14:55:39.239	1	1	1	1	1	1	1	1	1	1	1	1	1	1	1	1	1	1	1
14:55:40.208	1	1	1	1	1	1	1	1	1	1	1	1	1	1	1	1	1	1	1
14:55:41.179	1	1	1	1	1	1	1	1	1	1	1	1	1	1	1	1	1	1	1
14:55:42.153	1	1	1	1	1	1	1	1	1	1	1	1	1	1	1	1	1	1	1
14:55:43.138	1	1	1	1	1	1	1	1	1	1	1	1	1	1	1	1	1	1	1
14:55:44.108	1	1	1	1	1	1	1	1	1	1	1	1	1	1	1	1	1	1	1
14:55:45.098	1	1	1	1	1	1	1	1	1	1	1	1	1	1	1	1	1	1	1
14:55:46.067	1	1	1	1	1	1	1	1	1	1	1	1	1	1	1	1	1	1	1
14:55:47.041	1	1	1	1	1	1	1	1	1	1	1	1	1	1	1	1	1	1	1
14:55:48.017	1	1	1	1	1	1	1	1	1	1	1	1	1	1	1	1	1	1	1
14:55:48.992	1	1	1	1	1	1	1	1	1	1	1	1	1	1	1	1	1	1	1
14:55:49.975	1	1	1	1	1	1	1	1	1	1	1	1	1	1	1	1	1	1	1
14:55:50.945	1	1	1	1	1	1	1	1	1	1	1	1	1	1	1	1	1	1	1
14:55:51.924	1	1	1	1	1	1	1	1	1	1	1	1	1	1	1	1	1	1	1
14:55:52.907	1	1	1	1	1	1	1	1	1	1	1	1	1	1	1	1	1	1	1
14:55:53.889	1	1	1	1	1	1	1	1	1	1	1	1	1	1	1	1	1	1	1
14:55:54.850	1	1	1	1	1	1	1	1	1	1	1	1	1	1	1	1	1	1	1
14:55:55.828	1	1	1	1	1	1	1	1	1	1	1	1	1	1	1	1	1	1	1
14:55:56.813	1	1	1	1	1	1	1	1	1	1	1	1	1	1	1	1	1	1	1
14:55:57.779	1	1	1	1	1	1	1	1	1	1	1	1	1	1	1	1	1	1	1
14:55:58.769	1	1	1	1	1	1	1	1	1	1	1	1	1	1	1	1	1	1	1
14:55:59.738	1	1	1	1	1	1	1	1	1	1	1	1	1	1	1	1	1	1	1
14:57:15.221	1	1	1	1	1	1	1	1	1	1	1	1	1	1	1	1	1	1	1
14:57:16.194	1	1	1	1	1	1	1	1	1	1	1	1	1	1	1	1	1	1	1
14:57:17.174	1	1	1	1	1	1	1	1	1	1	1	1	1	1	1	1	1	1	1
14:57:18.149	1	1	1	1	1	1	1	1	1	1	1	1	1	1	1	1	1	1	1
14:57:19.126	1	1	1	1	1	1	1	1	1	1	1	1	1	1	1	1	1	1	1
14:57:20.090	1	1	1	1	1	1	1	1	1	1	1	1	1	1	1	1	1	1	1
14:57:21.077	1	1	1	1	1	1	1	1	1	1	1	1	1	1	1	1	1	1	1
14:57:22.046	1	1	1	1	1	1	1	1	1	1	1	1	1	1	1	1	1	1	1
14:57:23.031	1	1	1	1	1	1	1	1	1	1	1	1	1	1	1	1	1	1	1
14:57:24.009	1	1	1	1	1	1	1	1	1	1	1	1	1	1	1	1	1	1	1
14:57:24.992	1	1	1	1	1	1	1	1	1	1	1	1	1	1	1	1	1	1	1
14:57:25.963	1	1	1	1	1	1	1	1	1	1	1	1	1	1	1	1	1	1	1
14:57:26.933	1	1	1	1	1	1	1	1	1	1	1	1	1	1	1	1	1	1	1
14:57:27.919	1	1	1	1	1	1	1	1	1	1	1	1	1	1	1	1	1	1	1
14:57:28.895	1	1	1	1	1	1	1	1	1	1	1	1	1	1	1	1	1	1	1
14:57:29.874	1	1	1	1	1	1	1	1	1	1	1	1	1	1	1	1	1	1	1
14:57:30.834	1	1	1	1	1	1	1	1	1	1	1	1	1	1	1	1	1	1	1
14:57:31.821	1	1	1	1	1	1	1	1	1	1	1	1	1	1	1	1	1	1	1
14:57:32.796	1	1	1	1	1	1	1	1	1	1	1	1	1	1	1	1	1	1	1
14:57:33.774	1	1	1	1	1	1	1	1	1	1	1	1	1	1	1	1	1	1	1
14:57:34.749	1	1	1	1	1	1	1	1	1	1	1	1	1	1	1	1	1	1	1
14:57:35.720	1	1	1	1	1	1	1	1	1	1	1	1	1	1	1	1	1	1	1
14:57:36.703	1	1	1	1	1	1	1	1	1	1	1	1	1	1	1	1	1	1	1
14:57:37.678	1	1	1	1	1	1	1	1	1	1	1	1	1	1	1	1	1	1	1
14:57:38.648	1	1	1	1	1	1	1	1	1	1	1	1	1	1	1	1	1	1	1
14:57:39.633	1	1	1	1	1	1	1	1	1	1	1	1	1	1	1	1	1	1	1
14:57:40.611	1	1	1	1	1	1	1	1	1	1	1	1	1	1	1	1	1	1	1
14:57:41.581	1	1	1	1	1	1	1	1	1	1	1	1	1	1	1	1	1	1	1
14:57:42.557	1	1	1	1	1	1	1	1	1	1	1	1	1	1	1	1	1	1	1
14:57:43.527	1	1	1	1	1	1	1	1	1	1	1	1	1	1	1	1	1	1	1
14:57:44.520	1	1	1	1	1	1	1	1	1	1	1	1	1	1	1	1	1	1	1
14:57:45.486	1	1	1	1	1	1	1	1	1	1	1	1	1	1	1	1	1	1	1
14:57:46.474	1	1	1	1	1	1	1	1	1	1	1	1	1	1	1	1	1	1	1
14:57:47.436	1	1	1	1	1	1	1	1	1	1	1	1	1	1	1	1	1	1	1
14:57:48.428	1	1	1	1	1	1	1	1	1	1	1	1	1	1	1	1	1	1	1
14:57:49.388	1	1	1	1	1	1	1	1	1	1	1	1	1	1	1	1	1	1	1
14:57:50.372	1	1	1	1	1	1	1	1	1	1	1	1	1	1	1	1	1	1	1
14:57:51.347	1	1	1	1	1	1	1	1	1	1	1	1	1	1	1	1	1	1	1
14:57:52.332	1	1	1	1	1	1	1	1	1	1	1	1	1	1	1	1	1	1	1
14:57:53.299	1	1	1	1	1	1	1	1	1	1	1	1	1	1	1	1	1	1	1
14:57:54.279	1	1	1	1	1	1	1	1	1	1	1	1	1	1	1	1	1	1	1
14:57:55.265	1	1	1	1	1	1	1	1	1	1	1	1	1	1	1	1	1	1	1
14:57:56.225	1	1	1	1	1	1	1	1	1	1	1	1	1	1	1	1	1	1	1
14:57:57.206	1	1	1	1	1	1	1	1	1	1	1	1	1	1	1	1	1	1	1
14:57:58.179	1	1	1	1	1	1	1	1	1	1	1	1	1	1	1	1	1	1	1
14:57:59.170	1	1	1	1	1	1	1	1	1	1	1	1	1	1	1	1	1	1	1
14:58:00.135	1	1	1	1	1	1	1	1	1	1	1	1	1	1	1	1	1	1	1
14:59:16.032	1	1	1	1	1	1	1	1	1	1	1	1	1	1	1	1	1	1	1
14:59:17.004	1	1	1	1	1	1	1	1	1	1	1	1	1	1	1	1	1	1	1
14:59:17.982	1	1	1	1	1	1	1	1	1	1	1	1	1	1	1	1	1	1	1
14:59:18.963	1	1	1	1	1	1	1	1	1	1	1	1	1	1	1	1	1	1	1
14:59:19.936	1	1	1	1	1	1	1	1	1	1	1	1	1	1	1	1	1	1	1
14:59:20.911	1	1	1	1	1	1	1	1	1	1	1	1	1	1	1	1	1	1	1
14:59:21.885	1	1	1	1	1	1	1	1	1	1	1	1	1	1	1	1	1	1	1
14:59:22.866	1	1	1	1	1	1	1	1	1	1	1	1	1	1	1	1	1	1	1
14:59:23.842	1	1	1	1	1	1	1	1	1	1	1	1	1	1	1	1	1	1	1
14:59:24.828	1	1	1	1	1	1	1	1	1	1	1	1	1	1	1	1	1	1	1
14:59:25.793	1	1	1	1	1	1	1	1	1	1	1	1	1	1	1	1	1	1	1
14:59:26.774	1	1	1	1	1	1	1	1	1	1	1	1	1	1	1	1	1	1	1
14:59:27.741	1	1	1	1	1	1	1	1	1	1	1	1	1	1	1	1	1	1	1
14:59:28.722	1	1	1	1	1	1	1	1	1	1	1	1	1	1	1	1	1	1	1
14:59:29.709	1	1	1	1	1	1	1	1	1	1	1	1	1	1	1	1	1	1	1
14:59:30.679	1	1	1	1	1	1	1	1	1	1	1	1	1	1	1	1	1	1	1
14:59:31.655	1	1	1	1	1	1	1	1	1	1	1	1	1	1	1	1	1	1	1
14:59:32.625	1	1	1	1	1	1	1	1	1	1	1	1	1	1	1	1	1	1	1
14:59:33.606	1	1	1	1	1	1	1	1	1	1	1	1	1	1	1	1	1	1	1
14:59:34.577	1	1	1	1	1	1	1	1	1	1	1	1	1	1	1	1	1	1	1
14:59:35.561	1	1	1	1	1	1	1	1	1	1	1	1	1	1	1	1	1	1	1
14:59:36.534	1	1	1	1	1	1	1	1	1	1	1	1	1	1	1	1	1	1	1
14:59:37.517	1	1	1	1	1	1	1	1	1	1	1	1	1	1	1	1	1	1	1
14:59:38.488	1	1	1	1	1	1	1	1	1	1	1	1	1	1	1	1	1	1	1
14:59:39.467	1	1	1	1	1	1	1	1	1	1	1	1	1	1	1	1	1	1	1
14:59:40.453	1	1	1	1	1	1	1	1	1	1	1	1	1	1	1	1	1	1	1
14:59:41.423	1	1	1	1	1	1	1	1	1	1	1	1	1	1	1	1	1	1	1
14:59:42.387	1	1	1	1	1	1	1	1	1	1	1	1	1	1	1	1	1	1	1
14:59:43.373	1	1	1	1	1	1	1	1	1	1	1	1	1	1	1	1	1	1	1
14:59:44.343	1	1	1	1	1	1	1	1	1	1	1	1	1	1	1	1	1	1	1
14:59:45.328	1	1	1	1	1	1	1	1	1	1	1	1	1	1	1	1	1	1	1
14:59:46.312	1	1	1	1	1	1	1	1	1	1	1	1	1	1	1	1	1	1	1
14:59:47.276	1	1	1	1	1	1	1	1	1	1	1	1	1	1	1	1	1	1	1
14:59:48.261	1	1	1	1	1	1	1	1	1	1	1	1	1	1	1	1	1	1	1
14:59:49.233	1	1	1	1	1	1	1	1	1	1	1	1	1	1	1	1	1	1	1
14:59:50.213	1	1	1	1	1	1	1	1	1	1	1	1	1	1	1	1	1	1	1
14:59:51.182	1	1	1	1	1	1	1	1	1	1	1	1	1	1	1	1	1	1	1
14:59:52.167	1	1	1	1	1	1	1	1	1	1	1	1	1	1	1	1	1	1	1
14:59:53.136	1	1	1	1	1	1	1	1	1	1	1	1	1	1	1	1	1	1	1
14:59:54.115	1	1	1	1	1	1	1	1	1	1	1	1	1	1	1	1	1	1	1
14:59:55.084	1	1	1	1	1	1	1	1	1	1	1	1	1	1	1	1	1	1	1
14:59:56.069	1	1	1	1	1	1	1	1	1	1	1	1	1	1	1	1	1	1	1
14:59:57.047	1	1	1	1	1	1	1	1	1	1	1	1	1	1	1	1	1	1	1
14:59:58.025	1	1	1	1	1	1	1	1	1	1	1	1	1	1	1	1	1	1	1
14:59:59.000	1	1	1	1	1	1	1	1	1	1	1	1	1	1	1	1	1	1	1
14:59:59.976	1	1	1	1	1	1	1	1	1	1	1	1	1	1	1	1	1	1	1
15:01:15.428	1	1	1	1	1	1	1	1	1	1	1	1	1	1	1	1	1	1	1
15:01:16.421	1	1	1	1	1	1	1	1	1	1	1	1	1	1	1	1	1	1	1
15:01:17.393	1	1	1	1	1	1	1	1	1	1	1	1	1	1	1	1	1	1	1
15:01:18.377	1	1	1	1	1	1	1	1	1	1	1	1	1	1	1	1	1	1	1
15:01:19.343	1	1	1	1	1	1	1	1	1	1	1	1	1	1	1	1	1	1	1
15:01:20.317	1	1	1	1	1	1	1	1	1	1	1	1	1	1	1	1	1	1	1
15:01:21.303	1	1	1	1	1	1	1	1	1	1	1	1	1	1	1	1	1	1	1
15:01:22.269	1	1	1	1	1	1	1	1	1	1	1	1	1	1	1	1	1	1	1
15:01:23.244	1	1	1	1	1	1	1	1	1	1	1	1	1	1	1	1	1	1	1
15:01:24.230	1	1	1	1	1	1	1	1	1	1	1	1	1	1	1	1	1	1	1
15:01:25.208	1	1	1	1	1	1	1	1	1	1	1	1	1	1	1	1	1	1	1
15:01:26.189	1	1	1	1	1	1	1	1	1	1	1	1	1	1	1	1	1	1	1
15:01:27.161	1	1	1	1	1	1	1	1	1	1	1	1	1	1	1	1	1	1	1
15:01:28.136	1	1	1	1	1	1	1	1	1	1	1	1	1	1	1	1	1	1	1
15:01:29.105	1	1	1	1	1	1	1	1	1	1	1	1	1	1	1	1	1	1	1
15:01:30.081	1	1	1	1	1	1	1	1	1	1	1	1	1	1	1	1	1	1	1
15:01:31.060	1	1	1	1	1	1	1	1	1	1	1	1	1	1	1	1	1	1	1
15:01:32.033	1	1	1	1	1	1	1	1	1	1	1	1	1	1	1	1	1	1	1
15:01:33.019	1	1	1	1	1	1	1	1	1	1	1	1	1	1	1	1	1	1	1
15:01:33.988	1	1	1	1	1	1	1	1	1	1	1	1	1	1	1	1	1	1	1
15:01:34.979	1	1	1	1	1	1	1	1	1	1	1	1	1	1	1	1	1	1	1
15:01:35.939	1	1	1	1	1	1	1	1	1	1	1	1	1	1	1	1	1	1	1
15:01:36.926	1	1	1	1	1	1	1	1	1	1	1	1	1	1	1	1	1	1	1
15:01:37.901	1	1	1	1	1	1	1	1	1	1	1	1	1	1	1	1	1	1	1
15:01:38.871	1	1	1	1	1	1	1	1	1	1	1	1	1	1	1	1	1	1	1
15:01:39.847	1	1	1	1	1	1	1	1	1	1	1	1	1	1	1	1	1	1	1
15:01:40.835	1	1	1	1	1	1	1	1	1	1	1	1	1	1	1	1	1	1	1
15:01:41.800	1	1	1	1	1	1	1	1	1	1	1	1	1	1	1	1	1	1	1
15:01:42.785	1	1	1	1	1	1	1	1	1	1	1	1	1	1	1	1	1	1	1
15:01:43.759	1	1	1	1	1	1	1	1	1	1	1	1	1	1	1	1	1	1	1
15:01:44.735	1	1	1	1	1	1	1	1	1	1	1	1	1	1	1	1	1	1	1
15:01:45.713	1	1	1	1	1	1	1	1	1	1	1	1	1	1	1	1	1	1	1
15:01:46.688	1	1	1	1	1	1	1	1	1	1	1	1	1	1	1	1	1	1	1
15:01:47.661	1	1	1	1	1	1	1	1	1	1	1	1	1	1	1	1	1	1	1
15:01:48.650	1	1	1	1	1	1	1	1	1	1	1	1	1	1	1	1	1	1	1
15:01:49.619	1	1	1	1	1	1	1	1	1	1	1	1	1	1	1	1	1	1	1
15:01:50.600	1	1	1	1	1	1	1	1	1	1	1	1	1	1	1	1	1	1	1
15:01:51.570	1	1	1	1	1	1	1	1	1	1	1	1	1	1	1	1	1	1	1
15:01:52.554	1	1	1	1	1	1	1	1	1	1	1	1	1	1	1	1	1	1	1
15:01:53.523	1	1	1	1	1	1	1	1	1	1	1	1	1	1	1	1	1	1	1
15:01:54.505	1	1	1	1	1	1	1	1	1	1	1	1	1	1	1	1	1	1	1
15:01:55.472	1	1	1	1	1	1	1	1	1	1	1	1	1	1	1	1	1	1	1
15:01:56.458	1	1	1	1	1	1	1	1	1	1	1	1	1	1	1	1	1	1	1
15:01:57.422	1	1	1	1	1	1	1	1	1	1	1	1	1	1	1	1	1	1	1
15:01:58.409	1	1	1	1	1	1	1	1	1	1	1	1	1	1	1	1	1	1	1
15:01:59.384	1	1	1	1	1	1	1	1	1	1	1	1	1	1	1	1	1	1	1
15:02:00.361	1	1	1	1	1	1	1	1	1	1	1	1	1	1	1	1	1	1	1
15:03:16.028	1	1	1	1	1	1	1	1	1	1	1	1	1	1	1	1	1	1	1
15:03:17.013	1	1	1	1	1	1	1	1	1	1	1	1	1	1	1	1	1	1	1
15:03:17.991	1	1	1	1	1	1	1	1	1	1	1	1	1	1	1	1	1	1	1
15:03:18.960	1	1	1	1	1	1	1	1	1	1	1	1	1	1	1	1	1	1	1
15:03:19.945	1	1	1	1	1	1	1	1	1	1	1	1	1	1	1	1	1	1	1
15:03:20.914	1	1	1	1	1	1	1	1	1	1	1	1	1	1	1	1	1	1	1
15:03:21.893	1	1	1	1	1	1	1	1	1	1	1	1	1	1	1	1	1	1	1
15:03:22.863	1	1	1	1	1	1	1	1	1	1	1	1	1	1	1	1	1	1	1
15:03:23.849	1	1	1	1	1	1	1	1	1	1	1	1	1	1	1	1	1	1	1
15:03:24.825	1	1	1	1	1	1	1	1	1	1	1	1	1	1	1	1	1	1	1
15:03:25.793	1	1	1	1	1	1	1	1	1	1	1	1	1	1	1	1	1	1	1
15:03:26.779	1	1	1	1	1	1	1	1	1	1	1	1	1	1	1	1	1	1	1
15:03:27.760	1	1	1	1	1	1	1	1	1	1	1	1	1	1	1	1	1	1	1
15:03:28.726	1	1	1	1	1	1	1	1	1	1	1	1	1	1	1	1	1	1	1
15:03:29.717	1	1	1	1	1	1	1	1	1	1	1	1	1	1	1	1	1	1	1
15:03:30.683	1	1	1	1	1	1	1	1	1	1	1	1	1	1	1	1	1	1	1
15:03:31.669	1	1	1	1	1	1	1	1	1	1	1	1	1	1	1	1	1	1	1
15:03:32.641	1	1	1	1	1	1	1	1	1	1	1	1	1	1	1	1	1	1	1
15:03:33.617	1	1	1	1	1	1	1	1	1	1	1	1	1	1	1	1	1	1	1
15:03:34.588	1	1	1	1	1	1	1	1	1	1	1	1	1	1	1	1	1	1	1
15:03:35.562	1	1	1	1	1	1	1	1	1	1	1	1	1	1	1	1	1	1	1
15:03:36.537	1	1	1	1	1	1	1	1	1	1	1	1	1	1	1	1	1	1	1
15:03:37.522	1	1	1	1	1	1	1	1	1	1	1	1	1	1	1	1	1	1	1
15:03:38.486	1	1	1	1	1	1	1	1	1	1	1	1	1	1	1	1	1	1	1
15:03:39.471	1	1	1	1	1	1	1	1	1	1	1	1	1	1	1	1	1	1	1
15:03:40.441	1	1	1	1	1	1	1	1	1	1	1	1	1	1	1	1	1	1	1
15:03:41.427	1	1	1	1	1	1	1	1	1	1	1	1	1	1	1	1	1	1	1
15:03:42.407	1	1	1	1	1	1	1	1	1	1	1	1	1	1	1	1	1	1	1
15:03:43.375	1	1	1	1	1	1	1	1	1	1	1	1	1	1	1	1	1	1	1
15:03:44.346	1	1	1	1	1	1	1	1	1	1	1	1	1	1	1	1	1	1	1
15:03:45.331	1	1	1	1	1	1	1	1	1	1	1	1	1	1	1	1	1	1	1
15:03:46.313	1	1	1	1	1	1	1	1	1	1	1	1	1	1	1	1	1	1	1
15:03:47.281	1	1	1	1	1	1	1	1	1	1	1	1	1	1	1	1	1	1	1
15:03:48.251	1	1	1	1	1	1	1	1	1	1	1	1	1	1	1	1	1	1	1
15:03:49.236	1	1	1	1	1	1	1	1	1	1	1	1	1	1	1	1	1	1	1
15:03:50.219	1	1	1	1	1	1	1	1	1	1	1	1	1	1	1	1	1	1	1
15:03:51.187	1	1	1	1	1	1	1	1	1	1	1	1	1	1	1	1	1	1	1
15:03:52.160	1	1	1	1	1	1	1	1	1	1	1	1	1	1	1	1	1	1	1
15:03:53.149	1	1	1	1	1	1	1	1	1	1	1	1	1	1	1	1	1	1	1
15:03:54.113	1	1	1	1	1	1	1	1	1	1	1	1	1	1	1	1	1	1	1
15:03:55.092	1	1	1	1	1	1	1	1	1	1	1	1	1	1	1	1	1	1	1
15:03:56.066	1	1	1	1	1	1	1	1	1	1	1	1	1	1	1	1	1	1	1
15:03:57.051	1	1	1	1	1	1	1	1	1	1	1	1	1	1	1	1	1	1	1
15:03:58.026	1	1	1	1	1	1	1	1	1	1	1	1	1	1	1	1	1	1	1
15:03:59.011	1	1	1	1	1	1	1	1	1	1	1	1	1	1	1	1	1	1	1
15:03:59.979	1	1	1	1	1	1	1	1	1	1	1	1	1	1	1	1	1	1	1
15:05:15.401	1	1	1	1	1	1	1	1	1	1	1	1	1	1	1	1	1	1	1
15:05:16.378	1	1	1	1	1	1	1	1	1	1	1	1	1	1	1	1	1	1	1
15:05:17.355	1	1	1	1	1	1	1	1	1	1	1	1	1	1	1	1	1	1	1
15:05:18.324	1	1	1	1	1	1	1	1	1	1	1	1	1	1	1	1	1	1	1
15:05:19.294	1	1	1	1	1	1	1	1	1	1	1	1	1	1	1	1	1	1	1
15:05:20.287	1	1	1	1	1	1	1	1	1	1	1	1	1	1	1	1	1	1	1
15:05:21.252	1	1	1	1	1	1	1	1	1	1	1	1	1	1	1	1	1	1	1
15:05:22.240	1	1	1	1	1	1	1	1	1	1	1	1	1	1	1	1	1	1	1
15:05:23.199	1	1	1	1	1	1	1	1	1	1	1	1	1	1	1	1	1	1	1
15:05:24.190	1	1	1	1	1	1	1	1	1	1	1	1	1	1	1	1	1	1	1
15:05:25.166	1	1	1	1	1	1	1	1	1	1	1	1	1	1	1	1	1	1	1
15:05:26.142	1	1	1	1	1	1	1	1	1	1	1	1	1	1	1	1	1	1	1
15:05:27.111	1	1	1	1	1	1	1	1	1	1	1	1	1	1	1	1	1	1	1
15:05:28.102	1	1	1	1	1	1	1	1	1	1	1	1	1	1	1	1	1	1	1
15:05:29.062	1	1	1	1	1	1	1	1	1	1	1	1	1	1	1	1	1	1	1
15:05:30.042	1	1	1	1	1	1	1	1	1	1	1	1	1	1	1	1	1	1	1
15:05:31.023	1	1	1	1	1	1	1	1	1	1	1	1	1	1	1	1	1	1	1
15:05:32.003	1	1	1	1	1	1	1	1	1	1	1	1	1	1	1	1	1	1	1
15:05:32.976	1	1	1	1	1	1	1	1	1	1	1	1	1	1	1	1	1	1	1
15:05:33.953	1	1	1	1	1	1	1	1	1	1	1	1	1	1	1	1	1	1	1
15:05:34.928	1	1	1	1	1	1	1	1	1	1	1	1	1	1	1	1	1	1	1
15:05:35.902	1	1	1	1	1	1	1	1	1	1	1	1	1	1	1	1	1	1	1
15:05:36.889	1	1	1	1	1	1	1	1	1	1	1	1	1	1	1	1	1	1	1
15:05:37.856	1	1	1	1	1	1	1	1	1	1	1	1	1	1	1	1	1	1	1
15:05:38.842	1	1	1	1	1	1	1	1	1	1	1	1	1	1	1	1	1	1	1
15:05:39.805	1	1	1	1	1	1	1	1	1	1	1	1	1	1	1	1	1	1	1
15:05:40.795	1	1	1	1	1	1	1	1	1	1	1	1	1	1	1	1	1	1	1
15:05:41.766	1	1	1	1	1	1	1	1	1	1	1	1	1	1	1	1	1	1	1
15:05:42.737	1	1	1	1	1	1	1	1	1	1	1	1	1	1	1	1	1	1	1
15:05:43.713	1	1	1	1	1	1	1	1	1	1	1	1	1	1	1	1	1	1	1
15:05:44.703	1	1	1	1	1	1	1	1	1	1	1	1	1	1	1	1	1	1	1
15:05:45.674	1	1	1	1	1	1	1	1	1	1	1	1	1	1	1	1	1	1	1
15:05:46.645	1	1	1	1	1	1	1	1	1	1	1	1	1	1	1	1	1	1	1
15:05:47.619	1	1	1	1	1	1	1	1	1	1	1	1	1	1	1	1	1	1	1
15:05:48.604	1	1	1	1	1	1	1	1	1	1	1	1	1	1	1	1	1	1	1
15:05:49.569	1	1	1	1	1	1	1	1	1	1	1	1	1	1	1	1	1	1	1
15:05:50.555	1	1	1	1	1	1	1	1	1	1	1	1	1	1	1	1	1	1	1
15:05:51.531	1	1	1	1	1	1	1	1	1	1	1	1	1	1	1	1	1	1	1
15:05:52.504	1	1	1	1	1	1	1	1	1	1	1	1	1	1	1	1	1	1	1
15:05:53.484	1	1	1	1	1	1	1	1	1	1	1	1	1	1	1	1	1	1	1
15:05:54.461	1	1	1	1	1	1	1	1	1	1	1	1	1	1	1	1	1	1	1
15:05:55.431	1	1	1	1	1	1	1	1	1	1	1	1	1	1	1	1	1	1	1
15:05:56.417	1	1	1	1	1	1	1	1	1	1	1	1	1	1	1	1	1	1	1
15:05:57.394	1	1	1	1	1	1	1	1	1	1	1	1	1	1	1	1	1	1	1
15:05:58.375	1	1	1	1	1	1	1	1	1	1	1	1	1	1	1	1	1	1	1
15:05:59.340	1	1	1	1	1	1	1	1	1	1	1	1	1	1	1	1	1	1	1
15:06:00.326	1	1	1	1	1	1	1	1	1	1	1	1	1	1	1	1	1	1	1
15:07:15.976	1	1	1	1	1	1	1	1	1	1	1	1	1	1	1	1	1	1	1
15:07:16.959	1	1	1	1	1	1	1	1	1	1	1	1	1	1	1	1	1	1	1
15:07:17.940	1	1	1	1	1	1	1	1	1	1	1	1	1	1	1	1	1	1	1
15:07:18.912	1	1	1	1	1	1	1	1	1	1	1	1	1	1	1	1	1	1	1
15:07:19.891	1	1	1	1	1	1	1	1	1	1	1	1	1	1	1	1	1	1	1
15:07:20.872	1	1	1	1	1	1	1	1	1	1	1	1	1	1	1	1	1	1	1
15:07:21.839	1	1	1	1	1	1	1	1	1	1	1	1	1	1	1	1	1	1	1
15:07:22.828	1	1	1	1	1	1	1	1	1	1	1	1	1	1	1	1	1	1	1
15:07:23.803	1	1	1	1	1	1	1	1	1	1	1	1	1	1	1	1	1	1	1
15:07:24.780	1	1	1	1	1	1	1	1	1	1	1	1	1	1	1	1	1	1	1
15:07:25.755	1	1	1	1	1	1	1	1	1	1	1	1	1	1	1	1	1	1	1
15:07:26.735	1	1	1	1	1	1	1	1	1	1	1	1	1	1	1	1	1	1	1
15:07:27.702	1	1	1	1	1	1	1	1	1	1	1	1	1	1	1	1	1	1	1
15:07:28.683	1	1	1	1	1	1	1	1	1	1	1	1	1	1	1	1	1	1	1
15:07:29.657	1	1	1	1	1	1	1	1	1	1	1	1	1	1	1	1	1	1	1
15:07:30.644	1	1	1	1	1	1	1	1	1	1	1	1	1	1	1	1	1	1	1
15:07:31.616	1	1	1	1	1	1	1	1	1	1	1	1	1	1	1	1	1	1	1
15:07:32.591	1	1	1	1	1	1	1	1	1	1	1	1	1	1	1	1	1	1	1
15:07:33.555	1	1	1	1	1	1	1	1	1	1	1	1	1	1	1	1	1	1	1
15:07:34.548	1	1	1	1	1	1	1	1	1	1	1	1	1	1	1	1	1	1	1
15:07:35.516	1	1	1	1	1	1	1	1	1	1	1	1	1	1	1	1	1	1	1
15:07:36.503	1	1	1	1	1	1	1	1	1	1	1	1	1	1	1	1	1	1	1
15:07:37.474	1	1	1	1	1	1	1	1	1	1	1	1	1	1	1	1	1	1	1
15:07:38.441	1	1	1	1	1	1	1	1	1	1	1	1	1	1	1	1	1	1	1
15:07:39.411	1	1	1	1	1	1	1	1	1	1	1	1	1	1	1	1	1	1	1
15:07:40.403	1	1	1	1	1	1	1	1	1	1	1	1	1	1	1	1	1	1	1
15:07:41.367	1	1	1	1	1	1	1	1	1	1	1	1	1	1	1	1	1	1	1
15:07:42.352	1	1	1	1	1	1	1	1	1	1	1	1	1	1	1	1	1	1	1
15:07:43.329	1	1	1	1	1	1	1	1	1	1	1	1	1	1	1	1	1	1	1
15:07:44.304	1	1	1	1	1	1	1	1	1	1	1	1	1	1	1	1	1	1	1
15:07:45.283	1	1	1	1	1	1	1	1	1	1	1	1	1	1	1	1	1	1	1
15:07:46.259	1	1	1	1	1	1	1	1	1	1	1	1	1	1	1	1	1	1	1
15:07:47.244	1	1	1	1	1	1	1	1	1	1	1	1	1	1	1	1	1	1	1
15:07:48.208	1	1	1	1	1	1	1	1	1	1	1	1	1	1	1	1	1	1	1
15:07:49.193	1	1	1	1	1	1	1	1	1	1	1	1	1	1	1	1	1	1	1
15:07:50.163	1	1	1	1	1	1	1	1	1	1	1	1	1	1	1	1	1	1	1
15:07:51.148	1	1	1	1	1	1	1	1	1	1	1	1	1	1	1	1	1	1	1
15:07:52.122	1	1	1	1	1	1	1	1	1	1	1	1	1	1	1	1	1	1	1
15:07:53.093	1	1	1	1	1	1	1	1	1	1	1	1	1	1	1	1	1	1	1
15:07:54.073	1	1	1	1	1	1	1	1	1	1	1	1	1	1	1	1	1	1	1
15:07:55.055	1	1	1	1	1	1	1	1	1	1	1	1	1	1	1	1	1	1	1
15:07:56.026	1	1	1	1	1	1	1	1	1	1	1	1	1	1	1	1	1	1	1
15:07:57.001	1	1	1	1	1	1	1	1	1	1	1	1	1	1	1	1	1	1	1
15:07:57.982	1	1	1	1	1	1	1	1	1	1	1	1	1	1	1	1	1	1	1
15:07:58.962	1	1	1	1	1	1	1	1	1	1	1	1	1	1	1	1	1	1	1
15:07:59.931	1	1	1	1	1	1	1	1	1	1	1	1	1	1	1	1	1	1	1
15:09:15.406	1	1	1	1	1	1	1	1	1	1	1	1	1	1	1	1	1	1	1
15:09:16.381	1	1	1	1	1	1	1	1	1	1	1	1	1	1	1	1	1	1	1
15:09:17.349	1	1	1	1	1	1	1	1	1	1	1	1	1	1	1	1	1	1	1
15:09:18.325	1	1	1	1	1	1	1	1	1	1	1	1	1	1	1	1	1	1	1
15:09:19.310	1	1	1	1	1	1	1	1	1	1	1	1	1	1	1	1	1	1	1
15:09:20.273	1	1	1	1	1	1	1	1	1	1	1	1	1	1	1	1	1	1	1
15:09:21.260	1	1	1	1	1	1	1	1	1	1	1	1	1	1	1	1	1	1	1
15:09:22.236	1	1	1	1	1	1	1	1	1	1	1	1	1	1	1	1	1	1	1
15:09:23.207	1	1	1	1	1	1	1	1	1	1	1	1	1	1	1	1	1	1	1
15:09:24.188	1	1	1	1	1	1	1	1	1	1	1	1	1	1	1	1	1	1	1
15:09:25.158	1	1	1	1	1	1	1	1	1	1	1	1	1	1	1	1	1	1	1
15:09:26.148	1	1	1	1	1	1	1	1	1	1	1	1	1	1	1	1	1	1	1
15:09:27.122	1	1	1	1	1	1	1	1	1	1	1	1	1	1	1	1	1	1	1
15:09:28.091	1	1	1	1	1	1	1	1	1	1	1	1	1	1	1	1	1	1	1
15:09:29.077	1	1	1	1	1	1	1	1	1	1	1	1	1	1	1	1	1	1	1
15:09:30.045	1	1	1	1	1	1	1	1	1	1	1	1	1	1	1	1	1	1	1
15:09:31.029	1	1	1	1	1	1	1	1	1	1	1	1	1	1	1	1	1	1	1
15:09:32.006	1	1	1	1	1	1	1	1	1	1	1	1	1	1	1	1	1	1	1
15:09:32.978	1	1	1	1	1	1	1	1	1	1	1	1	1	1	1	1	1	1	1
15:09:33.963	1	1	1	1	1	1	1	1	1	1	1	1	1	1	1	1	1	1	1
15:09:34.927	1	1	1	1	1	1	1	1	1	1	1	1	1	1	1	1	1	1	1
15:09:35.914	1	1	1	1	1	1	1	1	1	1	1	1	1	1	1	1	1	1	1
15:09:36.893	1	1	1	1	1	1	1	1	1	1	1	1	1	1	1	1	1	1	1
15:09:37.857	1	1	1	1	1	1	1	1	1	1	1	1	1	1	1	1	1	1	1
15:09:38.833	1	1	1	1	1	1	1	1	1	1	1	1	1	1	1	1	1	1	1
15:09:39.825	1	1	1	1	1	1	1	1	1	1	1	1	1	1	1	1	1	1	1
15:09:40.797	1	1	1	1	1	1	1	1	1	1	1	1	1	1	1	1	1	1	1
15:09:41.767	1	1	1	1	1	1	1	1	1	1	1	1	1	1	1	1	1	1	1
15:09:42.737	1	1	1	1	1	1	1	1	1	1	1	1	1	1	1	1	1	1	1
15:09:43.728	1	1	1	1	1	1	1	1	1	1	1	1	1	1	1	1	1	1	1
15:09:44.693	1	1	1	1	1	1	1	1	1	1	1	1	1	1	1	1	1	1	1
15:09:45.674	1	1	1	1	1	1	1	1	1	1	1	1	1	1	1	1	1	1	1
15:09:46.655	1	1	1	1	1	1	1	1	1	1	1	1	1	1	1	1	1	1	1
15:09:47.630	1	1	1	1	1	1	1	1	1	1	1	1	1	1	1	1	1	1	1
15:09:48.600	1	1	1	1	1	1	1	1	1	1	1	1	1	1	1	1	1	1	1
15:09:49.586	1	1	1	1	1	1	1	1	1	1	1	1	1	1	1	1	1	1	1
15:09:50.560	1	1	1	1	1	1	1	1	1	1	1	1	1	1	1	1	1	1	1
15:09:51.530	1	1	1	1	1	1	1	1	1	1	1	1	1	1	1	1	1	1	1
15:09:52.505	1	1	1	1	1	1	1	1	1	1	1	1	1	1	1	1	1	1	1
15:09:53.492	1	1	1	1	1	1	1	1	1	1	1	1	1	1	1	1	1	1	1
15:09:54.467	1	1	1	1	1	1	1	1	1	1	1	1	1	1	1	1	1	1	1
15:09:55.442	1	1	1	1	1	1	1	1	1	1	1	1	1	1	1	1	1	1	1
15:09:56.417	1	1	1	1	1	1	1	1	1	1	1	1	1	1	1	1	1	1	1
15:09:57.392	1	1	1	1	1	1	1	1	1	1	1	1	1	1	1	1	1	1	1
15:09:58.367	1	1	1	1	1	1	1	1	1	1	1	1	1	1	1	1	1	1	1
15:09:59.337	1	1	1	1	1	1	1	1	1	1	1	1	1	1	1	1	1	1	1
15:11:15.392	1	1	1	1	1	1	1	1	1	1	1	1	1	1	1	1	1	1	1
15:11:16.372	1	1	1	1	1	1	1	1	1	1	1	1	1	1	1	1	1	1	1
15:11:17.348	1	1	1	1	1	1	1	1	1	1	1	1	1	1	1	1	1	1	1
15:11:18.326	1	1	1	1	1	1	1	1	1	1	1	1	1	1	1	1	1	1	1
15:11:19.307	1	1	1	1	1	1	1	1	1	1	1	1	1	1	1	1	1	1	1
15:11:20.281	1	1	1	1	1	1	1	1	1	1	1	1	1	1	1	1	1	1	1
15:11:21.261	1	1	1	1	1	1	1	1	1	1	1	1	1	1	1	1	1	1	1
15:11:22.234	1	1	1	1	1	1	1	1	1	1	1	1	1	1	1	1	1	1	1
15:11:23.208	1	1	1	1	1	1	1	1	1	1	1	1	1	1	1	1	1	1	1
15:11:24.185	1	1	1	1	1	1	1	1	1	1	1	1	1	1	1	1	1	1	1
15:11:25.162	1	1	1	1	1	1	1	1	1	1	1	1	1	1	1	1	1	1	1
15:11:26.142	1	1	1	1	1	1	1	1	1	1	1	1	1	1	1	1	1	1	1
15:11:27.117	1	1	1	1	1	1	1	1	1	1	1	1	1	1	1	1	1	1	1
15:11:28.089	1	1	1	1	1	1	1	1	1	1	1	1	1	1	1	1	1	1	1
15:11:29.071	1	1	1	1	1	1	1	1	1	1	1	1	1	1	1	1	1	1	1
15:11:30.040	1	1	1	1	1	1	1	1	1	1	1	1	1	1	1	1	1	1	1
15:11:31.022	1	1	1	1	1	1	1	1	1	1	1	1	1	1	1	1	1	1	1
15:11:31.996	1	1	1	1	1	1	1	1	1	1	1	1	1	1	1	1	1	1	1
15:11:32.976	1	1	1	1	1	1	1	1	1	1	1	1	1	1	1	1	1	1	1
15:11:33.952	1	1	1	1	1	1	1	1	1	1	1	1	1	1	1	1	1	1	1
15:11:34.921	1	1	1	1	1	1	1	1	1	1	1	1	1	1	1	1	1	1	1
15:11:35.900	1	1	1	1	1	1	1	1	1	1	1	1	1	1	1	1	1	1	1
15:11:36.878	1	1	1	1	1	1	1	1	1	1	1	1	1	1	1	1	1	1	1
15:11:37.848	1	1	1	1	1	1	1	1	1	1	1	1	1	1	1	1	1	1	1
15:11:38.838	1	1	1	1	1	1	1	1	1	1	1	1	1	1	1	1	1	1	1
15:11:39.807	1	1	1	1	1	1	1	1	1	1	1	1	1	1	1	1	1	1	1
15:11:40.793	1	1	1	1	1	1	1	1	1	1	1	1	1	1	1	1	1	1	1
15:11:41.762	1	1	1	1	1	1	1	1	1	1	1	1	1	1	1	1	1	1	1
15:11:42.737	1	1	1	1	1	1	1	1	1	1	1	1	1	1	1	1	1	1	1
15:11:43.715	1	1	1	1	1	1	1	1	1	1	1	1	1	1	1	1	1	1	1
15:11:44.696	1	1	1	1	1	1	1	1	1	1	1	1	1	1	1	1	1	1	1
15:11:45.666	1	1	1	1	1	1	1	1	1	1	1	1	1	1	1	1	1	1	1
15:11:46.653	1	1	1	1	1	1	1	1	1	1	1	1	1	1	1	1	1	1	1
15:11:47.624	1	1	1	1	1	1	1	1	1	1	1	1	1	1	1	1	1	1	1
15:11:48.595	1	1	1	1	1	1	1	1	1	1	1	1	1	1	1	1	1	1	1
15:11:49.569	1	1	1	1	1	1	1	1	1	1	1	1	1	1	1	1	1	1	1
15:11:50.548	1	1	1	1	1	1	1	1	1	1	1	1	1	1	1	1	1	1	1
15:11:51.530	1	1	1	1	1	1	1	1	1	1	1	1	1	1	1	1	1	1	1
15:11:52.498	1	1	1	1	1	1	1	1	1	1	1	1	1	1	1	1	1	1	1
15:11:53.473	1	1	1	1	1	1	1	1	1	1	1	1	1	1	1	1	1	1	1
15:11:54.464	1	1	1	1	1	1	1	1	1	1	1	1	1	1	1	1	1	1	1
15:11:55.433	1	1	1	1	1	1	1	1	1	1	1	1	1	1	1	1	1	1	1
15:11:56.408	1	1	1	1	1	1	1	1	1	1	1	1	1	1	1	1	1	1	1
15:11:57.384	1	1	1	1	1	1	1	1	1	1	1	1	1	1	1	1	1	1	1
15:11:58.372	1	1	1	1	1	1	1	1	1	1	1	1	1	1	1	1	1	1	1
15:11:59.339	1	1	1	1	1	1	1	1	1	1	1	1	1	1	1	1	1	1	1
15:12:00.325	1	1	1	1	1	1	1	1	1	1	1	1	1	1	1	1	1	1	1
15:13:15.838	1	1	1	1	1	1	1	1	1	1	1	1	1	1	1	1	1	1	1
15:13:16.818	1	1	1	1	1	1	1	1	1	1	1	1	1	1	1	1	1	1	1
15:13:17.790	1	1	1	1	1	1	1	1	1	1	1	1	1	1	1	1	1	1	1
15:13:18.774	1	1	1	1	1	1	1	1	1	1	1	1	1	1	1	1	1	1	1
15:13:19.739	1	1	1	1	1	1	1	1	1	1	1	1	1	1	1	1	1	1	1
15:13:20.725	1	1	1	1	1	1	1	1	1	1	1	1	1	1	1	1	1	1	1
15:13:21.694	1	1	1	1	1	1	1	1	1	1	1	1	1	1	1	1	1	1	1
15:13:22.664	1	1	1	1	1	1	1	1	1	1	1	1	1	1	1	1	1	1	1
15:13:23.657	1	1	1	1	1	1	1	1	1	1	1	1	1	1	1	1	1	1	1
15:13:24.620	1	1	1	1	1	1	1	1	1	1	1	1	1	1	1	1	1	1	1
15:13:25.605	1	1	1	1	1	1	1	1	1	1	1	1	1	1	1	1	1	1	1
15:13:26.572	1	1	1	1	1	1	1	1	1	1	1	1	1	1	1	1	1	1	1
15:13:27.553	1	1	1	1	1	1	1	1	1	1	1	1	1	1	1	1	1	1	1
15:13:28.525	1	1	1	1	1	1	1	1	1	1	1	1	1	1	1	1	1	1	1
15:13:29.504	1	1	1	1	1	1	1	1	1	1	1	1	1	1	1	1	1	1	1
15:13:30.485	1	1	1	1	1	1	1	1	1	1	1	1	1	1	1	1	1	1	1
15:13:31.472	1	1	1	1	1	1	1	1	1	1	1	1	1	1	1	1	1	1	1
15:13:32.445	1	1	1	1	1	1	1	1	1	1	1	1	1	1	1	1	1	1	1
15:13:33.414	1	1	1	1	1	1	1	1	1	1	1	1	1	1	1	1	1	1	1
15:13:34.388	1	1	1	1	1	1	1	1	1	1	1	1	1	1	1	1	1	1	1
15:13:35.367	1	1	1	1	1	1	1	1	1	1	1	1	1	1	1	1	1	1	1
15:13:36.340	1	1	1	1	1	1	1	1	1	1	1	1	1	1	1	1	1	1	1
15:13:37.312	1	1	1	1	1	1	1	1	1	1	1	1	1	1	1	1	1	1	1
15:13:38.297	1	1	1	1	1	1	1	1	1	1	1	1	1	1	1	1	1	1	1
15:13:39.266	1	1	1	1	1	1	1	1	1	1	1	1	1	1	1	1	1	1	1
15:13:40.258	1	1	1	1	1	1	1	1	1	1	1	1	1	1	1	1	1	1	1
15:13:41.228	1	1	1	1	1	1	1	1	1	1	1	1	1	1	1	1	1	1	1
15:13:42.209	1	1	1	1	1	1	1	1	1	1	1	1	1	1	1	1	1	1	1
15:13:43.180	1	1	1	1	1	1	1	1	1	1	1	1	1	1	1	1	1	1	1
15:13:44.152	1	1	1	1	1	1	1	1	1	1	1	1	1	1	1	1	1	1	1
15:13:45.127	1	1	1	1	1	1	1	1	1	1	1	1	1	1	1	1	1	1	1
15:13:46.107	1	1	1	1	1	1	1	1	1	1	1	1	1	1	1	1	1	1	1
15:13:47.082	1	1	1	1	1	1	1	1	1	1	1	1	1	1	1	1	1	1	1
15:13:48.073	1	1	1	1	1	1	1	1	1	1	1	1	1	1	1	1	1	1	1
15:13:49.046	1	1	1	1	1	1	1	1	1	1	1	1	1	1	1	1	1	1	1
15:13:50.025	1	1	1	1	1	1	1	1	1	1	1	1	1	1	1	1	1	1	1
15:13:50.986	1	1	1	1	1	1	1	1	1	1	1	1	1	1	1	1	1	1	1
15:13:51.973	1	1	1	1	1	1	1	1	1	1	1	1	1	1	1	1	1	1	1
15:13:52.939	1	1	1	1	1	1	1	1	1	1	1	1	1	1	1	1	1	1	1
15:13:53.924	1	1	1	1	1	1	1	1	1	1	1	1	1	1	1	1	1	1	1
15:13:54.896	1	1	1	1	1	1	1	1	1	1	1	1	1	1	1	1	1	1	1
15:13:55.875	1	1	1	1	1	1	1	1	1	1	1	1	1	1	1	1	1	1	1
15:13:56.850	1	1	1	1	1	1	1	1	1	1	1	1	1	1	1	1	1	1	1
15:13:57.826	1	1	1	1	1	1	1	1	1	1	1	1	1	1	1	1	1	1	1
15:13:58.807	1	1	1	1	1	1	1	1	1	1	1	1	1	1	1	1	1	1	1
15:13:59.782	1	1	1	1	1	1	1	1	1	1	1	1	1	1	1	1	1	1	1
15:15:15.438	1	1	1	1	1	1	1	1	1	1	1	1	1	1	1	1	1	1	1
15:15:16.407	1	1	1	1	1	1	1	1	1	1	1	1	1	1	1	1	1	1	1
15:15:17.392	1	1	1	1	1	1	1	1	1	1	1	1	1	1	1	1	1	1	1
15:15:18.371	1	1	1	1	1	1	1	1	1	1	1	1	1	1	1	1	1	1	1
15:15:19.341	1	1	1	1	1	1	1	1	1	1	1	1	1	1	1	1	1	1	1
15:15:20.326	1	1	1	1	1	1	1	1	1	1	1	1	1	1	1	1	1	1	1
15:15:21.295	1	1	1	1	1	1	1	1	1	1	1	1	1	1	1	1	1	1	1
15:15:22.274	1	1	1	1	1	1	1	1	1	1	1	1	1	1	1	1	1	1	1
15:15:23.243	1	1	1	1	1	1	1	1	1	1	1	1	1	1	1	1	1	1	1
15:15:24.228	1	1	1	1	1	1	1	1	1	1	1	1	1	1	1	1	1	1	1
15:15:25.197	1	1	1	1	1	1	1	1	1	1	1	1	1	1	1	1	1	1	1
15:15:26.176	1	1	1	1	1	1	1	1	1	1	1	1	1	1	1	1	1	1	1
15:15:27.146	1	1	1	1	1	1	1	1	1	1	1	1	1	1	1	1	1	1	1
15:15:28.131	1	1	1	1	1	1	1	1	1	1	1	1	1	1	1	1	1	1	1
15:15:29.107	1	1	1	1	1	1	1	1	1	1	1	1	1	1	1	1	1	1	1
15:15:30.083	1	1	1	1	1	1	1	1	1	1	1	1	1	1	1	1	1	1	1
15:15:31.058	1	1	1	1	1	1	1	1	1	1	1	1	1	1	1	1	1	1	1
15:15:32.027	1	1	1	1	1	1	1	1	1	1	1	1	1	1	1	1	1	1	1
15:15:33.022	1	1	1	1	1	1	1	1	1	1	1	1	1	1	1	1	1	1	1
15:15:33.994	1	1	1	1	1	1	1	1	1	1	1	1	1	1	1	1	1	1	1
15:15:34.974	1	1	1	1	1	1	1	1	1	1	1	1	1	1	1	1	1	1	1
15:15:35.947	1	1	1	1	1	1	1	1	1	1	1	1	1	1	1	1	1	1	1
15:15:36.915	1	1	1	1	1	1	1	1	1	1	1	1	1	1	1	1	1	1	1
15:15:37.889	1	1	1	1	1	1	1	1	1	1	1	1	1	1	1	1	1	1	1
15:15:38.875	1	1	1	1	1	1	1	1	1	1	1	1	1	1	1	1	1	1	1
15:15:39.845	1	1	1	1	1	1	1	1	1	1	1	1	1	1	1	1	1	1	1
15:15:40.829	1	1	1	1	1	1	1	1	1	1	1	1	1	1	1	1	1	1	1
15:15:41.798	1	1	1	1	1	1	1	1	1	1	1	1	1	1	1	1	1	1	1
15:15:42.783	1	1	1	1	1	1	1	1	1	1	1	1	1	1	1	1	1	1	1
15:15:43.752	1	1	1	1	1	1	1	1	1	1	1	1	1	1	1	1	1	1	1
15:15:44.737	1	1	1	1	1	1	1	1	1	1	1	1	1	1	1	1	1	1	1
15:15:45.707	1	1	1	1	1	1	1	1	1	1	1	1	1	1	1	1	1	1	1
15:15:46.685	1	1	1	1	1	1	1	1	1	1	1	1	1	1	1	1	1	1	1
15:15:47.655	1	1	1	1	1	1	1	1	1	1	1	1	1	1	1	1	1	1	1
15:15:48.627	1	1	1	1	1	1	1	1	1	1	1	1	1	1	1	1	1	1	1
15:15:49.619	1	1	1	1	1	1	1	1	1	1	1	1	1	1	1	1	1	1	1
15:15:50.590	1	1	1	1	1	1	1	1	1	1	1	1	1	1	1	1	1	1	1
15:15:51.570	1	1	1	1	1	1	1	1	1	1	1	1	1	1	1	1	1	1	1
15:15:52.549	1	1	1	1	1	1	1	1	1	1	1	1	1	1	1	1	1	1	1
15:15:53.517	1	1	1	1	1	1	1	1	1	1	1	1	1	1	1	1	1	1	1
15:15:54.493	1	1	1	1	1	1	1	1	1	1	1	1	1	1	1	1	1	1	1
15:15:55.482	1	1	1	1	1	1	1	1	1	1	1	1	1	1	1	1	1	1	1
15:15:56.442	1	1	1	1	1	1	1	1	1	1	1	1	1	1	1	1	1	1	1
15:15:57.425	1	1	1	1	1	1	1	1	1	1	1	1	1	1	1	1	1	1	1
15:15:58.393	1	1	1	1	1	1	1	1	1	1	1	1	1	1	1	1	1	1	1
15:15:59.384	1	1	1	1	1	1	1	1	1	1	1	1	1	1	1	1	1	1	1
15:16:00.355	1	1	1	1	1	1	1	1	1	1	1	1	1	1	1	1	1	1	1
15:17:15.859	1	1	1	1	1	1	1	1	1	1	1	1	1	1	1	1	1	1	1
15:17:16.849	1	1	1	1	1	1	1	1	1	1	1	1	1	1	1	1	1	1	1
15:17:17.821	1	1	1	1	1	1	1	1	1	1	1	1	1	1	1	1	1	1	1
15:17:18.797	1	1	1	1	1	1	1	1	1	1	1	1	1	1	1	1	1	1	1
15:17:19.778	1	1	1	1	1	1	1	1	1	1	1	1	1	1	1	1	1	1	1
15:17:20.751	1	1	1	1	1	1	1	1	1	1	1	1	1	1	1	1	1	1	1
15:17:21.724	1	1	1	1	1	1	1	1	1	1	1	1	1	1	1	1	1	1	1
15:17:22.696	1	1	1	1	1	1	1	1	1	1	1	1	1	1	1	1	1	1	1
15:17:23.676	1	1	1	1	1	1	1	1	1	1	1	1	1	1	1	1	1	1	1
15:17:24.649	1	1	1	1	1	1	1	1	1	1	1	1	1	1	1	1	1	1	1
15:17:25.629	1	1	1	1	1	1	1	1	1	1	1	1	1	1	1	1	1	1	1
15:17:26.609	1	1	1	1	1	1	1	1	1	1	1	1	1	1	1	1	1	1	1
15:17:27.591	1	1	1	1	1	1	1	1	1	1	1	1	1	1	1	1	1	1	1
15:17:28.553	1	1	1	1	1	1	1	1	1	1	1	1	1	1	1	1	1	1	1
15:17:29.539	1	1	1	1	1	1	1	1	1	1	1	1	1	1	1	1	1	1	1
15:17:30.505	1	1	1	1	1	1	1	1	1	1	1	1	1	1	1	1	1	1	1
15:17:31.486	1	1	1	1	1	1	1	1	1	1	1	1	1	1	1	1	1	1	1
15:17:32.455	1	1	1	1	1	1	1	1	1	1	1	1	1	1	1	1	1	1	1
15:17:33.442	1	1	1	1	1	1	1	1	1	1	1	1	1	1	1	1	1	1	1
15:17:34.407	1	1	1	1	1	1	1	1	1	1	1	1	1	1	1	1	1	1	1
15:17:35.400	1	1	1	1	1	1	1	1	1	1	1	1	1	1	1	1	1	1	1
15:17:36.378	1	1	1	1	1	1	1	1	1	1	1	1	1	1	1	1	1	1	1
15:17:37.340	1	1	1	1	1	1	1	1	1	1	1	1	1	1	1	1	1	1	1
15:17:38.325	1	1	1	1	1	1	1	1	1	1	1	1	1	1	1	1	1	1	1
15:17:39.304	1	1	1	1	1	1	1	1	1	1	1	1	1	1	1	1	1	1	1
15:17:40.273	1	1	1	1	1	1	1	1	1	1	1	1	1	1	1	1	1	1	1
15:17:41.243	1	1	1	1	1	1	1	1	1	1	1	1	1	1	1	1	1	1	1
15:17:42.227	1	1	1	1	1	1	1	1	1	1	1	1	1	1	1	1	1	1	1
15:17:43.206	1	1	1	1	1	1	1	1	1	1	1	1	1	1	1	1	1	1	1
15:17:44.191	1	1	1	1	1	1	1	1	1	1	1	1	1	1	1	1	1	1	1
15:17:45.161	1	1	1	1	1	1	1	1	1	1	1	1	1	1	1	1	1	1	1
15:17:46.145	1	1	1	1	1	1	1	1	1	1	1	1	1	1	1	1	1	1	1
15:17:47.109	1	1	1	1	1	1	1	1	1	1	1	1	1	1	1	1	1	1	1
15:17:48.088	1	1	1	1	1	1	1	1	1	1	1	1	1	1	1	1	1	1	1
15:17:49.066	1	1	1	1	1	1	1	1	1	1	1	1	1	1	1	1	1	1	1
15:17:50.041	1	1	1	1	1	1	1	1	1	1	1	1	1	1	1	1	1	1	1
15:17:51.011	1	1	1	1	1	1	1	1	1	1	1	1	1	1	1	1	1	1	1
15:17:52.006	1	1	1	1	1	1	1	1	1	1	1	1	1	1	1	1	1	1	1
15:17:52.971	1	1	1	1	1	1	1	1	1	1	1	1	1	1	1	1	1	1	1
15:17:53.945	1	1	1	1	1	1	1	1	1	1	1	1	1	1	1	1	1	1	1
15:17:54.915	1	1	1	1	1	1	1	1	1	1	1	1	1	1	1	1	1	1	1
15:17:55.899	1	1	1	1	1	1	1	1	1	1	1	1	1	1	1	1	1	1	1
15:17:56.870	1	1	1	1	1	1	1	1	1	1	1	1	1	1	1	1	1	1	1
15:17:57.861	1	1	1	1	1	1	1	1	1	1	1	1	1	1	1	1	1	1	1
15:17:58.837	1	1	1	1	1	1	1	1	1	1	1	1	1	1	1	1	1	1	1
15:17:59.804	1	1	1	1	1	1	1	1	1	1	1	1	1	1	1	1	1	1	1
15:19:15.567	1	1	1	1	1	1	1	1	1	1	1	1	1	1	1	1	1	1	1
15:19:16.543	1	1	1	1	1	1	1	1	1	1	1	1	1	1	1	1	1	1	1
15:19:17.516	1	1	1	1	1	1	1	1	1	1	1	1	1	1	1	1	1	1	1
15:19:18.498	1	1	1	1	1	1	1	1	1	1	1	1	1	1	1	1	1	1	1
15:19:19.469	1	1	1	1	1	1	1	1	1	1	1	1	1	1	1	1	1	1	1
15:19:20.459	1	1	1	1	1	1	1	1	1	1	1	1	1	1	1	1	1	1	1
15:19:21.424	1	1	1	1	1	1	1	1	1	1	1	1	1	1	1	1	1	1	1
15:19:22.410	1	1	1	1	1	1	1	1	1	1	1	1	1	1	1	1	1	1	1
15:19:23.382	1	1	1	1	1	1	1	1	1	1	1	1	1	1	1	1	1	1	1
15:19:24.366	1	1	1	1	1	1	1	1	1	1	1	1	1	1	1	1	1	1	1
15:19:25.330	1	1	1	1	1	1	1	1	1	1	1	1	1	1	1	1	1	1	1
15:19:26.315	1	1	1	1	1	1	1	1	1	1	1	1	1	1	1	1	1	1	1
15:19:27.291	1	1	1	1	1	1	1	1	1	1	1	1	1	1	1	1	1	1	1
15:19:28.266	1	1	1	1	1	1	1	1	1	1	1	1	1	1	1	1	1	1	1
15:19:29.235	1	1	1	1	1	1	1	1	1	1	1	1	1	1	1	1	1	1	1
15:19:30.227	1	1	1	1	1	1	1	1	1	1	1	1	1	1	1	1	1	1	1
15:19:31.192	1	1	1	1	1	1	1	1	1	1	1	1	1	1	1	1	1	1	1
15:19:32.159	1	1	1	1	1	1	1	1	1	1	1	1	1	1	1	1	1	1	1
15:19:33.150	1	1	1	1	1	1	1	1	1	1	1	1	1	1	1	1	1	1	1
15:19:34.131	1	1	1	1	1	1	1	1	1	1	1	1	1	1	1	1	1	1	1
15:19:35.095	1	1	1	1	1	1	1	1	1	1	1	1	1	1	1	1	1	1	1
15:19:36.079	1	1	1	1	1	1	1	1	1	1	1	1	1	1	1	1	1	1	1
15:19:37.059	1	1	1	1	1	1	1	1	1	1	1	1	1	1	1	1	1	1	1
15:19:38.025	1	1	1	1	1	1	1	1	1	1	1	1	1	1	1	1	1	1	1
15:19:39.001	1	1	1	1	1	1	1	1	1	1	1	1	1	1	1	1	1	1	1
15:19:39.981	1	1	1	1	1	1	1	1	1	1	1	1	1	1	1	1	1	1	1
15:19:40.962	1	1	1	1	1	1	1	1	1	1	1	1	1	1	1	1	1	1	1
15:19:41.939	1	1	1	1	1	1	1	1	1	1	1	1	1	1	1	1	1	1	1
15:19:42.915	1	1	1	1	1	1	1	1	1	1	1	1	1	1	1	1	1	1	1
15:19:43.885	1	1	1	1	1	1	1	1	1	1	1	1	1	1	1	1	1	1	1
15:19:44.870	1	1	1	1	1	1	1	1	1	1	1	1	1	1	1	1	1	1	1
15:19:45.838	1	1	1	1	1	1	1	1	1	1	1	1	1	1	1	1	1	1	1
15:19:46.823	1	1	1	1	1	1	1	1	1	1	1	1	1	1	1	1	1	1	1
15:19:47.799	1	1	1	1	1	1	1	1	1	1	1	1	1	1	1	1	1	1	1
15:19:48.770	1	1	1	1	1	1	1	1	1	1	1	1	1	1	1	1	1	1	1
15:19:49.758	1	1	1	1	1	1	1	1	1	1	1	1	1	1	1	1	1	1	1
15:19:50.730	1	1	1	1	1	1	1	1	1	1	1	1	1	1	1	1	1	1	1
15:19:51.701	1	1	1	1	1	1	1	1	1	1	1	1	1	1	1	1	1	1	1
15:19:52.673	1	1	1	1	1	1	1	1	1	1	1	1	1	1	1	1	1	1	1
15:19:53.655	1	1	1	1	1	1	1	1	1	1	1	1	1	1	1	1	1	1	1
15:19:54.624	1	1	1	1	1	1	1	1	1	1	1	1	1	1	1	1	1	1	1
15:19:55.609	1	1	1	1	1	1	1	1	1	1	1	1	1	1	1	1	1	1	1
15:19:56.582	1	1	1	1	1	1	1	1	1	1	1	1	1	1	1	1	1	1	1
15:19:57.569	1	1	1	1	1	1	1	1	1	1	1	1	1	1	1	1	1	1	1
15:19:58.535	1	1	1	1	1	1	1	1	1	1	1	1	1	1	1	1	1	1	1
15:19:59.509	1	1	1	1	1	1	1	1	1	1	1	1	1	1	1	1	1	1	1
15:21:15.136	1	1	1	1	1	1	1	1	1	1	1	1	1	1	1	1	1	1	1
15:21:16.112	1	1	1	1	1	1	1	1	1	1	1	1	1	1	1	1	1	1	1
15:21:17.086	1	1	1	1	1	1	1	1	1	1	1	1	1	1	1	1	1	1	1
15:21:18.058	1	1	1	1	1	1	1	1	1	1	1	1	1	1	1	1	1	1	1
15:21:19.033	1	1	1	1	1	1	1	1	1	1	1	1	1	1	1	1	1	1	1
15:21:20.013	1	1	1	1	1	1	1	1	1	1	1	1	1	1	1	1	1	1	1
15:21:20.990	1	1	1	1	1	1	1	1	1	1	1	1	1	1	1	1	1	1	1
15:21:21.976	1	1	1	1	1	1	1	1	1	1	1	1	1	1	1	1	1	1	1
15:21:22.933	1	1	1	1	1	1	1	1	1	1	1	1	1	1	1	1	1	1	1
15:21:23.920	1	1	1	1	1	1	1	1	1	1	1	1	1	1	1	1	1	1	1
15:21:24.891	1	1	1	1	1	1	1	1	1	1	1	1	1	1	1	1	1	1	1
15:21:25.871	1	1	1	1	1	1	1	1	1	1	1	1	1	1	1	1	1	1	1
15:21:26.861	1	1	1	1	1	1	1	1	1	1	1	1	1	1	1	1	1	1	1
15:21:27.836	1	1	1	1	1	1	1	1	1	1	1	1	1	1	1	1	1	1	1
15:21:28.807	1	1	1	1	1	1	1	1	1	1	1	1	1	1	1	1	1	1	1
15:21:29.778	1	1	1	1	1	1	1	1	1	1	1	1	1	1	1	1	1	1	1
15:21:30.766	1	1	1	1	1	1	1	1	1	1	1	1	1	1	1	1	1	1	1
15:21:31.729	1	1	1	1	1	1	1	1	1	1	1	1	1	1	1	1	1	1	1
15:21:32.710	1	1	1	1	1	1	1	1	1	1	1	1	1	1	1	1	1	1	1
15:21:33.690	1	1	1	1	1	1	1	1	1	1	1	1	1	1	1	1	1	1	1
15:21:34.664	1	1	1	1	1	1	1	1	1	1	1	1	1	1	1	1	1	1	1
15:21:35.648	1	1	1	1	1	1	1	1	1	1	1	1	1	1	1	1	1	1	1
15:21:36.620	1	1	1	1	1	1	1	1	1	1	1	1	1	1	1	1	1	1	1
15:21:37.601	1	1	1	1	1	1	1	1	1	1	1	1	1	1	1	1	1	1	1
15:21:38.559	1	1	1	1	1	1	1	1	1	1	1	1	1	1	1	1	1	1	1
15:21:39.548	1	1	1	1	1	1	1	1	1	1	1	1	1	1	1	1	1	1	1
15:21:40.515	1	1	1	1	1	1	1	1	1	1	1	1	1	1	1	1	1	1	1
15:21:41.505	1	1	1	1	1	1	1	1	1	1	1	1	1	1	1	1	1	1	1
15:21:42.472	1	1	1	1	1	1	1	1	1	1	1	1	1	1	1	1	1	1	1
15:21:43.458	1	1	1	1	1	1	1	1	1	1	1	1	1	1	1	1	1	1	1
15:21:44.432	1	1	1	1	1	1	1	1	1	1	1	1	1	1	1	1	1	1	1
15:21:45.406	1	1	1	1	1	1	1	1	1	1	1	1	1	1	1	1	1	1	1
15:21:46.370	1	1	1	1	1	1	1	1	1	1	1	1	1	1	1	1	1	1	1
15:21:47.363	1	1	1	1	1	1	1	1	1	1	1	1	1	1	1	1	1	1	1
15:21:48.325	1	1	1	1	1	1	1	1	1	1	1	1	1	1	1	1	1	1	1
15:21:49.318	1	1	1	1	1	1	1	1	1	1	1	1	1	1	1	1	1	1	1
15:21:50.278	1	1	1	1	1	1	1	1	1	1	1	1	1	1	1	1	1	1	1
15:21:51.262	1	1	1	1	1	1	1	1	1	1	1	1	1	1	1	1	1	1	1
15:21:52.238	1	1	1	1	1	1	1	1	1	1	1	1	1	1	1	1	1	1	1
15:21:53.223	1	1	1	1	1	1	1	1	1	1	1	1	1	1	1	1	1	1	1
15:21:54.199	1	1	1	1	1	1	1	1	1	1	1	1	1	1	1	1	1	1	1
15:21:55.175	1	1	1	1	1	1	1	1	1	1	1	1	1	1	1	1	1	1	1
15:21:56.146	1	1	1	1	1	1	1	1	1	1	1	1	1	1	1	1	1	1	1
15:21:57.122	1	1	1	1	1	1	1	1	1	1	1	1	1	1	1	1	1	1	1
15:21:58.093	1	1	1	1	1	1	1	1	1	1	1	1	1	1	1	1	1	1	1
15:21:59.078	1	1	1	1	1	1	1	1	1	1	1	1	1	1	1	1	1	1	1
15:22:00.059	1	1	1	1	1	1	1	1	1	1	1	1	1	1	1	1	1	1	1
15:23:15.842	1	1	1	1	1	1	1	1	1	1	1	1	1	1	1	1	1	1	1
15:23:16.828	1	1	1	1	1	1	1	1	1	1	1	1	1	1	1	1	1	1	1
15:23:17.809	1	1	1	1	1	1	1	1	1	1	1	1	1	1	1	1	1	1	1
15:23:18.784	1	1	1	1	1	1	1	1	1	1	1	1	1	1	1	1	1	1	1
15:23:19.753	1	1	1	1	1	1	1	1	1	1	1	1	1	1	1	1	1	1	1
15:23:20.737	1	1	1	1	1	1	1	1	1	1	1	1	1	1	1	1	1	1	1
15:23:21.712	1	1	1	1	1	1	1	1	1	1	1	1	1	1	1	1	1	1	1
15:23:22.678	1	1	1	1	1	1	1	1	1	1	1	1	1	1	1	1	1	1	1
15:23:23.666	1	1	1	1	1	1	1	1	1	1	1	1	1	1	1	1	1	1	1
15:23:24.644	1	1	1	1	1	1	1	1	1	1	1	1	1	1	1	1	1	1	1
15:23:25.609	1	1	1	1	1	1	1	1	1	1	1	1	1	1	1	1	1	1	1
15:23:26.594	1	1	1	1	1	1	1	1	1	1	1	1	1	1	1	1	1	1	1
15:23:27.565	1	1	1	1	1	1	1	1	1	1	1	1	1	1	1	1	1	1	1
15:23:28.541	1	1	1	1	1	1	1	1	1	1	1	1	1	1	1	1	1	1	1
15:23:29.527	1	1	1	1	1	1	1	1	1	1	1	1	1	1	1	1	1	1	1
15:23:30.493	1	1	1	1	1	1	1	1	1	1	1	1	1	1	1	1	1	1	1
15:23:31.468	1	1	1	1	1	1	1	1	1	1	1	1	1	1	1	1	1	1	1
15:23:32.449	1	1	1	1	1	1	1	1	1	1	1	1	1	1	1	1	1	1	1
15:23:33.433	1	1	1	1	1	1	1	1	1	1	1	1	1	1	1	1	1	1	1
15:23:34.409	1	1	1	1	1	1	1	1	1	1	1	1	1	1	1	1	1	1	1
15:23:35.374	1	1	1	1	1	1	1	1	1	1	1	1	1	1	1	1	1	1	1
15:23:36.360	1	1	1	1	1	1	1	1	1	1	1	1	1	1	1	1	1	1	1
15:23:37.327	1	1	1	1	1	1	1	1	1	1	1	1	1	1	1	1	1	1	1
15:23:38.312	1	1	1	1	1	1	1	1	1	1	1	1	1	1	1	1	1	1	1
15:23:39.292	1	1	1	1	1	1	1	1	1	1	1	1	1	1	1	1	1	1	1
15:23:40.264	1	1	1	1	1	1	1	1	1	1	1	1	1	1	1	1	1	1	1
15:23:41.240	1	1	1	1	1	1	1	1	1	1	1	1	1	1	1	1	1	1	1
15:23:42.222	1	1	1	1	1	1	1	1	1	1	1	1	1	1	1	1	1	1	1
15:23:43.197	1	1	1	1	1	1	1	1	1	1	1	1	1	1	1	1	1	1	1
15:23:44.171	1	1	1	1	1	1	1	1	1	1	1	1	1	1	1	1	1	1	1
15:23:45.146	1	1	1	1	1	1	1	1	1	1	1	1	1	1	1	1	1	1	1
15:23:46.117	1	1	1	1	1	1	1	1	1	1	1	1	1	1	1	1	1	1	1
15:23:47.102	1	1	1	1	1	1	1	1	1	1	1	1	1	1	1	1	1	1	1
15:23:48.082	1	1	1	1	1	1	1	1	1	1	1	1	1	1	1	1	1	1	1
15:23:49.050	1	1	1	1	1	1	1	1	1	1	1	1	1	1	1	1	1	1	1
15:23:50.021	1	1	1	1	1	1	1	1	1	1	1	1	1	1	1	1	1	1	1
15:23:51.009	1	1	1	1	1	1	1	1	1	1	1	1	1	1	1	1	1	1	1
15:23:51.986	1	1	1	1	1	1	1	1	1	1	1	1	1	1	1	1	1	1	1
15:23:52.960	1	1	1	1	1	1	1	1	1	1	1	1	1	1	1	1	1	1	1
15:23:53.930	1	1	1	1	1	1	1	1	1	1	1	1	1	1	1	1	1	1	1
15:23:54.917	1	1	1	1	1	1	1	1	1	1	1	1	1	1	1	1	1	1	1
15:23:55.890	1	1	1	1	1	1	1	1	1	1	1	1	1	1	1	1	1	1	1
15:23:56.857	1	1	1	1	1	1	1	1	1	1	1	1	1	1	1	1	1	1	1
15:23:57.847	1	1	1	1	1	1	1	1	1	1	1	1	1	1	1	1	1	1	1
15:23:58.822	1	1	1	1	1	1	1	1	1	1	1	1	1	1	1	1	1	1	1
15:23:59.796	1	1	1	1	1	1	1	1	1	1	1	1	1	1	1	1	1	1	1
15:25:15.307	1	1	1	1	1	1	1	1	1	1	1	1	1	1	1	1	1	1	1
15:25:16.292	1	1	1	1	1	1	1	1	1	1	1	1	1	1	1	1	1	1	1
15:25:17.262	1	1	1	1	1	1	1	1	1	1	1	1	1	1	1	1	1	1	1
15:25:18.243	1	1	1	1	1	1	1	1	1	1	1	1	1	1	1	1	1	1	1
15:25:19.213	1	1	1	1	1	1	1	1	1	1	1	1	1	1	1	1	1	1	1
15:25:20.189	1	1	1	1	1	1	1	1	1	1	1	1	1	1	1	1	1	1	1
15:25:21.179	1	1	1	1	1	1	1	1	1	1	1	1	1	1	1	1	1	1	1
15:25:22.143	1	1	1	1	1	1	1	1	1	1	1	1	1	1	1	1	1	1	1
15:25:23.126	1	1	1	1	1	1	1	1	1	1	1	1	1	1	1	1	1	1	1
15:25:24.096	1	1	1	1	1	1	1	1	1	1	1	1	1	1	1	1	1	1	1
15:25:25.075	1	1	1	1	1	1	1	1	1	1	1	1	1	1	1	1	1	1	1
15:25:26.055	1	1	1	1	1	1	1	1	1	1	1	1	1	1	1	1	1	1	1
15:25:27.025	1	1	1	1	1	1	1	1	1	1	1	1	1	1	1	1	1	1	1
15:25:28.013	1	1	1	1	1	1	1	1	1	1	1	1	1	1	1	1	1	1	1
15:25:28.979	1	1	1	1	1	1	1	1	1	1	1	1	1	1	1	1	1	1	1
15:25:29.952	1	1	1	1	1	1	1	1	1	1	1	1	1	1	1	1	1	1	1
15:25:30.942	1	1	1	1	1	1	1	1	1	1	1	1	1	1	1	1	1	1	1
15:25:31.912	1	1	1	1	1	1	1	1	1	1	1	1	1	1	1	1	1	1	1
15:25:32.882	1	1	1	1	1	1	1	1	1	1	1	1	1	1	1	1	1	1	1
15:25:33.872	1	1	1	1	1	1	1	1	1	1	1	1	1	1	1	1	1	1	1
15:25:34.846	1	1	1	1	1	1	1	1	1	1	1	1	1	1	1	1	1	1	1
15:25:35.825	1	1	1	1	1	1	1	1	1	1	1	1	1	1	1	1	1	1	1
15:25:36.790	1	1	1	1	1	1	1	1	1	1	1	1	1	1	1	1	1	1	1
15:25:37.764	1	1	1	1	1	1	1	1	1	1	1	1	1	1	1	1	1	1	1
15:25:38.756	1	1	1	1	1	1	1	1	1	1	1	1	1	1	1	1	1	1	1
15:25:39.728	1	1	1	1	1	1	1	1	1	1	1	1	1	1	1	1	1	1	1
15:25:40.693	1	1	1	1	1	1	1	1	1	1	1	1	1	1	1	1	1	1	1
15:25:41.672	1	1	1	1	1	1	1	1	1	1	1	1	1	1	1	1	1	1	1
15:25:42.658	1	1	1	1	1	1	1	1	1	1	1	1	1	1	1	1	1	1	1
15:25:43.634	1	1	1	1	1	1	1	1	1	1	1	1	1	1	1	1	1	1	1
15:25:44.609	1	1	1	1	1	1	1	1	1	1	1	1	1	1	1	1	1	1	1
15:25:45.590	1	1	1	1	1	1	1	1	1	1	1	1	1	1	1	1	1	1	1
15:25:46.568	1	1	1	1	1	1	1	1	1	1	1	1	1	1	1	1	1	1	1
15:25:47.542	1	1	1	1	1	1	1	1	1	1	1	1	1	1	1	1	1	1	1
15:25:48.512	1	1	1	1	1	1	1	1	1	1	1	1	1	1	1	1	1	1	1
15:25:49.486	1	1	1	1	1	1	1	1	1	1	1	1	1	1	1	1	1	1	1
15:25:50.472	1	1	1	1	1	1	1	1	1	1	1	1	1	1	1	1	1	1	1
15:25:51.448	1	1	1	1	1	1	1	1	1	1	1	1	1	1	1	1	1	1	1
15:25:52.424	1	1	1	1	1	1	1	1	1	1	1	1	1	1	1	1	1	1	1
15:25:53.399	1	1	1	1	1	1	1	1	1	1	1	1	1	1	1	1	1	1	1
15:25:54.368	1	1	1	1	1	1	1	1	1	1	1	1	1	1	1	1	1	1	1
15:25:55.347	1	1	1	1	1	1	1	1	1	1	1	1	1	1	1	1	1	1	1
15:25:56.333	1	1	1	1	1	1	1	1	1	1	1	1	1	1	1	1	1	1	1
15:25:57.308	1	1	1	1	1	1	1	1	1	1	1	1	1	1	1	1	1	1	1
15:25:58.286	1	1	1	1	1	1	1	1	1	1	1	1	1	1	1	1	1	1	1
15:25:59.257	1	1	1	1	1	1	1	1	1	1	1	1	1	1	1	1	1	1	1
15:26:00.232	1	1	1	1	1	1	1	1	1	1	1	1	1	1	1	1	1	1	1
15:27:16.004	1	1	1	1	1	1	1	1	1	1	1	1	1	1	1	1	1	1	1
15:27:16.991	1	1	1	1	1	1	1	1	1	1	1	1	1	1	1	1	1	1	1
15:27:17.956	1	1	1	1	1	1	1	1	1	1	1	1	1	1	1	1	1	1	1
15:27:18.934	1	1	1	1	1	1	1	1	1	1	1	1	1	1	1	1	1	1	1
15:27:19.909	1	1	1	1	1	1	1	1	1	1	1	1	1	1	1	1	1	1	1
15:27:20.885	1	1	1	1	1	1	1	1	1	1	1	1	1	1	1	1	1	1	1
15:27:21.855	1	1	1	1	1	1	1	1	1	1	1	1	1	1	1	1	1	1	1
15:27:22.848	1	1	1	1	1	1	1	1	1	1	1	1	1	1	1	1	1	1	1
15:27:23.815	1	1	1	1	1	1	1	1	1	1	1	1	1	1	1	1	1	1	1
15:27:24.796	1	1	1	1	1	1	1	1	1	1	1	1	1	1	1	1	1	1	1
15:27:25.762	1	1	1	1	1	1	1	1	1	1	1	1	1	1	1	1	1	1	1
15:27:26.757	1	1	1	1	1	1	1	1	1	1	1	1	1	1	1	1	1	1	1
15:27:27.728	1	1	1	1	1	1	1	1	1	1	1	1	1	1	1	1	1	1	1
15:27:28.695	1	1	1	1	1	1	1	1	1	1	1	1	1	1	1	1	1	1	1
15:27:29.685	1	1	1	1	1	1	1	1	1	1	1	1	1	1	1	1	1	1	1
15:27:30.656	1	1	1	1	1	1	1	1	1	1	1	1	1	1	1	1	1	1	1
15:27:31.625	1	1	1	1	1	1	1	1	1	1	1	1	1	1	1	1	1	1	1
15:27:32.603	1	1	1	1	1	1	1	1	1	1	1	1	1	1	1	1	1	1	1
15:27:33.580	1	1	1	1	1	1	1	1	1	1	1	1	1	1	1	1	1	1	1
15:27:34.551	1	1	1	1	1	1	1	1	1	1	1	1	1	1	1	1	1	1	1
15:27:35.538	1	1	1	1	1	1	1	1	1	1	1	1	1	1	1	1	1	1	1
15:27:36.505	1	1	1	1	1	1	1	1	1	1	1	1	1	1	1	1	1	1	1
15:27:37.494	1	1	1	1	1	1	1	1	1	1	1	1	1	1	1	1	1	1	1
15:27:38.456	1	1	1	1	1	1	1	1	1	1	1	1	1	1	1	1	1	1	1
15:27:39.444	1	1	1	1	1	1	1	1	1	1	1	1	1	1	1	1	1	1	1
15:27:40.411	1	1	1	1	1	1	1	1	1	1	1	1	1	1	1	1	1	1	1
15:27:41.401	1	1	1	1	1	1	1	1	1	1	1	1	1	1	1	1	1	1	1
15:27:42.372	1	1	1	1	1	1	1	1	1	1	1	1	1	1	1	1	1	1	1
15:27:43.346	1	1	1	1	1	1	1	1	1	1	1	1	1	1	1	1	1	1	1
15:27:44.321	1	1	1	1	1	1	1	1	1	1	1	1	1	1	1	1	1	1	1
15:27:45.309	1	1	1	1	1	1	1	1	1	1	1	1	1	1	1	1	1	1	1
15:27:46.274	1	1	1	1	1	1	1	1	1	1	1	1	1	1	1	1	1	1	1
15:27:47.250	1	1	1	1	1	1	1	1	1	1	1	1	1	1	1	1	1	1	1
15:27:48.234	1	1	1	1	1	1	1	1	1	1	1	1	1	1	1	1	1	1	1
15:27:49.203	1	1	1	1	1	1	1	1	1	1	1	1	1	1	1	1	1	1	1
15:27:50.189	1	1	1	1	1	1	1	1	1	1	1	1	1	1	1	1	1	1	1
15:27:51.158	1	1	1	1	1	1	1	1	1	1	1	1	1	1	1	1	1	1	1
15:27:52.146	1	1	1	1	1	1	1	1	1	1	1	1	1	1	1	1	1	1	1
15:27:53.119	1	1	1	1	1	1	1	1	1	1	1	1	1	1	1	1	1	1	1
15:27:54.089	1	1	1	1	1	1	1	1	1	1	1	1	1	1	1	1	1	1	1
15:27:55.059	1	1	1	1	1	1	1	1	1	1	1	1	1	1	1	1	1	1	1
15:27:56.049	1	1	1	1	1	1	1	1	1	1	1	1	1	1	1	1	1	1	1
15:27:57.018	1	1	1	1	1	1	1	1	1	1	1	1	1	1	1	1	1	1	1
15:27:57.990	1	1	1	1	1	1	1	1	1	1	1	1	1	1	1	1	1	1	1
15:27:58.968	1	1	1	1	1	1	1	1	1	1	1	1	1	1	1	1	1	1	1
15:27:59.944	1	1	1	1	1	1	1	1	1	1	1	1	1	1	1	1	1	1	1
15:29:15.444	1	1	1	1	1	1	1	1	1	1	1	1	1	1	1	1	1	1	1
15:29:16.412	1	1	1	1	1	1	1	1	1	1	1	1	1	1	1	1	1	1	1
15:29:17.387	1	1	1	1	1	1	1	1	1	1	1	1	1	1	1	1	1	1	1
15:29:18.357	1	1	1	1	1	1	1	1	1	1	1	1	1	1	1	1	1	1	1
15:29:19.349	1	1	1	1	1	1	1	1	1	1	1	1	1	1	1	1	1	1	1
15:29:20.319	1	1	1	1	1	1	1	1	1	1	1	1	1	1	1	1	1	1	1
15:29:21.294	1	1	1	1	1	1	1	1	1	1	1	1	1	1	1	1	1	1	1
15:29:22.280	1	1	1	1	1	1	1	1	1	1	1	1	1	1	1	1	1	1	1
15:29:23.251	1	1	1	1	1	1	1	1	1	1	1	1	1	1	1	1	1	1	1
15:29:24.222	1	1	1	1	1	1	1	1	1	1	1	1	1	1	1	1	1	1	1
15:29:25.207	1	1	1	1	1	1	1	1	1	1	1	1	1	1	1	1	1	1	1
15:29:26.177	1	1	1	1	1	1	1	1	1	1	1	1	1	1	1	1	1	1	1
15:29:27.158	1	1	1	1	1	1	1	1	1	1	1	1	1	1	1	1	1	1	1
15:29:28.123	1	1	1	1	1	1	1	1	1	1	1	1	1	1	1	1	1	1	1
15:29:29.113	1	1	1	1	1	1	1	1	1	1	1	1	1	1	1	1	1	1	1
15:29:30.080	1	1	1	1	1	1	1	1	1	1	1	1	1	1	1	1	1	1	1
15:29:31.055	1	1	1	1	1	1	1	1	1	1	1	1	1	1	1	1	1	1	1
15:29:32.032	1	1	1	1	1	1	1	1	1	1	1	1	1	1	1	1	1	1	1
15:29:33.018	1	1	1	1	1	1	1	1	1	1	1	1	1	1	1	1	1	1	1
15:29:33.983	1	1	1	1	1	1	1	1	1	1	1	1	1	1	1	1	1	1	1
15:29:34.970	1	1	1	1	1	1	1	1	1	1	1	1	1	1	1	1	1	1	1
15:29:35.944	1	1	1	1	1	1	1	1	1	1	1	1	1	1	1	1	1	1	1
15:29:36.919	1	1	1	1	1	1	1	1	1	1	1	1	1	1	1	1	1	1	1
15:29:37.896	1	1	1	1	1	1	1	1	1	1	1	1	1	1	1	1	1	1	1
15:29:38.881	1	1	1	1	1	1	1	1	1	1	1	1	1	1	1	1	1	1	1
15:29:39.852	1	1	1	1	1	1	1	1	1	1	1	1	1	1	1	1	1	1	1
15:29:40.827	1	1	1	1	1	1	1	1	1	1	1	1	1	1	1	1	1	1	1
15:29:41.798	1	1	1	1	1	1	1	1	1	1	1	1	1	1	1	1	1	1	1
15:29:42.783	1	1	1	1	1	1	1	1	1	1	1	1	1	1	1	1	1	1	1
15:29:43.752	1	1	1	1	1	1	1	1	1	1	1	1	1	1	1	1	1	1	1
15:29:44.731	1	1	1	1	1	1	1	1	1	1	1	1	1	1	1	1	1	1	1
15:29:45.707	1	1	1	1	1	1	1	1	1	1	1	1	1	1	1	1	1	1	1
15:29:46.686	1	1	1	1	1	1	1	1	1	1	1	1	1	1	1	1	1	1	1
15:29:47.662	1	1	1	1	1	1	1	1	1	1	1	1	1	1	1	1	1	1	1
15:29:48.637	1	1	1	1	1	1	1	1	1	1	1	1	1	1	1	1	1	1	1
15:29:49.609	1	1	1	1	1	1	1	1	1	1	1	1	1	1	1	1	1	1	1
15:29:50.596	1	1	1	1	1	1	1	1	1	1	1	1	1	1	1	1	1	1	1
15:29:51.577	1	1	1	1	1	1	1	1	1	1	1	1	1	1	1	1	1	1	1
15:29:52.545	1	1	1	1	1	1	1	1	1	1	1	1	1	1	1	1	1	1	1
15:29:53.518	1	1	1	1	1	1	1	1	1	1	1	1	1	1	1	1	1	1	1
15:29:54.493	1	1	1	1	1	1	1	1	1	1	1	1	1	1	1	1	1	1	1
15:29:55.467	1	1	1	1	1	1	1	1	1	1	1	1	1	1	1	1	1	1	1
15:29:56.453	1	1	1	1	1	1	1	1	1	1	1	1	1	1	1	1	1	1	1
15:29:57.421	1	1	1	1	1	1	1	1	1	1	1	1	1	1	1	1	1	1	1
15:29:58.409	1	1	1	1	1	1	1	1	1	1	1	1	1	1	1	1	1	1	1
15:29:59.380	1	1	1	1	1	1	1	1	1	1	1	1	1	1	1	1	1	1	1
15:30:00.358	1	1	1	1	1	1	1	1	1	1	1	1	1	1	1	1	1	1	1
15:31:16.012	1	1	1	1	1	1	1	1	1	1	1	1	1	1	1	1	1	1	1
15:31:16.998	1	1	1	1	1	1	1	1	1	1	1	1	1	1	1	1	1	1	1
15:31:17.970	1	1	1	1	1	1	1	1	1	1	1	1	1	1	1	1	1	1	1
15:31:18.940	1	1	1	1	1	1	1	1	1	1	1	1	1	1	1	1	1	1	1
15:31:19.922	1	1	1	1	1	1	1	1	1	1	1	1	1	1	1	1	1	1	1
15:31:20.907	1	1	1	1	1	1	1	1	1	1	1	1	1	1	1	1	1	1	1
15:31:21.879	1	1	1	1	1	1	1	1	1	1	1	1	1	1	1	1	1	1	1
15:31:22.849	1	1	1	1	1	1	1	1	1	1	1	1	1	1	1	1	1	1	1
15:31:23.829	1	1	1	1	1	1	1	1	1	1	1	1	1	1	1	1	1	1	1
15:31:24.815	1	1	1	1	1	1	1	1	1	1	1	1	1	1	1	1	1	1	1
15:31:25.785	1	1	1	1	1	1	1	1	1	1	1	1	1	1	1	1	1	1	1
15:31:26.756	1	1	1	1	1	1	1	1	1	1	1	1	1	1	1	1	1	1	1
15:31:27.736	1	1	1	1	1	1	1	1	1	1	1	1	1	1	1	1	1	1	1
15:31:28.707	1	1	1	1	1	1	1	1	1	1	1	1	1	1	1	1	1	1	1
15:31:29.693	1	1	1	1	1	1	1	1	1	1	1	1	1	1	1	1	1	1	1
15:31:30.664	1	1	1	1	1	1	1	1	1	1	1	1	1	1	1	1	1	1	1
15:31:31.643	1	1	1	1	1	1	1	1	1	1	1	1	1	1	1	1	1	1	1
15:31:32.613	1	1	1	1	1	1	1	1	1	1	1	1	1	1	1	1	1	1	1
15:31:33.598	1	1	1	1	1	1	1	1	1	1	1	1	1	1	1	1	1	1	1
15:31:34.568	1	1	1	1	1	1	1	1	1	1	1	1	1	1	1	1	1	1	1
15:31:35.549	1	1	1	1	1	1	1	1	1	1	1	1	1	1	1	1	1	1	1
15:31:36.519	1	1	1	1	1	1	1	1	1	1	1	1	1	1	1	1	1	1	1
15:31:37.505	1	1	1	1	1	1	1	1	1	1	1	1	1	1	1	1	1	1	1
15:31:38.475	1	1	1	1	1	1	1	1	1	1	1	1	1	1	1	1	1	1	1
15:31:39.457	1	1	1	1	1	1	1	1	1	1	1	1	1	1	1	1	1	1	1
15:31:40.427	1	1	1	1	1	1	1	1	1	1	1	1	1	1	1	1	1	1	1
15:31:41.413	1	1	1	1	1	1	1	1	1	1	1	1	1	1	1	1	1	1	1
15:31:42.383	1	1	1	1	1	1	1	1	1	1	1	1	1	1	1	1	1	1	1
15:31:43.362	1	1	1	1	1	1	1	1	1	1	1	1	1	1	1	1	1	1	1
15:31:44.333	1	1	1	1	1	1	1	1	1	1	1	1	1	1	1	1	1	1	1
15:31:45.319	1	1	1	1	1	1	1	1	1	1	1	1	1	1	1	1	1	1	1
15:31:46.289	1	1	1	1	1	1	1	1	1	1	1	1	1	1	1	1	1	1	1
15:31:47.270	1	1	1	1	1	1	1	1	1	1	1	1	1	1	1	1	1	1	1
15:31:48.240	1	1	1	1	1	1	1	1	1	1	1	1	1	1	1	1	1	1	1
15:31:49.228	1	1	1	1	1	1	1	1	1	1	1	1	1	1	1	1	1	1	1
15:31:50.198	1	1	1	1	1	1	1	1	1	1	1	1	1	1	1	1	1	1	1
15:31:51.178	1	1	1	1	1	1	1	1	1	1	1	1	1	1	1	1	1	1	1
15:31:52.148	1	1	1	1	1	1	1	1	1	1	1	1	1	1	1	1	1	1	1
15:31:53.118	1	1	1	1	1	1	1	1	1	1	1	1	1	1	1	1	1	1	1
15:31:54.104	1	1	1	1	1	1	1	1	1	1	1	1	1	1	1	1	1	1	1
15:31:55.083	1	1	1	1	1	1	1	1	1	1	1	1	1	1	1	1	1	1	1
15:31:56.053	1	1	1	1	1	1	1	1	1	1	1	1	1	1	1	1	1	1	1
15:31:57.024	1	1	1	1	1	1	1	1	1	1	1	1	1	1	1	1	1	1	1
15:31:58.011	1	1	1	1	1	1	1	1	1	1	1	1	1	1	1	1	1	1	1
15:31:58.991	1	1	1	1	1	1	1	1	1	1	1	1	1	1	1	1	1	1	1
15:31:59.962	1	1	1	1	1	1	1	1	1	1	1	1	1	1	1	1	1	1	1
15:32:00.933	1	1	1	1	1	1	1	1	1	1	1	1	1	1	1	1	1	1	1
15:33:15.842	1	1	1	1	1	1	1	1	1	1	1	1	1	1	1	1	1	1	1
15:33:16.829	1	1	1	1	1	1	1	1	1	1	1	1	1	1	1	1	1	1	1
15:33:17.802	1	1	1	1	1	1	1	1	1	1	1	1	1	1	1	1	1	1	1
15:33:18.771	1	1	1	1	1	1	1	1	1	1	1	1	1	1	1	1	1	1	1
15:33:19.752	1	1	1	1	1	1	1	1	1	1	1	1	1	1	1	1	1	1	1
15:33:20.722	1	1	1	1	1	1	1	1	1	1	1	1	1	1	1	1	1	1	1
15:33:21.709	1	1	1	1	1	1	1	1	1	1	1	1	1	1	1	1	1	1	1
15:33:22.679	1	1	1	1	1	1	1	1	1	1	1	1	1	1	1	1	1	1	1
15:33:23.659	1	1	1	1	1	1	1	1	1	1	1	1	1	1	1	1	1	1	1
15:33:24.630	1	1	1	1	1	1	1	1	1	1	1	1	1	1	1	1	1	1	1
15:33:25.615	1	1	1	1	1	1	1	1	1	1	1	1	1	1	1	1	1	1	1
15:33:26.585	1	1	1	1	1	1	1	1	1	1	1	1	1	1	1	1	1	1	1
15:33:27.565	1	1	1	1	1	1	1	1	1	1	1	1	1	1	1	1	1	1	1
15:33:28.537	1	1	1	1	1	1	1	1	1	1	1	1	1	1	1	1	1	1	1
15:33:29.522	1	1	1	1	1	1	1	1	1	1	1	1	1	1	1	1	1	1	1
15:33:30.493	1	1	1	1	1	1	1	1	1	1	1	1	1	1	1	1	1	1	1
15:33:31.473	1	1	1	1	1	1	1	1	1	1	1	1	1	1	1	1	1	1	1
15:33:32.444	1	1	1	1	1	1	1	1	1	1	1	1	1	1	1	1	1	1	1
15:33:33.432	1	1	1	1	1	1	1	1	1	1	1	1	1	1	1	1	1	1	1
15:33:34.402	1	1	1	1	1	1	1	1	1	1	1	1	1	1	1	1	1	1	1
15:33:35.382	1	1	1	1	1	1	1	1	1	1	1	1	1	1	1	1	1	1	1
15:33:36.352	1	1	1	1	1	1	1	1	1	1	1	1	1	1	1	1	1	1	1
15:33:37.339	1	1	1	1	1	1	1	1	1	1	1	1	1	1	1	1	1	1	1
15:33:38.309	1	1	1	1	1	1	1	1	1	1	1	1	1	1	1	1	1	1	1
15:33:39.276	1	1	1	1	1	1	1	1	1	1	1	1	1	1	1	1	1	1	1
15:33:40.262	1	1	1	1	1	1	1	1	1	1	1	1	1	1	1	1	1	1	1
15:33:41.233	1	1	1	1	1	1	1	1	1	1	1	1	1	1	1	1	1	1	1
15:33:42.219	1	1	1	1	1	1	1	1	1	1	1	1	1	1	1	1	1	1	1
15:33:43.184	1	1	1	1	1	1	1	1	1	1	1	1	1	1	1	1	1	1	1
15:33:44.154	1	1	1	1	1	1	1	1	1	1	1	1	1	1	1	1	1	1	1
15:33:45.139	1	1	1	1	1	1	1	1	1	1	1	1	1	1	1	1	1	1	1
15:33:46.121	1	1	1	1	1	1	1	1	1	1	1	1	1	1	1	1	1	1	1
15:33:47.089	1	1	1	1	1	1	1	1	1	1	1	1	1	1	1	1	1	1	1
15:33:48.074	1	1	1	1	1	1	1	1	1	1	1	1	1	1	1	1	1	1	1
15:33:49.045	1	1	1	1	1	1	1	1	1	1	1	1	1	1	1	1	1	1	1
15:33:50.028	1	1	1	1	1	1	1	1	1	1	1	1	1	1	1	1	1	1	1
15:33:50.996	1	1	1	1	1	1	1	1	1	1	1	1	1	1	1	1	1	1	1
15:33:51.983	1	1	1	1	1	1	1	1	1	1	1	1	1	1	1	1	1	1	1
15:33:52.953	1	1	1	1	1	1	1	1	1	1	1	1	1	1	1	1	1	1	1
15:33:53.935	1	1	1	1	1	1	1	1	1	1	1	1	1	1	1	1	1	1	1
15:33:54.904	1	1	1	1	1	1	1	1	1	1	1	1	1	1	1	1	1	1	1
15:33:55.889	1	1	1	1	1	1	1	1	1	1	1	1	1	1	1	1	1	1	1
15:33:56.859	1	1	1	1	1	1	1	1	1	1	1	1	1	1	1	1	1	1	1
15:33:57.840	1	1	1	1	1	1	1	1	1	1	1	1	1	1	1	1	1	1	1
15:33:58.809	1	1	1	1	1	1	1	1	1	1	1	1	1	1	1	1	1	1	1
15:33:59.781	1	1	1	1	1	1	1	1	1	1	1	1	1	1	1	1	1	1	1
15:35:15.728	1	1	1	1	1	1	1	1	1	1	1	1	1	1	1	1	1	1	1
15:35:16.708	1	1	1	1	1	1	1	1	1	1	1	1	1	1	1	1	1	1	1
15:35:17.695	1	1	1	1	1	1	1	1	1	1	1	1	1	1	1	1	1	1	1
15:35:18.666	1	1	1	1	1	1	1	1	1	1	1	1	1	1	1	1	1	1	1
15:35:19.637	1	1	1	1	1	1	1	1	1	1	1	1	1	1	1	1	1	1	1
15:35:20.616	1	1	1	1	1	1	1	1	1	1	1	1	1	1	1	1	1	1	1
15:35:21.601	1	1	1	1	1	1	1	1	1	1	1	1	1	1	1	1	1	1	1
15:35:22.573	1	1	1	1	1	1	1	1	1	1	1	1	1	1	1	1	1	1	1
15:35:23.543	1	1	1	1	1	1	1	1	1	1	1	1	1	1	1	1	1	1	1
15:35:24.523	1	1	1	1	1	1	1	1	1	1	1	1	1	1	1	1	1	1	1
15:35:25.509	1	1	1	1	1	1	1	1	1	1	1	1	1	1	1	1	1	1	1
15:35:26.480	1	1	1	1	1	1	1	1	1	1	1	1	1	1	1	1	1	1	1
15:35:27.451	1	1	1	1	1	1	1	1	1	1	1	1	1	1	1	1	1	1	1
15:35:28.434	1	1	1	1	1	1	1	1	1	1	1	1	1	1	1	1	1	1	1
15:35:29.403	1	1	1	1	1	1	1	1	1	1	1	1	1	1	1	1	1	1	1
15:35:30.390	1	1	1	1	1	1	1	1	1	1	1	1	1	1	1	1	1	1	1
15:35:31.360	1	1	1	1	1	1	1	1	1	1	1	1	1	1	1	1	1	1	1
15:35:32.339	1	1	1	1	1	1	1	1	1	1	1	1	1	1	1	1	1	1	1
15:35:33.311	1	1	1	1	1	1	1	1	1	1	1	1	1	1	1	1	1	1	1
15:35:34.297	1	1	1	1	1	1	1	1	1	1	1	1	1	1	1	1	1	1	1
15:35:35.267	1	1	1	1	1	1	1	1	1	1	1	1	1	1	1	1	1	1	1
15:35:36.246	1	1	1	1	1	1	1	1	1	1	1	1	1	1	1	1	1	1	1
15:35:37.218	1	1	1	1	1	1	1	1	1	1	1	1	1	1	1	1	1	1	1
15:35:38.205	1	1	1	1	1	1	1	1	1	1	1	1	1	1	1	1	1	1	1
15:35:39.174	1	1	1	1	1	1	1	1	1	1	1	1	1	1	1	1	1	1	1
15:35:40.155	1	1	1	1	1	1	1	1	1	1	1	1	1	1	1	1	1	1	1
15:35:41.126	1	1	1	1	1	1	1	1	1	1	1	1	1	1	1	1	1	1	1
15:35:42.113	1	1	1	1	1	1	1	1	1	1	1	1	1	1	1	1	1	1	1
15:35:43.083	1	1	1	1	1	1	1	1	1	1	1	1	1	1	1	1	1	1	1
15:35:44.063	1	1	1	1	1	1	1	1	1	1	1	1	1	1	1	1	1	1	1
15:35:45.034	1	1	1	1	1	1	1	1	1	1	1	1	1	1	1	1	1	1	1
15:35:46.003	1	1	1	1	1	1	1	1	1	1	1	1	1	1	1	1	1	1	1
15:35:46.989	1	1	1	1	1	1	1	1	1	1	1	1	1	1	1	1	1	1	1
15:35:47.968	1	1	1	1	1	1	1	1	1	1	1	1	1	1	1	1	1	1	1
15:35:48.938	1	1	1	1	1	1	1	1	1	1	1	1	1	1	1	1	1	1	1
15:35:49.924	1	1	1	1	1	1	1	1	1	1	1	1	1	1	1	1	1	1	1
15:35:50.895	1	1	1	1	1	1	1	1	1	1	1	1	1	1	1	1	1	1	1
15:35:51.876	1	1	1	1	1	1	1	1	1	1	1	1	1	1	1	1	1	1	1
15:35:52.847	1	1	1	1	1	1	1	1	1	1	1	1	1	1	1	1	1	1	1
15:35:53.833	1	1	1	1	1	1	1	1	1	1	1	1	1	1	1	1	1	1	1
15:35:54.802	1	1	1	1	1	1	1	1	1	1	1	1	1	1	1	1	1	1	1
15:35:55.784	1	1	1	1	1	1	1	1	1	1	1	1	1	1	1	1	1	1	1
15:35:56.754	1	1	1	1	1	1	1	1	1	1	1	1	1	1	1	1	1	1	1
15:35:57.727	1	1	1	1	1	1	1	1	1	1	1	1	1	1	1	1	1	1	1
15:35:58.712	1	1	1	1	1	1	1	1	1	1	1	1	1	1	1	1	1	1	1
15:35:59.677	1	1	1	1	1	1	1	1	1	1	1	1	1	1	1	1	1	1	1
15:37:15.124	1	1	1	1	1	1	1	1	1	1	1	1	1	1	1	1	1	1	1
15:37:16.110	1	1	1	1	1	1	1	1	1	1	1	1	1	1	1	1	1	1	1
15:37:17.089	1	1	1	1	1	1	1	1	1	1	1	1	1	1	1	1	1	1	1
15:37:18.059	1	1	1	1	1	1	1	1	1	1	1	1	1	1	1	1	1	1	1
15:37:19.046	1	1	1	1	1	1	1	1	1	1	1	1	1	1	1	1	1	1	1
15:37:20.016	1	1	1	1	1	1	1	1	1	1	1	1	1	1	1	1	1	1	1
15:37:20.998	1	1	1	1	1	1	1	1	1	1	1	1	1	1	1	1	1	1	1
15:37:21.967	1	1	1	1	1	1	1	1	1	1	1	1	1	1	1	1	1	1	1
15:37:22.939	1	1	1	1	1	1	1	1	1	1	1	1	1	1	1	1	1	1	1
15:37:23.909	1	1	1	1	1	1	1	1	1	1	1	1	1	1	1	1	1	1	1
15:37:24.905	1	1	1	1	1	1	1	1	1	1	1	1	1	1	1	1	1	1	1
15:37:25.873	1	1	1	1	1	1	1	1	1	1	1	1	1	1	1	1	1	1	1
15:37:26.845	1	1	1	1	1	1	1	1	1	1	1	1	1	1	1	1	1	1	1
15:37:27.816	1	1	1	1	1	1	1	1	1	1	1	1	1	1	1	1	1	1	1
15:37:28.812	1	1	1	1	1	1	1	1	1	1	1	1	1	1	1	1	1	1	1
15:37:29.783	1	1	1	1	1	1	1	1	1	1	1	1	1	1	1	1	1	1	1
15:37:30.753	1	1	1	1	1	1	1	1	1	1	1	1	1	1	1	1	1	1	1
15:37:31.723	1	1	1	1	1	1	1	1	1	1	1	1	1	1	1	1	1	1	1
15:37:32.719	1	1	1	1	1	1	1	1	1	1	1	1	1	1	1	1	1	1	1
15:37:33.689	1	1	1	1	1	1	1	1	1	1	1	1	1	1	1	1	1	1	1
15:37:34.659	1	1	1	1	1	1	1	1	1	1	1	1	1	1	1	1	1	1	1
15:37:35.629	1	1	1	1	1	1	1	1	1	1	1	1	1	1	1	1	1	1	1
15:37:36.609	1	1	1	1	1	1	1	1	1	1	1	1	1	1	1	1	1	1	1
15:37:37.581	1	1	1	1	1	1	1	1	1	1	1	1	1	1	1	1	1	1	1
15:37:38.566	1	1	1	1	1	1	1	1	1	1	1	1	1	1	1	1	1	1	1
15:37:39.537	1	1	1	1	1	1	1	1	1	1	1	1	1	1	1	1	1	1	1
15:37:40.517	1	1	1	1	1	1	1	1	1	1	1	1	1	1	1	1	1	1	1
15:37:41.492	1	1	1	1	1	1	1	1	1	1	1	1	1	1	1	1	1	1	1
15:37:42.478	1	1	1	1	1	1	1	1	1	1	1	1	1	1	1	1	1	1	1
15:37:43.449	1	1	1	1	1	1	1	1	1	1	1	1	1	1	1	1	1	1	1
15:37:44.431	1	1	1	1	1	1	1	1	1	1	1	1	1	1	1	1	1	1	1
15:37:45.400	1	1	1	1	1	1	1	1	1	1	1	1	1	1	1	1	1	1	1
15:37:46.385	1	1	1	1	1	1	1	1	1	1	1	1	1	1	1	1	1	1	1
15:37:47.357	1	1	1	1	1	1	1	1	1	1	1	1	1	1	1	1	1	1	1
15:37:48.338	1	1	1	1	1	1	1	1	1	1	1	1	1	1	1	1	1	1	1
15:37:49.306	1	1	1	1	1	1	1	1	1	1	1	1	1	1	1	1	1	1	1
15:37:50.291	1	1	1	1	1	1	1	1	1	1	1	1	1	1	1	1	1	1	1
15:37:51.261	1	1	1	1	1	1	1	1	1	1	1	1	1	1	1	1	1	1	1
15:37:52.243	1	1	1	1	1	1	1	1	1	1	1	1	1	1	1	1	1	1	1
15:37:53.212	1	1	1	1	1	1	1	1	1	1	1	1	1	1	1	1	1	1	1
15:37:54.198	1	1	1	1	1	1	1	1	1	1	1	1	1	1	1	1	1	1	1
15:37:55.170	1	1	1	1	1	1	1	1	1	1	1	1	1	1	1	1	1	1	1
15:37:56.137	1	1	1	1	1	1	1	1	1	1	1	1	1	1	1	1	1	1	1
15:37:57.121	1	1	1	1	1	1	1	1	1	1	1	1	1	1	1	1	1	1	1
15:37:58.107	1	1	1	1	1	1	1	1	1	1	1	1	1	1	1	1	1	1	1
15:37:59.078	1	1	1	1	1	1	1	1	1	1	1	1	1	1	1	1	1	1	1
15:38:00.061	1	1	1	1	1	1	1	1	1	1	1	1	1	1	1	1	1	1	1
15:39:15.540	1	1	1	1	1	1	1	1	1	1	1	1	1	1	1	1	1	1	1
15:39:16.520	1	1	1	1	1	1	1	1	1	1	1	1	1	1	1	1	1	1	1
15:39:17.491	1	1	1	1	1	1	1	1	1	1	1	1	1	1	1	1	1	1	1
15:39:18.477	1	1	1	1	1	1	1	1	1	1	1	1	1	1	1	1	1	1	1
15:39:19.447	1	1	1	1	1	1	1	1	1	1	1	1	1	1	1	1	1	1	1
15:39:20.429	1	1	1	1	1	1	1	1	1	1	1	1	1	1	1	1	1	1	1
15:39:21.399	1	1	1	1	1	1	1	1	1	1	1	1	1	1	1	1	1	1	1
15:39:22.369	1	1	1	1	1	1	1	1	1	1	1	1	1	1	1	1	1	1	1
15:39:23.354	1	1	1	1	1	1	1	1	1	1	1	1	1	1	1	1	1	1	1
15:39:24.337	1	1	1	1	1	1	1	1	1	1	1	1	1	1	1	1	1	1	1
15:39:25.307	1	1	1	1	1	1	1	1	1	1	1	1	1	1	1	1	1	1	1
15:39:26.278	1	1	1	1	1	1	1	1	1	1	1	1	1	1	1	1	1	1	1
15:39:27.260	1	1	1	1	1	1	1	1	1	1	1	1	1	1	1	1	1	1	1
15:39:28.242	1	1	1	1	1	1	1	1	1	1	1	1	1	1	1	1	1	1	1
15:39:29.213	1	1	1	1	1	1	1	1	1	1	1	1	1	1	1	1	1	1	1
15:39:30.185	1	1	1	1	1	1	1	1	1	1	1	1	1	1	1	1	1	1	1
15:39:31.166	1	1	1	1	1	1	1	1	1	1	1	1	1	1	1	1	1	1	1
15:39:32.134	1	1	1	1	1	1	1	1	1	1	1	1	1	1	1	1	1	1	1
15:39:33.121	1	1	1	1	1	1	1	1	1	1	1	1	1	1	1	1	1	1	1
15:39:34.092	1	1	1	1	1	1	1	1	1	1	1	1	1	1	1	1	1	1	1
15:39:35.072	1	1	1	1	1	1	1	1	1	1	1	1	1	1	1	1	1	1	1
15:39:36.042	1	1	1	1	1	1	1	1	1	1	1	1	1	1	1	1	1	1	1
15:39:37.012	1	1	1	1	1	1	1	1	1	1	1	1	1	1	1	1	1	1	1
15:39:38.000	1	1	1	1	1	1	1	1	1	1	1	1	1	1	1	1	1	1	1
15:39:38.964	1	1	1	1	1	1	1	1	1	1	1	1	1	1	1	1	1	1	1
15:39:39.952	1	1	1	1	1	1	1	1	1	1	1	1	1	1	1	1	1	1	1
15:39:40.922	1	1	1	1	1	1	1	1	1	1	1	1	1	1	1	1	1	1	1
15:39:41.908	1	1	1	1	1	1	1	1	1	1	1	1	1	1	1	1	1	1	1
15:39:42.875	1	1	1	1	1	1	1	1	1	1	1	1	1	1	1	1	1	1	1
15:39:43.862	1	1	1	1	1	1	1	1	1	1	1	1	1	1	1	1	1	1	1
15:39:44.832	1	1	1	1	1	1	1	1	1	1	1	1	1	1	1	1	1	1	1
15:39:45.817	1	1	1	1	1	1	1	1	1	1	1	1	1	1	1	1	1	1	1
15:39:46.797	1	1	1	1	1	1	1	1	1	1	1	1	1	1	1	1	1	1	1
15:39:47.768	1	1	1	1	1	1	1	1	1	1	1	1	1	1	1	1	1	1	1
15:39:48.738	1	1	1	1	1	1	1	1	1	1	1	1	1	1	1	1	1	1	1
15:39:49.707	1	1	1	1	1	1	1	1	1	1	1	1	1	1	1	1	1	1	1
15:39:50.703	1	1	1	1	1	1	1	1	1	1	1	1	1	1	1	1	1	1	1
15:39:51.673	1	1	1	1	1	1	1	1	1	1	1	1	1	1	1	1	1	1	1
15:39:52.643	1	1	1	1	1	1	1	1	1	1	1	1	1	1	1	1	1	1	1
15:39:53.613	1	1	1	1	1	1	1	1	1	1	1	1	1	1	1	1	1	1	1
15:39:54.609	1	1	1	1	1	1	1	1	1	1	1	1	1	1	1	1	1	1	1
15:39:55.579	1	1	1	1	1	1	1	1	1	1	1	1	1	1	1	1	1	1	1
15:39:56.550	1	1	1	1	1	1	1	1	1	1	1	1	1	1	1	1	1	1	1
15:39:57.520	1	1	1	1	1	1	1	1	1	1	1	1	1	1	1	1	1	1	1
15:39:58.517	1	1	1	1	1	1	1	1	1	1	1	1	1	1	1	1	1	1	1
15:39:59.487	1	1	1	1	1	1	1	1	1	1	1	1	1	1	1	1	1	1	1
15:40:00.458	1	1	1	1	1	1	1	1	1	1	1	1	1	1	1	1	1	1	1
15:41:15.840	1	1	1	1	1	1	1	1	1	1	1	1	1	1	1	1	1	1	1
15:41:16.810	1	1	1	1	1	1	1	1	1	1	1	1	1	1	1	1	1	1	1
15:41:17.791	1	1	1	1	1	1	1	1	1	1	1	1	1	1	1	1	1	1	1
15:41:18.773	1	1	1	1	1	1	1	1	1	1	1	1	1	1	1	1	1	1	1
15:41:19.741	1	1	1	1	1	1	1	1	1	1	1	1	1	1	1	1	1	1	1
15:41:20.727	1	1	1	1	1	1	1	1	1	1	1	1	1	1	1	1	1	1	1
15:41:21.692	1	1	1	1	1	1	1	1	1	1	1	1	1	1	1	1	1	1	1
15:41:22.677	1	1	1	1	1	1	1	1	1	1	1	1	1	1	1	1	1	1	1
15:41:23.649	1	1	1	1	1	1	1	1	1	1	1	1	1	1	1	1	1	1	1
15:41:24.634	1	1	1	1	1	1	1	1	1	1	1	1	1	1	1	1	1	1	1
15:41:25.600	1	1	1	1	1	1	1	1	1	1	1	1	1	1	1	1	1	1	1
15:41:26.572	1	1	1	1	1	1	1	1	1	1	1	1	1	1	1	1	1	1	1
15:41:27.559	1	1	1	1	1	1	1	1	1	1	1	1	1	1	1	1	1	1	1
15:41:28.540	1	1	1	1	1	1	1	1	1	1	1	1	1	1	1	1	1	1	1
15:41:29.510	1	1	1	1	1	1	1	1	1	1	1	1	1	1	1	1	1	1	1
15:41:30.480	1	1	1	1	1	1	1	1	1	1	1	1	1	1	1	1	1	1	1
15:41:31.465	1	1	1	1	1	1	1	1	1	1	1	1	1	1	1	1	1	1	1
15:41:32.447	1	1	1	1	1	1	1	1	1	1	1	1	1	1	1	1	1	1	1
15:41:33.417	1	1	1	1	1	1	1	1	1	1	1	1	1	1	1	1	1	1	1
15:41:34.386	1	1	1	1	1	1	1	1	1	1	1	1	1	1	1	1	1	1	1
15:41:35.373	1	1	1	1	1	1	1	1	1	1	1	1	1	1	1	1	1	1	1
15:41:36.338	1	1	1	1	1	1	1	1	1	1	1	1	1	1	1	1	1	1	1
15:41:37.324	1	1	1	1	1	1	1	1	1	1	1	1	1	1	1	1	1	1	1
15:41:38.294	1	1	1	1	1	1	1	1	1	1	1	1	1	1	1	1	1	1	1
15:41:39.280	1	1	1	1	1	1	1	1	1	1	1	1	1	1	1	1	1	1	1
15:41:40.244	1	1	1	1	1	1	1	1	1	1	1	1	1	1	1	1	1	1	1
15:41:41.230	1	1	1	1	1	1	1	1	1	1	1	1	1	1	1	1	1	1	1
15:41:42.216	1	1	1	1	1	1	1	1	1	1	1	1	1	1	1	1	1	1	1
15:41:43.185	1	1	1	1	1	1	1	1	1	1	1	1	1	1	1	1	1	1	1
15:41:44.168	1	1	1	1	1	1	1	1	1	1	1	1	1	1	1	1	1	1	1
15:41:45.137	1	1	1	1	1	1	1	1	1	1	1	1	1	1	1	1	1	1	1
15:41:46.123	1	1	1	1	1	1	1	1	1	1	1	1	1	1	1	1	1	1	1
15:41:47.093	1	1	1	1	1	1	1	1	1	1	1	1	1	1	1	1	1	1	1
15:41:48.075	1	1	1	1	1	1	1	1	1	1	1	1	1	1	1	1	1	1	1
15:41:49.044	1	1	1	1	1	1	1	1	1	1	1	1	1	1	1	1	1	1	1
15:41:50.015	1	1	1	1	1	1	1	1	1	1	1	1	1	1	1	1	1	1	1
15:41:50.985	1	1	1	1	1	1	1	1	1	1	1	1	1	1	1	1	1	1	1
15:41:51.980	1	1	1	1	1	1	1	1	1	1	1	1	1	1	1	1	1	1	1
15:41:52.950	1	1	1	1	1	1	1	1	1	1	1	1	1	1	1	1	1	1	1
15:41:53.922	1	1	1	1	1	1	1	1	1	1	1	1	1	1	1	1	1	1	1
15:41:54.893	1	1	1	1	1	1	1	1	1	1	1	1	1	1	1	1	1	1	1
15:41:55.875	1	1	1	1	1	1	1	1	1	1	1	1	1	1	1	1	1	1	1
15:41:56.861	1	1	1	1	1	1	1	1	1	1	1	1	1	1	1	1	1	1	1
15:41:57.830	1	1	1	1	1	1	1	1	1	1	1	1	1	1	1	1	1	1	1
15:41:58.800	1	1	1	1	1	1	1	1	1	1	1	1	1	1	1	1	1	1	1
15:41:59.780	1	1	1	1	1	1	1	1	1	1	1	1	1	1	1	1	1	1	1
15:43:15.502	1	1	1	1	1	1	1	1	1	1	1	1	1	1	1	1	1	1	1
15:43:16.487	1	1	1	1	1	1	1	1	1	1	1	1	1	1	1	1	1	1	1
15:43:17.458	1	1	1	1	1	1	1	1	1	1	1	1	1	1	1	1	1	1	1
15:43:18.438	1	1	1	1	1	1	1	1	1	1	1	1	1	1	1	1	1	1	1
15:43:19.424	1	1	1	1	1	1	1	1	1	1	1	1	1	1	1	1	1	1	1
15:43:20.393	1	1	1	1	1	1	1	1	1	1	1	1	1	1	1	1	1	1	1
15:43:21.366	1	1	1	1	1	1	1	1	1	1	1	1	1	1	1	1	1	1	1
15:43:22.346	1	1	1	1	1	1	1	1	1	1	1	1	1	1	1	1	1	1	1
15:43:23.316	1	1	1	1	1	1	1	1	1	1	1	1	1	1	1	1	1	1	1
15:43:24.302	1	1	1	1	1	1	1	1	1	1	1	1	1	1	1	1	1	1	1
15:43:25.273	1	1	1	1	1	1	1	1	1	1	1	1	1	1	1	1	1	1	1
15:43:26.254	1	1	1	1	1	1	1	1	1	1	1	1	1	1	1	1	1	1	1
15:43:27.224	1	1	1	1	1	1	1	1	1	1	1	1	1	1	1	1	1	1	1
15:43:28.211	1	1	1	1	1	1	1	1	1	1	1	1	1	1	1	1	1	1	1
15:43:29.182	1	1	1	1	1	1	1	1	1	1	1	1	1	1	1	1	1	1	1
15:43:30.147	1	1	1	1	1	1	1	1	1	1	1	1	1	1	1	1	1	1	1
15:43:31.132	1	1	1	1	1	1	1	1	1	1	1	1	1	1	1	1	1	1	1
15:43:32.104	1	1	1	1	1	1	1	1	1	1	1	1	1	1	1	1	1	1	1
15:43:33.090	1	1	1	1	1	1	1	1	1	1	1	1	1	1	1	1	1	1	1
15:43:34.057	1	1	1	1	1	1	1	1	1	1	1	1	1	1	1	1	1	1	1
15:43:35.044	1	1	1	1	1	1	1	1	1	1	1	1	1	1	1	1	1	1	1
15:43:36.015	1	1	1	1	1	1	1	1	1	1	1	1	1	1	1	1	1	1	1
15:43:37.000	1	1	1	1	1	1	1	1	1	1	1	1	1	1	1	1	1	1	1
15:43:37.966	1	1	1	1	1	1	1	1	1	1	1	1	1	1	1	1	1	1	1
15:43:38.953	1	1	1	1	1	1	1	1	1	1	1	1	1	1	1	1	1	1	1
15:43:39.923	1	1	1	1	1	1	1	1	1	1	1	1	1	1	1	1	1	1	1
15:43:40.906	1	1	1	1	1	1	1	1	1	1	1	1	1	1	1	1	1	1	1
15:43:41.874	1	1	1	1	1	1	1	1	1	1	1	1	1	1	1	1	1	1	1
15:43:42.860	1	1	1	1	1	1	1	1	1	1	1	1	1	1	1	1	1	1	1
15:43:43.831	1	1	1	1	1	1	1	1	1	1	1	1	1	1	1	1	1	1	1
15:43:44.812	1	1	1	1	1	1	1	1	1	1	1	1	1	1	1	1	1	1	1
15:43:45.782	1	1	1	1	1	1	1	1	1	1	1	1	1	1	1	1	1	1	1
15:43:46.753	1	1	1	1	1	1	1	1	1	1	1	1	1	1	1	1	1	1	1
15:43:47.739	1	1	1	1	1	1	1	1	1	1	1	1	1	1	1	1	1	1	1
15:43:48.718	1	1	1	1	1	1	1	1	1	1	1	1	1	1	1	1	1	1	1
15:43:49.688	1	1	1	1	1	1	1	1	1	1	1	1	1	1	1	1	1	1	1
15:43:50.674	1	1	1	1	1	1	1	1	1	1	1	1	1	1	1	1	1	1	1
15:43:51.644	1	1	1	1	1	1	1	1	1	1	1	1	1	1	1	1	1	1	1
15:43:52.622	1	1	1	1	1	1	1	1	1	1	1	1	1	1	1	1	1	1	1
15:43:53.591	1	1	1	1	1	1	1	1	1	1	1	1	1	1	1	1	1	1	1
15:43:54.562	1	1	1	1	1	1	1	1	1	1	1	1	1	1	1	1	1	1	1
15:43:55.550	1	1	1	1	1	1	1	1	1	1	1	1	1	1	1	1	1	1	1
15:43:56.514	1	1	1	1	1	1	1	1	1	1	1	1	1	1	1	1	1	1	1
15:43:57.501	1	1	1	1	1	1	1	1	1	1	1	1	1	1	1	1	1	1	1
15:43:58.471	1	1	1	1	1	1	1	1	1	1	1	1	1	1	1	1	1	1	1
15:43:59.459	1	1	1	1	1	1	1	1	1	1	1	1	1	1	1	1	1	1	1
15:45:15.057	1	1	1	1	1	1	1	1	1	1	1	1	1	1	1	1	1	1	1
15:45:16.036	1	1	1	1	1	1	1	1	1	1	1	1	1	1	1	1	1	1	1
15:45:17.007	1	1	1	1	1	1	1	1	1	1	1	1	1	1	1	1	1	1	1
15:45:17.994	1	1	1	1	1	1	1	1	1	1	1	1	1	1	1	1	1	1	1
15:45:18.962	1	1	1	1	1	1	1	1	1	1	1	1	1	1	1	1	1	1	1
15:45:19.942	1	1	1	1	1	1	1	1	1	1	1	1	1	1	1	1	1	1	1
15:45:20.913	1	1	1	1	1	1	1	1	1	1	1	1	1	1	1	1	1	1	1
15:45:21.884	1	1	1	1	1	1	1	1	1	1	1	1	1	1	1	1	1	1	1
15:45:22.869	1	1	1	1	1	1	1	1	1	1	1	1	1	1	1	1	1	1	1
15:45:23.848	1	1	1	1	1	1	1	1	1	1	1	1	1	1	1	1	1	1	1
15:45:24.820	1	1	1	1	1	1	1	1	1	1	1	1	1	1	1	1	1	1	1
15:45:25.789	1	1	1	1	1	1	1	1	1	1	1	1	1	1	1	1	1	1	1
15:45:26.775	1	1	1	1	1	1	1	1	1	1	1	1	1	1	1	1	1	1	1
15:45:27.756	1	1	1	1	1	1	1	1	1	1	1	1	1	1	1	1	1	1	1
15:45:28.727	1	1	1	1	1	1	1	1	1	1	1	1	1	1	1	1	1	1	1
15:45:29.698	1	1	1	1	1	1	1	1	1	1	1	1	1	1	1	1	1	1	1
15:45:30.684	1	1	1	1	1	1	1	1	1	1	1	1	1	1	1	1	1	1	1
15:45:31.650	1	1	1	1	1	1	1	1	1	1	1	1	1	1	1	1	1	1	1
15:45:32.622	1	1	1	1	1	1	1	1	1	1	1	1	1	1	1	1	1	1	1
15:45:33.608	1	1	1	1	1	1	1	1	1	1	1	1	1	1	1	1	1	1	1
15:45:34.588	1	1	1	1	1	1	1	1	1	1	1	1	1	1	1	1	1	1	1
15:45:35.558	1	1	1	1	1	1	1	1	1	1	1	1	1	1	1	1	1	1	1
15:45:36.544	1	1	1	1	1	1	1	1	1	1	1	1	1	1	1	1	1	1	1
15:45:37.514	1	1	1	1	1	1	1	1	1	1	1	1	1	1	1	1	1	1	1
15:45:38.499	1	1	1	1	1	1	1	1	1	1	1	1	1	1	1	1	1	1	1
15:45:39.465	1	1	1	1	1	1	1	1	1	1	1	1	1	1	1	1	1	1	1
15:45:40.451	1	1	1	1	1	1	1	1	1	1	1	1	1	1	1	1	1	1	1
15:45:41.422	1	1	1	1	1	1	1	1	1	1	1	1	1	1	1	1	1	1	1
15:45:42.404	1	1	1	1	1	1	1	1	1	1	1	1	1	1	1	1	1	1	1
15:45:43.373	1	1	1	1	1	1	1	1	1	1	1	1	1	1	1	1	1	1	1
15:45:44.344	1	1	1	1	1	1	1	1	1	1	1	1	1	1	1	1	1	1	1
15:45:45.330	1	1	1	1	1	1	1	1	1	1	1	1	1	1	1	1	1	1	1
15:45:46.309	1	1	1	1	1	1	1	1	1	1	1	1	1	1	1	1	1	1	1
15:45:47.279	1	1	1	1	1	1	1	1	1	1	1	1	1	1	1	1	1	1	1
15:45:48.250	1	1	1	1	1	1	1	1	1	1	1	1	1	1	1	1	1	1	1
15:45:49.236	1	1	1	1	1	1	1	1	1	1	1	1	1	1	1	1	1	1	1
15:45:50.218	1	1	1	1	1	1	1	1	1	1	1	1	1	1	1	1	1	1	1
15:45:51.183	1	1	1	1	1	1	1	1	1	1	1	1	1	1	1	1	1	1	1
15:45:52.168	1	1	1	1	1	1	1	1	1	1	1	1	1	1	1	1	1	1	1
15:45:53.138	1	1	1	1	1	1	1	1	1	1	1	1	1	1	1	1	1	1	1
15:45:54.123	1	1	1	1	1	1	1	1	1	1	1	1	1	1	1	1	1	1	1
15:45:55.088	1	1	1	1	1	1	1	1	1	1	1	1	1	1	1	1	1	1	1
15:45:56.073	1	1	1	1	1	1	1	1	1	1	1	1	1	1	1	1	1	1	1
15:45:57.043	1	1	1	1	1	1	1	1	1	1	1	1	1	1	1	1	1	1	1
15:45:58.029	1	1	1	1	1	1	1	1	1	1	1	1	1	1	1	1	1	1	1
15:45:58.994	1	1	1	1	1	1	1	1	1	1	1	1	1	1	1	1	1	1	1
15:45:59.981	1	1	1	1	1	1	1	1	1	1	1	1	1	1	1	1	1	1	1
15:47:15.746	1	1	1	1	1	1	1	1	1	1	1	1	1	1	1	1	1	1	1
15:47:16.715	1	1	1	1	1	1	1	1	1	1	1	1	1	1	1	1	1	1	1
15:47:17.684	1	1	1	1	1	1	1	1	1	1	1	1	1	1	1	1	1	1	1
15:47:18.679	1	1	1	1	1	1	1	1	1	1	1	1	1	1	1	1	1	1	1
15:47:19.648	1	1	1	1	1	1	1	1	1	1	1	1	1	1	1	1	1	1	1
15:47:20.617	1	1	1	1	1	1	1	1	1	1	1	1	1	1	1	1	1	1	1
15:47:21.604	1	1	1	1	1	1	1	1	1	1	1	1	1	1	1	1	1	1	1
15:47:22.585	1	1	1	1	1	1	1	1	1	1	1	1	1	1	1	1	1	1	1
15:47:23.555	1	1	1	1	1	1	1	1	1	1	1	1	1	1	1	1	1	1	1
15:47:24.526	1	1	1	1	1	1	1	1	1	1	1	1	1	1	1	1	1	1	1
15:47:25.512	1	1	1	1	1	1	1	1	1	1	1	1	1	1	1	1	1	1	1
15:47:26.476	1	1	1	1	1	1	1	1	1	1	1	1	1	1	1	1	1	1	1
15:47:27.463	1	1	1	1	1	1	1	1	1	1	1	1	1	1	1	1	1	1	1
15:47:28.434	1	1	1	1	1	1	1	1	1	1	1	1	1	1	1	1	1	1	1
15:47:29.404	1	1	1	1	1	1	1	1	1	1	1	1	1	1	1	1	1	1	1
15:47:30.398	1	1	1	1	1	1	1	1	1	1	1	1	1	1	1	1	1	1	1
15:47:31.367	1	1	1	1	1	1	1	1	1	1	1	1	1	1	1	1	1	1	1
15:47:32.337	1	1	1	1	1	1	1	1	1	1	1	1	1	1	1	1	1	1	1
15:47:33.323	1	1	1	1	1	1	1	1	1	1	1	1	1	1	1	1	1	1	1
15:47:34.287	1	1	1	1	1	1	1	1	1	1	1	1	1	1	1	1	1	1	1
15:47:35.273	1	1	1	1	1	1	1	1	1	1	1	1	1	1	1	1	1	1	1
15:47:36.243	1	1	1	1	1	1	1	1	1	1	1	1	1	1	1	1	1	1	1
15:47:37.229	1	1	1	1	1	1	1	1	1	1	1	1	1	1	1	1	1	1	1
15:47:38.192	1	1	1	1	1	1	1	1	1	1	1	1	1	1	1	1	1	1	1
15:47:39.178	1	1	1	1	1	1	1	1	1	1	1	1	1	1	1	1	1	1	1
15:47:40.147	1	1	1	1	1	1	1	1	1	1	1	1	1	1	1	1	1	1	1
15:47:41.133	1	1	1	1	1	1	1	1	1	1	1	1	1	1	1	1	1	1	1
15:47:42.118	1	1	1	1	1	1	1	1	1	1	1	1	1	1	1	1	1	1	1
15:47:43.082	1	1	1	1	1	1	1	1	1	1	1	1	1	1	1	1	1	1	1
15:47:44.068	1	1	1	1	1	1	1	1	1	1	1	1	1	1	1	1	1	1	1
15:47:45.039	1	1	1	1	1	1	1	1	1	1	1	1	1	1	1	1	1	1	1
15:47:46.023	1	1	1	1	1	1	1	1	1	1	1	1	1	1	1	1	1	1	1
15:47:46.990	1	1	1	1	1	1	1	1	1	1	1	1	1	1	1	1	1	1	1
15:47:47.961	1	1	1	1	1	1	1	1	1	1	1	1	1	1	1	1	1	1	1
15:47:48.947	1	1	1	1	1	1	1	1	1	1	1	1	1	1	1	1	1	1	1
15:47:49.929	1	1	1	1	1	1	1	1	1	1	1	1	1	1	1	1	1	1	1
15:47:50.898	1	1	1	1	1	1	1	1	1	1	1	1	1	1	1	1	1	1	1
15:47:51.868	1	1	1	1	1	1	1	1	1	1	1	1	1	1	1	1	1	1	1
15:47:52.855	1	1	1	1	1	1	1	1	1	1	1	1	1	1	1	1	1	1	1
15:47:53.835	1	1	1	1	1	1	1	1	1	1	1	1	1	1	1	1	1	1	1
15:47:54.805	1	1	1	1	1	1	1	1	1	1	1	1	1	1	1	1	1	1	1
15:47:55.776	1	1	1	1	1	1	1	1	1	1	1	1	1	1	1	1	1	1	1
15:47:56.762	1	1	1	1	1	1	1	1	1	1	1	1	1	1	1	1	1	1	1
15:47:57.742	1	1	1	1	1	1	1	1	1	1	1	1	1	1	1	1	1	1	1
15:47:58.712	1	1	1	1	1	1	1	1	1	1	1	1	1	1	1	1	1	1	1
15:47:59.684	1	1	1	1	1	1	1	1	1	1	1	1	1	1	1	1	1	1	1
15:49:15.131	1	1	1	1	1	1	1	1	1	1	1	1	1	1	1	1	1	1	1
15:49:16.116	1	1	1	1	1	1	1	1	1	1	1	1	1	1	1	1	1	1	1
15:49:17.100	1	1	1	1	1	1	1	1	1	1	1	1	1	1	1	1	1	1	1
15:49:18.067	1	1	1	1	1	1	1	1	1	1	1	1	1	1	1	1	1	1	1
15:49:19.037	1	1	1	1	1	1	1	1	1	1	1	1	1	1	1	1	1	1	1
15:49:20.024	1	1	1	1	1	1	1	1	1	1	1	1	1	1	1	1	1	1	1
15:49:20.989	1	1	1	1	1	1	1	1	1	1	1	1	1	1	1	1	1	1	1
15:49:21.974	1	1	1	1	1	1	1	1	1	1	1	1	1	1	1	1	1	1	1
15:49:22.944	1	1	1	1	1	1	1	1	1	1	1	1	1	1	1	1	1	1	1
15:49:23.929	1	1	1	1	1	1	1	1	1	1	1	1	1	1	1	1	1	1	1
15:49:24.915	1	1	1	1	1	1	1	1	1	1	1	1	1	1	1	1	1	1	1
15:49:25.880	1	1	1	1	1	1	1	1	1	1	1	1	1	1	1	1	1	1	1
15:49:26.867	1	1	1	1	1	1	1	1	1	1	1	1	1	1	1	1	1	1	1
15:49:27.838	1	1	1	1	1	1	1	1	1	1	1	1	1	1	1	1	1	1	1
15:49:28.822	1	1	1	1	1	1	1	1	1	1	1	1	1	1	1	1	1	1	1
15:49:29.793	1	1	1	1	1	1	1	1	1	1	1	1	1	1	1	1	1	1	1
15:49:30.763	1	1	1	1	1	1	1	1	1	1	1	1	1	1	1	1	1	1	1
15:49:31.733	1	1	1	1	1	1	1	1	1	1	1	1	1	1	1	1	1	1	1
15:49:32.715	1	1	1	1	1	1	1	1	1	1	1	1	1	1	1	1	1	1	1
15:49:33.686	1	1	1	1	1	1	1	1	1	1	1	1	1	1	1	1	1	1	1
15:49:34.671	1	1	1	1	1	1	1	1	1	1	1	1	1	1	1	1	1	1	1
15:49:35.640	1	1	1	1	1	1	1	1	1	1	1	1	1	1	1	1	1	1	1
15:49:36.620	1	1	1	1	1	1	1	1	1	1	1	1	1	1	1	1	1	1	1
15:49:37.605	1	1	1	1	1	1	1	1	1	1	1	1	1	1	1	1	1	1	1
15:49:38.576	1	1	1	1	1	1	1	1	1	1	1	1	1	1	1	1	1	1	1
15:49:39.563	1	1	1	1	1	1	1	1	1	1	1	1	1	1	1	1	1	1	1
15:49:40.527	1	1	1	1	1	1	1	1	1	1	1	1	1	1	1	1	1	1	1
15:49:41.513	1	1	1	1	1	1	1	1	1	1	1	1	1	1	1	1	1	1	1
15:49:42.483	1	1	1	1	1	1	1	1	1	1	1	1	1	1	1	1	1	1	1
15:49:43.454	1	1	1	1	1	1	1	1	1	1	1	1	1	1	1	1	1	1	1
15:49:44.435	1	1	1	1	1	1	1	1	1	1	1	1	1	1	1	1	1	1	1
15:49:45.407	1	1	1	1	1	1	1	1	1	1	1	1	1	1	1	1	1	1	1
15:49:46.393	1	1	1	1	1	1	1	1	1	1	1	1	1	1	1	1	1	1	1
15:49:47.362	1	1	1	1	1	1	1	1	1	1	1	1	1	1	1	1	1	1	1
15:49:48.341	1	1	1	1	1	1	1	1	1	1	1	1	1	1	1	1	1	1	1
15:49:49.327	1	1	1	1	1	1	1	1	1	1	1	1	1	1	1	1	1	1	1
15:49:50.296	1	1	1	1	1	1	1	1	1	1	1	1	1	1	1	1	1	1	1
15:49:51.267	1	1	1	1	1	1	1	1	1	1	1	1	1	1	1	1	1	1	1
15:49:52.253	1	1	1	1	1	1	1	1	1	1	1	1	1	1	1	1	1	1	1
15:49:53.232	1	1	1	1	1	1	1	1	1	1	1	1	1	1	1	1	1	1	1
15:49:54.206	1	1	1	1	1	1	1	1	1	1	1	1	1	1	1	1	1	1	1
15:49:55.183	1	1	1	1	1	1	1	1	1	1	1	1	1	1	1	1	1	1	1
15:49:56.166	1	1	1	1	1	1	1	1	1	1	1	1	1	1	1	1	1	1	1
15:49:57.136	1	1	1	1	1	1	1	1	1	1	1	1	1	1	1	1	1	1	1
15:49:58.107	1	1	1	1	1	1	1	1	1	1	1	1	1	1	1	1	1	1	1
15:49:59.093	1	1	1	1	1	1	1	1	1	1	1	1	1	1	1	1	1	1	1
15:50:00.057	1	1	1	1	1	1	1	1	1	1	1	1	1	1	1	1	1	1	1
15:51:15.977	1	1	1	1	1	1	1	1	1	1	1	1	1	1	1	1	1	1	1
15:51:16.964	1	1	1	1	1	1	1	1	1	1	1	1	1	1	1	1	1	1	1
15:51:17.928	1	1	1	1	1	1	1	1	1	1	1	1	1	1	1	1	1	1	1
15:51:18.914	1	1	1	1	1	1	1	1	1	1	1	1	1	1	1	1	1	1	1
15:51:19.885	1	1	1	1	1	1	1	1	1	1	1	1	1	1	1	1	1	1	1
15:51:20.872	1	1	1	1	1	1	1	1	1	1	1	1	1	1	1	1	1	1	1
15:51:21.836	1	1	1	1	1	1	1	1	1	1	1	1	1	1	1	1	1	1	1
15:51:22.823	1	1	1	1	1	1	1	1	1	1	1	1	1	1	1	1	1	1	1
15:51:23.795	1	1	1	1	1	1	1	1	1	1	1	1	1	1	1	1	1	1	1
15:51:24.776	1	1	1	1	1	1	1	1	1	1	1	1	1	1	1	1	1	1	1
15:51:25.745	1	1	1	1	1	1	1	1	1	1	1	1	1	1	1	1	1	1	1
15:51:26.731	1	1	1	1	1	1	1	1	1	1	1	1	1	1	1	1	1	1	1
15:51:27.701	1	1	1	1	1	1	1	1	1	1	1	1	1	1	1	1	1	1	1
15:51:28.683	1	1	1	1	1	1	1	1	1	1	1	1	1	1	1	1	1	1	1
15:51:29.651	1	1	1	1	1	1	1	1	1	1	1	1	1	1	1	1	1	1	1
15:51:30.639	1	1	1	1	1	1	1	1	1	1	1	1	1	1	1	1	1	1	1
15:51:31.609	1	1	1	1	1	1	1	1	1	1	1	1	1	1	1	1	1	1	1
15:51:32.591	1	1	1	1	1	1	1	1	1	1	1	1	1	1	1	1	1	1	1
15:51:33.558	1	1	1	1	1	1	1	1	1	1	1	1	1	1	1	1	1	1	1
15:51:34.544	1	1	1	1	1	1	1	1	1	1	1	1	1	1	1	1	1	1	1
15:51:35.514	1	1	1	1	1	1	1	1	1	1	1	1	1	1	1	1	1	1	1
15:51:36.500	1	1	1	1	1	1	1	1	1	1	1	1	1	1	1	1	1	1	1
15:51:37.465	1	1	1	1	1	1	1	1	1	1	1	1	1	1	1	1	1	1	1
15:51:38.450	1	1	1	1	1	1	1	1	1	1	1	1	1	1	1	1	1	1	1
15:51:39.421	1	1	1	1	1	1	1	1	1	1	1	1	1	1	1	1	1	1	1
15:51:40.406	1	1	1	1	1	1	1	1	1	1	1	1	1	1	1	1	1	1	1
15:51:41.372	1	1	1	1	1	1	1	1	1	1	1	1	1	1	1	1	1	1	1
15:51:42.341	1	1	1	1	1	1	1	1	1	1	1	1	1	1	1	1	1	1	1
15:51:43.328	1	1	1	1	1	1	1	1	1	1	1	1	1	1	1	1	1	1	1
15:51:44.308	1	1	1	1	1	1	1	1	1	1	1	1	1	1	1	1	1	1	1
15:51:45.279	1	1	1	1	1	1	1	1	1	1	1	1	1	1	1	1	1	1	1
15:51:46.250	1	1	1	1	1	1	1	1	1	1	1	1	1	1	1	1	1	1	1
15:51:47.236	1	1	1	1	1	1	1	1	1	1	1	1	1	1	1	1	1	1	1
15:51:48.201	1	1	1	1	1	1	1	1	1	1	1	1	1	1	1	1	1	1	1
15:51:49.186	1	1	1	1	1	1	1	1	1	1	1	1	1	1	1	1	1	1	1
15:51:50.158	1	1	1	1	1	1	1	1	1	1	1	1	1	1	1	1	1	1	1
15:51:51.144	1	1	1	1	1	1	1	1	1	1	1	1	1	1	1	1	1	1	1
15:51:52.109	1	1	1	1	1	1	1	1	1	1	1	1	1	1	1	1	1	1	1
15:51:53.095	1	1	1	1	1	1	1	1	1	1	1	1	1	1	1	1	1	1	1
15:51:54.079	1	1	1	1	1	1	1	1	1	1	1	1	1	1	1	1	1	1	1
15:51:55.050	1	1	1	1	1	1	1	1	1	1	1	1	1	1	1	1	1	1	1
15:51:56.015	1	1	1	1	1	1	1	1	1	1	1	1	1	1	1	1	1	1	1
15:51:57.002	1	1	1	1	1	1	1	1	1	1	1	1	1	1	1	1	1	1	1
15:51:57.972	1	1	1	1	1	1	1	1	1	1	1	1	1	1	1	1	1	1	1
15:51:58.944	1	1	1	1	1	1	1	1	1	1	1	1	1	1	1	1	1	1	1
15:51:59.925	1	1	1	1	1	1	1	1	1	1	1	1	1	1	1	1	1	1	1
15:53:15.319	1	1	1	1	1	1	1	1	1	1	1	1	1	1	1	1	1	1	1
15:53:16.301	1	1	1	1	1	1	1	1	1	1	1	1	1	1	1	1	1	1	1
15:53:17.271	1	1	1	1	1	1	1	1	1	1	1	1	1	1	1	1	1	1	1
15:53:18.241	1	1	1	1	1	1	1	1	1	1	1	1	1	1	1	1	1	1	1
15:53:19.226	1	1	1	1	1	1	1	1	1	1	1	1	1	1	1	1	1	1	1
15:53:20.207	1	1	1	1	1	1	1	1	1	1	1	1	1	1	1	1	1	1	1
15:53:21.177	1	1	1	1	1	1	1	1	1	1	1	1	1	1	1	1	1	1	1
15:53:22.147	1	1	1	1	1	1	1	1	1	1	1	1	1	1	1	1	1	1	1
15:53:23.134	1	1	1	1	1	1	1	1	1	1	1	1	1	1	1	1	1	1	1
15:53:24.098	1	1	1	1	1	1	1	1	1	1	1	1	1	1	1	1	1	1	1
15:53:25.085	1	1	1	1	1	1	1	1	1	1	1	1	1	1	1	1	1	1	1
15:53:26.056	1	1	1	1	1	1	1	1	1	1	1	1	1	1	1	1	1	1	1
15:53:27.040	1	1	1	1	1	1	1	1	1	1	1	1	1	1	1	1	1	1	1
15:53:28.019	1	1	1	1	1	1	1	1	1	1	1	1	1	1	1	1	1	1	1
15:53:28.989	1	1	1	1	1	1	1	1	1	1	1	1	1	1	1	1	1	1	1
15:53:29.959	1	1	1	1	1	1	1	1	1	1	1	1	1	1	1	1	1	1	1
15:53:30.944	1	1	1	1	1	1	1	1	1	1	1	1	1	1	1	1	1	1	1
15:53:31.908	1	1	1	1	1	1	1	1	1	1	1	1	1	1	1	1	1	1	1
15:53:32.895	1	1	1	1	1	1	1	1	1	1	1	1	1	1	1	1	1	1	1
15:53:33.867	1	1	1	1	1	1	1	1	1	1	1	1	1	1	1	1	1	1	1
15:53:34.853	1	1	1	1	1	1	1	1	1	1	1	1	1	1	1	1	1	1	1
15:53:35.817	1	1	1	1	1	1	1	1	1	1	1	1	1	1	1	1	1	1	1
15:53:36.803	1	1	1	1	1	1	1	1	1	1	1	1	1	1	1	1	1	1	1
15:53:37.775	1	1	1	1	1	1	1	1	1	1	1	1	1	1	1	1	1	1	1
15:53:38.761	1	1	1	1	1	1	1	1	1	1	1	1	1	1	1	1	1	1	1
15:53:39.726	1	1	1	1	1	1	1	1	1	1	1	1	1	1	1	1	1	1	1
15:53:40.711	1	1	1	1	1	1	1	1	1	1	1	1	1	1	1	1	1	1	1
15:53:41.683	1	1	1	1	1	1	1	1	1	1	1	1	1	1	1	1	1	1	1
15:53:42.667	1	1	1	1	1	1	1	1	1	1	1	1	1	1	1	1	1	1	1
15:53:43.633	1	1	1	1	1	1	1	1	1	1	1	1	1	1	1	1	1	1	1
15:53:44.618	1	1	1	1	1	1	1	1	1	1	1	1	1	1	1	1	1	1	1
15:53:45.589	1	1	1	1	1	1	1	1	1	1	1	1	1	1	1	1	1	1	1
15:53:46.574	1	1	1	1	1	1	1	1	1	1	1	1	1	1	1	1	1	1	1
15:53:47.540	1	1	1	1	1	1	1	1	1	1	1	1	1	1	1	1	1	1	1
15:53:48.526	1	1	1	1	1	1	1	1	1	1	1	1	1	1	1	1	1	1	1
15:53:49.497	1	1	1	1	1	1	1	1	1	1	1	1	1	1	1	1	1	1	1
15:53:50.481	1	1	1	1	1	1	1	1	1	1	1	1	1	1	1	1	1	1	1
15:53:51.446	1	1	1	1	1	1	1	1	1	1	1	1	1	1	1	1	1	1	1
15:53:52.434	1	1	1	1	1	1	1	1	1	1	1	1	1	1	1	1	1	1	1
15:53:53.403	1	1	1	1	1	1	1	1	1	1	1	1	1	1	1	1	1	1	1
15:53:54.368	1	1	1	1	1	1	1	1	1	1	1	1	1	1	1	1	1	1	1
15:53:55.355	1	1	1	1	1	1	1	1	1	1	1	1	1	1	1	1	1	1	1
15:53:56.326	1	1	1	1	1	1	1	1	1	1	1	1	1	1	1	1	1	1	1
15:53:57.311	1	1	1	1	1	1	1	1	1	1	1	1	1	1	1	1	1	1	1
15:53:58.291	1	1	1	1	1	1	1	1	1	1	1	1	1	1	1	1	1	1	1
15:53:59.262	1	1	1	1	1	1	1	1	1	1	1	1	1	1	1	1	1	1	1
15:55:15.246	1	1	1	1	1	1	1	1	1	1	1	1	1	1	1	1	1	1	1
15:55:16.226	1	1	1	1	1	1	1	1	1	1	1	1	1	1	1	1	1	1	1
15:55:17.197	1	1	1	1	1	1	1	1	1	1	1	1	1	1	1	1	1	1	1
15:55:18.166	1	1	1	1	1	1	1	1	1	1	1	1	1	1	1	1	1	1	1
15:55:19.152	1	1	1	1	1	1	1	1	1	1	1	1	1	1	1	1	1	1	1
15:55:20.132	1	1	1	1	1	1	1	1	1	1	1	1	1	1	1	1	1	1	1
15:55:21.103	1	1	1	1	1	1	1	1	1	1	1	1	1	1	1	1	1	1	1
15:55:22.074	1	1	1	1	1	1	1	1	1	1	1	1	1	1	1	1	1	1	1
15:55:23.059	1	1	1	1	1	1	1	1	1	1	1	1	1	1	1	1	1	1	1
15:55:24.044	1	1	1	1	1	1	1	1	1	1	1	1	1	1	1	1	1	1	1
15:55:25.009	1	1	1	1	1	1	1	1	1	1	1	1	1	1	1	1	1	1	1
15:55:25.996	1	1	1	1	1	1	1	1	1	1	1	1	1	1	1	1	1	1	1
15:55:26.967	1	1	1	1	1	1	1	1	1	1	1	1	1	1	1	1	1	1	1
15:55:27.949	1	1	1	1	1	1	1	1	1	1	1	1	1	1	1	1	1	1	1
15:55:28.917	1	1	1	1	1	1	1	1	1	1	1	1	1	1	1	1	1	1	1
15:55:29.904	1	1	1	1	1	1	1	1	1	1	1	1	1	1	1	1	1	1	1
15:55:30.875	1	1	1	1	1	1	1	1	1	1	1	1	1	1	1	1	1	1	1
15:55:31.855	1	1	1	1	1	1	1	1	1	1	1	1	1	1	1	1	1	1	1
15:55:32.825	1	1	1	1	1	1	1	1	1	1	1	1	1	1	1	1	1	1	1
15:55:33.796	1	1	1	1	1	1	1	1	1	1	1	1	1	1	1	1	1	1	1
15:55:34.766	1	1	1	1	1	1	1	1	1	1	1	1	1	1	1	1	1	1	1
15:55:35.747	1	1	1	1	1	1	1	1	1	1	1	1	1	1	1	1	1	1	1
15:55:36.733	1	1	1	1	1	1	1	1	1	1	1	1	1	1	1	1	1	1	1
15:55:37.703	1	1	1	1	1	1	1	1	1	1	1	1	1	1	1	1	1	1	1
15:55:38.674	1	1	1	1	1	1	1	1	1	1	1	1	1	1	1	1	1	1	1
15:55:39.655	1	1	1	1	1	1	1	1	1	1	1	1	1	1	1	1	1	1	1
15:55:40.640	1	1	1	1	1	1	1	1	1	1	1	1	1	1	1	1	1	1	1
15:55:41.612	1	1	1	1	1	1	1	1	1	1	1	1	1	1	1	1	1	1	1
15:55:42.581	1	1	1	1	1	1	1	1	1	1	1	1	1	1	1	1	1	1	1
15:55:43.562	1	1	1	1	1	1	1	1	1	1	1	1	1	1	1	1	1	1	1
15:55:44.532	1	1	1	1	1	1	1	1	1	1	1	1	1	1	1	1	1	1	1
15:55:45.519	1	1	1	1	1	1	1	1	1	1	1	1	1	1	1	1	1	1	1
15:55:46.488	1	1	1	1	1	1	1	1	1	1	1	1	1	1	1	1	1	1	1
15:55:47.469	1	1	1	1	1	1	1	1	1	1	1	1	1	1	1	1	1	1	1
15:55:48.439	1	1	1	1	1	1	1	1	1	1	1	1	1	1	1	1	1	1	1
15:55:49.425	1	1	1	1	1	1	1	1	1	1	1	1	1	1	1	1	1	1	1
15:55:50.396	1	1	1	1	1	1	1	1	1	1	1	1	1	1	1	1	1	1	1
15:55:51.376	1	1	1	1	1	1	1	1	1	1	1	1	1	1	1	1	1	1	1
15:55:52.347	1	1	1	1	1	1	1	1	1	1	1	1	1	1	1	1	1	1	1
15:55:53.333	1	1	1	1	1	1	1	1	1	1	1	1	1	1	1	1	1	1	1
15:55:54.303	1	1	1	1	1	1	1	1	1	1	1	1	1	1	1	1	1	1	1
15:55:55.283	1	1	1	1	1	1	1	1	1	1	1	1	1	1	1	1	1	1	1
15:55:56.254	1	1	1	1	1	1	1	1	1	1	1	1	1	1	1	1	1	1	1
15:55:57.240	1	1	1	1	1	1	1	1	1	1	1	1	1	1	1	1	1	1	1
15:55:58.210	1	1	1	1	1	1	1	1	1	1	1	1	1	1	1	1	1	1	1
15:55:59.190	1	1	1	1	1	1	1	1	1	1	1	1	1	1	1	1	1	1	1
15:56:00.159	1	1	1	1	1	1	1	1	1	1	1	1	1	1	1	1	1	1	1
15:57:15.660	1	1	1	1	1	1	1	1	1	1	1	1	1	1	1	1	1	1	1
15:57:16.646	1	1	1	1	1	1	1	1	1	1	1	1	1	1	1	1	1	1	1
15:57:17.616	1	1	1	1	1	1	1	1	1	1	1	1	1	1	1	1	1	1	1
15:57:18.597	1	1	1	1	1	1	1	1	1	1	1	1	1	1	1	1	1	1	1
15:57:19.566	1	1	1	1	1	1	1	1	1	1	1	1	1	1	1	1	1	1	1
15:57:20.552	1	1	1	1	1	1	1	1	1	1	1	1	1	1	1	1	1	1	1
15:57:21.523	1	1	1	1	1	1	1	1	1	1	1	1	1	1	1	1	1	1	1
15:57:22.502	1	1	1	1	1	1	1	1	1	1	1	1	1	1	1	1	1	1	1
15:57:23.473	1	1	1	1	1	1	1	1	1	1	1	1	1	1	1	1	1	1	1
15:57:24.459	1	1	1	1	1	1	1	1	1	1	1	1	1	1	1	1	1	1	1
15:57:25.432	1	1	1	1	1	1	1	1	1	1	1	1	1	1	1	1	1	1	1
15:57:26.396	1	1	1	1	1	1	1	1	1	1	1	1	1	1	1	1	1	1	1
15:57:27.383	1	1	1	1	1	1	1	1	1	1	1	1	1	1	1	1	1	1	1
15:57:28.352	1	1	1	1	1	1	1	1	1	1	1	1	1	1	1	1	1	1	1
15:57:29.338	1	1	1	1	1	1	1	1	1	1	1	1	1	1	1	1	1	1	1
15:57:30.318	1	1	1	1	1	1	1	1	1	1	1	1	1	1	1	1	1	1	1
15:57:31.288	1	1	1	1	1	1	1	1	1	1	1	1	1	1	1	1	1	1	1
15:57:32.274	1	1	1	1	1	1	1	1	1	1	1	1	1	1	1	1	1	1	1
15:57:33.244	1	1	1	1	1	1	1	1	1	1	1	1	1	1	1	1	1	1	1
15:57:34.225	1	1	1	1	1	1	1	1	1	1	1	1	1	1	1	1	1	1	1
15:57:35.196	1	1	1	1	1	1	1	1	1	1	1	1	1	1	1	1	1	1	1
15:57:36.166	1	1	1	1	1	1	1	1	1	1	1	1	1	1	1	1	1	1	1
15:57:37.152	1	1	1	1	1	1	1	1	1	1	1	1	1	1	1	1	1	1	1
15:57:38.118	1	1	1	1	1	1	1	1	1	1	1	1	1	1	1	1	1	1	1
15:57:39.105	1	1	1	1	1	1	1	1	1	1	1	1	1	1	1	1	1	1	1
15:57:40.074	1	1	1	1	1	1	1	1	1	1	1	1	1	1	1	1	1	1	1
15:57:41.061	1	1	1	1	1	1	1	1	1	1	1	1	1	1	1	1	1	1	1
15:57:42.025	1	1	1	1	1	1	1	1	1	1	1	1	1	1	1	1	1	1	1
15:57:43.012	1	1	1	1	1	1	1	1	1	1	1	1	1	1	1	1	1	1	1
15:57:43.983	1	1	1	1	1	1	1	1	1	1	1	1	1	1	1	1	1	1	1
15:57:44.966	1	1	1	1	1	1	1	1	1	1	1	1	1	1	1	1	1	1	1
15:57:45.932	1	1	1	1	1	1	1	1	1	1	1	1	1	1	1	1	1	1	1
15:57:46.919	1	1	1	1	1	1	1	1	1	1	1	1	1	1	1	1	1	1	1
15:57:47.888	1	1	1	1	1	1	1	1	1	1	1	1	1	1	1	1	1	1	1
15:57:48.872	1	1	1	1	1	1	1	1	1	1	1	1	1	1	1	1	1	1	1
15:57:49.841	1	1	1	1	1	1	1	1	1	1	1	1	1	1	1	1	1	1	1
15:57:50.826	1	1	1	1	1	1	1	1	1	1	1	1	1	1	1	1	1	1	1
15:57:51.797	1	1	1	1	1	1	1	1	1	1	1	1	1	1	1	1	1	1	1
15:57:52.783	1	1	1	1	1	1	1	1	1	1	1	1	1	1	1	1	1	1	1
15:57:53.749	1	1	1	1	1	1	1	1	1	1	1	1	1	1	1	1	1	1	1
15:57:54.735	1	1	1	1	1	1	1	1	1	1	1	1	1	1	1	1	1	1	1
15:57:55.705	1	1	1	1	1	1	1	1	1	1	1	1	1	1	1	1	1	1	1
15:57:56.686	1	1	1	1	1	1	1	1	1	1	1	1	1	1	1	1	1	1	1
15:57:57.656	1	1	1	1	1	1	1	1	1	1	1	1	1	1	1	1	1	1	1
15:57:58.642	1	1	1	1	1	1	1	1	1	1	1	1	1	1	1	1	1	1	1
15:57:59.612	1	1	1	1	1	1	1	1	1	1	1	1	1	1	1	1	1	1	1
15:59:15.520	1	1	1	1	1	1	1	1	1	1	1	1	1	1	1	1	1	1	1
15:59:16.488	1	1	1	1	1	1	1	1	1	1	1	1	1	1	1	1	1	1	1
15:59:17.475	1	1	1	1	1	1	1	1	1	1	1	1	1	1	1	1	1	1	1
15:59:18.445	1	1	1	1	1	1	1	1	1	1	1	1	1	1	1	1	1	1	1
15:59:19.428	1	1	1	1	1	1	1	1	1	1	1	1	1	1	1	1	1	1	1
15:59:20.395	1	1	1	1	1	1	1	1	1	1	1	1	1	1	1	1	1	1	1
15:59:21.381	1	1	1	1	1	1	1	1	1	1	1	1	1	1	1	1	1	1	1
15:59:22.351	1	1	1	1	1	1	1	1	1	1	1	1	1	1	1	1	1	1	1
15:59:23.335	1	1	1	1	1	1	1	1	1	1	1	1	1	1	1	1	1	1	1
15:59:24.302	1	1	1	1	1	1	1	1	1	1	1	1	1	1	1	1	1	1	1
15:59:25.272	1	1	1	1	1	1	1	1	1	1	1	1	1	1	1	1	1	1	1
15:59:26.258	1	1	1	1	1	1	1	1	1	1	1	1	1	1	1	1	1	1	1
15:59:27.237	1	1	1	1	1	1	1	1	1	1	1	1	1	1	1	1	1	1	1
15:59:28.208	1	1	1	1	1	1	1	1	1	1	1	1	1	1	1	1	1	1	1
15:59:29.178	1	1	1	1	1	1	1	1	1	1	1	1	1	1	1	1	1	1	1
15:59:30.164	1	1	1	1	1	1	1	1	1	1	1	1	1	1	1	1	1	1	1
15:59:31.144	1	1	1	1	1	1	1	1	1	1	1	1	1	1	1	1	1	1	1
15:59:32.114	1	1	1	1	1	1	1	1	1	1	1	1	1	1	1	1	1	1	1
15:59:33.085	1	1	1	1	1	1	1	1	1	1	1	1	1	1	1	1	1	1	1
15:59:34.070	1	1	1	1	1	1	1	1	1	1	1	1	1	1	1	1	1	1	1
15:59:35.053	1	1	1	1	1	1	1	1	1	1	1	1	1	1	1	1	1	1	1
15:59:36.021	1	1	1	1	1	1	1	1	1	1	1	1	1	1	1	1	1	1	1
15:59:37.006	1	1	1	1	1	1	1	1	1	1	1	1	1	1	1	1	1	1	1
15:59:37.976	1	1	1	1	1	1	1	1	1	1	1	1	1	1	1	1	1	1	1
15:59:38.955	1	1	1	1	1	1	1	1	1	1	1	1	1	1	1	1	1	1	1
15:59:39.925	1	1	1	1	1	1	1	1	1	1	1	1	1	1	1	1	1	1	1
15:59:40.897	1	1	1	1	1	1	1	1	1	1	1	1	1	1	1	1	1	1	1
15:59:41.883	1	1	1	1	1	1	1	1	1	1	1	1	1	1	1	1	1	1	1
15:59:42.848	1	1	1	1	1	1	1	1	1	1	1	1	1	1	1	1	1	1	1
15:59:43.834	1	1	1	1	1	1	1	1	1	1	1	1	1	1	1	1	1	1	1
15:59:44.803	1	1	1	1	1	1	1	1	1	1	1	1	1	1	1	1	1	1	1
15:59:45.787	1	1	1	1	1	1	1	1	1	1	1	1	1	1	1	1	1	1	1
15:59:46.768	1	1	1	1	1	1	1	1	1	1	1	1	1	1	1	1	1	1	1
15:59:47.734	1	1	1	1	1	1	1	1	1	1	1	1	1	1	1	1	1	1	1
15:59:48.719	1	1	1	1	1	1	1	1	1	1	1	1	1	1	1	1	1	1	1
15:59:49.689	1	1	1	1	1	1	1	1	1	1	1	1	1	1	1	1	1	1	1
15:59:50.674	1	1	1	1	1	1	1	1	1	1	1	1	1	1	1	1	1	1	1
15:59:51.637	1	1	1	1	1	1	1	1	1	1	1	1	1	1	1	1	1	1	1
15:59:52.622	1	1	1	1	1	1	1	1	1	1	1	1	1	1	1	1	1	1	1
15:59:53.607	1	1	1	1	1	1	1	1	1	1	1	1	1	1	1	1	1	1	1
15:59:54.576	1	1	1	1	1	1	1	1	1	1	1	1	1	1	1	1	1	1	1
15:59:55.556	1	1	1	1	1	1	1	1	1	1	1	1	1	1	1	1	1	1	1
15:59:56.525	1	1	1	1	1	1	1	1	1	1	1	1	1	1	1	1	1	1	1
15:59:57.510	1	1	1	1	1	1	1	1	1	1	1	1	1	1	1	1	1	1	1
15:59:58.481	1	1	1	1	1	1	1	1	1	1	1	1	1	1	1	1	1	1	1
15:59:59.460	1	1	1	1	1	1	1	1	1	1	1	1	1	1	1	1	1	1	1
[truncated: 4,948 more rows]
