# Supplementary material for: Measurements of spectral irradiance during the solar eclipse of 21 August 2017: reassessment of the effect of solar limb darkening and of changes in total ozone
Source: Copernicus journal article supplement (doi:10.5194/acp-2018-1048), 2018-11-02
Supplement: Supplementary file 1 [file acp-2018-1048-supplement.zip › Fig11d_Meas_to_Waldmeier.csv]

Time (UT)	306 (1)	306 (2)	315	320	340 (1)	340 (2)	380	395	412	443	490	532	555 (1)	555 (2)	665	875	940	1020
14:35:14.496	1.087720233	1.146269253	0.916928826	0.919602446	0.909506564	0.908907431	0.931432985	0.932442115	0.936653308	0.937565933	0.928809586	0.922114704	0.92281405	0.921523335	0.915114382	0.918733869	0.898335573	0.921422237
14:35:15.360	1.037491065	1.08868012	0.916918066	0.919281507	0.909568728	0.909247641	0.931736681	0.932593227	0.936661769	0.937655211	0.929206905	0.922042009	0.923257538	0.9216567	0.915333983	0.919306217	0.898767684	0.921832442
14:35:16.224	1.039513622	1.086364574	0.916999862	0.919492566	0.909689976	0.909348817	0.931858809	0.932735622	0.9368078	0.937820205	0.929498842	0.92238645	0.92361841	0.921985821	0.915800726	0.919897121	0.899534916	0.922571887
14:35:17.952	1.036568557	1.093354032	0.917182639	0.91932874	0.909664173	0.909261413	0.931850106	0.932697563	0.936729985	0.937759923	0.929408048	0.922347475	0.923489502	0.921864006	0.915653859	0.919710445	0.899426086	0.922552917
14:35:18.816	1.032259292	1.091916515	0.917125168	0.919266289	0.909629276	0.909281722	0.931856161	0.932735896	0.936771499	0.937831052	0.929575116	0.922522398	0.923733642	0.922109661	0.915993679	0.920402895	0.900064073	0.923308894
14:35:19.680	1.029675735	1.098853989	0.917086195	0.919314051	0.909586452	0.909226881	0.931854598	0.932630011	0.93666567	0.937704421	0.929405513	0.922348032	0.923589056	0.921915383	0.915750548	0.920097812	0.899842934	0.923188131
14:35:20.544	1.025117399	1.100272875	0.916953917	0.919356877	0.909571069	0.909360937	0.931907855	0.932656533	0.936729928	0.937772287	0.92961126	0.922530456	0.923805757	0.922214241	0.91619841	0.92088524	0.900587171	0.924208349
14:35:21.408	1.031084592	1.113732247	0.917446125	0.919280472	0.909522044	0.909287803	0.931935154	0.932665004	0.936704232	0.937736807	0.929552816	0.922526	0.9237849	0.922188532	0.916248743	0.921053559	0.90078807	0.924499171
14:35:22.272	1.036960606	1.115754442	0.91708675	0.919259929	0.909616562	0.909142319	0.931892507	0.932620536	0.936709537	0.937780504	0.92963569	0.922658584	0.923916771	0.922354442	0.916552946	0.921615407	0.901355598	0.925176819
14:35:23.136	1.03491718	1.089008008	0.917120136	0.919225096	0.909548135	0.909169161	0.931932879	0.932714547	0.936788076	0.937889837	0.929861863	0.923037716	0.924231987	0.922744615	0.917161924	0.922467803	0.902320782	0.926397183
14:35:24.000	1.02740783	1.111616347	0.917026599	0.919190845	0.909476262	0.909124582	0.931861403	0.932663242	0.936685929	0.937784029	0.929717172	0.922864778	0.924219905	0.922557072	0.917022231	0.922330605	0.902160658	0.926296929
14:35:25.728	1.033971943	1.098227624	0.917209165	0.919228919	0.909573571	0.909172365	0.93188979	0.932616645	0.936652696	0.937731621	0.929664723	0.922793221	0.924034917	0.922537833	0.916996478	0.922460764	0.902320331	0.926578334
14:35:26.592	1.03345096	1.100541226	0.917155554	0.919265198	0.909487853	0.909121152	0.931878889	0.932614963	0.936663059	0.937771907	0.929802484	0.923047366	0.924405663	0.922740343	0.917363323	0.923064223	0.903013613	0.927462109
14:35:27.456	1.031737062	1.110988828	0.917073208	0.919221214	0.909519553	0.909133333	0.931904547	0.932579818	0.93664458	0.937769493	0.929755125	0.922986733	0.924453424	0.922775969	0.917519688	0.923391623	0.903361633	0.927962376
14:35:28.320	1.03726942	1.09387924	0.916947769	0.919025516	0.909555038	0.909230082	0.931934729	0.932625418	0.936651859	0.937809276	0.929927611	0.923146664	0.924546851	0.922962009	0.917848105	0.923775846	0.903925804	0.928703559
14:35:29.184	1.033778821	1.125342248	0.916856973	0.919160814	0.909478072	0.909211412	0.93186644	0.932569632	0.936614767	0.937784461	0.929818541	0.923177243	0.924803208	0.923039833	0.918020243	0.92416119	0.904318985	0.929188458
14:35:30.048	1.038652526	1.114006172	0.916858159	0.919054605	0.909534668	0.909037851	0.931889181	0.932524636	0.936587606	0.937761913	0.929880968	0.923292479	0.924849701	0.92307784	0.918213853	0.924422916	0.904702763	0.92968937
14:35:30.912	1.037326595	1.09407908	0.917057456	0.91900795	0.909438361	0.909118731	0.931843866	0.932521956	0.936586943	0.937767002	0.929998032	0.923306973	0.924968559	0.923139537	0.918425548	0.924780146	0.90517504	0.930250468
14:35:31.776	1.036582318	1.109579406	0.916923097	0.919054569	0.909438331	0.909072117	0.931842088	0.932518898	0.936519645	0.937716945	0.929897064	0.923343373	0.925010152	0.923121026	0.918461636	0.925016372	0.905465704	0.930636109
14:35:33.504	1.038263064	1.099440972	0.916768671	0.918976528	0.909402673	0.909099954	0.93176819	0.932465975	0.936481461	0.937662924	0.929859246	0.923289318	0.924997415	0.923126417	0.918526396	0.925292711	0.905729362	0.931063113
14:35:34.368	1.033009785	1.090748403	0.917103665	0.919000544	0.909356645	0.90895115	0.931791347	0.932447359	0.936410925	0.937588633	0.92976176	0.923205848	0.924825077	0.92309379	0.918443322	0.925284154	0.905814546	0.93116979
14:35:35.232	1.041137478	1.109280546	0.916707078	0.918916731	0.909331487	0.908930429	0.931704973	0.932351839	0.936335015	0.937478456	0.929752991	0.923050279	0.924739813	0.922954238	0.918345512	0.92516194	0.90579445	0.931311508
14:35:36.096	1.029998896	1.087674025	0.916783568	0.918943294	0.909325554	0.908974004	0.931717558	0.93231428	0.936283561	0.937413896	0.929648058	0.923032112	0.924684065	0.922911425	0.918321354	0.925317221	0.905995786	0.931581196
14:35:36.960	1.029574049	1.120521305	0.917055804	0.918851195	0.909348054	0.908983263	0.931681626	0.932337196	0.936289936	0.937435214	0.929778411	0.923060256	0.92481966	0.923095781	0.918625295	0.925971343	0.906618111	0.932416367
14:35:37.824	1.03719454	1.106057464	0.916972407	0.918785261	0.909308215	0.90887709	0.93168355	0.932276395	0.936225334	0.937406599	0.929771602	0.923133217	0.924926755	0.9231067	0.918733333	0.926296907	0.906959633	0.932968204
14:35:38.688	1.032414263	1.096521207	0.916758222	0.918763032	0.909278393	0.908918156	0.93161325	0.932232321	0.936212133	0.937395766	0.929689606	0.92306177	0.924807144	0.923193326	0.919013223	0.926782743	0.907482596	0.93374645
14:35:40.416	1.033040431	1.101298398	0.91694326	0.918695123	0.909253661	0.908736693	0.931609268	0.932151871	0.936062368	0.93723673	0.929459051	0.922866349	0.924636291	0.92297007	0.91873453	0.926576447	0.907338017	0.933621822
14:35:41.280	1.036285135	1.105171131	0.916642157	0.91870733	0.909242909	0.90881961	0.931540943	0.932152176	0.936054874	0.937210528	0.929422672	0.92293885	0.924672804	0.923022647	0.918902399	0.926886309	0.907707853	0.934103746
14:35:42.144	1.034377243	1.103643509	0.916478166	0.918680035	0.909186731	0.908782164	0.931577019	0.932069631	0.935993325	0.937123102	0.929331367	0.922787549	0.924676033	0.922909296	0.91887769	0.927048394	0.907921339	0.934488372
14:35:43.008	1.025246469	1.118647826	0.916572888	0.918781091	0.909133756	0.908673909	0.931464541	0.93197679	0.935880885	0.936991154	0.929082428	0.922536043	0.924348497	0.922714179	0.91853779	0.926797388	0.907786322	0.934291238
14:35:43.872	1.036352075	1.11235759	0.91638089	0.91873449	0.909058701	0.908630834	0.931332949	0.931958185	0.935819811	0.936922261	0.929065242	0.922622264	0.924415759	0.922750228	0.918707732	0.927200022	0.908255661	0.934997609
14:35:44.736	1.028965221	1.101051684	0.916728834	0.91863462	0.909112755	0.90868737	0.93137355	0.931882059	0.935757661	0.936879542	0.929034759	0.922532718	0.924367839	0.92272592	0.918807499	0.927541253	0.90864666	0.935563119
14:35:45.600	1.032334561	1.112627298	0.916557359	0.918594162	0.909131761	0.908705539	0.931380138	0.931819219	0.935701636	0.936820855	0.928912059	0.922584814	0.924301448	0.922717938	0.918920525	0.927842348	0.908982293	0.936097749
14:35:46.464	1.036233075	1.108989713	0.916610176	0.91865965	0.909072251	0.908631551	0.931333629	0.931771905	0.935620712	0.936738353	0.928817303	0.922484977	0.92425683	0.922650175	0.918888908	0.928031432	0.909219152	0.93645425
14:35:48.192	1.033968709	1.115508694	0.916552196	0.918568189	0.908991247	0.908576869	0.931343973	0.931660201	0.935512123	0.936586898	0.928690543	0.922258895	0.924157219	0.922578032	0.918932886	0.928230745	0.909516392	0.93693645
14:35:49.056	1.033330547	1.109873161	0.916264373	0.91851984	0.908996387	0.908411494	0.931207882	0.931621521	0.93541678	0.936467176	0.928582692	0.922199999	0.924029558	0.922410735	0.918790254	0.928328247	0.909677542	0.937241118
14:35:49.920	1.028729766	1.095061154	0.916375297	0.918482444	0.908895086	0.908510247	0.931147733	0.931520105	0.935346026	0.936367382	0.928479596	0.922051758	0.923919389	0.922344737	0.918843376	0.928678207	0.910061636	0.937721246
14:35:50.784	1.031414035	1.117350239	0.916248042	0.91843716	0.908910275	0.908505691	0.93105413	0.931417482	0.935242316	0.936264891	0.928293122	0.9219447	0.923803732	0.922219648	0.918763536	0.928885126	0.910298688	0.938127774
14:35:51.648	1.034577259	1.104969332	0.916342759	0.918442402	0.908846788	0.908427888	0.931143783	0.931400918	0.935161431	0.936166931	0.928258143	0.921856739	0.923876142	0.922175603	0.918822493	0.929247951	0.910711613	0.938765939
14:35:52.512	1.028035806	1.090070348	0.916373898	0.918349552	0.908852682	0.908421736	0.930954968	0.931292073	0.935015334	0.935984047	0.92794915	0.92164558	0.923561038	0.921907565	0.918581514	0.929090514	0.910689994	0.938786267
14:35:53.376	1.031428261	1.111933449	0.916405372	0.918197665	0.908744242	0.90833014	0.930889006	0.931223303	0.934964388	0.93590553	0.927893196	0.921638828	0.923584932	0.92188791	0.918703737	0.929556344	0.911177364	0.939483567
14:35:54.240	1.030853396	1.105137066	0.916337022	0.918216016	0.908751672	0.908247504	0.93083728	0.931094164	0.934802105	0.935698866	0.927686777	0.921294307	0.923226009	0.921575057	0.918404822	0.929299189	0.911136093	0.939446838
14:35:55.968	1.027913297	1.115606387	0.916437041	0.918278241	0.908659708	0.908280547	0.930811141	0.931001319	0.934684769	0.935538503	0.927492159	0.921107524	0.923088986	0.921422554	0.918292657	0.929480228	0.911424344	0.939828444
14:35:56.832	1.035618597	1.106731184	0.916555504	0.918264688	0.90867779	0.908328669	0.930806134	0.930936313	0.934605092	0.935473576	0.927411812	0.921096555	0.923026409	0.92140395	0.918363176	0.929811993	0.911886116	0.940441646
14:35:57.696	1.031607862	1.09842897	0.916293119	0.918157428	0.908570343	0.908178485	0.930703199	0.930795387	0.934505085	0.935283801	0.927211678	0.920899834	0.92277011	0.921174059	0.918168888	0.92979475	0.911955058	0.940589972
14:35:58.560	1.031795327	1.109104813	0.916204334	0.918062843	0.908547275	0.908206674	0.930572526	0.930707827	0.934347417	0.935078261	0.926931124	0.92055868	0.922522971	0.920847815	0.917915914	0.929638827	0.91196666	0.940666748
14:35:59.424	1.031131572	1.104486936	0.916382663	0.91810527	0.908546603	0.907946659	0.930528533	0.930604722	0.934181651	0.934904074	0.926652767	0.920324127	0.92221544	0.920568907	0.917637082	0.929587663	0.911980934	0.94080025
14:36:00.288	1.032600444	1.107725404	0.916184591	0.918263628	0.908498506	0.908018404	0.930444211	0.930526541	0.934086207	0.934761573	0.92655391	0.920137639	0.922123395	0.920461557	0.917632471	0.929779669	0.912351076	0.941263377
14:37:15.456	1.017123392	1.142647832	0.915315426	0.916102489	0.906679538	0.90611199	0.928011821	0.926959582	0.929737557	0.929787283	0.921638782	0.915265396	0.917825059	0.915806496	0.913658899	0.92807403	0.915211705	0.942805122
14:37:16.320	1.03807123	1.115974365	0.914847744	0.91596756	0.90659913	0.906011601	0.927944772	0.926900561	0.929699587	0.929691792	0.921450278	0.915177544	0.917505421	0.915782077	0.913687331	0.928402418	0.91548998	0.942983395
14:37:18.048	1.034818521	1.113319461	0.915105526	0.916073327	0.906682873	0.906072512	0.928071856	0.926992362	0.929762803	0.929785313	0.921568428	0.915364306	0.917702467	0.91597019	0.914107889	0.92904401	0.916151336	0.943606066
14:37:18.912	1.032999736	1.115775865	0.915105459	0.916081582	0.906631328	0.906066343	0.927931787	0.926925784	0.929671852	0.929679204	0.921523784	0.915264599	0.917671817	0.915817467	0.913929264	0.928815706	0.916109181	0.943537072
14:37:19.776	1.034788975	1.11208831	0.915113666	0.916073443	0.906661808	0.906035884	0.92792706	0.926825108	0.929618258	0.929579796	0.921372351	0.915147141	0.917536757	0.915660051	0.913753866	0.928743056	0.915940156	0.943291858
14:37:20.640	1.033773205	1.108780789	0.91524893	0.916049508	0.906586365	0.905996454	0.927858752	0.926829228	0.929568258	0.929565188	0.921243369	0.915155128	0.917582135	0.91576213	0.913867521	0.928923777	0.916288964	0.943667072
14:37:21.504	1.045505331	1.129228198	0.915068437	0.916086342	0.906632784	0.905994986	0.927929132	0.926730086	0.929464473	0.929444128	0.92123439	0.914994268	0.91752135	0.915618381	0.913654397	0.928726271	0.916137185	0.943488241
14:37:22.368	1.045167524	1.115232367	0.914956409	0.916026387	0.906552499	0.905979523	0.927827698	0.926658354	0.929379648	0.929289523	0.92093164	0.914701728	0.917234778	0.915345213	0.913305757	0.928250615	0.915695795	0.942903598
14:37:23.232	1.037427671	1.123565741	0.915177049	0.915952471	0.906493059	0.905877357	0.927728231	0.926606583	0.929264985	0.929148657	0.920829305	0.914679423	0.917046553	0.915103127	0.912961686	0.92787319	0.915335137	0.942417126
14:37:24.960	1.036048295	1.125005884	0.91513094	0.916022694	0.906491288	0.905910883	0.927665059	0.926488548	0.92919453	0.929034145	0.920713196	0.914301016	0.916836681	0.914904119	0.912737823	0.927382728	0.914986666	0.941963354
14:37:25.824	1.031651892	1.097184887	0.915082526	0.915885924	0.906495935	0.905789783	0.92769856	0.92644631	0.929152407	0.929019736	0.920522769	0.914246453	0.916723365	0.914821288	0.912583275	0.927262635	0.914905757	0.941856335
14:37:26.688	1.034787866	1.119139285	0.915356731	0.915910649	0.9064927	0.90578983	0.927683835	0.926401624	0.92906598	0.928890849	0.92046452	0.91404517	0.9167126	0.914683833	0.912373963	0.926972076	0.914659738	0.941469129
14:37:27.552	1.034964942	1.133941217	0.914943659	0.915923784	0.906464983	0.905893022	0.927665952	0.926410586	0.929097994	0.928905503	0.92031094	0.914160041	0.916746238	0.9147663	0.912387835	0.927071203	0.91480101	0.941695139
14:37:28.416	1.040813424	1.118260418	0.914926117	0.915903561	0.90647623	0.905895092	0.927722205	0.926464389	0.929124957	0.929014363	0.920472964	0.914300524	0.916954124	0.91502436	0.912782399	0.927429106	0.915311536	0.942150557
14:37:29.280	1.036442587	1.111960833	0.914939083	0.915823787	0.906432955	0.90589582	0.927682197	0.926501674	0.92914077	0.929052227	0.920617039	0.914385663	0.917027298	0.915140876	0.912960658	0.927534051	0.915494684	0.942346688
14:37:30.144	1.040549692	1.129068926	0.915097632	0.915815099	0.906427557	0.905939911	0.927645064	0.92638911	0.929105051	0.92899781	0.920481637	0.914328655	0.916984827	0.915057878	0.912813038	0.92730486	0.915219845	0.942060065
14:37:31.008	1.043338405	1.121607299	0.914780854	0.915832392	0.906414294	0.905951088	0.927703804	0.926484485	0.929219303	0.929082512	0.920786827	0.914684797	0.917286963	0.91538942	0.913243531	0.9279468	0.915841497	0.942770284
14:37:32.736	1.040191321	1.14473477	0.914993048	0.915739074	0.906406772	0.905971431	0.927664278	0.926366117	0.929095078	0.928928712	0.920555586	0.914581956	0.916902451	0.915093666	0.912789249	0.927203188	0.915192886	0.941984341
14:37:33.600	1.035534713	1.116697628	0.915085473	0.915754872	0.906377053	0.905881644	0.927619512	0.926349832	0.929042345	0.928902898	0.920524112	0.914382592	0.916820308	0.915028985	0.912719035	0.927114317	0.915118006	0.941759139
14:37:34.464	1.035403737	1.104982423	0.915063158	0.915760989	0.906321381	0.905757996	0.927663066	0.926368698	0.929051912	0.928938181	0.920614496	0.914391227	0.916821412	0.915117065	0.91281071	0.92732109	0.915313675	0.942011741
14:37:35.328	1.026733414	1.11297315	0.914942078	0.915836904	0.906333559	0.905769891	0.927623613	0.926333916	0.928963497	0.928841529	0.9205628	0.914396945	0.916808707	0.915020169	0.912652049	0.927038438	0.915059007	0.941719016
14:37:36.192	1.039038792	1.117224875	0.915043049	0.915727571	0.906336537	0.905758915	0.927626717	0.926321768	0.929007519	0.92887625	0.920556866	0.914419803	0.916904346	0.915190129	0.912874009	0.927493045	0.915447008	0.942104405
14:37:37.056	1.040895846	1.117885874	0.915098934	0.915860891	0.906350198	0.905881237	0.927783864	0.926431686	0.929120905	0.929065122	0.920876091	0.914899466	0.917466703	0.915670053	0.913525091	0.928453863	0.916368496	0.943092706
14:37:37.920	1.03232338	1.13424338	0.915125067	0.915679749	0.906351414	0.905773882	0.927704705	0.926336248	0.928995947	0.928893541	0.920631389	0.914627407	0.917152373	0.915306506	0.913048982	0.927619012	0.915614746	0.942157946
14:37:38.784	1.036115729	1.141991869	0.915363582	0.915729419	0.906322763	0.905790894	0.927569747	0.926318469	0.92897483	0.928889209	0.920662624	0.914669055	0.917126876	0.915313778	0.913029867	0.92755483	0.915563625	0.942026184
14:37:40.512	1.042453981	1.135687064	0.914934759	0.915800932	0.906368288	0.905715039	0.927651599	0.926382837	0.929052559	0.928997536	0.920958424	0.914884326	0.917448375	0.915640575	0.91348822	0.928175512	0.916166421	0.94274001
14:37:41.376	1.040907534	1.12757286	0.914822922	0.915735225	0.906354937	0.905737761	0.927671458	0.926367875	0.929009458	0.928945525	0.920815226	0.914725238	0.91723927	0.915430836	0.913078638	0.927471557	0.915518508	0.941905926
14:37:42.240	1.045249011	1.127132294	0.915132976	0.915711887	0.906357472	0.905776699	0.927703864	0.926327738	0.928986576	0.928950815	0.920782367	0.914692881	0.917170245	0.915403776	0.913004289	0.927355602	0.915387432	0.941703756
14:37:43.104	1.041332827	1.127546732	0.915064738	0.915714238	0.906344407	0.905805096	0.927681634	0.926368936	0.929040582	0.929031698	0.921086917	0.914807139	0.917226249	0.915581346	0.913322866	0.927636204	0.915585997	0.941961445
14:37:43.968	1.042261571	1.114200298	0.914975611	0.915727549	0.90644721	0.905809356	0.927713592	0.926402551	0.929088366	0.929088229	0.921133203	0.914897046	0.917290003	0.915710257	0.913425055	0.927660694	0.915631341	0.942032466
14:37:44.832	1.045332962	1.113846143	0.914828774	0.915760452	0.906282335	0.90574419	0.927772021	0.926382068	0.929023392	0.929005373	0.920949581	0.914984541	0.917172884	0.915532647	0.913172518	0.927090341	0.915089093	0.94132617
14:37:45.696	1.032368115	1.136743338	0.914989156	0.915777517	0.906386087	0.905740815	0.927737946	0.926478082	0.929129608	0.929171403	0.921304831	0.915034589	0.917430183	0.915831024	0.913411577	0.927463508	0.915401553	0.941665276
14:37:47.424	1.04423267	1.130435583	0.915018796	0.915636086	0.906418458	0.905911174	0.927806708	0.926503079	0.929192873	0.929242341	0.921330685	0.915211176	0.91756693	0.916009011	0.913563449	0.92746207	0.915402746	0.941590785
14:37:48.288	1.047866856	1.119809051	0.915140519	0.915623947	0.906417934	0.905867402	0.927888509	0.926609755	0.929293098	0.929392735	0.921527699	0.915525749	0.917906061	0.916333423	0.914085279	0.927910078	0.915853408	0.942088578
14:37:49.152	1.043557382	1.126697467	0.915013439	0.91570166	0.906463228	0.905805828	0.927858349	0.92657067	0.929251284	0.929357098	0.921489222	0.915236932	0.917861947	0.916138815	0.9136961	0.927201573	0.915204477	0.941227444
14:37:50.016	1.037088487	1.120893619	0.914824624	0.915775542	0.906431954	0.905842061	0.927957311	0.926599692	0.929346197	0.929467575	0.921677385	0.915578037	0.918019839	0.916335097	0.913947914	0.927210418	0.915274102	0.941224666
14:37:50.880	1.043178882	1.103614407	0.915154905	0.91566091	0.906532103	0.905884515	0.928066976	0.926852829	0.929612879	0.929851158	0.922154191	0.916395013	0.918772386	0.917243621	0.915133486	0.928812871	0.916897616	0.943009596
14:37:51.744	1.047800141	1.130695134	0.915279459	0.915687178	0.906529608	0.90608162	0.928122924	0.926883584	0.929618783	0.929899263	0.922255399	0.91644319	0.918886996	0.917299007	0.915117767	0.928532395	0.916689869	0.942706659
14:37:52.608	1.042992067	1.12555444	0.91515699	0.915678446	0.906612032	0.906099364	0.928322338	0.927074201	0.929867686	0.930260179	0.922667934	0.917127261	0.919570393	0.918028716	0.916063827	0.929891839	0.91796254	0.94404915
14:37:53.472	1.048347359	1.113673091	0.915281103	0.915700283	0.906554697	0.906015972	0.928255897	0.927106256	0.929889828	0.930267017	0.922598989	0.917035162	0.919635972	0.918008771	0.915978291	0.929623244	0.917677557	0.943640393
14:37:55.200	1.040292518	1.130740116	0.915237541	0.915788527	0.90668447	0.906096066	0.928385333	0.927147758	0.929960087	0.930356085	0.922758137	0.917163443	0.919809359	0.918174028	0.916030161	0.929376115	0.917519412	0.943326106
14:37:56.064	1.042496805	1.134718884	0.915116285	0.91589823	0.906666699	0.906094621	0.928337601	0.927181869	0.929974837	0.930420663	0.922838427	0.917296741	0.919993037	0.918256831	0.916079893	0.92944007	0.917513451	0.943237023
14:37:56.928	1.04406563	1.122214956	0.915278652	0.915746642	0.906710939	0.906144834	0.928458393	0.927340051	0.930161002	0.930696455	0.923295783	0.917809474	0.920657333	0.918801747	0.916816961	0.93028114	0.918349143	0.944148966
14:37:57.792	1.045499465	1.109097443	0.915343102	0.915897046	0.906694174	0.906080697	0.92857423	0.927396727	0.930290437	0.930819855	0.923648622	0.918066117	0.920933918	0.919106142	0.917205436	0.930731054	0.918820687	0.944557546
14:37:58.656	1.043940917	1.119505442	0.915328249	0.915850501	0.906776423	0.906070041	0.928636071	0.927556779	0.930441316	0.931102574	0.924066659	0.918613654	0.921375683	0.919688505	0.917991686	0.931572524	0.91974225	0.945534316
14:37:59.520	1.042472802	1.141538176	0.915232706	0.915852705	0.906774575	0.906136013	0.928734604	0.927607299	0.930534071	0.93120122	0.924223789	0.918765245	0.921495108	0.919908404	0.918138479	0.93160497	0.919843684	0.945478479
14:39:15.552	1.024307633	1.086008599	0.915341429	0.91584843	0.907363332	0.906633429	0.930977115	0.929482541	0.932571851	0.934445681	0.929741938	0.92510548	0.928592172	0.927282651	0.925528293	0.936191555	0.924509019	0.948640459
14:39:16.416	1.047539687	1.128299878	0.915747218	0.915698479	0.907413571	0.9068396	0.93086291	0.929627278	0.932713754	0.934554518	0.92967605	0.925527388	0.928942387	0.927454388	0.925924706	0.936504545	0.924545336	0.948731514
14:39:17.280	1.047033241	1.122112771	0.916116299	0.915897716	0.907583896	0.907009463	0.931082656	0.929857375	0.932976531	0.934845527	0.930068368	0.925887824	0.929259649	0.927838351	0.926199905	0.936559703	0.924651226	0.948696741
14:39:18.144	1.044774785	1.134930635	0.91589544	0.915770367	0.907599884	0.907101935	0.931158065	0.929970072	0.93312249	0.935066495	0.930284859	0.926193471	0.929728755	0.928198539	0.926687379	0.936841925	0.92500305	0.949114218
14:39:19.008	1.050761726	1.129263791	0.916114469	0.915858608	0.907676911	0.906984872	0.93124573	0.930067999	0.933232898	0.935176318	0.930496096	0.926341368	0.929953279	0.928351747	0.926776245	0.936727781	0.924836573	0.948937926
14:39:20.736	1.048221247	1.143004638	0.915979739	0.915872012	0.907643192	0.907050714	0.931258761	0.930104731	0.933279631	0.935277232	0.93061788	0.926453706	0.930177201	0.928517644	0.926910568	0.936726696	0.924797769	0.948875241
14:39:21.600	1.041654065	1.12095641	0.916137896	0.915962169	0.907714631	0.907032468	0.931346673	0.930202589	0.933432489	0.935468478	0.930856657	0.926756349	0.930575523	0.928845138	0.927222333	0.936799087	0.924904114	0.948877354
14:39:22.464	1.056343066	1.141326905	0.916173539	0.91579117	0.907688988	0.907064377	0.931425473	0.930263661	0.933467703	0.935509847	0.930868449	0.926879062	0.930515761	0.928860643	0.927172551	0.936454613	0.924580902	0.948462933
14:39:23.328	1.042738311	1.145773485	0.916188519	0.915899725	0.907745562	0.907128252	0.931607636	0.930444911	0.93366089	0.935807787	0.931306941	0.927293018	0.930991648	0.929483559	0.92779939	0.9373207	0.925309621	0.949231639
14:39:24.192	1.052506657	1.11605952	0.916099703	0.91596438	0.907773074	0.907155435	0.931774007	0.930621826	0.93385231	0.936050058	0.931629455	0.927731366	0.931502563	0.929970082	0.928402022	0.937951276	0.925905462	0.949883703
14:39:25.056	1.044598307	1.114368706	0.916318797	0.915909997	0.907841823	0.907208295	0.931837592	0.930736227	0.934037098	0.936293851	0.932160507	0.928156598	0.931903503	0.930410328	0.928896077	0.938488769	0.926339273	0.9503039
14:39:25.920	1.047354018	1.117384564	0.916266765	0.915962465	0.907869493	0.907244244	0.931843654	0.930811385	0.934095039	0.936409694	0.932170074	0.928371217	0.932182854	0.930553245	0.929003659	0.938444107	0.92625941	0.950138693
14:39:27.648	1.040839853	1.140448341	0.916154617	0.915884698	0.907952417	0.907234169	0.932047348	0.930966389	0.934308821	0.93665477	0.932622225	0.928745708	0.93284813	0.931012178	0.929503133	0.938864321	0.926705461	0.950538767
14:39:28.512	1.042980423	1.137720544	0.916257493	0.915891289	0.907987327	0.907298519	0.93212106	0.931072688	0.934454769	0.936866536	0.932804713	0.928964488	0.933179007	0.931364983	0.929897349	0.939184785	0.926974362	0.950737282
14:39:29.376	1.043661985	1.130237942	0.916123894	0.915972635	0.908020793	0.907392805	0.932300435	0.931247005	0.934652728	0.937122446	0.933269216	0.929348345	0.93348985	0.931795074	0.930329959	0.939585954	0.927378741	0.951118561
14:39:30.240	1.044916758	1.1175487	0.916164458	0.916110025	0.908033763	0.90735792	0.932349422	0.93135653	0.934744528	0.937281061	0.933425052	0.929522623	0.933646622	0.932026569	0.93054279	0.93958488	0.927485022	0.951083661
14:39:31.104	1.045688349	1.127790395	0.916273235	0.916116094	0.908111548	0.907466338	0.932479398	0.93147433	0.934886978	0.937490445	0.933671235	0.929869281	0.933797868	0.932272924	0.930742716	0.939710066	0.927516567	0.950969361
14:39:31.968	1.047490087	1.123207403	0.916292007	0.916183299	0.908114034	0.907477308	0.932565272	0.931603387	0.935056195	0.937686175	0.933993693	0.930093242	0.934184634	0.932633207	0.931121864	0.939600706	0.927605398	0.950987591
14:39:32.832	1.05021784	1.130481718	0.916331477	0.916203244	0.908218617	0.907569287	0.932680275	0.931809239	0.935288468	0.938012337	0.93447103	0.930669452	0.934874677	0.933244783	0.931910116	0.940244591	0.928257433	0.951667588
14:39:33.696	1.046250331	1.124742929	0.91643075	0.916166319	0.908284429	0.907754025	0.932890426	0.931948901	0.935453547	0.938267936	0.934797856	0.930977561	0.935248051	0.933596362	0.932269551	0.940486907	0.928407466	0.951745058
14:39:35.424	1.047522952	1.132312901	0.916552591	0.916286788	0.908389448	0.907687961	0.932971948	0.93213018	0.935646673	0.938531243	0.935154475	0.931429713	0.935490253	0.933989434	0.932540256	0.940662801	0.928488027	0.951805259
14:39:36.288	1.046229185	1.138641876	0.91663733	0.916271004	0.908439095	0.907762959	0.933192393	0.932372669	0.935907915	0.938862326	0.935524756	0.932163817	0.936106561	0.934687599	0.933321355	0.941530275	0.929253635	0.95264006
14:39:37.152	1.048294628	1.133261737	0.916409045	0.916249644	0.908548175	0.907872113	0.93331426	0.932534765	0.936135263	0.939134944	0.936018721	0.932674283	0.936593698	0.935145747	0.933706815	0.941812637	0.929526027	0.952877638
14:39:38.016	1.044638205	1.14213875	0.916645399	0.916303264	0.908537861	0.907928911	0.933494904	0.932754637	0.936433459	0.939549227	0.936405169	0.933377691	0.937316121	0.935832485	0.934581932	0.942790536	0.930350763	0.953659579
14:39:38.880	1.048542323	1.145738985	0.916512122	0.916300803	0.90869165	0.907929095	0.933671402	0.932939001	0.936642824	0.939844015	0.936953651	0.933788521	0.937825123	0.936318147	0.935125177	0.943254387	0.93075296	0.954022548
14:39:39.744	1.044873291	1.123578896	0.916369515	0.916423281	0.908691848	0.908100103	0.933741007	0.933064314	0.93676279	0.939973943	0.937152026	0.933984501	0.938010403	0.936450707	0.935075223	0.943009453	0.930491533	0.953638363
14:39:40.608	1.052125786	1.126592974	0.916791083	0.916431616	0.908774951	0.908081929	0.933880344	0.933232274	0.93695146	0.940253273	0.937447878	0.934335312	0.93834684	0.936913715	0.935563988	0.943339933	0.930796525	0.953854181
14:39:41.472	1.045401172	1.128377204	0.916552636	0.916440475	0.908765822	0.90814053	0.934044591	0.933367937	0.937128615	0.940494762	0.937728779	0.934726226	0.938736321	0.937304021	0.935958731	0.94349066	0.931068711	0.954044637
14:39:43.200	1.048049698	1.131250735	0.916854667	0.916503169	0.908856984	0.908124817	0.934217424	0.933602342	0.937360965	0.940833533	0.938216525	0.935281954	0.939251226	0.937877083	0.936652789	0.944004555	0.931751954	0.954755065
14:39:44.064	1.049313901	1.140755996	0.916727787	0.916461952	0.908895665	0.908245059	0.934365809	0.933727076	0.937548852	0.941055256	0.938586585	0.935628616	0.939664275	0.938270349	0.937051617	0.94430283	0.931968912	0.954864567
14:39:44.928	1.042185504	1.126549467	0.916904879	0.916507931	0.909005041	0.908321659	0.934440965	0.933866999	0.937737317	0.941311909	0.938842332	0.935953475	0.94016877	0.938680783	0.937618957	0.944705095	0.932356519	0.955213723
14:39:45.792	1.049029454	1.120153407	0.916729712	0.916505973	0.909037989	0.908394586	0.934591143	0.934014001	0.937926273	0.941568645	0.939187618	0.936349354	0.940644095	0.93911088	0.938047394	0.94506778	0.932677263	0.955477394
14:39:46.656	1.041431464	1.134172619	0.916831864	0.916485806	0.909052853	0.908394927	0.93463494	0.934146704	0.938024865	0.941716174	0.939265315	0.936393282	0.940776058	0.939238193	0.937966426	0.944682955	0.932295079	0.954986143
14:39:47.520	1.044690506	1.139820023	0.916801392	0.916556059	0.909127931	0.908462228	0.934845188	0.934317554	0.938279545	0.942004249	0.939648091	0.937021839	0.941340588	0.939752909	0.938517269	0.945185939	0.932727275	0.95539513
14:39:48.384	1.047444866	1.15048426	0.916768406	0.916679887	0.909134071	0.908536782	0.934931226	0.934457204	0.938445128	0.942268556	0.939932833	0.937346201	0.941753667	0.940164534	0.938957109	0.945470052	0.932911181	0.955473187
14:39:50.112	1.037323059	1.143348987	0.916626147	0.916601012	0.909218327	0.908543446	0.935044239	0.93460296	0.938631577	0.942484625	0.940290401	0.937612529	0.942154767	0.940514021	0.939203172	0.945649277	0.933000469	0.955455709
14:39:50.976	1.046768581	1.135923287	0.916865079	0.916590625	0.90931757	0.908675214	0.93526335	0.934852915	0.938893197	0.942881638	0.940934077	0.938195521	0.94281147	0.941218184	0.940082886	0.946536608	0.933748483	0.956255135
14:39:51.840	1.0421923	1.135389209	0.916830077	0.916688319	0.909360143	0.908709064	0.935398271	0.935077194	0.939128107	0.943213618	0.941336486	0.938724622	0.943401843	0.941720593	0.940596788	0.946988478	0.934206137	0.956750018
14:39:52.704	1.049253603	1.130779674	0.916843546	0.916664227	0.909468	0.908801291	0.935511718	0.93522282	0.939298861	0.943415404	0.941664672	0.939100865	0.943790384	0.942129697	0.940897744	0.947090704	0.934307519	0.956816561
14:39:53.568	1.054667561	1.136633005	0.916999654	0.916677633	0.909487112	0.908924859	0.935736414	0.935459804	0.939573177	0.943792382	0.942238592	0.939676539	0.944441226	0.942778965	0.941711368	0.947780135	0.934989632	0.957596387
14:39:54.432	1.049517725	1.129278386	0.916946952	0.91669036	0.909528202	0.908847315	0.935809972	0.935511425	0.939682435	0.943959367	0.94246732	0.939815858	0.944614483	0.9430177	0.941834914	0.947644006	0.934826857	0.957332164
14:39:55.296	1.043773867	1.129448463	0.91710517	0.916811978	0.909555298	0.908830009	0.935963731	0.935683538	0.939878828	0.944219819	0.942885428	0.940276731	0.944986946	0.943496245	0.942396772	0.948186713	0.93521682	0.957694934
14:39:56.160	1.051395892	1.132735363	0.917039754	0.916781744	0.909623965	0.908942315	0.93609578	0.935791239	0.940029783	0.944385839	0.943108592	0.940566848	0.945250927	0.943760223	0.942589664	0.948149838	0.935121943	0.95760077
14:39:57.888	1.045774509	1.137638674	0.91708735	0.916809018	0.909612263	0.909016743	0.936165225	0.93589259	0.940116621	0.944519608	0.943258227	0.940802302	0.945401517	0.943907001	0.94273106	0.948080218	0.93496564	0.957388585
14:39:58.752	1.055528866	1.123705854	0.91704574	0.916868482	0.909713544	0.909058973	0.936247048	0.936074024	0.940331602	0.944813654	0.94362735	0.94134225	0.945911299	0.944430042	0.9433211	0.948618817	0.935460049	0.957812796
14:39:59.616	1.053182997	1.125785337	0.917086673	0.916891285	0.909774012	0.909149625	0.936401482	0.936235625	0.940539148	0.945083179	0.94388921	0.94176728	0.946451842	0.944913241	0.943775832	0.949089554	0.93586013	0.958213313
14:40:00.480	1.048576836	1.137259864	0.91719752	0.916834508	0.909780977	0.909068135	0.936470728	0.936315588	0.940634843	0.945209829	0.9439888	0.941952973	0.946457415	0.944974949	0.94373568	0.94871085	0.935465631	0.957644949
14:41:15.648	1.037166971	1.179617451	0.918068282	0.917153622	0.912306216	0.911576968	0.943643671	0.94458797	0.950456229	0.95846333	0.961656965	0.962389832	0.968201263	0.967189342	0.965964294	0.964075738	0.949090652	0.969167655
14:41:16.512	1.050828912	1.129976543	0.917764662	0.917321844	0.912223211	0.911577915	0.943385464	0.944595905	0.950495771	0.9586359	0.962389696	0.962340719	0.968384502	0.967213369	0.966039961	0.964104672	0.949156362	0.969301162
14:41:18.240	1.047449715	1.149244054	0.918090406	0.917570119	0.912355026	0.911629843	0.943572965	0.944746745	0.950670134	0.958854704	0.962681315	0.962562029	0.968682731	0.967490374	0.966343043	0.964429439	0.949499079	0.969616204
14:41:19.104	1.045497635	1.142207337	0.918062769	0.917393305	0.912379075	0.911571931	0.943433179	0.944716578	0.95062688	0.958748573	0.962588818	0.962461997	0.968560541	0.967354974	0.966139451	0.964114431	0.94922285	0.96924898
14:41:19.968	1.045650738	1.129932015	0.917950157	0.917341585	0.912382568	0.911654198	0.94355203	0.944662883	0.950572033	0.958696917	0.96236393	0.962183479	0.96846109	0.967201607	0.96587108	0.963557091	0.948896954	0.968709925
14:41:20.832	1.05022832	1.135441688	0.917844117	0.917401195	0.912369666	0.911611505	0.943522157	0.94472222	0.950621826	0.958801215	0.962542451	0.962399154	0.968700393	0.967357193	0.96605925	0.963869127	0.949187338	0.96898254
14:41:21.696	1.044184127	1.132767166	0.917831028	0.917490926	0.912395353	0.911723149	0.94367373	0.944931256	0.950822644	0.959059918	0.962918087	0.962921365	0.969324979	0.967868282	0.966751783	0.964607367	0.950002963	0.96987551
14:41:22.560	1.050947715	1.148451469	0.918207021	0.91744082	0.912407568	0.911704092	0.943710962	0.944948083	0.950881964	0.959092189	0.962902876	0.96307063	0.96951608	0.967970679	0.966823261	0.964635584	0.950095904	0.969910564
14:41:23.424	1.053231288	1.160467333	0.918106144	0.917450908	0.912401641	0.911655708	0.9437721	0.944983214	0.950915578	0.959148803	0.962949174	0.963092391	0.969453846	0.967993657	0.966807816	0.964453339	0.949922797	0.969640498
14:41:24.288	1.049168353	1.127942882	0.918059287	0.917331592	0.912411689	0.911732059	0.943762386	0.945032598	0.950989659	0.959265773	0.963136537	0.963284872	0.969705918	0.968193922	0.966973515	0.964440925	0.950111996	0.969780966
14:41:26.016	1.043667965	1.149333763	0.918034064	0.91744787	0.91243861	0.911713043	0.943799338	0.94507653	0.951046471	0.959370516	0.963203105	0.963404713	0.96977022	0.968281473	0.967094561	0.964461108	0.950157374	0.969746346
14:41:26.880	1.045781171	1.140598723	0.918329124	0.917510015	0.912510338	0.911712699	0.943887743	0.945171671	0.951165023	0.959530134	0.963519331	0.963592371	0.969956968	0.968606366	0.967518078	0.964931053	0.950578941	0.970121515
14:41:27.744	1.045768944	1.134775093	0.918061573	0.917476148	0.912486474	0.911713348	0.943954233	0.945202992	0.951214707	0.959548937	0.96360771	0.963693321	0.970046353	0.968662312	0.967447195	0.96472347	0.950396975	0.969921327
14:41:28.608	1.044591294	1.131936244	0.917940152	0.917439305	0.912474989	0.911742041	0.943951994	0.945198388	0.951183313	0.95952355	0.963549419	0.963602353	0.969913845	0.96855219	0.967238178	0.964298145	0.950042024	0.96948896
14:41:29.472	1.049508686	1.124759152	0.918103393	0.917402605	0.912511508	0.911834376	0.94409103	0.945251842	0.951261123	0.959635094	0.963724941	0.963806604	0.97014808	0.968780143	0.967430431	0.964688009	0.950321479	0.969799993
14:41:30.336	1.05138849	1.130634202	0.918036924	0.917359402	0.912509203	0.911911573	0.944061128	0.945322438	0.951369916	0.959774872	0.963925745	0.964048748	0.970562111	0.969009704	0.967763781	0.965028902	0.950689981	0.970111055
14:41:31.200	1.050763871	1.136967388	0.917910534	0.917342846	0.912510823	0.911761735	0.944090406	0.945360056	0.951407342	0.959806071	0.963860908	0.964139222	0.970537697	0.969050063	0.967828281	0.9650114	0.950683414	0.969979281
14:41:32.064	1.055012454	1.133652999	0.917893651	0.917350322	0.912492658	0.911759937	0.943959102	0.94522012	0.95125974	0.959636158	0.963606024	0.963762837	0.970157151	0.968604837	0.967175835	0.963979222	0.949778073	0.969022413
14:41:33.792	1.046812762	1.12437572	0.918005153	0.917363716	0.912513309	0.911782013	0.943966147	0.945143273	0.951165587	0.959496518	0.963441316	0.963582618	0.969880543	0.968382724	0.96677726	0.963541285	0.949316338	0.968494378
14:41:34.656	1.04888767	1.129585684	0.918041902	0.917365961	0.912468107	0.91171571	0.944060794	0.945248294	0.951275599	0.95969018	0.963719197	0.963924873	0.9702837	0.968692904	0.967219762	0.964026749	0.949770185	0.968901895
14:41:35.520	1.054729997	1.136196914	0.917958635	0.917397275	0.912530486	0.911794017	0.944034228	0.94522224	0.951265042	0.959666276	0.963693835	0.963960661	0.97031316	0.968734011	0.967200658	0.963973304	0.949728491	0.968842831
14:41:36.384	1.058008822	1.128986982	0.917975637	0.917306315	0.912451601	0.911774688	0.943985479	0.945178765	0.951219026	0.959585881	0.963583774	0.963750646	0.970185344	0.968595382	0.96703318	0.963688985	0.949487139	0.968574318
14:41:37.248	1.055774731	1.151872201	0.917988086	0.917298923	0.912563089	0.91174498	0.944060135	0.945340569	0.951410528	0.959860701	0.96398308	0.964372328	0.970761755	0.969108232	0.967799682	0.964711507	0.950416369	0.969594964
14:41:38.112	1.053560528	1.130783527	0.917952142	0.917325997	0.912566023	0.911831556	0.944231721	0.945406216	0.951506148	0.959973229	0.964139777	0.964758253	0.97090607	0.969396821	0.968163686	0.96520431	0.95085446	0.970111828
14:41:38.976	1.045378031	1.11404534	0.917996917	0.917303008	0.912489502	0.911838394	0.944219152	0.945422974	0.951487728	0.959903817	0.96394248	0.964512912	0.970689458	0.969216049	0.967893463	0.964769787	0.950462236	0.969617604
14:41:40.704	1.049504667	1.128112669	0.91806363	0.917276175	0.912547942	0.911827892	0.944127002	0.945423702	0.951472868	0.959897456	0.963926855	0.964425549	0.970708822	0.969269834	0.96789694	0.964804157	0.950492801	0.969644559
14:41:41.568	1.046085062	1.13577787	0.918074041	0.917223715	0.912592984	0.911848172	0.944277266	0.945479716	0.951569386	0.960062917	0.964328848	0.964642312	0.970924738	0.969568368	0.968235195	0.965411171	0.950970347	0.970245835
14:41:42.432	1.048824434	1.120199285	0.917949079	0.917275005	0.91258782	0.911869337	0.94420991	0.945446917	0.951503499	0.959956034	0.964167069	0.964502115	0.970726803	0.969371242	0.967944728	0.964918706	0.950495948	0.969677697
14:41:43.296	1.049543922	1.134300956	0.917919699	0.917358185	0.912520936	0.911743839	0.944274323	0.945502102	0.951574331	0.960053607	0.964249882	0.964571923	0.970890852	0.969528549	0.968106607	0.965210104	0.950731228	0.96995237
14:41:44.160	1.05005982	1.128607755	0.918074689	0.917278944	0.912556419	0.911830716	0.944307018	0.945597997	0.951679609	0.960192959	0.96443909	0.964938768	0.971214212	0.969801854	0.968359664	0.965585243	0.951104577	0.970346228
14:41:45.024	1.049835266	1.136109743	0.917912194	0.917300836	0.912550151	0.911820672	0.944208299	0.94544688	0.951499508	0.959966888	0.964101087	0.964384627	0.97062894	0.969245397	0.967585556	0.964309838	0.949871446	0.968935067
14:41:45.888	1.045139524	1.122275462	0.918008466	0.917220684	0.912615912	0.911805755	0.944324853	0.945498378	0.951552873	0.960025861	0.964127273	0.964509532	0.970812711	0.969374813	0.967726766	0.964421467	0.949996468	0.969073813
14:41:46.752	1.044521795	1.127162394	0.917735446	0.917285964	0.912685557	0.911857694	0.944532779	0.945783322	0.951888471	0.960486192	0.964790709	0.965409659	0.971758289	0.970319761	0.968984912	0.965896021	0.951559489	0.970699912
14:41:48.480	1.042902769	1.142080343	0.917901446	0.917170269	0.912534094	0.911830949	0.944423485	0.945738942	0.951794335	0.960360296	0.964525777	0.965090339	0.97133075	0.970038723	0.96854821	0.965332805	0.950990123	0.970039779
14:41:49.344	1.04155077	1.144082035	0.917826442	0.917268451	0.912641112	0.911751541	0.944469412	0.945734326	0.951858922	0.96043381	0.964599035	0.96523212	0.971590014	0.970175867	0.968693785	0.965389172	0.951111955	0.97008921
14:41:50.208	1.044672056	1.151775472	0.917656532	0.91719733	0.912572015	0.911691993	0.944495361	0.945748894	0.951821113	0.960399347	0.964526177	0.965123286	0.971511528	0.970109718	0.968576635	0.965107448	0.95092524	0.96984364
14:41:51.072	1.041258998	1.131538845	0.917628989	0.917154744	0.912638107	0.911832505	0.944516629	0.945798535	0.951901372	0.960508164	0.964804262	0.965186784	0.971615206	0.970257515	0.968759656	0.965300547	0.951032155	0.969900233
14:41:51.936	1.044690267	1.138642318	0.917727453	0.917087864	0.91265509	0.91202081	0.944637815	0.945855412	0.951951367	0.960594915	0.964994343	0.965269003	0.971708059	0.970425166	0.968943443	0.965417325	0.951248667	0.970170005
14:41:52.800	1.0430454	1.141672883	0.917881333	0.917135843	0.912655764	0.911898096	0.944656577	0.945948944	0.952122889	0.9608201	0.965378732	0.965641918	0.97203013	0.970867245	0.969456278	0.966075233	0.951896955	0.970946949
14:41:53.664	1.043170611	1.1450841	0.917880701	0.91725815	0.912674256	0.911948153	0.944781169	0.945983718	0.95216335	0.960894586	0.965486853	0.965850723	0.972299304	0.971024407	0.969636659	0.966301137	0.952030354	0.971122058
14:41:54.528	1.044341584	1.145276254	0.917915757	0.917094056	0.912708259	0.911824663	0.94465854	0.945884943	0.952027853	0.960645077	0.9651813	0.965417032	0.971900376	0.970535192	0.968908014	0.965165308	0.951053506	0.96989039
14:41:56.256	1.045548854	1.12179937	0.917876129	0.917058452	0.912704268	0.911885241	0.944797226	0.946012134	0.952166443	0.960877429	0.965394867	0.96577067	0.972177738	0.970929855	0.969434611	0.965966246	0.95182525	0.970731915
14:41:57.120	1.043028704	1.132023757	0.917759815	0.917100231	0.912689306	0.911890809	0.944728958	0.945999649	0.952188772	0.960877973	0.965419061	0.9658454	0.972243741	0.970963938	0.969436185	0.965887762	0.951788609	0.97065443
14:41:57.984	1.055275647	1.142130911	0.917617425	0.917199471	0.912622769	0.911816029	0.944699016	0.945956002	0.952116998	0.960799834	0.965248237	0.965572522	0.972057253	0.970744206	0.969083242	0.965439187	0.951352535	0.970094454
14:41:58.848	1.050339736	1.126773279	0.917849375	0.917227313	0.91271219	0.91184361	0.944876257	0.946025089	0.9522169	0.960892584	0.965460186	0.965846571	0.972254631	0.970963542	0.969344026	0.965777279	0.951672505	0.970442485
14:41:59.712	1.053304942	1.136403726	0.917797294	0.917169732	0.912649454	0.911813505	0.944726508	0.945992162	0.952161086	0.960837012	0.965261414	0.965693819	0.972096784	0.970864254	0.9692217	0.965520551	0.951439365	0.970146229
14:43:15.744	1.019329575	1.114361333	0.917238973	0.917002653	0.915075775	0.91401875	0.951855923	0.954179878	0.961798253	0.973417151	0.981328199	0.983276432	0.991262828	0.989638965	0.987405561	0.977705092	0.964067605	0.978913776
14:43:16.608	1.046066356	1.126582595	0.917929779	0.917161301	0.915114523	0.91432233	0.951853395	0.954419545	0.962033057	0.973718065	0.981781757	0.983842349	0.991571978	0.990289703	0.988000444	0.97817583	0.964665551	0.979557391
14:43:17.472	1.046541384	1.146385182	0.917923069	0.917251421	0.915269033	0.914466736	0.952099314	0.954703781	0.962345278	0.974095246	0.982260332	0.984229266	0.991977903	0.990691534	0.988308698	0.978200361	0.964819948	0.979532797
14:43:18.336	1.050183929	1.112443153	0.918018089	0.917268472	0.91537023	0.914506581	0.952218333	0.954845419	0.962544191	0.974364151	0.982737003	0.984749774	0.99239187	0.9911323	0.988844492	0.978631339	0.965308498	0.97996445
14:43:19.200	1.048112974	1.118907759	0.917855838	0.917262436	0.915395681	0.914506792	0.952372193	0.954969827	0.962631961	0.974480461	0.982851378	0.984965641	0.992601406	0.991258744	0.988899488	0.978505631	0.965182925	0.979746562
14:43:20.928	1.046981853	1.143162531	0.9179701	0.917252464	0.91540748	0.914552861	0.952535912	0.955228447	0.962905172	0.974867081	0.98336508	0.985439032	0.993156808	0.991903618	0.989572445	0.979211865	0.96585532	0.980397518
14:43:21.792	1.040058632	1.119313584	0.918044645	0.917238827	0.915495887	0.914602448	0.952710407	0.95538993	0.963124358	0.975157033	0.983718357	0.985972545	0.993582787	0.99230619	0.989957645	0.979513405	0.966120555	0.980621677
14:43:22.656	1.052782168	1.131012916	0.918179372	0.917314804	0.915490168	0.914705443	0.952815843	0.955463816	0.963172197	0.975207164	0.983667129	0.985923268	0.993530208	0.992270349	0.989719623	0.978988927	0.96562667	0.979916663
14:43:23.520	1.041026252	1.123047334	0.918113439	0.917435247	0.915612245	0.91481731	0.953001657	0.95566533	0.963503229	0.975614949	0.984177196	0.986508826	0.994213432	0.992976691	0.990631695	0.979883674	0.966513259	0.980869257
14:43:24.384	1.045622826	1.123106605	0.917918421	0.917357024	0.915624137	0.914767069	0.953059501	0.9558052	0.963598785	0.975723655	0.984386575	0.986693605	0.994409897	0.993099589	0.990702748	0.979713107	0.966403687	0.980637483
14:43:25.248	1.047751927	1.133207391	0.918087077	0.917356497	0.915688669	0.914835444	0.953197028	0.955982786	0.963823567	0.976042816	0.984756279	0.987275525	0.994923542	0.993518412	0.991214106	0.980116749	0.966870488	0.981075917
14:43:26.112	1.042513416	1.12185086	0.917968451	0.91743077	0.915695814	0.914912199	0.953254006	0.956154099	0.964031866	0.976299453	0.985051274	0.987524156	0.995270086	0.993867135	0.991494376	0.980284999	0.966986268	0.981082978
14:43:26.976	1.041244783	1.135525924	0.917951513	0.917472017	0.915831667	0.914968228	0.953531909	0.956387416	0.964307171	0.976693567	0.985417666	0.988087211	0.995864341	0.994481929	0.992134861	0.980999524	0.967682434	0.981752873
14:43:28.704	1.044469141	1.131696405	0.918070326	0.917397014	0.915816776	0.914972046	0.953661598	0.9565519	0.964487365	0.976903541	0.98564529	0.988388091	0.996194077	0.994793016	0.992345954	0.981090847	0.967844375	0.981860407
14:43:29.568	1.042514952	1.118921054	0.91786	0.91746138	0.915945997	0.915031676	0.953913003	0.956760386	0.964762416	0.9772464	0.986151244	0.988864076	0.996819883	0.99532598	0.992884152	0.981579861	0.968284768	0.982177446
14:43:30.432	1.054765684	1.114443365	0.918187601	0.917489023	0.915999092	0.915085456	0.953939339	0.956934114	0.964940328	0.977505402	0.986348308	0.989205868	0.997234699	0.995685002	0.993204217	0.981774821	0.968508883	0.982304753
14:43:31.296	1.045990669	1.13303872	0.91812482	0.91741142	0.916007477	0.915241337	0.954084559	0.957089803	0.965125907	0.977744716	0.986755456	0.98941692	0.997559106	0.9960144	0.993585762	0.981948635	0.968671384	0.982336223
14:43:32.160	1.051228007	1.138653546	0.918082746	0.917376374	0.9160237	0.91532153	0.954239741	0.957239031	0.965312771	0.978005009	0.9870085	0.989802524	0.997907583	0.996393545	0.993941786	0.982178208	0.968960792	0.982499865
14:43:33.024	1.048316566	1.121455106	0.918295039	0.917454127	0.916130425	0.915297095	0.95436907	0.957355004	0.965425638	0.978150467	0.987280618	0.989907594	0.998049117	0.996531893	0.993975836	0.981976803	0.968805428	0.982227226
14:43:33.888	1.042225941	1.125500785	0.918024411	0.91748828	0.916213188	0.915342142	0.954545866	0.957563607	0.96566862	0.978486046	0.987684962	0.990323279	0.998563146	0.997039375	0.994584115	0.98247808	0.969334851	0.982811021
14:43:35.616	1.043992158	1.110830152	0.918020081	0.917485897	0.916240893	0.915449182	0.954734978	0.957783522	0.965938679	0.978823429	0.988190247	0.990862677	0.999033988	0.997617254	0.995079882	0.98287809	0.969888425	0.983341309
14:43:36.480	1.043825878	1.125684022	0.918112368	0.917489994	0.916273551	0.915356333	0.954769089	0.957828484	0.966028547	0.978897433	0.988299157	0.991014354	0.999191323	0.997722842	0.995096869	0.982818575	0.969719492	0.983088378
14:43:37.344	1.048878351	1.137354393	0.918240918	0.917519342	0.916328165	0.915452938	0.954934949	0.958007819	0.966222114	0.9791515	0.988612131	0.991323225	0.999573927	0.998085001	0.995522099	0.983133603	0.969995633	0.983377676
14:43:38.208	1.048338474	1.131207638	0.918003704	0.917594292	0.916348669	0.915500949	0.954962099	0.958138432	0.966407901	0.979394099	0.98885414	0.991773931	0.999843275	0.998457692	0.99593131	0.983445458	0.97034519	0.983651104
14:43:39.072	1.038555018	1.127803469	0.918161553	0.917629172	0.916340524	0.915571286	0.955100642	0.958277317	0.966560273	0.979583168	0.98925705	0.991950575	1.000094087	0.998689194	0.996127983	0.983458335	0.970335199	0.983575912
14:43:39.936	1.043376892	1.130445684	0.918267263	0.917478008	0.916440357	0.915586026	0.955214729	0.958401395	0.966693931	0.979765715	0.989596319	0.992176774	1.000373069	0.998959662	0.996385476	0.983571649	0.970429602	0.983611402
14:43:40.800	1.04078714	1.122357704	0.918187446	0.917490217	0.916454175	0.915540915	0.955306681	0.958493358	0.966798964	0.979911882	0.989645699	0.992269407	1.000515745	0.999164274	0.996570217	0.983654275	0.970474579	0.983620207
14:43:41.664	1.037800966	1.12687443	0.918019033	0.917471157	0.916476931	0.91562389	0.955353906	0.958619085	0.966919916	0.980086906	0.989833607	0.992472313	1.000777937	0.999407753	0.996809836	0.983780589	0.97054139	0.983655541
14:43:43.392	1.044984486	1.149639729	0.917937841	0.917439871	0.916516436	0.915593904	0.95550252	0.958755723	0.967089629	0.980290064	0.990031124	0.992748879	1.001023822	0.999696922	0.997023196	0.983850838	0.970584169	0.983597925
14:43:44.256	1.042713581	1.130851782	0.917936514	0.917539593	0.916492354	0.915711847	0.955634852	0.958949982	0.967322515	0.980594295	0.990412212	0.993242301	1.001534896	1.000189506	0.997577882	0.98441583	0.971086028	0.984087305
14:43:45.120	1.044387229	1.130881229	0.918122551	0.917470853	0.916675912	0.915845111	0.955772031	0.959117157	0.967557799	0.98091771	0.99080525	0.993761449	1.002055095	1.000736823	0.998116481	0.984948953	0.971613719	0.984676816
14:43:45.984	1.036204932	1.114277867	0.917981143	0.917474138	0.916655184	0.915703883	0.955873729	0.959221859	0.967730411	0.981136518	0.990978916	0.994098209	1.002343	1.001011361	0.998420956	0.985135349	0.971746683	0.984823339
14:43:46.848	1.040663107	1.125814746	0.918045103	0.917451129	0.916706191	0.915907034	0.956009248	0.95947344	0.96803647	0.981514841	0.991676839	0.99463779	1.002940936	1.001684796	0.999113734	0.985912478	0.972550727	0.985676497
14:43:47.712	1.045381037	1.128890127	0.918089218	0.917497267	0.916750356	0.915924845	0.956183121	0.959564552	0.968130094	0.981598587	0.991768958	0.994755268	1.003010573	1.001795864	0.999101671	0.985689837	0.972363137	0.9854063
14:43:48.576	1.03877418	1.124251517	0.918072172	0.917454021	0.9168716	0.915960246	0.956229191	0.959697929	0.968230052	0.981775936	0.991971037	0.995009974	1.003267258	1.002034582	0.99935218	0.98569773	0.97241211	0.985456989
14:43:49.440	1.045301282	1.117863449	0.91804314	0.917412094	0.91679657	0.916003122	0.956413236	0.959870053	0.968457735	0.982082643	0.992431225	0.995444203	1.003761374	1.002513641	0.99995276	0.986212172	0.97296719	0.986009351
14:43:51.168	1.041464847	1.132995476	0.918097553	0.917424442	0.916838987	0.915930839	0.956517172	0.959989349	0.968597176	0.982294662	0.992697062	0.995742323	1.00409509	1.002814427	1.000203661	0.986432799	0.973189819	0.986127768
14:43:52.032	1.05215432	1.119414023	0.918103693	0.917499317	0.916870756	0.915988342	0.956590105	0.960097014	0.968767887	0.982480436	0.992902755	0.996089857	1.004345618	1.003142861	1.000510957	0.986710372	0.973450083	0.986311447
14:43:52.896	1.036977101	1.122580591	0.917959647	0.917556714	0.916990689	0.91611871	0.95679824	0.960246743	0.968938903	0.982694204	0.993138483	0.996429227	1.004666259	1.003419962	1.000707732	0.986777642	0.973567988	0.986334741
14:43:53.760	1.043814664	1.128120974	0.918131178	0.917469447	0.916992338	0.916080049	0.956832216	0.9603849	0.969057372	0.982853493	0.993368445	0.996731066	1.004830841	1.003611402	1.000801258	0.986827936	0.973586054	0.98627693
14:43:54.624	1.049185481	1.126740855	0.918128162	0.917492678	0.916972474	0.916121817	0.956886946	0.96041026	0.969106362	0.982942497	0.993444782	0.996783821	1.004873056	1.003660679	1.000796371	0.986635359	0.973405045	0.986001444
14:43:55.488	1.037938112	1.127629341	0.917850778	0.917438736	0.917033068	0.916197093	0.957001817	0.96056198	0.969238397	0.983108009	0.993699962	0.997061188	1.005275741	1.00399109	1.001240935	0.986976167	0.973704232	0.986266302
14:43:56.352	1.053888128	1.116464747	0.918015429	0.917405392	0.917054731	0.916159431	0.957032983	0.96059496	0.969319082	0.983201157	0.993845083	0.997108623	1.00528008	1.004090748	1.001231509	0.986838001	0.973507987	0.986011152
14:43:58.080	1.04887024	1.129575438	0.917938849	0.917415032	0.917031823	0.916180099	0.957163798	0.960772671	0.969532203	0.983453422	0.994160885	0.997580366	1.005715767	1.004538807	1.001749363	0.987267107	0.97400804	0.986523056
14:43:58.944	1.045784533	1.144956131	0.918013869	0.91747279	0.917080289	0.916231992	0.957257666	0.960871143	0.969645574	0.983605317	0.994302955	0.997711437	1.005939049	1.004773469	1.001909463	0.987307508	0.974019797	0.986470184
14:43:59.808	1.044253317	1.133265569	0.918183785	0.917295828	0.917126156	0.916175144	0.957335366	0.960961523	0.969819799	0.983814981	0.994551535	0.997965901	1.006323256	1.005111295	1.002265717	0.987702721	0.974288748	0.986773317
14:45:14.976	1.063277214	1.110616545	0.916046612	0.91581512	0.917662577	0.916413319	0.961042642	0.964866809	0.974181452	0.989409395	1.00143506	1.005999067	1.015474363	1.013979644	1.010369465	0.992089341	0.978109434	0.989873888
14:45:16.704	1.036948969	1.109073431	0.916178809	0.915787572	0.91750331	0.916655159	0.960767327	0.964878409	0.974143049	0.989471626	1.002052625	1.006008766	1.01547473	1.014027067	1.010481155	0.992591768	0.978442901	0.990273529
14:45:17.568	1.035748358	1.121981305	0.916277945	0.915779128	0.917531862	0.916575881	0.960766936	0.964780478	0.973975331	0.989213536	1.001522506	1.00547471	1.014955577	1.013479168	1.009754258	0.991711595	0.977642204	0.989395833
14:45:18.432	1.031612251	1.119134313	0.916304487	0.915747823	0.917432799	0.91649128	0.960635143	0.96463435	0.973792479	0.989017973	1.001336711	1.005299641	1.014649165	1.013226963	1.009485193	0.991433805	0.977360248	0.989129235
14:45:19.296	1.040747273	1.121875563	0.916308273	0.915757612	0.917401487	0.916558211	0.96058931	0.964576618	0.973708899	0.988884991	1.001204117	1.005100874	1.014484891	1.013087643	1.00938028	0.99145993	0.977357009	0.989165105
14:45:20.160	1.034030688	1.137309812	0.91621619	0.915622379	0.917245239	0.916396987	0.960331222	0.96428686	0.973398961	0.988494839	1.000606928	1.004419611	1.013842339	1.012422601	1.008609696	0.990512616	0.976385582	0.988172834
14:45:21.024	1.036802161	1.124936883	0.916210013	0.915609615	0.917267301	0.916256036	0.960311852	0.964250241	0.973350916	0.988451021	1.000682087	1.004482752	1.013861073	1.012451243	1.008729738	0.990788004	0.976728545	0.988581732
14:45:21.888	1.04778613	1.130864566	0.916310522	0.915594946	0.917228303	0.91640852	0.960260868	0.964216735	0.973296461	0.988386509	1.000694907	1.004505421	1.013856311	1.012445203	1.008791717	0.991062085	0.977003837	0.988844102
14:45:22.752	1.036268413	1.122033732	0.91612128	0.915597312	0.917169704	0.916352068	0.960201558	0.964134301	0.97324138	0.988244318	1.000577295	1.004396022	1.013895541	1.012362523	1.00874962	0.991182242	0.977151314	0.988950791
14:45:24.480	1.035760613	1.135005166	0.916108256	0.915494046	0.917159872	0.916266509	0.960064649	0.963978937	0.973021043	0.988022309	1.000261706	1.004028048	1.013460224	1.011995112	1.008363192	0.990779021	0.976807371	0.988594645
14:45:25.344	1.036461337	1.115206489	0.915868492	0.915446281	0.917015803	0.916090859	0.959922975	0.963878741	0.972877477	0.987847645	1.000126002	1.003883129	1.013184541	1.011750345	1.008086898	0.990534808	0.976609631	0.988314724
14:45:26.208	1.038663531	1.116930041	0.915875243	0.91533767	0.91701693	0.916077138	0.959862044	0.9636903	0.972712124	0.98762619	0.999771727	1.003458302	1.012844551	1.011408546	1.007690812	0.990144354	0.976325586	0.988023215
14:45:27.072	1.043083514	1.124061852	0.915757002	0.915327804	0.917009608	0.916014568	0.959808262	0.963703855	0.972687874	0.987574914	0.999815507	1.003573413	1.01295394	1.011462411	1.007845267	0.990435942	0.976665176	0.988309429
14:45:27.936	1.045260565	1.122580997	0.915673958	0.915202254	0.916889258	0.916013098	0.959766177	0.963567817	0.972566848	0.987432298	0.999598409	1.0033461	1.01267644	1.011245568	1.0076271	0.990226048	0.976501034	0.988134648
14:45:28.800	1.042121463	1.118187065	0.91587032	0.915201079	0.916874492	0.915961601	0.959674494	0.963470103	0.972483143	0.987321973	0.999573485	1.003236863	1.012628617	1.011173776	1.007628493	0.990295021	0.976619802	0.988279627
14:45:29.664	1.039145956	1.118253026	0.915606263	0.915233235	0.916850417	0.91593843	0.959682519	0.963365186	0.972344053	0.98716055	0.999372786	1.00300185	1.012403507	1.010943483	1.007334444	0.990020408	0.976415027	0.98799866
14:45:31.392	1.040385917	1.132694513	0.915905162	0.915107532	0.916876847	0.91592106	0.959593064	0.963386119	0.972330467	0.987173932	0.999454275	1.003143744	1.0124059	1.011036698	1.007548884	0.990409331	0.976826592	0.988446035
14:45:32.256	1.040893861	1.124095619	0.915745407	0.915016361	0.916805541	0.915878066	0.959603653	0.963330481	0.972260075	0.987066878	0.999254985	1.002964914	1.012295759	1.010935363	1.007433843	0.990216672	0.976765972	0.988362052
14:45:33.120	1.038197866	1.111996175	0.915693233	0.914960973	0.916698398	0.915790776	0.959515128	0.963224548	0.972127904	0.986908082	0.999095101	1.002751564	1.012014964	1.010673935	1.007140825	0.989978089	0.976579943	0.988099168
14:45:33.984	1.037877718	1.125788366	0.91563788	0.914995158	0.916682288	0.915834184	0.959425465	0.963162495	0.972080874	0.986843255	0.998964665	1.002648724	1.011959064	1.01061911	1.007043964	0.989892129	0.976593589	0.988047138
14:45:34.848	1.036766407	1.131189616	0.915502111	0.914911771	0.916692459	0.915776862	0.959379629	0.963125669	0.972001889	0.986722553	0.998915064	1.002545029	1.011798248	1.010501858	1.006917156	0.989736171	0.976508427	0.987931196
14:45:35.712	1.034902259	1.124579255	0.915622981	0.914858118	0.916649679	0.915676845	0.959457301	0.96319989	0.972094368	0.986886067	0.999140303	1.002881156	1.012112625	1.010826023	1.007435395	0.99041812	0.97728751	0.988768173
14:45:36.576	1.036299387	1.11255445	0.915474123	0.914864471	0.916608051	0.915792266	0.959435539	0.963114791	0.972015237	0.9867625	0.998971182	1.002692149	1.011958728	1.01067079	1.007239586	0.990193027	0.977103228	0.988534487
14:45:37.440	1.042024244	1.127199269	0.915686489	0.914868172	0.916528227	0.915644712	0.959348358	0.96302863	0.971901621	0.986621937	0.998754512	1.002472004	1.011792406	1.010459683	1.00698001	0.989955252	0.976865365	0.988239643
14:45:39.168	1.036683161	1.11288425	0.915346626	0.914680721	0.91651413	0.915532313	0.959149062	0.962859681	0.971641372	0.986316471	0.998347728	1.001990538	1.011219517	1.009860781	1.006324842	0.98923096	0.976131664	0.987407301
14:45:40.032	1.032518859	1.116173558	0.915405157	0.914688702	0.916465055	0.915556571	0.959202803	0.962876513	0.971722153	0.986438186	0.998580221	1.002253936	1.011555941	1.010157675	1.006695543	0.989755977	0.97678971	0.988159764
14:45:40.896	1.035440639	1.113808084	0.915276399	0.914676852	0.916380188	0.915505632	0.959219221	0.962829889	0.971674661	0.986370544	0.998456998	1.002273915	1.011586191	1.010145633	1.006708161	0.98986675	0.977010177	0.988459737
14:45:41.760	1.036607503	1.133095308	0.915364151	0.914607816	0.916376679	0.91546876	0.959083838	0.962730429	0.971534787	0.986194263	0.998281974	1.001976569	1.011333844	1.00991505	1.006486312	0.989724712	0.976813467	0.988248809
14:45:42.624	1.039453994	1.124767369	0.915109319	0.914529058	0.916306713	0.915373783	0.958946176	0.96254301	0.971321423	0.985938277	0.997944837	1.001648597	1.010861964	1.009497392	1.006016137	0.989243427	0.97637483	0.987813228
14:45:43.488	1.035125078	1.115249048	0.915291474	0.914499876	0.916276522	0.915343189	0.958960127	0.962476265	0.971247529	0.985841163	0.99785071	1.001499067	1.010749727	1.009399635	1.005929389	0.989230481	0.976421744	0.987908292
14:45:44.352	1.041955522	1.127821206	0.915179415	0.91436449	0.916130844	0.915379794	0.958754136	0.962287065	0.971000896	0.985533445	0.997402211	1.001038353	1.010291263	1.008934867	1.005416285	0.988726344	0.975917958	0.987320389
14:45:45.216	1.0396415	1.129933858	0.915237353	0.914388018	0.916129885	0.91526176	0.958582871	0.962148436	0.970788835	0.985276851	0.997108408	1.000630907	1.009923528	1.008517222	1.004991704	0.98827543	0.975467298	0.986873419
14:45:46.944	1.039274973	1.121472612	0.915168543	0.914273524	0.916046508	0.91508555	0.958451473	0.961918459	0.970531564	0.984913127	0.996684623	1.000095502	1.009382462	1.00799603	1.004432402	0.987751968	0.974934069	0.986244116
14:45:47.808	1.036514812	1.122804037	0.914837692	0.914170434	0.915883096	0.915062112	0.958280338	0.96174154	0.970317503	0.984637861	0.996317413	0.99979006	1.009055407	1.007614696	1.004085809	0.987459161	0.974715249	0.986015314
14:45:48.672	1.035759787	1.127772721	0.914768788	0.914108615	0.915782099	0.914925025	0.958145301	0.961490861	0.970045111	0.984284882	0.995957878	0.999296643	1.008493424	1.007142299	1.003456345	0.986927741	0.974220139	0.985481092
14:45:49.536	1.032626404	1.12407543	0.914721395	0.914110126	0.915807154	0.914951387	0.958123288	0.961485813	0.969993522	0.984236199	0.995944195	0.999314061	1.008585919	1.007214996	1.003796992	0.987449744	0.97480266	0.98624535
14:45:50.400	1.038701905	1.108333379	0.914776335	0.914047095	0.915698628	0.914733112	0.957934886	0.961254008	0.96971819	0.983903448	0.995570906	0.998862901	1.008088544	1.006762238	1.003250164	0.987003951	0.974473137	0.985878169
14:45:51.264	1.033669876	1.125360361	0.914762664	0.913873749	0.915544741	0.914652666	0.957675968	0.960895204	0.969352533	0.983426781	0.994899722	0.998131568	1.007365665	1.005967424	1.00233333	0.98612766	0.973605739	0.984903795
14:45:52.128	1.032745637	1.117255526	0.914586391	0.913769719	0.915531221	0.914539216	0.95756373	0.960766119	0.969214911	0.983266743	0.994765995	0.997997955	1.007232871	1.005818395	1.002278746	0.986301011	0.973874015	0.985193164
14:45:53.856	1.03302247	1.127415524	0.914477183	0.913678607	0.915409042	0.914457921	0.957304235	0.960518953	0.968894804	0.982883048	0.994249448	0.997466494	1.006691779	1.005288309	1.00173841	0.985859396	0.973512339	0.98480069
14:45:54.720	1.027531763	1.124637182	0.914209365	0.913631884	0.915223541	0.914227106	0.95708096	0.960184625	0.96854633	0.982406781	0.993598863	0.99673532	1.005956333	1.004566708	1.000865823	0.985034966	0.972668964	0.983896309
14:45:55.584	1.034144374	1.120994117	0.914446362	0.913569314	0.915129818	0.914259598	0.95692932	0.960001707	0.968317321	0.982157636	0.993352527	0.996398001	1.005635444	1.004274654	1.00066972	0.984921965	0.97260718	0.983932392
14:45:56.448	1.031608386	1.114906644	0.914333104	0.913466727	0.915036758	0.914136202	0.956747208	0.959761527	0.968046629	0.981840721	0.992948831	0.996034065	1.005253197	1.003836378	1.000229359	0.984614177	0.972405459	0.983714876
14:45:57.312	1.033242176	1.122953994	0.914153393	0.913405633	0.914964908	0.914027238	0.956589645	0.959617352	0.967820369	0.981575543	0.992788763	0.995826868	1.004996451	1.003552751	1.000048289	0.984687796	0.972435858	0.983810687
14:45:58.176	1.036197228	1.123673312	0.914081675	0.913278199	0.914818751	0.913862617	0.956491663	0.95941666	0.967609616	0.981285458	0.992383305	0.995476949	1.00460007	1.003180824	0.999682932	0.984482912	0.972275534	0.983748461
14:45:59.040	1.036362327	1.116756247	0.914135221	0.913244719	0.914877542	0.91388945	0.956405938	0.959355353	0.967537549	0.981236825	0.992342476	0.995435802	1.00470532	1.003287369	1.000039077	0.985049186	0.972889044	0.984533835
14:45:59.904	1.033713793	1.129494534	0.914004595	0.913110392	0.914655081	0.913659451	0.956122237	0.958995944	0.96713516	0.980682665	0.991570263	0.994649099	1.003889013	1.002398953	0.99891419	0.983874159	0.971714204	0.983250205
14:47:15.072	1.035417912	1.132486423	0.910183329	0.908938076	0.911000619	0.909946866	0.951877234	0.95394174	0.961201733	0.97360691	0.983584401	0.986827813	0.995704879	0.994557714	0.991194085	0.977727605	0.967782847	0.978269213
14:47:15.936	1.029244572	1.107514267	0.910029621	0.908902789	0.911173449	0.910116814	0.952038683	0.953967774	0.961189728	0.973673492	0.983883958	0.98660875	0.995934852	0.994637267	0.991261119	0.977772187	0.967869114	0.978264499
14:47:17.664	1.025872785	1.114928308	0.910061343	0.909000744	0.911306077	0.910178286	0.952212771	0.954062532	0.961306275	0.973808122	0.984092842	0.986873047	0.996262837	0.994891881	0.991550942	0.978162788	0.968395967	0.97865877
14:47:18.528	1.032135521	1.118476786	0.909929461	0.908922267	0.91111487	0.910112709	0.952085128	0.953989225	0.96117388	0.973640631	0.983805749	0.986580837	0.995878357	0.994578469	0.991133932	0.977652787	0.967893253	0.978102487
14:47:19.392	1.022672196	1.112073924	0.910036602	0.908957415	0.911181122	0.910164106	0.952080943	0.954065128	0.961274063	0.97375698	0.984022871	0.986721598	0.99625276	0.994860639	0.991530184	0.978063915	0.96844787	0.978623963
14:47:20.256	1.02859273	1.112772535	0.909898541	0.908818269	0.911089839	0.910101728	0.952074836	0.953990476	0.961166005	0.97359731	0.983875176	0.986617162	0.996079441	0.99464602	0.991302244	0.977779667	0.968179224	0.978279027
14:47:21.120	1.028048954	1.103079578	0.910127582	0.908785218	0.911071123	0.910024131	0.951921072	0.9538441	0.96104821	0.973443204	0.983652035	0.986344005	0.995834378	0.994405992	0.990967766	0.977420522	0.967849578	0.977872371
14:47:21.984	1.026107283	1.11684785	0.909835073	0.908755933	0.911090548	0.910074973	0.952087271	0.953874703	0.961096829	0.973552104	0.98382367	0.986501139	0.996001491	0.994633855	0.991298017	0.977776649	0.968338049	0.978367863
14:47:22.848	1.033883263	1.11469484	0.909920064	0.908659977	0.911	0.910069632	0.95194865	0.953916249	0.961090618	0.97353992	0.98363549	0.986570848	0.996025175	0.994643909	0.99135104	0.977797446	0.968392465	0.978422713
14:47:24.576	1.030493343	1.109732855	0.909783271	0.908678718	0.911044364	0.909981671	0.952003696	0.953906643	0.961124611	0.973567826	0.983711507	0.986688175	0.996256537	0.994765041	0.99157239	0.97812292	0.96872095	0.978825441
14:47:25.440	1.026472212	1.106169428	0.909742866	0.908626303	0.911024031	0.909984056	0.95202357	0.95392378	0.961151458	0.973630719	0.9837761	0.986846607	0.996384374	0.994920468	0.991680218	0.978391165	0.969049489	0.979127924
14:47:26.304	1.024512981	1.106732095	0.90965192	0.908601903	0.910939099	0.909884473	0.951971548	0.953906795	0.961079307	0.973560474	0.983750886	0.98677097	0.996440538	0.994885828	0.991637046	0.978485181	0.96911611	0.979172991
14:47:27.168	1.026768057	1.119371638	0.909714707	0.908506567	0.910958767	0.909917661	0.952059193	0.954013226	0.961161667	0.973705356	0.983950053	0.986910905	0.996713473	0.995115267	0.992001048	0.978952442	0.969645288	0.979673167
14:47:28.032	1.027279942	1.122349953	0.90959267	0.908425665	0.910884846	0.909866633	0.951936715	0.953833169	0.961020021	0.973466176	0.983671638	0.986650669	0.996338746	0.994751546	0.991582226	0.978485807	0.969243339	0.979174649
14:47:28.896	1.026826945	1.114229735	0.909731197	0.908480443	0.910830746	0.909804679	0.951788377	0.953667632	0.960808015	0.973219196	0.983247288	0.986150288	0.995909444	0.994223931	0.990978431	0.977779567	0.968668544	0.978570498
14:47:29.760	1.031445193	1.116156769	0.909746972	0.908385123	0.910799286	0.909794753	0.951776886	0.953701781	0.960828277	0.97321732	0.983459469	0.986331614	0.996052992	0.994373196	0.991306645	0.978277127	0.969205611	0.978991406
14:47:30.624	1.024461859	1.118472474	0.909496171	0.90836165	0.910744111	0.909725779	0.951743747	0.953593958	0.960735032	0.97313558	0.983299954	0.986186026	0.996002977	0.9943091	0.991279824	0.978288336	0.969318328	0.979126698
14:47:32.352	1.026381362	1.114486139	0.909515649	0.90834665	0.910699052	0.909634701	0.951749535	0.953551158	0.960653287	0.973053129	0.983245727	0.986175077	0.99590116	0.994290895	0.991348142	0.978491183	0.969637383	0.979363426
14:47:33.216	1.0273661	1.10423392	0.909434114	0.908228431	0.91063876	0.909621965	0.951583343	0.953355153	0.960429136	0.972750677	0.982874437	0.985746127	0.995542161	0.993843422	0.99078932	0.977983091	0.969157706	0.97885158
14:47:34.080	1.031146601	1.120656342	0.90914984	0.908163418	0.910520394	0.909525742	0.951434064	0.953215252	0.960216449	0.972535566	0.982564683	0.985528528	0.995317916	0.993613396	0.990603645	0.977856992	0.969103293	0.97879062
14:47:34.944	1.027846978	1.111712749	0.909267339	0.908023925	0.910437598	0.909433837	0.951245915	0.952985965	0.960015239	0.972240833	0.982234062	0.985154423	0.994871536	0.993266818	0.990137449	0.977403507	0.968736262	0.978416604
14:47:35.808	1.02878708	1.11956778	0.909106224	0.907977549	0.910368118	0.909313539	0.951134627	0.952813005	0.959784647	0.971970212	0.981911037	0.984724457	0.994584735	0.992849695	0.989824388	0.977264201	0.968557308	0.978205492
14:47:36.672	1.026419847	1.117321615	0.908974691	0.907989562	0.910331678	0.909255392	0.951112368	0.952792499	0.959731091	0.971877891	0.981887963	0.984783879	0.994573976	0.992939588	0.990022785	0.977592125	0.969028108	0.978808861
14:47:37.536	1.028282129	1.116261721	0.90910814	0.907758208	0.910257791	0.9092653	0.950925735	0.952603024	0.959522738	0.971623406	0.981669625	0.984481413	0.994230851	0.992619411	0.989744755	0.977425526	0.968846908	0.978584848
14:47:38.400	1.030289414	1.120709007	0.909085174	0.907755358	0.910105125	0.909095257	0.950602872	0.952227901	0.959118865	0.971072011	0.980875588	0.983682379	0.993329791	0.991772093	0.988660957	0.97630238	0.967870269	0.977493964
14:47:40.128	1.024139118	1.112630854	0.908988971	0.907641833	0.909915633	0.908878291	0.950283129	0.951808502	0.958620002	0.970455333	0.980087171	0.982699483	0.992135657	0.990701177	0.987490657	0.974891032	0.966549308	0.976096394
14:47:40.992	1.025471877	1.110708956	0.908843321	0.907629731	0.909778046	0.908821119	0.950133788	0.951688544	0.958417999	0.970243741	0.979968808	0.982530597	0.992012412	0.990532739	0.987410761	0.975044894	0.966779464	0.976329109
14:47:41.856	1.025510851	1.106678697	0.908589789	0.90759414	0.909743691	0.908766871	0.949978833	0.951479503	0.958189478	0.9699499	0.979558756	0.982130868	0.99161373	0.990160421	0.987058071	0.974777523	0.966596948	0.976134605
14:47:42.720	1.016521314	1.10498032	0.908850597	0.907381253	0.90963952	0.90866021	0.949884225	0.951315354	0.958010903	0.969764311	0.979282732	0.981968886	0.991520621	0.990014779	0.986969605	0.97500197	0.966930598	0.976476413
14:47:43.584	1.024632331	1.110640969	0.908513382	0.907430665	0.909604421	0.90862096	0.949789349	0.951125122	0.957796561	0.969491356	0.979005012	0.981654129	0.991170906	0.989677315	0.986716385	0.974915085	0.966845182	0.976404511
14:47:44.448	1.023780542	1.097589459	0.908509833	0.907234946	0.909420733	0.908439164	0.949546404	0.950873271	0.957509735	0.969138439	0.978542237	0.981237492	0.990630041	0.989187329	0.986248876	0.974592606	0.966572956	0.976151876
14:47:45.312	1.025242457	1.104441183	0.908408453	0.907129763	0.909272394	0.908336415	0.949259839	0.950523366	0.957097736	0.968579097	0.977959813	0.98044926	0.989814673	0.988406243	0.985358874	0.973755236	0.965859183	0.975360979
14:47:47.040	1.023125806	1.112068398	0.908360396	0.907039466	0.909187027	0.908146326	0.949077804	0.950312803	0.956845266	0.968328949	0.977690018	0.980136653	0.989534149	0.988122626	0.98519823	0.973792648	0.965974617	0.975588523
14:47:47.904	1.019774321	1.104738237	0.907996624	0.906919625	0.909126086	0.908001617	0.948954388	0.950113399	0.956635753	0.968063646	0.977409216	0.979830279	0.989241554	0.987826679	0.98496473	0.973797196	0.966089867	0.975693875
14:47:48.768	1.023131148	1.100016435	0.907977171	0.906863336	0.908939417	0.907889249	0.948551282	0.949724176	0.956165019	0.967445167	0.976687624	0.978947665	0.988285405	0.986964598	0.983993085	0.972907293	0.965223913	0.974816849
14:47:49.632	1.02226029	1.103111185	0.907767258	0.906597639	0.90869246	0.907692958	0.948330825	0.949371535	0.955758709	0.966975606	0.976111144	0.978295931	0.987719993	0.986314041	0.983314486	0.972364086	0.964757689	0.974449101
14:47:50.496	1.021466412	1.127293914	0.907838509	0.906492048	0.908645646	0.907512186	0.948108362	0.949121826	0.955482108	0.96665658	0.975783628	0.9779594	0.987272595	0.985907393	0.982957246	0.972124286	0.964569273	0.974220352
14:47:51.360	1.019647792	1.120513432	0.907762754	0.906280321	0.908389078	0.90726831	0.947733102	0.948625274	0.95490211	0.965892169	0.974833251	0.97686183	0.986025342	0.984717024	0.981686509	0.970681089	0.963225281	0.972837466
14:47:52.224	1.018867238	1.110819601	0.90754655	0.906221176	0.908293005	0.907173163	0.947566184	0.948456243	0.95466427	0.965646852	0.974468768	0.976613465	0.985767796	0.98449761	0.98153518	0.970860885	0.963474123	0.973130547
14:47:53.088	1.021956466	1.106904731	0.907415492	0.906092425	0.908116721	0.9070061	0.947200717	0.948062838	0.95427114	0.965131925	0.973799228	0.975997235	0.984978861	0.983759842	0.980776784	0.970147714	0.962914107	0.972495495
14:47:54.816	1.021992305	1.105058742	0.907454369	0.906143852	0.908082264	0.907074255	0.947144886	0.948014097	0.954164788	0.965014388	0.973789636	0.975900651	0.984946427	0.983746929	0.98092203	0.970663985	0.963493424	0.973091161
14:47:55.680	1.025611184	1.111155783	0.907365418	0.906009178	0.90799377	0.90699691	0.947099569	0.947893329	0.954012458	0.964812265	0.973541284	0.975705505	0.984817504	0.983580913	0.980898134	0.970835705	0.963778438	0.973441523
14:47:56.544	1.02360229	1.102984132	0.907232173	0.905940842	0.907810037	0.906749282	0.946770347	0.947482734	0.953534193	0.964172315	0.972689833	0.974835103	0.983809695	0.982576252	0.979676471	0.969584221	0.962557083	0.972190146
14:47:57.408	1.024496189	1.117705758	0.907237965	0.905935026	0.907719573	0.906639417	0.9465248	0.947189249	0.953176022	0.963717731	0.972087508	0.974281107	0.983234452	0.981919925	0.978978894	0.968982723	0.961965399	0.971648378
14:47:58.272	1.02260449	1.118472156	0.907279681	0.905758849	0.907469341	0.906412503	0.946128464	0.946692912	0.952602961	0.962997302	0.970981802	0.973206112	0.982021498	0.980759266	0.977609869	0.96746209	0.960531864	0.970017043
14:47:59.136	1.027645292	1.120824462	0.906942943	0.905625252	0.907385446	0.90634283	0.945993415	0.946561466	0.952446362	0.962826024	0.970946746	0.973077557	0.982042548	0.980735171	0.977785058	0.968104601	0.961152438	0.970937086
14:48:00.000	1.023568714	1.10456342	0.906975209	0.905638653	0.907367742	0.906293125	0.94600833	0.946492053	0.952362061	0.962742948	0.970931754	0.973040007	0.982078936	0.980785995	0.978062952	0.968588259	0.961702766	0.971591523
14:49:16.032	1.021192613	1.1382546	0.901123579	0.898656914	0.899995363	0.898840621	0.934806465	0.933085195	0.936784805	0.943870219	0.949411902	0.949744388	0.958374504	0.956957355	0.95523088	0.952678189	0.951346034	0.95945658
14:49:16.896	1.013055527	1.09660831	0.900700506	0.898742668	0.899911168	0.898749579	0.934353568	0.932634622	0.936334662	0.94326929	0.948146128	0.948589771	0.957350784	0.955981181	0.953826987	0.95101354	0.949951297	0.957882903
14:49:17.760	1.011959738	1.084451955	0.900683464	0.898727667	0.89988182	0.898689293	0.93422042	0.932431199	0.936105363	0.942961442	0.947709509	0.948207883	0.956799953	0.955518803	0.953373418	0.95063849	0.949765801	0.957602608
14:49:18.624	1.013357615	1.090988026	0.900953355	0.898694425	0.899728809	0.898705496	0.934082735	0.93224037	0.935869785	0.942668573	0.947383459	0.947761458	0.956380762	0.955044249	0.952838964	0.950022529	0.949198718	0.957001035
14:49:19.488	1.012393495	1.106719518	0.900667063	0.898690748	0.899681578	0.898608785	0.93398533	0.932127746	0.935745006	0.942482169	0.947175689	0.947563284	0.956230064	0.954930234	0.952781324	0.950103048	0.949286203	0.957171412
14:49:20.352	1.013012554	1.109764161	0.900502688	0.898574362	0.899575238	0.898487395	0.933798927	0.931883518	0.935520558	0.942222043	0.946916076	0.947322226	0.955913971	0.954572858	0.952480883	0.949925078	0.949159984	0.957050674
14:49:22.080	1.013102474	1.107513255	0.900394378	0.898488438	0.899386868	0.898268851	0.93356862	0.931631384	0.935159613	0.941772892	0.946305486	0.946452991	0.955075454	0.953804602	0.951535208	0.948815707	0.948095611	0.955878584
14:49:22.944	1.015373953	1.109108557	0.900464988	0.898401325	0.899315012	0.898216384	0.933400591	0.931400725	0.934893448	0.941444307	0.945923165	0.945966915	0.954578612	0.953322018	0.950974103	0.948218577	0.947562959	0.955338907
14:49:23.808	1.013645422	1.091887735	0.90033512	0.898270382	0.899285984	0.898157093	0.933220852	0.931227132	0.934737706	0.941233122	0.945660851	0.945803785	0.954417733	0.953098271	0.950791205	0.948229536	0.947588173	0.955373144
14:49:24.672	1.014446648	1.099698487	0.900274695	0.898184184	0.899158409	0.897984334	0.933159054	0.931093571	0.934586789	0.941066956	0.945512588	0.945577125	0.954245257	0.952969746	0.950770951	0.9483833	0.947812994	0.955676611
14:49:25.536	1.009803211	1.089211638	0.899941374	0.898113226	0.899062058	0.898008989	0.933016895	0.930934897	0.934359291	0.940788278	0.945262681	0.945233722	0.953912108	0.952592456	0.950361939	0.948080943	0.947514001	0.955413514
14:49:26.400	1.012400305	1.10296037	0.899884092	0.898049873	0.898965735	0.897905345	0.932806743	0.930661828	0.93406326	0.940412981	0.944732166	0.944669821	0.953271718	0.951999414	0.949622261	0.947331504	0.94678988	0.954637721
14:49:27.264	1.014379773	1.101178044	0.899926011	0.897889981	0.898879413	0.897735519	0.932588291	0.930479369	0.933836842	0.940135105	0.944372746	0.944291915	0.952896409	0.951597385	0.949220606	0.946894773	0.946404888	0.95426695
14:49:28.128	1.020867393	1.091544238	0.899809584	0.897775303	0.898730466	0.897646215	0.932480404	0.930313428	0.93364354	0.939900809	0.944122032	0.944046271	0.952670524	0.951370912	0.949043653	0.946938451	0.946430521	0.954357893
14:49:29.856	1.015429773	1.102342925	0.899842181	0.897756664	0.89869831	0.897482688	0.932313056	0.930165271	0.933441944	0.939642465	0.943853147	0.943673807	0.952350004	0.951050988	0.948719933	0.946738214	0.946193684	0.954178363
14:49:30.720	1.016201309	1.094952039	0.899855038	0.897641409	0.898563341	0.897370696	0.932192113	0.92991196	0.933197374	0.939342219	0.943526427	0.943312416	0.951903122	0.950671812	0.948306217	0.946420248	0.945882176	0.953945861
14:49:31.584	1.010590212	1.090487658	0.8998571	0.897573617	0.898409592	0.897233506	0.931890345	0.929638602	0.932855725	0.938922108	0.942963226	0.942770558	0.951325376	0.950014953	0.947571195	0.945681065	0.94515679	0.95322305
14:49:32.448	1.012420546	1.091807731	0.89951251	0.897385439	0.898350978	0.897197945	0.931791363	0.929509301	0.932684873	0.938762817	0.942844006	0.942536219	0.951212838	0.949867201	0.947517182	0.945868918	0.945413741	0.953509568
14:49:33.312	1.015929444	1.084576736	0.899399214	0.897318344	0.898166811	0.896972778	0.93155885	0.929264979	0.932398981	0.938399201	0.94237281	0.942124862	0.950678403	0.949382224	0.947003249	0.945430097	0.944966008	0.953097314
14:49:34.176	1.011654176	1.098094076	0.899281415	0.897318904	0.898115141	0.897001573	0.931431628	0.929101764	0.932221732	0.938159741	0.942142139	0.941908847	0.95053103	0.949144161	0.946868578	0.945503921	0.945097661	0.953252857
14:49:35.040	1.012086142	1.092356796	0.899195272	0.897092965	0.898001036	0.896911738	0.931312333	0.928897407	0.932052639	0.937955957	0.941921149	0.941711028	0.95034365	0.948959837	0.946799059	0.94565307	0.945324519	0.953607892
14:49:35.904	1.012499068	1.0923492	0.89917125	0.897087737	0.897850447	0.896787001	0.931069083	0.928637371	0.931732314	0.93754015	0.941425192	0.941121215	0.949654837	0.948353345	0.946149608	0.944961644	0.944711483	0.952901264
14:49:37.632	1.014959079	1.093724917	0.899179602	0.89697045	0.897712725	0.896691971	0.93087082	0.928402663	0.931422054	0.937183325	0.941062469	0.940659639	0.949235102	0.947843323	0.945684175	0.944529257	0.94441285	0.952535362
14:49:38.496	1.009098724	1.089064228	0.899130317	0.896878762	0.897602251	0.89653879	0.930721159	0.928201774	0.931199097	0.936920831	0.940786909	0.940280622	0.94891903	0.947511923	0.945416068	0.944490313	0.944389539	0.952533402
14:49:39.360	1.010654665	1.100720119	0.898825716	0.896765689	0.897519725	0.896383344	0.93058593	0.92799448	0.930950107	0.936640464	0.94038753	0.939970579	0.948509849	0.947190832	0.945153252	0.944324675	0.944348852	0.952544685
14:49:40.224	1.014079431	1.095667082	0.898913188	0.896662355	0.89739034	0.89624646	0.930430163	0.927834088	0.930723511	0.93638399	0.940177955	0.93967414	0.948281659	0.946893899	0.944859954	0.944207344	0.944334877	0.952565956
14:49:41.088	1.013254288	1.093823924	0.898714564	0.896602233	0.897250325	0.896263811	0.930122846	0.927541012	0.930424268	0.936013033	0.939682503	0.939100765	0.947706749	0.946342731	0.944269983	0.943719639	0.943783436	0.95199226
14:49:41.952	1.008002365	1.096288268	0.898630268	0.896386529	0.897149816	0.895962853	0.929964372	0.927293108	0.930137152	0.935628451	0.939214579	0.938538582	0.947177975	0.945845795	0.943730486	0.943145583	0.943361812	0.951517205
14:49:42.816	1.00805548	1.083983454	0.898567203	0.896387539	0.897087019	0.896009246	0.929916655	0.927241414	0.930104238	0.935589169	0.939313046	0.938732992	0.94740485	0.946002855	0.944170627	0.943906531	0.944250093	0.952513079
14:49:44.544	1.008636944	1.090131685	0.898543242	0.89624963	0.896946687	0.895757998	0.929690701	0.926966505	0.92980367	0.935172193	0.938781211	0.938172237	0.946775158	0.945407692	0.943507528	0.943220145	0.943690342	0.951882305
14:49:45.408	1.010552742	1.097334425	0.898289648	0.896060817	0.896820671	0.895724199	0.929527374	0.926747568	0.929522255	0.934880031	0.938367535	0.937800594	0.946333108	0.944971597	0.943070933	0.942919402	0.943398155	0.951555092
14:49:46.272	1.008169579	1.104272186	0.898279021	0.896012106	0.896749802	0.895565484	0.929388392	0.926564496	0.929327471	0.934663635	0.938209333	0.937564898	0.946130113	0.944749321	0.942896383	0.942946456	0.943501348	0.951658514
14:49:47.136	1.007147819	1.088347338	0.897949905	0.89597712	0.896627791	0.895480221	0.929138987	0.92631671	0.929037627	0.934287757	0.937654371	0.936904418	0.945450244	0.94414723	0.942224904	0.942311223	0.942933513	0.950998743
14:49:48.000	1.008018515	1.083279407	0.898057823	0.895873756	0.896574002	0.895445818	0.928968796	0.926255859	0.928942267	0.934212989	0.937619219	0.936969187	0.945568907	0.944199054	0.94246307	0.942810048	0.943504871	0.951651962
14:49:48.864	1.007970787	1.098303477	0.898149126	0.895835988	0.896449576	0.895411392	0.928874836	0.925996413	0.928661887	0.933867001	0.937274099	0.936461964	0.945042361	0.943729299	0.941887137	0.942281443	0.943084637	0.951183178
14:49:49.728	1.009144017	1.099605038	0.898107877	0.895697349	0.896349551	0.895350332	0.928775574	0.925932048	0.928548146	0.933748532	0.937152137	0.936450796	0.945056626	0.943734006	0.942108389	0.942753063	0.943666328	0.951762105
14:49:50.592	1.010265791	1.095571183	0.897974793	0.89564794	0.896286892	0.89518095	0.92862119	0.925735967	0.928329741	0.933468166	0.93683455	0.936073248	0.94471799	0.943347797	0.941749561	0.942446039	0.943485348	0.951586994
14:49:52.320	1.011093324	1.093235604	0.897847803	0.895562724	0.89620493	0.895064402	0.928390899	0.925480615	0.928049609	0.933140258	0.936394428	0.935582318	0.944225257	0.942865905	0.941161757	0.941874007	0.942924703	0.951005128
14:49:53.184	1.010621377	1.092023006	0.897692375	0.895373587	0.896064805	0.894930667	0.928207178	0.925182329	0.927705411	0.932670548	0.935759074	0.935015081	0.943520924	0.942133924	0.940215534	0.940907381	0.941992681	0.950084692
14:49:54.048	1.011856079	1.090518435	0.897563229	0.895348725	0.895967955	0.894754999	0.927978812	0.924948512	0.92745762	0.932365152	0.935422983	0.934491999	0.943102057	0.941665106	0.939726301	0.94043139	0.941516676	0.949516565
14:49:54.912	1.011886117	1.097930573	0.897588502	0.895232171	0.895814888	0.894657042	0.927806285	0.924716686	0.927167138	0.931999864	0.934962328	0.933892504	0.942576658	0.941095116	0.939135354	0.939838838	0.940937706	0.948851381
14:49:55.776	1.01142276	1.094190968	0.897474421	0.89517712	0.895696029	0.894583904	0.927670996	0.924604088	0.927047172	0.931880393	0.934810782	0.933837888	0.942581251	0.941085466	0.939171816	0.940154689	0.941299725	0.949340678
14:49:56.640	1.012397589	1.093517769	0.897335748	0.895054654	0.895643363	0.894470336	0.927613787	0.92443834	0.926855329	0.931631639	0.934513743	0.933560366	0.942210042	0.940824952	0.938910959	0.940027595	0.941307648	0.949354789
14:49:57.504	1.010857545	1.093865623	0.897391105	0.895013387	0.895527772	0.894369602	0.927355177	0.924246247	0.926595672	0.931362921	0.934155065	0.933098975	0.941865093	0.940339115	0.938437808	0.939557514	0.940811084	0.948814724
14:49:58.368	1.007818505	1.088021734	0.89737794	0.895027562	0.895395872	0.894337768	0.927261298	0.924088099	0.926484066	0.931178612	0.933984232	0.932938394	0.941649859	0.940219476	0.938393779	0.939621972	0.94094151	0.948980898
14:50:00.096	1.003007747	1.091988566	0.897142842	0.894865943	0.895356717	0.894167263	0.927184907	0.923923278	0.926250453	0.930920739	0.933699282	0.932637243	0.941364262	0.939897074	0.938058815	0.939348454	0.940738316	0.948801509
14:50:00.960	1.006458797	1.095345402	0.897262968	0.894706982	0.895194356	0.894081178	0.926943985	0.923727364	0.926059571	0.930683483	0.93345657	0.932434692	0.94108687	0.939601534	0.937800971	0.939151951	0.940541355	0.948654172
14:51:16.128	1.022171038	1.079688018	0.89133647	0.888508822	0.889008078	0.887907822	0.918188312	0.913438468	0.914370267	0.916805428	0.91792279	0.915372222	0.923689428	0.922296367	0.920981529	0.926715385	0.930972849	0.938958276
14:51:16.992	1.001770802	1.084467848	0.89120548	0.888444837	0.888934893	0.887633688	0.918178037	0.913319216	0.914236272	0.916597831	0.917366911	0.91517537	0.923526705	0.922042713	0.920539517	0.926403295	0.930595211	0.938743678
14:51:17.856	0.996611371	1.083454007	0.891321847	0.888503991	0.888898929	0.88758457	0.918172844	0.913320562	0.914185532	0.91652499	0.91732027	0.915070971	0.923408858	0.921984087	0.920500733	0.926453376	0.930702232	0.938806013
14:51:18.720	0.998091428	1.069905495	0.891078164	0.888422901	0.888782096	0.88753318	0.917949246	0.913072378	0.913918723	0.916140035	0.91680161	0.914484157	0.922764191	0.921304923	0.919557278	0.925340108	0.929568612	0.937614427
14:51:19.584	0.999424414	1.074661916	0.891105133	0.8882376	0.888668555	0.887451692	0.917856404	0.912957412	0.913804902	0.916028873	0.916573449	0.914334613	0.922606314	0.921186052	0.919485066	0.925281746	0.929569434	0.937650855
14:51:20.448	0.9952161	1.088390886	0.890990563	0.888217773	0.88859893	0.887398029	0.917832159	0.91291715	0.913779641	0.91599256	0.916643255	0.914413719	0.922745391	0.92127056	0.919769698	0.925748853	0.930060379	0.938209585
14:51:21.312	1.000075022	1.070393995	0.890918755	0.888227431	0.88848139	0.887366831	0.917696606	0.912719779	0.913539434	0.915713477	0.916227064	0.913962583	0.922223739	0.920821567	0.919110435	0.925010457	0.92935767	0.937423023
14:51:23.040	0.999537044	1.083623287	0.890984207	0.888118342	0.88850282	0.887332485	0.917552932	0.9125797	0.913390223	0.915551134	0.916111203	0.913692147	0.921951853	0.920605602	0.918863505	0.924758958	0.929096157	0.93708382
14:51:23.904	0.996352655	1.076424625	0.890919246	0.888058253	0.888407493	0.887268298	0.917489426	0.912532522	0.913332083	0.915475644	0.916001853	0.913669956	0.922010811	0.920569676	0.918939166	0.924959314	0.929378899	0.937373938
14:51:24.768	0.997303746	1.072633925	0.890735682	0.887924258	0.888336422	0.887111577	0.917336484	0.91238552	0.913170958	0.915290997	0.915791805	0.913462165	0.921726812	0.920289655	0.918581336	0.92458152	0.929043186	0.936967365
14:51:25.632	0.996802067	1.079338474	0.890709002	0.887852933	0.888253023	0.88703544	0.917311698	0.912320819	0.913121048	0.915281472	0.915769683	0.913497144	0.921697361	0.920318146	0.918744385	0.92494186	0.929472244	0.93738621
14:51:26.496	0.99625563	1.076812953	0.890564886	0.887779178	0.888238012	0.887044912	0.917296717	0.912314175	0.913138711	0.915298709	0.915833015	0.913746753	0.92201621	0.920583372	0.919219657	0.925722616	0.930300821	0.938337924
14:51:27.360	1.000080032	1.083312094	0.890426645	0.887810551	0.888237032	0.887025755	0.917344026	0.912361215	0.913238002	0.91547832	0.916047479	0.914041316	0.922421962	0.920976436	0.919859905	0.926636891	0.93130979	0.939326337
14:51:28.224	1.002317598	1.077672834	0.89053864	0.887736461	0.888122366	0.886888391	0.91723456	0.912238317	0.913077055	0.915259537	0.915747737	0.913833033	0.92210676	0.920733123	0.919496127	0.926247473	0.930995536	0.938987303
14:51:29.088	0.999611555	1.073155738	0.890572192	0.887562478	0.888045917	0.886861764	0.917085661	0.912093027	0.912877391	0.915027851	0.915569556	0.913414707	0.921781829	0.920374781	0.919012806	0.925724086	0.930535104	0.938501135
14:51:30.816	0.996195493	1.085577669	0.890484092	0.887573713	0.887971421	0.886681506	0.916982176	0.91195095	0.912749521	0.914896652	0.915346068	0.91326553	0.921656016	0.92024572	0.918925564	0.925800692	0.930653679	0.938504449
14:51:31.680	0.997839253	1.069006969	0.890486904	0.887469596	0.887861801	0.886604771	0.916820494	0.911714903	0.912493794	0.914579423	0.914923013	0.912830098	0.921114341	0.919709822	0.918272304	0.924961916	0.929997114	0.937800168
14:51:32.544	0.996550003	1.078819113	0.890164191	0.887335463	0.887776504	0.886561457	0.916673393	0.911606773	0.91234717	0.914392071	0.914708907	0.912549441	0.920843674	0.919465834	0.91799606	0.924752001	0.92984248	0.937589015
14:51:33.408	1.004554577	1.076913156	0.890197549	0.887331451	0.887675832	0.886472022	0.916608505	0.911506867	0.912238913	0.914254326	0.914685905	0.912437451	0.920826391	0.919401665	0.918009285	0.92489441	0.930120158	0.93782698
14:51:34.272	1.003331516	1.080627472	0.890091593	0.887257989	0.887606711	0.886346033	0.916468095	0.911282651	0.912027075	0.913970141	0.91427117	0.91208813	0.920359579	0.919008632	0.917619681	0.924493717	0.929797039	0.93747641
14:51:35.136	1.000501813	1.082342836	0.889887244	0.887051485	0.887467388	0.886205774	0.916273692	0.911083598	0.911803315	0.913739817	0.913996633	0.911727158	0.920053432	0.918692911	0.917285462	0.924252111	0.929619969	0.937245998
14:51:36.000	1.002290713	1.08230369	0.889910946	0.886937774	0.887393404	0.885994884	0.916157687	0.910896017	0.911564445	0.913451568	0.913710741	0.911325808	0.91960652	0.918249159	0.916767241	0.923721337	0.929204054	0.936773829
14:51:37.728	0.998431895	1.072035873	0.88978688	0.886934009	0.887290837	0.885985248	0.915855039	0.910630939	0.911289781	0.913064383	0.913184296	0.910788702	0.918999432	0.917606752	0.916012805	0.922932757	0.928488624	0.936036039
14:51:38.592	0.997664694	1.081118871	0.889750948	0.886862092	0.887108976	0.885919127	0.915760373	0.910463812	0.91105407	0.912816389	0.912877442	0.91033111	0.918621611	0.917178355	0.915555302	0.922556675	0.928165984	0.935635944
14:51:39.456	0.995829432	1.081645295	0.88972006	0.88678956	0.887063526	0.885907873	0.915584988	0.910271335	0.910824007	0.912510852	0.912514962	0.909934794	0.918232386	0.916819952	0.915184275	0.922368142	0.928079575	0.935522129
14:51:40.320	0.997294433	1.076167235	0.889498077	0.886645334	0.886965828	0.885662803	0.915495338	0.910110669	0.910662577	0.912335394	0.912382178	0.909763541	0.918047497	0.916651854	0.915171478	0.922572565	0.928364761	0.935864075
14:51:41.184	0.997870925	1.073608441	0.889537103	0.886538041	0.886880043	0.885618572	0.915221807	0.90983615	0.910333688	0.911939458	0.911880274	0.909213685	0.917519397	0.91604527	0.914490251	0.921948031	0.927870347	0.935306041
14:51:42.048	0.999171503	1.081182134	0.889314861	0.88637424	0.886695521	0.885481586	0.914971005	0.909468192	0.909913309	0.911361541	0.911143693	0.908254413	0.916605578	0.915115003	0.913290729	0.920584274	0.926550267	0.933800287
14:51:42.912	0.993845077	1.081157819	0.88918793	0.886383068	0.886634823	0.885368182	0.914847591	0.909349324	0.909838964	0.911265794	0.911066524	0.908251018	0.916581045	0.915112022	0.913448442	0.921140172	0.927113751	0.934570535
14:51:43.776	0.996783712	1.079227148	0.889291173	0.886296974	0.886449835	0.885290167	0.914586953	0.909049856	0.909459244	0.910790702	0.910405372	0.907476186	0.915744865	0.914316025	0.912457935	0.919966352	0.926046242	0.933401802
14:51:45.504	0.994389602	1.080555965	0.889044076	0.886234444	0.886417259	0.885239046	0.914571805	0.90905023	0.909483592	0.910858335	0.910551804	0.907812988	0.916207255	0.914677518	0.913121048	0.921159863	0.927227032	0.934859501
14:51:46.368	0.997346896	1.086678818	0.888941031	0.886154394	0.886345121	0.885183663	0.914431686	0.908874798	0.909294147	0.91066006	0.910342068	0.907484294	0.915901668	0.914392471	0.912893948	0.921063287	0.927131484	0.934823963
14:51:47.232	0.99462029	1.079154528	0.888874817	0.885957241	0.886233449	0.884957033	0.914252677	0.908655189	0.909033585	0.91032921	0.90999276	0.907034103	0.915426284	0.913845539	0.912312169	0.920513668	0.926558726	0.934296937
14:51:48.096	0.99527621	1.07993521	0.888971587	0.885915548	0.886209962	0.884971823	0.914154637	0.908560722	0.908925211	0.910212192	0.909796245	0.906877324	0.9153085	0.913738445	0.912268903	0.920557162	0.926694385	0.934448703
14:51:48.960	0.996100724	1.074332841	0.888940648	0.885874744	0.886072092	0.884880652	0.91406474	0.908454306	0.908807634	0.910064076	0.909639561	0.906649187	0.91506746	0.913598487	0.912101763	0.920550868	0.926658107	0.934388056
14:51:49.824	0.994860002	1.076206677	0.88894474	0.88587763	0.88602283	0.884760204	0.913959224	0.908349501	0.908688194	0.909945805	0.909504763	0.906575904	0.914894489	0.913425454	0.911949464	0.920370892	0.926648544	0.934337177
14:51:50.688	0.993388247	1.068490914	0.88856182	0.885701422	0.885982082	0.884717025	0.913946339	0.908246149	0.908611525	0.90981698	0.909428947	0.906536262	0.914885925	0.913345795	0.911856562	0.920401872	0.926686451	0.934295624
14:51:51.552	0.99435144	1.069710739	0.888611309	0.885713305	0.885937299	0.884702659	0.913947886	0.90825808	0.908574751	0.909802701	0.909408072	0.906492776	0.914760388	0.913377984	0.912010788	0.920609383	0.926913719	0.934494659
14:51:53.280	0.994820524	1.075888768	0.888579536	0.885637472	0.885944195	0.884704891	0.91388645	0.90823851	0.908608846	0.909862202	0.909490912	0.906743507	0.915015523	0.913600405	0.912361316	0.921148403	0.927522979	0.935252857
14:51:54.144	0.995746737	1.072860446	0.888560294	0.885555314	0.885840972	0.884660149	0.913934577	0.908250181	0.90858914	0.909858365	0.909462544	0.906795691	0.915096857	0.913650602	0.912521856	0.921338373	0.927720856	0.935451925
14:51:55.008	0.993143153	1.072552697	0.888591804	0.885522229	0.885771798	0.88464148	0.91376618	0.908016224	0.908376464	0.909550333	0.909088864	0.906283709	0.914521921	0.913100091	0.911734079	0.92039657	0.926709862	0.934293469
14:51:55.872	0.991134174	1.072449414	0.888377225	0.885363022	0.885723037	0.884428799	0.913585278	0.907911659	0.908251918	0.909421918	0.908903029	0.906070256	0.914277547	0.912899088	0.911406377	0.92001611	0.926374243	0.93393555
14:51:56.736	0.993448394	1.071207446	0.888298804	0.88535729	0.88563211	0.884434223	0.913551936	0.907826593	0.908175057	0.909325587	0.908785955	0.905965691	0.914173832	0.912761648	0.911284058	0.919814437	0.92620942	0.93379138
14:51:57.600	0.994759654	1.078430313	0.888329801	0.885273923	0.885609363	0.884408685	0.913509785	0.907816008	0.908127081	0.909292446	0.908723623	0.905942753	0.914112621	0.912760014	0.911297919	0.919799103	0.926204733	0.933758627
14:51:58.464	0.998401014	1.080568588	0.888234725	0.885223027	0.885522477	0.884363488	0.913490148	0.907756019	0.908078794	0.909239807	0.908702936	0.905882642	0.914117064	0.912721303	0.911282642	0.919789383	0.92620317	0.933714422
14:52:00.192	0.992385607	1.07085595	0.888190034	0.885198556	0.885558441	0.884313185	0.913487609	0.907782301	0.908110729	0.909294731	0.908735775	0.906047169	0.914335271	0.912852763	0.911490163	0.920088029	0.926559426	0.934095747
14:53:15.360	0.994393394	1.058623226	0.882249912	0.879346533	0.879476314	0.878388091	0.905054483	0.898060255	0.897409572	0.896741298	0.894279066	0.890072552	0.897935005	0.896597453	0.894774161	0.906682759	0.914995472	0.922845879
14:53:16.224	0.985199922	1.06200732	0.882398329	0.879052236	0.879341216	0.87805032	0.905019299	0.897900339	0.897312195	0.896548017	0.893988431	0.890020603	0.897950716	0.896429991	0.894674583	0.906520889	0.914857902	0.922705641
14:53:17.088	0.985831783	1.070240473	0.882410262	0.87913957	0.879368977	0.878048828	0.90507218	0.897917977	0.897359708	0.896596093	0.894113686	0.890194585	0.898033887	0.896645679	0.895061911	0.907124324	0.915582581	0.923437268
14:53:17.952	0.983980147	1.059906793	0.882449652	0.878956077	0.879279955	0.877957019	0.904956065	0.897820919	0.897216031	0.896441756	0.893900461	0.889913539	0.897952365	0.896457058	0.894884951	0.907011496	0.915555759	0.923466463
14:53:18.816	0.983069351	1.072861857	0.882342608	0.878890842	0.879164424	0.877855248	0.90484689	0.89767793	0.897034938	0.896248778	0.893629917	0.889745564	0.897653299	0.896191664	0.894650325	0.906862021	0.915467314	0.923367728
14:53:19.680	0.980024255	1.063962038	0.882217214	0.878852248	0.879036117	0.877739473	0.904588983	0.897452088	0.896775316	0.895928176	0.893222288	0.88928592	0.897206638	0.895713129	0.894064664	0.906270483	0.9148829	0.922710476
14:53:21.408	0.985688891	1.062639912	0.882041032	0.878792578	0.879010587	0.87762207	0.904455102	0.897233165	0.896547832	0.895583012	0.892733067	0.888789664	0.896693006	0.895197299	0.893459728	0.90567358	0.914316296	0.922120092
14:53:22.272	0.986759684	1.05405043	0.882066039	0.87864407	0.878889163	0.877582215	0.904334805	0.897068368	0.896365803	0.895360536	0.892469786	0.888452743	0.896402982	0.894860793	0.893071034	0.905397754	0.914027523	0.921863724
14:53:23.136	0.987749059	1.059781653	0.882059212	0.878629129	0.878746429	0.877479281	0.904145689	0.896887287	0.896166429	0.895156508	0.892202091	0.888236451	0.896082957	0.89460585	0.892847158	0.905278527	0.913952066	0.921842381
14:53:24.000	0.987640333	1.064739753	0.88190012	0.878488548	0.878722259	0.87731708	0.904069339	0.896730729	0.895988832	0.894925093	0.89203314	0.887876542	0.895813833	0.894276087	0.892518354	0.90500159	0.913687865	0.921639813
14:53:24.864	0.984339392	1.052070902	0.881894193	0.878469183	0.878557647	0.877291454	0.903931291	0.896584965	0.895794501	0.89469318	0.891740073	0.887620719	0.895450573	0.894002003	0.892268784	0.904925096	0.913612592	0.92159522
14:53:25.728	0.983225874	1.060553085	0.881687335	0.878401669	0.878499757	0.87727745	0.903790059	0.896384004	0.895597783	0.894441568	0.891291889	0.887228644	0.895092135	0.893577112	0.891773383	0.904486759	0.9132253	0.921197038
14:53:26.592	0.988346357	1.068172682	0.881567827	0.878287409	0.878342883	0.877104948	0.90368342	0.896232207	0.895420164	0.894245166	0.891124576	0.88700828	0.894799643	0.893382804	0.891534781	0.904359967	0.913127951	0.921152732
14:53:28.320	0.981813457	1.058595989	0.881627526	0.87814288	0.878305134	0.877046555	0.903509498	0.896062906	0.895193132	0.893967404	0.890777457	0.88654388	0.894408666	0.89299413	0.891148397	0.903988694	0.912714347	0.920773232
14:53:29.184	0.983806868	1.059975204	0.881604808	0.878090825	0.878142421	0.877030348	0.90332958	0.895933385	0.895067708	0.89384904	0.890672687	0.886482023	0.894290324	0.892894897	0.890999118	0.903996718	0.912781989	0.920930264
14:53:30.048	0.982606533	1.057836103	0.881603636	0.878048698	0.878145324	0.876836443	0.903204147	0.895714332	0.894848519	0.893533191	0.890235974	0.885948272	0.893746026	0.892337858	0.89034116	0.903223566	0.911963642	0.920101512
14:53:30.912	0.986072945	1.060018377	0.881474801	0.877932515	0.878016115	0.876736995	0.903102365	0.89554827	0.894643986	0.893301153	0.889897393	0.885510445	0.89330557	0.891910841	0.889881788	0.902619265	0.91147452	0.919552799
14:53:31.776	0.982027198	1.059647913	0.881236203	0.877879593	0.877948469	0.876664399	0.902885848	0.895391155	0.894502113	0.893108735	0.889589194	0.8852452	0.893034449	0.891599784	0.889520707	0.902380472	0.911139453	0.919275328
14:53:32.640	0.983633563	1.059118301	0.881082563	0.87779375	0.877920602	0.876619407	0.902844151	0.89534114	0.894451635	0.89305332	0.889595073	0.88530854	0.893085523	0.891670947	0.889700208	0.902749363	0.911554333	0.919750932
14:53:33.504	0.986780497	1.067025435	0.881081541	0.877697126	0.877858221	0.876464355	0.902738817	0.895142553	0.89422512	0.892769785	0.889229765	0.884857698	0.892603286	0.891132603	0.88904992	0.901879324	0.910661292	0.918895603
14:53:34.368	0.988559612	1.057300498	0.880972231	0.87759385	0.877712044	0.876416355	0.902673448	0.8950091	0.894030357	0.892541917	0.888952419	0.884589175	0.892270079	0.890818942	0.888672515	0.901491039	0.910268846	0.918559495
14:53:36.096	0.985098652	1.0553139	0.880991567	0.877573803	0.877674741	0.876405762	0.902647339	0.894966267	0.894012026	0.892522382	0.888933618	0.884472537	0.892305846	0.890832801	0.888719989	0.901687161	0.910434821	0.918801561
14:53:36.960	0.987475877	1.046583849	0.880892943	0.877484798	0.877617655	0.876267606	0.902575237	0.894876176	0.893951416	0.892453711	0.888917822	0.884483928	0.892258415	0.890772167	0.888712314	0.901710774	0.910448034	0.918808482
14:53:37.824	0.986032593	1.054528698	0.880894629	0.877453401	0.877573836	0.876320026	0.902523954	0.894802114	0.893870715	0.892382503	0.88882788	0.884417865	0.892166178	0.890695779	0.888600169	0.901683392	0.910434114	0.918769754
14:53:38.688	0.981766609	1.063685256	0.880852891	0.877470481	0.877542771	0.876277878	0.902425706	0.894772945	0.89385491	0.892370006	0.888883471	0.88445354	0.892189774	0.890730979	0.888679119	0.901854306	0.910616539	0.918926442
14:53:39.552	0.983442377	1.049396045	0.880755987	0.877354452	0.877527661	0.876209508	0.902409658	0.894740699	0.893803742	0.892278334	0.888861863	0.88433939	0.892091437	0.890664429	0.888580804	0.901753259	0.910579127	0.918882127
14:53:40.416	0.98326123	1.066678279	0.880831909	0.877281703	0.877455122	0.876196722	0.902397382	0.894715228	0.893787292	0.892298251	0.888899141	0.884429736	0.892234721	0.890759169	0.888698683	0.901944304	0.910830585	0.919163909
14:53:41.280	0.9801437	1.063458453	0.880839458	0.877196783	0.877419301	0.876112694	0.902314019	0.894640268	0.893715011	0.892211366	0.888776314	0.884316126	0.892096471	0.890600756	0.888539469	0.9017571	0.910711007	0.91898901
14:53:42.144	0.979807617	1.055409353	0.880649628	0.877175742	0.877366924	0.87608754	0.902285504	0.894685049	0.893769096	0.892308781	0.888907326	0.884561133	0.892328993	0.890834571	0.888930603	0.902313391	0.911289709	0.919665057
14:53:43.872	0.980257662	1.052913827	0.880565076	0.877087642	0.877344338	0.876006459	0.902213583	0.89457352	0.893655063	0.892156115	0.888734576	0.884353399	0.892090991	0.890618633	0.888640688	0.90196066	0.911009688	0.919279557
14:53:44.736	0.982709916	1.060390293	0.880499687	0.877032593	0.877258926	0.875871534	0.902180167	0.894452218	0.893506097	0.891981354	0.888504535	0.884080081	0.891821286	0.890364653	0.888262411	0.901384591	0.910442611	0.918622164
14:53:45.600	0.977390389	1.064763863	0.880430306	0.87699614	0.877173538	0.875924769	0.902108491	0.89444128	0.893509865	0.892007255	0.888575559	0.884140047	0.891971856	0.890469575	0.88848195	0.901699634	0.910798666	0.91905521
14:53:46.464	0.97978313	1.06280128	0.880341069	0.876904815	0.877176357	0.875871827	0.902091742	0.894387024	0.893415556	0.891889931	0.888433908	0.883930029	0.891729315	0.890273898	0.88815916	0.901216139	0.910230092	0.918448474
14:53:47.328	0.982472648	1.058644598	0.880497427	0.876930927	0.877164169	0.87590081	0.902116149	0.894500232	0.893594272	0.892136818	0.888758655	0.884394265	0.892193124	0.890775425	0.888973797	0.902275026	0.911236663	0.919581266
14:53:48.192	0.981884075	1.058284979	0.880347687	0.876790383	0.87712618	0.87577653	0.902080982	0.894417583	0.893501527	0.891999423	0.888568885	0.884186394	0.89192366	0.890557252	0.888607263	0.901690737	0.910712179	0.919009913
14:53:49.056	0.981096109	1.059293543	0.880306237	0.876846523	0.877124703	0.87581781	0.901990522	0.894309123	0.893382534	0.891871636	0.888402605	0.884014613	0.891762691	0.890288619	0.888231902	0.901147671	0.910129614	0.918352078
14:53:50.784	0.982314522	1.063273301	0.880188601	0.876787396	0.877051792	0.875728857	0.901963906	0.894302609	0.893392271	0.891896155	0.888419815	0.884123505	0.891839395	0.89044131	0.888418226	0.901354337	0.910360571	0.918543646
14:53:51.648	0.980026227	1.048876189	0.880205865	0.876703601	0.876972995	0.875680266	0.902018563	0.894301413	0.893388627	0.891907936	0.888525088	0.884172851	0.891994674	0.890517189	0.888510462	0.901467069	0.910538841	0.918709263
14:53:52.512	0.978420476	1.05989118	0.880159613	0.876591209	0.876977056	0.875715479	0.901981893	0.894240999	0.893331256	0.891867916	0.888417899	0.884108244	0.891851783	0.890375923	0.888351224	0.901170114	0.910270421	0.91833074
14:53:53.376	0.980573365	1.061152963	0.880079292	0.876578055	0.877006016	0.875682824	0.902052871	0.894333553	0.893449989	0.892030719	0.888739813	0.88454343	0.892321409	0.890798508	0.888953327	0.901994335	0.91112493	0.91931318
14:53:54.240	0.982689108	1.060414327	0.880126852	0.876574359	0.876898174	0.875647797	0.901918927	0.894273239	0.893375193	0.89194245	0.888647911	0.884387074	0.892163016	0.890639598	0.888733343	0.901586939	0.910707205	0.918840963
14:53:55.104	0.978567372	1.046603946	0.879994329	0.876411972	0.876819354	0.875590608	0.901934048	0.894269476	0.893401528	0.891972606	0.888909639	0.884500187	0.892266892	0.89079171	0.888951603	0.901890307	0.910969069	0.919101952
14:53:55.968	0.978755545	1.050031968	0.880010038	0.87639761	0.876781516	0.875615056	0.901866161	0.89421134	0.893336103	0.891933137	0.88878405	0.884404735	0.892139463	0.890678177	0.888794691	0.901575975	0.910684103	0.918752109
14:53:56.832	0.979688792	1.062361031	0.879820823	0.876467822	0.876744109	0.875498781	0.90176222	0.894134362	0.893227378	0.891785174	0.888534681	0.884190721	0.891906476	0.890496335	0.888465253	0.901121044	0.910284261	0.918261574
14:53:58.560	0.98057838	1.058416007	0.879764642	0.876305738	0.876659925	0.875430009	0.901784033	0.894106057	0.893250496	0.891841443	0.888684727	0.88425375	0.892005839	0.89061618	0.888648348	0.901252211	0.910419464	0.918367945
14:53:59.424	0.980662148	1.059939648	0.879834078	0.87633202	0.876708134	0.875472099	0.901795672	0.894090988	0.893252854	0.891857855	0.888705234	0.884481415	0.892071454	0.890695363	0.88869557	0.901303132	0.910456725	0.918387612
14:54:00.288	0.983587939	1.047361021	0.87995143	0.876242431	0.876668777	0.875349339	0.901855746	0.894107199	0.893271146	0.891908006	0.888854751	0.884478832	0.892246317	0.89079794	0.888864978	0.901607875	0.910663732	0.918625832
14:55:15.456	0.973451312	1.018257499	0.875879134	0.872217952	0.874449671	0.872683269	0.901242036	0.893675387	0.893497794	0.893188351	0.89157773	0.888182899	0.897073897	0.89553605	0.894075636	0.904944609	0.912913305	0.920735419
14:55:17.184	0.971862188	1.044262287	0.876005708	0.872433125	0.874267493	0.872914206	0.901051516	0.893653147	0.89344575	0.893080425	0.891549134	0.888351143	0.896913454	0.895357849	0.893806087	0.904656825	0.912622215	0.920594705
14:55:18.048	0.975045291	1.053673074	0.875950275	0.872396132	0.874373535	0.872945584	0.901116724	0.893704467	0.893545451	0.893163037	0.891699673	0.888535532	0.897081685	0.89557454	0.89408582	0.905064825	0.912996858	0.921025945
14:55:18.912	0.97142816	1.041374434	0.875951416	0.872457763	0.874292739	0.872933237	0.901048168	0.893629644	0.893459116	0.893071355	0.891569655	0.88837685	0.896937581	0.895428751	0.893920262	0.904883893	0.912764529	0.920776839
14:55:19.776	0.969425748	1.044569822	0.875796695	0.872449662	0.874217157	0.872845151	0.900964706	0.893559235	0.89338982	0.893011309	0.891556733	0.888328516	0.896866472	0.895390965	0.893881648	0.904840904	0.912751272	0.920806164
14:55:20.640	0.96915275	1.049471184	0.875742424	0.872406353	0.874204242	0.87283743	0.901018676	0.893613025	0.893475954	0.893118875	0.891788354	0.88861316	0.89718196	0.895729372	0.89431457	0.905497203	0.913415781	0.921587057
14:55:21.504	0.967308225	1.037053419	0.875687146	0.872293081	0.874153047	0.872823992	0.900924741	0.893515891	0.893342703	0.892989995	0.891503225	0.888404399	0.896905881	0.895399661	0.893840974	0.904768545	0.912653791	0.920599491
14:55:22.368	0.974015649	1.04315717	0.875795038	0.872345587	0.874147988	0.872757834	0.901058878	0.893566036	0.893422656	0.893088386	0.891710849	0.888520266	0.897067585	0.895611881	0.894110925	0.905060508	0.912954794	0.920918606
14:55:23.232	0.975203812	1.043673973	0.875807478	0.872252783	0.874158753	0.872727483	0.900964041	0.893563382	0.893396391	0.893064681	0.891739732	0.888508947	0.897005353	0.89555014	0.893901247	0.904657173	0.912540481	0.92039785
14:55:24.960	0.96834132	1.04833177	0.875464799	0.872190171	0.874192833	0.872845519	0.901053991	0.893695606	0.893568646	0.89327578	0.892117722	0.88883833	0.897464652	0.895975604	0.894510791	0.905262845	0.913093328	0.921079345
14:55:25.824	0.972833715	1.04587969	0.875756088	0.87223884	0.874127681	0.872796907	0.901103439	0.893719975	0.893644529	0.893341738	0.892278613	0.888925114	0.897532954	0.896101129	0.894602389	0.90517437	0.912938941	0.920955289
14:55:26.688	0.972149162	1.044272833	0.87559805	0.872197996	0.874167008	0.872833172	0.901131377	0.893838052	0.893726068	0.893520024	0.892551962	0.88912385	0.897800342	0.896394407	0.894846049	0.905397194	0.913096932	0.921155908
14:55:27.552	0.971020678	1.045689474	0.875583406	0.872184521	0.874188954	0.872783346	0.90117294	0.893909733	0.893815604	0.893648336	0.892626825	0.889286892	0.898079699	0.896586109	0.895005468	0.905422105	0.913067053	0.921155792
14:55:28.416	0.972265634	1.043675976	0.875594115	0.872131877	0.874164968	0.872801672	0.90127334	0.893972065	0.893900536	0.893763815	0.892716844	0.889305349	0.898185837	0.896735206	0.895012039	0.905323781	0.912850169	0.920915762
14:55:29.280	0.9736551	1.040584029	0.875544387	0.872072425	0.874248869	0.872887828	0.901349184	0.894089204	0.894034704	0.893928192	0.892893811	0.889690686	0.898451827	0.897017986	0.895356149	0.905568536	0.912984813	0.9210795
14:55:30.144	0.97068892	1.040080481	0.875583702	0.872067665	0.874196158	0.872838535	0.90141154	0.894127679	0.894084221	0.894028352	0.893024593	0.889839296	0.898611273	0.89711296	0.895402988	0.905426101	0.912798331	0.920847627
14:55:31.008	0.971496769	1.041570793	0.875573742	0.872064844	0.874216859	0.872808199	0.901468184	0.894265262	0.894218959	0.894162213	0.89319386	0.890052775	0.898946295	0.897369638	0.895763142	0.905781238	0.913137334	0.921215912
14:55:32.736	0.967570533	1.043370753	0.875581355	0.872009274	0.87424174	0.872849207	0.901632995	0.894307513	0.89430994	0.894343501	0.893497224	0.890411638	0.899291942	0.897645918	0.896133357	0.906067164	0.913457632	0.921507222
14:55:33.600	0.969917941	1.041920025	0.875515469	0.872009464	0.874179247	0.872831021	0.901610304	0.894334683	0.894346953	0.894385174	0.893602087	0.89050244	0.899376644	0.897726106	0.896246335	0.906081742	0.91345422	0.921490003
14:55:34.464	0.973110143	1.05022263	0.875366992	0.871923967	0.874175556	0.872782613	0.90159126	0.894342748	0.894425453	0.8944618	0.893745616	0.890615532	0.899588446	0.897915697	0.896351176	0.90624262	0.91367467	0.921729282
14:55:35.328	0.970662142	1.04711022	0.875385659	0.871993103	0.874159705	0.872832543	0.901549537	0.894336452	0.894367647	0.894465289	0.893725066	0.890499155	0.899627374	0.897930736	0.896277659	0.906149133	0.913602996	0.921569908
14:55:36.192	0.972829127	1.043779865	0.875378778	0.871915741	0.874111541	0.872800808	0.901539821	0.894329472	0.894386328	0.894444576	0.8936629	0.89054896	0.899622644	0.897980553	0.896358851	0.906275874	0.913760491	0.921676762
14:55:37.056	0.97242961	1.047083002	0.875290961	0.87188222	0.874097621	0.872820186	0.901548721	0.894363618	0.894389683	0.894473101	0.893739544	0.890666564	0.89975987	0.898104761	0.896604297	0.906665439	0.91422699	0.92212991
14:55:37.920	0.973386892	1.036271257	0.875262617	0.87183269	0.874037351	0.872624951	0.901457596	0.89421283	0.894264764	0.894333585	0.893553233	0.890430357	0.899562624	0.897898909	0.896375938	0.906467339	0.914133213	0.921946209
14:55:39.648	0.972602312	1.035627039	0.875139494	0.871705541	0.874030535	0.87266312	0.901376275	0.894121146	0.894166632	0.894184842	0.893381374	0.890260155	0.899344166	0.897684295	0.896234369	0.906332195	0.914060069	0.921848634
14:55:40.512	0.970701075	1.040238324	0.875289776	0.871633779	0.873923806	0.872557298	0.901229999	0.893979012	0.894035442	0.894027667	0.893171412	0.890014744	0.899163829	0.897517437	0.896029023	0.90629045	0.914054679	0.92183377
14:55:41.376	0.968622995	1.045602351	0.875196991	0.871577643	0.873783197	0.872457553	0.901072682	0.893832468	0.893844449	0.893751847	0.892871385	0.889679569	0.898889576	0.897108196	0.895541486	0.905795476	0.913648775	0.921407196
14:55:42.240	0.967376173	1.032694044	0.875136072	0.871537388	0.873716956	0.872393109	0.901066405	0.893710779	0.89371422	0.893585926	0.892718602	0.889497913	0.89867206	0.896951966	0.895465636	0.905879727	0.913716774	0.921517836
14:55:43.104	0.967335606	1.043542646	0.874985863	0.871392999	0.873713931	0.87233631	0.900881432	0.893525281	0.893494509	0.893329294	0.892366939	0.889132557	0.898222351	0.896529093	0.894966691	0.905330895	0.913205342	0.921029036
14:55:43.968	0.973487401	1.042072355	0.874869772	0.871391255	0.873582728	0.87230218	0.900732789	0.893391255	0.893389958	0.893187816	0.892275831	0.888969831	0.898028384	0.896375792	0.894834909	0.905348075	0.913180706	0.920999187
14:55:44.832	0.970423098	1.048104952	0.874787582	0.871317984	0.87349915	0.872229597	0.900609643	0.893302289	0.893229779	0.893018293	0.89200175	0.88874927	0.897778388	0.896176201	0.894659409	0.905223485	0.913083555	0.920948386
14:55:45.696	0.967572948	1.041440166	0.874736236	0.871291939	0.873451695	0.872094493	0.900592563	0.893206594	0.893105839	0.892905171	0.891908326	0.888632036	0.897706008	0.89601921	0.894533422	0.905165525	0.913005378	0.920907536
14:55:47.424	0.970780594	1.04222535	0.874713354	0.871227115	0.873428301	0.872006586	0.900512573	0.893032695	0.892957846	0.892704471	0.891708109	0.888342695	0.897480359	0.895764469	0.894258537	0.90499832	0.912813481	0.920784335
14:55:48.288	0.972173742	1.035885647	0.874620157	0.871120498	0.873351527	0.872039993	0.900371051	0.89294829	0.892851604	0.892586747	0.891511767	0.888262582	0.897310701	0.895611709	0.894158663	0.904989107	0.912828854	0.920817635
14:55:49.152	0.967315422	1.048053234	0.874650658	0.871029226	0.873302785	0.871946005	0.900254037	0.892818566	0.892710144	0.892407953	0.891272165	0.887982003	0.897026976	0.895364719	0.893872813	0.904694644	0.912535362	0.920515845
14:55:50.016	0.968907209	1.047614104	0.874650775	0.870994149	0.873284917	0.87195082	0.900297589	0.892873512	0.892798331	0.892526276	0.891460417	0.888191327	0.897423723	0.895660643	0.894427359	0.905412222	0.913348212	0.921460862
14:55:50.880	0.968053414	1.035860526	0.87447564	0.871017289	0.87323191	0.871893193	0.90028792	0.892855238	0.892767414	0.89248966	0.891440514	0.888187024	0.897395045	0.895652851	0.894358812	0.905368516	0.913323644	0.921392867
14:55:51.744	0.969354989	1.040399411	0.87456619	0.87092098	0.873262705	0.871944076	0.900232766	0.89281903	0.892702143	0.892437643	0.891294107	0.888046664	0.897179944	0.895482175	0.894104438	0.904917962	0.912927352	0.920844115
14:55:52.608	0.968526346	1.0381302	0.874458689	0.870915876	0.873215155	0.871850154	0.900307743	0.892914028	0.892810708	0.892583813	0.891392011	0.888199208	0.897427078	0.895699562	0.894351427	0.905131752	0.913157948	0.921025238
14:55:53.472	0.96636268	1.03915452	0.874486452	0.870937152	0.873270611	0.871877434	0.900453191	0.893000176	0.892938801	0.892767298	0.891664079	0.888496704	0.897741458	0.896010211	0.894653212	0.905363232	0.913400013	0.921229597
14:55:55.200	0.969380948	1.032185214	0.874415266	0.870911532	0.873275036	0.871950299	0.900575714	0.893156507	0.893115374	0.893015397	0.891966059	0.888908595	0.898107575	0.896414354	0.89504181	0.905661923	0.913681645	0.921415452
14:55:56.064	0.97014645	1.035319217	0.874461268	0.870922734	0.873359825	0.872020619	0.900757345	0.89336603	0.893397989	0.893382859	0.892473107	0.889514563	0.898753086	0.897024113	0.895736467	0.906374713	0.914354655	0.922000669
14:55:56.928	0.968663194	1.039966264	0.874435431	0.870915232	0.873406224	0.872105802	0.900870037	0.893545145	0.893610063	0.893643886	0.892830133	0.889885683	0.899121882	0.897387227	0.896075394	0.90640384	0.914413031	0.921968552
14:55:57.792	0.971809352	1.043295317	0.874375509	0.870912534	0.873451881	0.872075936	0.901027974	0.893729537	0.893813704	0.893911711	0.893242357	0.890404758	0.899539635	0.897869068	0.896553961	0.906751196	0.91478621	0.92230226
14:55:58.656	0.969693466	1.045433128	0.874353103	0.87092907	0.873450715	0.872079012	0.901151976	0.893876064	0.8940463	0.894188357	0.89358797	0.890853481	0.899976188	0.898259857	0.896943454	0.907119715	0.914998112	0.922521014
14:55:59.520	0.970030716	1.034770677	0.874511628	0.870896577	0.873504981	0.872148156	0.901254425	0.894010695	0.894167525	0.894362615	0.893699291	0.890993	0.900237262	0.898543074	0.897121185	0.907130074	0.91501532	0.922437424
14:57:15.552	0.964650302	1.02899389	0.871841481	0.868367362	0.872238363	0.870736107	0.90146078	0.894349989	0.89453201	0.895409389	0.895871518	0.893479285	0.903095322	0.901383979	0.899927634	0.908262431	0.915945363	0.923050823
14:57:16.416	0.962485758	1.036054613	0.87162105	0.868312256	0.872208196	0.870800329	0.901410778	0.894316284	0.894508806	0.895399366	0.895818806	0.893625133	0.903313955	0.901477288	0.900044081	0.908509304	0.916173869	0.923237712
14:57:17.280	0.958370236	1.041169765	0.871717959	0.868247088	0.872186233	0.870674881	0.901322229	0.894191888	0.894340326	0.895143834	0.895556694	0.893178145	0.902841542	0.901005883	0.899444087	0.90778161	0.915539964	0.922417579
14:57:18.144	0.955876978	1.035274651	0.871704842	0.868247694	0.872160866	0.870771419	0.9012494	0.894148863	0.894299905	0.895081375	0.895370022	0.893134292	0.902819613	0.900961228	0.899450773	0.907922483	0.915688104	0.922598275
14:57:19.008	0.958904342	1.036267331	0.871711282	0.868286117	0.872174558	0.87074095	0.90127654	0.89417943	0.894352607	0.895183666	0.895626593	0.893342684	0.903085659	0.901234138	0.899942253	0.908730737	0.91645914	0.92361662
14:57:19.872	0.962033088	1.029230945	0.871616858	0.868233987	0.872146255	0.870708605	0.901290208	0.894090598	0.894267636	0.895073926	0.895479395	0.893251552	0.902917835	0.901119367	0.899837598	0.908651015	0.9163461	0.923561508
14:57:20.736	0.962674619	1.021224417	0.871629983	0.868158177	0.872064494	0.870608769	0.901098245	0.89393096	0.894078569	0.894830011	0.895142378	0.89274242	0.902506971	0.900679504	0.89921999	0.907881589	0.91553063	0.922697399
14:57:22.464	0.961992263	1.02984179	0.871479437	0.868043052	0.872004311	0.870650101	0.901090069	0.893912423	0.894038938	0.894791791	0.895078489	0.892732305	0.902457017	0.900598199	0.899127284	0.907792458	0.915416712	0.922612247
14:57:23.328	0.960538254	1.036771701	0.871629796	0.868113152	0.872040564	0.870638618	0.90115438	0.893979567	0.894124011	0.894887466	0.895202641	0.892819227	0.902581392	0.900797166	0.899326487	0.907934978	0.915591642	0.92281285
14:57:24.192	0.960162236	1.032546059	0.871538201	0.868022003	0.872003817	0.870621698	0.901113725	0.893931478	0.89405345	0.894791183	0.895064745	0.892667998	0.902330499	0.900518215	0.898896832	0.907258585	0.914863447	0.921895362
14:57:25.056	0.959986913	1.027966785	0.871649768	0.868019654	0.872064982	0.870742126	0.9014045	0.894154805	0.894271554	0.895113118	0.895561137	0.89313819	0.902850389	0.901127426	0.899609104	0.908114133	0.915754613	0.922882962
14:57:25.920	0.960056903	1.031204935	0.871653975	0.86808698	0.872084505	0.870690451	0.901520953	0.894316466	0.894504834	0.895379578	0.895922125	0.893611576	0.903324988	0.901610691	0.900311366	0.90878035	0.91652785	0.923614633
14:57:26.784	0.958371823	1.028422662	0.871527053	0.868114575	0.872213046	0.870800295	0.901533145	0.8944382	0.894632658	0.895555727	0.896140535	0.894003593	0.903613607	0.901913529	0.900566002	0.908983374	0.916733587	0.923739292
14:57:27.648	0.962594702	1.03324982	0.871571627	0.868061623	0.872161488	0.870824641	0.901567806	0.894436344	0.894621692	0.895570517	0.896190442	0.893941179	0.903534694	0.901844495	0.90040545	0.908655891	0.916364957	0.923348586
14:57:28.512	0.96212453	1.03175395	0.871589144	0.868067515	0.872190562	0.870876876	0.901653199	0.894542459	0.89477273	0.895740057	0.896333832	0.894292734	0.903803885	0.9021246	0.900684212	0.908920381	0.916652655	0.923548243
14:57:30.240	0.9593949	1.031827395	0.87164218	0.868140996	0.872306084	0.870760938	0.901770941	0.894703904	0.894979023	0.895989511	0.896668948	0.894666634	0.904240335	0.90252291	0.901099509	0.909431858	0.917142639	0.924015057
14:57:31.104	0.960977776	1.037158422	0.871664869	0.868149055	0.872266469	0.870947239	0.901926711	0.894808827	0.895069494	0.896137321	0.896826453	0.894900257	0.904477845	0.902777887	0.901346336	0.90960221	0.917241352	0.924126732
14:57:31.968	0.96149048	1.022806785	0.871607848	0.868009526	0.872283223	0.870817008	0.901837576	0.894810174	0.895067083	0.896139252	0.896804259	0.894862836	0.904477629	0.902755191	0.901198919	0.909165506	0.916777801	0.92359782
14:57:32.832	0.961002878	1.036988588	0.871606491	0.868039782	0.872253472	0.870914614	0.901989354	0.894946476	0.895232895	0.896359163	0.897027589	0.895172137	0.904885996	0.903090515	0.901646058	0.909661037	0.917223505	0.924102367
14:57:33.696	0.961466926	1.031260377	0.871609109	0.868058919	0.872323926	0.870918684	0.902059471	0.895002981	0.895314482	0.896431723	0.897089802	0.895241036	0.904975578	0.903254014	0.901794062	0.909766538	0.917294714	0.924183585
14:57:34.560	0.959665609	1.01928172	0.871499292	0.868114897	0.872404075	0.870966335	0.902098467	0.895115161	0.895424752	0.89659786	0.89737376	0.895460329	0.905221395	0.903554491	0.902206763	0.910315318	0.917891615	0.924709741
14:57:35.424	0.963397239	1.029029834	0.871531856	0.868022863	0.872356869	0.870952918	0.902090078	0.895065591	0.89536594	0.896548752	0.897330435	0.895297673	0.905065536	0.90345922	0.902024969	0.910076016	0.917704285	0.924452258
14:57:36.288	0.956038409	1.031087365	0.871559069	0.867971636	0.872319383	0.870896884	0.902044809	0.895066761	0.895345072	0.896517507	0.897316127	0.895329564	0.905076912	0.903480226	0.902044112	0.910271966	0.917904543	0.924634721
14:57:38.016	0.95996647	1.033715959	0.871612767	0.867989825	0.872301015	0.870899787	0.902112189	0.895039426	0.895294325	0.896472751	0.897330528	0.895312705	0.905018569	0.903422624	0.902066817	0.910355718	0.918052718	0.924779129
14:57:38.880	0.958880506	1.031981746	0.871460498	0.868015263	0.872296962	0.870857927	0.902027015	0.894998064	0.895258693	0.896430097	0.897232653	0.895271101	0.905006517	0.903374885	0.902113882	0.910495932	0.918238715	0.925031034
14:57:39.744	0.960371353	1.03010343	0.871449126	0.867951591	0.872220269	0.870788887	0.901884657	0.894863907	0.895079549	0.896201284	0.896958183	0.894889915	0.904662851	0.902981191	0.901620162	0.910010878	0.917803298	0.924510396
14:57:40.608	0.958300908	1.032732704	0.871499096	0.867831827	0.872133872	0.870739633	0.90182917	0.894741923	0.894989908	0.896072768	0.896792032	0.894820499	0.904518079	0.902840128	0.901523442	0.909950159	0.917882818	0.924579707
14:57:41.472	0.958053948	1.032607282	0.871317944	0.86771377	0.87206166	0.870679474	0.901727265	0.894553381	0.894770933	0.895776526	0.896416722	0.894237394	0.903972788	0.902315501	0.900820631	0.909172094	0.917085104	0.923667919
14:57:42.336	0.960383443	1.02415784	0.871324504	0.86778469	0.872050867	0.870585471	0.901732644	0.894554286	0.894779138	0.895788652	0.896506805	0.894370381	0.904040224	0.90245437	0.901046314	0.909572554	0.917629366	0.924223787
14:57:43.200	0.961131634	1.026343366	0.871251392	0.867767549	0.872010125	0.870555641	0.901624318	0.894470454	0.89463819	0.895676457	0.896344042	0.894203614	0.90387024	0.902290382	0.900893258	0.909492068	0.917602176	0.924207735
14:57:44.928	0.960045309	1.035113443	0.871112881	0.867674811	0.871912578	0.870616449	0.90151109	0.894392414	0.894550051	0.89556118	0.896223736	0.894044383	0.903763806	0.902171503	0.900813161	0.909462443	0.917603412	0.924184542
14:57:45.792	0.959845511	1.026508684	0.871176585	0.867624408	0.871969864	0.870486843	0.901462117	0.894327195	0.894471745	0.895435423	0.896020567	0.893871695	0.903537634	0.901991849	0.900558237	0.909216086	0.91746404	0.923963535
14:57:46.656	0.95811812	1.029368639	0.871161375	0.867556664	0.871862469	0.870443518	0.901355504	0.894192668	0.894306873	0.895224068	0.895801465	0.893566492	0.903205333	0.90159538	0.900066952	0.908637355	0.916873712	0.923317062
14:57:47.520	0.958872638	1.026288191	0.871265069	0.867533616	0.87181795	0.870458753	0.901269659	0.894067225	0.894179927	0.895091331	0.895657022	0.89334003	0.90301765	0.901422807	0.899901767	0.908462178	0.916765029	0.923173584
14:57:48.384	0.960104143	1.03042205	0.870943875	0.867514597	0.871783764	0.870386595	0.901218056	0.894031118	0.894099936	0.895011258	0.895555591	0.893272138	0.902858478	0.901309248	0.899814787	0.908417399	0.916795353	0.923195971
14:57:49.248	0.956114224	1.035358588	0.871066897	0.867421331	0.871732396	0.870287456	0.901141063	0.893921213	0.893992336	0.894881437	0.895437955	0.893100397	0.902787664	0.90118375	0.899712104	0.908398905	0.916822025	0.923224934
14:57:50.112	0.958170028	1.023263551	0.870945128	0.867398054	0.871667699	0.8703266	0.901164063	0.893869999	0.893927287	0.894819636	0.895454325	0.893065648	0.902758707	0.901122711	0.899740063	0.908552629	0.91703183	0.923490682
14:57:50.976	0.958383621	1.031863762	0.870770049	0.867310841	0.871646412	0.870190106	0.901086128	0.893792377	0.89385314	0.894726341	0.895313499	0.892975365	0.902672063	0.900988997	0.899652483	0.908508966	0.916966821	0.923429392
14:57:52.704	0.95436443	1.026068933	0.870843206	0.867274945	0.871546237	0.870115467	0.900979322	0.893648969	0.893663901	0.894472617	0.895030071	0.892604084	0.902340435	0.900646111	0.899283156	0.908256364	0.91672146	0.923226435
14:57:53.568	0.95753436	1.032099976	0.870812151	0.867263783	0.871532327	0.870101071	0.900838055	0.89353771	0.893544188	0.894341859	0.894786988	0.892495118	0.902208724	0.900550754	0.899255875	0.908387172	0.916865448	0.923501675
14:57:54.432	0.96382755	1.028319799	0.870898015	0.867160749	0.871485346	0.869969322	0.900632849	0.893344162	0.893288384	0.89401951	0.894456048	0.892059988	0.901706714	0.900026881	0.898675978	0.907844528	0.916324871	0.922971298
14:57:55.296	0.959374695	1.030012489	0.870640556	0.867112234	0.871359863	0.86990649	0.900482476	0.893177712	0.893087319	0.893748329	0.894098602	0.891624249	0.90127937	0.899641669	0.898211667	0.907470407	0.915900517	0.922573246
14:57:56.160	0.954983102	1.02911602	0.870649218	0.867097058	0.871307499	0.869862774	0.900433667	0.893051275	0.892940777	0.893554593	0.893867877	0.891367802	0.900972265	0.89937762	0.897927694	0.907239553	0.915678904	0.922328576
14:57:57.024	0.957898575	1.020027886	0.870515956	0.867052021	0.871278469	0.869820373	0.900347537	0.89292487	0.892802446	0.89340192	0.893613306	0.891124415	0.900740167	0.899170183	0.897704291	0.906985776	0.915544379	0.922246072
14:57:57.888	0.959199029	1.02139818	0.870543931	0.866955214	0.871239707	0.869731782	0.900277944	0.89287617	0.892721469	0.893319393	0.893563754	0.891020134	0.900687353	0.899109236	0.897654874	0.907066794	0.915660643	0.922354223
14:57:58.752	0.956122687	1.03048049	0.870448539	0.866869497	0.87115911	0.869608698	0.900174595	0.892753908	0.892563907	0.89310595	0.893229604	0.890702604	0.900354402	0.898727112	0.897289958	0.906652853	0.915240426	0.921880009
14:58:00.480	0.956137618	1.025278724	0.870427893	0.86680002	0.871101831	0.869618068	0.900120904	0.892656591	0.892486841	0.89301968	0.89329283	0.890688893	0.900299464	0.898658612	0.897230889	0.906741397	0.915381953	0.922110368
14:59:15.648	0.94754202	1.047524719	0.868517329	0.865045604	0.870195964	0.868853275	0.899731591	0.892117508	0.891403555	0.89195777	0.892298174	0.889717099	0.900021814	0.897975074	0.896365067	0.905583617	0.914476648	0.920747399
14:59:17.376	0.953909213	1.018132524	0.868918875	0.865242112	0.870359009	0.868917125	0.899984978	0.892304459	0.891798121	0.892461335	0.89275358	0.890683026	0.900712297	0.898850283	0.897387389	0.906703107	0.915416787	0.921845479
14:59:18.240	0.954548385	1.025111367	0.869155801	0.865407148	0.870625184	0.869135656	0.900447323	0.892753662	0.89230168	0.893070059	0.89353142	0.891628967	0.90147207	0.899717044	0.89825116	0.907283224	0.915968479	0.922359045
14:59:19.104	0.953487168	1.018590259	0.869100914	0.865424369	0.870671569	0.869242239	0.900564626	0.892987908	0.892575616	0.893395833	0.894016277	0.891992327	0.901878481	0.900165259	0.898683723	0.907408523	0.91609848	0.922361298
14:59:19.968	0.95095364	1.019081285	0.869236235	0.865455168	0.87078816	0.869320233	0.900897592	0.893320768	0.892941471	0.893873543	0.894598693	0.8925202	0.902669441	0.900856631	0.899369342	0.908001199	0.916636081	0.922826068
14:59:20.832	0.948855047	1.017081074	0.869028324	0.865586865	0.870900203	0.869465353	0.901170632	0.893646117	0.893323582	0.894361067	0.895293275	0.893279401	0.90340864	0.901636298	0.900151022	0.90851941	0.917080896	0.923198671
14:59:21.696	0.952231825	1.01728645	0.869274405	0.865634427	0.871135792	0.8696173	0.901516008	0.89409193	0.893827123	0.895026247	0.896111929	0.894319151	0.90449604	0.90266185	0.901325313	0.909618722	0.918166713	0.924384329
14:59:22.560	0.953749767	1.025573345	0.869346276	0.865701877	0.871190076	0.869770511	0.901773612	0.894426083	0.894190982	0.895472256	0.896694339	0.894864833	0.904975977	0.903321838	0.901976384	0.909913095	0.9184214	0.924493515
14:59:23.424	0.954032047	1.019620251	0.869553822	0.865798164	0.871297888	0.869857119	0.902011322	0.89466413	0.894494907	0.895857083	0.897096576	0.89534192	0.905513282	0.903825906	0.902400171	0.910108649	0.918502708	0.924465485
14:59:25.152	0.950084056	1.022738901	0.86967816	0.86583395	0.871486547	0.869956125	0.902234821	0.89500906	0.894841577	0.896304344	0.897657091	0.895842776	0.906176079	0.904453549	0.902957689	0.910394349	0.918726967	0.924615909
14:59:26.016	0.953009542	1.02763085	0.869500009	0.865857169	0.871566035	0.870122438	0.902458848	0.895322697	0.895190655	0.896734861	0.898118115	0.896379904	0.906628456	0.905044797	0.903406064	0.910731937	0.918908685	0.924708558
14:59:26.880	0.950451496	1.021429466	0.869707883	0.865934721	0.871661954	0.870230142	0.90274211	0.895582671	0.895500944	0.897179033	0.898671983	0.897114742	0.907406393	0.905744393	0.904170383	0.911307415	0.919482729	0.925238726
14:59:27.744	0.949543592	1.018954391	0.869542358	0.865975982	0.871779715	0.870382487	0.903062528	0.895912037	0.895866097	0.897623541	0.899283711	0.897799486	0.908219509	0.906440972	0.905045427	0.912071987	0.920212513	0.925942782
14:59:28.608	0.952109146	1.016763905	0.869617241	0.865996266	0.871912774	0.870395818	0.903218847	0.896098218	0.896125317	0.897940053	0.899603263	0.898286601	0.908545524	0.90690934	0.905401894	0.912330626	0.92048969	0.926191617
14:59:29.472	0.95287464	1.022235628	0.869644224	0.866062111	0.871897005	0.870561187	0.903318063	0.896242411	0.896284562	0.898145453	0.899908419	0.898494112	0.908869312	0.907231304	0.905785098	0.912594447	0.920693371	0.926329935
14:59:30.336	0.951264892	1.022242771	0.869687517	0.866069691	0.871949856	0.870579487	0.903374201	0.896335597	0.896349015	0.89822205	0.899941695	0.898606834	0.908932881	0.907305522	0.905774853	0.912457401	0.920571888	0.926141903
14:59:32.064	0.948526803	1.019892846	0.869638382	0.866060564	0.871888694	0.870434941	0.903407941	0.896315118	0.896352516	0.898220325	0.899885332	0.898601095	0.908851181	0.90722296	0.90569106	0.912239358	0.920313412	0.925869281
14:59:32.928	0.952875954	1.01384379	0.869564674	0.866020876	0.871977199	0.87048665	0.903451729	0.896396987	0.896420312	0.898327455	0.900084643	0.89871957	0.909128591	0.907403031	0.905896638	0.912441432	0.920602994	0.926067775
14:59:33.792	0.952528069	1.020741607	0.869645135	0.865971986	0.872017803	0.870569474	0.903530929	0.89651108	0.896495203	0.898438298	0.900216094	0.898874271	0.909293731	0.907601662	0.906211467	0.912735429	0.920931219	0.926387739
14:59:34.656	0.951186	1.012721444	0.869627615	0.866056913	0.871963724	0.870606414	0.903565938	0.896456166	0.896432203	0.898363242	0.900125213	0.898758969	0.909152258	0.907510971	0.905981954	0.912417342	0.920605918	0.926006888
14:59:35.520	0.95141919	1.013518554	0.869587765	0.866050679	0.87199733	0.870550464	0.903538726	0.89645642	0.896432371	0.898360124	0.900143498	0.898774587	0.909164378	0.907565584	0.906034107	0.912436374	0.920609022	0.926043535
14:59:36.384	0.952182477	1.020200091	0.86966694	0.866037541	0.872025072	0.870518489	0.90357138	0.896495207	0.896429854	0.898373053	0.900165187	0.898780928	0.909167476	0.907638961	0.906108556	0.912536551	0.920712664	0.926127108
14:59:37.248	0.952619087	1.018402708	0.869623703	0.865998375	0.872025932	0.870600192	0.903590894	0.896562962	0.896563236	0.898532376	0.900464268	0.899166573	0.909529994	0.907958604	0.906536001	0.913240849	0.921346125	0.926837443
14:59:38.112	0.952889565	1.026437593	0.869658862	0.866034386	0.872086911	0.870611987	0.903629885	0.896589152	0.896601483	0.898556401	0.900441811	0.899177159	0.909562271	0.90794212	0.906531898	0.913117485	0.921330106	0.926784932
14:59:39.840	0.953177587	1.023077307	0.869539938	0.866068699	0.872058707	0.870588747	0.903568797	0.8965455	0.896542027	0.898498834	0.900342641	0.898985277	0.909468734	0.907840916	0.906283409	0.912737769	0.920919966	0.926305194
14:59:40.704	0.950582807	1.016377166	0.869692623	0.866142452	0.872044225	0.870649136	0.903668369	0.896611674	0.896615623	0.898608018	0.900510694	0.899328862	0.909690412	0.908096639	0.906599953	0.91305044	0.921284242	0.926650143
14:59:41.568	0.950813592	1.013202739	0.869664226	0.866000641	0.872074224	0.870589909	0.903666648	0.896594887	0.896605505	0.898561033	0.900395407	0.899270349	0.909663096	0.907941666	0.906356536	0.912671167	0.920858362	0.926186485
14:59:42.432	0.948844299	1.020321993	0.869547723	0.86594374	0.872100879	0.870678095	0.90370198	0.896694873	0.896717987	0.898696167	0.900636399	0.899503247	0.90996836	0.908240963	0.906798842	0.913124212	0.921289725	0.926651474
14:59:43.296	0.95378742	1.012881312	0.869617267	0.865950678	0.872058301	0.870563338	0.903716636	0.896614391	0.896616155	0.898601902	0.900451149	0.899404115	0.909770253	0.908022359	0.906498393	0.912632637	0.920829789	0.926135214
14:59:44.160	0.951817418	1.022158754	0.869534776	0.866019242	0.872046801	0.870506341	0.903648002	0.896601023	0.896562254	0.898546868	0.900456647	0.899319674	0.909721435	0.907975451	0.906418373	0.912574577	0.920775024	0.926067376
14:59:45.024	0.952901418	1.018615971	0.869380273	0.865972111	0.872019576	0.870537914	0.903639934	0.896569892	0.896527735	0.898507522	0.900446764	0.899292907	0.909675351	0.907949552	0.906511049	0.912856061	0.921092775	0.92643785
14:59:45.888	0.949872347	1.022380523	0.86939034	0.865929888	0.871916055	0.87044639	0.903453852	0.896364103	0.896268239	0.898185438	0.900002608	0.898808719	0.909137161	0.907446614	0.905858218	0.912230103	0.920453558	0.925766994
14:59:47.616	0.948257189	1.017277483	0.869433188	0.86585381	0.871907794	0.870294598	0.90328177	0.896221963	0.896081377	0.897964156	0.899680878	0.898453023	0.90884832	0.907135027	0.905559187	0.912033145	0.920423363	0.925723832
14:59:48.480	0.950143618	1.01827423	0.869390084	0.865791692	0.871815711	0.870301167	0.903157708	0.896026444	0.895862954	0.897703767	0.899354158	0.898096654	0.9085263	0.906806863	0.905252326	0.91195467	0.920418413	0.925702537
14:59:49.344	0.951046979	1.013292064	0.869346379	0.8656949	0.871702611	0.870295955	0.902927935	0.895689936	0.895525149	0.897256214	0.898797026	0.897462718	0.907753959	0.906137429	0.904535542	0.911266832	0.919813498	0.925072076
14:59:50.208	0.948964047	1.017618482	0.869426905	0.865587205	0.871565956	0.870190339	0.902712243	0.895475839	0.895225046	0.896892944	0.898383969	0.896969978	0.907287536	0.905629387	0.904064988	0.911015565	0.919604208	0.924876002
14:59:51.072	0.952390052	1.022218423	0.869265632	0.865528389	0.871425806	0.870071479	0.902512107	0.895256358	0.894947773	0.896565919	0.897989931	0.896389385	0.906818302	0.905199626	0.903640251	0.910719722	0.919380831	0.924656354
14:59:51.936	0.950499136	1.018629999	0.869041826	0.865428154	0.87133309	0.869920543	0.9023795	0.89501731	0.89468844	0.896272892	0.897645915	0.895957719	0.906305783	0.904793164	0.903284031	0.910500408	0.919230556	0.924546327
14:59:52.800	0.951110085	1.02129876	0.869146079	0.865328123	0.871261328	0.869754641	0.902154125	0.894797143	0.894421583	0.895922365	0.897244728	0.89558926	0.905892045	0.904326477	0.902805091	0.910175139	0.918974973	0.92430761
14:59:54.528	0.951266928	1.015347896	0.869184811	0.865279514	0.871148215	0.869660463	0.902001277	0.894560377	0.894179921	0.895635512	0.896951176	0.895172256	0.90545525	0.903889915	0.90240555	0.909738868	0.918600465	0.923947701
14:59:55.392	0.94872875	1.018183455	0.869116791	0.865219166	0.871135443	0.869647042	0.901872498	0.894423771	0.89398487	0.895385967	0.896616982	0.894826495	0.905125814	0.903568884	0.902011332	0.909533727	0.9183392	0.923778862
14:59:56.256	0.950043012	1.018189855	0.868994617	0.865189524	0.871004267	0.869635319	0.901796442	0.894290784	0.893824167	0.89519879	0.896369726	0.894552285	0.904925132	0.903296907	0.901714759	0.909242218	0.918070636	0.923534698
14:59:57.120	0.949239301	1.018552106	0.868924867	0.865138579	0.871032961	0.869524763	0.901698084	0.894197952	0.893756922	0.895094723	0.896180198	0.894333647	0.90476461	0.903129447	0.901550662	0.909155875	0.917945534	0.923421242
14:59:57.984	0.950850633	1.0172443	0.869043647	0.865176639	0.870981312	0.86955932	0.901693627	0.894172158	0.893707451	0.89502279	0.896099987	0.894288194	0.90459304	0.902996953	0.901455367	0.909032135	0.91779381	0.923333408
14:59:58.848	0.950746944	1.011454469	0.868891277	0.865173264	0.871004284	0.869469893	0.901682901	0.894165874	0.893690986	0.894999963	0.896009305	0.894269786	0.904552095	0.902980356	0.901389205	0.908907462	0.917627403	0.923182191
14:59:59.712	0.949672274	1.018270091	0.868903185	0.865203522	0.870992041	0.869541346	0.901657568	0.894195436	0.893698057	0.895050451	0.896124906	0.89427222	0.90459142	0.903021592	0.901394175	0.908905321	0.91762948	0.923139537
15:01:15.744	0.945463604	1.005544934	0.867786465	0.864285053	0.870555049	0.86860269	0.900619826	0.892593115	0.891478198	0.892437049	0.893202301	0.891688041	0.902337568	0.900295834	0.89877086	0.907136378	0.919047105	0.922114277
15:01:16.608	0.946345664	1.009099517	0.868265486	0.864290529	0.87048406	0.868912741	0.900764493	0.89269849	0.89161515	0.892617559	0.893549047	0.89190018	0.902361981	0.900537696	0.899023975	0.907289494	0.91907597	0.922028986
15:01:17.472	0.94518041	1.014069383	0.868344113	0.864389899	0.870643219	0.869071449	0.901016048	0.892996203	0.891966304	0.893007115	0.893972121	0.892272318	0.902859844	0.901041204	0.899495842	0.907598764	0.919486083	0.922202183
15:01:18.336	0.945647894	1.007799623	0.868336556	0.864369051	0.870655073	0.869169491	0.901152882	0.893120968	0.892098759	0.893199397	0.894167947	0.892487166	0.903174989	0.901317723	0.899886193	0.907966195	0.919843834	0.922530666
15:01:19.200	0.943262595	1.006869364	0.868430799	0.86446635	0.870721446	0.869219514	0.90119175	0.893213097	0.89220999	0.893335499	0.894333745	0.892718212	0.903261748	0.90154249	0.900136346	0.908101821	0.920005282	0.922669069
15:01:20.064	0.943765739	1.007213891	0.868627694	0.864528834	0.870806893	0.869278197	0.901323784	0.893399631	0.892377157	0.893538163	0.894555149	0.892994583	0.903601967	0.901869154	0.900532108	0.908526159	0.92048408	0.923078842
15:01:20.928	0.943519803	1.013315886	0.868563693	0.864484765	0.870795284	0.869287701	0.901407209	0.893447087	0.892411141	0.893579848	0.89458907	0.893044692	0.90364914	0.901921279	0.900543767	0.908389283	0.920439086	0.922993963
15:01:22.656	0.947395432	1.007453962	0.868492195	0.864473568	0.870869435	0.869346305	0.901476643	0.893478388	0.892499406	0.893659669	0.89473318	0.893222451	0.903782791	0.902059438	0.900607606	0.908430472	0.920567795	0.923007728
15:01:23.520	0.944384054	1.010224386	0.868516092	0.864511572	0.870918261	0.869405209	0.901507346	0.893570154	0.892561958	0.893793366	0.894831351	0.893405441	0.903956553	0.902196852	0.900740416	0.908548252	0.920740282	0.923161834
15:01:24.384	0.943524094	1.007312168	0.868492486	0.864564138	0.87096284	0.86944719	0.901570395	0.893641088	0.89263219	0.893840187	0.895016537	0.893454414	0.904011441	0.902283366	0.900788313	0.908549997	0.920749316	0.923109138
15:01:25.248	0.946871196	1.009009626	0.868593864	0.864521601	0.870955238	0.869415891	0.901620961	0.893657206	0.892671016	0.893902039	0.895085872	0.893618723	0.904062746	0.902376061	0.900848519	0.908557373	0.920801721	0.923085819
15:01:26.112	0.94340999	1.00951163	0.86855094	0.864561371	0.871008664	0.869506021	0.901750575	0.893732457	0.892780573	0.894052377	0.895236802	0.893835019	0.904276144	0.902565261	0.901092088	0.908903667	0.921180654	0.923444903
15:01:26.976	0.946256685	1.015956855	0.868501629	0.864533898	0.871002489	0.86951441	0.901728433	0.893743862	0.892764288	0.894026569	0.895190421	0.893807389	0.904204263	0.902505016	0.900956683	0.908703312	0.920979235	0.92316059
15:01:27.840	0.945429943	1.003840562	0.868374015	0.864575668	0.871067176	0.869545484	0.90170873	0.893763893	0.892758123	0.894022758	0.89518098	0.893700767	0.904154904	0.902463147	0.900864667	0.908484563	0.920856252	0.922972248
15:01:28.704	0.944451972	1.01414698	0.868586387	0.864625972	0.871128353	0.86951758	0.901773907	0.893817099	0.892807895	0.894078116	0.895230226	0.893845181	0.904323038	0.90257821	0.901001554	0.908688121	0.921152345	0.923202656
15:01:30.432	0.94361817	1.016809024	0.868479165	0.864668861	0.871089514	0.869561954	0.901803897	0.893838562	0.892828336	0.894102234	0.895261487	0.89383467	0.904318854	0.902556235	0.900985059	0.908633701	0.921157	0.923140581
15:01:31.296	0.942054858	1.005422113	0.868483992	0.864624408	0.871126184	0.869637651	0.901836913	0.893847619	0.892844307	0.894114597	0.895229629	0.893861664	0.904325204	0.90258362	0.901004884	0.908601251	0.921172359	0.92316457
15:01:32.160	0.942889631	1.005817386	0.868641645	0.864678496	0.871142861	0.869506517	0.901841452	0.893853686	0.892841309	0.894121616	0.895270551	0.893835255	0.904387822	0.902576894	0.901024555	0.908646316	0.921274803	0.923205653
15:01:33.024	0.945397955	1.012865165	0.868665958	0.864699099	0.871156877	0.869646811	0.901973058	0.893973067	0.892978165	0.894281406	0.895452301	0.89407373	0.904769285	0.902944387	0.901529293	0.909339334	0.922016532	0.924105603
15:01:33.888	0.945453559	1.011417297	0.868708285	0.86473465	0.871194507	0.869592314	0.901937671	0.893929484	0.892929718	0.894206094	0.895384113	0.893939661	0.90461603	0.902781709	0.901318278	0.909024918	0.921687048	0.923732743
15:01:34.752	0.943035165	1.002780266	0.868734307	0.864658962	0.871182111	0.869581546	0.901935659	0.893934339	0.892890295	0.894134536	0.89526485	0.893837039	0.904508751	0.902673164	0.901158485	0.9088757	0.921589987	0.923530568
15:01:35.616	0.942715114	1.003114367	0.868771286	0.86467486	0.871225208	0.869678786	0.901940684	0.893919483	0.892891963	0.894168667	0.89522738	0.893780436	0.904481111	0.902655848	0.9011653	0.908966551	0.921733454	0.923657522
15:01:37.344	0.942096361	1.007406956	0.868690294	0.864696545	0.87121138	0.869602777	0.901968532	0.893967962	0.892903133	0.894186531	0.895212101	0.89379882	0.90453798	0.902744042	0.901254041	0.909202619	0.92206431	0.923937999
15:01:38.208	0.943762607	1.014114632	0.868661427	0.864694419	0.87120096	0.869588717	0.901903148	0.893887054	0.892836378	0.894067252	0.895143617	0.893662431	0.904324715	0.902515809	0.900987508	0.908844997	0.921794484	0.923543474
15:01:39.072	0.943225449	1.010339203	0.868615731	0.864680125	0.871221792	0.869664897	0.901877337	0.893830699	0.89277399	0.893982033	0.895007281	0.893455279	0.904199188	0.902387864	0.900845818	0.908778189	0.921737415	0.923469934
15:01:39.936	0.941441269	1.005458779	0.868700256	0.86468167	0.871216062	0.869584638	0.901864339	0.893838587	0.892760119	0.893982854	0.895055803	0.893485419	0.904196454	0.902430703	0.900901722	0.908966476	0.922008309	0.923691578
15:01:40.800	0.941696238	1.013264891	0.868710773	0.864652595	0.871210345	0.869670085	0.901914232	0.893817165	0.89272925	0.893945645	0.895001803	0.893488598	0.904151826	0.90238399	0.900848736	0.908919471	0.92203707	0.923658787
15:01:41.664	0.939862616	1.013847264	0.868618311	0.864694368	0.871197732	0.869569363	0.90183751	0.893740047	0.892637334	0.89381709	0.894820896	0.893228138	0.903968513	0.902186117	0.900604043	0.908598716	0.921722479	0.923343688
15:01:42.528	0.943636817	1.006067896	0.868605594	0.864634158	0.871132664	0.869627259	0.901850119	0.893700803	0.892582637	0.893723398	0.894749911	0.893162476	0.903807164	0.902065044	0.90048573	0.908488105	0.921697717	0.923218855
15:01:43.392	0.944561677	1.020717084	0.868597478	0.864617198	0.871142045	0.869558776	0.901686066	0.893602606	0.892495301	0.893605522	0.894607806	0.892924923	0.903593858	0.901868935	0.900304205	0.908317889	0.921523628	0.923059078
15:01:45.120	0.942459513	1.006691261	0.868752718	0.864649474	0.871125223	0.869573076	0.901744811	0.893561875	0.892442232	0.893591384	0.894664916	0.893059601	0.903631194	0.901904381	0.900437511	0.908493798	0.921794883	0.923320978
15:01:45.984	0.941247476	1.015476572	0.868793637	0.864577156	0.87107534	0.869568054	0.901605949	0.89345119	0.892307523	0.893411764	0.894384228	0.892686593	0.903353058	0.901609985	0.900088591	0.908219367	0.921473697	0.923019218
15:01:46.848	0.942868222	1.005956337	0.86856605	0.864638985	0.871016748	0.869489674	0.901508343	0.893333616	0.892135539	0.893213905	0.893997967	0.892451784	0.903122855	0.901357238	0.899794248	0.907980341	0.921253113	0.922839207
15:01:47.712	0.944217557	1.013073554	0.868577553	0.864639598	0.87101133	0.86946299	0.901501176	0.89325335	0.892024877	0.893071313	0.893891266	0.892255154	0.902896326	0.901155923	0.899627134	0.907902575	0.921214768	0.922788358
15:01:48.576	0.941984858	1.011437534	0.868625146	0.86454297	0.870975431	0.869419043	0.901444026	0.893147239	0.891923197	0.892928816	0.893773183	0.892055275	0.902733803	0.900996941	0.899434915	0.907721195	0.921116818	0.922667939
15:01:49.440	0.942688984	1.005721008	0.868487785	0.864522239	0.870881777	0.869355408	0.901292543	0.893022635	0.891781626	0.892735318	0.893505856	0.891764171	0.902390783	0.900687074	0.899043822	0.907341718	0.920752045	0.922249133
15:01:50.304	0.941300166	1.008631647	0.868579025	0.864508761	0.870935058	0.869386446	0.901238628	0.892974324	0.891720847	0.892648981	0.893494389	0.89170892	0.902305494	0.900590197	0.899002757	0.907298868	0.92077542	0.922297185
15:01:51.168	0.943639373	1.011054598	0.868493995	0.864375452	0.870840492	0.869280023	0.901044668	0.892785988	0.891482764	0.892355393	0.893063654	0.89126014	0.901855252	0.900098561	0.89835402	0.906605289	0.919973137	0.921523072
15:01:52.896	0.945420215	1.014575889	0.868714508	0.86445554	0.870902684	0.869307736	0.901122743	0.892814939	0.891525455	0.892431433	0.893218258	0.891398567	0.901990442	0.900290724	0.898767072	0.907158256	0.920556727	0.922179093
15:01:53.760	0.945760357	1.005799808	0.868645719	0.864365236	0.870835058	0.869238747	0.901008903	0.892709731	0.891376696	0.892243079	0.892923	0.89117873	0.901794164	0.90005727	0.898409974	0.906856988	0.920226412	0.921885122
15:01:54.624	0.945437611	1.010681527	0.868538507	0.864364841	0.870792993	0.869162839	0.900969778	0.89259857	0.891254822	0.892083119	0.892749639	0.89086163	0.90149938	0.899780449	0.898088557	0.906531612	0.919907955	0.921486825
15:01:55.488	0.945975806	1.008528634	0.868496644	0.86435994	0.870787279	0.869171328	0.900920669	0.892514751	0.891150037	0.891978976	0.892629211	0.890773063	0.901355425	0.899613288	0.897969359	0.906423974	0.919914007	0.921442908
15:01:56.352	0.945046802	1.008126221	0.868594931	0.86439812	0.870780162	0.869258371	0.900870387	0.892488961	0.89114456	0.891961856	0.89266149	0.890797397	0.901377118	0.899646231	0.898100936	0.90660342	0.920217255	0.921788941
15:01:57.216	0.941355092	1.008437379	0.868435182	0.864447505	0.87075594	0.869146798	0.90086697	0.89245929	0.891073972	0.891860654	0.892508797	0.890710463	0.901194804	0.899500037	0.8979425	0.906454944	0.919985818	0.921573236
15:01:58.080	0.94249037	1.004070476	0.868725901	0.864446152	0.870785813	0.869272882	0.900951002	0.892556977	0.891179528	0.891999833	0.892796308	0.891033494	0.901508712	0.899834732	0.898430444	0.907315846	0.92070709	0.922362742
15:01:59.808	0.944388823	1.013886456	0.868462228	0.864435048	0.870776484	0.869146736	0.900883217	0.892452373	0.891046278	0.891845389	0.89254726	0.890765344	0.90119778	0.899538261	0.898010777	0.906636457	0.920094005	0.921740271
15:02:00.672	0.941453136	1.011588137	0.868593838	0.864420917	0.870760871	0.869197267	0.900827815	0.892382482	0.890991362	0.891759541	0.892563393	0.890604409	0.901046883	0.899358473	0.89774954	0.906132115	0.919706107	0.921211408
15:03:15.840	0.947844987	0.999700785	0.870556862	0.865972389	0.872812288	0.871185624	0.903415734	0.894648369	0.892829134	0.893789325	0.894730783	0.893321015	0.903828128	0.902164039	0.900273865	0.908400365	0.922925129	0.92306107
15:03:16.704	0.940595195	1.005096425	0.870238017	0.865896613	0.87281622	0.87127267	0.903326536	0.894588764	0.89280223	0.893689	0.894605092	0.893190031	0.903865232	0.9020859	0.900366127	0.908266438	0.922857966	0.922984004
15:03:17.568	0.94198481	1.00571525	0.870449375	0.865963024	0.87295059	0.871430836	0.90337209	0.894602821	0.892844075	0.89368789	0.894536944	0.893075882	0.90376441	0.901984501	0.900154236	0.907953508	0.922572274	0.922670039
15:03:19.296	0.942298434	1.006784145	0.870443869	0.866112508	0.873020145	0.871518857	0.903474445	0.894732741	0.893003646	0.893882498	0.894874799	0.893339337	0.90408853	0.902382244	0.900738194	0.908688037	0.923247368	0.92342974
15:03:20.160	0.942937464	1.002137294	0.870393383	0.866072434	0.873053272	0.8714842	0.903607166	0.894881462	0.893134474	0.894044116	0.895167843	0.893565804	0.90435569	0.902688061	0.901124992	0.909192024	0.923701039	0.923916251
15:03:21.024	0.942306686	1.002568027	0.870543969	0.866194646	0.873136183	0.871530405	0.903652649	0.894905437	0.893184222	0.89406736	0.89509929	0.893573279	0.904399038	0.902712215	0.901078816	0.909138924	0.92361347	0.92378914
15:03:21.888	0.940760739	0.998138721	0.870500786	0.866241142	0.873133468	0.871615746	0.903641385	0.894904383	0.89316115	0.894060813	0.895080126	0.893514963	0.904316466	0.902585321	0.900846856	0.908635836	0.923159271	0.923276777
15:03:22.752	0.94230176	1.0042576	0.870553389	0.866219859	0.873265052	0.871658495	0.903851068	0.895125667	0.893409938	0.894388683	0.895532489	0.894075395	0.90493547	0.903173111	0.901566087	0.90945068	0.9239295	0.924084857
15:03:23.616	0.943569217	1.00008518	0.870752459	0.866322386	0.873358048	0.871721205	0.904001213	0.895321432	0.893645406	0.894674273	0.895875895	0.894549091	0.905390277	0.903594757	0.90200501	0.909960344	0.924326627	0.924529015
15:03:24.480	0.94007757	1.007805918	0.870723285	0.86638493	0.873387022	0.871796965	0.90406623	0.895351989	0.893688051	0.894672947	0.89583418	0.894498098	0.905352108	0.903485964	0.901702108	0.909282118	0.923667719	0.923677653
15:03:26.208	0.94079618	1.00228396	0.870712068	0.866479429	0.873420219	0.871841572	0.904164183	0.895487372	0.893806717	0.894855362	0.896033838	0.894756835	0.905414889	0.903640802	0.901788292	0.909067555	0.923488014	0.923348603
15:03:27.072	0.940920083	1.001094422	0.870816737	0.866526171	0.873569418	0.871966384	0.904344526	0.895714822	0.894070276	0.895174121	0.896493518	0.895317643	0.905961357	0.904147409	0.902375904	0.909724343	0.924050153	0.923979824
15:03:27.936	0.942144801	1.006728837	0.870767038	0.866470892	0.873624352	0.872001423	0.904485854	0.895839186	0.894220493	0.895336836	0.896669976	0.895411967	0.906122744	0.904338052	0.902561325	0.9097782	0.924077586	0.923957336
15:03:28.800	0.939284421	0.998304268	0.870872256	0.866561356	0.873628577	0.872129605	0.904541389	0.895932986	0.89430624	0.895440929	0.896760234	0.895480791	0.90619552	0.904448506	0.902661916	0.909770851	0.924054024	0.92392512
15:03:29.664	0.944497378	1.010757512	0.870995987	0.866633619	0.873707541	0.872133022	0.904676627	0.896127194	0.894485882	0.895680549	0.896984398	0.89585989	0.906600085	0.90482662	0.903101006	0.910288287	0.924627076	0.924583023
15:03:30.528	0.938739723	1.005673336	0.870966267	0.866713784	0.873792693	0.872178869	0.904733549	0.896147212	0.894551114	0.895723953	0.89705129	0.895830814	0.906610816	0.904876229	0.903082326	0.910244224	0.924654364	0.924545919
15:03:31.392	0.938522765	1.000480082	0.870837541	0.866676343	0.873782007	0.872206426	0.9047413	0.896142665	0.894520524	0.895708228	0.896981758	0.895817198	0.906550499	0.904797713	0.902968798	0.91008148	0.924531506	0.924349117
15:03:32.256	0.941343268	0.99585847	0.870899657	0.866633391	0.873768384	0.872263107	0.904770103	0.896149146	0.894544464	0.895715353	0.896950864	0.895832626	0.906588054	0.904848616	0.903010433	0.910149149	0.924625928	0.924427047
15:03:33.984	0.941336219	1.005226482	0.870893154	0.866640923	0.873814519	0.872212559	0.904778692	0.896128625	0.894522094	0.895672944	0.896946054	0.89577502	0.906505855	0.90478748	0.90290995	0.910015415	0.924572254	0.924353479
15:03:34.848	0.940448888	1.008575202	0.870853998	0.866613125	0.873718473	0.872199353	0.904600162	0.895948065	0.89432681	0.89541535	0.896612358	0.895287315	0.90597397	0.904294321	0.902250042	0.909089056	0.923565159	0.923200937
15:03:35.712	0.939164034	1.004606816	0.871034246	0.86668369	0.873789857	0.872232379	0.904674645	0.896081642	0.894479504	0.895638564	0.896945049	0.895675758	0.906340613	0.904738438	0.902855399	0.909954703	0.924441082	0.924218519
15:03:36.576	0.943748258	1.000482636	0.871022337	0.866603286	0.873783464	0.872154128	0.904705727	0.896092365	0.894453851	0.895632649	0.896913569	0.895619641	0.906326062	0.904726132	0.902845644	0.909938472	0.924465207	0.924181331
15:03:37.440	0.940740437	0.998022926	0.871225259	0.866701181	0.873739634	0.872266457	0.904661226	0.896043834	0.894411777	0.895517507	0.89681967	0.895451386	0.906215848	0.904564144	0.902716344	0.90981999	0.924429226	0.924076316
15:03:38.304	0.93786687	1.005173058	0.870873204	0.866728954	0.873736395	0.872039962	0.904574389	0.895959579	0.894349122	0.895458754	0.896826986	0.895435498	0.906116564	0.904505201	0.902641735	0.909796496	0.92442553	0.924102383
15:03:39.168	0.939680008	1.005116361	0.870869061	0.866669454	0.873692083	0.872099115	0.904498983	0.895893924	0.894261648	0.895335095	0.896618403	0.895250481	0.906004495	0.904311503	0.902442542	0.909635557	0.924319779	0.923967427
15:03:40.032	0.941180577	1.002252574	0.870887166	0.866620116	0.873742356	0.872117069	0.904509348	0.895871353	0.894217918	0.895293636	0.896488407	0.895144054	0.905959921	0.904254225	0.902405913	0.909546451	0.924331913	0.923969307
15:03:41.760	0.940212465	1.000095237	0.871015641	0.866660787	0.873691851	0.872210637	0.90448012	0.895796536	0.894162536	0.895204182	0.896446824	0.895104987	0.905761995	0.904120708	0.902295176	0.909433045	0.924223006	0.923796096
15:03:42.624	0.938853802	1.005071282	0.87087545	0.866681824	0.873748894	0.872203915	0.904558808	0.895881284	0.894245778	0.895325087	0.896677997	0.895334353	0.906030357	0.904351834	0.902583532	0.909732011	0.924626383	0.924239062
15:03:43.488	0.939590308	1.005405777	0.870970908	0.866765498	0.8737978	0.872184353	0.904551995	0.895932531	0.894307339	0.895405098	0.896779593	0.895391978	0.90613566	0.904444141	0.902720512	0.909756509	0.924639417	0.92420513
15:03:44.352	0.942490928	1.006576733	0.870934592	0.866742678	0.873830776	0.87215157	0.904662465	0.896060623	0.894451058	0.895577555	0.896948968	0.895596565	0.906395039	0.904667949	0.902975665	0.909848057	0.924718062	0.924266707
15:03:45.216	0.941265168	1.00153753	0.871187033	0.866810747	0.873963583	0.872386461	0.904858763	0.896282024	0.894734898	0.895927565	0.897455176	0.896255183	0.906972753	0.905199098	0.903537419	0.910457774	0.925247899	0.924788147
15:03:46.080	0.938793964	1.009221817	0.871034053	0.866863205	0.87403556	0.872361907	0.904916634	0.896387326	0.894843263	0.896024908	0.897545905	0.896353282	0.907067128	0.905219543	0.903445211	0.910038948	0.924775391	0.924181333
15:03:46.944	0.938186549	1.004977461	0.871205909	0.866958586	0.874107682	0.872449357	0.905085704	0.896614444	0.895137973	0.896360565	0.898006555	0.89686301	0.907622068	0.905709406	0.903957202	0.910485365	0.925263204	0.924645597
15:03:48.672	0.940593648	1.002480383	0.871326509	0.867049042	0.874238058	0.872651819	0.905318372	0.896836151	0.895330339	0.896639488	0.898240116	0.897176943	0.907910048	0.906017607	0.904221971	0.910456629	0.92524282	0.924476544
15:03:49.536	0.93830911	1.005743383	0.871462005	0.867147963	0.874354838	0.872681668	0.905642752	0.897198906	0.895772424	0.89719743	0.898875818	0.89798702	0.90888187	0.90692505	0.905277453	0.911567816	0.926351697	0.925574469
15:03:50.400	0.939086449	1.000232028	0.871605649	0.867226705	0.874516079	0.872997808	0.905913996	0.897517905	0.896179549	0.897710462	0.899529738	0.898627683	0.909563528	0.907689385	0.906070261	0.912379671	0.92710647	0.926339721
15:03:51.264	0.940246852	1.003622647	0.871573045	0.867418521	0.874684306	0.87306504	0.906127714	0.897892753	0.896580104	0.898213243	0.900103042	0.899333595	0.910320815	0.908362003	0.90690937	0.913092871	0.927721653	0.92691139
15:03:52.128	0.939140623	1.005658503	0.871618801	0.867438365	0.874798745	0.873197295	0.906358077	0.898132045	0.896867109	0.898544808	0.900453062	0.89975252	0.91073056	0.908719131	0.907120281	0.91299215	0.927540075	0.926626622
15:03:52.992	0.938756944	1.010918408	0.871702166	0.867533965	0.874970915	0.873364533	0.906629471	0.898447731	0.897279904	0.899036654	0.900960753	0.900382381	0.91145826	0.909425456	0.90784012	0.913496566	0.928073158	0.927047611
15:03:53.856	0.9405958	1.004852917	0.871833742	0.867672851	0.875145882	0.873550854	0.906908578	0.898842439	0.897710415	0.899596024	0.901685641	0.901142794	0.912248738	0.910167879	0.908611811	0.914158042	0.928764602	0.927664383
15:03:54.720	0.941081462	1.001070832	0.871819326	0.867767991	0.875249829	0.873649691	0.907133475	0.899102882	0.898018739	0.899960402	0.902107354	0.901505052	0.912768927	0.910699793	0.909186598	0.914638902	0.929229493	0.928075859
15:03:56.448	0.940487336	1.006673247	0.871853467	0.867838991	0.875323756	0.873707036	0.907207924	0.899230797	0.898218392	0.900151963	0.902322463	0.901774774	0.912914926	0.91096108	0.909427558	0.914761263	0.929311221	0.928086476
15:03:57.312	0.937925523	0.99999567	0.871903766	0.867852044	0.875316589	0.873799319	0.907349346	0.899319791	0.898306706	0.900272809	0.902461271	0.901933449	0.912932113	0.91105937	0.909435608	0.914527216	0.929080643	0.927825514
15:03:58.176	0.94058431	0.996313215	0.872090456	0.867866229	0.875430473	0.873825476	0.907401568	0.899454691	0.898405395	0.900461469	0.902577771	0.901995466	0.913097971	0.91121853	0.909629346	0.914633273	0.929177074	0.927926334
15:03:59.040	0.939422505	1.007935086	0.871958059	0.867925092	0.875480385	0.873860591	0.907446352	0.899568775	0.898549699	0.900617647	0.902821423	0.902163374	0.913222843	0.911412306	0.909741592	0.914699548	0.929205813	0.927936451
15:03:59.904	0.939609698	1.004476416	0.872148867	0.867860246	0.875545581	0.873854597	0.907520079	0.899643192	0.898668213	0.900753391	0.903018655	0.902430995	0.913427061	0.911597434	0.909974712	0.914792052	0.929270283	0.927971187
15:05:15.072	0.93229414	1.006653494	0.873720758	0.870842315	0.878392528	0.876749035	0.909788183	0.904519727	0.905115213	0.908848553	0.912525798	0.913083084	0.923053234	0.921629149	0.921697478	0.924535551	0.93801254	0.936336224
15:05:16.800	0.934012861	0.996749446	0.873752172	0.870716545	0.878342858	0.8766392	0.909567369	0.904328489	0.904951219	0.90861309	0.91216241	0.912773674	0.922863494	0.921352726	0.921443315	0.92448457	0.938024245	0.936387439
15:05:17.664	0.933439893	0.993196952	0.873898262	0.870799078	0.878306519	0.876599335	0.909381531	0.904145308	0.904739453	0.908354685	0.911886146	0.912483056	0.922458211	0.920978067	0.921208675	0.924495773	0.938097243	0.936542399
15:05:18.528	0.934121823	0.990679286	0.873662173	0.870712739	0.878172203	0.876430993	0.909083445	0.903854427	0.904416748	0.907952031	0.911359481	0.911894534	0.921866008	0.920337767	0.920558576	0.923962766	0.937524731	0.93601459
15:05:19.392	0.932599184	0.993938605	0.873672222	0.870717165	0.878110881	0.87642083	0.908924498	0.903664849	0.904196387	0.90769121	0.910995449	0.911511742	0.921495557	0.919969506	0.920295749	0.923895141	0.937465773	0.936026193
15:05:20.256	0.932887761	0.996664449	0.873817328	0.87074128	0.878032351	0.876389619	0.908751284	0.903459484	0.903997685	0.907436493	0.910695451	0.911230168	0.921159646	0.919664524	0.92001907	0.923727243	0.937369652	0.935987722
15:05:21.120	0.933735296	0.992192248	0.873669597	0.870647572	0.877955702	0.876230922	0.90851736	0.903267078	0.903784316	0.907161009	0.91032079	0.91082594	0.920798938	0.919278983	0.919642706	0.923515589	0.937250825	0.935857672
15:05:21.984	0.936449436	0.995852207	0.873513747	0.87064634	0.877936597	0.876082587	0.908357514	0.903120327	0.903619033	0.906961903	0.910103361	0.910557226	0.920508946	0.918973624	0.919382344	0.923411717	0.937188296	0.93575387
15:05:22.848	0.935324178	0.991837573	0.873845119	0.870629714	0.877888257	0.876269795	0.908349468	0.903087208	0.903592521	0.906975657	0.910087039	0.910567123	0.920512694	0.919009468	0.919584068	0.923764958	0.93762682	0.936145878
15:05:24.576	0.931823072	1.001069397	0.873593944	0.870699414	0.877883483	0.876191229	0.908251799	0.902986179	0.903496544	0.906853757	0.90993965	0.910427524	0.920303831	0.918826438	0.919453617	0.923672835	0.937538404	0.936097714
15:05:25.440	0.933758413	0.991100147	0.873654803	0.870694639	0.877878425	0.876255813	0.908225745	0.903022176	0.903538858	0.906925346	0.910088143	0.910514854	0.920478134	0.918950815	0.919630285	0.924013318	0.937841031	0.936516722
15:05:26.304	0.933736008	0.995809279	0.873674257	0.870790901	0.877897853	0.876328564	0.90817676	0.903060536	0.903589866	0.906962724	0.910127238	0.910615239	0.920457059	0.918986519	0.919666878	0.924078506	0.9379345	0.936627448
15:05:27.168	0.934319303	0.993420485	0.873655569	0.870769216	0.877945248	0.876213838	0.908119935	0.903027765	0.903571504	0.906950841	0.91009568	0.910482585	0.920361168	0.918921909	0.919610818	0.923933669	0.937786722	0.936493391
15:05:28.032	0.932788221	0.990865906	0.873695673	0.870814919	0.877966521	0.87623686	0.908135766	0.903086138	0.903637611	0.90705103	0.910179591	0.910630589	0.92046647	0.919031743	0.919728842	0.92412117	0.937975424	0.936661671
15:05:28.896	0.933179414	0.993513066	0.873772777	0.870884373	0.878093295	0.876261417	0.908249876	0.903243971	0.903841886	0.907307577	0.910464311	0.911088511	0.920894332	0.919447693	0.920338917	0.924731119	0.938597711	0.937314794
15:05:29.760	0.935872018	1.000285375	0.873921875	0.870954648	0.878084282	0.876438355	0.908303563	0.903284567	0.903918323	0.907377841	0.910513575	0.911207439	0.920846807	0.919416785	0.920246202	0.924492001	0.93827889	0.937009162
15:05:30.624	0.931601333	0.990472392	0.873730023	0.871050634	0.878207213	0.876465815	0.908421361	0.903466659	0.904137813	0.907637469	0.910778733	0.911492296	0.921198341	0.919731875	0.920536606	0.924798505	0.938509716	0.937243054
15:05:32.352	0.932190551	0.98856788	0.873847214	0.870939426	0.878224012	0.876598517	0.908450032	0.903529451	0.904209048	0.907728711	0.910944634	0.911592735	0.921251304	0.919760545	0.920503812	0.924602426	0.938163595	0.93689948
15:05:33.216	0.93378401	0.997082903	0.874035109	0.871065705	0.878314171	0.876583933	0.908517488	0.903680374	0.904388587	0.907951257	0.911170182	0.911947576	0.921499004	0.920035892	0.920746491	0.924700602	0.938203035	0.93701249
15:05:34.080	0.933224211	0.990952111	0.873995536	0.871188059	0.878376688	0.876711988	0.908663746	0.903881331	0.90459239	0.908229657	0.911546326	0.912402982	0.921874223	0.920469016	0.921318734	0.925301283	0.938702931	0.937529926
15:05:34.944	0.932988554	0.997570911	0.874085378	0.871241143	0.878501272	0.876782489	0.908840747	0.904046792	0.904857683	0.908523208	0.91185559	0.912814646	0.922371663	0.920879217	0.921825777	0.925866482	0.939218444	0.93813627
15:05:35.808	0.933697684	0.993336171	0.874139521	0.871358042	0.878564516	0.876836242	0.908768825	0.904062043	0.90488367	0.908541863	0.911810065	0.912746626	0.922337862	0.920854636	0.921683146	0.925630195	0.938935034	0.937841153
15:05:36.672	0.933549098	0.993957473	0.874069267	0.871251427	0.878557384	0.876922177	0.908713359	0.904040439	0.904852871	0.908495626	0.911718469	0.912644142	0.922099593	0.920638415	0.921393631	0.925084496	0.938455025	0.93730578
15:05:37.536	0.932873492	0.995431813	0.874223527	0.871466529	0.878662211	0.876963414	0.908888352	0.904268555	0.905125305	0.908865473	0.91219624	0.913004649	0.922703436	0.921173364	0.922100753	0.92598428	0.939289891	0.938139293
15:05:39.264	0.931167025	0.995594884	0.874002697	0.871485875	0.878683609	0.876926629	0.908883988	0.904301139	0.905175591	0.908925621	0.912300237	0.912997406	0.922648953	0.921152586	0.922122176	0.92594164	0.939182606	0.938035681
15:05:40.128	0.933658999	0.995498938	0.8741464	0.871573253	0.87872562	0.877064281	0.908915283	0.90438207	0.905299072	0.909056575	0.912492322	0.913242269	0.922841277	0.921368545	0.922464537	0.926418735	0.939538329	0.938530066
15:05:40.992	0.932252094	0.983323757	0.874099324	0.871461609	0.878662204	0.876988292	0.908717995	0.904217529	0.905099445	0.908790702	0.91211289	0.912759017	0.922375387	0.920878063	0.921733984	0.925472721	0.938574047	0.937494451
15:05:41.856	0.933303536	0.993410268	0.874064401	0.871480521	0.878734888	0.876979515	0.908822252	0.904328563	0.905241059	0.90901135	0.912483165	0.913227924	0.922687005	0.921308152	0.922451815	0.926579276	0.939579184	0.938740556
15:05:42.720	0.933598955	0.985470881	0.874254794	0.871600883	0.878603653	0.877003446	0.908621126	0.90416952	0.905059564	0.908773488	0.912147694	0.912871302	0.922322913	0.920947164	0.922060293	0.926139638	0.939143635	0.938344216
15:05:43.584	0.934184334	0.994559896	0.874093972	0.871564175	0.878575115	0.876859198	0.908455469	0.904015869	0.904894751	0.908582072	0.911905395	0.9125924	0.92204094	0.920598095	0.921728997	0.925867818	0.938800792	0.938011129
15:05:44.448	0.931416449	0.98994767	0.874160398	0.871465486	0.878471284	0.876781713	0.908264747	0.903734803	0.904575393	0.908174471	0.911298595	0.91195405	0.921458494	0.919972914	0.920974983	0.925096297	0.938018691	0.937252109
15:05:45.312	0.930940193	0.995679582	0.874080045	0.871430055	0.878450719	0.876759634	0.908094456	0.903613252	0.904459989	0.908026921	0.911179	0.911802819	0.921248817	0.919836686	0.920929287	0.925250374	0.938196473	0.937546251
15:05:47.040	0.932088705	0.993790185	0.874187918	0.871511262	0.878371613	0.876693609	0.907966682	0.903459996	0.904303851	0.907864883	0.910938462	0.911616282	0.921047244	0.919573459	0.92080815	0.925277041	0.938255058	0.93764916
15:05:47.904	0.932515917	0.992378393	0.87401406	0.871484245	0.878352297	0.876659685	0.907726275	0.903326015	0.904175623	0.907704163	0.910765427	0.911403554	0.920805645	0.919345837	0.920642448	0.925284491	0.938329113	0.937732214
15:05:48.768	0.931546719	0.989736073	0.874092239	0.871452069	0.878332174	0.876657781	0.907709796	0.903261231	0.904119739	0.907662812	0.910791193	0.911317219	0.920741011	0.919320993	0.920730009	0.925547039	0.938660062	0.938065674
15:05:49.632	0.933414909	0.990146549	0.874078765	0.871512894	0.878285851	0.876666982	0.907565758	0.903210816	0.904061845	0.907571028	0.910662958	0.911255383	0.920603518	0.919191319	0.920725285	0.925737325	0.938840249	0.938314535
15:05:50.496	0.934693577	0.994880188	0.873946412	0.871486866	0.878212836	0.876592873	0.907386009	0.902951621	0.903796821	0.907252329	0.910136134	0.91079078	0.920087777	0.91863116	0.920046627	0.924979121	0.938031528	0.937483705
15:05:51.360	0.932734481	0.995050659	0.874030275	0.871460614	0.878200058	0.87644984	0.907121801	0.902717535	0.903571009	0.906973422	0.90975088	0.910315562	0.919511826	0.918116865	0.919388153	0.924240327	0.937250445	0.936729372
15:05:52.224	0.931818765	0.992195778	0.87405723	0.87148225	0.87816699	0.876454373	0.907151702	0.902781298	0.903586309	0.906996977	0.909783734	0.910349725	0.919542573	0.918169194	0.919510622	0.924489939	0.937424535	0.937016218
15:05:53.088	0.934791684	0.987289909	0.874054676	0.871495106	0.87818006	0.876504416	0.907082075	0.902706541	0.903557553	0.906971878	0.909760625	0.910301278	0.919458676	0.918034159	0.919388835	0.924326398	0.937183762	0.936882758
15:05:54.816	0.933121585	0.989500063	0.874088643	0.871427859	0.878183963	0.876460675	0.907009323	0.902656961	0.90351302	0.906888401	0.909614257	0.910094523	0.919280349	0.917861282	0.919153132	0.924059989	0.936810328	0.936584262
15:05:55.680	0.93048762	0.992573929	0.873963235	0.871606669	0.878187152	0.876378049	0.906991638	0.902669776	0.903531764	0.906922388	0.909611199	0.910149927	0.919238819	0.917859461	0.919158004	0.924018633	0.936662727	0.936538367
15:05:56.544	0.933185795	0.987578299	0.873999567	0.871559661	0.878175085	0.876546604	0.906926577	0.902694378	0.903556193	0.906971397	0.909671512	0.910239602	0.919320058	0.917892671	0.919238254	0.924139347	0.936650212	0.936675918
15:05:57.408	0.932373534	0.987972891	0.874037529	0.871548639	0.878143941	0.876538494	0.906840307	0.902600455	0.903463996	0.906831472	0.909464106	0.909999696	0.919037342	0.917642445	0.918946683	0.923790458	0.936276643	0.936323098
15:05:58.272	0.930762318	0.991555988	0.874013438	0.871634823	0.878163652	0.876478627	0.906742294	0.902522368	0.903436467	0.906798771	0.909469019	0.909996855	0.918915731	0.917591359	0.918997132	0.924007841	0.936410931	0.936518619
15:05:59.136	0.934417926	0.993657578	0.874064363	0.871594969	0.878095503	0.87654368	0.906607819	0.902411136	0.903317118	0.906653576	0.909265433	0.909738508	0.918689992	0.917351229	0.918675392	0.923692415	0.936105994	0.936219121
15:06:00.000	0.931347258	0.992029479	0.873958036	0.871550627	0.878083382	0.87634072	0.906457866	0.902309137	0.903170519	0.906487325	0.90902018	0.909455113	0.918458056	0.917112731	0.918499813	0.923632326	0.936060439	0.936253641
15:07:16.032	0.928350909	0.958984324	0.875367015	0.87435816	0.879637595	0.878063195	0.904921654	0.903202166	0.903648961	0.909153059	0.911433072	0.912592319	0.919843511	0.918933316	0.923144637	0.931048849	0.940854574	0.944139698
15:07:16.896	0.931148784	0.982092643	0.875612972	0.874357959	0.879723434	0.878158352	0.904993308	0.903278771	0.903961939	0.909231619	0.91140786	0.912698646	0.919957217	0.919019671	0.923261634	0.931250814	0.940815297	0.944044909
15:07:17.760	0.931561949	0.980735097	0.875694317	0.874551595	0.87994795	0.878296385	0.905153061	0.903566432	0.904231667	0.909600094	0.911788841	0.913128989	0.920427764	0.91942025	0.923642145	0.931551961	0.941164077	0.944359294
15:07:18.624	0.930351722	0.977967062	0.875642868	0.874642839	0.880037409	0.878373066	0.905262464	0.903685508	0.904519345	0.909823441	0.911975975	0.913416673	0.920656461	0.919664568	0.923913306	0.931807356	0.941330917	0.944575509
15:07:19.488	0.928959237	0.982084123	0.87584273	0.874726821	0.880108841	0.878550874	0.905323731	0.903768164	0.904662544	0.909966219	0.912142575	0.913547509	0.9208189	0.919839036	0.924124434	0.931923798	0.941425128	0.944688968
15:07:21.216	0.927169237	0.981268757	0.875922751	0.874789502	0.88010139	0.878557662	0.905291784	0.90379521	0.904690215	0.910016423	0.912167865	0.913637582	0.920801018	0.919855535	0.924163899	0.931907732	0.94133769	0.944590551
15:07:22.080	0.928882684	0.985012491	0.875902149	0.874844868	0.880074173	0.87845468	0.905107103	0.903661098	0.90452383	0.909790006	0.911859107	0.913212192	0.920388966	0.91940365	0.923536542	0.93121497	0.940585494	0.943842436
15:07:22.944	0.92915863	0.976994198	0.876130064	0.874866236	0.880122184	0.878534376	0.905164634	0.903747131	0.904665429	0.909960112	0.912128846	0.91351741	0.920655708	0.919691537	0.92404725	0.931928338	0.941234584	0.944644867
15:07:23.808	0.928565576	0.979262256	0.875955429	0.874823171	0.880061338	0.878492321	0.904979287	0.903576539	0.904541457	0.909726777	0.911801538	0.9132001	0.920314049	0.919319146	0.923692261	0.931633445	0.940877471	0.944341353
15:07:24.672	0.928936	0.978140452	0.875973322	0.874814229	0.880022603	0.878489852	0.904950453	0.9035143	0.904542259	0.909648763	0.911682076	0.913088306	0.920246438	0.919228038	0.923685728	0.931778765	0.941050844	0.944581371
15:07:25.536	0.931240477	0.981199268	0.875833297	0.874862881	0.879997664	0.878325406	0.9047977	0.903385722	0.904272483	0.909510322	0.911648428	0.912948506	0.920013564	0.919062401	0.923632208	0.931921596	0.941149138	0.944767993
15:07:26.400	0.929538566	0.978714876	0.876013699	0.87490616	0.87994994	0.878454712	0.904769425	0.903319055	0.904270613	0.909436024	0.911494194	0.912925448	0.920052156	0.919038821	0.923649406	0.932118004	0.941369161	0.945109394
15:07:28.128	0.928553996	0.98316146	0.875982666	0.87494549	0.879994222	0.878417717	0.904657039	0.903279804	0.904174075	0.909371543	0.911537852	0.912927391	0.919959559	0.919001556	0.923721601	0.932392176	0.941586799	0.945455463
15:07:28.992	0.929187237	0.978636549	0.87591692	0.874835192	0.879922462	0.878257168	0.904480906	0.903138504	0.904209518	0.909197569	0.911314543	0.91270301	0.919649491	0.918733161	0.9234931	0.932250548	0.941351439	0.945312573
15:07:29.856	0.93081912	0.983151015	0.875844157	0.874921194	0.879920169	0.878373559	0.904458391	0.903073084	0.904084761	0.909115452	0.911212372	0.912578041	0.919524601	0.918606974	0.923374178	0.932187624	0.941286239	0.945307539
15:07:30.720	0.930060149	0.980970872	0.876002724	0.874922543	0.879930289	0.878428956	0.90431587	0.903043878	0.904037437	0.90904172	0.911101297	0.912469164	0.919417731	0.918489739	0.923287843	0.932180673	0.941217834	0.945261116
15:07:31.584	0.930712864	0.976526111	0.876046053	0.874956392	0.879941514	0.878393455	0.904300545	0.902937019	0.903864109	0.908973346	0.911044475	0.912297865	0.919227204	0.9182905	0.923107876	0.931971474	0.94099328	0.94503748
15:07:32.448	0.92785281	0.981563819	0.87597591	0.875051368	0.879932629	0.878378318	0.904290824	0.90295748	0.904035768	0.908983904	0.911022076	0.912259598	0.91917009	0.918278663	0.923075209	0.931976693	0.940900385	0.94505977
15:07:33.312	0.928690233	0.975867066	0.875948596	0.875001426	0.879923163	0.878343378	0.904204586	0.902885559	0.903905053	0.908933123	0.910923131	0.912127646	0.9190288	0.918089573	0.922868417	0.93179289	0.940645165	0.944844106
15:07:34.176	0.930674761	0.985365392	0.875941843	0.875032948	0.879942463	0.878386528	0.90416815	0.902903212	0.903862249	0.908961315	0.910843898	0.912085833	0.919009568	0.918104536	0.922918823	0.931884557	0.940667469	0.944924815
15:07:35.904	0.930017429	0.97929463	0.875872754	0.875109765	0.880015814	0.878453475	0.90418688	0.902955991	0.904048794	0.909029083	0.911005145	0.912107669	0.919037333	0.918161713	0.923024514	0.932048532	0.940886835	0.945089994
15:07:36.768	0.930894361	0.980385649	0.875924416	0.875176314	0.880041665	0.878458353	0.904172489	0.902971684	0.904036327	0.909099766	0.911013154	0.912254684	0.919003081	0.918217845	0.923110792	0.932201925	0.940947247	0.945231702
15:07:37.632	0.930319008	0.975751655	0.876025343	0.875229813	0.880050234	0.878517661	0.904193683	0.903032324	0.904250401	0.909181067	0.911059894	0.912355327	0.919057442	0.918306994	0.923283769	0.932414112	0.941053441	0.945544469
15:07:38.496	0.927940666	0.980317706	0.876103089	0.875235427	0.880122755	0.878463135	0.90413535	0.903009347	0.904192347	0.909184312	0.910998971	0.912333945	0.919042485	0.918274675	0.923312156	0.932510824	0.94099161	0.945646948
15:07:39.360	0.929899318	0.987328995	0.876098939	0.875306981	0.880147088	0.878492197	0.904118964	0.903039942	0.904229971	0.909244306	0.911097734	0.912495081	0.919034294	0.918382506	0.923502909	0.932910917	0.941237716	0.946059553
15:07:40.224	0.931633836	0.975938629	0.876192188	0.875362595	0.880109134	0.878520417	0.904116501	0.903054564	0.904121872	0.909243263	0.911106984	0.912420849	0.919056502	0.918340844	0.923570997	0.933089912	0.941347475	0.946222334
15:07:41.088	0.930466465	0.985490507	0.876040191	0.875447613	0.880106987	0.878583449	0.90396163	0.902950928	0.904063256	0.909139944	0.910963925	0.912289419	0.918790436	0.918138227	0.923298307	0.93278186	0.940976042	0.94589583
15:07:41.952	0.929510549	0.975212862	0.876179845	0.875429673	0.880140996	0.878649304	0.90397098	0.902956864	0.904092281	0.909124579	0.910858415	0.912287023	0.918709506	0.918090024	0.923319282	0.932896614	0.940891119	0.946004295
15:07:43.680	0.927184043	0.972610913	0.876263205	0.875394492	0.880114093	0.878454434	0.903818656	0.902839876	0.90408757	0.909017275	0.910756559	0.91206937	0.918462265	0.917830207	0.923033188	0.932592982	0.940719381	0.945724029
15:07:44.544	0.929489494	0.97803044	0.876203739	0.875447471	0.880148422	0.878620213	0.903768363	0.902802167	0.903998139	0.908934514	0.910638945	0.911887059	0.918337963	0.917694778	0.922875532	0.932471975	0.940505011	0.945642427
15:07:45.408	0.929601602	0.977454761	0.876282287	0.875524414	0.880089896	0.878605064	0.903785925	0.90274435	0.904009253	0.908889584	0.910519261	0.91184025	0.918189571	0.917579007	0.922802118	0.932461662	0.940637156	0.945688623
15:07:46.272	0.930047185	0.975849339	0.876224459	0.875525147	0.880084192	0.8785154	0.903641484	0.902693315	0.903953728	0.908848559	0.910490898	0.911716174	0.918111513	0.917501168	0.922787039	0.932587061	0.940610004	0.945785492
15:07:47.136	0.926764821	0.976363236	0.876303039	0.875406032	0.880091178	0.878528903	0.903519204	0.902582574	0.90384642	0.90867171	0.910290967	0.911477075	0.917820235	0.917184817	0.922495679	0.932297985	0.940284496	0.945479991
15:07:48.000	0.928464065	0.974048563	0.876247749	0.875580431	0.88011965	0.878555429	0.903548735	0.902625842	0.903866784	0.908775242	0.910384476	0.911661302	0.918010807	0.917389256	0.922821063	0.932880509	0.940962881	0.946220074
15:07:48.864	0.929048365	0.977269151	0.876288874	0.875557771	0.880069424	0.87850676	0.903379832	0.902490421	0.90376139	0.908635202	0.910159348	0.911404611	0.917673579	0.917125935	0.922505638	0.932586874	0.940597678	0.945893743
15:07:50.592	0.928552297	0.976633812	0.876201487	0.875572818	0.88005534	0.878476425	0.903273824	0.902451415	0.903682429	0.908524316	0.910066826	0.911265597	0.917623449	0.916962114	0.922405677	0.9325486	0.940597943	0.94586381
15:07:51.456	0.928636405	0.977500749	0.87612367	0.875609025	0.880026793	0.878578269	0.903187624	0.90232918	0.903570755	0.908393697	0.909809239	0.911045341	0.917331254	0.916718272	0.922156403	0.932290037	0.940356266	0.945608635
15:07:52.320	0.928223331	0.976053657	0.876189085	0.87557343	0.880045098	0.878429908	0.903107561	0.902290178	0.90352204	0.908356756	0.909825334	0.910997437	0.917236582	0.916636546	0.922126477	0.932342125	0.940363119	0.945675114
15:07:53.184	0.929245789	0.976145814	0.876229139	0.875641187	0.880100757	0.878599455	0.903089332	0.902345892	0.903631357	0.908465749	0.909934802	0.911181759	0.917481124	0.916845575	0.922434437	0.932770441	0.940891184	0.94613532
15:07:54.048	0.929725601	0.97365368	0.876174861	0.875658428	0.880144009	0.878594899	0.903084475	0.902315719	0.903469322	0.908449586	0.90994881	0.911164216	0.917345733	0.916748419	0.922315087	0.932597294	0.940694224	0.945960465
15:07:54.912	0.928960038	0.979669976	0.876250678	0.875775886	0.88019044	0.878771086	0.903128891	0.902433218	0.903615371	0.908670368	0.910066708	0.911513237	0.917750847	0.917054529	0.922738021	0.933098896	0.94125341	0.9465156
15:07:55.776	0.927919621	0.970618596	0.876336742	0.875818456	0.880227925	0.878670954	0.903239444	0.902503469	0.903722683	0.908781598	0.910243701	0.911613996	0.917839147	0.917137343	0.922790305	0.933080574	0.941264625	0.946402094
15:07:56.640	0.927133974	0.971010295	0.876442588	0.875806032	0.880263466	0.878817121	0.903277304	0.902686207	0.903884017	0.909038429	0.910511105	0.912027389	0.9181687	0.917475733	0.923192464	0.933391184	0.941621822	0.946719981
15:07:58.368	0.927377614	0.979606527	0.87626823	0.875948882	0.880386422	0.878834067	0.903389966	0.902752831	0.903974252	0.909172524	0.910659734	0.912220336	0.918185891	0.917560181	0.923211658	0.933279357	0.941481332	0.94648185
15:07:59.232	0.927342305	0.978545535	0.876625466	0.876090085	0.880548052	0.879106064	0.9036862	0.903202572	0.904488557	0.909775921	0.91149611	0.913060675	0.919211012	0.91850811	0.924353043	0.934550809	0.942812592	0.947777648
15:08:00.096	0.929127205	0.974786051	0.876744787	0.876194319	0.880751412	0.879216463	0.903853228	0.903446264	0.904772819	0.910207194	0.911839578	0.913617603	0.919807025	0.919040559	0.925013842	0.93521801	0.943432752	0.948410213
15:09:15.264	0.921823002	0.951772635	0.873215226	0.874364885	0.874125026	0.873072826	0.887140655	0.88626816	0.886250177	0.887295786	0.883469876	0.882726511	0.886601167	0.88626754	0.895302938	0.917702669	0.927138961	0.936394739
15:09:16.128	0.924163221	0.962031702	0.873801614	0.874456432	0.874490651	0.873210894	0.887117851	0.886416731	0.886446632	0.887617923	0.883686313	0.883394339	0.887048772	0.886816966	0.89601837	0.918746368	0.927758724	0.937289458
15:09:16.992	0.922641721	0.962489242	0.874192138	0.87471035	0.874705193	0.873535447	0.887381263	0.886740832	0.886912831	0.888016611	0.884142357	0.883763075	0.887367124	0.887211858	0.896337876	0.918899129	0.927875904	0.937384928
15:09:18.720	0.922031101	0.961402895	0.874246701	0.874849784	0.874933622	0.873644883	0.887699844	0.887139056	0.887245766	0.888609932	0.884900694	0.884676007	0.888067997	0.888043224	0.897317396	0.919883283	0.928425541	0.938316226
15:09:19.584	0.923056962	0.959341015	0.874288751	0.874987317	0.875145387	0.873891409	0.888025122	0.88757102	0.88763795	0.889216415	0.885692802	0.88547908	0.888818552	0.888839664	0.89824233	0.920679245	0.929051458	0.939119397
15:09:20.448	0.922928834	0.965637393	0.874550171	0.875297745	0.875352602	0.874216044	0.888443728	0.888015256	0.888001335	0.889856265	0.886416595	0.886278723	0.889655659	0.889639496	0.899060061	0.921346344	0.929635529	0.939626387
15:09:21.312	0.923826669	0.963054927	0.874725189	0.875400598	0.875565115	0.874405449	0.888740764	0.888397259	0.888574311	0.890339568	0.886903708	0.886742265	0.890147654	0.890115213	0.89929451	0.921095675	0.92916767	0.939130369
15:09:22.176	0.92427641	0.959610135	0.874738333	0.875635267	0.87591953	0.874720528	0.889245	0.889076382	0.889288396	0.89128605	0.887986427	0.887912155	0.891485615	0.891305742	0.900490975	0.922001911	0.930090315	0.93984022
15:09:23.040	0.925190694	0.964646395	0.875053448	0.875974504	0.876284031	0.875172233	0.889931208	0.889895413	0.889999889	0.892471669	0.88945246	0.889619112	0.893113318	0.892892572	0.902233563	0.923567918	0.931552265	0.941221082
15:09:23.904	0.922251093	0.960268912	0.875320486	0.876214114	0.876715947	0.875586305	0.890595673	0.890759893	0.891100065	0.893619227	0.890928733	0.891147614	0.89464245	0.894450251	0.903841892	0.924923832	0.932784048	0.942410167
15:09:24.768	0.926512443	0.958066492	0.87552717	0.876486713	0.877112816	0.876051429	0.891231655	0.891544373	0.892122667	0.894745036	0.89218007	0.892554726	0.896167936	0.895960035	0.905334648	0.926046898	0.933812863	0.943373175
15:09:26.496	0.925073952	0.962121205	0.875770653	0.876689875	0.877390233	0.876373885	0.891804929	0.89222719	0.892892182	0.895701403	0.893290182	0.893701505	0.897375189	0.897103142	0.906365945	0.926539071	0.934053413	0.943563848
15:09:27.360	0.923171952	0.956742358	0.876021581	0.877065383	0.877776937	0.876671997	0.892404662	0.892947511	0.893806742	0.896689263	0.894381037	0.894961892	0.898441135	0.898338124	0.907552253	0.927362606	0.934807082	0.944134326
15:09:28.224	0.924385089	0.962887396	0.876244558	0.877258233	0.878161106	0.877051651	0.892899157	0.89360421	0.894675404	0.897641369	0.895455656	0.896270307	0.899515238	0.899496301	0.908615835	0.928025827	0.935320913	0.944553009
15:09:29.088	0.926319034	0.960818074	0.876458415	0.877582595	0.87850295	0.877364201	0.89349226	0.894350399	0.895460745	0.898655684	0.896635228	0.897474506	0.900989777	0.900844992	0.910055321	0.929172146	0.93641475	0.94555082
15:09:29.952	0.926803959	0.960882796	0.876580056	0.877776691	0.878798566	0.877687813	0.893944963	0.894981017	0.896311651	0.899543784	0.89771194	0.898512922	0.90214453	0.901932969	0.911152323	0.92997772	0.9369811	0.946163908
15:09:30.816	0.927834038	0.964137114	0.876909005	0.878008763	0.879145127	0.878067518	0.894572336	0.895627994	0.896979248	0.900428827	0.898694488	0.899715145	0.903311102	0.90308908	0.912358858	0.931049584	0.937729552	0.946948285
15:09:31.680	0.924020314	0.960409437	0.876914811	0.87821813	0.879383957	0.878298247	0.89494674	0.896062989	0.897626046	0.901067217	0.899458342	0.900480983	0.903885467	0.903884767	0.913111467	0.931505473	0.938049318	0.94729963
15:09:33.408	0.925746755	0.957142099	0.877207984	0.878436831	0.879640189	0.878565763	0.895280697	0.896597678	0.897995968	0.901793506	0.900166414	0.901396799	0.904765581	0.904785647	0.914024083	0.932328561	0.938427219	0.947975448
15:09:34.272	0.925663245	0.96121069	0.87720734	0.878617045	0.879786063	0.87864612	0.895462257	0.896921275	0.898435661	0.902214472	0.900704922	0.90197491	0.905364993	0.905334341	0.914486545	0.932599546	0.938529834	0.948135182
15:09:35.136	0.925429131	0.961873254	0.877336298	0.878713073	0.879965232	0.878893586	0.895666693	0.897187546	0.898614071	0.902613857	0.901204284	0.902321438	0.905882268	0.905862849	0.915063312	0.932949634	0.93882344	0.948408311
15:09:36.000	0.926214785	0.962069155	0.877377678	0.878731822	0.880076795	0.879021978	0.89586445	0.897345944	0.89887076	0.902873585	0.901534897	0.902658881	0.906215896	0.906174758	0.915460982	0.933276947	0.939262507	0.948615555
15:09:36.864	0.924559491	0.964567497	0.877438833	0.878894585	0.880132891	0.879048929	0.895893362	0.897479367	0.899075346	0.903059023	0.901731763	0.90299073	0.906548344	0.906486195	0.91582063	0.933797611	0.939832183	0.949138003
15:09:37.728	0.926513264	0.962718544	0.877386845	0.878842716	0.880081055	0.879029702	0.895760085	0.897352997	0.899026964	0.902916575	0.901561118	0.902828959	0.906315348	0.906224501	0.915534636	0.933496923	0.939433922	0.948765728
15:09:38.592	0.92517972	0.956571007	0.877460399	0.878899988	0.880096203	0.879051364	0.895701433	0.897328502	0.898892825	0.902830507	0.901433262	0.902742921	0.90621957	0.906134746	0.915529989	0.933569602	0.939623529	0.948892777
15:09:39.456	0.923241326	0.961031338	0.877460236	0.878851962	0.880011244	0.878988466	0.895516512	0.897113197	0.898735324	0.9025911	0.901239367	0.902405848	0.905797259	0.905740891	0.91514011	0.933281676	0.939156065	0.948567228
15:09:41.184	0.925910168	0.962788843	0.877502794	0.878922683	0.880040806	0.879047719	0.895402971	0.897067633	0.898647449	0.902501749	0.901128867	0.902370577	0.905834931	0.905717651	0.915212934	0.933568692	0.939543694	0.948890457
15:09:42.048	0.925158779	0.959869232	0.87743338	0.878954037	0.88001936	0.878970585	0.895351302	0.896997576	0.898675327	0.902476633	0.901121248	0.902347838	0.905717344	0.905751638	0.915384107	0.933872158	0.940058802	0.949353184
15:09:42.912	0.923916882	0.961236622	0.877534583	0.879009132	0.879960224	0.878889109	0.895120253	0.89677529	0.89829919	0.902175066	0.900668564	0.901867887	0.905299515	0.90526133	0.914888696	0.933449064	0.939645497	0.948938679
15:09:43.776	0.925657756	0.959118154	0.877464723	0.87892235	0.879860957	0.878790083	0.89491491	0.896525009	0.898010512	0.901814117	0.900219695	0.901295117	0.90472079	0.904703304	0.914294738	0.93296956	0.939160536	0.948489588
15:09:44.640	0.924768803	0.960348543	0.877342476	0.878834689	0.879802803	0.878784708	0.894655911	0.896308354	0.8978281	0.90154665	0.899966673	0.900965357	0.904313894	0.904347061	0.914013238	0.932826873	0.939078849	0.948405688
15:09:45.504	0.925144445	0.954892582	0.877341435	0.878887385	0.879751081	0.878803404	0.89455296	0.896210788	0.897568524	0.901415029	0.899775556	0.900846765	0.904196345	0.904237752	0.914029325	0.933153707	0.939369686	0.948911717
15:09:46.368	0.924093	0.957975539	0.877398433	0.878804394	0.879634405	0.878581843	0.894377959	0.89595209	0.897378921	0.901109781	0.899389244	0.90046878	0.90376662	0.903809618	0.913734856	0.933115644	0.93940391	0.948976456
15:09:47.232	0.923430415	0.957839006	0.877262591	0.87875184	0.87953388	0.878478692	0.894010981	0.895575655	0.896920685	0.90057807	0.898699718	0.899798516	0.902886323	0.90297282	0.912835521	0.932365319	0.938503701	0.948284528
15:09:48.960	0.924972678	0.961397395	0.877255973	0.878716497	0.879395595	0.878417672	0.893801523	0.895358392	0.896645616	0.900226388	0.898240713	0.899344659	0.902350381	0.90247432	0.912350895	0.93213378	0.938285831	0.948090771
15:09:49.824	0.924072262	0.956613035	0.877277471	0.878698755	0.879348275	0.878313929	0.893525556	0.895023794	0.896233958	0.899808131	0.897737681	0.898833629	0.901687847	0.90184795	0.911723199	0.931701689	0.937741381	0.947687102
15:09:50.688	0.922458586	0.955197031	0.877252172	0.878710718	0.879300826	0.878278312	0.89329469	0.894839821	0.896203543	0.899533504	0.897325155	0.898456955	0.901345211	0.901502116	0.911446103	0.931604707	0.937637954	0.94771103
15:09:51.552	0.923604422	0.956063458	0.877240584	0.878611917	0.879137775	0.878083791	0.892911345	0.894430966	0.895636956	0.898979365	0.896663281	0.897637388	0.900539319	0.90067093	0.910518753	0.930725441	0.936612808	0.946871963
15:09:52.416	0.922921125	0.957751297	0.877126996	0.878615395	0.87906224	0.87804173	0.892813247	0.894232689	0.895493205	0.898775842	0.89640075	0.897391046	0.900263344	0.900395417	0.910352876	0.930729268	0.936632916	0.947025949
15:09:53.280	0.922307039	0.962516151	0.877199211	0.87855724	0.879069314	0.877953866	0.892631076	0.894105175	0.895405153	0.89856547	0.896102754	0.897185525	0.900016153	0.90014052	0.910248305	0.930933588	0.936763106	0.947284414
15:09:54.144	0.926344879	0.955708927	0.877144514	0.878658073	0.878962798	0.877924876	0.892470942	0.8939168	0.895069817	0.898303713	0.895769558	0.896808505	0.899716201	0.899727296	0.909828821	0.930672923	0.936467908	0.94704875
15:09:55.872	0.926351354	0.961208197	0.877229765	0.878629129	0.878948624	0.877907968	0.892393751	0.893843502	0.894968548	0.898174638	0.895660711	0.896681414	0.899501393	0.899562684	0.909680408	0.930704629	0.936572764	0.947146528
15:09:56.736	0.925402811	0.957779363	0.877324558	0.878683302	0.878991573	0.878058763	0.892365262	0.893816066	0.895092284	0.898170246	0.895652475	0.896577591	0.899402755	0.899490638	0.909741955	0.930906268	0.936765882	0.947416978
15:09:57.600	0.924579329	0.963773719	0.877204129	0.878717176	0.878954299	0.877917133	0.892214269	0.893719504	0.894888854	0.898052082	0.895434382	0.896382453	0.899144869	0.899222043	0.909497006	0.930657418	0.936632969	0.947204977
15:09:58.464	0.926077754	0.955985058	0.877322879	0.87873378	0.879018945	0.877928696	0.89219838	0.893718378	0.894918838	0.898030405	0.895391068	0.896315457	0.899132741	0.899230706	0.909578679	0.930939893	0.937012987	0.947574071
15:09:59.328	0.92684435	0.957266454	0.877259814	0.878841963	0.878961957	0.877952779	0.892047585	0.893552939	0.894724659	0.897788661	0.895115728	0.89601153	0.89882164	0.89885268	0.909155935	0.930665852	0.936514658	0.947288392
15:11:15.360	0.927230259	0.9466919	0.877460698	0.878867461	0.875825412	0.875110399	0.881578793	0.88179968	0.881633973	0.881248027	0.874786995	0.874441358	0.876120043	0.87627031	0.888571464	0.919851047	0.92547168	0.940045724
15:11:16.224	0.925074738	0.94791314	0.877546623	0.87895716	0.876021558	0.875132318	0.881606646	0.881825979	0.881433689	0.881338592	0.874975523	0.874570884	0.876313187	0.876483767	0.888918547	0.920449938	0.925817092	0.940680445
15:11:17.088	0.924617897	0.949295032	0.87759886	0.879131561	0.876132841	0.875330232	0.8816898	0.881854469	0.88129851	0.881315609	0.874943218	0.874479062	0.876178206	0.876341095	0.888708151	0.920193466	0.925447033	0.940352624
15:11:17.952	0.924333397	0.947280674	0.877787521	0.879106648	0.876069454	0.875206182	0.881597808	0.881688265	0.881299472	0.881044551	0.874554807	0.874008312	0.875653106	0.875865286	0.888077797	0.919295698	0.924654454	0.93940681
15:11:19.680	0.924412221	0.946497342	0.877738607	0.87908814	0.876085603	0.87525348	0.881434605	0.881525265	0.881004552	0.880800158	0.87420803	0.873581902	0.875142909	0.875383309	0.887414898	0.918551128	0.923919027	0.938530579
15:11:20.544	0.925359002	0.947452012	0.877962893	0.879291384	0.876167359	0.875316298	0.881591174	0.881692244	0.881157291	0.881026704	0.874463056	0.873873399	0.875540155	0.875730838	0.887946932	0.919219025	0.924586402	0.939334455
15:11:21.408	0.922561475	0.950274982	0.877830674	0.879341171	0.87629455	0.875420667	0.881657367	0.881857311	0.881243272	0.881297328	0.874901531	0.874392581	0.87603325	0.87619221	0.888600634	0.920179107	0.925292859	0.940416009
15:11:22.272	0.924758629	0.945620752	0.877959338	0.879334582	0.876286431	0.875503987	0.88172589	0.881853054	0.881328906	0.881254139	0.874849427	0.8742758	0.875948002	0.876148519	0.888531335	0.920197162	0.925303025	0.94044445
15:11:23.136	0.925239551	0.950943621	0.878111022	0.879450067	0.876341528	0.875422462	0.881697517	0.881811705	0.881194684	0.881203582	0.874708633	0.874199147	0.875832537	0.876005649	0.888391726	0.920117602	0.925328501	0.940353413
15:11:24.000	0.923214703	0.945359172	0.878039594	0.879423507	0.876314515	0.875366956	0.881660535	0.881704141	0.881083091	0.881002142	0.874466678	0.873922755	0.87557327	0.875745076	0.888091554	0.919805519	0.925015131	0.940073574
15:11:24.864	0.925032087	0.941886062	0.87816958	0.879465424	0.876291166	0.875440441	0.881493906	0.881629812	0.881080637	0.880898691	0.874320616	0.873813077	0.875441252	0.875598773	0.888007018	0.919806174	0.925058707	0.940157286
15:11:25.728	0.922168456	0.943014079	0.878018554	0.879467493	0.876300016	0.875456906	0.881397634	0.881476033	0.880846011	0.880660279	0.874089186	0.873530451	0.875181167	0.875305204	0.887699743	0.919606236	0.92481636	0.939974376
15:11:27.456	0.921907028	0.948156192	0.878072188	0.87951695	0.876240826	0.875362424	0.881231746	0.881289297	0.880677902	0.880396077	0.873716988	0.873173608	0.87480079	0.874958964	0.887384913	0.919431935	0.924693851	0.939861349
15:11:28.320	0.924184372	0.946005419	0.878072332	0.879435675	0.876172512	0.875337242	0.881152851	0.881162159	0.880474274	0.880242742	0.873595623	0.87297654	0.874613739	0.874780611	0.887324541	0.919650307	0.924963956	0.940147878
15:11:29.184	0.923852526	0.941832771	0.87793948	0.879469079	0.876145643	0.875355202	0.881035658	0.881011128	0.88017448	0.880011133	0.8733053	0.872695514	0.874306857	0.874492834	0.887117845	0.9196387	0.925106483	0.940255189
15:11:30.048	0.922843696	0.943078935	0.877918001	0.879393575	0.876001242	0.875174248	0.880700471	0.880612666	0.879814804	0.879437556	0.872580975	0.871827569	0.873399912	0.873633054	0.886147518	0.918707039	0.924185256	0.939359722
15:11:30.912	0.923874225	0.945105636	0.877974059	0.879310714	0.875932835	0.875132535	0.880494924	0.880332835	0.879492603	0.879037628	0.872086121	0.871301438	0.872807586	0.87309072	0.885608836	0.918306291	0.923919419	0.939016228
15:11:31.776	0.92350937	0.943382689	0.877920199	0.879398419	0.875836233	0.875075275	0.880338906	0.880110559	0.879180936	0.878697374	0.871611567	0.870883556	0.872337308	0.872611913	0.88507617	0.917914	0.923348742	0.938668474
15:11:32.640	0.924106141	0.943398299	0.878082296	0.879363413	0.875771896	0.874952996	0.88014271	0.879901266	0.879012418	0.878362504	0.871185917	0.870361656	0.871738282	0.872018256	0.884345574	0.917107853	0.922637679	0.93779453
15:11:34.368	0.923316782	0.946980561	0.878049249	0.879345723	0.875819788	0.874948407	0.880100583	0.879879831	0.878927143	0.878334342	0.871205422	0.870385534	0.871717845	0.872016109	0.884443287	0.917324881	0.922703644	0.937998988
15:11:35.232	0.925316169	0.950485585	0.878199362	0.879408922	0.87592188	0.875044486	0.880218608	0.88001208	0.879104161	0.878449415	0.871364902	0.870555498	0.871916708	0.872206433	0.884639226	0.917639302	0.923009154	0.938375576
15:11:36.096	0.924295891	0.949662053	0.878165337	0.879484282	0.87609002	0.875187376	0.880328843	0.88012331	0.879251524	0.878672425	0.871586761	0.870721044	0.872166762	0.87244144	0.884946946	0.917832717	0.923197503	0.938625133
15:11:36.960	0.923755509	0.9468302	0.878346209	0.879634369	0.876119555	0.875263214	0.880454739	0.880252331	0.879317932	0.87882312	0.871678973	0.870902203	0.872461003	0.872626263	0.885137306	0.91807307	0.923415872	0.93880773
15:11:37.824	0.924116548	0.943708464	0.878394907	0.87969795	0.876160663	0.875296519	0.88045675	0.880312106	0.87933022	0.878850797	0.871743522	0.870913224	0.872423611	0.872629819	0.885057998	0.918000856	0.923336109	0.938722184
15:11:38.688	0.925438914	0.945460903	0.878386432	0.879784218	0.876206174	0.875423938	0.880534302	0.880388811	0.879611325	0.878975985	0.871937141	0.871094952	0.872615402	0.872799079	0.88528807	0.918375308	0.923689096	0.939079412
15:11:39.552	0.925584991	0.944488592	0.878411046	0.879806065	0.876266966	0.875456411	0.880534052	0.880369261	0.879519195	0.878929995	0.871814011	0.871073847	0.872535588	0.872680846	0.885133887	0.918086776	0.923393498	0.938738521
15:11:40.416	0.92384938	0.942053184	0.878561143	0.879845064	0.876344098	0.87546631	0.880566519	0.880398832	0.879621618	0.87895448	0.871810065	0.871087561	0.872558058	0.872722255	0.885165393	0.918128703	0.923334535	0.938728749
15:11:42.144	0.922755667	0.943886063	0.878598638	0.879924964	0.876402017	0.875468493	0.88058684	0.880451325	0.879673586	0.878977671	0.87181389	0.871082827	0.872503463	0.872738311	0.885155659	0.918130865	0.923245094	0.938681609
15:11:43.008	0.923535576	0.948466686	0.878609176	0.879998732	0.876413244	0.875651424	0.880656588	0.880514458	0.879670986	0.879091605	0.871911723	0.871382011	0.87273065	0.872879463	0.885463535	0.918530334	0.923576856	0.93907853
15:11:43.872	0.924882095	0.943055776	0.878737968	0.8800207	0.876520096	0.875704763	0.880719595	0.88060053	0.879847864	0.879200937	0.872141405	0.871642338	0.872924711	0.873074269	0.885742059	0.918828556	0.923875528	0.939388486
15:11:44.736	0.924094015	0.943168546	0.878808056	0.88008996	0.876547753	0.875744287	0.880807681	0.880663237	0.879947209	0.879294771	0.872285888	0.871744944	0.873072617	0.87322082	0.885844131	0.918972619	0.923984602	0.939508285
15:11:45.600	0.923227208	0.939054221	0.87892125	0.880235782	0.876679396	0.87587931	0.880917788	0.880796963	0.880127399	0.879478274	0.87253603	0.872046176	0.873349809	0.873562838	0.886238185	0.919450191	0.924485836	0.940005126
15:11:46.464	0.922418825	0.940810818	0.878899174	0.880338511	0.876776036	0.875926131	0.880969933	0.880818832	0.880242985	0.879521616	0.872523196	0.871973855	0.873330316	0.873547116	0.886146447	0.919247254	0.92434611	0.939696011
15:11:47.328	0.922731542	0.948155514	0.879029554	0.88041499	0.876845571	0.876067927	0.881085102	0.880978712	0.880370115	0.879715993	0.87282976	0.872281363	0.873569907	0.873887249	0.886579011	0.919709468	0.924878351	0.940179988
15:11:48.192	0.924053339	0.942086162	0.879117042	0.880497243	0.876945952	0.876086974	0.881191932	0.881117225	0.880586102	0.879841211	0.8729355	0.872493662	0.873688891	0.874034731	0.886741617	0.919861013	0.924854091	0.940237377
15:11:49.920	0.92498007	0.945315695	0.879154311	0.880512754	0.876955214	0.876237528	0.881210561	0.881179523	0.880591717	0.879952086	0.872982535	0.872569121	0.873701957	0.874138053	0.886833844	0.919865632	0.924757496	0.940191746
15:11:50.784	0.923414862	0.942395364	0.879212355	0.880652597	0.877031712	0.876191345	0.881300613	0.881249684	0.88066632	0.88003824	0.873059465	0.872571463	0.873737895	0.874169688	0.886723083	0.919539658	0.924357723	0.939770928
15:11:51.648	0.924877149	0.942496456	0.879370669	0.880738629	0.877203647	0.876252118	0.881490976	0.881458677	0.880941516	0.880297692	0.87335139	0.872864985	0.874099127	0.874549084	0.887134296	0.919938084	0.924682792	0.94010221
15:11:52.512	0.925352365	0.948151818	0.879557033	0.88087929	0.877301807	0.876572866	0.881723327	0.881691396	0.88125104	0.880596187	0.873850281	0.873261054	0.874589329	0.875009553	0.887617994	0.920407316	0.925161359	0.940524328
15:11:53.376	0.924537862	0.944889514	0.879518463	0.880894324	0.877437393	0.876668748	0.881885439	0.88191614	0.881557609	0.8809271	0.874166206	0.873643667	0.875088369	0.875419294	0.888049167	0.920766891	0.925362025	0.940776515
15:11:54.240	0.922622725	0.945505752	0.879726662	0.881056715	0.877530715	0.876729551	0.882042934	0.881983145	0.881729956	0.881060355	0.874351824	0.873866947	0.875258347	0.875558313	0.888156866	0.920665597	0.925216355	0.940516375
15:11:55.104	0.923638755	0.942526629	0.879814918	0.881171014	0.877729408	0.876977688	0.882243073	0.882287994	0.882081322	0.881463083	0.874728625	0.874508528	0.875929253	0.876176424	0.888894225	0.9214339	0.925907588	0.941312149
15:11:56.832	0.923998598	0.944142928	0.879903189	0.881312507	0.877821092	0.877000846	0.882269205	0.882359986	0.88212967	0.881550081	0.87486144	0.874553521	0.876020956	0.876282518	0.888932338	0.921309467	0.925755411	0.94116194
15:11:57.696	0.924510005	0.950520273	0.879958625	0.881367861	0.877926882	0.877090667	0.882472176	0.88256001	0.882322095	0.881780486	0.875147424	0.87497651	0.876379203	0.876662331	0.889389787	0.921818236	0.92625264	0.941728352
15:11:58.560	0.925983364	0.949043543	0.880131883	0.881391089	0.878008753	0.877168784	0.882499838	0.882626605	0.882436018	0.881890801	0.875371333	0.875067592	0.876561384	0.876825896	0.889571297	0.921880221	0.926337689	0.941746472
15:11:59.424	0.925091479	0.94313388	0.880191578	0.881482659	0.878066458	0.87727054	0.882622223	0.882775367	0.882517785	0.882057717	0.875567897	0.875270466	0.876784761	0.877031992	0.889742669	0.922074892	0.926461517	0.941918328
15:12:00.288	0.923817468	0.941583179	0.880098452	0.881563696	0.878155245	0.877272216	0.882716274	0.882809277	0.882550619	0.88215255	0.87571532	0.875333533	0.876871991	0.877153021	0.889881655	0.922304398	0.926708098	0.942128298
15:13:15.456	0.92482187	0.943525241	0.882602239	0.883637574	0.878337572	0.877855863	0.878919606	0.878020147	0.876769912	0.87487872	0.866981898	0.866168472	0.867322358	0.867723163	0.881845563	0.918636175	0.922330555	0.939585485
15:13:17.184	0.925216808	0.935465314	0.882574339	0.883894361	0.87860841	0.87791247	0.879127208	0.87819564	0.876876774	0.875088375	0.867276835	0.866453483	0.867628682	0.867990598	0.881957054	0.918450645	0.92204664	0.939378082
15:13:18.048	0.926457193	0.938490999	0.882862875	0.884166766	0.8789246	0.878229325	0.879540167	0.878653611	0.877418037	0.87566614	0.867837316	0.8671517	0.868398787	0.868683413	0.882589017	0.918912093	0.922363191	0.939649398
15:13:18.912	0.925801307	0.939777806	0.883056588	0.884314339	0.879121411	0.878386433	0.879816801	0.878949237	0.877735418	0.876045677	0.868320762	0.867614084	0.868884825	0.869205336	0.883091951	0.919295094	0.922789834	0.939901513
15:13:19.776	0.92505756	0.937010678	0.883310629	0.884493274	0.879330706	0.878696007	0.880151039	0.879353365	0.878201669	0.876613277	0.869104212	0.868313858	0.86960961	0.869909238	0.883919599	0.919963224	0.923305185	0.940608511
15:13:20.640	0.924912349	0.938290911	0.883343776	0.884696313	0.879542102	0.878793797	0.880462953	0.879688695	0.878706714	0.877073421	0.869644278	0.869053897	0.870118779	0.870582561	0.884611208	0.920624449	0.923962978	0.941171012
15:13:21.504	0.926557801	0.935380516	0.883521497	0.884791433	0.879668224	0.879068625	0.880678283	0.879932606	0.878966041	0.877340042	0.869943915	0.869362852	0.870418702	0.870938137	0.884884455	0.920777399	0.924042787	0.94122194
15:13:22.368	0.924879161	0.939987774	0.883601432	0.884875661	0.879813232	0.879192831	0.880829162	0.880055257	0.879116822	0.877502607	0.870087801	0.869508115	0.870552151	0.871043327	0.884860687	0.920495981	0.923620636	0.9407809
15:13:23.232	0.926371472	0.931288886	0.883773779	0.885048194	0.880014228	0.879355244	0.881100158	0.880417749	0.879457095	0.878018692	0.870786777	0.87032161	0.87142692	0.871863223	0.885884417	0.921687058	0.924763864	0.941966037
15:13:24.960	0.928112243	0.942568914	0.883825785	0.885114436	0.880104474	0.879514828	0.881257389	0.880535027	0.879628239	0.87817835	0.870996256	0.870525128	0.871566	0.87205222	0.88600495	0.921646241	0.924556633	0.94186515
15:13:25.824	0.925832102	0.939693887	0.88390201	0.885211063	0.88018974	0.879460867	0.881317857	0.880600773	0.879682351	0.878229787	0.870978425	0.870524164	0.871575957	0.872039364	0.885887826	0.921360786	0.924124435	0.941435416
15:13:26.688	0.9246865	0.937628944	0.884005823	0.885329034	0.880319485	0.879562295	0.88142974	0.880797814	0.879888125	0.878484166	0.871214506	0.870814758	0.871912533	0.87235461	0.886216246	0.921624009	0.924245905	0.941687099
15:13:27.552	0.925892664	0.936441466	0.884184697	0.885484561	0.880413793	0.879820004	0.881614369	0.880956986	0.880089548	0.878679782	0.871428401	0.870958571	0.872118357	0.872535625	0.886309415	0.9215822	0.924089865	0.941526918
15:13:28.416	0.926438134	0.938631446	0.884255347	0.885575551	0.880552356	0.879867706	0.881735157	0.881087509	0.880088939	0.878781119	0.871539472	0.871064344	0.872185326	0.872633361	0.886321038	0.921406455	0.923710269	0.941245206
15:13:29.280	0.926451836	0.937008959	0.884262744	0.885621736	0.880606822	0.87998058	0.881763584	0.881115316	0.880046583	0.87875143	0.871419985	0.870929489	0.872120035	0.872501363	0.885984823	0.920825513	0.923102716	0.940525974
15:13:30.144	0.926940679	0.936722477	0.884356727	0.885779013	0.880760596	0.880139659	0.881960559	0.881310971	0.880245647	0.879031378	0.871853206	0.871351304	0.872567173	0.87294502	0.886545148	0.921506239	0.923667514	0.941194699
15:13:31.872	0.926496029	0.938495733	0.884551346	0.885964355	0.880883376	0.88019137	0.882225635	0.881622616	0.88060083	0.879423006	0.872277833	0.871907048	0.873236178	0.873541564	0.88728893	0.92230895	0.924588999	0.942113653
15:13:32.736	0.92595265	0.936757273	0.884718374	0.886041796	0.881065983	0.880408572	0.882467276	0.881811619	0.880817968	0.879684467	0.872592806	0.872184393	0.87358128	0.873898572	0.887677678	0.922626332	0.924837563	0.942443935
15:13:33.600	0.928497191	0.931067647	0.884827121	0.886088097	0.881212951	0.880504132	0.882580434	0.882026409	0.881079463	0.879954103	0.872862815	0.872570243	0.873900926	0.874296112	0.888101192	0.923062974	0.925278111	0.94281037
15:13:34.464	0.926587245	0.93908385	0.884883139	0.886232887	0.881363952	0.880673913	0.882851754	0.88227109	0.881429804	0.880295131	0.87328865	0.873128503	0.874432724	0.874844418	0.888778437	0.923802035	0.926053147	0.943596719
15:13:35.328	0.926690098	0.934456294	0.885090243	0.886406364	0.881470749	0.880836688	0.882988546	0.882430731	0.881546099	0.880481421	0.873519166	0.873383529	0.874642744	0.875031907	0.888877957	0.923817427	0.925965109	0.943508609
15:13:36.192	0.925132978	0.93756339	0.885081741	0.886517956	0.881576092	0.880947467	0.883191671	0.882644525	0.881807871	0.880759	0.873851098	0.873751505	0.874928943	0.875342958	0.889194902	0.924000943	0.926054983	0.943645005
15:13:37.056	0.930082876	0.941729026	0.88530762	0.886646313	0.881783441	0.881152429	0.883484195	0.882951016	0.882051575	0.881167023	0.874309484	0.874276944	0.875516077	0.87589133	0.889743808	0.924426229	0.926598981	0.944030805
15:13:37.920	0.926861431	0.93577421	0.88531615	0.886772651	0.881968788	0.881259463	0.883604771	0.883157408	0.882269908	0.881413916	0.8745113	0.87452935	0.875720293	0.876126551	0.889891268	0.924292494	0.92637139	0.943713966
15:13:39.648	0.926687016	0.938076061	0.885546179	0.886886972	0.882109245	0.881419186	0.883842549	0.883462769	0.882596945	0.881821334	0.875003787	0.875029067	0.876345841	0.876663487	0.890410533	0.92473018	0.926708269	0.944096416
15:13:40.512	0.92641381	0.937398173	0.885678	0.887055155	0.882288722	0.881678236	0.884141781	0.883740157	0.882859447	0.882205748	0.875485188	0.875515496	0.876849433	0.877145985	0.890867398	0.925032596	0.926954366	0.944308838
15:13:41.376	0.92759706	0.940039849	0.88576674	0.887221666	0.882551796	0.88183115	0.884439952	0.884132601	0.883263549	0.882707367	0.876083649	0.876041998	0.877565004	0.877822336	0.891582028	0.925630017	0.927337047	0.944827753
15:13:42.240	0.92598719	0.938111742	0.885923873	0.88727332	0.882650203	0.881975498	0.884671022	0.884339283	0.883548731	0.882910469	0.876313101	0.876251716	0.877721408	0.877972174	0.891596187	0.925313297	0.926821085	0.944349025
15:13:43.104	0.925295471	0.937932016	0.885972713	0.887525554	0.882863058	0.882200378	0.884931991	0.884676759	0.883944925	0.883400925	0.876854834	0.87700413	0.878333112	0.878673308	0.892364328	0.92608427	0.927482487	0.945076178
15:13:43.968	0.929152933	0.938425559	0.88609101	0.8875675	0.88302204	0.882298358	0.885144681	0.884862642	0.884163826	0.883639277	0.877118747	0.877332707	0.878602844	0.878987036	0.892650029	0.926187739	0.927581076	0.945093314
15:13:44.832	0.928734667	0.934898509	0.88618059	0.887715812	0.883176202	0.882508504	0.885358031	0.885124593	0.884441866	0.883990102	0.877592698	0.877790643	0.879005665	0.879486061	0.89320257	0.926809776	0.927967512	0.945587686
15:13:45.696	0.92619334	0.941833915	0.886435914	0.887882217	0.883304464	0.88270474	0.885567766	0.885395562	0.884856296	0.88432451	0.87794387	0.878115254	0.879417715	0.87992322	0.893676374	0.927185197	0.928277742	0.94588921
15:13:47.424	0.927758001	0.938459932	0.886503784	0.888010113	0.883468941	0.882808866	0.885744442	0.885589222	0.885066261	0.884577108	0.878228213	0.878456686	0.879793947	0.880245363	0.893949627	0.92733641	0.928561482	0.945987272
15:13:48.288	0.92831367	0.940815813	0.886612568	0.888125564	0.883601502	0.882967469	0.885974129	0.885804252	0.885348037	0.884852233	0.878651736	0.878818519	0.880252243	0.88066259	0.894430715	0.927882005	0.928971158	0.946529027
15:13:49.152	0.928373666	0.937758253	0.886682622	0.888168953	0.883662068	0.883035975	0.885998608	0.885878499	0.885407554	0.884946644	0.878776079	0.878847825	0.880258733	0.880661458	0.894349215	0.927648647	0.928668487	0.946233827
15:13:50.016	0.928929061	0.938601211	0.886823227	0.888299263	0.883836673	0.88322794	0.886237622	0.886134212	0.885662965	0.885231253	0.879207365	0.87932712	0.880752811	0.881098217	0.894905271	0.928296994	0.929276953	0.946852605
15:13:50.880	0.929455113	0.937665545	0.886939403	0.88847178	0.883931564	0.883148235	0.886289738	0.886196922	0.885769209	0.885247973	0.879217402	0.879284557	0.880712042	0.881066589	0.894746891	0.928000668	0.928926052	0.946435566
15:13:51.744	0.928565116	0.936334986	0.886962287	0.888518441	0.884061901	0.883397885	0.886471923	0.886320019	0.885908194	0.885421394	0.879369076	0.879433013	0.880875242	0.881266605	0.894899362	0.928099669	0.929050673	0.946546905
15:13:52.608	0.928060786	0.938471266	0.887166083	0.888631859	0.884098298	0.883536435	0.886592018	0.886444007	0.88588058	0.885541158	0.87952609	0.879486387	0.881004831	0.881394909	0.894973138	0.928139658	0.92914056	0.946588603
15:13:54.336	0.927211069	0.934581696	0.887232201	0.888728094	0.88423391	0.883644279	0.886726273	0.886603128	0.886147005	0.885773208	0.879681184	0.879755248	0.881235163	0.881633478	0.895238145	0.928270875	0.929164085	0.946714278
15:13:55.200	0.927733815	0.939764677	0.887315348	0.888802398	0.884389208	0.883701655	0.886765536	0.886713747	0.886246061	0.885855184	0.879754727	0.879742144	0.8812281	0.881585125	0.895051063	0.927881507	0.928587688	0.946099895
15:13:56.064	0.929635264	0.939609593	0.887369642	0.88898016	0.884579671	0.88391339	0.887070915	0.887008998	0.886619597	0.886233401	0.880084664	0.880317825	0.881773428	0.882087797	0.895675744	0.928453202	0.929078354	0.946699124
15:13:56.928	0.928701289	0.944565116	0.887539109	0.88915877	0.884819848	0.884117046	0.887442438	0.887394946	0.887072698	0.886809922	0.880898472	0.881193774	0.882519965	0.883004982	0.896769647	0.929774781	0.930559366	0.948088943
15:13:57.792	0.927972108	0.937682279	0.887796364	0.889291088	0.884945141	0.88422126	0.8876576	0.887616837	0.887419471	0.887047586	0.881124482	0.881474834	0.882779635	0.883297418	0.897015798	0.929900129	0.9305362	0.948128803
15:13:58.656	0.929202275	0.943594719	0.887859556	0.889288776	0.884948408	0.884401141	0.887644526	0.887644021	0.887360796	0.887024615	0.881063865	0.881249323	0.882587212	0.883100106	0.896575707	0.929135628	0.92959631	0.947116092
15:13:59.520	0.926983798	0.945071428	0.887904799	0.889434473	0.885112595	0.884551767	0.887810862	0.887891669	0.887552034	0.887341869	0.881466635	0.8816659	0.882970963	0.883500876	0.896989698	0.929428619	0.9297978	0.947394225
15:15:15.552	0.935886306	0.931646893	0.889645095	0.89076943	0.8839341	0.883376365	0.881027549	0.878895646	0.876807608	0.874097804	0.865484382	0.864889983	0.866250942	0.86660057	0.881327898	0.919973598	0.920528888	0.94081676
15:15:16.416	0.929207653	0.936071797	0.889653884	0.890864167	0.883960481	0.883340971	0.881152995	0.879161632	0.877252291	0.874478877	0.866167119	0.865390135	0.866748925	0.867107544	0.881967978	0.92054497	0.921374909	0.941424136
15:15:17.280	0.929137302	0.940979082	0.890057584	0.891260929	0.884402341	0.88377751	0.881762885	0.879787411	0.877877876	0.875308899	0.867219284	0.866577977	0.867866964	0.868142768	0.883136503	0.921635089	0.922451161	0.942399715
15:15:18.144	0.928504778	0.934239517	0.890262993	0.891482697	0.884691632	0.884128318	0.882148851	0.880293798	0.878333305	0.875931684	0.867824213	0.86728471	0.868484954	0.868947725	0.883762934	0.921852622	0.922737617	0.942410826
15:15:19.008	0.928122023	0.933957125	0.890479489	0.891728965	0.885048962	0.884462159	0.882778208	0.881065284	0.879288587	0.876980551	0.869207767	0.868628195	0.869768967	0.870303707	0.885053529	0.922729859	0.923399032	0.942940808
15:15:20.736	0.929340029	0.932097842	0.890934481	0.892188925	0.885659097	0.885022225	0.883753646	0.882215993	0.880625944	0.878542811	0.870987767	0.870719465	0.871928388	0.872452835	0.887285137	0.924702157	0.92523422	0.944693886
15:15:21.600	0.930238356	0.940428409	0.891124807	0.89257411	0.886155495	0.885534537	0.884591373	0.883199855	0.881771525	0.879852286	0.872495526	0.872361038	0.873584312	0.874049624	0.888714551	0.92550727	0.925966273	0.945160105
15:15:22.464	0.930766438	0.936145068	0.891563596	0.893020036	0.886783062	0.886102013	0.885639698	0.884378144	0.883099714	0.881443775	0.874413122	0.874317534	0.87550882	0.876089469	0.890754965	0.926936261	0.927223613	0.946368191
15:15:23.328	0.928215392	0.934160158	0.891952918	0.893368129	0.887375549	0.88679152	0.886595708	0.885531822	0.884522015	0.882975248	0.876106525	0.876202199	0.877580015	0.878042611	0.892661447	0.928350171	0.928366387	0.94752494
15:15:24.192	0.931532508	0.936072986	0.892242022	0.893725113	0.8878801	0.88730549	0.887364386	0.886452343	0.885455027	0.884163651	0.877449025	0.877769143	0.879056678	0.87944842	0.893926054	0.928987535	0.928732443	0.947803372
15:15:25.056	0.929299292	0.933815676	0.892682785	0.894075535	0.888377618	0.887785298	0.888195768	0.887436574	0.886568688	0.885484581	0.879041947	0.879481355	0.880740491	0.881231788	0.895746772	0.930518061	0.930009025	0.949019846
15:15:25.920	0.931245796	0.938646848	0.892877836	0.894359196	0.88876956	0.888114746	0.888886523	0.888169285	0.887325502	0.886486547	0.880185115	0.880635415	0.882044869	0.882516754	0.896953423	0.931342104	0.930699542	0.949613727
15:15:26.784	0.931986465	0.940797314	0.893291776	0.8946547	0.889125956	0.888524139	0.889432938	0.888807226	0.888080491	0.887354567	0.881237551	0.881836897	0.883322585	0.883712087	0.898216902	0.932400351	0.931626705	0.950583922
15:15:28.512	0.932530483	0.941088589	0.893259645	0.894833533	0.889291349	0.888740872	0.889662373	0.8890519	0.888321849	0.887657321	0.881547147	0.882113011	0.883549442	0.88396428	0.898357777	0.932255894	0.93145458	0.950206254
15:15:29.376	0.932810528	0.936690755	0.893403141	0.894912631	0.889362747	0.888814193	0.889778593	0.88923502	0.888512056	0.88786677	0.881793818	0.882369264	0.883851645	0.884227417	0.898569382	0.932319523	0.931245708	0.950247896
15:15:30.240	0.930969809	0.941893524	0.893511902	0.894948827	0.889458667	0.888843345	0.889838887	0.889291796	0.888581764	0.887909482	0.881857652	0.882366687	0.883850991	0.884211357	0.898519101	0.932107672	0.931167428	0.94999959
15:15:31.104	0.933247289	0.942798022	0.893603543	0.895106219	0.889577849	0.889026615	0.889994207	0.889428672	0.888783318	0.888093476	0.882245406	0.882712758	0.884133788	0.884521292	0.898862716	0.932568426	0.931428112	0.950441581
15:15:31.968	0.933386037	0.942115962	0.893670871	0.895123568	0.889623622	0.888991747	0.8899466	0.889437604	0.888721719	0.88804755	0.882147636	0.882593529	0.883951727	0.884371175	0.89862974	0.932210664	0.931023763	0.950029905
15:15:32.832	0.93302866	0.937455991	0.893696074	0.895156158	0.88969144	0.889162997	0.890043716	0.889506097	0.888765087	0.88811319	0.88221102	0.882600187	0.884037792	0.884414278	0.8986665	0.932138708	0.93093286	0.949979422
15:15:33.696	0.93134455	0.941615709	0.893874698	0.895336784	0.889890181	0.889299374	0.890334769	0.889818585	0.889096067	0.888590858	0.882712848	0.883257189	0.884682303	0.885158583	0.899551447	0.933207173	0.932085992	0.951044534
15:15:34.560	0.93215013	0.941310872	0.893929952	0.895507886	0.890101827	0.889527273	0.890613215	0.890111901	0.889476565	0.888964699	0.883176203	0.883670585	0.885141918	0.885624966	0.900025602	0.933468722	0.9323303	0.95128473
15:15:36.288	0.932902939	0.936585862	0.894168458	0.895771594	0.890362132	0.889743797	0.890997573	0.890524802	0.889897242	0.889525009	0.883817286	0.884339435	0.885856331	0.886388045	0.900794163	0.934058279	0.932870714	0.95174032
15:15:37.152	0.933917494	0.944952844	0.894451366	0.895924958	0.890621627	0.890047037	0.89133533	0.890976288	0.890434013	0.890098604	0.88453601	0.885118776	0.886597965	0.887116798	0.901416352	0.934376681	0.933151075	0.951882848
15:15:38.016	0.931934057	0.9386299	0.89457701	0.896179492	0.890911744	0.890340011	0.891910674	0.891616211	0.891183188	0.890961429	0.885603232	0.886216892	0.887787773	0.888223692	0.902529323	0.93520602	0.933886839	0.952570412
15:15:38.880	0.931915058	0.938574627	0.894733589	0.896380769	0.891278116	0.890667431	0.892410415	0.892214379	0.891842181	0.89173793	0.88657561	0.887168806	0.888722452	0.889159388	0.903354696	0.935664766	0.934250406	0.952790011
15:15:39.744	0.93396264	0.940992056	0.895196443	0.896694753	0.891704962	0.891117697	0.89308913	0.892935011	0.892658813	0.892658507	0.88758033	0.888316014	0.88994066	0.890355453	0.904529122	0.93654772	0.935046431	0.953564492
15:15:40.608	0.931874434	0.939037563	0.895361835	0.896960474	0.892056661	0.891535462	0.893624911	0.893619788	0.893394047	0.893553375	0.88859788	0.889383073	0.890848852	0.891467348	0.90554848	0.93730852	0.935586376	0.953976117
15:15:41.472	0.93383239	0.944081347	0.895652047	0.897214401	0.8924525	0.891872795	0.894255678	0.894309215	0.894257039	0.894486498	0.889583038	0.890575062	0.892083327	0.892578419	0.906644513	0.938130828	0.936333862	0.954604727
15:15:43.200	0.931956303	0.940426123	0.895963277	0.897577837	0.892831648	0.892268906	0.894852852	0.895023988	0.894897098	0.895421689	0.890678383	0.891842244	0.893250878	0.893763554	0.907812929	0.938928283	0.937111346	0.955267331
15:15:44.064	0.934920935	0.939617961	0.89620997	0.897763684	0.893143858	0.892585718	0.895353615	0.895606509	0.895595487	0.896209184	0.89164339	0.89275322	0.894361099	0.894794086	0.908800767	0.939605855	0.937655913	0.955828775
15:15:44.928	0.933649794	0.942061278	0.896339935	0.898020659	0.893417378	0.892829327	0.895766685	0.896110218	0.89598533	0.896838409	0.892251456	0.893533332	0.895145435	0.895555507	0.909522784	0.940002504	0.937915857	0.95610672
15:15:45.792	0.932814768	0.9443052	0.896542948	0.898164128	0.893514078	0.893046949	0.896000898	0.896276797	0.896184441	0.897065882	0.892545888	0.893749877	0.895324707	0.895775757	0.909558411	0.939794259	0.937649667	0.95573398
15:15:46.656	0.934960275	0.942232111	0.896709075	0.898342321	0.893735676	0.893237376	0.896230938	0.896603932	0.896621903	0.897477473	0.8930921	0.894280536	0.89577657	0.896368959	0.910276366	0.940564038	0.938254116	0.956469809
15:15:47.520	0.934986623	0.941656736	0.896722519	0.898338918	0.893742304	0.893191482	0.896171658	0.896488695	0.896401129	0.89731585	0.892856604	0.894032561	0.895622122	0.896113068	0.909915043	0.940113331	0.937787112	0.955991944
15:15:48.384	0.934523816	0.942379928	0.896743939	0.898426496	0.893825612	0.893308014	0.896255315	0.896618347	0.896545602	0.897447945	0.893084412	0.894133898	0.895717857	0.896348301	0.910302197	0.940721871	0.938277736	0.956689972
15:15:49.248	0.93379265	0.938938303	0.89681113	0.898476691	0.893837188	0.8933207	0.896151959	0.896509429	0.896506538	0.897289333	0.892904631	0.894038418	0.895513676	0.896152586	0.910205582	0.940788109	0.938304531	0.956828866
15:15:50.976	0.934685118	0.941172206	0.896746774	0.898451443	0.893772025	0.893184035	0.895951803	0.896249496	0.896175809	0.896897849	0.892376801	0.893539115	0.895064156	0.895653611	0.909664324	0.940358608	0.937894782	0.956405686
15:15:51.840	0.93573954	0.943673218	0.896868832	0.898438058	0.893713113	0.89315686	0.895812979	0.896005406	0.8958012	0.896550388	0.891932034	0.893137761	0.894635123	0.895151727	0.909105011	0.939788898	0.937304937	0.955828667
15:15:52.704	0.934481408	0.947767385	0.896879409	0.898412007	0.893645235	0.893150485	0.895652304	0.895803481	0.895647687	0.896222617	0.891499168	0.89263212	0.894203112	0.894644942	0.908505138	0.939081475	0.936627463	0.955133078
15:15:53.568	0.934717266	0.940982332	0.896944613	0.898444456	0.893643213	0.893157834	0.895653939	0.895713293	0.895497808	0.896084678	0.891362241	0.8924418	0.893980496	0.894421477	0.908275718	0.938814676	0.936320251	0.954856747
15:15:54.432	0.935043569	0.936213241	0.897016019	0.898549086	0.893701569	0.893207994	0.895670789	0.895813508	0.895682664	0.89621551	0.891558335	0.892566441	0.894146309	0.894657665	0.908582344	0.939278251	0.936801831	0.95537535
15:15:55.296	0.93418126	0.938332764	0.896997798	0.898665301	0.893898517	0.893268643	0.895843213	0.895969108	0.895922926	0.896464062	0.891839121	0.892917717	0.894482186	0.895061002	0.909024425	0.939781952	0.937334947	0.955862948
15:15:56.160	0.932477219	0.939967284	0.897133699	0.8988076	0.894042044	0.893406837	0.896065716	0.896195703	0.89607434	0.896738394	0.892155361	0.89330008	0.894833897	0.89547743	0.909452489	0.940170711	0.937699588	0.95618746
15:15:57.024	0.936054131	0.942209528	0.89734004	0.898937184	0.894185612	0.893612672	0.896237837	0.896394118	0.896398958	0.896940702	0.892311335	0.893545617	0.895096885	0.895690125	0.909586389	0.940149502	0.937730903	0.956139832
15:15:58.752	0.932917889	0.944117338	0.897499086	0.899032496	0.894382823	0.893769783	0.896462933	0.89666989	0.896649042	0.89726153	0.892739573	0.894028933	0.895636892	0.89614746	0.910063381	0.940505504	0.938181939	0.95645875
15:15:59.616	0.935501712	0.946536637	0.897514271	0.899246112	0.894548518	0.894073698	0.89686506	0.897035277	0.89707964	0.897726081	0.893328505	0.894705725	0.896166127	0.896711133	0.910645434	0.940935596	0.938523115	0.956757784
15:16:00.480	0.934429864	0.939431469	0.897800721	0.899474974	0.89477691	0.894217529	0.897113419	0.897335999	0.897409706	0.898129646	0.893744819	0.89507172	0.896594259	0.897143781	0.911014505	0.941079411	0.938554692	0.95682232
15:17:15.648	0.937126876	0.935715516	0.902308361	0.903544879	0.897411825	0.897166172	0.896446691	0.895600366	0.894549409	0.894240079	0.888769835	0.889368789	0.890761268	0.891404354	0.905752371	0.938449009	0.936829023	0.955257361
15:17:16.512	0.939374419	0.943961526	0.902128784	0.903544599	0.897345936	0.896841717	0.896270983	0.895486816	0.89445778	0.893928374	0.888350522	0.888915223	0.890454386	0.890883529	0.905214435	0.937747401	0.935669523	0.954545695
15:17:18.240	0.941060918	0.946934285	0.90220516	0.903674958	0.89743589	0.896842955	0.896279203	0.895456093	0.894475239	0.893839293	0.888178758	0.888791816	0.890251026	0.890741424	0.905060928	0.937611722	0.935448146	0.954467286
15:17:19.104	0.939225414	0.945312557	0.902338819	0.903840151	0.89750385	0.896972417	0.896326853	0.895454847	0.894434348	0.893824645	0.888227241	0.888785179	0.890348231	0.890796107	0.905215517	0.938015859	0.935729952	0.954961043
15:17:19.968	0.937942348	0.947044595	0.902237011	0.90376936	0.897381976	0.896877336	0.896077297	0.89523117	0.894172332	0.893479064	0.887788368	0.88824146	0.889779513	0.890224767	0.904578083	0.93737445	0.935135402	0.954349427
15:17:20.832	0.940493632	0.943561148	0.902379695	0.903791663	0.897461647	0.896969426	0.896094569	0.895152996	0.894142673	0.893382156	0.887640531	0.888189367	0.889652892	0.890082921	0.904570403	0.937522619	0.935251795	0.954556921
15:17:21.696	0.938786662	0.943689628	0.902522251	0.903851689	0.897425474	0.896896061	0.896084403	0.895033022	0.8939757	0.893204868	0.887501423	0.887927286	0.88952119	0.889959532	0.904418006	0.937518805	0.93522076	0.954629962
15:17:22.560	0.941479153	0.946147502	0.902631575	0.903884062	0.897456475	0.896979915	0.895945302	0.894939313	0.893880528	0.893063455	0.887291101	0.887791422	0.889291785	0.889748339	0.904278539	0.937461723	0.935158635	0.954600729
15:17:23.424	0.939031897	0.945124287	0.902513227	0.903941555	0.8974452	0.897024438	0.895951589	0.894878478	0.893852192	0.892958764	0.887209674	0.88764656	0.889206666	0.889646059	0.904183959	0.937476065	0.93523514	0.954601656
15:17:24.288	0.938359348	0.945259067	0.90263881	0.903987705	0.897544339	0.897026254	0.895987277	0.89493813	0.893864096	0.893037204	0.887268234	0.887819441	0.889377577	0.889784867	0.904369207	0.937630799	0.935364443	0.954829102
15:17:26.016	0.938578348	0.940679713	0.902795654	0.904109484	0.897679112	0.897185012	0.896125562	0.895082826	0.89395921	0.893176813	0.887419414	0.887952552	0.88949778	0.889940375	0.904471707	0.937692664	0.935459226	0.954810468
15:17:26.880	0.939574689	0.941219176	0.902785622	0.904234222	0.897819214	0.897262833	0.896269262	0.89525691	0.894204602	0.893384113	0.887571603	0.888221632	0.889800657	0.890228099	0.904754251	0.937880466	0.935718876	0.954983505
15:17:27.744	0.940547327	0.948930925	0.902891671	0.904436843	0.897993041	0.897497104	0.896515129	0.895510686	0.894368036	0.893692994	0.8879651	0.888632927	0.890259956	0.890607557	0.905206901	0.938227208	0.935980444	0.955304052
15:17:28.608	0.939470397	0.945619159	0.903219895	0.904532169	0.898141898	0.897708143	0.896714443	0.895729566	0.894799602	0.893977081	0.888344694	0.888893575	0.890466574	0.890883678	0.905422172	0.938370866	0.936076039	0.955285721
15:17:29.472	0.939475089	0.942648994	0.903241243	0.904761774	0.898403693	0.897802685	0.896986274	0.896087847	0.895200307	0.894435449	0.888969647	0.889535673	0.891085099	0.891497626	0.906043324	0.9389928	0.936825348	0.955884009
15:17:30.336	0.938281334	0.940873381	0.903443052	0.904977738	0.898541473	0.897999652	0.897239933	0.896351664	0.89534688	0.894711908	0.889303462	0.889776141	0.89134537	0.891766217	0.906198998	0.938960631	0.936727479	0.955777492
15:17:31.200	0.941078625	0.94305887	0.903657109	0.905006628	0.898715356	0.898259631	0.897433066	0.896596284	0.895595309	0.895004678	0.889534963	0.890048543	0.891589978	0.89203856	0.906414697	0.939092926	0.936765692	0.955812367
15:17:32.064	0.940248137	0.945700368	0.903666343	0.905178678	0.898851448	0.898273253	0.89758623	0.896752626	0.895798268	0.895161641	0.889719724	0.890129475	0.891636235	0.892155003	0.906418984	0.938975296	0.936589232	0.955645745
15:17:33.792	0.940624848	0.945428214	0.903845151	0.905284354	0.898950254	0.898474462	0.89770426	0.896840724	0.895872841	0.895295928	0.889845338	0.890241423	0.891769901	0.892259681	0.906465926	0.938885838	0.936420833	0.955496535
15:17:34.656	0.940030413	0.946314848	0.903855376	0.90542446	0.899082969	0.898537892	0.897777198	0.896979191	0.895981436	0.895425917	0.889968156	0.890483492	0.891971701	0.892432036	0.906694571	0.939159609	0.936698762	0.955731794
15:17:35.520	0.937810007	0.9447	0.903998989	0.905452917	0.899119937	0.898577727	0.897913197	0.897016219	0.896063618	0.895486619	0.889936444	0.89046133	0.892002219	0.892465235	0.906723581	0.939137558	0.936623913	0.955779014
15:17:36.384	0.938374194	0.944472119	0.904146706	0.905524037	0.899202102	0.898778179	0.898018516	0.897092118	0.896102412	0.895547196	0.890009765	0.890550874	0.892058825	0.892598833	0.906924674	0.939495875	0.936880623	0.956073611
15:17:37.248	0.939192353	0.94241651	0.90410771	0.90559587	0.899211602	0.898758715	0.897921135	0.89696646	0.89600586	0.895388158	0.88979306	0.890338583	0.891802954	0.892310552	0.906630224	0.939189462	0.936639711	0.95576523
15:17:38.112	0.941859796	0.942413542	0.90409543	0.905627611	0.89919853	0.898750374	0.897843758	0.896881863	0.895907577	0.895241257	0.889623337	0.890197557	0.891686414	0.892150282	0.906488176	0.93914863	0.936687784	0.955743963
15:17:38.976	0.93992625	0.943741973	0.904142941	0.905615185	0.899171808	0.898675624	0.897683515	0.896692459	0.895708686	0.894967749	0.889332886	0.889867373	0.891322867	0.89180642	0.906136258	0.938773224	0.936436038	0.955411308
15:17:40.704	0.939846107	0.945402956	0.904126795	0.905641938	0.899160667	0.89866452	0.897671909	0.89661009	0.895575042	0.894831466	0.889197493	0.889649492	0.891206078	0.891676016	0.906041777	0.938843069	0.9365393	0.955581419
15:17:41.568	0.941478672	0.944943602	0.90412694	0.905673731	0.899108303	0.898589695	0.89757445	0.896456543	0.895377655	0.894615483	0.88891044	0.889415919	0.890913028	0.89139218	0.905788152	0.938560718	0.936314666	0.955361214
15:17:42.432	0.940313434	0.945506391	0.904230946	0.905683944	0.899144599	0.898614393	0.897469794	0.896409135	0.895281385	0.894497563	0.88873185	0.889279751	0.890742145	0.891231654	0.905640692	0.938561765	0.936347572	0.95535316
15:17:43.296	0.93984217	0.945198902	0.904162093	0.905723764	0.899128025	0.898664954	0.897428127	0.896289578	0.895187482	0.894352781	0.888593252	0.889069972	0.890569984	0.890978703	0.90541855	0.93837138	0.936224122	0.955188338
15:17:44.160	0.939433366	0.946127465	0.904232502	0.905799271	0.899183611	0.898611917	0.897325582	0.896226333	0.895132238	0.894251858	0.888472061	0.889012649	0.89042925	0.890906508	0.905368206	0.938438024	0.936303924	0.955255083
15:17:45.024	0.941227152	0.946191432	0.90445626	0.905777456	0.899196333	0.898682038	0.897337666	0.896221724	0.89505098	0.894234123	0.88843569	0.888992746	0.890470542	0.890901455	0.905399431	0.938519364	0.936430985	0.955403118
15:17:45.888	0.939462385	0.946423646	0.904493598	0.905846283	0.899232744	0.898696592	0.897315972	0.896211901	0.895110179	0.894181447	0.888430116	0.888923407	0.890400606	0.890883969	0.905449559	0.938550357	0.936512796	0.955502988
15:17:46.752	0.940557457	0.945124296	0.904553084	0.905928144	0.89923718	0.898758121	0.897346726	0.896164006	0.895130295	0.894150082	0.888358471	0.888772279	0.890335104	0.8908266	0.905386179	0.9385677	0.936584751	0.955491468
15:17:48.480	0.940175671	0.945359029	0.904467488	0.90594009	0.899255766	0.898811179	0.897318729	0.896092324	0.894913992	0.894003351	0.888155746	0.888662435	0.89012942	0.890639705	0.905213344	0.938408223	0.93640874	0.955398682
15:17:49.344	0.939852097	0.945071492	0.904572599	0.905994659	0.899204312	0.898797023	0.897205874	0.895988793	0.894876457	0.893885642	0.888003213	0.888445602	0.889922351	0.890384485	0.904935738	0.938162505	0.936119079	0.955058508
15:17:50.208	0.941660136	0.946983018	0.904546038	0.906024906	0.89923793	0.898712559	0.897164491	0.895924689	0.894776161	0.893750892	0.88785548	0.888235738	0.889742108	0.890208499	0.90471725	0.937899029	0.935810493	0.954813782
15:17:51.072	0.940235396	0.945779669	0.904611874	0.906132	0.899251167	0.8987987	0.897172589	0.895879891	0.894656232	0.893649028	0.8876725	0.888007252	0.889501586	0.889989985	0.904387283	0.937486814	0.935348965	0.95433241
15:17:51.936	0.941553567	0.945662122	0.90476157	0.906207726	0.899329383	0.898915637	0.897209906	0.895971757	0.894717425	0.893774769	0.887818085	0.88811936	0.88963037	0.890144511	0.904570808	0.937662527	0.935566288	0.954603333
15:17:52.800	0.942062926	0.946707428	0.904828638	0.906344236	0.899439879	0.898980746	0.897352658	0.896089329	0.894868473	0.893925036	0.888094416	0.888398474	0.889870333	0.890410955	0.904916618	0.938090193	0.93605983	0.955034227
15:17:53.664	0.940636153	0.947847922	0.904893096	0.906433136	0.89951629	0.899028442	0.897385992	0.89612351	0.89488309	0.89394318	0.888064008	0.888471669	0.889894408	0.890402986	0.904878726	0.938023883	0.935998911	0.954947078
15:17:54.528	0.942024533	0.942662984	0.905032976	0.906465828	0.899623787	0.899131459	0.897431908	0.896208782	0.894999369	0.89402725	0.88813619	0.888559088	0.89004215	0.890523274	0.905071268	0.93826876	0.936315176	0.955224507
15:17:56.256	0.942444248	0.94899149	0.905044877	0.906542029	0.899704838	0.89920347	0.897532	0.896273836	0.89502629	0.894129399	0.888236689	0.888781172	0.890271608	0.890612819	0.90540067	0.93876056	0.936735868	0.955739976
15:17:57.120	0.940960285	0.945180812	0.905142983	0.906480304	0.899621426	0.899155528	0.897341516	0.896055201	0.894900241	0.893802162	0.887870199	0.888232823	0.889698586	0.889875222	0.904754652	0.938040472	0.936061694	0.955019747
15:17:57.984	0.941833787	0.948300498	0.90502896	0.906436886	0.899585204	0.899086035	0.897150991	0.89584196	0.894622574	0.893554413	0.887528933	0.887944155	0.88934073	0.889511979	0.904424951	0.93779074	0.935782165	0.954817665
15:17:58.848	0.94261303	0.944712333	0.90500173	0.906435178	0.899544189	0.899018868	0.897033245	0.895713797	0.894441694	0.893314639	0.887313193	0.887643222	0.889121084	0.889238075	0.904189884	0.937661995	0.935602556	0.954707371
15:17:59.712	0.942922214	0.949127582	0.905142035	0.906443519	0.899544917	0.899028007	0.896948569	0.895591352	0.894243813	0.893152855	0.887104714	0.887490438	0.888885684	0.889049886	0.904045832	0.937644161	0.935606938	0.954744998
15:19:15.744	0.940964487	0.966219814	0.90881046	0.91039707	0.901910591	0.901407947	0.896401669	0.894216884	0.89198094	0.890193426	0.88348023	0.883762884	0.885331921	0.885710674	0.901199748	0.936777978	0.934072802	0.954342463
15:19:16.608	0.945509054	0.945413082	0.909326403	0.910343776	0.901868354	0.901399245	0.896187852	0.893850611	0.891721337	0.889667735	0.882700341	0.882970692	0.884364751	0.884591948	0.900235157	0.935619737	0.932774263	0.953279339
15:19:17.472	0.945376668	0.948331516	0.90946425	0.910364092	0.901792682	0.901377765	0.895918619	0.893465574	0.891411149	0.889169498	0.882098193	0.882428032	0.88384093	0.883971386	0.899841867	0.935567994	0.932851729	0.953476718
15:19:18.336	0.945927134	0.94529836	0.909357872	0.91029937	0.901630996	0.901137252	0.895489053	0.892943732	0.890673997	0.888404362	0.881218657	0.881556126	0.882831229	0.883058587	0.898889879	0.93483966	0.932041663	0.952827585
15:19:19.200	0.94583132	0.947835736	0.9091902	0.910240592	0.901395424	0.900916881	0.895106923	0.892452181	0.890262093	0.887783194	0.880417191	0.88074834	0.882070511	0.882308883	0.898254172	0.93464167	0.932024717	0.952795709
15:19:20.064	0.944245728	0.949291918	0.909218451	0.910093006	0.901192361	0.900701256	0.894599286	0.891935321	0.889546446	0.887031885	0.879649402	0.879829888	0.881186566	0.881241881	0.897452647	0.934178788	0.931477463	0.952518742
15:19:21.792	0.94428019	0.951879185	0.909052523	0.909875621	0.900900269	0.90047226	0.894101699	0.89134343	0.888929459	0.886167308	0.878658986	0.878803724	0.880107483	0.880346313	0.896324017	0.933223305	0.930549496	0.951716262
15:19:22.656	0.946019567	0.947750393	0.908872721	0.909766795	0.900675456	0.900119297	0.8936818	0.890786176	0.888311848	0.885461537	0.877760076	0.877801167	0.879264345	0.879441792	0.895453109	0.932559887	0.929991626	0.951281546
15:19:23.520	0.945323222	0.945744765	0.909010486	0.909676466	0.90044178	0.899999921	0.893338547	0.890317297	0.887738913	0.884828629	0.877066699	0.877107006	0.878430782	0.878680204	0.894732603	0.932051031	0.929597614	0.950867601
15:19:24.384	0.945026481	0.946412491	0.908863435	0.909605844	0.900348778	0.899923004	0.892985961	0.889928768	0.887263295	0.884291275	0.876484468	0.87640539	0.877715541	0.877912742	0.894037461	0.931423494	0.929018698	0.950413112
15:19:25.248	0.943393074	0.950191188	0.908826496	0.909602749	0.900294577	0.899946294	0.892829737	0.889713882	0.887105469	0.884009124	0.876106485	0.87608659	0.877380082	0.877574604	0.893793452	0.931404863	0.928974026	0.950462776
15:19:26.112	0.945693065	0.947185153	0.908759559	0.909577675	0.900185248	0.899757265	0.892581029	0.889477275	0.886743604	0.883608296	0.875661466	0.875516203	0.876807263	0.876987532	0.893085059	0.930694798	0.928250796	0.94972155
15:19:26.976	0.944166458	0.947932212	0.908863785	0.90959827	0.900233179	0.899740619	0.89257497	0.889361398	0.886646524	0.883473967	0.875504695	0.875331181	0.876647247	0.876850087	0.892953544	0.930609877	0.928155129	0.949667383
15:19:27.840	0.94402672	0.947618167	0.908863817	0.909647477	0.900239547	0.899754588	0.892550121	0.889317282	0.886623951	0.88339296	0.875455479	0.875282087	0.876580328	0.876779925	0.892915576	0.930597952	0.928115306	0.949677216
15:19:29.568	0.944824275	0.950155155	0.909026009	0.909738637	0.900280327	0.899777355	0.892496213	0.889338421	0.886612001	0.883388081	0.875460869	0.875261162	0.876608139	0.876775539	0.892976552	0.930710444	0.928146996	0.949794118
15:19:30.432	0.946203505	0.949225885	0.90901313	0.909716215	0.900290944	0.899876888	0.892510355	0.889242494	0.886464748	0.883286917	0.875325268	0.875157931	0.876471766	0.876619638	0.892828121	0.930527517	0.927878976	0.949617519
15:19:31.296	0.94476052	0.948716902	0.909128089	0.90983549	0.900352079	0.899956031	0.892595406	0.889367913	0.886645376	0.883363786	0.875398202	0.875282097	0.876673542	0.876879235	0.893036399	0.930809868	0.928037852	0.94986318
15:19:32.160	0.945197791	0.949262022	0.909114083	0.909967479	0.900452156	0.89995851	0.892679328	0.889462854	0.886597748	0.883475304	0.875519514	0.875392994	0.87679019	0.877063319	0.893098663	0.930807258	0.928043301	0.949839348
15:19:33.024	0.943740444	0.951106523	0.909189526	0.910082639	0.900657608	0.900215713	0.892917723	0.889697114	0.886912606	0.883795387	0.875848127	0.875796105	0.877265664	0.87747891	0.893608524	0.931344887	0.928681048	0.950279433
15:19:33.888	0.945109304	0.948621416	0.909500075	0.910327555	0.900780493	0.900394977	0.893177471	0.889952413	0.887203465	0.884126205	0.876240154	0.876213825	0.877607178	0.877906822	0.893972616	0.931565788	0.928982365	0.950430345
15:19:34.752	0.945696657	0.9514681	0.909638906	0.910412068	0.900984297	0.900494211	0.893409088	0.890238002	0.887462224	0.884483075	0.876675502	0.876617339	0.877864805	0.878179722	0.894259964	0.931642785	0.928940095	0.950366873
15:19:36.480	0.943560432	0.944467753	0.909812061	0.910563587	0.901235913	0.900845712	0.893819285	0.890690834	0.888044813	0.885033047	0.877218696	0.877254421	0.878572916	0.878820643	0.894861079	0.932033944	0.929252568	0.950614091
15:19:37.344	0.945154078	0.94466412	0.910114297	0.910868735	0.901573956	0.901178105	0.894287052	0.891232969	0.888618928	0.885710678	0.877954659	0.8781222	0.879423379	0.879580261	0.895622616	0.932511365	0.9296319	0.95094586
15:19:38.208	0.946968326	0.947323036	0.910188108	0.911158984	0.901915006	0.90149452	0.894834536	0.891829428	0.889299509	0.886434068	0.878803464	0.878882618	0.88024896	0.880554042	0.896301158	0.932806035	0.929701755	0.951029818
15:19:39.072	0.946045647	0.947199673	0.910491089	0.91147981	0.902352683	0.901960836	0.895488664	0.892603358	0.890145042	0.887413381	0.87996955	0.880013879	0.881527925	0.881704516	0.897474865	0.933617885	0.930442363	0.951689954
15:19:39.936	0.94515734	0.953846695	0.910768729	0.911741743	0.902797023	0.90236634	0.896143019	0.893360921	0.890912558	0.888399451	0.880989694	0.881295281	0.882669927	0.882823535	0.898504185	0.934215724	0.930889401	0.952077025
15:19:40.800	0.947168489	0.952847211	0.911149842	0.912088974	0.903254015	0.902873691	0.896898035	0.894201373	0.891879813	0.889515969	0.882263123	0.882615885	0.884012154	0.884244558	0.899815024	0.935232173	0.931784215	0.952938802
15:19:41.664	0.945594249	0.949961129	0.911403891	0.912347969	0.903638849	0.903196432	0.897495649	0.894848145	0.892655531	0.890359831	0.883329261	0.88363534	0.885007373	0.885339506	0.900684187	0.935705907	0.932079878	0.953207862
15:19:42.528	0.946093122	0.949480236	0.91162606	0.912739014	0.903975894	0.903591887	0.898044241	0.895441497	0.893253912	0.891116149	0.884241047	0.884435944	0.885909452	0.886186438	0.901492169	0.9361576	0.932404022	0.953552265
15:19:44.256	0.945752653	0.949871307	0.911849738	0.913003367	0.904337601	0.903897669	0.898552495	0.896052345	0.893938758	0.891866172	0.885031526	0.885330562	0.886799456	0.887266163	0.902418221	0.936869607	0.933014833	0.95415393
15:19:45.120	0.947101438	0.951741484	0.912124949	0.913170681	0.904630538	0.904149288	0.898978367	0.896604284	0.894470121	0.892524899	0.885856238	0.886231209	0.887696802	0.88800108	0.903238707	0.93751554	0.933586964	0.95467564
15:19:45.984	0.947622127	0.95313117	0.912332854	0.913453214	0.904950557	0.904487223	0.899463569	0.89710906	0.894995553	0.893198576	0.886549481	0.887017543	0.888615987	0.888709172	0.904159809	0.938334314	0.934400031	0.955429473
15:19:46.848	0.947364092	0.952669974	0.912376177	0.913624686	0.905164777	0.904778322	0.899818115	0.897484013	0.895502554	0.893660501	0.887194896	0.887611712	0.889191805	0.889402887	0.904793097	0.938917816	0.93494089	0.955909745
15:19:47.712	0.947866914	0.948307423	0.912653386	0.913814335	0.905360755	0.905036785	0.900133217	0.897836442	0.895884404	0.894130064	0.887816243	0.888259587	0.889828982	0.889949742	0.905401218	0.939522037	0.935336351	0.956373838
15:19:48.576	0.948796969	0.951412802	0.91277223	0.913876951	0.905538925	0.905179064	0.900352495	0.898103042	0.896199061	0.894504422	0.888278141	0.888615535	0.890165232	0.89042927	0.90573912	0.939640677	0.935461098	0.95644512
15:19:49.440	0.948477113	0.951678245	0.912830372	0.914077853	0.905677982	0.905356997	0.900635894	0.898329205	0.896383679	0.894769903	0.888581131	0.888993274	0.890465396	0.890841482	0.906016375	0.939716011	0.935650021	0.95641381
15:19:50.304	0.947873709	0.953455846	0.913052383	0.914240602	0.905909753	0.905556564	0.90085866	0.898674628	0.896715355	0.895214136	0.889097082	0.889487996	0.891137538	0.891489181	0.906669029	0.940189952	0.936157073	0.956959175
15:19:52.032	0.948856974	0.954140615	0.913067265	0.91437781	0.906064588	0.905704168	0.901134255	0.898976826	0.89705457	0.89556462	0.8893963	0.889892823	0.891490209	0.89181349	0.906986915	0.940403823	0.936333291	0.957056939
15:19:52.896	0.948819669	0.953423142	0.913320869	0.914559053	0.906300823	0.905935136	0.901489378	0.899350586	0.897452627	0.896047318	0.890012121	0.890576229	0.892111761	0.89241947	0.907636602	0.940932131	0.93672246	0.957413556
15:19:53.760	0.948713505	0.950801533	0.91343606	0.914752472	0.906514169	0.906194447	0.901799013	0.899723068	0.898036924	0.896506999	0.890470528	0.891079484	0.892732454	0.89282581	0.908097583	0.941083897	0.936797441	0.957478966
15:19:54.624	0.948065375	0.949326013	0.913666272	0.914966442	0.906766065	0.906455178	0.902252562	0.900231422	0.898418751	0.897187651	0.891218266	0.891864101	0.893535802	0.893614202	0.90886762	0.941697945	0.937341248	0.958109256
15:19:55.488	0.950697369	0.954192481	0.913883864	0.915103206	0.90710543	0.906745684	0.902675955	0.900714094	0.899079027	0.897821532	0.891879074	0.892569544	0.89422754	0.894504847	0.909620431	0.942173388	0.937669811	0.958400647
15:19:56.352	0.949687817	0.951931668	0.914176279	0.915427338	0.907436392	0.90699351	0.903158145	0.90120271	0.899705542	0.898448413	0.892713802	0.893401278	0.89495876	0.895155093	0.910211273	0.942435379	0.937895031	0.958579883
15:19:57.216	0.949205534	0.95343192	0.914273599	0.915646884	0.907757655	0.907265926	0.903630592	0.901773042	0.900266574	0.899191479	0.893494096	0.894263139	0.895823764	0.896077553	0.911027266	0.942989277	0.938451718	0.95893033
15:19:58.944	0.950762745	0.954882856	0.914527836	0.915855171	0.90801252	0.907661398	0.90407234	0.902277788	0.900866933	0.899785785	0.894153295	0.894917378	0.896512072	0.896885429	0.911566148	0.943222773	0.938713445	0.959024969
15:19:59.808	0.947683911	0.95303125	0.914676268	0.916126216	0.908354508	0.907964913	0.904606426	0.902847347	0.901396437	0.900546436	0.894953895	0.89600593	0.897406404	0.897847915	0.912547196	0.943951737	0.939355477	0.959687898
15:21:14.976	0.960681681	0.974945494	0.927400856	0.928962729	0.924405241	0.924068315	0.927024711	0.928404321	0.92860549	0.932419676	0.930112933	0.932827987	0.933935397	0.93449784	0.946208979	0.966325715	0.958413443	0.97619503
15:21:15.840	0.959383832	0.961669347	0.927367012	0.929332287	0.924665711	0.924381657	0.92722506	0.928613793	0.929244833	0.932709747	0.93070909	0.933131594	0.934467631	0.935043599	0.946646646	0.966857472	0.958687873	0.976520798
15:21:16.704	0.959522333	0.960994998	0.927760822	0.929612425	0.924905085	0.92463149	0.927502043	0.928871969	0.929476998	0.932904773	0.930894328	0.933267367	0.934618796	0.935164271	0.946650281	0.966616133	0.958452025	0.976217171
15:21:18.432	0.961066568	0.963373249	0.927712417	0.929745818	0.925032634	0.924699604	0.927618282	0.928950481	0.929488489	0.933017356	0.931001149	0.933266364	0.934673944	0.935227441	0.946682736	0.966681674	0.958488947	0.976226111
15:21:19.296	0.960134077	0.963161382	0.927880466	0.929828562	0.925143743	0.92481701	0.92775246	0.92909251	0.929574518	0.933139084	0.931125158	0.933442124	0.934847474	0.93540813	0.946850056	0.966837647	0.95860721	0.976360147
15:21:20.160	0.960704747	0.963354574	0.927899555	0.92992188	0.925263965	0.924970731	0.927846194	0.929217864	0.929810553	0.933270615	0.931186695	0.93352195	0.93497543	0.935492408	0.946883217	0.966801423	0.958598685	0.976290859
15:21:21.024	0.960237856	0.959889779	0.928136618	0.930110461	0.925455369	0.925109433	0.928105376	0.929473835	0.930070132	0.933599207	0.931642364	0.933960171	0.935283536	0.936052422	0.947359417	0.967281907	0.958987799	0.976759415
15:21:21.888	0.961683016	0.962015825	0.928277922	0.930271698	0.925622344	0.925276142	0.928335702	0.929658753	0.930394662	0.933805522	0.93189358	0.934266401	0.935520737	0.936303595	0.947607172	0.967528559	0.959215015	0.976923062
15:21:22.752	0.962551786	0.964230703	0.928435015	0.930356276	0.925759792	0.925466186	0.92849905	0.929900538	0.930692677	0.934081687	0.932242531	0.934567275	0.935863262	0.936644979	0.947880853	0.967686171	0.95930617	0.977077252
15:21:23.616	0.961309276	0.964356119	0.928684282	0.930546094	0.925911389	0.925604488	0.928724968	0.930156334	0.931013583	0.934341362	0.932556274	0.934848867	0.936163461	0.936857203	0.948139972	0.967823228	0.959412682	0.977205873
15:21:24.480	0.962373355	0.963398363	0.928689954	0.930704159	0.926139378	0.925835313	0.929025221	0.930451544	0.93132453	0.934764428	0.93303663	0.935433385	0.93681427	0.937365053	0.94873709	0.968411049	0.959823699	0.977763276
15:21:26.208	0.960796025	0.965065648	0.92883246	0.930737196	0.926306776	0.925990258	0.929200458	0.930672471	0.931559122	0.93499162	0.933218145	0.935632864	0.936976927	0.937446609	0.948889854	0.968397927	0.959642576	0.977675602
15:21:27.072	0.960631116	0.964403962	0.929026226	0.930924196	0.926477369	0.926175078	0.929501489	0.930966581	0.931861407	0.935343739	0.933557909	0.936004542	0.937404979	0.937922681	0.949249828	0.968662918	0.959735239	0.977828142
15:21:27.936	0.960643308	0.966088531	0.929107956	0.931026642	0.926579714	0.926202746	0.929617183	0.931070028	0.931946573	0.935462983	0.933656218	0.935993338	0.937435122	0.937804157	0.949152249	0.968374972	0.959572481	0.977507575
15:21:28.800	0.961013668	0.965190096	0.929167511	0.931176824	0.926774438	0.926320256	0.929791936	0.931275357	0.932084114	0.935654198	0.933824922	0.936183447	0.9375732	0.938164533	0.949212324	0.968266811	0.959385208	0.977322163
15:21:29.664	0.961423791	0.962511123	0.929404916	0.931384838	0.926934652	0.926587888	0.930080019	0.931579818	0.932482382	0.936026763	0.934199935	0.936698455	0.938062608	0.938613093	0.949669083	0.968762581	0.95984586	0.977783996
15:21:30.528	0.961582912	0.963892548	0.929614158	0.931511807	0.927163117	0.926857254	0.930347529	0.931816427	0.932839045	0.93635704	0.934565729	0.9370642	0.938524525	0.938982169	0.950044749	0.969014007	0.96018807	0.978049512
15:21:31.392	0.962073885	0.965420046	0.929644721	0.931714344	0.927261351	0.926994421	0.930560957	0.932041858	0.933045524	0.936589757	0.934945422	0.93737717	0.938850525	0.939354554	0.95039079	0.969375024	0.960555577	0.978475262
15:21:33.120	0.961489601	0.964310408	0.929770644	0.931726655	0.92737671	0.927103086	0.930591003	0.932142553	0.933153889	0.936644211	0.93494486	0.937378601	0.938810747	0.939361139	0.950302796	0.969196271	0.960330059	0.978244494
15:21:33.984	0.960686286	0.962009083	0.929804014	0.931765608	0.927436897	0.927225258	0.930716751	0.932154024	0.933139043	0.936691923	0.934946886	0.937373957	0.938828165	0.939371494	0.950252044	0.969028151	0.960091133	0.978029314
15:21:34.848	0.961910826	0.964604118	0.929962601	0.931889164	0.927539015	0.927205561	0.930886448	0.932349829	0.933271639	0.93689284	0.935255985	0.937643648	0.939129962	0.939740558	0.950609814	0.969431516	0.960450053	0.978475458
15:21:35.712	0.962036908	0.963307986	0.930079634	0.931997039	0.927603505	0.927318538	0.930938105	0.932366373	0.933244717	0.936920356	0.935220067	0.93755891	0.939064141	0.939556816	0.95044979	0.969182586	0.960057122	0.978174905
15:21:36.576	0.961663906	0.960793223	0.930223094	0.932150891	0.927753951	0.927513067	0.931153297	0.932629556	0.933442899	0.937215414	0.935677275	0.938030921	0.939502759	0.940001433	0.95102437	0.969859661	0.960623292	0.978774287
15:21:37.440	0.96143646	0.960882071	0.930232703	0.932223984	0.927864102	0.927626894	0.931243793	0.932739122	0.933518298	0.937331667	0.935820261	0.938153857	0.939572144	0.940154557	0.951111345	0.969917587	0.960665504	0.978793452
15:21:38.304	0.96125682	0.963479739	0.930503337	0.932357442	0.927984179	0.927715297	0.931468984	0.932898466	0.933718881	0.937500213	0.936026499	0.938349573	0.93972896	0.940392597	0.95135414	0.970128064	0.960909928	0.978970759
15:21:39.168	0.962318362	0.96553141	0.930626225	0.932416363	0.928121198	0.927887228	0.931490875	0.933005802	0.933862365	0.937619255	0.936169238	0.938517554	0.939895404	0.94048505	0.951527981	0.970221637	0.961090253	0.979045596
15:21:40.896	0.961759363	0.965958501	0.930477601	0.93252683	0.928199244	0.927849871	0.931548765	0.933090412	0.933945714	0.937701139	0.936258249	0.93853086	0.939948395	0.940628508	0.951499949	0.970133229	0.960908652	0.978918322
15:21:41.760	0.961767487	0.966924414	0.930746521	0.932672383	0.928391359	0.928103295	0.931929741	0.933344652	0.934414536	0.938047581	0.936612866	0.939055221	0.940405754	0.940934045	0.952034485	0.970640262	0.961494757	0.979515067
15:21:42.624	0.962750935	0.95936682	0.93080594	0.932785893	0.928528106	0.928199829	0.932025134	0.933484495	0.934390863	0.938144637	0.936688276	0.939075208	0.9405062	0.940982063	0.95204642	0.97051976	0.961249979	0.979367291
15:21:43.488	0.961664712	0.962260181	0.930944683	0.932891942	0.928632985	0.928350343	0.932074619	0.933544624	0.93461689	0.938202047	0.936705542	0.939134274	0.940525625	0.940944952	0.951969145	0.970315545	0.960972931	0.979120105
15:21:44.352	0.962108514	0.966549232	0.931094382	0.9330079	0.928731515	0.928419603	0.932178099	0.933668104	0.934769092	0.938327836	0.936732516	0.939206862	0.940616794	0.940976221	0.951936384	0.970206912	0.960832721	0.978892383
15:21:45.216	0.961982507	0.969816307	0.931190057	0.933176487	0.928898056	0.928598913	0.932457971	0.933957469	0.93507124	0.938623244	0.937130353	0.939497997	0.940941506	0.941413186	0.952256228	0.970478855	0.960972514	0.979131358
15:21:46.080	0.963509541	0.966468219	0.931326936	0.933307826	0.929119079	0.928834624	0.932677851	0.934154208	0.935173983	0.938883143	0.937383391	0.939709352	0.941137987	0.941630044	0.952381548	0.970512688	0.960870543	0.979117714
15:21:46.944	0.962846996	0.964104481	0.931547879	0.933378053	0.929215773	0.92899313	0.932775254	0.934271388	0.935308848	0.938940106	0.937363322	0.939686519	0.941012841	0.941410384	0.952155258	0.970020036	0.960428359	0.978551484
15:21:48.672	0.963595425	0.966803628	0.931685058	0.933701893	0.929532303	0.92927278	0.933297908	0.934783125	0.935698834	0.93958544	0.938155177	0.940467658	0.941847788	0.942454656	0.953029265	0.970914269	0.961276906	0.979394946
15:21:49.536	0.964196854	0.96745347	0.931913371	0.933847366	0.929781538	0.929440693	0.933578999	0.935139412	0.936089958	0.94000322	0.93864604	0.940963003	0.942437407	0.942901859	0.953504123	0.971253597	0.961540276	0.979691117
15:21:50.400	0.963949991	0.969785417	0.931958593	0.933988514	0.930015605	0.929595514	0.933861811	0.935403437	0.936427534	0.940361611	0.939080762	0.941321544	0.942814632	0.943226483	0.953842393	0.971431986	0.961678129	0.979826222
15:21:51.264	0.96358873	0.968127662	0.932104601	0.934162255	0.930120488	0.929801605	0.93401746	0.935620699	0.936580878	0.94056184	0.939265844	0.9415261	0.943061547	0.943467818	0.953925158	0.971475504	0.961635227	0.979787957
15:21:52.128	0.964493483	0.963923897	0.93219895	0.934331393	0.930284178	0.929945794	0.934241362	0.935849735	0.93682744	0.940820164	0.939601911	0.94179474	0.943354345	0.943735135	0.954112915	0.971600224	0.961726295	0.979857626
15:21:52.992	0.965237244	0.968462527	0.93235212	0.934344002	0.930341432	0.93009573	0.934298193	0.935934074	0.93692485	0.940886739	0.939678512	0.941786575	0.943333023	0.943831866	0.954095266	0.971479515	0.961530845	0.979677293
15:21:53.856	0.963561854	0.967020214	0.932446259	0.934427312	0.930446696	0.930158188	0.934435043	0.936010277	0.937116633	0.940972195	0.939750686	0.941943004	0.94339971	0.94391622	0.95419592	0.971512186	0.961463267	0.979727088
15:21:55.584	0.965025635	0.968007173	0.932386771	0.934501675	0.930497034	0.930185232	0.934452618	0.93606371	0.937122413	0.941046678	0.93982156	0.942044854	0.943449374	0.944056152	0.954361278	0.971781634	0.961569699	0.979943156
15:21:56.448	0.963819475	0.968998899	0.932528219	0.934532412	0.930529922	0.9302523	0.934497769	0.936042702	0.937089345	0.941000242	0.939805245	0.942060165	0.943416689	0.944089058	0.954411581	0.971946962	0.961846421	0.980144576
15:21:57.312	0.962517778	0.96582938	0.932499351	0.934529602	0.930430208	0.930105386	0.934244406	0.935774055	0.936818111	0.940611786	0.939313102	0.941514733	0.942958426	0.943504857	0.953839164	0.971334174	0.961312622	0.979597406
15:21:58.176	0.96399243	0.967455933	0.932502545	0.934488906	0.9303549	0.93005387	0.93410978	0.935599894	0.936476914	0.940400744	0.939107811	0.941283423	0.94274831	0.943333217	0.953696924	0.971379577	0.9613762	0.97965359
15:21:59.040	0.9638358	0.970356747	0.932463428	0.934447002	0.930233515	0.929910342	0.933864344	0.935355727	0.936283897	0.94002235	0.938688052	0.940890427	0.942367978	0.942854675	0.953282073	0.971030355	0.961164791	0.979450753
15:21:59.904	0.964398092	0.966393568	0.932394754	0.934411367	0.930170186	0.929849513	0.93370345	0.935073444	0.935978642	0.939666909	0.938276107	0.940420276	0.941886285	0.942311353	0.952852837	0.970701011	0.960857303	0.979123797
15:23:15.936	0.967718346	0.964675048	0.93997606	0.941546484	0.937896785	0.937739931	0.942514361	0.944124471	0.944944002	0.949774187	0.948886175	0.951213099	0.952510931	0.953303048	0.962237112	0.977068788	0.966740301	0.983809881
15:23:16.800	0.970303452	0.973147677	0.939782786	0.94185467	0.938351042	0.938117071	0.943107305	0.944924137	0.946066104	0.950398264	0.949854107	0.952146816	0.953563723	0.954070914	0.963191248	0.977604918	0.967501435	0.984316475
15:23:17.664	0.969411437	0.973418565	0.940339882	0.94245334	0.939116502	0.938827419	0.944219808	0.94616541	0.947527979	0.950224452	0.951620351	0.953850741	0.95519154	0.955733209	0.964856679	0.978790229	0.968662985	0.985371327
15:23:18.528	0.969819462	0.972893218	0.940673688	0.942789799	0.939629124	0.939335568	0.945028776	0.947044343	0.948393472	0.951208085	0.952781869	0.955159072	0.956561333	0.957146647	0.96609014	0.9798181	0.969619667	0.986265893
15:23:19.392	0.971550975	0.977017827	0.940904161	0.943175486	0.940028788	0.939765643	0.945669514	0.947782204	0.949296116	0.951877882	0.953593046	0.956112042	0.95743144	0.958117744	0.966861436	0.980297671	0.970004969	0.9865962
15:23:21.120	0.971234793	0.972878841	0.941212575	0.943455882	0.940423079	0.94024226	0.946221804	0.948423125	0.950098993	0.952308044	0.954424513	0.956901458	0.958263084	0.958859353	0.967537791	0.980672208	0.970296624	0.986776276
15:23:21.984	0.970414861	0.976070745	0.941455967	0.943717397	0.940837106	0.940569402	0.946803386	0.949083969	0.950752256	0.953031831	0.955316317	0.957831505	0.959232071	0.959739559	0.968298138	0.981072452	0.970550837	0.987036618
15:23:22.848	0.971504565	0.97366054	0.941873694	0.944040318	0.941153339	0.940965566	0.947424687	0.949647874	0.951304027	0.953895271	0.956086419	0.95862251	0.960016293	0.960421335	0.9688125	0.981358662	0.970838589	0.987167693
15:23:23.712	0.971546065	0.972273344	0.94198595	0.944289742	0.94150699	0.941233158	0.947802485	0.950208792	0.951864992	0.954785427	0.956859973	0.959293983	0.960566533	0.961162728	0.969343024	0.981546001	0.970997077	0.987215398
15:23:24.576	0.971667013	0.976597703	0.942257849	0.944572653	0.941866442	0.941633736	0.948380065	0.950832603	0.952554315	0.955424293	0.957752808	0.960116281	0.961398258	0.962043263	0.970117643	0.982160937	0.971438174	0.987615116
15:23:25.440	0.971940907	0.974973828	0.942495833	0.944836263	0.942182818	0.941949907	0.948897437	0.951403678	0.953205315	0.95633822	0.958398826	0.960932059	0.962205889	0.962837343	0.970818913	0.982597721	0.971844462	0.987973518
15:23:26.304	0.970258181	0.973204309	0.942757921	0.945116494	0.942546618	0.942285516	0.94937125	0.951959363	0.953686453	0.957011773	0.958977826	0.961637221	0.962980438	0.963546219	0.971490773	0.982969063	0.972037334	0.98822194
15:23:27.168	0.971183919	0.976504586	0.943016271	0.945304098	0.942787107	0.942523889	0.949731324	0.952347081	0.954086023	0.957547673	0.959473154	0.962128132	0.963387451	0.964045672	0.971890315	0.98309469	0.972095065	0.988283158
15:23:28.896	0.971662645	0.976160452	0.943071475	0.945410242	0.943010401	0.942668488	0.949995296	0.952631672	0.954257818	0.957868616	0.9598063	0.962429922	0.963617609	0.964245375	0.972027005	0.983032605	0.971870689	0.988101843
15:23:29.760	0.972554966	0.97474683	0.943340234	0.945646798	0.943261816	0.942981482	0.950402367	0.953131119	0.954865304	0.958600756	0.960607711	0.963188691	0.964511471	0.965082126	0.972865923	0.983856223	0.972779091	0.988907332
15:23:30.624	0.971486061	0.974415166	0.943405494	0.945826575	0.943498465	0.943226193	0.950647088	0.953416002	0.955104141	0.959030814	0.960976072	0.963600938	0.964950529	0.965590939	0.973245941	0.984259165	0.973000258	0.989302619
15:23:31.488	0.973589914	0.976729684	0.943602415	0.945898697	0.943629756	0.94336378	0.950853672	0.953606682	0.955330559	0.959254837	0.961312917	0.963973148	0.965332139	0.96582721	0.973597482	0.984629897	0.973385998	0.989771426
15:23:32.352	0.972202336	0.978294215	0.94363346	0.945904163	0.943550706	0.943300972	0.950727171	0.953422063	0.955195118	0.958973164	0.960965206	0.963518316	0.964817592	0.965505265	0.973053777	0.984048201	0.972833235	0.989080256
15:23:33.216	0.973073997	0.976768942	0.943521977	0.945865568	0.943499874	0.943173537	0.950510307	0.953174505	0.954806674	0.958575482	0.960452254	0.963026035	0.964300453	0.964896162	0.972539108	0.983598636	0.972434525	0.988666236
15:23:34.080	0.972801134	0.973472852	0.943435113	0.945823668	0.943264279	0.943021105	0.950112798	0.952711258	0.954272354	0.957910126	0.959757287	0.962239992	0.963464079	0.964185864	0.971805067	0.982864346	0.971759044	0.987940374
15:23:34.944	0.972686173	0.976238626	0.943358788	0.945696391	0.943162872	0.94289198	0.949868381	0.952387147	0.953985456	0.957477781	0.959319819	0.961839327	0.963076975	0.963704077	0.971628083	0.983028544	0.971943412	0.988237808
15:23:36.672	0.972734358	0.979435152	0.94338831	0.945564168	0.942865646	0.942532189	0.949331112	0.95173322	0.953248887	0.956594773	0.958371621	0.960884378	0.962116261	0.962825841	0.970738145	0.982401777	0.971342542	0.987698014
15:23:37.536	0.973269685	0.974230534	0.943296513	0.945340933	0.942572426	0.942291065	0.948773255	0.951069014	0.952579075	0.955751923	0.957380297	0.959878202	0.961266636	0.96180075	0.969860552	0.981848914	0.970870332	0.987298107
15:23:38.400	0.971642031	0.976737949	0.942924285	0.945127357	0.942198284	0.941912114	0.948097528	0.950323438	0.951790855	0.954646792	0.956460212	0.958855912	0.96017823	0.960796378	0.968980301	0.981339999	0.970472216	0.98701079
15:23:39.264	0.972203222	0.976125972	0.942709899	0.944909854	0.941754404	0.941590892	0.947421583	0.949502675	0.950951877	0.953482877	0.955411529	0.957667335	0.958981701	0.959467221	0.967960502	0.980743784	0.970043166	0.986632652
15:23:40.128	0.973674332	0.970876085	0.942438317	0.944551788	0.941254722	0.940978209	0.94642107	0.948358493	0.949763442	0.952046621	0.953734875	0.956005311	0.957331022	0.957834212	0.966289883	0.979433261	0.968840411	0.985419995
15:23:40.992	0.97150686	0.972427611	0.942247541	0.944321592	0.940894909	0.940648632	0.945809532	0.947591292	0.948824897	0.950990483	0.952617953	0.954973745	0.956373219	0.956830464	0.965549734	0.979147466	0.968529397	0.98543213
15:23:41.856	0.971710728	0.976254365	0.941995682	0.944029201	0.940463904	0.94020153	0.945022354	0.946766659	0.94795032	0.949826505	0.951382829	0.953728654	0.955107943	0.955625273	0.964579844	0.978674325	0.968094984	0.985199302
15:23:43.584	0.969787297	0.974798775	0.941864804	0.943758979	0.940039905	0.939756698	0.944265179	0.945808771	0.946966328	0.948632559	0.949992172	0.952309981	0.953585997	0.954159037	0.963274164	0.977800218	0.96750126	0.984550964
15:23:44.448	0.972069615	0.971235263	0.941518751	0.943577578	0.939630681	0.939294694	0.943490899	0.945007842	0.946036327	0.94755903	0.948900972	0.95107449	0.952501421	0.95289812	0.962264045	0.977144473	0.967181332	0.984142496
15:23:45.312	0.9729172	0.97316426	0.941336002	0.943377689	0.939283987	0.939019979	0.942927183	0.944322095	0.945334984	0.947026378	0.948028039	0.950192241	0.951515762	0.951991276	0.961520716	0.976731086	0.966906429	0.98387915
15:23:46.176	0.971095153	0.97504796	0.941258402	0.943162579	0.93901515	0.938627625	0.94236186	0.943707244	0.944610801	0.946369381	0.94715126	0.949255189	0.950539574	0.951166964	0.960737566	0.976246041	0.966572781	0.983521568
15:23:47.040	0.971123648	0.973748184	0.941110084	0.942998114	0.93872919	0.938479073	0.941860682	0.943060831	0.943682454	0.945605312	0.946258306	0.948211278	0.949544638	0.95017332	0.959669983	0.975343007	0.965594018	0.982675915
15:23:47.904	0.971233212	0.973164636	0.94103	0.942924659	0.93853972	0.938337186	0.941566788	0.942705305	0.94339905	0.945081603	0.945737804	0.947793929	0.949088162	0.949635985	0.95929634	0.975182539	0.965410197	0.982576219
15:23:48.768	0.970779613	0.96971622	0.941042301	0.942902376	0.938434844	0.938169484	0.941265263	0.942414977	0.942978775	0.944725205	0.945269382	0.94734956	0.948694006	0.94928934	0.958927729	0.974918528	0.965226095	0.982410231
15:23:49.632	0.970534725	0.97122668	0.941001793	0.942815519	0.938384738	0.938087519	0.941182788	0.942277276	0.942786394	0.944616212	0.945131115	0.947182583	0.948511723	0.948980052	0.95879787	0.974969397	0.965247666	0.982504378
15:23:51.360	0.97154164	0.97428498	0.9409417	0.942802294	0.938360707	0.938099633	0.941043911	0.942083817	0.942750207	0.944476364	0.944905242	0.94690879	0.948272572	0.948771737	0.958504595	0.974653802	0.964956635	0.982199974
15:23:52.224	0.97156916	0.97093589	0.940958794	0.942933762	0.938377527	0.937989732	0.940998913	0.942074007	0.942664945	0.944362638	0.944725057	0.946763279	0.948100628	0.948619616	0.958326258	0.974501035	0.964764297	0.982058999
15:23:53.088	0.971817554	0.974416014	0.94102114	0.942949283	0.93851743	0.938234536	0.94114616	0.942224705	0.942856939	0.944490693	0.944989627	0.946967875	0.948299402	0.948788444	0.958606631	0.974782518	0.965017346	0.982312748
15:23:53.952	0.970780539	0.973397451	0.941180836	0.943086384	0.938610506	0.938311275	0.941363718	0.94238558	0.943118584	0.944694238	0.945244733	0.947166456	0.948467258	0.949095023	0.958800789	0.974824867	0.965051019	0.982380778
15:23:54.816	0.9716268	0.973315698	0.941283817	0.943177322	0.938761363	0.938493744	0.941567001	0.942618175	0.943354641	0.944807176	0.945494926	0.947452157	0.948771885	0.949318678	0.959028323	0.97500924	0.965265864	0.982474735
15:23:55.680	0.973034598	0.973725801	0.941405399	0.943305952	0.938942811	0.938595009	0.941772524	0.942896989	0.943721627	0.945055765	0.945813209	0.947980175	0.949269373	0.949821903	0.959567294	0.975431256	0.965907331	0.982925204
15:23:56.544	0.972688076	0.97349322	0.941484123	0.943394564	0.939094255	0.938773706	0.941982972	0.943095581	0.943941352	0.94508093	0.946072	0.948195035	0.949551872	0.950103414	0.959790406	0.975627066	0.966082742	0.983045929
15:23:58.272	0.971745368	0.972819195	0.941689565	0.943511772	0.939175817	0.938875764	0.942231518	0.943312106	0.944187945	0.945394658	0.946363902	0.94857299	0.949903819	0.950419176	0.960090982	0.975845334	0.966247806	0.983261887
15:23:59.136	0.972730262	0.973147188	0.941854626	0.943673412	0.939408727	0.939100339	0.942426711	0.943594035	0.944411252	0.945459046	0.946720423	0.948925621	0.950282044	0.950882978	0.960480065	0.97620785	0.966382746	0.983536795
15:24:00.000	0.971562283	0.974343625	0.941908882	0.943778029	0.939525423	0.939153654	0.942622918	0.943767616	0.944535967	0.945682027	0.946882074	0.949111173	0.950442643	0.951005761	0.960524454	0.976075072	0.966118303	0.983285891
15:25:15.168	0.972985647	0.981035585	0.944662365	0.94629605	0.940773795	0.940421072	0.940853516	0.941047146	0.940732308	0.942037985	0.941104588	0.943337019	0.944778277	0.945203669	0.955381205	0.972561661	0.963105811	0.980868209
15:25:16.032	0.97398136	0.975507244	0.944834081	0.946308306	0.940740126	0.94042671	0.940865411	0.941064109	0.940937781	0.941868091	0.941261071	0.943311261	0.944672989	0.945246456	0.955400465	0.972566656	0.963326578	0.980737765
15:25:16.896	0.973775999	0.980254439	0.945082084	0.946573279	0.940957208	0.940653036	0.941187097	0.941401102	0.941325645	0.942288538	0.94184228	0.943929948	0.94522235	0.945919983	0.9561327	0.97360598	0.964460121	0.981739187
15:25:18.624	0.974523483	0.976618222	0.945059442	0.94658568	0.940930769	0.940614944	0.941091574	0.94128873	0.941176663	0.942069132	0.941712346	0.94372376	0.945026862	0.945716199	0.955920153	0.973377827	0.964293568	0.981543142
15:25:19.488	0.974112355	0.97726617	0.945177103	0.946566512	0.940923039	0.940741176	0.941018437	0.941108339	0.940988136	0.941772816	0.941348021	0.943397439	0.944674609	0.945317805	0.955535278	0.972851813	0.963770313	0.980982536
15:25:20.352	0.974494656	0.976079869	0.945249677	0.946633022	0.940982743	0.940745145	0.941043881	0.941203646	0.941084985	0.941935283	0.941449101	0.943439071	0.944742152	0.94537606	0.955583748	0.972957349	0.963716363	0.981073664
15:25:21.216	0.974956627	0.976339112	0.945426687	0.946834246	0.941156375	0.940940038	0.941327747	0.941457597	0.941270131	0.942260294	0.941823006	0.943849196	0.945109154	0.945759575	0.955972244	0.973369586	0.964197514	0.981501334
15:25:22.080	0.976906984	0.977391352	0.945430166	0.946923984	0.941312088	0.941075189	0.941532367	0.941697224	0.941596609	0.942395756	0.942183536	0.944200744	0.945493034	0.946069853	0.956294202	0.973620198	0.96437897	0.981716813
15:25:22.944	0.975986721	0.976255066	0.945601661	0.947069967	0.94152008	0.941230439	0.941805466	0.941965308	0.941880345	0.942683336	0.94254269	0.944496353	0.945965436	0.946519276	0.956656659	0.973838586	0.964581567	0.981930637
15:25:23.808	0.974747201	0.978199656	0.945668337	0.94716661	0.941634437	0.941387163	0.94190207	0.942055803	0.94206145	0.942780001	0.942568123	0.944473315	0.945897264	0.9465029	0.956491354	0.97355247	0.964298112	0.981591036
15:25:24.672	0.97526768	0.975743001	0.945869554	0.947328185	0.941799233	0.941520233	0.942185893	0.942335642	0.942283903	0.942867538	0.942943985	0.944899214	0.94630433	0.946840471	0.956856232	0.973765174	0.964418035	0.981777328
15:25:26.400	0.975385948	0.977051899	0.945926107	0.947439892	0.941867927	0.941607944	0.942268843	0.94246298	0.942415066	0.943018697	0.943102664	0.944992491	0.946391937	0.946930795	0.956834982	0.973662214	0.964328214	0.981615213
15:25:27.264	0.974859387	0.978925324	0.946071851	0.947451744	0.941999735	0.941659081	0.942294588	0.942511531	0.942476635	0.943131137	0.94311712	0.945020783	0.946392356	0.946853918	0.956789376	0.973580847	0.964168883	0.981505713
15:25:28.128	0.975118532	0.976390431	0.946068392	0.947609308	0.942095398	0.941693783	0.942458545	0.9426586	0.942541929	0.943173298	0.943331548	0.945170721	0.94664757	0.947144042	0.957037434	0.973909972	0.96449402	0.981816604
15:25:28.992	0.975926374	0.978928656	0.946164601	0.947616277	0.942114598	0.941885673	0.942447559	0.9426261	0.942650862	0.943087403	0.943298029	0.945125909	0.946575302	0.947101468	0.957016832	0.973981794	0.964520247	0.981903981
15:25:29.856	0.975689371	0.979617814	0.946150742	0.947601062	0.94210023	0.941776156	0.942293558	0.94238978	0.942409666	0.942992785	0.942986953	0.944858003	0.946295636	0.946809665	0.956766235	0.973834151	0.9644572	0.981802861
15:25:30.720	0.975504636	0.976962436	0.946038582	0.947521978	0.941889636	0.94162372	0.942034499	0.942068945	0.941864286	0.942369111	0.942453214	0.94427332	0.94571096	0.946074513	0.95620907	0.973351092	0.964032916	0.981416256
15:25:31.584	0.975391436	0.975814879	0.946018318	0.947491626	0.94181563	0.941480508	0.941745521	0.941749807	0.941627426	0.941985935	0.941937172	0.943722948	0.945181547	0.945682962	0.955792729	0.973076997	0.963844044	0.981212876
15:25:33.312	0.975620935	0.975903299	0.94591165	0.94734384	0.941592424	0.941313411	0.941323081	0.941260671	0.940993162	0.941396518	0.941157943	0.943012186	0.944362121	0.944960976	0.955090602	0.972538157	0.963385553	0.980820502
15:25:34.176	0.975796371	0.977763043	0.945914687	0.947224108	0.941349565	0.941088549	0.940922187	0.940795042	0.940522898	0.940970491	0.940515989	0.94233983	0.943705526	0.944337102	0.954528104	0.972297049	0.963225555	0.980730922
15:25:35.040	0.97409073	0.977768752	0.945591126	0.947077171	0.9410948	0.940841519	0.940490512	0.940275032	0.940014357	0.940452313	0.939712831	0.941582355	0.942916954	0.9435175	0.953935041	0.972096973	0.963094906	0.980685936
15:25:35.904	0.975162349	0.977405544	0.945474916	0.946832965	0.940670518	0.940480475	0.939803811	0.939484684	0.939146758	0.939479943	0.938530935	0.940455746	0.941834008	0.942377306	0.952940529	0.971331999	0.962495408	0.980042584
15:25:36.768	0.974520956	0.973049501	0.945175612	0.946497631	0.940175158	0.939922813	0.938969596	0.938517078	0.937988597	0.938175153	0.937192005	0.939024509	0.940411203	0.940922771	0.951657831	0.970360261	0.961790272	0.979266275
15:25:37.632	0.973601139	0.975917459	0.94485242	0.946191607	0.9397173	0.939380864	0.938125281	0.937542035	0.936954283	0.936892244	0.935988083	0.93759773	0.939043575	0.939640272	0.950383915	0.969595678	0.961191842	0.978671786
15:25:38.496	0.973908952	0.975070313	0.944474167	0.945860384	0.939123445	0.938886475	0.937205319	0.936435401	0.935817529	0.935394778	0.934489207	0.936143995	0.937617364	0.938041873	0.949115965	0.968928586	0.960728684	0.978221532
15:25:39.360	0.973514573	0.974142189	0.944259586	0.945462699	0.938588428	0.938301048	0.936196019	0.935362461	0.934530444	0.93399701	0.932941537	0.93464044	0.936149848	0.936590022	0.947888464	0.968312454	0.960260734	0.97790599
15:25:41.088	0.97344044	0.975474604	0.943881812	0.945074184	0.937959084	0.937711902	0.935183092	0.934202122	0.933174103	0.932515274	0.93122167	0.933026028	0.934415537	0.935020906	0.946593683	0.967480136	0.959748337	0.977339558
15:25:41.952	0.972962625	0.972437294	0.943557837	0.944708786	0.937472981	0.937186946	0.934331034	0.933136214	0.932021294	0.930957353	0.929850053	0.931570869	0.933026722	0.933618003	0.945401947	0.966939185	0.959238513	0.977049035
15:25:42.816	0.9722492	0.976094984	0.943253638	0.944319773	0.936883369	0.9365841	0.933279222	0.931958774	0.930707214	0.929450745	0.928310943	0.929795966	0.931235132	0.931882501	0.943842707	0.965809748	0.958217341	0.976190161
15:25:43.680	0.972552097	0.974335481	0.942909236	0.944010408	0.936381333	0.936013896	0.93243555	0.931040909	0.92978214	0.928207367	0.927050329	0.928464228	0.929896427	0.930457822	0.942611299	0.96504076	0.95757758	0.975567782
15:25:44.544	0.97363788	0.971775693	0.942737434	0.943760779	0.936020211	0.935718629	0.931802638	0.930289543	0.929000943	0.927481742	0.926016843	0.927496101	0.929034602	0.929490428	0.941840148	0.964711202	0.957342693	0.975406568
15:25:45.408	0.973674221	0.973768695	0.942521026	0.943584326	0.935710229	0.935394141	0.931150388	0.929536171	0.928158779	0.92655142	0.924841068	0.926339311	0.927894581	0.928399539	0.940730897	0.963910195	0.956622774	0.974704774
15:25:46.272	0.97299569	0.976908692	0.942427405	0.943415329	0.935420235	0.935135132	0.930724678	0.929042129	0.927574169	0.92592864	0.924064224	0.925542224	0.927100001	0.927551722	0.940054756	0.963538737	0.956347019	0.974480226
15:25:47.136	0.97401017	0.974138953	0.942313377	0.94327312	0.93517245	0.934921856	0.930382201	0.928611699	0.927035677	0.925461158	0.923419678	0.924884692	0.926374207	0.926984652	0.939533238	0.963255253	0.956119103	0.974297976
15:25:48.864	0.972202542	0.979020316	0.94230795	0.943226395	0.935044223	0.934687092	0.930017506	0.928217508	0.926566939	0.925052696	0.922699458	0.924173389	0.925652166	0.92625668	0.938709747	0.962486451	0.955369127	0.973608589
15:25:49.728	0.972122278	0.971725575	0.942322887	0.943142218	0.935021947	0.934714861	0.929905894	0.928091126	0.92647088	0.924978286	0.922566083	0.924046245	0.92561617	0.926167132	0.938722414	0.96260951	0.95546599	0.973772451
15:25:50.592	0.970918124	0.973374112	0.942291549	0.943282109	0.93502608	0.934736893	0.929922883	0.928078885	0.926502253	0.924806979	0.922569608	0.924073913	0.925545	0.926193517	0.938763453	0.962701511	0.955583395	0.973902787
15:25:51.456	0.973639544	0.976679404	0.942277218	0.943307977	0.935068652	0.934760681	0.929918794	0.928117395	0.926453937	0.924831853	0.922668822	0.924209789	0.925576951	0.926255219	0.938835638	0.962833488	0.955691866	0.97399009
15:25:52.320	0.972314691	0.973975238	0.942363063	0.943305677	0.935006427	0.934689884	0.929841165	0.927960307	0.926345292	0.924730885	0.922337509	0.923853173	0.925262061	0.925904695	0.938415563	0.962312964	0.955082813	0.973459202
15:25:53.184	0.972418809	0.973540325	0.942370376	0.943298557	0.935016809	0.934685616	0.929784697	0.92790648	0.926313813	0.924470477	0.922234247	0.923747689	0.925124585	0.925799828	0.938258375	0.962113116	0.954990863	0.973274349
15:25:54.048	0.972910401	0.975806261	0.942572421	0.943351699	0.93512755	0.934816646	0.929870864	0.927989601	0.926355571	0.924643224	0.922501418	0.923933787	0.925323784	0.925987263	0.938484799	0.962368821	0.955298489	0.973499089
15:25:55.776	0.972614287	0.975181167	0.942528437	0.943449339	0.935259563	0.934938685	0.930021089	0.928199436	0.926618889	0.924801618	0.922775173	0.924238512	0.92573903	0.92630923	0.93885697	0.962781282	0.955724267	0.973941475
15:25:56.640	0.972524669	0.975386988	0.942697024	0.943471691	0.935246406	0.934954999	0.930043597	0.928170992	0.926546939	0.924662083	0.922632219	0.924008326	0.925468967	0.926008434	0.938496404	0.962248075	0.955220483	0.973301574
15:25:57.504	0.972843332	0.971523977	0.942654028	0.943602224	0.935392382	0.935047081	0.930200484	0.928337333	0.926723283	0.92492051	0.922913645	0.92422893	0.925782553	0.926246305	0.938662969	0.962329196	0.95536153	0.973334239
15:25:58.368	0.974028878	0.976920535	0.942824569	0.943805876	0.935533062	0.935253277	0.930403196	0.9285862	0.927006748	0.925092767	0.923159395	0.924525084	0.926038105	0.926556396	0.938907753	0.962386729	0.955422373	0.973368111
15:25:59.232	0.974131565	0.976600993	0.94300401	0.943933113	0.935794523	0.935496733	0.930790841	0.928994278	0.927358153	0.925413894	0.923816715	0.925159149	0.926692278	0.927088584	0.939591264	0.962894157	0.955997084	0.973862282
15:26:00.096	0.972980338	0.978191449	0.94325364	0.944155601	0.936107285	0.935759208	0.931195663	0.929523656	0.927875154	0.925974616	0.924571761	0.925985545	0.92733885	0.927986318	0.940341976	0.963449472	0.95648262	0.974362318
15:27:16.128	0.986546682	0.975124527	0.952708928	0.954068468	0.948136913	0.947803783	0.947500051	0.947411847	0.947147471	0.94855169	0.947894947	0.949880476	0.951362444	0.951956223	0.961306593	0.976755091	0.969126408	0.98377561
15:27:16.992	0.981779341	0.983166372	0.952762661	0.954124099	0.948256271	0.947977275	0.947990609	0.947861749	0.947524463	0.94883333	0.948515238	0.950485826	0.951927061	0.952530388	0.961892936	0.977045372	0.969431692	0.983975198
15:27:17.856	0.979562564	0.984945256	0.953115655	0.95452586	0.94867899	0.948396235	0.948542997	0.948546952	0.948263803	0.949691507	0.949338497	0.951362575	0.952818074	0.953362946	0.962634083	0.977481285	0.96969354	0.984288791
15:27:18.720	0.982062435	0.985321182	0.953241453	0.954577162	0.948815262	0.948564508	0.948746187	0.948705293	0.948419295	0.949862889	0.949560435	0.951562265	0.953073576	0.95360483	0.962799189	0.977555314	0.969832173	0.984354742
15:27:19.584	0.981188323	0.982721855	0.953179493	0.954625838	0.948804204	0.948605468	0.94872301	0.948747385	0.948434124	0.949942923	0.949711289	0.951589109	0.953172136	0.953630101	0.962905698	0.977659486	0.970067022	0.984494703
15:27:21.312	0.980348127	0.980054906	0.95324288	0.95447955	0.948719779	0.948478218	0.948496181	0.948430661	0.948148889	0.94949105	0.94935672	0.951303144	0.952762926	0.953248321	0.962574102	0.97735562	0.969787918	0.984202131
15:27:22.176	0.981152519	0.983687414	0.953133412	0.954471013	0.948569324	0.948309506	0.948361662	0.948273289	0.947911685	0.949335727	0.949115071	0.951042146	0.952559075	0.953102164	0.962447342	0.977393416	0.969830199	0.984274067
15:27:23.040	0.981688903	0.984671524	0.953206061	0.954489939	0.948525419	0.948283191	0.94820343	0.948105289	0.947802917	0.949181427	0.948937995	0.950887709	0.952480178	0.953005861	0.962452348	0.977536967	0.970036166	0.98453102
15:27:23.904	0.981814141	0.98169339	0.953132283	0.954472232	0.948485292	0.948303709	0.948123418	0.947991894	0.947630366	0.949027423	0.948796203	0.950850689	0.952392121	0.952898791	0.96242295	0.977623924	0.970137509	0.984620623
15:27:24.768	0.980507921	0.982596413	0.953180199	0.954421502	0.948487218	0.948315849	0.948125247	0.948015932	0.947653763	0.949136941	0.948954698	0.950931324	0.952584776	0.953018173	0.962675212	0.977978623	0.970424942	0.984992714
15:27:25.632	0.981178628	0.981474527	0.953197278	0.954486187	0.948550739	0.948300606	0.948132792	0.948018735	0.947581709	0.948998004	0.948872695	0.950843161	0.952440586	0.952895434	0.962545773	0.977834802	0.970179005	0.984828765
15:27:26.496	0.982026149	0.984145662	0.953276133	0.954506526	0.948558117	0.948327784	0.948073207	0.947951851	0.947437578	0.948919413	0.94869007	0.950673563	0.95218082	0.952690205	0.962202079	0.977385313	0.969693172	0.984367221
15:27:27.360	0.982039823	0.983670818	0.953340514	0.95468483	0.948690053	0.948439231	0.948172732	0.948102679	0.947582986	0.948964729	0.948867466	0.950824589	0.952418712	0.952799553	0.962324017	0.977441222	0.96965141	0.984371371
15:27:29.088	0.981425023	0.986882651	0.953447694	0.954808338	0.948891291	0.948634835	0.948444637	0.948385916	0.947927177	0.94921361	0.949136817	0.951065704	0.952689026	0.953077588	0.96248533	0.977464934	0.969679772	0.984358245
15:27:29.952	0.981853571	0.980750804	0.953659936	0.955011529	0.949081771	0.948820392	0.948716194	0.948649842	0.948164526	0.949446151	0.94941669	0.951448563	0.952925149	0.953330451	0.96267807	0.977511306	0.969549253	0.984326234
15:27:30.816	0.982434992	0.983895186	0.953786699	0.955199998	0.949253762	0.948997962	0.948932928	0.948864491	0.948347067	0.949508572	0.949648386	0.951589233	0.953073525	0.953447668	0.962686858	0.977325846	0.969374408	0.984074259
15:27:31.680	0.98233256	0.985712096	0.953913902	0.95534959	0.949489148	0.949209349	0.949213929	0.949261719	0.948823793	0.949964971	0.950166594	0.952137962	0.953553919	0.954080763	0.963273425	0.977823512	0.969884149	0.984510968
15:27:32.544	0.9816492	0.98212637	0.954003785	0.955414333	0.949650691	0.949442038	0.949548164	0.949561537	0.949149644	0.950311633	0.950642412	0.952674895	0.954161972	0.954639929	0.964010213	0.978525273	0.970620642	0.985312565
15:27:33.408	0.983510814	0.984513712	0.954177303	0.955525333	0.949720023	0.949547746	0.949598864	0.949644424	0.949196041	0.950271022	0.950913315	0.952844743	0.95430529	0.954812928	0.964261535	0.978805395	0.970923733	0.985568538
15:27:34.272	0.982809408	0.985233021	0.954213277	0.955539626	0.949776041	0.949601478	0.949662756	0.949742932	0.949298034	0.950393486	0.950994309	0.952955489	0.954424929	0.954860963	0.964424665	0.979030733	0.971053648	0.985703222
15:27:35.136	0.981666801	0.984149368	0.954237919	0.955549243	0.949758311	0.949528413	0.94964903	0.949636962	0.94910911	0.950267556	0.950859583	0.952827429	0.954302641	0.954767013	0.964295318	0.978935765	0.971062214	0.985668233
15:27:36.864	0.981391219	0.983277669	0.954142865	0.955601955	0.949709976	0.949504135	0.949464881	0.949476591	0.948984559	0.950142114	0.950640967	0.952565423	0.954074635	0.954555993	0.964061869	0.978709748	0.970822611	0.98545572
15:27:37.728	0.983063519	0.985113144	0.954298873	0.955571222	0.94966568	0.949436968	0.949339117	0.949336239	0.948868152	0.949817623	0.950429117	0.952269196	0.953749777	0.954182724	0.963689287	0.978306544	0.970478294	0.985101448
15:27:38.592	0.981657728	0.98075275	0.95420514	0.955594981	0.949639497	0.949449417	0.949228271	0.949296798	0.948715955	0.949850305	0.950211569	0.952084351	0.953535225	0.954015099	0.963439538	0.978027384	0.970076953	0.984827697
15:27:39.456	0.982349655	0.986516385	0.954333475	0.955686161	0.949752394	0.949553366	0.949348218	0.949410593	0.948903867	0.949844508	0.950320516	0.952221607	0.953680222	0.954117646	0.963610606	0.978203912	0.970245351	0.984937347
15:27:40.320	0.981661841	0.984500151	0.954280002	0.955650297	0.949668127	0.949424733	0.949150516	0.949127376	0.948572778	0.949542492	0.949811393	0.951690471	0.953103559	0.953467996	0.962900179	0.977417062	0.969380352	0.984134707
15:27:41.184	0.981915724	0.986593994	0.954400691	0.955751027	0.9497422	0.949469887	0.949229172	0.949237758	0.948676465	0.949734819	0.949968126	0.951849869	0.953274086	0.953762241	0.963155116	0.977835827	0.9698218	0.984570027
15:27:42.048	0.982185035	0.986961431	0.954422375	0.955736702	0.949791327	0.949502458	0.9492196	0.949201656	0.948698995	0.949651159	0.949894521	0.951823088	0.953264459	0.953721566	0.963242675	0.978001002	0.970045307	0.984777527
15:27:43.776	0.982180188	0.98335444	0.954387724	0.955748404	0.949716781	0.949505679	0.949058791	0.949036051	0.948464229	0.949330493	0.94965321	0.9514918	0.952977258	0.953356913	0.96290198	0.97767936	0.969827312	0.984528221
15:27:44.640	0.983197823	0.98374654	0.95449143	0.955696617	0.949680268	0.949341052	0.948902715	0.948879447	0.948313146	0.949166788	0.949406324	0.9513329	0.952733933	0.953229845	0.962767679	0.977756568	0.969783134	0.984578165
15:27:45.504	0.981966262	0.9834879	0.954445986	0.955724942	0.949619333	0.949344885	0.948817543	0.948734648	0.948106142	0.949044171	0.949233013	0.951110572	0.95258144	0.953027347	0.962706465	0.977841053	0.969951108	0.984725501
15:27:46.368	0.98240487	0.984570507	0.954323606	0.955637642	0.949471478	0.949185224	0.948518626	0.948371875	0.947708207	0.948561353	0.948708899	0.950575964	0.951959655	0.952337088	0.962071167	0.977212421	0.969320109	0.984147046
15:27:47.232	0.983373389	0.986286748	0.954350669	0.955638381	0.949414491	0.949204034	0.94833029	0.948169675	0.947537877	0.948254571	0.948410978	0.950284409	0.951721024	0.952144746	0.96186047	0.9771042	0.969218532	0.984107928
15:27:48.096	0.981078322	0.984100195	0.95436859	0.955553251	0.949291404	0.949105949	0.948211049	0.948006287	0.947298808	0.948045532	0.948271687	0.950170135	0.951556456	0.952071276	0.961825809	0.977263714	0.969398834	0.984302176
15:27:48.960	0.982050696	0.981785939	0.954258981	0.95550966	0.949155127	0.948975202	0.947901298	0.947692353	0.946943665	0.947669506	0.94767833	0.949556434	0.950913942	0.951500099	0.961173609	0.976606005	0.968819052	0.983732078
15:27:49.824	0.983443579	0.982468054	0.954366273	0.955505459	0.949137566	0.948914504	0.947812269	0.947553664	0.94679238	0.947420723	0.947453088	0.949367321	0.950772012	0.951319423	0.961066663	0.976657458	0.968882776	0.983810185
15:27:51.552	0.981325686	0.982986523	0.954270485	0.955491461	0.949059624	0.948826158	0.947577044	0.947313422	0.946554806	0.947176488	0.947043867	0.949000429	0.950342604	0.950914297	0.960629109	0.976300605	0.96863485	0.98350378
15:27:52.416	0.982323432	0.984356078	0.954204163	0.955490333	0.948954468	0.948743373	0.947404779	0.947094906	0.946309622	0.94687367	0.946676017	0.948560422	0.949977428	0.950500129	0.960203136	0.975992049	0.968268273	0.983248682
15:27:53.280	0.982531983	0.981869715	0.954259447	0.955461066	0.948891914	0.948655903	0.947215759	0.946814644	0.945995824	0.946658483	0.946290221	0.948232213	0.949600668	0.950056509	0.959786234	0.975730441	0.96809948	0.983052299
15:27:54.144	0.983444767	0.986454568	0.954218686	0.955410689	0.948830258	0.948594614	0.947050033	0.946691664	0.945873962	0.946344514	0.946084586	0.947951072	0.949381531	0.949870117	0.959664309	0.975812278	0.968180922	0.983189225
15:27:55.008	0.982572961	0.987803143	0.954219372	0.955323897	0.94869166	0.948438221	0.946754915	0.94630156	0.945330885	0.945925836	0.945449721	0.947365556	0.948762092	0.94921738	0.959049596	0.975291719	0.967736235	0.982781146
15:27:55.872	0.982434436	0.985195977	0.954069519	0.955264394	0.948547769	0.948367964	0.946510879	0.946008935	0.945115861	0.945583307	0.945069179	0.946919519	0.948400966	0.94882089	0.958776927	0.975268398	0.967771835	0.982892129
15:27:56.736	0.982581976	0.982467859	0.954125696	0.955126513	0.948302863	0.948164864	0.94607526	0.945556117	0.944515558	0.944995513	0.944342133	0.946149736	0.947686747	0.94807338	0.958197972	0.975000752	0.967621934	0.982754051
15:27:57.600	0.983056599	0.983905857	0.953725214	0.954976937	0.94803439	0.947813078	0.945501742	0.944862623	0.943734479	0.944327425	0.94338364	0.945201529	0.946646482	0.947153339	0.957402721	0.9745591	0.967273804	0.982457337
15:27:59.328	0.981797205	0.980431718	0.95368229	0.954757828	0.947687687	0.947365296	0.944865239	0.944088855	0.942989249	0.94354241	0.942234737	0.944072942	0.945390281	0.946082667	0.956276872	0.973652696	0.966427641	0.981741145
15:28:00.192	0.983251734	0.980287771	0.953419025	0.954568149	0.947381476	0.947114657	0.944371177	0.943475234	0.942250708	0.942716569	0.941420184	0.943211667	0.944571484	0.945173538	0.955573551	0.973225952	0.966197435	0.981455928
15:29:15.360	0.988611689	0.981411438	0.960882707	0.962177722	0.956237988	0.955711205	0.954922295	0.95486039	0.95436839	0.956042958	0.955194754	0.956920806	0.958075553	0.958711131	0.967165104	0.980846199	0.972486169	0.98696672
15:29:16.224	0.988259571	0.987841834	0.96080443	0.962150982	0.956057087	0.955880492	0.955122811	0.954884342	0.954242712	0.955613399	0.955178972	0.956737038	0.958113269	0.958516369	0.967177322	0.980791876	0.972574911	0.986939329
15:29:17.088	0.989066444	0.99031453	0.960940375	0.962271498	0.956064589	0.955852366	0.954988838	0.954752743	0.954063383	0.95535633	0.95482737	0.956379683	0.957740516	0.958051128	0.966788141	0.980357169	0.972179004	0.986525053
15:29:17.952	0.98787194	0.9881577	0.960969544	0.962279312	0.956188518	0.955972658	0.955015831	0.954789513	0.954118798	0.955392209	0.954949363	0.956562396	0.957964314	0.958309461	0.967079378	0.980858991	0.972710469	0.987126051
15:29:19.680	0.987917971	0.9862954	0.960884761	0.962234291	0.956016966	0.955823786	0.954777558	0.954497781	0.953908227	0.955070471	0.954536143	0.956083502	0.957453379	0.957815323	0.966647771	0.980524018	0.97238182	0.986801072
15:29:20.544	0.987897042	0.98885464	0.960913875	0.962185381	0.955937808	0.955753772	0.95454211	0.954214709	0.953475553	0.954723166	0.954128835	0.955649495	0.957077887	0.957395213	0.96632598	0.980270866	0.97207124	0.986639366
15:29:21.408	0.988514468	0.991037764	0.960860649	0.96211941	0.955663805	0.955528566	0.954153283	0.953777244	0.952999002	0.954153651	0.953525637	0.955016441	0.956359469	0.956823013	0.965651914	0.979660349	0.971499254	0.986098743
15:29:22.272	0.988801867	0.989361938	0.960703313	0.962024837	0.955555653	0.9553347	0.953908296	0.953471327	0.952725277	0.953690183	0.953092711	0.954620834	0.955924493	0.956358743	0.96532187	0.979483877	0.971381131	0.985999359
15:29:23.136	0.987990129	0.986435212	0.960637709	0.96189838	0.955387718	0.955131736	0.953563587	0.953084424	0.952315616	0.953179868	0.952575436	0.9541282	0.955367857	0.955867584	0.964852047	0.979163405	0.971145369	0.98574515
15:29:24.000	0.988731891	0.986691251	0.960585593	0.961749372	0.95522487	0.954966634	0.953228541	0.952737087	0.951919932	0.952619304	0.952063959	0.953626695	0.954900612	0.955428833	0.964484938	0.979024319	0.971043775	0.985703209
15:29:24.864	0.988795722	0.987888042	0.960327567	0.961621719	0.95491069	0.954752141	0.952738483	0.952140163	0.951234029	0.951951096	0.951182265	0.952732862	0.954057933	0.954511418	0.963517465	0.978186729	0.970373597	0.984928745
15:29:26.592	0.987740009	0.989153375	0.960302717	0.961554149	0.95478823	0.954564052	0.952473912	0.951815972	0.950871409	0.951565978	0.950736518	0.952300241	0.953683074	0.954097232	0.963238775	0.978176774	0.970286328	0.985050823
15:29:27.456	0.987101335	0.988210651	0.960254695	0.961409354	0.954616839	0.954366436	0.952119712	0.951447614	0.950488672	0.951028691	0.950149919	0.951763214	0.953209948	0.95351461	0.962808984	0.977858289	0.969939296	0.984800842
15:29:28.320	0.988929782	0.98676774	0.96009651	0.961330571	0.954445057	0.954196528	0.951844279	0.951103011	0.950075658	0.950546721	0.949691108	0.95127118	0.952690309	0.953105663	0.962420256	0.977636423	0.969743509	0.98467271
15:29:29.184	0.988536629	0.988935214	0.96009321	0.961282985	0.954282231	0.954131311	0.95163787	0.950865885	0.949761879	0.950289241	0.94939552	0.951081411	0.952508269	0.952855686	0.96234764	0.977764565	0.969880414	0.984915881
15:29:30.048	0.986875283	0.98813065	0.959974931	0.961131637	0.954125458	0.953974103	0.951330408	0.95054264	0.949485922	0.94983159	0.948962198	0.950627471	0.951908663	0.95237976	0.961837993	0.977370335	0.969546636	0.984580259
15:29:30.912	0.986322761	0.986326087	0.959847816	0.961084959	0.954112916	0.953866232	0.951167484	0.950378662	0.949323086	0.949780105	0.948829569	0.95049573	0.951900043	0.952298875	0.961912477	0.977587351	0.969747492	0.984811085
15:29:31.776	0.98609318	0.985635172	0.959935413	0.961101997	0.95401111	0.953743553	0.951045862	0.950213205	0.949090151	0.949521045	0.948602278	0.950286737	0.951678857	0.952086012	0.96178128	0.977541368	0.969735391	0.984824831
15:29:32.640	0.986941083	0.98615878	0.959758301	0.960968649	0.953850723	0.953560615	0.950800346	0.949886994	0.9488016	0.949162006	0.948119309	0.949843743	0.95118506	0.951594789	0.961313774	0.977130522	0.969286605	0.98444003
15:29:34.368	0.986861122	0.988245871	0.95984903	0.960923947	0.953679224	0.953483213	0.950500725	0.94958177	0.948379653	0.948678487	0.947793561	0.949378326	0.95078995	0.951168959	0.960897909	0.976760065	0.968901262	0.984091129
15:29:35.232	0.986883132	0.987102499	0.95972547	0.960870434	0.953588915	0.953381349	0.950311723	0.949389778	0.948164747	0.948585221	0.947512748	0.949145483	0.950526526	0.95077971	0.960646137	0.976511629	0.968637317	0.983910848
15:29:36.096	0.986549393	0.987952416	0.959679329	0.960721823	0.953439118	0.953294397	0.950064417	0.949086786	0.94787707	0.948094861	0.947110637	0.948644787	0.950035164	0.950311544	0.960125375	0.976074314	0.96816559	0.983385146
15:29:36.960	0.986744143	0.986436563	0.959740368	0.960745317	0.953431516	0.953269368	0.949992982	0.94906568	0.947908666	0.948133095	0.947123761	0.948695075	0.950070265	0.950405684	0.960254056	0.976277875	0.968386907	0.983653122
15:29:37.824	0.985628312	0.984869617	0.959747099	0.960786096	0.953444677	0.953250461	0.950111221	0.949120529	0.947819678	0.948153908	0.947167332	0.948761514	0.950177504	0.950409498	0.960395083	0.976451949	0.968636713	0.98390324
15:29:38.688	0.987151061	0.988551967	0.959859047	0.960904618	0.953548311	0.953356912	0.950146679	0.949255629	0.948039342	0.948295498	0.947339097	0.94898309	0.950365354	0.950749978	0.960625017	0.976738524	0.96877882	0.984158571
15:29:39.552	0.98633892	0.99062014	0.959786759	0.960826501	0.95353446	0.953382059	0.950110773	0.94920777	0.948065747	0.948226748	0.947225218	0.948886942	0.950271044	0.950567132	0.960482393	0.976473761	0.96850182	0.983875523
15:29:40.416	0.98698717	0.989556746	0.959773787	0.960914547	0.953601564	0.953366899	0.950231205	0.949335566	0.948148284	0.948435159	0.947374889	0.949007979	0.950412054	0.950766199	0.960597339	0.976533656	0.968509395	0.983884899
15:29:42.144	0.987573644	0.988444789	0.960056966	0.96107158	0.953785421	0.953515304	0.950385147	0.949499728	0.948294621	0.948665663	0.947561037	0.949263867	0.950605623	0.95108635	0.960755072	0.976577639	0.968527765	0.983896409
15:29:43.008	0.98671862	0.987921163	0.960088124	0.961131873	0.953862424	0.953658502	0.950529913	0.949652516	0.948486634	0.948803321	0.947830576	0.949486338	0.95086559	0.951269624	0.960997954	0.976843123	0.96875402	0.984080002
15:29:43.872	0.987117772	0.989457031	0.960157033	0.961247705	0.954009327	0.953766441	0.950670033	0.949869886	0.948666574	0.94911324	0.948148857	0.94976458	0.951086273	0.951474182	0.961245473	0.976955315	0.968859309	0.984207914
15:29:44.736	0.987790199	0.988865848	0.960283511	0.961352011	0.954164595	0.953907927	0.950865431	0.950050355	0.948870886	0.949301998	0.948396026	0.949994294	0.951259651	0.951828329	0.96142062	0.977110936	0.968941807	0.984277159
15:29:45.600	0.988384765	0.988144375	0.960383893	0.961377458	0.954276769	0.953976881	0.950964032	0.950203294	0.949054045	0.94951548	0.948563675	0.950142906	0.951340359	0.95189238	0.961508933	0.977101108	0.968914022	0.984241279
15:29:46.464	0.987952828	0.991077072	0.960483385	0.961569649	0.954361745	0.954075302	0.951150007	0.950341382	0.949154302	0.949793334	0.948743404	0.950314609	0.951521275	0.952081928	0.961676485	0.977152861	0.968949023	0.984297781
15:29:47.328	0.987439972	0.987658042	0.960670643	0.961708614	0.954647319	0.954430777	0.951497359	0.950783952	0.949626706	0.950289731	0.949336899	0.950898201	0.952212284	0.952679963	0.962379343	0.977859129	0.96972687	0.98503585
15:29:49.056	0.988347491	0.986878951	0.960737538	0.961856897	0.954698335	0.95449557	0.951608478	0.950939217	0.949739638	0.950494686	0.949527585	0.951125552	0.952444876	0.952853435	0.962523869	0.978010609	0.969825196	0.985128819
15:29:49.920	0.9878982	0.992125833	0.960785095	0.961847295	0.954752969	0.954469674	0.951684441	0.950934352	0.949737582	0.950484094	0.949443134	0.950920002	0.952320735	0.95273892	0.962240435	0.977572716	0.969356534	0.984645057
15:29:50.784	0.987570454	0.99132048	0.960962387	0.961941798	0.954832024	0.954603331	0.95172583	0.950985802	0.949851143	0.950538031	0.949528509	0.951005683	0.952322658	0.95277501	0.962266485	0.97752924	0.9692081	0.984549377
15:29:51.648	0.987973306	0.988940128	0.960920432	0.962033493	0.954930585	0.95470837	0.951869905	0.951158348	0.950014592	0.950837774	0.949809502	0.951280269	0.952634001	0.953026883	0.962521589	0.977770192	0.969460453	0.984772428
15:29:52.512	0.9883589	0.990693928	0.96098225	0.962094256	0.954985314	0.954711237	0.951908688	0.951225448	0.950169302	0.95083408	0.949813672	0.951314549	0.952604363	0.953002997	0.962430006	0.977518116	0.969222219	0.984474338
15:29:53.376	0.987989683	0.990982039	0.96119642	0.962247699	0.955221234	0.95496114	0.952269185	0.951616769	0.950544799	0.951321873	0.950429161	0.951960276	0.95333237	0.953796352	0.963203758	0.978381597	0.969915515	0.985309134
15:29:54.240	0.98818676	0.987818159	0.961302976	0.962275792	0.955288955	0.955032551	0.95234593	0.951736046	0.950741273	0.95141282	0.950540023	0.952111662	0.953468544	0.953910679	0.963208944	0.978283722	0.969775629	0.985197051
15:29:55.104	0.98976655	0.988444767	0.961336212	0.962384948	0.955324035	0.95508171	0.952378378	0.951759197	0.950729807	0.951489901	0.950524328	0.952116956	0.953404371	0.953905914	0.963076143	0.978064427	0.96950391	0.984881268
15:29:56.832	0.98858345	0.987272814	0.961326112	0.962464466	0.955537419	0.955193226	0.952622467	0.951987014	0.951004692	0.951788623	0.950805052	0.952460049	0.953681413	0.954114941	0.963377949	0.978252256	0.969568339	0.985040977
15:29:57.696	0.989059751	0.993068907	0.961554523	0.962596326	0.955640244	0.95540198	0.95283852	0.952224343	0.951334456	0.952043105	0.951032698	0.952697102	0.953948834	0.95440449	0.963632707	0.978312735	0.969649307	0.985078159
15:29:58.560	0.989622626	0.987796542	0.961764072	0.962713777	0.955852946	0.955627584	0.953120027	0.95254547	0.951545454	0.952474176	0.951404325	0.953105686	0.954484521	0.954850318	0.964063688	0.978629939	0.969937205	0.985369855
15:29:59.424	0.989439036	0.993325311	0.961777802	0.962875413	0.95603996	0.955716543	0.953366211	0.95284622	0.951939812	0.952707211	0.951948965	0.953546743	0.955008446	0.95525604	0.964483952	0.978952357	0.970218833	0.985674373
15:30:00.288	0.988373814	0.990354401	0.962069856	0.963033789	0.956241687	0.95614133	0.953732645	0.95318544	0.952239683	0.953054603	0.952355478	0.954017547	0.955331075	0.955779008	0.964820704	0.97913509	0.970407454	0.985816991
15:31:16.320	0.996954759	0.995884825	0.965767286	0.966230905	0.95912641	0.959070696	0.955978067	0.955272177	0.954000981	0.954661953	0.954228836	0.955622646	0.956975938	0.957833876	0.966214506	0.97956666	0.970682217	0.985888484
15:31:17.184	0.992876247	0.992909722	0.965518073	0.966405743	0.959358734	0.9591346	0.956235344	0.955469165	0.954318605	0.955115786	0.954538644	0.956056211	0.957443208	0.957796711	0.966674492	0.980175913	0.970943211	0.986444896
15:31:18.048	0.992404659	0.993137542	0.965775536	0.966546773	0.959576785	0.959365043	0.956450726	0.955652646	0.954494471	0.955137646	0.954734849	0.956354301	0.957801592	0.958086474	0.966959761	0.980562697	0.971273524	0.986837575
15:31:18.912	0.992195524	0.991220608	0.965622046	0.966550945	0.959387324	0.959114379	0.956142382	0.955246929	0.954113265	0.954712884	0.954026723	0.955552134	0.95693333	0.957265035	0.966024707	0.979490449	0.97011811	0.98569812
15:31:19.776	0.992836027	0.995088358	0.965700392	0.966463505	0.959294671	0.959076162	0.955976119	0.955023087	0.953881964	0.954468787	0.953756476	0.955187432	0.956539067	0.956860908	0.965646113	0.979125373	0.969535699	0.985290182
15:31:20.640	0.991988547	0.991900066	0.965693036	0.966515046	0.959395476	0.959139784	0.956067468	0.955163367	0.954054184	0.954641411	0.953930734	0.95545909	0.956826753	0.957131326	0.966034419	0.979623187	0.970111225	0.985872164
15:31:21.504	0.991630602	0.995145192	0.965610826	0.966453709	0.959221903	0.958954284	0.955714395	0.954841256	0.953692336	0.954151345	0.953409819	0.954861022	0.956222791	0.956542907	0.965380592	0.978980926	0.969448804	0.985244288
15:31:23.232	0.991851185	0.991451862	0.965640032	0.966510437	0.959254686	0.958999997	0.955760973	0.954784578	0.95351939	0.954101058	0.953339202	0.954828939	0.956180223	0.956544091	0.965469762	0.979149746	0.969594684	0.985438314
15:31:24.096	0.99241413	0.991819169	0.965620891	0.96652773	0.95923866	0.958995002	0.955690533	0.954726219	0.953531624	0.954009384	0.95330804	0.954772743	0.956175537	0.956502222	0.965514016	0.979328973	0.969827826	0.985718329
15:31:24.960	0.991786927	0.994309677	0.965652281	0.966414029	0.959122452	0.958921742	0.95543123	0.954486753	0.953285488	0.9536664	0.952972322	0.954462136	0.955798918	0.956205197	0.965196165	0.979071932	0.969504504	0.985445091
15:31:25.824	0.992310939	0.990742245	0.965577093	0.96633923	0.959024883	0.958732253	0.955264105	0.954249489	0.952938235	0.953292881	0.952593994	0.954109512	0.955475658	0.955841725	0.964849804	0.978830358	0.969315202	0.985242045
15:31:26.688	0.99200129	0.993014228	0.965560282	0.966285245	0.958889669	0.958709465	0.955105561	0.954038437	0.952730784	0.953154425	0.952317294	0.953806514	0.955167364	0.955637474	0.964633158	0.9787375	0.969252487	0.985221955
15:31:27.552	0.99231836	0.993192112	0.965462902	0.966291679	0.958820589	0.958627999	0.954947643	0.953894896	0.952560186	0.952963789	0.952196834	0.953742973	0.95510933	0.955437549	0.964703366	0.979021266	0.969654576	0.985630488
15:31:28.416	0.991800509	0.993189128	0.965420019	0.96618515	0.958693411	0.958424656	0.954638595	0.953505737	0.952147689	0.952480689	0.951642942	0.953200988	0.954583435	0.955028314	0.964199664	0.978597046	0.969355653	0.985287253
15:31:29.280	0.991646276	0.991249758	0.965379661	0.96612131	0.958523947	0.95829408	0.954387523	0.953222846	0.951841436	0.952140531	0.951210506	0.952736305	0.954149189	0.954561814	0.963809317	0.978374884	0.969007705	0.985022626
15:31:31.008	0.992113196	0.990914043	0.965265178	0.965948415	0.958394648	0.958081158	0.954154793	0.952968284	0.951502725	0.951778183	0.950855216	0.952378348	0.95385256	0.954195889	0.963435118	0.978091472	0.968763562	0.984789851
15:31:31.872	0.991795865	0.992845596	0.965252701	0.966003559	0.958347884	0.958097321	0.954039276	0.952874236	0.951424456	0.951740612	0.95073132	0.952334522	0.953733949	0.954126184	0.963482536	0.978194239	0.968942269	0.984996639
15:31:32.736	0.992089459	0.98928938	0.965229575	0.965942425	0.958276443	0.95798905	0.953868103	0.952623482	0.951042307	0.951420812	0.950363063	0.951899949	0.953424503	0.953679219	0.963056045	0.977822745	0.968529671	0.984602598
15:31:33.600	0.991904454	0.991552249	0.965195951	0.965866498	0.958153745	0.957924758	0.953649277	0.952366776	0.950883942	0.951212615	0.950076766	0.95158699	0.953054649	0.953471701	0.962702686	0.977531033	0.968221237	0.984310126
15:31:34.464	0.991919302	0.993064879	0.965198797	0.965773289	0.958031692	0.957805734	0.953429276	0.952117939	0.950548267	0.950799688	0.94959802	0.951148861	0.952561624	0.952908734	0.962160668	0.976983143	0.967716098	0.983728741
15:31:35.328	0.992504646	0.993557705	0.965192193	0.965856901	0.95803952	0.957828625	0.953533714	0.952210511	0.950659842	0.95099029	0.949755693	0.951366399	0.952766426	0.953143232	0.962516934	0.977407228	0.968243698	0.98427952
15:31:36.192	0.990166868	0.992157726	0.96516249	0.965869822	0.958012693	0.957835184	0.953436227	0.952100661	0.950558545	0.950688696	0.949553554	0.951103423	0.952526697	0.952875391	0.962230088	0.977180949	0.96804111	0.984016355
15:31:37.920	0.992552215	0.992479193	0.965238954	0.965949125	0.958016914	0.957820291	0.953455896	0.952114752	0.950515238	0.950591731	0.949531611	0.951014165	0.952480408	0.95282513	0.962150304	0.977079101	0.967941956	0.983948011
15:31:38.784	0.991784861	0.994080013	0.965352057	0.965894453	0.958107407	0.957807467	0.953416885	0.952130365	0.950591429	0.950689672	0.949603132	0.951065349	0.952531294	0.952934135	0.962247574	0.977212526	0.968146297	0.984092746
15:31:39.648	0.992320551	0.994128652	0.965403458	0.966009414	0.958104172	0.957932147	0.953436799	0.952082703	0.950542391	0.950577583	0.949541581	0.951036657	0.952427556	0.952822274	0.96217761	0.977155352	0.968166204	0.984079237
15:31:40.512	0.992217417	0.992587505	0.965289234	0.966052419	0.958091534	0.957908495	0.953400333	0.952044656	0.950562911	0.950546529	0.949466134	0.950957194	0.952381943	0.952783078	0.962137063	0.9771292	0.968157027	0.984056882
15:31:41.376	0.991819523	0.991848863	0.965307062	0.966015058	0.958047819	0.957939346	0.953303154	0.951905971	0.950289313	0.950410706	0.949226936	0.950737008	0.952172731	0.95256547	0.961911283	0.976903924	0.967984073	0.983805905
15:31:42.240	0.991330462	0.992706941	0.965530178	0.966159668	0.958247831	0.958067136	0.953527604	0.952187408	0.950673375	0.950752452	0.949711847	0.951259473	0.952670326	0.953042801	0.962615253	0.977684828	0.968834098	0.984644133
15:31:43.104	0.992845504	0.993710247	0.965530267	0.966080407	0.958257752	0.958080185	0.953540358	0.952195624	0.950682217	0.950703178	0.949739339	0.951215391	0.952628896	0.952985148	0.96258026	0.977625086	0.968854949	0.984558957
15:31:43.968	0.992118373	0.991294705	0.965564862	0.966204045	0.958320987	0.958093512	0.953599946	0.952239561	0.950770538	0.95073901	0.94978252	0.951273143	0.952664565	0.953077245	0.962593877	0.977678113	0.968864097	0.984553122
15:31:45.696	0.992689177	0.99140035	0.965653768	0.966237106	0.958378	0.958183033	0.953649965	0.952289108	0.950741066	0.950682414	0.949788149	0.951285306	0.952716585	0.952975361	0.962579063	0.97759909	0.968773172	0.98445506
15:31:46.560	0.992486523	0.991854336	0.965694996	0.966355301	0.958459777	0.958270868	0.953847534	0.952477061	0.950967283	0.950920443	0.950077187	0.951590547	0.953096786	0.953239499	0.9628792	0.977949754	0.969078892	0.984763368
15:31:47.424	0.991676421	0.994172552	0.965778603	0.966497411	0.95858623	0.958462314	0.95399241	0.952693958	0.951089149	0.951157262	0.950323628	0.951924118	0.953413375	0.953680584	0.963161076	0.978146086	0.969297397	0.984947585
15:31:48.288	0.992451155	0.994171921	0.96586505	0.96657577	0.958798895	0.958568637	0.95418688	0.952888172	0.951323562	0.951328559	0.950542886	0.95217074	0.953593127	0.953896343	0.963248392	0.978142605	0.969270451	0.984886048
15:31:49.152	0.992910708	0.994882017	0.966056723	0.966668171	0.958954914	0.958749793	0.954453434	0.953165452	0.951610424	0.95169603	0.950870459	0.952487876	0.953889724	0.954206341	0.963470208	0.978224113	0.96930588	0.984911303
15:31:50.016	0.993476805	0.995170411	0.966220662	0.966899867	0.959223166	0.958969343	0.954781283	0.953500383	0.951930887	0.952092633	0.951306966	0.952845505	0.954373301	0.954653238	0.963869428	0.978459975	0.969700623	0.98513703
15:31:50.880	0.993298371	0.992231131	0.966355952	0.967046795	0.95937318	0.959159183	0.955070754	0.953848643	0.952288236	0.952601765	0.951721608	0.953254319	0.954756962	0.955015663	0.964181965	0.978668018	0.969963084	0.985275373
15:31:51.744	0.99233666	0.995619454	0.966552014	0.967254597	0.959592779	0.959340305	0.955338384	0.95410128	0.952574589	0.952802862	0.95198613	0.953436979	0.954955078	0.955320275	0.964284721	0.978581531	0.969923539	0.985069989
15:31:53.472	0.993039652	0.994787823	0.966534502	0.967323999	0.959740195	0.959404365	0.955553117	0.95429215	0.95268492	0.952983318	0.952235237	0.953648611	0.955137235	0.955442348	0.964406304	0.978578734	0.969752279	0.985005879
15:31:54.336	0.993626024	0.995407478	0.966745513	0.967464411	0.959936897	0.959631562	0.955783193	0.954607653	0.953057606	0.95335782	0.952537643	0.954013305	0.955466366	0.955870659	0.964768339	0.978756532	0.969974589	0.985142878
15:31:55.200	0.993319876	0.993299755	0.966783697	0.967551025	0.960014411	0.959737756	0.955924446	0.954722976	0.953155666	0.953491165	0.952776688	0.954221153	0.95561052	0.955974805	0.964874254	0.978720968	0.969881173	0.985035393
15:31:56.064	0.992487187	0.995935905	0.966972849	0.967672771	0.960256316	0.960115713	0.956337569	0.95516543	0.953677037	0.954164818	0.953347113	0.954905067	0.956346563	0.956656094	0.965631513	0.979469386	0.970653581	0.985761521
15:31:56.928	0.994809323	0.994481659	0.966980705	0.967823389	0.960370905	0.960085115	0.956410602	0.95530812	0.953775933	0.954284449	0.953486974	0.955001306	0.956460023	0.956742137	0.965659832	0.979424535	0.970558414	0.985620669
15:31:57.792	0.991139368	0.994879062	0.967132851	0.96798751	0.960532392	0.960359683	0.956682583	0.955616646	0.954139484	0.95466058	0.95394206	0.955486823	0.956933346	0.957258923	0.96618586	0.979930572	0.97093416	0.98613286
15:31:58.656	0.993396505	0.993500577	0.967138216	0.96807731	0.960705332	0.960389777	0.956853132	0.955753612	0.954172975	0.954848003	0.95412125	0.95566963	0.957071406	0.957411109	0.966312958	0.979927742	0.970873008	0.98608818
15:32:00.384	0.993948051	0.993295816	0.967365425	0.968198532	0.96078198	0.960606529	0.95703739	0.955937374	0.954426175	0.955122677	0.954357789	0.955872198	0.957275267	0.957662451	0.966483141	0.9800207	0.970910392	0.986135293
15:32:01.248	0.99437142	0.994466215	0.967566664	0.96836017	0.961071535	0.960841366	0.957379322	0.956372074	0.95485124	0.955632342	0.954909394	0.956576428	0.957873983	0.95819752	0.967098889	0.98055938	0.97136538	0.98667276
15:33:15.552	1.003084112	1.00529016	0.976932082	0.978232929	0.973668137	0.973175454	0.974687499	0.975351952	0.975218429	0.977595836	0.978235705	0.9794296	0.980441096	0.980349928	0.98591668	0.991641956	0.982053311	0.994794592
15:33:16.416	1.000793172	1.002909564	0.976981712	0.978383755	0.973775493	0.973580213	0.97490465	0.97551891	0.975397845	0.977846729	0.978277444	0.979674102	0.980625016	0.9806557	0.986087286	0.991874011	0.982165733	0.994726886
15:33:18.144	1.001925692	0.999309	0.977300443	0.978633766	0.974105397	0.973843921	0.975281813	0.975892838	0.975643666	0.978294708	0.978718785	0.980022733	0.980963219	0.98087319	0.986318003	0.991901774	0.982230029	0.9946868
15:33:19.008	1.001536622	1.002326426	0.977487337	0.978845681	0.974261671	0.974038029	0.975574868	0.976230627	0.975917504	0.97865895	0.979100506	0.980402394	0.981408896	0.981310869	0.986828082	0.992400207	0.982702735	0.995163489
15:33:19.872	1.000877504	1.002191086	0.977595131	0.978907794	0.974293608	0.974141842	0.975600594	0.976245324	0.976082152	0.978599939	0.979117433	0.980316858	0.981259812	0.981192063	0.986651527	0.992133042	0.982513177	0.994861652
15:33:20.736	1.001348166	1.002270262	0.977731001	0.978991902	0.974502941	0.974316629	0.975913273	0.976589637	0.976230756	0.979011356	0.979515158	0.98088245	0.981844321	0.981957838	0.987299291	0.992932931	0.983346026	0.995608481
15:33:21.600	1.002187975	1.001557724	0.97779915	0.979115204	0.974607853	0.974429882	0.975957647	0.976663408	0.97637805	0.979257521	0.979711664	0.980964976	0.981965211	0.982086662	0.987393319	0.993032681	0.983442921	0.99570089
15:33:22.464	1.002166565	1.003127749	0.977783344	0.9792296	0.974628834	0.974505886	0.976115287	0.976748606	0.976527424	0.979338455	0.979757837	0.981116455	0.982097941	0.982257982	0.987576016	0.993249225	0.983693891	0.995891804
15:33:23.328	1.001253573	1.001217557	0.977878474	0.97915449	0.974593729	0.974496069	0.975936336	0.976598409	0.9763245	0.979162487	0.979511655	0.980796803	0.981725133	0.981924188	0.987179046	0.99282634	0.98323089	0.995388853
15:33:25.056	1.001976785	1.003966494	0.977856025	0.979230053	0.974696378	0.974487465	0.975971143	0.976681695	0.976371016	0.979242791	0.979641969	0.981016856	0.981926786	0.982099508	0.987397425	0.993028952	0.983463943	0.995710391
15:33:25.920	1.001853796	1.004228807	0.977981247	0.979312055	0.974753518	0.974558199	0.97605922	0.976727092	0.976439445	0.979270374	0.979717757	0.981082164	0.982021192	0.982288321	0.987461736	0.993075269	0.983464644	0.995730432
15:33:26.784	1.001916812	1.00306061	0.978085102	0.979373301	0.974812604	0.974620947	0.976130921	0.976843688	0.976498999	0.979415807	0.979783719	0.98117367	0.982095818	0.982250708	0.987504605	0.993055424	0.983515701	0.995698397
15:33:27.648	1.001843115	1.001478552	0.978123201	0.979455418	0.97488816	0.974700892	0.9762148	0.976919066	0.976627182	0.979354421	0.979907101	0.981219604	0.982144917	0.982289029	0.98754602	0.993056733	0.983556713	0.995712405
15:33:28.512	1.002224884	1.005565028	0.978131846	0.979456	0.974980355	0.974820167	0.976288799	0.977060998	0.976728563	0.979557259	0.980067852	0.981422044	0.982290069	0.982505653	0.987706036	0.993202569	0.983744878	0.995869988
15:33:29.376	1.002016784	0.999243462	0.978212644	0.979575979	0.975038368	0.974823611	0.976353696	0.977100562	0.976821816	0.979564527	0.980024738	0.981353888	0.98219936	0.982403345	0.987561239	0.992938763	0.983559154	0.995574119
15:33:30.240	1.001279299	1.001250684	0.978372645	0.97971014	0.97521742	0.975059744	0.976713031	0.977453096	0.97721766	0.979958969	0.98049763	0.981724132	0.982669467	0.982752446	0.987970254	0.993361435	0.984115272	0.996000338
15:33:31.104	1.002427377	1.004237517	0.978504974	0.979824784	0.975400953	0.975198987	0.976837205	0.977612382	0.977388168	0.980224356	0.980685537	0.981906222	0.982953995	0.983003278	0.988206507	0.993582904	0.984267674	0.996209244
15:33:32.832	1.002949026	1.001202192	0.978576615	0.979954889	0.97553028	0.975337565	0.977019934	0.97781773	0.977561158	0.98034257	0.980960332	0.982124051	0.983185564	0.983121284	0.988400933	0.99373308	0.984415755	0.996338536
15:33:33.696	1.002044108	1.004003208	0.978580777	0.980075111	0.975646119	0.975435537	0.977196997	0.977978977	0.977727253	0.9807757	0.981119277	0.982369779	0.983391406	0.983338688	0.98859648	0.993863603	0.984584148	0.996440373
15:33:34.560	1.00302558	1.002806846	0.978784709	0.980196585	0.975792756	0.975486311	0.977336616	0.978187785	0.977939849	0.980938206	0.981349635	0.982730826	0.983714041	0.983661515	0.988989858	0.994304901	0.985101021	0.996910616
15:33:35.424	1.001402507	1.002252271	0.978841186	0.980185486	0.975713501	0.975544416	0.977182857	0.977964434	0.977723988	0.980616954	0.981009955	0.982296103	0.98327363	0.983189456	0.988430738	0.993657417	0.984474979	0.996196534
15:33:36.288	1.002551904	1.0031358	0.978843634	0.980165508	0.975730311	0.975566342	0.977173111	0.977941142	0.977690517	0.980670722	0.980985068	0.982248842	0.983242215	0.983161111	0.988500601	0.993775074	0.984574012	0.996361882
15:33:37.152	1.002970385	1.001616649	0.978608937	0.979980606	0.975523765	0.975327247	0.97684178	0.977541873	0.977228517	0.980078319	0.980416059	0.9815876	0.982537091	0.982582568	0.987737341	0.993040058	0.983815642	0.995657931
15:33:38.016	1.002506244	1.001724366	0.978655389	0.98000834	0.975526505	0.975260646	0.976792905	0.977532933	0.977213072	0.980047507	0.98043748	0.981685249	0.982633556	0.982568246	0.987920499	0.993332169	0.984053735	0.996003682
15:33:38.880	1.003102037	1.001939441	0.978608315	0.979875979	0.975326549	0.975099869	0.976446088	0.977129798	0.976795717	0.979492113	0.979880542	0.98098935	0.981979661	0.981996285	0.987226531	0.992685417	0.983333159	0.995375544
15:33:40.608	1.002873861	1.004480261	0.978524823	0.979890216	0.975284434	0.975062921	0.976336323	0.977027996	0.976669568	0.97930773	0.979745758	0.980881168	0.981941369	0.981955501	0.987266609	0.992921137	0.983620352	0.995651336
15:33:41.472	1.002390806	1.003228209	0.978545787	0.979880207	0.975269961	0.975099626	0.976311407	0.976985275	0.976614009	0.979460009	0.979843755	0.981033323	0.982113057	0.982078075	0.987594466	0.993459695	0.984353721	0.996283464
15:33:42.336	1.00281754	1.002888326	0.97845602	0.979668741	0.975055206	0.974879893	0.975957657	0.976536981	0.976125051	0.978796863	0.979176986	0.980338416	0.981359213	0.981468312	0.986905804	0.992852636	0.983809363	0.995717253
15:33:43.200	1.001421393	1.000612084	0.978365514	0.979652601	0.974888228	0.974726893	0.975692108	0.976297281	0.975915023	0.978483741	0.978827166	0.980044248	0.981064407	0.981130069	0.986666103	0.992748941	0.983600239	0.99563873
15:33:44.064	1.002911225	1.002354031	0.978355299	0.979553256	0.974819044	0.974577064	0.975517533	0.976095626	0.97561776	0.978169901	0.978640553	0.979885778	0.9808589	0.98094691	0.986558778	0.992758867	0.983464809	0.995724916
15:33:44.928	1.003094369	1.003076416	0.978278379	0.979587154	0.974717465	0.974510899	0.975335283	0.97588296	0.975478842	0.978064755	0.978387514	0.979662089	0.980676826	0.980709226	0.986454306	0.992775499	0.983597013	0.995809122
15:33:45.792	1.002382438	1.001309625	0.978296345	0.979433054	0.974564333	0.974344485	0.975069549	0.975569879	0.975196279	0.977608532	0.977962767	0.979220307	0.980201524	0.980332657	0.986036824	0.992501912	0.98331568	0.995514843
15:33:47.520	1.001929503	1.000928634	0.978085924	0.979306978	0.974335475	0.97413765	0.974719763	0.97519935	0.974703275	0.977135902	0.977393273	0.978655727	0.979531217	0.979798131	0.985412522	0.991831966	0.982628882	0.994925792
15:33:48.384	1.002009838	1.002373682	0.977958891	0.979226828	0.974149181	0.97400901	0.974423284	0.974904229	0.974368445	0.976685987	0.976989	0.978265759	0.979151215	0.979313541	0.985001211	0.991469289	0.982273153	0.99459385
15:33:49.248	1.002040568	1.003569181	0.978004799	0.979232103	0.974132378	0.973945045	0.974357298	0.974817404	0.97431957	0.976724391	0.976919384	0.978237721	0.979133184	0.979285492	0.985069491	0.991670024	0.982462126	0.994816492
15:33:50.112	1.000509409	1.000956748	0.977897119	0.979181731	0.974080907	0.973873903	0.974219366	0.974622547	0.974113338	0.976505147	0.976669366	0.978001018	0.978839908	0.9790567	0.984871114	0.991497755	0.982351535	0.994685019
15:33:50.976	1.001557133	1.002052128	0.977862313	0.979086261	0.973992905	0.973735242	0.973968812	0.974360146	0.973849348	0.976126646	0.976270413	0.977627538	0.978451825	0.978687024	0.984452099	0.99111799	0.981973042	0.994307749
15:33:51.840	1.001943219	1.003766014	0.977866349	0.979089736	0.973911841	0.973690704	0.973958938	0.97432491	0.973782638	0.976014442	0.976262044	0.977607528	0.978502959	0.978677036	0.984495542	0.991268927	0.982156982	0.994496968
15:33:52.704	1.002522867	1.000894172	0.977837249	0.979087719	0.973832124	0.973616444	0.973793354	0.974149491	0.973599236	0.975900107	0.975976927	0.97731846	0.978184428	0.978410588	0.984196619	0.990945368	0.981819553	0.994223166
15:33:53.568	1.001096498	1.001250094	0.9778488	0.978894409	0.973700272	0.9734925	0.973556318	0.973909444	0.973313857	0.975430701	0.975590989	0.976918039	0.977815537	0.978010442	0.9838563	0.990654262	0.981446096	0.993927869
15:33:55.296	1.001741274	1.004431404	0.97774483	0.978890532	0.973654799	0.973459146	0.97342595	0.973722348	0.973101227	0.975265828	0.975446162	0.976726703	0.977600951	0.977723508	0.983696839	0.990571449	0.981275441	0.993889188
15:33:56.160	1.001225566	1.001397702	0.977780581	0.978891734	0.97363163	0.973383403	0.973315226	0.973612375	0.972951136	0.975141615	0.975262887	0.976653662	0.977511347	0.977569223	0.983615084	0.990604245	0.981327832	0.993934564
15:33:57.024	1.001190896	1.002052506	0.977751415	0.978862807	0.973521274	0.973340806	0.97324551	0.973488994	0.972826655	0.975085903	0.975144002	0.97646001	0.97740027	0.977592983	0.983596017	0.990651991	0.981472515	0.994038275
15:33:57.888	1.001578073	1.001230092	0.9777006	0.97883561	0.973472577	0.973214238	0.973105981	0.973362108	0.972721231	0.974864384	0.974960561	0.976367444	0.977277446	0.977393595	0.983533843	0.990724275	0.981527327	0.994128741
15:33:58.752	1.002128107	1.00223849	0.977615411	0.978818239	0.973390665	0.973118841	0.972918535	0.973149589	0.972514549	0.974616233	0.974708222	0.976117148	0.977018181	0.977214955	0.98336278	0.990667481	0.981430324	0.994081859
15:33:59.616	1.000329339	1.002257257	0.977485707	0.978602596	0.973159412	0.972963421	0.97253857	0.972742543	0.971974969	0.974190263	0.974089104	0.975453404	0.976382064	0.976565027	0.982689788	0.989958704	0.980819844	0.99341353
15:35:15.648	1.006181452	1.015671135	0.98072047	0.981804839	0.97610984	0.975764332	0.974794494	0.974671996	0.973831	0.975902969	0.975388778	0.976671924	0.977501961	0.977842734	0.98365278	0.990734849	0.982227364	0.993846648
15:35:16.512	1.003913696	1.002948929	0.980821961	0.981724174	0.976075487	0.975899722	0.974797438	0.974787332	0.973975622	0.975632288	0.97557669	0.976809291	0.977681412	0.977757402	0.983812823	0.99092146	0.982272072	0.994239196
15:35:17.376	1.003962053	1.003566256	0.980958287	0.981877193	0.976268405	0.976096134	0.974981586	0.974947542	0.974121645	0.975812063	0.975715233	0.976949438	0.977870616	0.977954912	0.984020948	0.991194978	0.982575901	0.994515091
15:35:18.240	1.003776093	1.005227305	0.98090282	0.981876485	0.976125094	0.975961312	0.974766764	0.974731223	0.973907654	0.975519479	0.975386651	0.976576551	0.97750034	0.977596903	0.983607271	0.990760601	0.982104935	0.99410319
15:35:19.968	1.004680805	1.002825424	0.981043139	0.981911818	0.976248123	0.976084522	0.974948202	0.974854686	0.974023832	0.975788716	0.975591216	0.976818869	0.977811322	0.9778508	0.984002808	0.991217513	0.982566692	0.994568729
15:35:20.832	1.003883141	1.005022543	0.981138471	0.98193686	0.976323857	0.976095756	0.974998514	0.974965009	0.974136639	0.975830323	0.97570192	0.977002769	0.977942835	0.977981704	0.984205248	0.991454798	0.982753657	0.994804438
15:35:21.696	1.003458435	1.005320615	0.981054835	0.981930373	0.976266476	0.97604764	0.974922576	0.974849219	0.97398007	0.975794159	0.975540041	0.976820638	0.977736102	0.977808207	0.984026227	0.991239352	0.982538453	0.994625603
15:35:22.560	1.004271951	1.003482395	0.981066282	0.982002019	0.976295893	0.976028949	0.974897269	0.974846148	0.973913757	0.975763793	0.975525156	0.97684578	0.977728493	0.977794586	0.984021263	0.99124335	0.98248017	0.994614761
15:35:23.424	1.004005767	1.003056217	0.98106599	0.982004058	0.976311493	0.976125741	0.97491464	0.97484284	0.97396944	0.975693146	0.975523293	0.97687412	0.977704914	0.977666848	0.983967965	0.991204784	0.982348844	0.994574275
15:35:24.288	1.004332729	1.005659804	0.981148629	0.982029649	0.976385497	0.976178228	0.974978578	0.974964695	0.974035653	0.976044349	0.975708523	0.976955151	0.977979032	0.977909613	0.984193354	0.991426132	0.98256242	0.994839136
15:35:25.152	1.003800614	1.003081909	0.981211322	0.982114205	0.976451935	0.976223583	0.975104785	0.974970533	0.974164347	0.975983748	0.975780375	0.977039128	0.978062379	0.977931426	0.984274711	0.991551039	0.982635941	0.994957219
15:35:26.880	1.004211441	1.004403271	0.981021328	0.982019357	0.976304826	0.976104586	0.974866995	0.974772969	0.973890406	0.975661496	0.975400898	0.976659903	0.9776365	0.977489395	0.983803063	0.990973673	0.981948859	0.99433339
15:35:27.744	1.004577243	1.003673479	0.981203854	0.982036031	0.97635059	0.97618466	0.974876649	0.974777909	0.973848423	0.975714907	0.975401226	0.976659082	0.977608286	0.977575291	0.983761283	0.990922202	0.981704592	0.994261936
15:35:28.608	1.004456288	1.002633577	0.981200034	0.982085153	0.976347326	0.976152596	0.97490424	0.974797148	0.973903188	0.975646474	0.975306271	0.976597449	0.97751053	0.977428926	0.983598835	0.990675908	0.981478661	0.993988365
15:35:29.472	1.004181528	1.003701645	0.981291347	0.982145504	0.976412722	0.976196528	0.974918072	0.974813613	0.973869054	0.9756605	0.975394849	0.976673348	0.977628065	0.977484426	0.983668792	0.990739573	0.981527952	0.994033725
15:35:30.336	1.003649561	1.004274447	0.981335229	0.982246896	0.976537828	0.976332347	0.975155624	0.975079364	0.974201234	0.975971926	0.975727547	0.977015359	0.978008373	0.977764449	0.984014276	0.991098268	0.981713372	0.994417592
15:35:31.200	1.004468403	1.005312647	0.981444451	0.98232945	0.976670678	0.976511385	0.975368058	0.975263735	0.97439948	0.976246904	0.976060061	0.977432343	0.978335137	0.97816533	0.984334413	0.991461914	0.98204831	0.994756454
15:35:32.064	1.004295702	1.003058974	0.981526872	0.982389804	0.976753883	0.976628826	0.975445587	0.975383257	0.974541037	0.976342779	0.976217978	0.977548152	0.978460028	0.978340109	0.984492393	0.991520613	0.982254625	0.994844472
15:35:32.928	1.004943569	1.003344715	0.981623229	0.982472406	0.976848806	0.976736715	0.975600051	0.975524048	0.974711	0.976427603	0.976348092	0.977695914	0.97855705	0.978487181	0.984609885	0.99161727	0.982361205	0.994860471
15:35:34.656	1.004181276	1.004898325	0.981642759	0.982502796	0.976942743	0.976764351	0.975681229	0.975600895	0.974725463	0.976421434	0.97638057	0.977643402	0.978540029	0.978504205	0.984466648	0.991352891	0.982089191	0.994542119
15:35:35.520	1.00462513	1.007750081	0.981611548	0.98262752	0.97695114	0.976790079	0.97579042	0.975674159	0.974828031	0.976594853	0.976417882	0.977659988	0.978565121	0.978651902	0.984485986	0.991292315	0.982078958	0.994453143
15:35:36.384	1.004949011	1.00440367	0.981809484	0.982765096	0.977220257	0.976960171	0.976083738	0.975978874	0.975159816	0.976966551	0.97677065	0.978081015	0.979062552	0.979158573	0.985075741	0.991860493	0.982743158	0.99508314
15:35:37.248	1.004282444	1.005501404	0.981923844	0.98284048	0.977285009	0.977079677	0.97613075	0.976086436	0.975182919	0.977096584	0.976859122	0.978189008	0.979150413	0.979266016	0.985149474	0.991942824	0.982811739	0.995153253
15:35:38.112	1.005275967	1.005741443	0.982064688	0.982927996	0.977440061	0.977260402	0.976418524	0.976368964	0.975513607	0.977549393	0.977357899	0.978647266	0.979622059	0.979726167	0.985720061	0.99254751	0.983382355	0.995781983
15:35:38.976	1.005505869	1.004881944	0.982064	0.982979718	0.977407015	0.977258006	0.976249533	0.976212183	0.975333688	0.977266608	0.977066057	0.978276587	0.979291798	0.979439011	0.985261393	0.991971272	0.982646398	0.995164422
15:35:39.840	1.005570542	1.004731982	0.982054108	0.983034607	0.977408545	0.977255328	0.976264144	0.976201788	0.975303616	0.977233369	0.977012147	0.978210315	0.979217737	0.97926213	0.985137591	0.991815256	0.98251477	0.995002714
15:35:40.704	1.004648129	1.005458031	0.982022441	0.983009672	0.977395255	0.977225842	0.976205307	0.976128121	0.975228908	0.977162535	0.976893821	0.978075087	0.979027088	0.979206185	0.984954708	0.991662703	0.982235504	0.994839803
15:35:42.432	1.005665775	1.004155716	0.982132611	0.983041895	0.977383105	0.977284859	0.976266609	0.976185011	0.97525113	0.977202532	0.976954267	0.978140217	0.979156827	0.97926196	0.985107745	0.99179223	0.982517149	0.995033907
15:35:43.296	1.004708988	1.004371044	0.982161964	0.983007543	0.977387809	0.97720601	0.976207752	0.976132787	0.975246888	0.977171702	0.976940538	0.978103645	0.97903851	0.979159778	0.985041603	0.991736679	0.982579294	0.994952571
15:35:44.160	1.00442908	1.004602013	0.982176536	0.983047091	0.977466915	0.977323919	0.9762925	0.976189116	0.975268851	0.977118204	0.977006647	0.978272097	0.979146733	0.979256179	0.985244933	0.9920073	0.98271782	0.995216773
15:35:45.024	1.003773436	1.004645467	0.982193402	0.983011924	0.977366315	0.977245264	0.976139988	0.976000313	0.975019433	0.977002358	0.976743047	0.977888981	0.978920181	0.978904736	0.984905183	0.991651264	0.982366726	0.994883084
15:35:45.888	1.004735579	1.004798939	0.98210139	0.983041023	0.977369072	0.977234648	0.97614238	0.975960603	0.974942598	0.976916766	0.9766558	0.977867092	0.97883004	0.978907097	0.98483169	0.99162863	0.982130955	0.994844391
15:35:46.752	1.004541218	1.004871612	0.982090054	0.983113856	0.977395451	0.977261351	0.97615919	0.975989123	0.975010009	0.976982653	0.976776771	0.978007605	0.978932853	0.978974343	0.985026139	0.991821558	0.982221172	0.995099159
15:35:47.616	1.00495021	1.002318278	0.982123021	0.983087686	0.977409748	0.977319865	0.97613519	0.975915386	0.97493536	0.976902127	0.976661386	0.977832794	0.978782705	0.978808008	0.98485659	0.991692338	0.981870739	0.99491214
15:35:49.344	1.005689212	1.006177136	0.982200769	0.983072517	0.977365378	0.977238571	0.976022083	0.975840341	0.974819569	0.976744355	0.976471291	0.977682531	0.978664569	0.978646192	0.984652345	0.991429148	0.981520432	0.99468237
15:35:50.208	1.005802927	1.003228966	0.982152936	0.983097802	0.977343028	0.977207233	0.975985808	0.975794563	0.974780663	0.976641487	0.976376632	0.97754438	0.978490056	0.978543395	0.984521033	0.991240797	0.981258383	0.994517294
15:35:51.072	1.005412113	1.002027582	0.98218786	0.983094331	0.977361438	0.977200895	0.975965395	0.975769673	0.974735469	0.976650189	0.976316965	0.977551196	0.978534804	0.978530724	0.984524696	0.991323966	0.981245893	0.994566827
15:35:51.936	1.004400309	1.008214436	0.982189835	0.983127076	0.977386856	0.977279656	0.976031867	0.975864359	0.974851693	0.976727843	0.976516279	0.977769529	0.978760771	0.978739161	0.984768197	0.991619168	0.981505117	0.994884252
15:35:52.800	1.005251791	1.004758362	0.982133716	0.983126198	0.977350096	0.977055585	0.975786619	0.975633413	0.974543753	0.976463307	0.976087442	0.977301204	0.978304182	0.978264405	0.984304554	0.991111425	0.980942949	0.994391406
15:35:53.664	1.004968967	1.006871407	0.982067679	0.983033877	0.977199039	0.977011128	0.975668182	0.975398432	0.974331771	0.976161822	0.975765654	0.97693677	0.977858991	0.97794934	0.983874491	0.990660902	0.980554595	0.993931608
15:35:54.528	1.004685231	1.005190349	0.98209696	0.982990679	0.977184647	0.977012623	0.975623055	0.975355525	0.974289897	0.976082208	0.975756276	0.976956512	0.977929314	0.977925401	0.983986888	0.990867354	0.980758481	0.994215708
15:35:55.392	1.004896948	1.004810096	0.982141043	0.982974015	0.977184516	0.977022912	0.975583086	0.975336756	0.974244103	0.976044286	0.975745613	0.976987794	0.978017471	0.978006774	0.984100121	0.991131799	0.980918924	0.9945001
15:35:57.120	1.005236888	1.007330456	0.981982172	0.982882349	0.976983126	0.976822659	0.975314756	0.974975627	0.973853745	0.975648488	0.975256042	0.976431421	0.977422918	0.977495798	0.98353399	0.990514373	0.980427337	0.993916847
15:35:57.984	1.003501569	1.005909648	0.982004308	0.982860107	0.976964044	0.976774086	0.975233429	0.974952806	0.973820868	0.97562522	0.975270134	0.976559463	0.977484598	0.977508517	0.983723085	0.99089436	0.980791159	0.994323985
15:35:58.848	1.005029121	1.005023181	0.981938548	0.982701565	0.976797345	0.976651333	0.974962773	0.974591101	0.973504715	0.975169135	0.97481274	0.976020346	0.977012161	0.97705935	0.983317975	0.990546616	0.980462204	0.994016517
15:35:59.712	1.004229335	1.005870272	0.981817406	0.982670353	0.976655771	0.97648052	0.974787355	0.97442686	0.973295255	0.975014026	0.974639092	0.975900274	0.976888984	0.976990277	0.983296052	0.990708741	0.980690823	0.994251018
15:37:14.880	1.000368944	0.996138575	0.980718199	0.981011903	0.973432934	0.973295526	0.96864574	0.967006235	0.965195899	0.965796612	0.964822319	0.966075062	0.967420285	0.967532066	0.974968891	0.985269985	0.974366144	0.989904448
15:37:15.744	1.003881187	1.003651259	0.980856145	0.98118465	0.973778035	0.973588872	0.9687973	0.96724973	0.965473167	0.966034583	0.965126859	0.966516626	0.967714071	0.967693156	0.97530116	0.985489127	0.974910178	0.99019967
15:37:17.472	1.003444249	1.004200384	0.98113816	0.981383108	0.974031175	0.973829699	0.969121054	0.967583469	0.96575583	0.96646206	0.965587154	0.966849718	0.968100313	0.968185632	0.975706284	0.985874383	0.975275585	0.990541159
15:37:18.336	1.004494034	1.005877177	0.981238466	0.981534044	0.974214414	0.97402399	0.969351803	0.967841536	0.966102972	0.966613977	0.965969823	0.96726585	0.968533083	0.96855132	0.976129218	0.986274044	0.975744927	0.990946634
15:37:19.200	1.00336748	1.003110953	0.981446969	0.98173083	0.974442249	0.974231017	0.969625894	0.968200129	0.966557211	0.967147598	0.966503443	0.967816224	0.969074178	0.969049616	0.976694912	0.986802942	0.976258235	0.991448246
15:37:20.064	1.003552857	1.00501547	0.981523377	0.981877878	0.974610047	0.974495206	0.969927094	0.968461846	0.966792321	0.967354354	0.966809848	0.968188345	0.969359272	0.96937222	0.977009668	0.98706248	0.976561241	0.99166625
15:37:20.928	1.004806831	1.003943567	0.981549217	0.981964295	0.974716785	0.974453927	0.969967825	0.968584505	0.966899053	0.967396115	0.966864646	0.968184953	0.969419639	0.969400191	0.97690288	0.986831862	0.976255965	0.991360918
15:37:21.792	1.003909265	1.002545024	0.981643529	0.981980773	0.974678329	0.974525906	0.969982806	0.968564088	0.966808346	0.967373231	0.966803311	0.968072314	0.969204989	0.969202709	0.976590032	0.986322499	0.975782967	0.990817672
15:37:22.656	1.003492759	1.003110811	0.981825838	0.98220132	0.975017509	0.974931664	0.970449545	0.969067203	0.967357004	0.967973022	0.96740462	0.968807893	0.969992855	0.96994691	0.977319244	0.987065978	0.976487868	0.991456222
15:37:23.520	1.004353097	1.004819851	0.98192564	0.98232326	0.975253955	0.975002295	0.97071847	0.969357712	0.967706037	0.968351764	0.967689096	0.96917108	0.970358385	0.97040588	0.977610062	0.98726633	0.976771176	0.991618717
15:37:25.248	1.004026928	1.005224939	0.98208379	0.982434862	0.97536631	0.975159366	0.970920709	0.969582222	0.967809604	0.968558377	0.967861142	0.969302229	0.970501633	0.970521412	0.977663959	0.987175964	0.976553529	0.991468977
15:37:26.112	1.00487847	1.003419314	0.982166174	0.98254114	0.97544864	0.975244256	0.971064814	0.969680507	0.968096052	0.968711136	0.968010818	0.969349215	0.970564764	0.970660301	0.9776003	0.986905104	0.976224472	0.991127207
15:37:26.976	1.003989275	1.002806955	0.982389466	0.982816859	0.975780098	0.975600591	0.971550753	0.970244617	0.968755947	0.969385812	0.968799629	0.970049957	0.971291629	0.971340114	0.978399535	0.987613724	0.976873024	0.991839245
15:37:27.840	1.004838467	1.004166576	0.982512312	0.982971026	0.976020489	0.975788723	0.971831066	0.970560915	0.969061102	0.969772137	0.969178984	0.970470505	0.971649492	0.971751624	0.978734604	0.987862249	0.977113369	0.992048879
15:37:28.704	1.003871475	1.005926184	0.982539923	0.983044436	0.976088393	0.975908088	0.97198115	0.9706988	0.969212458	0.969916532	0.969333335	0.970547248	0.971724173	0.971681547	0.978713386	0.98770444	0.976868365	0.991790424
15:37:29.568	1.004778685	1.005072588	0.982792683	0.983308927	0.976357401	0.976126153	0.97239274	0.971135184	0.969669581	0.970503281	0.969815584	0.971139415	0.972328332	0.972232334	0.979226191	0.988104567	0.977323874	0.992157615
15:37:30.432	1.003891495	1.004487017	0.982820927	0.983430598	0.976516179	0.976345006	0.972666742	0.971460107	0.970048471	0.970987101	0.970166573	0.971507549	0.972695775	0.972637149	0.979505952	0.988285666	0.977416635	0.992238602
15:37:31.296	1.005176934	1.003296584	0.983109147	0.983680277	0.976833008	0.976665143	0.97311925	0.971946887	0.970722896	0.971659454	0.970975013	0.972156484	0.973375979	0.973309739	0.98022275	0.988941985	0.978107864	0.99290295
15:37:33.024	1.004547557	1.003591438	0.983213262	0.983749695	0.977030648	0.976762216	0.973292274	0.972081675	0.97094722	0.971736448	0.971135916	0.972288899	0.973406036	0.973369266	0.980134333	0.98862128	0.977794323	0.992546803
15:37:33.888	1.005545332	1.003479415	0.983241296	0.983826761	0.977050843	0.97689067	0.973335671	0.972188912	0.97095295	0.971786406	0.971160431	0.972180424	0.973333669	0.973263212	0.979898928	0.988200782	0.977376291	0.992010087
15:37:34.752	1.005415525	1.007401365	0.983505485	0.984115389	0.977444736	0.977328603	0.973908417	0.972736771	0.971508514	0.972420499	0.971923388	0.972963659	0.97413661	0.974009964	0.980722637	0.988931957	0.978126054	0.992726554
15:37:35.616	1.005605043	1.004480978	0.983846255	0.98440416	0.977814029	0.977571468	0.974459871	0.973335468	0.972162328	0.973148779	0.972664989	0.973885131	0.97499777	0.974944882	0.981562317	0.989666461	0.978924961	0.993517101
15:37:36.480	1.004706136	1.006136565	0.983883257	0.98447282	0.977890902	0.977624614	0.974483235	0.973414976	0.972247243	0.973132115	0.972563953	0.97373702	0.974797042	0.974755122	0.981203312	0.989092489	0.978241827	0.99276045
15:37:37.344	1.00585181	1.005963785	0.983975375	0.984626188	0.978055169	0.977792606	0.974793176	0.973736028	0.972603353	0.973703615	0.972914484	0.974157164	0.975196189	0.975092157	0.981504142	0.989242906	0.978448462	0.992917282
15:37:38.208	1.006092443	1.00467999	0.984235142	0.984876366	0.978370747	0.978194623	0.975266271	0.974276901	0.973114859	0.974256685	0.973630891	0.974932618	0.975984597	0.975717927	0.982157947	0.989845444	0.979146789	0.993508344
15:37:39.936	1.006615929	1.006466709	0.984433481	0.985056758	0.978628816	0.978447089	0.97567635	0.974688878	0.973583625	0.97476646	0.974168344	0.975385781	0.976474777	0.97627264	0.982581206	0.990121396	0.979347232	0.993677129
15:37:40.800	1.006371691	1.006979262	0.984664751	0.985279108	0.978949003	0.97880294	0.976113984	0.975195697	0.974194294	0.975243137	0.974823196	0.976053528	0.977169684	0.976889603	0.983271686	0.990710988	0.979828046	0.994207821
15:37:41.664	1.00611305	1.007305611	0.984702648	0.985374361	0.979065148	0.978924	0.976304239	0.975371558	0.974352352	0.975357487	0.974939839	0.97612011	0.977203167	0.976966787	0.983203378	0.990454102	0.979582647	0.993885948
15:37:42.528	1.006452714	1.005923219	0.984938029	0.985510018	0.979293528	0.979179507	0.976627507	0.975719246	0.974653884	0.975772985	0.975252865	0.976534614	0.977621663	0.977482621	0.983539394	0.990632639	0.979662167	0.994019872
15:37:43.392	1.006505675	1.006747629	0.985018056	0.98578884	0.979547583	0.979362184	0.97692578	0.976095622	0.975025788	0.976234732	0.975793417	0.9770441	0.978104225	0.97802621	0.984002463	0.990972855	0.980017667	0.994321948
15:37:44.256	1.006754353	1.005294938	0.985201202	0.985919516	0.979742391	0.979648198	0.977323206	0.976497968	0.975333102	0.976711411	0.976343151	0.977511037	0.978526599	0.978577354	0.984482674	0.991347336	0.980440788	0.99465243
15:37:45.120	1.006607001	1.004951025	0.985275699	0.986023183	0.97985458	0.97970449	0.97737329	0.976609846	0.975432672	0.976747042	0.97642494	0.977541337	0.97854131	0.978523109	0.984351259	0.991018392	0.98016463	0.994276678
15:37:45.984	1.006594556	1.005944736	0.985540278	0.986190509	0.98014367	0.980020141	0.977720137	0.977002151	0.975850955	0.97719843	0.977077966	0.978032222	0.979124869	0.9789469	0.984878517	0.991501709	0.98064706	0.994755021
15:37:47.712	1.007014222	1.006432848	0.985625598	0.986341883	0.980270585	0.980184916	0.977968588	0.977239888	0.976189507	0.977455765	0.977380023	0.978297715	0.979450266	0.979331013	0.985117698	0.991662177	0.980855155	0.994855201
15:37:48.576	1.007345752	1.007579462	0.985679114	0.986460291	0.980415372	0.980298921	0.97818326	0.977468372	0.976443798	0.977711375	0.977668936	0.978614773	0.979722932	0.979552792	0.985354251	0.991815162	0.981022026	0.994958203
15:37:49.440	1.008066963	1.00732766	0.985824159	0.986588576	0.98056173	0.980437095	0.978357977	0.977695118	0.976742703	0.977993103	0.977873183	0.978938439	0.979923232	0.979748928	0.985582504	0.991959955	0.981123767	0.995034965
15:37:50.304	1.00652568	1.00984972	0.985929449	0.986727516	0.980726616	0.980629044	0.978644862	0.977950687	0.976954089	0.978243171	0.978056935	0.979250916	0.980172166	0.980006117	0.985771198	0.991972296	0.981189349	0.995064795
15:37:51.168	1.007562556	1.00421819	0.986120827	0.986887807	0.980949629	0.980769191	0.978878229	0.978275434	0.97736636	0.978733826	0.978453828	0.979628964	0.980506353	0.980502565	0.986058022	0.992189614	0.981495486	0.995196486
15:37:52.032	1.007475277	1.007722754	0.986256098	0.986988153	0.981134531	0.980962918	0.979079518	0.978483167	0.97751462	0.978814638	0.978636165	0.979737359	0.98057269	0.980557199	0.986060105	0.992048974	0.981429753	0.995012826
15:37:52.896	1.007810716	1.008357665	0.986388744	0.987226122	0.981455707	0.981277574	0.979518407	0.978981287	0.978047339	0.979438312	0.979376907	0.980504127	0.981360932	0.98137486	0.986790599	0.992771821	0.982139882	0.995697074
15:37:54.624	1.007854682	1.007755832	0.9865463	0.987423995	0.981626296	0.981469045	0.979789838	0.979278948	0.978295588	0.979787107	0.97972604	0.980763068	0.981567839	0.981520091	0.986966667	0.992725843	0.982146259	0.995594936
15:37:55.488	1.008779478	1.005209649	0.986724973	0.987567366	0.98188645	0.981721359	0.980134145	0.979654315	0.978716724	0.980231673	0.980106261	0.981185751	0.982106205	0.98194464	0.987368584	0.992993814	0.982398769	0.99585402
15:37:56.352	1.006824741	1.008688186	0.986816739	0.987650049	0.982011943	0.981855425	0.980259297	0.979778336	0.978841404	0.98038777	0.980176746	0.981190237	0.982068575	0.981944172	0.987200615	0.992650713	0.982101175	0.995430201
15:37:57.216	1.008051431	1.008786674	0.9870156	0.987830835	0.982264779	0.982101309	0.980654293	0.980261906	0.979295229	0.980916726	0.980696781	0.981844399	0.982751447	0.982585816	0.987823295	0.993220797	0.982505655	0.995961585
15:37:58.080	1.008585542	1.00840173	0.987161003	0.987960727	0.98244853	0.982265693	0.980858141	0.980459119	0.979552616	0.981032633	0.98086332	0.982019813	0.982847686	0.982711113	0.987804521	0.992994994	0.982202318	0.995698468
15:37:58.944	1.008585384	1.008471653	0.987362974	0.988112794	0.982667558	0.982514022	0.981206352	0.980817256	0.979923911	0.981567042	0.981333075	0.982464891	0.983255956	0.983244998	0.988224578	0.99336018	0.982613982	0.996000283
15:37:59.808	1.008737579	1.007285164	0.987420951	0.988182111	0.982758877	0.982594276	0.981239349	0.980944869	0.980098402	0.981625627	0.981502302	0.982535736	0.983330486	0.98336565	0.988174333	0.993170477	0.982372549	0.995750529
15:39:15.840	1.00899385	1.001870749	0.993195845	0.994288209	0.990522193	0.990240319	0.991224126	0.991634742	0.991829581	0.993878519	0.993976667	0.994738537	0.995407958	0.995174904	0.997696215	0.9991158	0.989913355	1.000012157
15:39:16.704	1.012834887	1.012259623	0.993440416	0.994402587	0.990645856	0.990470633	0.991529275	0.991993738	0.99199134	0.994308	0.994435815	0.995290357	0.995741484	0.995570716	0.99833274	0.999544107	0.990135334	1.000468169
15:39:17.568	1.013609621	1.01070121	0.993583643	0.9946259	0.990826083	0.990717509	0.991748434	0.992197717	0.992107737	0.994494604	0.994575617	0.995488545	0.995895729	0.99573943	0.998435652	0.999546767	0.990151913	1.000460247
15:39:18.432	1.01298044	1.01118433	0.993636723	0.994656814	0.990911952	0.990732225	0.991818571	0.992312867	0.992125565	0.994635032	0.99467175	0.995520115	0.995938694	0.995741161	0.998429041	0.999467909	0.990138724	1.000375189
15:39:19.296	1.013570133	1.0143279	0.993825998	0.994879602	0.991177668	0.990995589	0.992151516	0.992651114	0.992634544	0.995034316	0.995277892	0.996042266	0.99646616	0.996289864	0.998988064	1.000010835	0.990749293	1.000886345
15:39:20.160	1.013648646	1.014434557	0.993920168	0.994960185	0.99120348	0.991091506	0.992235119	0.99275279	0.99266361	0.995095165	0.995349238	0.996101408	0.996500905	0.996261173	0.998974596	0.999941442	0.990893859	1.000758475
15:39:21.024	1.013331639	1.014852027	0.993988604	0.994973603	0.991267354	0.9910962	0.992267168	0.992765341	0.992722392	0.995152562	0.99533927	0.995989689	0.996405819	0.996199197	0.998755749	0.999634029	0.990525964	1.00040051
15:39:22.752	1.013046828	1.012424621	0.994183309	0.995136418	0.991486411	0.991292158	0.99254496	0.993059151	0.993094994	0.995404857	0.995805062	0.996410772	0.996824052	0.996619186	0.999200656	1.000020299	0.990783057	1.000768884
15:39:23.616	1.012923539	1.015775715	0.9942248	0.995217575	0.991605565	0.991445011	0.992679301	0.993206526	0.99327577	0.995547724	0.995845695	0.996407809	0.996854792	0.996588691	0.99915614	0.999891728	0.990647739	1.00061907
15:39:24.480	1.013217346	1.013453214	0.994324146	0.995351028	0.991765208	0.991571077	0.992856696	0.993459216	0.993587203	0.995880832	0.996236566	0.996771724	0.997253471	0.996932674	0.999530542	1.000191821	0.991008542	1.000867727
15:39:25.344	1.013924656	1.013216398	0.994495584	0.99549279	0.991947596	0.991844603	0.993125641	0.993736056	0.993959645	0.996088958	0.996498953	0.997096442	0.997543344	0.997259265	0.999822998	1.000492774	0.99134621	1.001123352
15:39:26.208	1.014150951	1.015249955	0.994523244	0.995565162	0.992066828	0.991882866	0.993328143	0.993892019	0.994158711	0.996206254	0.996594598	0.997243742	0.997657052	0.997377381	0.999921281	1.000509858	0.99143241	1.001101113
15:39:27.072	1.013380747	1.012224305	0.994662758	0.9956276	0.992107815	0.99203737	0.993421167	0.993964265	0.994304827	0.996324971	0.996668006	0.997274671	0.997737735	0.997483463	0.999917617	1.0004384	0.99149878	1.000999375
15:39:27.936	1.013641824	1.013489574	0.994796438	0.995794562	0.992378867	0.992130515	0.993789723	0.994363228	0.994805849	0.996821665	0.997187772	0.997914329	0.998272025	0.998048054	1.000532731	1.001049682	0.992239644	1.001635667
15:39:28.800	1.01449054	1.014676258	0.994818189	0.995922514	0.992363616	0.992217647	0.993746912	0.994346232	0.994799952	0.996816619	0.997200051	0.997891804	0.998291554	0.998065605	1.000459407	1.000940822	0.992145784	1.001542631
15:39:30.528	1.013525729	1.015456116	0.994851107	0.995810072	0.99234352	0.992310731	0.9936856	0.994200997	0.994644233	0.996567538	0.99687658	0.997558796	0.997900948	0.997637399	0.999992656	1.000405179	0.991587182	1.00090816
15:39:31.392	1.013698699	1.013930344	0.994778559	0.99599646	0.992421604	0.992274558	0.993823902	0.994371213	0.994843709	0.996801194	0.997113776	0.997817169	0.998145314	0.997990023	1.000244548	1.000638143	0.991892883	1.001149459
15:39:32.256	1.01347045	1.014844991	0.994909811	0.996027339	0.992482145	0.992393257	0.993860582	0.994449925	0.994926799	0.996810397	0.997241924	0.997829589	0.998174001	0.998032874	1.00025138	1.000596125	0.991953929	1.001120247
15:39:33.120	1.013919401	1.013601355	0.995013222	0.996141054	0.992566749	0.992454229	0.994005979	0.994576549	0.994982178	0.996967752	0.99744682	0.998004042	0.998351236	0.998153459	1.000380487	1.000663046	0.992154415	1.001208002
15:39:33.984	1.014104075	1.014678028	0.994966059	0.996101118	0.992577102	0.992462516	0.993931359	0.994491751	0.994868543	0.996795036	0.997253493	0.997758915	0.998144555	0.998036777	1.000089806	1.000332431	0.991741291	1.000849946
15:39:34.848	1.013782553	1.016527504	0.995036793	0.996191611	0.992685869	0.992531489	0.994055249	0.994574852	0.995000705	0.996903004	0.997303193	0.997820761	0.998181877	0.998160814	1.000165619	1.000334588	0.99178094	1.000858565
15:39:35.712	1.014158433	1.015507457	0.995195847	0.996273428	0.992790259	0.992692096	0.994158167	0.994723557	0.994962262	0.997090897	0.997491103	0.998011652	0.998378093	0.99827727	1.000333176	1.000454091	0.991992032	1.000998018
15:39:37.440	1.014239374	1.013575571	0.99508592	0.996295671	0.992762482	0.992633132	0.994159514	0.994699666	0.994923828	0.997029395	0.997479658	0.997936221	0.998307297	0.998202348	1.000195976	1.000296491	0.991724778	1.000780618
15:39:38.304	1.014518875	1.014379876	0.995160174	0.996339714	0.992886698	0.992734484	0.994301429	0.994906573	0.995005568	0.997173509	0.997634156	0.998066632	0.998559005	0.998457554	1.000406206	1.000491108	0.991810299	1.001013507
15:39:39.168	1.014013579	1.015384712	0.995354837	0.996500742	0.993011129	0.99290556	0.994548432	0.995142645	0.995327853	0.997559794	0.997917624	0.998457477	0.998958523	0.998801645	1.000821036	1.000921468	0.992216035	1.001396535
15:39:40.032	1.014141663	1.013993773	0.995383203	0.996508448	0.993059121	0.992943596	0.994534014	0.995120536	0.995285826	0.99745223	0.997841034	0.998298362	0.998827626	0.998741685	1.000652972	1.000669769	0.991916925	1.001116095
15:39:40.896	1.013848556	1.014706309	0.99545612	0.996566523	0.993186936	0.993006244	0.99470354	0.995268475	0.995458747	0.997651744	0.998018952	0.998516029	0.999028822	0.998903104	1.000833697	1.000882406	0.992125404	1.001304499
15:39:41.760	1.01356427	1.015529594	0.995564892	0.996672236	0.993258198	0.993095141	0.994779188	0.995361609	0.995620022	0.997967438	0.998130987	0.998715421	0.999190207	0.99904668	1.001029816	1.001053636	0.992312769	1.001498715
15:39:42.624	1.014392101	1.013278113	0.99560988	0.996742763	0.993296069	0.993166102	0.994902	0.99550834	0.995824954	0.997962407	0.998274855	0.998922253	0.999353513	0.999167851	1.001220318	1.001312814	0.992464347	1.001734979
15:39:43.488	1.014488016	1.013338003	0.995495539	0.996675931	0.993272089	0.993090835	0.994827145	0.995389159	0.995651236	0.997770566	0.998166553	0.998785636	0.999217574	0.998945069	1.001085544	1.001213898	0.992253516	1.001643567
15:39:45.216	1.014147193	1.014678553	0.995522579	0.996642105	0.993189577	0.993041053	0.99470807	0.995237402	0.995538645	0.997635608	0.997965302	0.998535366	0.999014726	0.99880531	1.000883488	1.000990115	0.991999765	1.001406702
15:39:46.080	1.013760169	1.011373977	0.995385945	0.996465206	0.992959851	0.992900277	0.994401462	0.994850269	0.995079399	0.997124965	0.997408151	0.99791474	0.998428469	0.998186669	1.00024613	1.000294494	0.991309543	1.000756203
15:39:46.944	1.014635635	1.015476254	0.995393286	0.996470951	0.992957459	0.992834815	0.9943168	0.994820949	0.995047409	0.997146582	0.997397561	0.997926263	0.998460481	0.998243406	1.000298184	1.000478877	0.991476375	1.000949655
15:39:47.808	1.013644837	1.013084405	0.995265971	0.996454056	0.992895177	0.992850096	0.99428989	0.994791517	0.995007861	0.997136186	0.997383983	0.99801256	0.998498167	0.99821731	1.000475226	1.000736104	0.991728197	1.001278485
15:39:48.672	1.013621205	1.013997922	0.995167465	0.996338789	0.992703711	0.992581644	0.994005844	0.994442526	0.994605855	0.996782977	0.997017127	0.997519061	0.998055967	0.997833768	1.000019418	1.000382788	0.991332139	1.000927596
15:39:49.536	1.01404114	1.014921186	0.99506924	0.996183468	0.992543031	0.992396352	0.993671886	0.994069673	0.994233611	0.996341447	0.996571388	0.997014706	0.997567179	0.99744166	0.999570316	0.99996277	0.990873065	1.000533305
15:39:50.400	1.013981723	1.013097956	0.99507819	0.996142403	0.992433723	0.992370882	0.993583534	0.993980995	0.994228189	0.996220311	0.996466025	0.996980306	0.99753618	0.997425322	0.999629708	1.000134091	0.990968518	1.000733535
15:39:51.264	1.014455805	1.012559235	0.994911342	0.99599412	0.992277146	0.992126846	0.993230335	0.99359798	0.993722206	0.995675495	0.996001896	0.996435157	0.997010154	0.996852829	0.999079279	0.999595459	0.990412604	1.00024175
15:39:52.992	1.014391875	1.012927155	0.994812929	0.995927001	0.992131002	0.992015531	0.993070442	0.993388786	0.99353393	0.995361817	0.995810749	0.996179959	0.996780978	0.996679381	0.998951593	0.999554173	0.990499047	1.000280605
15:39:53.856	1.01455701	1.014090621	0.994834168	0.995923341	0.992090142	0.992021529	0.992919731	0.99331849	0.993422634	0.995437849	0.995721338	0.99618394	0.996806887	0.996640928	0.999027915	0.99976527	0.990705177	1.000492354
15:39:54.720	1.013557196	1.014508751	0.994677915	0.995789098	0.991913245	0.991835227	0.992729154	0.992993097	0.99307747	0.995092574	0.995370543	0.9958052	0.996390953	0.996219394	0.998652857	0.999487717	0.990336968	1.000228718
15:39:55.584	1.012901336	1.015192308	0.994738987	0.995747669	0.991852903	0.991744453	0.992584176	0.992833396	0.992925376	0.994839539	0.995171627	0.995638411	0.996238281	0.996020227	0.998514127	0.999358921	0.990225364	1.000136335
15:39:56.448	1.013586873	1.013888373	0.994646059	0.995638487	0.991731058	0.991588787	0.992393429	0.992643039	0.992686468	0.994596772	0.994873954	0.99534342	0.995929441	0.995747994	0.998254254	0.999116994	0.99011971	0.999935646
15:39:57.312	1.013798926	1.01277489	0.994598937	0.995639525	0.991661929	0.991594152	0.992245633	0.992494154	0.992499478	0.99437324	0.994696152	0.995138697	0.99566852	0.995546892	0.998013904	0.998936592	0.989876806	0.999747861
15:39:58.176	1.012839666	1.011926433	0.994505135	0.995499125	0.991575472	0.991453164	0.992075501	0.99228623	0.992354351	0.994101025	0.994406811	0.994863201	0.995368137	0.995308292	0.997730035	0.998647452	0.989697325	0.999468669
15:39:59.904	1.013768734	1.011870366	0.994486466	0.995554437	0.991511803	0.991406432	0.992048358	0.99226222	0.992340787	0.994141715	0.994372988	0.994858104	0.995439304	0.995270644	0.997830074	0.998813051	0.989907261	0.999680869
15:40:00.768	1.012648429	1.012556616	0.994422039	0.995605641	0.991504174	0.991404148	0.991939918	0.992173801	0.992209362	0.994043571	0.994349937	0.994752666	0.995357796	0.995254798	0.997757492	0.998794542	0.989803146	0.999708888
15:41:15.936	1.02040532	1.013817841	1.001609653	1.002951742	1.000645713	1.000403913	1.00337843	1.00446623	1.004881091	1.007710473	1.00746648	1.007609259	1.007470985	1.007130218	1.007457104	1.004412422	0.994375135	1.003543151
15:41:16.800	1.019388133	1.019448821	1.001877704	1.00316431	1.000949669	1.000816482	1.003987136	1.004909373	1.005600157	1.007954779	1.007962932	1.00810701	1.008122274	1.007743358	1.00802139	1.004998582	0.995119272	1.004257369
15:41:17.664	1.019166347	1.018762322	1.002153967	1.003403381	1.001169754	1.00106069	1.00421594	1.005182984	1.005841902	1.008214997	1.008219619	1.00832968	1.008306603	1.007917825	1.008054238	1.004847617	0.995110539	1.004090206
15:41:18.528	1.018586456	1.021907876	1.002240278	1.003572525	1.001337506	1.001225352	1.004455613	1.005439428	1.006066617	1.008462258	1.008577916	1.008582394	1.00865688	1.00823441	1.008360287	1.005139394	0.995573733	1.004368421
15:41:19.392	1.019854315	1.020389405	1.002419229	1.003644154	1.001460559	1.001383616	1.004590257	1.005605059	1.006200883	1.008644735	1.008699327	1.008695043	1.008849021	1.008440163	1.008486533	1.005266361	0.995583888	1.004467013
15:41:21.120	1.019759326	1.021231138	1.002398502	1.003734324	1.001527655	1.001369132	1.004667279	1.005669934	1.006217127	1.008757831	1.008743771	1.008669287	1.008822644	1.008457528	1.008436305	1.005153691	0.995510929	1.004350649
15:41:21.984	1.020038491	1.020165827	1.002500047	1.003830323	1.001679074	1.00155603	1.004856529	1.00585868	1.006250158	1.00885524	1.008923956	1.008851081	1.008983481	1.008668825	1.008602804	1.005301464	0.995652448	1.004474787
15:41:22.848	1.01979934	1.018465937	1.002579759	1.003879745	1.00174337	1.001623938	1.004962742	1.005959572	1.006319782	1.008989258	1.009064842	1.008904268	1.009024006	1.008826501	1.008610832	1.005308977	0.995565978	1.004451112
15:41:23.712	1.019497675	1.018876866	1.002690527	1.003968454	1.001831687	1.001747419	1.005082945	1.006073647	1.00646407	1.009083411	1.009208925	1.009078507	1.009217094	1.008895343	1.008845871	1.005517892	0.995783696	1.00464654
15:41:24.576	1.018772829	1.018812098	1.002586407	1.003897438	1.001766382	1.001729338	1.004935279	1.005920459	1.006382358	1.008856587	1.008934784	1.008808262	1.008878496	1.008673195	1.008492949	1.005187192	0.995525557	1.004282338
15:41:25.440	1.019529121	1.019486965	1.002615107	1.00394735	1.001766895	1.001627598	1.004880949	1.005803687	1.00622296	1.008727168	1.008808328	1.008626142	1.008722516	1.008434335	1.00829411	1.00498572	0.99543247	1.004110876
15:41:26.304	1.019728256	1.020238624	1.002631128	1.003911314	1.001745783	1.001615785	1.00483922	1.00573876	1.006162112	1.008659102	1.008710056	1.008511859	1.00863754	1.00836438	1.008228063	1.004900806	0.995286862	1.004030251
15:41:27.168	1.01931387	1.019755988	1.002676701	1.004004758	1.001810098	1.001700697	1.004856801	1.00579755	1.006241671	1.008755247	1.008817739	1.008638927	1.008712853	1.008531678	1.008388488	1.005118738	0.995504196	1.004260132
15:41:28.896	1.019546604	1.020545631	1.002729305	1.004023776	1.001778133	1.001677932	1.00489201	1.005811386	1.006335712	1.008731779	1.008823991	1.008732987	1.008807003	1.00851978	1.008510271	1.00530124	0.99561644	1.004448087
15:41:29.760	1.019458125	1.019186326	1.00267344	1.003975975	1.001781594	1.001625528	1.004734532	1.005650244	1.00612613	1.00857851	1.008633062	1.008449685	1.008523972	1.008245144	1.00820207	1.004941277	0.995367729	1.004128076
15:41:30.624	1.019127279	1.019123623	1.002634254	1.004028937	1.001781238	1.001705243	1.0047578	1.005693324	1.00613219	1.008528504	1.008583131	1.008505127	1.008550518	1.008355736	1.008259245	1.00500588	0.99532165	1.004183753
15:41:31.488	1.018767252	1.019584703	1.002824665	1.004067016	1.001818239	1.001738105	1.004799213	1.005732355	1.00614371	1.008620132	1.00859601	1.00861046	1.008667986	1.008420398	1.008412656	1.00519057	0.99544554	1.004332934
15:41:32.352	1.017742908	1.01905041	1.002743495	1.004024709	1.001801489	1.001613594	1.004751838	1.005702769	1.006171173	1.008588629	1.008466665	1.008459091	1.008483303	1.008341796	1.008195737	1.004951894	0.995183165	1.004098218
15:41:33.216	1.020105323	1.018126179	1.002787557	1.004155329	1.001875002	1.001774687	1.004881342	1.005838621	1.006331976	1.008654497	1.008566117	1.008589529	1.008644012	1.008436792	1.008293983	1.004980381	0.995179554	1.004128239
15:41:34.080	1.019986422	1.018410724	1.002781852	1.004209986	1.001938604	1.001892334	1.004921154	1.00589814	1.006300309	1.008645007	1.008525564	1.008531638	1.0085895	1.008307649	1.008143719	1.004756329	0.994889529	1.003860354
15:41:34.944	1.020358285	1.020419799	1.003121325	1.004412649	1.00226395	1.002206525	1.00537887	1.00635376	1.006897639	1.009173126	1.009222284	1.009183556	1.009191004	1.008845212	1.008811342	1.005444618	0.995693351	1.004482856
15:41:36.672	1.019697063	1.017569349	1.003233053	1.004639645	1.002494271	1.002357895	1.005660135	1.006706356	1.007309682	1.009604127	1.009723501	1.009603568	1.009610263	1.009336194	1.009282358	1.005818172	0.996209969	1.004864594
15:41:37.536	1.019827335	1.020299023	1.003333857	1.004724448	1.002665194	1.002606087	1.00598003	1.006965292	1.00751412	1.009899891	1.010067944	1.009902346	1.009922058	1.009556481	1.009539537	1.005973251	0.996444381	1.005020251
15:41:38.400	1.020183322	1.020653219	1.003538475	1.004929686	1.002803933	1.00276719	1.006121818	1.007187765	1.007870251	1.01005467	1.010313812	1.010126649	1.010147346	1.009933388	1.00970994	1.006120054	0.996614348	1.005126562
15:41:39.264	1.01967935	1.018898752	1.00365574	1.005040784	1.002963472	1.002917459	1.006404483	1.007460233	1.008083216	1.010436514	1.010641995	1.010404239	1.010429086	1.010116388	1.009963186	1.006304331	0.996861022	1.005291342
15:41:40.128	1.02036177	1.021447254	1.003795108	1.00530428	1.003301109	1.003254873	1.006829879	1.007925309	1.008486764	1.010945756	1.011256262	1.011142043	1.011116144	1.01075557	1.010629048	1.006979214	0.997562796	1.005934487
15:41:40.992	1.019677018	1.021525076	1.003923292	1.005341921	1.003347151	1.0032805	1.006899123	1.007979004	1.008472934	1.010878184	1.011124202	1.010980766	1.010954647	1.010615367	1.010347663	1.006557751	0.997152176	1.00548715
15:41:41.856	1.020416715	1.021862837	1.004112345	1.005557363	1.003700609	1.003598236	1.007245255	1.008437615	1.008924669	1.011452902	1.011704719	1.011674757	1.0116552	1.011307688	1.011040753	1.007233821	0.997912479	1.006188347
15:41:43.584	1.02090713	1.019357244	1.004111655	1.005584292	1.003711444	1.003575507	1.007335353	1.008429755	1.008843096	1.011451712	1.011591701	1.011497739	1.011480008	1.01101268	1.010717299	1.006781873	0.997425877	1.00564457
15:41:44.448	1.020464882	1.01836617	1.004268042	1.005667699	1.003783741	1.003756106	1.007397524	1.008544888	1.008925348	1.011557954	1.011605656	1.01153606	1.011457198	1.011143224	1.010620428	1.00655754	0.997274836	1.005383357
15:41:45.312	1.020518197	1.020802025	1.004306031	1.005744921	1.003875741	1.003727997	1.007477451	1.008655959	1.009126218	1.011598063	1.011685232	1.011525336	1.011468061	1.010988059	1.010528886	1.006337707	0.996952774	1.005116183
15:41:46.176	1.021458902	1.02062356	1.00450578	1.005858545	1.004100243	1.003999946	1.007772899	1.008977338	1.009472126	1.012023054	1.012101676	1.01197503	1.011884095	1.011471002	1.010942495	1.006819681	0.997353894	1.005561534
15:41:47.040	1.021127645	1.019557251	1.004587673	1.006072725	1.004310231	1.00421068	1.008075676	1.009300179	1.00980059	1.012360565	1.012545556	1.012418788	1.012275116	1.011883683	1.011364105	1.007179759	0.997671612	1.005917914
15:41:47.904	1.020701062	1.019944472	1.004638804	1.006161501	1.004391039	1.004331698	1.008146609	1.009362121	1.009868974	1.012470283	1.01262464	1.012453454	1.012223363	1.011892771	1.01131089	1.007092275	0.997616608	1.005780573
15:41:48.768	1.021024168	1.021020234	1.00481488	1.006306839	1.004541355	1.004419805	1.008321093	1.009591332	1.010186347	1.012728099	1.012903016	1.012797674	1.012542755	1.012189568	1.011654703	1.007375547	0.997899863	1.006062114
15:41:49.632	1.021383546	1.02209796	1.004735913	1.006276824	1.004481167	1.004485143	1.008292957	1.00953457	1.010180296	1.012596931	1.01280536	1.012668746	1.012450005	1.012124817	1.01151971	1.007196298	0.99787681	1.005876393
15:41:51.360	1.021330137	1.02070168	1.004800986	1.006326092	1.004624704	1.004524231	1.008460518	1.00963784	1.010315084	1.012810513	1.012944426	1.012778172	1.01260206	1.012209992	1.011655354	1.007313541	0.9979644	1.006020615
15:41:52.224	1.021715765	1.022336107	1.004948153	1.00656757	1.004810534	1.004755452	1.008760864	1.010020888	1.010681967	1.01324906	1.013437257	1.013243277	1.013190077	1.012751477	1.012287411	1.007980842	0.998801319	1.006682679
15:41:53.088	1.021482047	1.021311672	1.005007566	1.00654522	1.004900053	1.004781444	1.008795504	1.010052553	1.010833807	1.013300308	1.013482475	1.013280521	1.013260179	1.01277219	1.012351944	1.0080572	0.998938769	1.006749542
15:41:53.952	1.021817243	1.022571975	1.005005642	1.006650103	1.004944864	1.00484749	1.008816845	1.010100173	1.010830537	1.013336296	1.013444919	1.013280971	1.013241355	1.012722362	1.012287771	1.007972281	0.998943505	1.006653975
15:41:54.816	1.021418168	1.021144141	1.005092338	1.006636641	1.00498497	1.004884631	1.008887668	1.010136379	1.010829514	1.013413063	1.013412004	1.013283397	1.01317839	1.012782002	1.012243183	1.007875961	0.998891484	1.006532012
15:41:55.680	1.022093003	1.022074601	1.005275607	1.00670946	1.005207726	1.00502136	1.009061366	1.010403004	1.011101744	1.013726235	1.013679981	1.013578692	1.013524336	1.012934336	1.012551007	1.008185853	0.999245541	1.006812152
15:41:56.544	1.021889434	1.021490072	1.005336277	1.006791041	1.005233512	1.005043531	1.00917094	1.010428287	1.011143808	1.013871843	1.013657967	1.013542347	1.013381603	1.012859929	1.012389492	1.007898887	0.998930637	1.006519508
15:41:57.408	1.021626081	1.019993704	1.005334938	1.006886172	1.005343667	1.005258827	1.00926712	1.010548783	1.011241228	1.014043711	1.013789529	1.013603379	1.013493503	1.012920008	1.012403874	1.007780455	0.998950462	1.006378075
15:41:59.136	1.021930911	1.020109305	1.005509929	1.007075813	1.005500483	1.005409477	1.009496708	1.010799317	1.011426347	1.014404321	1.014034299	1.013828304	1.013750809	1.013210376	1.012562918	1.007917231	0.999110195	1.006419378
15:42:00.000	1.020563525	1.020827141	1.005522283	1.007101073	1.005523428	1.005358854	1.009450725	1.010783495	1.011367476	1.014273326	1.013934	1.013675287	1.013541757	1.013038874	1.012252449	1.007474319	0.998622291	1.005967492
15:43:15.168	1.025812416	1.015757174	1.009962405	1.011507096	1.010707582	1.010581636	1.01528065	1.016766622	1.017346194	1.020579558	1.019903841	1.019190836	1.019119271	1.01846468	1.016950163	1.011159859	1.00335478	1.008794749
15:43:16.896	1.024827261	1.025822701	1.00995861	1.011359362	1.010551861	1.010442679	1.015061442	1.016462061	1.016980717	1.019811437	1.019418953	1.018789633	1.018507997	1.018031506	1.016297467	1.010329746	1.002658329	1.008151337
15:43:17.760	1.024651681	1.0267728	1.010169309	1.011527777	1.010682768	1.010609341	1.015269186	1.01662133	1.017104469	1.019921365	1.019616346	1.019064517	1.018741414	1.018238773	1.016541595	1.010574925	1.00314151	1.008422921
15:43:18.624	1.024248116	1.026062316	1.010166648	1.011637202	1.010685823	1.010714546	1.015290572	1.016688424	1.017177053	1.020079853	1.019627001	1.019037133	1.018715117	1.018264242	1.016492508	1.010524417	1.003229132	1.008363214
15:43:19.488	1.02546087	1.027576215	1.010184128	1.011566355	1.010707192	1.010634381	1.01522234	1.016646214	1.017048672	1.019911804	1.01953614	1.018924223	1.018556703	1.018104229	1.016329464	1.010281566	1.00300588	1.008148021
15:43:20.352	1.02556027	1.024907369	1.010292287	1.011628122	1.010762013	1.010696907	1.015249199	1.016696819	1.017080827	1.019983091	1.019546862	1.018951587	1.018548848	1.018114542	1.016271015	1.010192763	1.002839661	1.008032827
15:43:21.216	1.025094545	1.026747766	1.010350724	1.011780833	1.010867919	1.010747563	1.015369888	1.016801223	1.01717235	1.020176919	1.019618764	1.019086432	1.018637158	1.018220745	1.016322281	1.010187532	1.002762793	1.008002681
15:43:22.080	1.02578806	1.025891128	1.010445232	1.011940185	1.01107316	1.010968153	1.015712903	1.017167291	1.017677169	1.020536564	1.020031298	1.019538075	1.019166852	1.018576152	1.016879435	1.010741386	1.0032992	1.008574895
15:43:22.944	1.025633925	1.024461468	1.01060698	1.012074908	1.011255143	1.011187673	1.015955238	1.017406265	1.017951046	1.020824584	1.020308727	1.019891101	1.019514505	1.018853195	1.017163101	1.010962954	1.003578824	1.008810081
15:43:24.672	1.025566613	1.027967544	1.010770103	1.012130016	1.011353391	1.011248584	1.016059274	1.017489879	1.017947491	1.020989472	1.020374599	1.019930279	1.019515856	1.018920094	1.017134478	1.010933232	1.003527401	1.008738687
15:43:25.536	1.025599462	1.026166151	1.010926006	1.012307647	1.011533154	1.011489195	1.016346559	1.017758628	1.018290865	1.021181708	1.020783233	1.020355914	1.01992628	1.019339857	1.01762699	1.011447577	1.003892301	1.009275411
15:43:26.400	1.025685476	1.02658179	1.010722912	1.012215568	1.011415674	1.011312113	1.016080265	1.017524893	1.018082688	1.020850858	1.020325976	1.019874694	1.019412148	1.018788782	1.016979333	1.010738485	1.003121284	1.008527682
15:43:27.264	1.025804893	1.024890302	1.010841156	1.0122415	1.011458913	1.011396293	1.016128375	1.017593803	1.018135842	1.020790553	1.020422999	1.019984545	1.019530962	1.018906881	1.017137269	1.010897483	1.003266842	1.008714089
15:43:28.128	1.025844723	1.024247958	1.010884969	1.012318657	1.011513541	1.011446755	1.016197073	1.017653362	1.018189031	1.020856277	1.020519884	1.020095519	1.019621249	1.018978139	1.017288752	1.011100752	1.003392459	1.008905113
15:43:28.992	1.026243982	1.025194421	1.010900286	1.012385941	1.011574207	1.011448871	1.016213099	1.017686353	1.018276148	1.020975668	1.020560964	1.020047747	1.019629782	1.019026402	1.017289228	1.011087617	1.003414867	1.008898054
15:43:29.856	1.025472846	1.027048796	1.010906254	1.012311689	1.011478966	1.011431917	1.016093892	1.017553561	1.01810551	1.020815793	1.020334698	1.019869538	1.019410649	1.01875138	1.017054025	1.010841508	1.00312238	1.008649324
15:43:30.720	1.024672001	1.023815446	1.010826379	1.012352566	1.011536569	1.011482008	1.016216693	1.017601501	1.018171949	1.020959214	1.020409477	1.019886351	1.019505409	1.018885269	1.017156527	1.010975128	1.00327507	1.008766589
15:43:32.448	1.024948288	1.025728496	1.011003171	1.012463778	1.011693949	1.011519746	1.016404481	1.017837712	1.01840112	1.021115155	1.020714642	1.020106435	1.019736394	1.01915674	1.017430829	1.011241869	1.003585518	1.00904756
15:43:33.312	1.025620516	1.024846389	1.01107398	1.012558324	1.011708466	1.011660615	1.016382871	1.017826451	1.01841787	1.021087596	1.020698706	1.020061032	1.019679771	1.019064701	1.017292575	1.011077899	1.003216486	1.008843153
15:43:34.176	1.026156677	1.025270101	1.011154785	1.012587047	1.01180447	1.011765791	1.016611467	1.018037971	1.018677414	1.02146783	1.020986418	1.020271865	1.019974366	1.019351146	1.017610389	1.011401556	1.003711483	1.00917091
15:43:35.040	1.025491943	1.027269392	1.01112823	1.012625779	1.011844766	1.011670638	1.016586487	1.017981526	1.018607384	1.021323696	1.020820038	1.020148116	1.019853776	1.019212822	1.017377824	1.011093861	1.003416862	1.008858174
15:43:35.904	1.025509102	1.026037217	1.011181018	1.012687549	1.011940351	1.011771503	1.016635216	1.018055806	1.018706499	1.02140411	1.020884318	1.020194749	1.019795117	1.019233584	1.017314957	1.010970694	1.003236314	1.008708573
15:43:36.768	1.025799812	1.024940245	1.011338055	1.01275083	1.012088226	1.011934053	1.016778044	1.018213771	1.018832161	1.021497308	1.021002128	1.020260926	1.019934234	1.019277218	1.017366519	1.010961291	1.003138636	1.008666523
15:43:37.632	1.026621803	1.026801962	1.011440417	1.012850115	1.012173958	1.012032042	1.016911055	1.018389066	1.018900876	1.021684344	1.02116347	1.020400788	1.020026522	1.019480818	1.017454737	1.010962222	1.00310534	1.008630554
15:43:39.360	1.026566709	1.02528724	1.011526789	1.012942862	1.012280386	1.012188255	1.017096935	1.018596261	1.019072421	1.021911652	1.021421979	1.020665155	1.020271853	1.019731831	1.017673058	1.011129021	1.003384209	1.008824707
15:43:40.224	1.026346976	1.026067562	1.01159035	1.013003357	1.012368527	1.012232027	1.017216869	1.018648328	1.019080308	1.021901697	1.021464146	1.020634596	1.020290504	1.019695471	1.017602409	1.010987252	1.003295947	1.008646709
15:43:41.088	1.026315031	1.024945147	1.011763683	1.013155444	1.012523854	1.012489186	1.017399148	1.018907715	1.019365408	1.022179486	1.021705187	1.020984748	1.020584961	1.020057503	1.017874079	1.011188028	1.003563411	1.008879416
15:43:41.952	1.02635392	1.026398619	1.011870645	1.013315313	1.012696346	1.012617512	1.01764643	1.019149676	1.01956531	1.022441285	1.021920364	1.021282186	1.020889877	1.020473127	1.018239687	1.011556199	1.003946382	1.009225348
15:43:42.816	1.02674978	1.025747284	1.0117741	1.013235986	1.012667095	1.01259363	1.017526556	1.019041092	1.019392957	1.022254695	1.021761253	1.021067904	1.020662093	1.020096866	1.017876265	1.011126868	1.003401967	1.008778198
15:43:43.680	1.026157549	1.025661171	1.011928627	1.013412718	1.012761345	1.012604338	1.01771937	1.019211213	1.01956314	1.022380559	1.021865288	1.021227475	1.02083735	1.020323972	1.018075278	1.011308887	1.003697733	1.008942213
15:43:44.544	1.026740984	1.02577873	1.011827916	1.01337538	1.012743184	1.012649136	1.017622566	1.019140602	1.019479949	1.022326692	1.021792996	1.021039111	1.020643891	1.020129424	1.01785083	1.011078721	1.003464828	1.00868013
15:43:45.408	1.026120872	1.02709557	1.012063185	1.013471075	1.012878825	1.012793072	1.017804983	1.019260197	1.019686656	1.022389463	1.021922133	1.021245454	1.020867871	1.020357152	1.018077817	1.011270883	1.003744011	1.008954734
15:43:47.136	1.026093623	1.02683386	1.01187354	1.013432386	1.012804172	1.012678202	1.017705449	1.019216427	1.019647281	1.022355246	1.021861955	1.021173432	1.020815038	1.020280342	1.018005397	1.011245057	1.00386014	1.008929147
15:43:48.000	1.026495358	1.027959837	1.011948914	1.0134176	1.012790244	1.012660529	1.017678234	1.019223044	1.019564597	1.022363429	1.021887056	1.021227576	1.020794433	1.020250913	1.018020902	1.011274405	1.003789557	1.008921311
15:43:48.864	1.026828306	1.026618737	1.01204743	1.01351892	1.012891407	1.012809133	1.017780788	1.019270475	1.019717932	1.022395885	1.022071639	1.021401122	1.020995225	1.020480509	1.018292369	1.011640964	1.004171699	1.009294713
15:43:49.728	1.025730724	1.026241871	1.012046052	1.013430311	1.012814254	1.012709205	1.01766425	1.019126739	1.019585873	1.02220882	1.021781509	1.021113989	1.020706267	1.020185948	1.017957171	1.011257452	1.0037245	1.008948843
15:43:50.592	1.026181699	1.026098841	1.012094417	1.01355449	1.012900526	1.012779955	1.017780823	1.019324312	1.019954315	1.022450677	1.022110062	1.021537609	1.021081941	1.020558052	1.018487214	1.011931927	1.004448895	1.00956456
15:43:51.456	1.026083076	1.027238972	1.011862181	1.013356803	1.012708453	1.012579843	1.017479623	1.018973691	1.019414575	1.02200946	1.021592324	1.020916072	1.020483966	1.019977383	1.017789	1.011162644	1.003755034	1.008867027
15:43:52.320	1.026558146	1.026030693	1.011992973	1.013485732	1.012823104	1.012770419	1.017583039	1.019120853	1.019517881	1.022192393	1.021787223	1.021139023	1.020764401	1.020216822	1.018120795	1.011608206	1.004182575	1.009242293
15:43:53.184	1.026046541	1.026612375	1.011895192	1.0133583	1.012690937	1.012648441	1.017435352	1.018898445	1.019349527	1.021939228	1.021529868	1.020925739	1.020458193	1.019913002	1.017846632	1.011316749	1.003984029	1.009065156
15:43:54.912	1.026374528	1.027080721	1.011780855	1.013268224	1.012536605	1.012419132	1.017091199	1.018581925	1.018975192	1.021487127	1.021015144	1.020370727	1.019953346	1.019449733	1.017268785	1.010719779	1.003430049	1.008459154
15:43:55.776	1.025285634	1.025000389	1.011812535	1.013252182	1.012506301	1.012455811	1.017095729	1.018587801	1.018993654	1.021545812	1.021043936	1.020395965	1.019976974	1.019520345	1.017349799	1.010882845	1.003609398	1.008606244
15:43:56.640	1.02649149	1.027958389	1.011844689	1.013263394	1.012566205	1.012467269	1.017218313	1.018659202	1.019146517	1.021638794	1.021209438	1.020622666	1.020132936	1.019675508	1.017615996	1.01122682	1.003954273	1.008963057
15:43:57.504	1.026811646	1.025925414	1.011935497	1.013345487	1.012532192	1.012416725	1.01712847	1.018543545	1.01896136	1.021517484	1.021089267	1.020530638	1.019995985	1.019446868	1.017462275	1.01109137	1.00391885	1.008838606
15:43:58.368	1.025901953	1.027242767	1.011880357	1.013310627	1.012558366	1.012495239	1.017086864	1.018515562	1.019043515	1.021446764	1.020981915	1.020344319	1.019927613	1.019342941	1.017386871	1.010988775	1.003857148	1.008779922
15:43:59.232	1.026370643	1.02548746	1.011836888	1.013245841	1.012394385	1.01232646	1.016906725	1.018257555	1.018666239	1.021103197	1.020603976	1.019904677	1.019445024	1.018895025	1.016870376	1.010484526	1.003419655	1.008248854
15:45:15.264	1.025926201	1.0336033	1.015694592	1.017137469	1.016995074	1.016983233	1.022224629	1.024016249	1.024098305	1.026882141	1.025738861	1.024672116	1.023984832	1.023418709	1.020414772	1.012480623	1.006571476	1.009521981
15:45:16.128	1.02924278	1.028842031	1.015713315	1.017348862	1.017301724	1.01721135	1.022597124	1.024243636	1.024338826	1.02696986	1.026172017	1.025186441	1.024531856	1.023875757	1.020889864	1.012933904	1.007020589	1.010093334
15:45:16.992	1.029361943	1.026862417	1.015833867	1.01750901	1.017505047	1.017373203	1.022851583	1.024526697	1.024636523	1.027159335	1.026485928	1.025484727	1.024840705	1.024181082	1.021151173	1.013171845	1.007386413	1.010300772
15:45:17.856	1.02894468	1.028419485	1.016071342	1.017512998	1.017507333	1.017630224	1.022871392	1.02448582	1.024628827	1.027104807	1.026369861	1.02539263	1.024707764	1.023971041	1.020959959	1.01292247	1.006989184	1.01002853
15:45:18.720	1.028989361	1.029556642	1.016076828	1.017723357	1.017717504	1.017700424	1.023169732	1.024877191	1.024993262	1.027538377	1.026969096	1.025951641	1.025306529	1.024591258	1.021628719	1.013565152	1.00775457	1.010794562
15:45:19.584	1.028383057	1.030744301	1.016089873	1.017724358	1.017711799	1.017666611	1.02310668	1.024875033	1.025020502	1.027416107	1.026925767	1.02589683	1.025235792	1.02462102	1.021601659	1.013528761	1.007733611	1.010741254
15:45:21.312	1.029332801	1.029049747	1.016162874	1.017702765	1.01774734	1.017671728	1.0231367	1.024849826	1.024936745	1.027469723	1.026862551	1.025807033	1.025125843	1.024405796	1.021420794	1.013309838	1.007575574	1.010497785
15:45:22.176	1.029663949	1.02947645	1.016193804	1.017758126	1.017759682	1.017716211	1.023155279	1.024887745	1.025038598	1.027481315	1.026966036	1.025906724	1.025216898	1.024520088	1.021597618	1.013497911	1.007690901	1.010686713
15:45:23.040	1.028801806	1.028306075	1.016221285	1.01774492	1.017767224	1.017723528	1.023136816	1.024879729	1.025032092	1.02749421	1.026906848	1.025860078	1.025183531	1.024473629	1.021491831	1.013388063	1.007574945	1.010584361
15:45:23.904	1.028745216	1.02864433	1.016166208	1.017779009	1.017759611	1.017712788	1.023145655	1.024857881	1.024921792	1.027340624	1.026841485	1.025700135	1.025067528	1.024313189	1.02139138	1.013259073	1.007459101	1.010449776
15:45:24.768	1.028917795	1.031164428	1.01620731	1.017860834	1.017902141	1.017762231	1.023298034	1.024979585	1.025148669	1.027620701	1.027041729	1.025962498	1.025291519	1.0245985	1.021636235	1.013568889	1.007716807	1.010734114
15:45:25.632	1.028892703	1.030174296	1.016348798	1.017909033	1.017998636	1.017979219	1.023433889	1.02515717	1.0252902	1.027699063	1.027281734	1.026233188	1.025523322	1.024833015	1.021891698	1.013829971	1.00795025	1.011039455
15:45:26.496	1.02890818	1.030317534	1.016444086	1.017987606	1.018036448	1.018054353	1.023508635	1.025255786	1.02540201	1.027810191	1.027349592	1.026343868	1.025637737	1.024875105	1.021964106	1.013890266	1.008001115	1.011078215
15:45:27.360	1.028186237	1.029037492	1.016435643	1.018022187	1.01808518	1.018091589	1.023534043	1.025279872	1.0255082	1.027953371	1.027330349	1.026323435	1.025633846	1.024918978	1.022006348	1.013956441	1.008084067	1.011079433
15:45:29.088	1.028974737	1.027956574	1.016440105	1.018018209	1.018080282	1.018012459	1.02343486	1.025200732	1.025360339	1.027757064	1.027159173	1.02611694	1.025419871	1.024695564	1.021728297	1.013623787	1.00782805	1.010806528
15:45:29.952	1.028996281	1.03034843	1.016439304	1.018009595	1.018075527	1.018021023	1.023434771	1.02514602	1.025313899	1.027729458	1.027105098	1.026031662	1.025331532	1.024580898	1.021631013	1.013531581	1.007752697	1.010686141
15:45:30.816	1.028594131	1.028970597	1.01637194	1.017950837	1.018011903	1.017982967	1.023298298	1.024972603	1.025175414	1.027442456	1.026870267	1.025747943	1.025047773	1.024272333	1.021296507	1.01313505	1.007322039	1.01028457
15:45:31.680	1.028583565	1.028579628	1.016466642	1.018047288	1.018135854	1.018076445	1.023499474	1.025175905	1.025300669	1.027756061	1.027045976	1.026107292	1.025383927	1.024649572	1.021667598	1.013539369	1.007800128	1.010702556
15:45:32.544	1.029294624	1.027554375	1.016449815	1.018013516	1.018034102	1.017983009	1.023362464	1.025025012	1.025132749	1.027474856	1.026790065	1.025789417	1.025018844	1.024298778	1.021253316	1.01306118	1.007236378	1.010247678
15:45:33.408	1.029425274	1.030653689	1.016560492	1.018009448	1.018070666	1.018087021	1.023455355	1.025047325	1.025112114	1.027633264	1.026745989	1.025727707	1.025001124	1.024290356	1.021196056	1.01296335	1.007114463	1.010118619
15:45:34.272	1.028875543	1.031228929	1.016463121	1.018084398	1.018086085	1.018061857	1.023343262	1.025013644	1.025113203	1.027433609	1.026669523	1.025596176	1.02486621	1.024174006	1.021062437	1.012861618	1.006960482	1.009978532
15:45:35.136	1.029749944	1.027656794	1.016609001	1.018156506	1.018142076	1.018147182	1.023471194	1.025141529	1.025106232	1.027590972	1.026817359	1.025733867	1.02507534	1.024413847	1.021276509	1.013091953	1.007151827	1.010215818
15:45:36.864	1.029225036	1.027613166	1.016640996	1.018221145	1.018210059	1.018200552	1.023568988	1.025274029	1.025240692	1.027765139	1.026986007	1.025882468	1.025198758	1.024521319	1.021418274	1.013227058	1.007175662	1.010327067
15:45:37.728	1.029907441	1.029290847	1.016734401	1.018252376	1.018314589	1.018312215	1.023737674	1.025433831	1.025418537	1.027920403	1.027171054	1.025982097	1.025396234	1.024711231	1.021610509	1.013396439	1.007403155	1.010486228
15:45:38.592	1.029314947	1.027947329	1.016850245	1.018267128	1.018379164	1.018346704	1.023775236	1.025468908	1.025456162	1.027958676	1.027193618	1.026024777	1.025336541	1.024722546	1.021552149	1.013349691	1.007246526	1.010386958
15:45:39.456	1.029235155	1.030437744	1.016954948	1.018447636	1.018577475	1.018515273	1.023935639	1.025676463	1.025661206	1.028174815	1.027415445	1.02625741	1.025589797	1.025071832	1.021832621	1.013590928	1.00752529	1.010647599
15:45:40.320	1.029119521	1.03166124	1.017023342	1.018551085	1.018706468	1.018668278	1.024126132	1.025880378	1.02586075	1.028410334	1.027688701	1.02662132	1.025880536	1.025371393	1.022133783	1.013852241	1.007985921	1.010945801
15:45:41.184	1.029561732	1.030013569	1.017084877	1.018631699	1.018780395	1.018709155	1.02423988	1.025988576	1.025995154	1.028454633	1.027763597	1.026655316	1.025964676	1.025442267	1.022114942	1.013811742	1.008091254	1.01085144
15:45:42.048	1.029604068	1.029861455	1.017227298	1.018715107	1.018973276	1.018930596	1.02446048	1.026206189	1.026204347	1.028630925	1.027982918	1.026925189	1.026233592	1.02563003	1.022356249	1.014015921	1.008326407	1.011056522
15:45:43.776	1.029855899	1.031956355	1.017273525	1.01885524	1.019030347	1.018930567	1.024453729	1.026218713	1.026224787	1.028698921	1.028030852	1.026889692	1.026195914	1.02556429	1.022278616	1.013877146	1.008327555	1.010895698
15:45:44.640	1.029977372	1.028638996	1.017261761	1.018816563	1.018994968	1.018894832	1.024472385	1.026204543	1.026235457	1.028613538	1.027942537	1.026788608	1.02605985	1.025476876	1.022101136	1.013639012	1.00824488	1.010628048
15:45:45.504	1.03026214	1.029620335	1.017204551	1.018798341	1.019019109	1.018900049	1.02445874	1.026133796	1.026157365	1.028431176	1.027794669	1.026618327	1.025893645	1.025260518	1.021825017	1.013341	1.008007851	1.010307988
15:45:46.368	1.030243825	1.031053592	1.017415324	1.01894906	1.019141713	1.019057494	1.024659432	1.026393302	1.026411777	1.028712565	1.028092824	1.026974072	1.026166153	1.025537272	1.022208018	1.013645295	1.008527052	1.01066462
15:45:47.232	1.030317555	1.029422179	1.017581186	1.019105412	1.019360578	1.019333996	1.024948332	1.026755534	1.026937698	1.02918166	1.028560304	1.027411295	1.026673927	1.026004973	1.02264373	1.014111162	1.009071315	1.011178122
15:45:48.096	1.02966431	1.029262456	1.017736267	1.019303979	1.019558897	1.019450523	1.025210732	1.026982128	1.027291776	1.029509313	1.028774897	1.027669196	1.02696718	1.026334938	1.022905493	1.014309868	1.009216718	1.011372585
15:45:48.960	1.029174717	1.029697816	1.017652816	1.019328101	1.019516297	1.019468796	1.025141345	1.026949827	1.027226098	1.029473864	1.028697431	1.02766469	1.026891568	1.026231248	1.022860454	1.014309881	1.009135113	1.011374653
15:45:49.824	1.029738496	1.028884879	1.017721623	1.019256549	1.019500064	1.019386189	1.02507352	1.026821838	1.02710364	1.029231651	1.028536053	1.027390923	1.026602368	1.025940821	1.022546846	1.013950344	1.008687575	1.010957524
15:45:51.552	1.031278571	1.030574254	1.017742359	1.019292417	1.019527356	1.01946796	1.025154283	1.02685766	1.027212264	1.029246437	1.028522063	1.027336577	1.026591614	1.025945549	1.022456285	1.013812845	1.008618435	1.010836294
15:45:52.416	1.030931338	1.028335243	1.01785726	1.01942694	1.01970904	1.019630567	1.025398874	1.027149343	1.027527849	1.029578785	1.028836089	1.027773052	1.026992242	1.026324302	1.022906527	1.014312332	1.009026129	1.011298004
15:45:53.280	1.030035153	1.031347721	1.017746375	1.019282662	1.019538529	1.01946964	1.025068154	1.026792682	1.027066307	1.029134177	1.0282893	1.027175848	1.026352434	1.025658682	1.022153635	1.013466982	1.008323912	1.010459149
15:45:54.144	1.029688482	1.031315382	1.017855959	1.019333483	1.019586294	1.019461052	1.025106296	1.026844664	1.027137118	1.029240983	1.028335782	1.027240297	1.026403892	1.025771748	1.022193595	1.01350353	1.00832832	1.010518687
15:45:55.008	1.029729618	1.028816585	1.01786613	1.019385097	1.019670006	1.019601479	1.025221844	1.026990366	1.027334431	1.029327361	1.028581229	1.027401898	1.026598151	1.0260004	1.022406445	1.01373257	1.008556096	1.010732078
15:45:55.872	1.030174822	1.030530207	1.01800163	1.019490289	1.019802204	1.019715786	1.025431235	1.027175999	1.027506455	1.0296113	1.028780461	1.027634586	1.02684299	1.026155954	1.022675156	1.014029838	1.008730493	1.011005486
15:45:56.736	1.029577565	1.030221954	1.017875094	1.019402527	1.019687486	1.019633863	1.025273608	1.027003343	1.027294865	1.029393295	1.0284521	1.027298494	1.026451271	1.025820339	1.022245967	1.01350834	1.008367665	1.010480374
15:45:57.600	1.030028577	1.031225741	1.017978994	1.019513308	1.019744339	1.019604203	1.025305108	1.027049022	1.027293548	1.029382679	1.028415968	1.027267608	1.026474563	1.025783967	1.022153599	1.013408133	1.008278944	1.010331535
15:45:59.328	1.030285333	1.02955941	1.018056695	1.019594411	1.01987286	1.019819878	1.0254704	1.027215856	1.027450056	1.029490567	1.028653221	1.027422065	1.026641551	1.025997713	1.022344664	1.013588247	1.008587705	1.010506401
15:46:00.192	1.029748716	1.032051959	1.018269497	1.019811116	1.020166591	1.020103082	1.025896309	1.027685481	1.027852513	1.030055642	1.029359435	1.028083191	1.027256978	1.026621044	1.023042115	1.01432462	1.009371238	1.011198208
15:47:15.360	1.031229134	1.035213458	1.021999929	1.023796588	1.024893939	1.024655616	1.031321283	1.033396119	1.033393693	1.035950651	1.035000533	1.033102848	1.032145035	1.031509632	1.026426521	1.015835133	1.011496952	1.012107793
15:47:17.088	1.032757071	1.033232069	1.022203679	1.023998949	1.025228636	1.025146967	1.031980242	1.034046265	1.034057901	1.036546222	1.035530996	1.033923199	1.032873547	1.032223568	1.027436933	1.016937668	1.012665418	1.013195647
15:47:17.952	1.032857417	1.034172321	1.022489057	1.024213788	1.025534565	1.02543985	1.032347398	1.034457577	1.034435215	1.036980154	1.036077222	1.034501148	1.033472465	1.032851733	1.028068351	1.017595259	1.013298345	1.01385522
15:47:18.816	1.033018513	1.034908515	1.022231659	1.024046086	1.025301162	1.025226305	1.031964361	1.03403781	1.033937938	1.036479541	1.035459923	1.033811377	1.032775339	1.032146863	1.027333779	1.016769292	1.012515314	1.013019052
15:47:19.680	1.032883126	1.035323208	1.022246217	1.024010503	1.025210625	1.025131444	1.031851937	1.033925338	1.033897821	1.036287592	1.035333347	1.033665423	1.032630421	1.031981368	1.027172091	1.016568269	1.012376247	1.012854654
15:47:20.544	1.032603982	1.033930567	1.022179062	1.023887734	1.02510111	1.025006843	1.031709854	1.033752888	1.033673581	1.036135406	1.035030962	1.033406298	1.03238466	1.031714167	1.026875598	1.016320874	1.012060954	1.012575535
15:47:21.408	1.033427805	1.035062954	1.022127958	1.023810497	1.024949213	1.024866322	1.031463575	1.033451664	1.033385612	1.035760554	1.034655581	1.032967971	1.031915212	1.031330664	1.026439648	1.015867539	1.011585607	1.01209655
15:47:22.272	1.033450274	1.033667914	1.022267117	1.024034653	1.025216237	1.025083569	1.031891586	1.03389186	1.033808399	1.036313005	1.035353808	1.033748587	1.032710669	1.032080076	1.027305735	1.016833357	1.012557734	1.013105259
15:47:23.136	1.033405485	1.034438174	1.022439475	1.024096017	1.025249605	1.025188307	1.031941572	1.034005246	1.033924144	1.036482826	1.035555884	1.03392467	1.032878807	1.032291123	1.02748971	1.017036211	1.012862807	1.013336085
15:47:24.864	1.033184049	1.033384797	1.022300361	1.024013531	1.02522453	1.025134937	1.031782407	1.033848557	1.033737415	1.036278277	1.035314916	1.033647098	1.032628811	1.032110496	1.02719632	1.016741608	1.012689565	1.013041964
15:47:25.728	1.032838964	1.033448429	1.022188244	1.023869214	1.02505214	1.024990514	1.03162542	1.033595119	1.033478742	1.036052822	1.034947788	1.033286572	1.032208508	1.031577757	1.026775654	1.016257841	1.012275794	1.012546548
15:47:26.592	1.033155254	1.032640971	1.022214051	1.023829893	1.024957351	1.024859885	1.031499839	1.033479102	1.033279462	1.03580027	1.034652372	1.032952709	1.031840953	1.031237474	1.02632671	1.015720491	1.011820324	1.011964568
15:47:27.456	1.032399293	1.03400899	1.022285207	1.024012618	1.025192807	1.025135724	1.031783324	1.033798127	1.03360252	1.036035068	1.035117039	1.033414421	1.032361976	1.031761701	1.026819722	1.016255284	1.012317151	1.012501328
15:47:28.320	1.033324653	1.035646138	1.02230924	1.023963527	1.025131075	1.025059607	1.031709257	1.033690006	1.033459715	1.036034556	1.034912986	1.033172739	1.032099187	1.031403111	1.026481257	1.015813938	1.011889783	1.012032433
15:47:29.184	1.03286921	1.033100978	1.022496506	1.024182261	1.025382593	1.025320731	1.032024437	1.034052515	1.033837684	1.036482298	1.035443411	1.033661032	1.032606959	1.032085323	1.027042622	1.016406708	1.012541713	1.012662892
15:47:30.048	1.03345179	1.03220468	1.022677838	1.024266022	1.025527592	1.025523432	1.032235733	1.03421392	1.034044659	1.036633605	1.035560543	1.03385711	1.03277653	1.032177192	1.027218214	1.016574102	1.012697479	1.012818056
15:47:31.776	1.03314002	1.035168945	1.022625804	1.024326345	1.025582258	1.025509874	1.032300391	1.034329264	1.034144231	1.036773561	1.035679203	1.033999235	1.032922709	1.032282167	1.027340706	1.016641779	1.012803294	1.012899894
15:47:32.640	1.033276716	1.033887	1.02277717	1.024521279	1.025776389	1.025714218	1.032504377	1.034586685	1.034450153	1.037006822	1.035908782	1.034305515	1.03318731	1.032674526	1.02766927	1.016971152	1.013161161	1.013192267
15:47:33.504	1.033464957	1.035108648	1.022731149	1.024441894	1.025704642	1.025615345	1.03240419	1.034464691	1.034359007	1.036796708	1.035666942	1.033976596	1.032881103	1.032367768	1.027280112	1.016543953	1.012714619	1.012731629
15:47:34.368	1.033155372	1.034392747	1.022726091	1.024411443	1.025712813	1.025601642	1.032424601	1.034438001	1.034339179	1.036778199	1.035616691	1.0339768	1.032865499	1.032352662	1.027182063	1.016415706	1.012639667	1.012625212
15:47:35.232	1.033726558	1.036393031	1.022705501	1.024473625	1.025783547	1.025692344	1.032472389	1.034521638	1.034382147	1.036908069	1.035715036	1.034086054	1.032931304	1.032390039	1.027300353	1.016527148	1.012844703	1.012706535
15:47:36.096	1.033641645	1.032756393	1.022892232	1.024515295	1.025848996	1.025771122	1.032571651	1.034612242	1.0344781	1.036958058	1.035750192	1.03412104	1.033010672	1.032462999	1.027347884	1.016495499	1.012862667	1.012676934
15:47:36.960	1.033867983	1.034615039	1.022927507	1.024597439	1.025977101	1.025882601	1.032684767	1.034794093	1.03476184	1.037240225	1.035968434	1.034393602	1.033204705	1.032673371	1.027521093	1.016641501	1.01309345	1.012778184
15:47:37.824	1.034265947	1.033592884	1.023197102	1.024994007	1.026446273	1.026364728	1.033441013	1.035543572	1.035815146	1.038374879	1.037135367	1.035590211	1.034390462	1.033765167	1.028719862	1.017901271	1.014315773	1.013977746
15:47:39.552	1.03299355	1.033536004	1.023186506	1.024978378	1.026283039	1.026217831	1.033254295	1.035313325	1.035524872	1.037921015	1.036696371	1.035143258	1.033920425	1.033292758	1.028112709	1.017182642	1.013406037	1.013247036
15:47:40.416	1.033816679	1.034627233	1.023342629	1.025017323	1.026446666	1.026355334	1.033420318	1.035514103	1.035772551	1.038333302	1.036946538	1.035333708	1.034082543	1.033500032	1.028291957	1.017363729	1.013665923	1.013377929
15:47:41.280	1.034320837	1.034674978	1.023418329	1.025077486	1.026536843	1.026416768	1.033519696	1.03565782	1.035973744	1.038510724	1.037123894	1.035539976	1.034294196	1.03369244	1.028471448	1.01753568	1.013818555	1.013527287
15:47:42.144	1.033872712	1.037230098	1.023489137	1.025143822	1.026579527	1.026500114	1.033620465	1.035752302	1.036177771	1.038687062	1.037261724	1.035587428	1.034368837	1.03381139	1.028510881	1.017535527	1.013843522	1.013506621
15:47:43.008	1.032812106	1.03404232	1.02345835	1.025145447	1.026651476	1.026531683	1.033606016	1.035721463	1.036082389	1.038579318	1.037172717	1.035521462	1.034306856	1.033635379	1.028398693	1.017372118	1.013729119	1.013326111
15:47:43.872	1.034228376	1.035369175	1.023528836	1.025224768	1.026769386	1.026652035	1.033713255	1.035899964	1.03626413	1.038827327	1.037360873	1.03573284	1.034555714	1.033825774	1.02864757	1.017651613	1.014082014	1.013631609
15:47:44.736	1.033889952	1.034385525	1.023440486	1.025177398	1.026633077	1.026490961	1.033508304	1.035642815	1.036044322	1.03855555	1.037080782	1.035329127	1.034175698	1.033451276	1.028203056	1.017144495	1.013482736	1.013063444
15:47:45.600	1.03363676	1.03542352	1.023420048	1.025152337	1.026697226	1.026515106	1.033614578	1.035679113	1.036000735	1.038638238	1.037158306	1.035441823	1.03425047	1.033545436	1.028283821	1.017252734	1.013588399	1.013182887
15:47:47.328	1.034612659	1.034653693	1.023418941	1.025118301	1.026532525	1.026410876	1.033410878	1.035449591	1.035764295	1.038245713	1.036746241	1.035047494	1.033805486	1.03320689	1.027790321	1.01665497	1.012861297	1.012589408
15:47:48.192	1.034338819	1.035775997	1.023457424	1.025129166	1.026631625	1.026560108	1.033551653	1.035576088	1.03594217	1.038453731	1.036971129	1.035162016	1.034034482	1.03335092	1.027979307	1.016835763	1.012998897	1.012758055
15:47:49.056	1.034394673	1.034167812	1.023507448	1.025173629	1.026576901	1.026531566	1.033528854	1.035564264	1.035889194	1.038444613	1.036856375	1.035080964	1.033916083	1.033272753	1.027847168	1.016666812	1.012772954	1.012553536
15:47:49.920	1.033909686	1.035334467	1.023568537	1.025293323	1.026744915	1.026639831	1.033685478	1.035759183	1.036051655	1.03852895	1.037103385	1.035324903	1.034137819	1.033529202	1.028113004	1.016908886	1.013091355	1.012772333
15:47:50.784	1.033436922	1.036304359	1.023835477	1.025473339	1.027008558	1.026884436	1.034094956	1.036175106	1.036418359	1.03899071	1.037566864	1.035763133	1.03468946	1.034068081	1.028640637	1.017350459	1.013426163	1.013258803
15:47:51.648	1.033635002	1.034335288	1.023985479	1.025706243	1.027276674	1.027162504	1.034461991	1.036569347	1.036898036	1.039437445	1.03804294	1.036332056	1.035257025	1.034757095	1.02920352	1.017874567	1.013899703	1.013795065
15:47:52.512	1.034199731	1.036169459	1.023984353	1.025757295	1.02737865	1.027236709	1.034558159	1.03671647	1.03703856	1.039538384	1.038222726	1.036426779	1.035368463	1.034849735	1.029251484	1.017867684	1.013923061	1.013780706
15:47:54.240	1.034592796	1.035965091	1.024086206	1.025784807	1.027392113	1.027336291	1.034625872	1.036742241	1.037023756	1.039523918	1.038147313	1.036356868	1.035248384	1.034696034	1.029076088	1.01759715	1.013601061	1.013482913
15:47:55.104	1.034319477	1.035099155	1.024104329	1.025884735	1.027474358	1.027377025	1.034791322	1.036849665	1.037204624	1.039669592	1.038283961	1.036487745	1.035318418	1.034770161	1.029105234	1.017569437	1.013495126	1.013410333
15:47:55.968	1.034084511	1.033292249	1.024309507	1.025973929	1.027577307	1.027563041	1.034891562	1.036999184	1.037235825	1.039815279	1.038418457	1.036640988	1.035461178	1.034961353	1.02925239	1.017708332	1.013653168	1.01355148
15:47:56.832	1.033727422	1.034875064	1.024222427	1.025923785	1.027577569	1.027510419	1.034787748	1.036920514	1.037311374	1.039698878	1.038396582	1.036527787	1.035363798	1.034944229	1.029121469	1.017583095	1.013444291	1.013426686
15:47:57.696	1.034615274	1.034772323	1.024197546	1.025900078	1.027497827	1.02746415	1.034739639	1.036867669	1.037109916	1.039558632	1.038300442	1.03643885	1.035306944	1.03486821	1.029086068	1.01759399	1.013354109	1.013457604
15:47:58.560	1.034348436	1.035083289	1.024215555	1.025905617	1.027555239	1.027479647	1.034795004	1.036946671	1.037200638	1.039722898	1.03848346	1.036661498	1.035456274	1.035054735	1.029366724	1.017929565	1.013624353	1.013823217
15:47:59.424	1.033302686	1.034095472	1.024126834	1.025879571	1.027370698	1.027353841	1.034583705	1.036671877	1.036981795	1.039523748	1.038143404	1.03639957	1.035266188	1.034770918	1.029194893	1.017865828	1.01344127	1.013768021
15:49:15.456	1.029692839	1.03352616	1.022694646	1.023824062	1.024752834	1.024808386	1.030284263	1.032024789	1.031722184	1.03399965	1.032590446	1.031019408	1.0302161	1.029558234	1.025002267	1.015256781	1.011939562	1.011715156
15:49:16.320	1.031966091	1.032446531	1.022544078	1.023890121	1.024705871	1.024610467	1.030296616	1.031822793	1.031735441	1.033823349	1.032529409	1.030944024	1.030072494	1.029457565	1.024834619	1.015107127	1.011871128	1.011591849
15:49:17.184	1.031856865	1.032954846	1.022592478	1.024002735	1.024749366	1.024645556	1.030308054	1.031807249	1.03172242	1.033865502	1.032454839	1.030873085	1.030004367	1.029374047	1.024772538	1.015020225	1.01179357	1.011550331
15:49:18.048	1.032726647	1.031095316	1.022540607	1.023940364	1.02462382	1.024566858	1.030119085	1.031652325	1.031458399	1.033606934	1.032266286	1.030710189	1.029809598	1.029180025	1.024594413	1.014878447	1.011617091	1.011390993
15:49:18.912	1.032280277	1.032554602	1.022344047	1.023810169	1.024488216	1.024344147	1.029900722	1.031346658	1.031243533	1.033267176	1.031896502	1.030296638	1.029408649	1.028790002	1.024153322	1.014459553	1.011231647	1.010937397
15:49:19.776	1.031908042	1.032629222	1.02230234	1.023678018	1.024363872	1.024278108	1.029689185	1.031171581	1.03101901	1.033139942	1.031691624	1.030083997	1.029240139	1.028660982	1.023999191	1.014368555	1.011069583	1.01088097
15:49:20.640	1.031831395	1.03366211	1.022231138	1.023686015	1.024329689	1.02423398	1.029701713	1.031139897	1.031030215	1.033087966	1.031692164	1.030117782	1.029224371	1.028622459	1.024106799	1.014546459	1.011193378	1.011084203
15:49:22.368	1.031323409	1.031797366	1.022234567	1.023483218	1.02409885	1.024074195	1.029437444	1.030846864	1.030684568	1.032736364	1.031257012	1.029758124	1.028858462	1.02819461	1.0236972	1.014178974	1.010881743	1.010711667
15:49:23.232	1.031704943	1.031588944	1.022082818	1.023459318	1.024015621	1.023941417	1.029278114	1.030736892	1.030564579	1.032636746	1.031127938	1.029593364	1.028718805	1.028104219	1.023559246	1.014046075	1.010780914	1.010601239
15:49:24.096	1.031713131	1.03132953	1.022106076	1.023377457	1.023965408	1.023884792	1.029168541	1.030593726	1.030352573	1.032437145	1.030946026	1.029380351	1.028542748	1.027976674	1.023378393	1.013879298	1.010569164	1.010445646
15:49:24.960	1.031776718	1.029732967	1.021980324	1.023316487	1.023853657	1.023764691	1.029021362	1.030395963	1.030193712	1.032151257	1.030690757	1.029188669	1.028276974	1.027686607	1.023093756	1.013619592	1.010261557	1.010176777
15:49:25.824	1.03127745	1.031049345	1.022137195	1.023407303	1.023927353	1.0238687	1.029123836	1.03054697	1.030395291	1.032360544	1.031000094	1.029491462	1.028600624	1.027969069	1.023526063	1.014099899	1.010679053	1.010700777
15:49:26.688	1.031700647	1.031403629	1.022045905	1.023347348	1.02389306	1.023848701	1.029031772	1.030497302	1.030304081	1.032335655	1.030969376	1.029444393	1.028617203	1.027983283	1.023586696	1.014225009	1.010930709	1.010882715
15:49:27.552	1.030696428	1.03240062	1.021963403	1.023218171	1.023714817	1.023586804	1.028776047	1.030168487	1.029936163	1.03204351	1.030541487	1.028979146	1.028135962	1.027467049	1.023090277	1.01371755	1.010392415	1.010367223
15:49:28.416	1.031716126	1.032390684	1.022041286	1.023278359	1.023783291	1.02368956	1.028929329	1.030326846	1.030170557	1.032150274	1.030783665	1.029286972	1.028452154	1.02781524	1.023514919	1.014211064	1.010948097	1.010894914
15:49:30.144	1.031221002	1.034027063	1.021943927	1.023172481	1.023688869	1.023647053	1.028813203	1.030234556	1.030034429	1.031959511	1.030653672	1.029175371	1.028334953	1.027732304	1.023385373	1.014111691	1.010809559	1.010813326
15:49:31.008	1.030645994	1.03220125	1.021930998	1.023143937	1.023736886	1.023694653	1.028826461	1.030182166	1.030006811	1.032090183	1.030747383	1.029238523	1.02839544	1.027738115	1.023527021	1.014296647	1.010927063	1.011039655
15:49:31.872	1.031248672	1.031527938	1.021828959	1.02313106	1.023616295	1.023596188	1.028708053	1.030059675	1.029894413	1.031845123	1.030555108	1.029043239	1.02818407	1.027594974	1.023333471	1.014120726	1.0106617	1.0108698
15:49:32.736	1.030873351	1.03240937	1.021852761	1.023106188	1.023620355	1.023577653	1.028691594	1.030007937	1.029889019	1.031842963	1.030491995	1.028963591	1.028181394	1.027540722	1.023276767	1.014101365	1.010608229	1.010862142
15:49:33.600	1.030632802	1.033139822	1.021903888	1.023144709	1.02369341	1.023691092	1.028865418	1.030167207	1.030003265	1.03200623	1.030716309	1.029245624	1.028359256	1.027667673	1.023503532	1.014314509	1.010721579	1.01105945
15:49:34.464	1.031321121	1.031677412	1.021877445	1.023192098	1.023727679	1.023612237	1.028853436	1.030195877	1.030056116	1.032065084	1.030764003	1.029316971	1.028429692	1.027770229	1.023583111	1.014470662	1.010695177	1.011164076
15:49:35.328	1.03156998	1.031372038	1.021869636	1.023085479	1.023634074	1.023642593	1.028702612	1.030031948	1.029857231	1.031829806	1.030482226	1.029060342	1.028137857	1.027522515	1.023262707	1.014076577	1.010257489	1.010786576
[truncated: 4,954 more rows]
