# Supplementary material for: Measurements of spectral irradiance during the solar eclipse of 21 August 2017: reassessment of the effect of solar limb darkening and of changes in total ozone
Source: Copernicus journal article supplement (doi:10.5194/acp-2018-1048), 2018-11-02
Supplement: Supplementary file 1 [file acp-2018-1048-supplement.zip › Fig14_Shadowbanding.csv]

Time (UT)	306 (1)	306 (2)	315	320	340 (1)	340 (2)	380	395	412	443	490	532	555 (1)	555 (2)	665	875	940	1020
17:18:00.264	0.01234532	0.013662572	0.072398695	0.11658199	0.258481758	0.258845723	0.379726314	0.489275289	0.678840062	0.817234434	1.04263691	1.0509316	1.079941706	1.083455085	1.06263916	0.771074405	0.37760511	0.597951989
17:18:00.949	0.01216314	0.013557805	0.071432487	0.11516074	0.255316507	0.255588933	0.375192196	0.483550413	0.670652958	0.807477703	1.030387671	1.038727914	1.067507467	1.070991852	1.050677037	0.762651393	0.373481434	0.591459375
17:18:01.572	0.011990184	0.013376676	0.070614146	0.113843694	0.252446509	0.252649215	0.371039953	0.478324161	0.663138567	0.798527978	1.019166807	1.027535555	1.056086033	1.059558729	1.039703052	0.754884901	0.369698509	0.585495158
17:18:02.135	0.011914613	0.013245634	0.069856001	0.112553436	0.249813252	0.250104267	0.367247315	0.47350652	0.656262019	0.790346332	1.008876445	1.017247674	1.045590203	1.049039483	1.029604456	0.74774279	0.366198201	0.579985785
17:18:02.638	0.011697047	0.013122932	0.069137222	0.11148222	0.247348219	0.247637497	0.363910287	0.469174178	0.650075246	0.782988706	0.999628202	1.008017111	1.036156653	1.039577315	1.020547236	0.741326289	0.363063013	0.575038899
17:18:03.079	0.011528104	0.012965615	0.068484423	0.110465358	0.245194735	0.245437459	0.360841012	0.465235388	0.644449706	0.776308972	0.991199725	0.999578633	1.027559258	1.030947617	1.012255032	0.735439941	0.360198617	0.570486339
17:18:03.460	0.011455415	0.013029579	0.067908259	0.109583752	0.243218825	0.243487338	0.358052164	0.461776162	0.639482229	0.770420918	0.983751524	0.992115507	1.019952731	1.023331005	1.004885304	0.730211193	0.357643932	0.566458372
17:18:03.779	0.011303902	0.012997247	0.067463044	0.108819996	0.241586863	0.241909179	0.355669397	0.45872868	0.635134437	0.765260352	0.977272014	0.985602778	1.013313509	1.016701359	0.998463074	0.72566213	0.355409015	0.562928509
17:18:03.845	0.011270792	0.012804878	0.067450319	0.108672341	0.241249965	0.241517486	0.355076284	0.458300773	0.634413857	0.764421798	0.976213114	0.984559065	1.012228668	1.015594427	0.997421165	0.724948466	0.355060202	0.562369636
17:18:03.910	0.011290305	0.012993833	0.067421162	0.108586533	0.240991874	0.241189708	0.354611101	0.457821129	0.633737763	0.76361474	0.975234335	0.983577833	1.011229199	1.014573465	0.99648592	0.724311769	0.354766713	0.561873385
17:18:03.975	0.011321778	0.01286769	0.067300443	0.108457153	0.240663903	0.240994259	0.354242179	0.457377812	0.633094228	0.762843321	0.974240757	0.982550276	1.010205407	1.013565781	0.995485528	0.723601243	0.354422942	0.561329212
17:18:04.041	0.011341364	0.012697023	0.067309401	0.10830154	0.240365647	0.240742326	0.354051803	0.456912631	0.63247332	0.762113718	0.973312898	0.981653082	1.009248951	1.012622637	0.994600375	0.722984066	0.354116785	0.560862253
17:18:04.106	0.011375565	0.012459794	0.067203443	0.108254962	0.240053073	0.240274788	0.353679725	0.456465406	0.631834822	0.761355799	0.972364381	0.98070446	1.008325765	1.01163152	0.993701748	0.722373419	0.353790683	0.560378751
17:18:04.172	0.011498561	0.01221086	0.067189906	0.108192591	0.23977118	0.24008544	0.35316083	0.455926185	0.631106454	0.760521938	0.971308652	0.979627213	1.007224272	1.010530164	0.992649699	0.721618386	0.353405043	0.559799206
17:18:04.237	0.011622395	0.012206421	0.06707133	0.108116836	0.239477055	0.239746256	0.35262136	0.455479297	0.630413747	0.759725489	0.97027825	0.978606902	1.006170733	1.009448581	0.991634425	0.720908315	0.353073113	0.559250489
17:18:04.303	0.011607461	0.012178583	0.066990309	0.107994147	0.239164243	0.239407867	0.35214199	0.45493726	0.629709201	0.758839963	0.969225605	0.977581453	1.005110077	1.008386617	0.99060092	0.720166779	0.352710367	0.558672949
17:18:04.368	0.011646321	0.012032533	0.066944301	0.107851829	0.23885901	0.239088309	0.35178221	0.454394401	0.628961062	0.757944268	0.968118692	0.976464128	1.003940108	1.007195168	0.989473849	0.719355783	0.352304291	0.55803961
17:18:04.433	0.011658526	0.011967572	0.066849537	0.107731282	0.238484719	0.239014054	0.351365757	0.453820193	0.628227852	0.757053167	0.966984956	0.975325064	1.002735694	1.005968877	0.988315136	0.718539708	0.351890632	0.557377412
17:18:04.497	0.011589159	0.011913511	0.066806278	0.107681582	0.238118247	0.238532729	0.351063655	0.453338116	0.627532059	0.756236517	0.966031989	0.974349194	1.001736639	1.004967277	0.987376526	0.717900143	0.35157512	0.556882146
17:18:04.562	0.011563629	0.012040194	0.06679732	0.107543834	0.237858852	0.238448133	0.350629663	0.452868959	0.626858917	0.755457668	0.965042376	0.973397651	1.000755135	1.003983797	0.98642111	0.717261371	0.351262234	0.556383726
17:18:04.628	0.011665268	0.011860655	0.066740218	0.107446307	0.237620272	0.238292997	0.350180546	0.452426566	0.626249151	0.754741755	0.964103548	0.972519349	0.999839032	1.003110639	0.985564328	0.716677128	0.350989266	0.555957976
17:18:04.692	0.011588353	0.011817889	0.066696041	0.107350476	0.237384942	0.238108684	0.349921196	0.451975488	0.625608641	0.753931145	0.963153269	0.971568693	0.998855835	1.002138316	0.984648848	0.716042676	0.350675987	0.555452112
17:18:04.758	0.011677141	0.011751722	0.066608505	0.107222523	0.237126991	0.237661567	0.349499503	0.45158553	0.624984574	0.753223819	0.962225234	0.970673717	0.997927778	1.001186652	0.983781472	0.715431117	0.350400055	0.554995552
17:18:04.824	0.011605529	0.011562502	0.066571249	0.107094571	0.23688853	0.237496355	0.349102214	0.451065289	0.624338552	0.752501692	0.961325124	0.969765062	0.997019104	1.000274237	0.982886147	0.714791502	0.350108757	0.554519025
17:18:04.889	0.011510799	0.011343019	0.066477403	0.106916385	0.23661927	0.237203406	0.348806161	0.450638204	0.623668842	0.751673452	0.960270981	0.968749594	0.995984809	0.999223609	0.981871045	0.71406758	0.349745309	0.553960983
17:18:04.955	0.011354407	0.011364668	0.066432806	0.106818591	0.236363245	0.237031824	0.348241154	0.450126761	0.62291182	0.750816972	0.959183494	0.967708062	0.994908605	0.998151663	0.980823816	0.713346036	0.34938745	0.553394268
17:18:05.020	0.011363878	0.011330374	0.066292747	0.106769427	0.236074014	0.236776971	0.347827932	0.449602882	0.622168485	0.749947364	0.958056056	0.966563415	0.993747826	0.997016377	0.979710579	0.712550933	0.349015687	0.552778944
17:18:05.086	0.011384908	0.011528876	0.066229542	0.106597486	0.235870328	0.236615204	0.347399383	0.449122506	0.621447812	0.749107137	0.956985219	0.96549286	0.992652794	0.995951378	0.978642943	0.711787447	0.348654065	0.552196237
17:18:05.151	0.011199773	0.011644665	0.066105156	0.106429738	0.235661586	0.236352131	0.34707469	0.448641105	0.620759141	0.748262544	0.955913501	0.96446412	0.991579424	0.994856757	0.97758393	0.711014918	0.34830389	0.551620957
17:18:05.216	0.011087699	0.011632965	0.06610841	0.106251639	0.235448511	0.236090117	0.346889558	0.448172297	0.62009901	0.747414111	0.954917676	0.963473683	0.990561056	0.993831697	0.976610673	0.710352593	0.347974543	0.551110448
17:18:05.281	0.011019942	0.011580202	0.066065151	0.10618222	0.235241452	0.235931796	0.346467465	0.447748929	0.619525467	0.746709949	0.954028358	0.962586397	0.989668758	0.992939311	0.975774643	0.709760134	0.347690367	0.550681274
17:18:05.345	0.010941263	0.011895707	0.065982912	0.10605266	0.235052922	0.235723886	0.346014719	0.447318476	0.618909084	0.745989435	0.953128337	0.961719335	0.988777772	0.99205113	0.974928659	0.709146838	0.347415122	0.550224028
17:18:05.412	0.010915248	0.011767007	0.065892321	0.105926492	0.234787033	0.235320792	0.345702334	0.446926243	0.618255156	0.745251983	0.952196117	0.9607882	0.987867059	0.991126868	0.974044696	0.708528059	0.347123445	0.549757683
17:18:05.478	0.010862905	0.011739169	0.065775162	0.105813261	0.234546045	0.235111022	0.345326625	0.446486981	0.617583397	0.744459664	0.951118409	0.959765819	0.986796522	0.990021353	0.972973257	0.707749169	0.346759983	0.549166754
17:18:05.543	0.010858088	0.011490236	0.065692211	0.105701618	0.234391326	0.234695698	0.344906544	0.445998494	0.616887387	0.743606439	0.950033344	0.958645389	0.985668979	0.988894384	0.971886608	0.706940822	0.346374582	0.548542467
17:18:05.608	0.010767364	0.011516864	0.065604881	0.105592938	0.234057339	0.234207743	0.344558864	0.44549007	0.616120503	0.742664091	0.948934581	0.957457374	0.984449294	0.987630154	0.970700572	0.706073762	0.345945346	0.547862786
17:18:05.674	0.010790165	0.011457153	0.065584936	0.105468019	0.233870225	0.233872539	0.344109545	0.44499327	0.615370568	0.741776191	0.947759571	0.956296904	0.983233374	0.986405413	0.969531156	0.70523103	0.345540423	0.547223122
17:18:05.740	0.010709883	0.011396231	0.065274389	0.105350059	0.233616726	0.232466744	0.343220003	0.444469448	0.614563491	0.740885972	0.946644951	0.955114028	0.982075014	0.985263735	0.968357514	0.70441202	0.345145808	0.546586439
17:18:05.805	0.010847967	0.011704068	0.065236321	0.10517892	0.233265774	0.232427757	0.342940689	0.443923074	0.613796359	0.739941996	0.945416292	0.953876694	0.980794004	0.983984759	0.967101011	0.703496741	0.344695153	0.545873482
17:18:05.871	0.010824041	0.011752484	0.065216774	0.105054714	0.233020336	0.232449238	0.342551869	0.443341646	0.613012434	0.738971834	0.944184329	0.952611741	0.979495408	0.982717164	0.965816058	0.702562398	0.34422683	0.54514653
17:18:05.935	0.010956986	0.011689546	0.065115209	0.104979227	0.232762863	0.232202875	0.342197132	0.442785371	0.612311981	0.738089685	0.943069092	0.95146055	0.978307647	0.981525064	0.964667454	0.701722973	0.34382237	0.544504978
17:18:06.001	0.010915724	0.011788802	0.065052304	0.104851006	0.232521395	0.232091228	0.341834325	0.442347968	0.611629044	0.737258699	0.942078377	0.950464345	0.977272799	0.980472781	0.963684636	0.701014775	0.343494849	0.543960832
17:18:06.065	0.010939809	0.011667357	0.064965173	0.104721982	0.232183194	0.231809058	0.341571146	0.441897374	0.610970982	0.736442719	0.941037713	0.949453684	0.976218673	0.979399381	0.962682288	0.700293282	0.343155348	0.54340204
17:18:06.131	0.011024271	0.011550358	0.064858809	0.10462624	0.231909964	0.2314171	0.341210761	0.441427113	0.610261492	0.735618471	0.940017926	0.948397178	0.975150243	0.978329129	0.961664353	0.699597349	0.342812209	0.542850613
17:18:06.195	0.010980919	0.011811802	0.064758042	0.104533295	0.23160437	0.230990405	0.340776165	0.440891936	0.609502003	0.734745144	0.938910001	0.947259039	0.973970531	0.977148209	0.96050636	0.698751294	0.342407581	0.54220709
17:18:06.261	0.01099184	0.011719321	0.064642108	0.104331641	0.231335473	0.230470888	0.340357697	0.440363158	0.608722707	0.733835744	0.93777067	0.946114503	0.972767947	0.975927994	0.959333783	0.697912933	0.342021548	0.541541757
17:18:06.326	0.011015765	0.01154745	0.064526779	0.104239827	0.231000643	0.230225581	0.340039262	0.439900872	0.607995417	0.732962516	0.936688161	0.944992927	0.971635257	0.974802996	0.958233832	0.697146393	0.341644546	0.540952834
17:18:06.391	0.010996019	0.011618455	0.064521588	0.104099294	0.230863124	0.230005205	0.33955848	0.439350589	0.60729033	0.73210224	0.935633004	0.94392104	0.970531345	0.973722186	0.95717931	0.696389774	0.34127923	0.540376225
17:18:06.456	0.01101882	0.011476437	0.064460007	0.103975625	0.230627914	0.229713755	0.339174299	0.438822847	0.606559231	0.731202879	0.934570712	0.942843793	0.969448232	0.972655515	0.956114053	0.695635533	0.340918422	0.539802634
17:18:06.522	0.011045153	0.011386066	0.064289613	0.103833307	0.230240506	0.229451772	0.338793145	0.438276484	0.605740496	0.730283272	0.933418079	0.941703435	0.968269177	0.971429868	0.954947516	0.694798926	0.340515071	0.539166268
17:18:06.588	0.011026725	0.011322767	0.064207574	0.103678496	0.230000363	0.229541404	0.338551948	0.437831388	0.60503289	0.729467193	0.932356888	0.940682829	0.96726335	0.970422026	0.95396185	0.694121063	0.340168716	0.538635674
17:18:06.653	0.011030099	0.011304611	0.0640099	0.10353252	0.229662432	0.229448322	0.338253275	0.437327232	0.604364191	0.728700132	0.931428941	0.939788186	0.966370223	0.969529094	0.953116304	0.693533007	0.339903206	0.538186252
17:18:06.719	0.011068959	0.011365939	0.064165427	0.103411705	0.229329768	0.230556305	0.338429714	0.436842677	0.603743025	0.727847006	0.930413735	0.938906039	0.96539815	0.968539244	0.952222513	0.692898841	0.339607652	0.537706563
17:18:06.784	0.011013407	0.011092397	0.063989036	0.103329081	0.229141358	0.229985874	0.338149396	0.436456403	0.603156472	0.727168422	0.92960683	0.938174737	0.964648885	0.967802126	0.951566367	0.692479078	0.339399502	0.537397672
17:18:06.849	0.01104472	0.010847094	0.06388369	0.103224237	0.228879198	0.229606113	0.337604282	0.435990467	0.602530582	0.726514533	0.92879094	0.937368456	0.963831178	0.966941475	0.950813761	0.691972039	0.339184807	0.537018886
17:18:06.915	0.010990134	0.011072627	0.063782411	0.103068089	0.228606932	0.229353911	0.337170288	0.435574117	0.601876938	0.725784284	0.927909066	0.93649167	0.962931279	0.966007675	0.949969514	0.691383173	0.338905209	0.536578264
17:18:06.981	0.010962515	0.010947149	0.063674217	0.102930144	0.228242504	0.229006241	0.336762314	0.435039436	0.601169967	0.724971673	0.926871837	0.935466701	0.961910147	0.964969216	0.948980045	0.690677539	0.338558559	0.536050806
17:18:07.047	0.010910331	0.010920522	0.063578741	0.102819144	0.227990329	0.22878663	0.336152465	0.434477664	0.600353729	0.724018031	0.925656921	0.934226815	0.960650178	0.96371992	0.947756906	0.68979025	0.338130193	0.535369644
17:18:07.113	0.010843373	0.010911646	0.063546782	0.102671827	0.227664521	0.228453811	0.3357578	0.433958313	0.599599505	0.723145677	0.924520145	0.933077843	0.959510197	0.962583817	0.946639115	0.689009252	0.337765692	0.53477548
17:18:07.179	0.010801465	0.010667957	0.06346047	0.102509492	0.227384793	0.228326782	0.335520836	0.433466402	0.598966654	0.722374205	0.923592241	0.932195104	0.958614858	0.96172079	0.945830392	0.688458819	0.337508931	0.534342854
17:18:07.244	0.010737879	0.010618333	0.063419454	0.102356287	0.227148858	0.228254652	0.335209462	0.433017599	0.598290142	0.721583004	0.922560827	0.931178269	0.957584225	0.960730851	0.94486377	0.687786203	0.337178251	0.533830521
17:18:07.310	0.010658242	0.010764782	0.063380268	0.102206294	0.226824375	0.227987603	0.334795229	0.432478165	0.597536047	0.720689583	0.921419469	0.930037726	0.956430771	0.959602953	0.943758968	0.686995638	0.336809816	0.533221079
17:18:07.375	0.010639454	0.010807149	0.063252321	0.102102254	0.226513246	0.227835643	0.334401169	0.431984249	0.596818047	0.719863465	0.920374004	0.929019782	0.955387355	0.958563295	0.942774538	0.68632422	0.336488939	0.53270178
17:18:07.441	0.010604128	0.011027439	0.063186874	0.10193861	0.226283929	0.227428304	0.333999443	0.431449984	0.596148404	0.719036099	0.919327701	0.927984683	0.954329186	0.957505482	0.941819826	0.685656159	0.336162191	0.53217275
17:18:07.506	0.010681196	0.011460349	0.06319492	0.101793347	0.226066886	0.227150114	0.333550864	0.431008323	0.59553889	0.718252975	0.918373854	0.927043973	0.953382749	0.95658977	0.940947881	0.685072472	0.335893534	0.531715612
17:18:07.572	0.010702998	0.011775402	0.063154303	0.101664502	0.225761651	0.226724744	0.333082588	0.430443048	0.59485041	0.717459165	0.91734376	0.926038746	0.952311176	0.955531529	0.939962026	0.684364679	0.335571899	0.531191632
17:18:07.636	0.01070011	0.011640241	0.063074094	0.101522004	0.225516213	0.226302554	0.332788152	0.429900054	0.59410403	0.716572513	0.916192757	0.924891882	0.951126351	0.954317174	0.938809417	0.683536812	0.33516286	0.530565213
17:18:07.701	0.010574226	0.011607963	0.062958266	0.101374243	0.225213385	0.225969731	0.332439867	0.429396236	0.593426506	0.715752343	0.915184203	0.923831272	0.950094094	0.953294631	0.937823719	0.682835565	0.334828345	0.530045372
17:18:07.766	0.01061244	0.011525255	0.062810267	0.101214525	0.224842101	0.22574405	0.331953237	0.428819224	0.59262988	0.714833062	0.913997168	0.922592088	0.948849084	0.952022878	0.936612066	0.681960777	0.334404109	0.529379325
17:18:07.832	0.010669116	0.011749353	0.063027068	0.101080297	0.224516413	0.22645504	0.332137361	0.428294095	0.591951887	0.713902358	0.912821939	0.921467222	0.947651649	0.950857094	0.935480379	0.681144348	0.333985224	0.528749455
17:18:07.897	0.010710059	0.011554082	0.062889451	0.100952879	0.224221528	0.225653358	0.331621493	0.427762297	0.591167869	0.712940365	0.911572005	0.920251182	0.946436558	0.949673746	0.934304766	0.680312364	0.333608461	0.528117299
17:18:07.962	0.010731096	0.011767509	0.062788577	0.100825195	0.224022413	0.22519245	0.331093522	0.427290932	0.590428007	0.712024249	0.910473065	0.919140439	0.945315407	0.9485581	0.933205535	0.679578538	0.333254943	0.527544033
17:18:08.027	0.01059173	0.011757825	0.062694226	0.100716604	0.223693959	0.224707176	0.33079021	0.426739546	0.589687361	0.711167266	0.909408703	0.918091919	0.944241899	0.947478429	0.93217325	0.678882555	0.332923659	0.527026252
17:18:08.092	0.010619988	0.01195189	0.062551518	0.10060052	0.22343216	0.224566357	0.330311646	0.426250383	0.588955442	0.71028768	0.908318	0.917018997	0.94312555	0.946333544	0.931126944	0.678126611	0.33254316	0.526468409
17:18:08.157	0.010710865	0.011999495	0.06244912	0.100496569	0.223131739	0.224182089	0.329698371	0.425754338	0.588155204	0.709394069	0.907123918	0.915815159	0.941898091	0.945132676	0.929950454	0.677282428	0.332137562	0.525835937
17:18:08.223	0.010785133	0.012165719	0.062375321	0.100403593	0.222851933	0.223867037	0.329205688	0.425247773	0.587403183	0.708489779	0.906049689	0.914730296	0.940821577	0.944012437	0.928903365	0.676547658	0.331790898	0.525267315
17:18:08.288	0.010771323	0.011936965	0.062239028	0.10034042	0.222627431	0.223426016	0.328859822	0.424716673	0.586721825	0.70771306	0.905086064	0.913800492	0.939874829	0.943064107	0.928010998	0.675934193	0.331504094	0.524823016
17:18:08.354	0.010828804	0.011899849	0.062184781	0.100161696	0.222299218	0.222996136	0.328494795	0.424168599	0.585985813	0.706843315	0.904012011	0.912721507	0.93878795	0.941921837	0.926966836	0.67520558	0.331141672	0.524272826
17:18:08.420	0.010797658	0.01189541	0.06209592	0.100048734	0.221852977	0.222761439	0.328030752	0.42366726	0.585231713	0.706035397	0.902976368	0.911678644	0.937745467	0.940849898	0.925975833	0.674525625	0.330823266	0.523768127
17:18:08.485	0.010704371	0.01173201	0.061959115	0.099945319	0.221516824	0.222376377	0.327712182	0.423128861	0.584493214	0.705190758	0.901949402	0.910649239	0.936690719	0.939813448	0.924971936	0.673831312	0.33046722	0.523249677
17:18:08.551	0.010678363	0.011566188	0.061887984	0.099795594	0.221170325	0.222057614	0.327244508	0.422612191	0.583732161	0.704246319	0.90085544	0.909552655	0.93559123	0.938700155	0.923906491	0.673102987	0.330125921	0.522690425
17:18:08.618	0.010695221	0.011478237	0.061881781	0.099729922	0.220901305	0.221739438	0.326687698	0.422189916	0.583041596	0.703443002	0.899903619	0.908592757	0.934624824	0.937765343	0.923023858	0.672525644	0.329837966	0.522235582
17:18:08.683	0.010657328	0.01141247	0.061817046	0.099582696	0.220644438	0.22141935	0.326318845	0.421610268	0.582284544	0.702566519	0.898779264	0.907499168	0.933458068	0.93656996	0.921948726	0.671769328	0.329465389	0.521648619
17:18:08.749	0.010553921	0.011782438	0.061513521	0.099438147	0.220361342	0.22000056	0.325394589	0.421087966	0.581489755	0.701706753	0.897755998	0.906455528	0.93244008	0.935521019	0.920961041	0.671106582	0.329175158	0.521146685
17:18:08.814	0.01044972	0.011583757	0.061139463	0.099290415	0.220061404	0.218857304	0.324587707	0.420540567	0.58063703	0.700800052	0.896664414	0.905323046	0.93133717	0.934419212	0.919879525	0.670361655	0.328848677	0.520576121
17:18:08.880	0.01029927	0.011427619	0.061140688	0.099155236	0.219733431	0.21915008	0.324387647	0.420003205	0.57990634	0.699937647	0.895648064	0.904271753	0.930252157	0.933348323	0.918844204	0.669648547	0.328486549	0.520035472
17:18:08.946	0.01022316	0.011198457	0.061092038	0.098976155	0.219347105	0.219062564	0.32407627	0.419418679	0.579152719	0.699065902	0.894498294	0.903141303	0.929114077	0.932183896	0.917774127	0.668873386	0.328105475	0.519437405
17:18:09.011	0.010333304	0.011274713	0.061020787	0.098810994	0.219049692	0.218855975	0.323689062	0.418920911	0.5784346	0.698198059	0.893481679	0.902140551	0.928089732	0.931194061	0.916820745	0.668189533	0.327775791	0.518923319
17:18:09.077	0.010303122	0.011216206	0.060977328	0.098634235	0.218679008	0.218529521	0.323378894	0.418375292	0.577674105	0.69724809	0.892408243	0.901052989	0.926982504	0.93008064	0.915779337	0.667464295	0.327444605	0.518358962
17:18:09.142	0.010198436	0.011251087	0.060893252	0.098480138	0.218401688	0.218313651	0.323146367	0.417858137	0.576992458	0.69643646	0.891413299	0.900087803	0.926009257	0.929095331	0.914853935	0.666831428	0.327133714	0.517873065
17:18:09.207	0.010085794	0.011414486	0.060827705	0.098359324	0.218121921	0.217997274	0.322745246	0.417316652	0.576290777	0.695633463	0.890436768	0.899145244	0.925024954	0.928123555	0.913955449	0.6662265	0.326848161	0.517433012
17:18:09.273	0.010094945	0.011679151	0.060721747	0.098132151	0.217835095	0.217888811	0.322163027	0.416802461	0.575531314	0.694745191	0.889372493	0.898115839	0.923942325	0.926986957	0.912937608	0.665520226	0.326493982	0.516895408
17:18:09.339	0.009981586	0.011879261	0.060607849	0.097997328	0.217554527	0.217612742	0.321773156	0.416329372	0.574822356	0.693931652	0.888352179	0.897140264	0.922929831	0.926001408	0.911991878	0.664877202	0.32618708	0.516416242
17:18:09.404	0.009984954	0.011893783	0.060481027	0.097871248	0.217362149	0.217552278	0.321373445	0.415819371	0.574113211	0.693093707	0.88731702	0.896189682	0.921923935	0.924986044	0.911058824	0.664224359	0.325873521	0.51592806
17:18:09.470	0.009885405	0.011646463	0.060466578	0.097711779	0.217098785	0.217339327	0.320887823	0.415271556	0.573351457	0.692165703	0.886143508	0.895048548	0.920769927	0.923815187	0.909958341	0.663443749	0.325520171	0.515334926
17:18:09.534	0.009869825	0.01160572	0.060346052	0.097611577	0.21692734	0.216994043	0.320517758	0.414837047	0.572689427	0.691412522	0.88520706	0.894146399	0.919848435	0.922929718	0.909127505	0.66287523	0.325243326	0.514900159
17:18:09.600	0.009780712	0.011759837	0.060175558	0.097461317	0.216557739	0.216860858	0.320063796	0.414285312	0.571917191	0.690535537	0.884085304	0.893044233	0.918741483	0.921805619	0.908067428	0.662126355	0.324895075	0.51432552
17:18:09.665	0.009909323	0.011786465	0.060026341	0.097361204	0.216267306	0.216590093	0.319600358	0.413844958	0.571178909	0.689685286	0.883033627	0.891991942	0.917694198	0.920791671	0.907083749	0.661452456	0.324563621	0.51381728
17:18:09.731	0.009899689	0.011550444	0.060227369	0.097263232	0.216058805	0.217288083	0.319700388	0.413321766	0.570539436	0.688791393	0.881970718	0.890980468	0.916629741	0.919766288	0.906102825	0.660760556	0.32421773	0.513274083
17:18:09.797	0.009956045	0.011556495	0.060320602	0.097178466	0.215754895	0.217700462	0.319789125	0.412839058	0.569871367	0.687951866	0.880941506	0.8900219	0.915583251	0.91869686	0.905166578	0.660094824	0.323887822	0.512787544
17:18:09.862	0.009998328	0.01170335	0.060198558	0.096996976	0.215471801	0.217052856	0.319358563	0.412388183	0.569229593	0.687232424	0.880016642	0.889123042	0.914701904	0.917801455	0.904372486	0.659576987	0.323641159	0.512383198
17:18:09.928	0.010108958	0.011986978	0.060059717	0.096884906	0.215290491	0.216586648	0.318944129	0.411927981	0.568535472	0.686397354	0.879045836	0.888151682	0.913703437	0.916811463	0.903455425	0.658957161	0.323339693	0.511906996
17:18:09.994	0.010015352	0.011960351	0.059981238	0.096709127	0.215060815	0.216164993	0.318457906	0.411384231	0.567784396	0.685515623	0.877898489	0.88702541	0.912562419	0.915602039	0.902381326	0.658209973	0.322980908	0.511342802
17:18:10.059	0.01002049	0.012070095	0.059837618	0.096654608	0.214821515	0.215839069	0.318145924	0.410835042	0.567089867	0.684756031	0.876872051	0.886025324	0.91154267	0.914598154	0.901434016	0.657555595	0.322648612	0.510854529
17:18:10.125	0.010042969	0.011823402	0.059760058	0.096510505	0.214544916	0.21550095	0.317587699	0.410310397	0.566318571	0.683859667	0.875752454	0.88491495	0.910448363	0.913472242	0.900387537	0.656833208	0.322297748	0.510307456
17:18:10.191	0.010090337	0.011632163	0.059546512	0.096384425	0.214195286	0.215000677	0.317229737	0.409723393	0.56551587	0.682916718	0.87451917	0.883691368	0.909236658	0.912249607	0.899208919	0.656012241	0.321879468	0.509670285
17:18:10.256	0.010059829	0.011508702	0.059510074	0.096304031	0.213908338	0.214633911	0.316865523	0.409185062	0.564779487	0.682030545	0.873422697	0.882579701	0.908137999	0.911154424	0.89817967	0.655296721	0.321545163	0.509115821
17:18:10.322	0.010069302	0.01131222	0.059422851	0.096233719	0.213588428	0.214349891	0.316543503	0.408685232	0.564074518	0.681170414	0.872392295	0.881576175	0.907144126	0.910121308	0.897238541	0.654643726	0.321242559	0.508613029
17:18:10.387	0.010100136	0.011050377	0.059334296	0.096095861	0.2133152	0.213836739	0.316186948	0.408188095	0.56333815	0.680294258	0.871312604	0.880482365	0.906039109	0.909072509	0.896187572	0.653922773	0.320886681	0.508070401
17:18:10.453	0.010231157	0.011001559	0.059226095	0.095965071	0.213004913	0.213492515	0.315730165	0.407686418	0.562640597	0.679492744	0.870345455	0.87951156	0.905061785	0.908089838	0.895272858	0.653293736	0.3205702	0.507608583
17:18:10.520	0.010228268	0.011000747	0.059081051	0.095846933	0.212681514	0.213145376	0.315195135	0.407111241	0.561874281	0.67859644	0.869230174	0.878418008	0.903948062	0.90697001	0.894206912	0.652563234	0.320227904	0.507047425
17:18:10.584	0.010147665	0.010717524	0.059094588	0.095683646	0.212454004	0.212687384	0.314839592	0.406546935	0.561123112	0.67765181	0.868124803	0.877335807	0.902851959	0.905850692	0.89316034	0.651809213	0.319879906	0.506500469
17:18:10.649	0.010116838	0.010920868	0.059012342	0.095550071	0.212117303	0.212272354	0.314366476	0.40594522	0.560326269	0.676703849	0.866963493	0.876173746	0.901682162	0.904648109	0.892025289	0.65101411	0.319505446	0.50588969
17:18:10.714	0.010172717	0.010945076	0.058934782	0.095376167	0.211721714	0.211967117	0.313820556	0.405453162	0.559559478	0.675865904	0.865865611	0.875098015	0.900571894	0.903510912	0.890972551	0.650286644	0.319153389	0.505337078
17:18:10.779	0.010161476	0.010927728	0.058610286	0.095229744	0.211425624	0.210646979	0.312762195	0.404919033	0.558715857	0.674938181	0.864705093	0.873892772	0.899415191	0.902336398	0.889846028	0.649515887	0.318785236	0.504733771
17:18:10.844	0.010098962	0.010564217	0.058509925	0.095145245	0.211103786	0.21036534	0.312353206	0.404299441	0.557859923	0.673904238	0.863466523	0.872687528	0.898148036	0.901077219	0.888627192	0.648641285	0.318360255	0.504052636
17:18:10.910	0.010025907	0.010161972	0.058465142	0.0950164	0.210712889	0.21007707	0.311915987	0.403750162	0.557070831	0.672971116	0.862341287	0.871597489	0.897013307	0.899952648	0.887539072	0.64787208	0.318006793	0.503493636
17:18:10.975	0.010157089	0.009992116	0.058333228	0.094898798	0.210444953	0.209764668	0.311496107	0.403220155	0.556328611	0.67209334	0.861297011	0.870555587	0.895941595	0.898921728	0.886517241	0.647175202	0.317667391	0.502960125
17:18:11.041	0.010176515	0.010046177	0.058336995	0.094748539	0.210162699	0.209443255	0.310993145	0.402716687	0.555577984	0.671210688	0.860234939	0.869524259	0.894900148	0.897881021	0.885527287	0.646497441	0.317346247	0.502445497
17:18:11.106	0.010193374	0.01027413	0.058226352	0.094636638	0.209840262	0.209217835	0.310574571	0.402187717	0.554815637	0.670295834	0.859171061	0.868452299	0.893795995	0.896744866	0.884477037	0.645763024	0.316981506	0.501881953
17:18:11.172	0.010116302	0.010294302	0.058218006	0.094467819	0.209576659	0.209174194	0.310149452	0.401718278	0.554136611	0.669497667	0.858227389	0.867535657	0.892828932	0.895812459	0.883603652	0.645149931	0.31670299	0.501428827
17:18:11.236	0.010237847	0.010268486	0.058137391	0.094311314	0.209267937	0.208859411	0.309764259	0.401238397	0.553449478	0.668735147	0.857252751	0.866568327	0.891851401	0.894836974	0.882680801	0.64451099	0.316399669	0.500939217
17:18:11.302	0.010234636	0.010313675	0.058027959	0.094126257	0.209025387	0.208681994	0.309283276	0.400753628	0.552730203	0.667890561	0.856195833	0.865553599	0.890791644	0.893799219	0.881691848	0.643819377	0.316069101	0.500413764
17:18:11.366	0.010222111	0.010434307	0.057923219	0.093967789	0.208666853	0.208529773	0.308838196	0.400189175	0.551973589	0.666987291	0.855080156	0.864477166	0.889689045	0.892654649	0.88063789	0.643076069	0.315725597	0.499834238
17:18:11.431	0.010194651	0.010441569	0.057833746	0.093798345	0.208387486	0.208449687	0.308461275	0.399635727	0.551184529	0.6661007	0.853962452	0.863379066	0.888564059	0.89153665	0.879572554	0.642341484	0.315374396	0.499265679
17:18:11.495	0.010118064	0.010370963	0.057782341	0.093641751	0.208040504	0.20827121	0.308117024	0.399117402	0.550469207	0.665212147	0.852917823	0.862343154	0.887507411	0.890450534	0.878578985	0.641652131	0.315029179	0.498753563
17:18:11.561	0.010182539	0.010602548	0.057656025	0.093505945	0.20771999	0.208083981	0.307622128	0.398670784	0.549797356	0.664464442	0.851986396	0.861408063	0.886563565	0.889536336	0.877707901	0.641083697	0.314735746	0.498312516
17:18:11.626	0.010050554	0.010317305	0.057678719	0.093404672	0.207445382	0.207783515	0.307237947	0.398177702	0.549116684	0.663673797	0.850961104	0.860428865	0.885545439	0.88853915	0.876760528	0.640423161	0.314412495	0.497811829
17:18:11.692	0.010056171	0.010224286	0.0576549	0.093317228	0.207235197	0.207652246	0.306895309	0.397622396	0.548418563	0.662811331	0.849952153	0.85940031	0.884508069	0.887543995	0.875820869	0.639772191	0.314097967	0.497322644
17:18:11.758	0.009954694	0.010139963	0.057590065	0.093159473	0.206945844	0.207395125	0.306484103	0.397110265	0.547773615	0.662018449	0.848961174	0.85843335	0.883527498	0.886577749	0.874916765	0.63915601	0.313792778	0.496861964
17:18:11.823	0.009948753	0.010414314	0.057580501	0.092995293	0.206683804	0.207318749	0.306001508	0.396615324	0.547097418	0.661229157	0.847949977	0.85741829	0.882501391	0.885546327	0.873957076	0.638482752	0.313471943	0.49637614
17:18:11.889	0.009902186	0.010599904	0.057475255	0.092851101	0.20642032	0.207180054	0.305604824	0.396136198	0.546437725	0.660460103	0.846988421	0.856490519	0.88155834	0.884584471	0.873087682	0.637877201	0.313184747	0.4959149
17:18:11.955	0.009815961	0.010562383	0.057463954	0.09275286	0.206141194	0.207165468	0.305188579	0.395683814	0.545797432	0.659711426	0.846097077	0.855592807	0.880684871	0.883729193	0.872286986	0.63733107	0.312930023	0.495486385
17:18:12.020	0.009704851	0.010616044	0.057339262	0.092598139	0.205857619	0.206775096	0.304748938	0.395160138	0.54512687	0.658898777	0.845099844	0.854583367	0.879677109	0.882681862	0.87134509	0.636656413	0.312619665	0.494964474
17:18:12.086	0.009723152	0.010576099	0.057341798	0.092465734	0.205536745	0.206460314	0.304421334	0.394678871	0.544457728	0.658161279	0.844122123	0.853614964	0.878707179	0.88170601	0.870448263	0.636041109	0.31233466	0.494500208
17:18:12.152	0.009798295	0.010506306	0.057245203	0.092374008	0.205240174	0.206154277	0.304010329	0.394148313	0.54375809	0.657315203	0.843113216	0.852575096	0.877685494	0.880631786	0.869483958	0.635360614	0.312014162	0.493973373
17:18:12.218	0.009595986	0.010302153	0.057146879	0.092220446	0.205012663	0.20591109	0.303594488	0.393599878	0.542994607	0.656382423	0.841969172	0.851406492	0.876502915	0.879467276	0.868356465	0.634558087	0.311594519	0.493348761
17:18:12.282	0.009599518	0.010386069	0.057057413	0.092054214	0.204708874	0.205454958	0.303213737	0.393060657	0.542216571	0.65549587	0.840868162	0.850255301	0.875355817	0.878293602	0.867255935	0.633778489	0.311212924	0.492746231
17:18:12.348	0.009479736	0.010407053	0.0570338	0.091946426	0.204416756	0.205188965	0.302723475	0.392582691	0.541497193	0.654648357	0.839834898	0.849184191	0.874300585	0.87723324	0.866222899	0.633046485	0.310865094	0.492184593
17:18:12.413	0.009374087	0.010364287	0.056974974	0.091899493	0.204102741	0.204759349	0.30224088	0.392101008	0.540781489	0.653798144	0.838775733	0.848128314	0.873234229	0.876126316	0.86521487	0.632339907	0.310514779	0.491641839
17:18:12.479	0.009394318	0.010400198	0.056973037	0.091780195	0.203868854	0.204433426	0.301943618	0.391629035	0.5400863	0.65302115	0.837781582	0.847147083	0.872212233	0.87510788	0.864257325	0.631661318	0.310168367	0.491114499
17:18:12.545	0.009421044	0.010384865	0.05688011	0.091624672	0.203631356	0.204157361	0.301433595	0.391107826	0.539412714	0.652221453	0.836756599	0.846156497	0.871188856	0.874068777	0.863306493	0.630988263	0.309837883	0.490613224
17:18:12.610	0.009474191	0.010453859	0.056766213	0.091461118	0.203336591	0.204089741	0.300960073	0.390614597	0.538715409	0.651427644	0.83581993	0.845208171	0.87024425	0.873100282	0.862424032	0.630379877	0.309561192	0.490149066
17:18:12.676	0.009447217	0.01047466	0.056640409	0.091319871	0.203045074	0.203697249	0.300627318	0.390179188	0.537995649	0.650626555	0.834788427	0.844243281	0.869234692	0.872080385	0.861468725	0.629708678	0.309252928	0.489639751
17:18:12.741	0.00946215	0.010820019	0.056526411	0.091184918	0.202821293	0.203492132	0.300329249	0.389702258	0.537287949	0.649800863	0.83383066	0.84328427	0.868258198	0.871104712	0.860548393	0.629080046	0.308959172	0.489154017
17:18:12.807	0.009480936	0.010776041	0.056479385	0.091048934	0.202517864	0.203012928	0.299952328	0.389200029	0.536596951	0.64903978	0.832870734	0.842333836	0.867300843	0.870136645	0.859638186	0.628462549	0.308652663	0.48866606
17:18:12.872	0.009499883	0.010761919	0.056457503	0.090904206	0.202253297	0.202771336	0.299495366	0.388686108	0.535866162	0.648231215	0.831828616	0.841294522	0.866243193	0.869098321	0.858647997	0.627784703	0.308303527	0.488126902
17:18:12.937	0.009522524	0.010935807	0.056353475	0.090717006	0.201939643	0.202449393	0.299106143	0.388194602	0.535189149	0.647442562	0.830815216	0.840314437	0.865220921	0.868046127	0.857705459	0.627131843	0.307969813	0.4876241
17:18:13.001	0.009609549	0.010759004	0.05629047	0.090553005	0.201683015	0.202216556	0.298718733	0.387711827	0.534448472	0.646611804	0.829740987	0.839291797	0.864149589	0.867024536	0.856682674	0.626433312	0.307623683	0.487094465
17:18:13.067	0.009558172	0.01058552	0.056194494	0.090443968	0.201395107	0.201929346	0.298210124	0.387216649	0.533759832	0.64575232	0.828695213	0.83828609	0.863101302	0.866049051	0.855701546	0.625748313	0.307298929	0.4865682
17:18:13.131	0.009440158	0.010422521	0.056145638	0.090253288	0.201119537	0.201737877	0.297798116	0.386695924	0.533018051	0.644919523	0.827617637	0.837221599	0.862023164	0.864963617	0.854654457	0.625031864	0.306928992	0.486008613
17:18:13.197	0.009493787	0.010645634	0.056133725	0.090084469	0.20076257	0.201427865	0.297363315	0.38619534	0.532318449	0.644152539	0.826604678	0.83630004	0.861056931	0.864010634	0.853744939	0.624424052	0.306663846	0.48552493
17:18:13.263	0.009421604	0.010382582	0.056118252	0.089984891	0.200463955	0.20134751	0.297024506	0.3855959	0.531555405	0.6432742	0.825472571	0.835194176	0.859936436	0.862923694	0.852689916	0.623684355	0.306298643	0.484962028
17:18:13.328	0.009483261	0.010389038	0.056049137	0.089872196	0.200244385	0.200967575	0.296653836	0.385058887	0.530869877	0.642487091	0.824453577	0.834226773	0.858929504	0.861908277	0.851769537	0.623052888	0.305980504	0.484474315
17:18:13.394	0.009538816	0.010443907	0.055920372	0.089634316	0.199980179	0.200658888	0.296233356	0.384539469	0.530189174	0.641639395	0.823402738	0.833221325	0.857855754	0.860864102	0.850753027	0.622328122	0.30563561	0.483920168
17:18:13.459	0.009557281	0.010142524	0.055827039	0.089451041	0.199660868	0.200466359	0.295685622	0.384029884	0.52946062	0.640796384	0.822309745	0.83213587	0.856776407	0.859764266	0.849707769	0.621582689	0.305301418	0.483358241
17:18:13.525	0.009568999	0.010000509	0.05578734	0.089347449	0.199316294	0.200089252	0.29539441	0.383499123	0.528651747	0.639884155	0.82115438	0.830983829	0.85560129	0.858555988	0.848542703	0.620763392	0.304922028	0.482697209
17:18:13.591	0.009504131	0.009820161	0.055737572	0.089184519	0.199043665	0.199657512	0.294997323	0.383020549	0.527913496	0.638999883	0.820057996	0.829889871	0.854495962	0.857438873	0.847482454	0.62001649	0.304542386	0.482115992
17:18:13.656	0.009469931	0.009924254	0.055607589	0.089014629	0.198720985	0.199369777	0.29453066	0.382439662	0.527157475	0.638080093	0.818952097	0.828776798	0.853359263	0.856264165	0.846363646	0.619222062	0.304135595	0.481509757
17:18:13.722	0.009492252	0.009709616	0.055508752	0.088870031	0.198361852	0.199079126	0.29409243	0.381908416	0.526424896	0.637299198	0.817894826	0.827744435	0.852302926	0.855213762	0.845352706	0.618505023	0.303779295	0.480968422
17:18:13.788	0.009400569	0.009641835	0.055384472	0.088806412	0.198049401	0.198821623	0.293639278	0.381386587	0.525737195	0.636444726	0.816866715	0.82670464	0.851275644	0.854159605	0.844385819	0.617822166	0.303457548	0.480447993
17:18:13.853	0.009359304	0.009724946	0.05528471	0.088663024	0.197770275	0.19843046	0.293303678	0.380909308	0.525096566	0.635657327	0.815966209	0.825804266	0.850389081	0.853271656	0.843534655	0.6172443	0.303194158	0.480027718
17:18:13.920	0.009345814	0.00976529	0.05520349	0.088595301	0.197570554	0.198038237	0.292986855	0.380430858	0.524387009	0.634863845	0.814944705	0.824789242	0.849374375	0.85224918	0.842554576	0.616538701	0.302841215	0.479500576
17:18:13.985	0.00927067	0.009823071	0.055139879	0.08846699	0.197273141	0.197919694	0.292490951	0.379960113	0.523707721	0.634035232	0.813935226	0.823767971	0.84835466	0.851199789	0.841565216	0.615814086	0.302496096	0.478951895
17:18:14.050	0.009240644	0.009930388	0.055031378	0.088291034	0.197022771	0.197651585	0.292140046	0.379479016	0.523022445	0.633225275	0.812959223	0.822808146	0.847348419	0.850169835	0.840614322	0.615160265	0.302170879	0.478446139
17:18:14.115	0.00929347	0.009971137	0.054947915	0.088150144	0.196713021	0.19730577	0.291748199	0.379081083	0.522412524	0.632501338	0.812098844	0.821969515	0.846481894	0.849342806	0.839842248	0.614608837	0.301912658	0.478040564
17:18:14.180	0.009293149	0.009760126	0.054865064	0.088061363	0.196377948	0.19694325	0.291492887	0.378664248	0.521776736	0.63171483	0.81119803	0.821070139	0.84555401	0.848408616	0.838985013	0.614010135	0.301623228	0.477616305
17:18:14.245	0.00924812	0.010053438	0.054786279	0.087983289	0.19604432	0.19639138	0.291027635	0.37823936	0.521173808	0.63095558	0.810302414	0.820188066	0.844645612	0.847483253	0.838108592	0.613383241	0.301316593	0.477142326
17:18:14.311	0.009265942	0.010225623	0.054630347	0.087830263	0.195770128	0.196169063	0.290657774	0.377761326	0.520480007	0.630132808	0.80928831	0.81919249	0.843609244	0.846470863	0.837134084	0.612689383	0.300979901	0.476625077
17:18:14.376	0.009228852	0.010276055	0.054604398	0.087783894	0.195493046	0.195940197	0.29048716	0.377313616	0.519797452	0.629376608	0.808368775	0.818255735	0.842684089	0.845535759	0.836259118	0.612080474	0.300699797	0.476164163
17:18:14.442	0.009244266	0.010653687	0.054435535	0.087679141	0.195233413	0.195460723	0.290183647	0.376791788	0.51913716	0.628586335	0.807428759	0.817327226	0.841749814	0.844598467	0.835373277	0.611483695	0.300392235	0.475706148
17:18:14.507	0.00915066	0.010700084	0.054394918	0.087568944	0.195017933	0.19527429	0.289892438	0.376308539	0.518558312	0.6278825	0.806608948	0.816512589	0.840928686	0.843818817	0.834628339	0.61096547	0.30014237	0.475342388
17:18:14.573	0.009188714	0.010932876	0.054247837	0.087526471	0.194692969	0.194994775	0.289557866	0.375830438	0.517970092	0.627196577	0.805729277	0.815658541	0.840057635	0.842960279	0.833810289	0.610397559	0.299863236	0.474914731
17:18:14.639	0.00912513	0.010823133	0.054236337	0.087447236	0.194471836	0.194789251	0.289172902	0.375430917	0.517421405	0.626568312	0.804968974	0.814904501	0.83931604	0.842242599	0.833139777	0.609943277	0.29966701	0.474574895
17:18:14.704	0.009051428	0.010574603	0.054255271	0.087339359	0.194193674	0.194431505	0.288745968	0.374926074	0.516751096	0.625678093	0.803961345	0.813876612	0.838277392	0.841175553	0.83212527	0.609231958	0.299330978	0.474017206
17:18:14.770	0.009027665	0.010481808	0.054151756	0.08719008	0.193944626	0.194156231	0.2883392	0.374487646	0.516056247	0.624843068	0.802916496	0.812902368	0.837239193	0.840118804	0.831122342	0.608509301	0.298984609	0.473478129
17:18:14.834	0.009120901	0.01054273	0.054048047	0.087061502	0.193719521	0.193813749	0.287892501	0.374016293	0.515388235	0.624107898	0.801967934	0.811955668	0.836276794	0.839123102	0.830214655	0.607878965	0.298661091	0.472996642
17:18:14.900	0.009106454	0.01044429	0.054047129	0.086907495	0.193318159	0.193505592	0.287446813	0.373461189	0.514686807	0.623249623	0.800976559	0.810944453	0.835235382	0.838058274	0.829209506	0.607192041	0.298329919	0.472451222
17:18:14.966	0.009115445	0.010253054	0.053907881	0.086771066	0.192993196	0.193238278	0.287104581	0.372906908	0.513996623	0.622420257	0.79996404	0.80993956	0.834174243	0.837016017	0.828209333	0.606524082	0.297969996	0.471924839
17:18:15.031	0.009109344	0.010178016	0.05378044	0.086620003	0.19269121	0.192907845	0.286686923	0.372366448	0.513299416	0.621570279	0.798931965	0.808900209	0.833143817	0.83598972	0.827204324	0.605785296	0.297617054	0.471372074
17:18:15.097	0.00908542	0.010311561	0.053689949	0.086543089	0.192430614	0.192486185	0.286233569	0.371837061	0.512531082	0.620665115	0.797803029	0.807796268	0.831988358	0.834798317	0.826046754	0.604981689	0.297231091	0.470735319
17:18:15.163	0.009019107	0.010194157	0.053577275	0.086370968	0.192282269	0.192189699	0.285778196	0.371309938	0.511797274	0.619801675	0.796697659	0.806669627	0.830867311	0.833666283	0.824949933	0.60420091	0.296838022	0.470128831
17:18:15.228	0.009088952	0.010013813	0.053478345	0.086188497	0.192070999	0.192088397	0.285394217	0.370818567	0.511088347	0.618943469	0.7956477	0.805629166	0.829775906	0.832617858	0.8239248	0.60350022	0.296497762	0.469595419
17:18:15.294	0.009060854	0.009975572	0.053439059	0.086039219	0.191763238	0.191820813	0.28503141	0.370333798	0.510372896	0.618073671	0.794609105	0.80455362	0.828706164	0.831562045	0.822885113	0.602787568	0.29612364	0.469032544
17:18:15.359	0.0091254	0.010115974	0.053363223	0.085900261	0.191453434	0.191541303	0.284551234	0.369883689	0.509726214	0.617267289	0.793637991	0.803588287	0.827755961	0.830576174	0.821955721	0.602142081	0.295803198	0.468529219
17:18:15.425	0.009153981	0.009820647	0.053366072	0.085788102	0.19116745	0.191380861	0.284045043	0.369419961	0.509055152	0.616460443	0.792649215	0.80260443	0.826769655	0.829578599	0.821011571	0.601456895	0.295489554	0.468019434
17:18:15.491	0.009123313	0.009777074	0.053218279	0.085656669	0.190888687	0.190965037	0.28350598	0.368944609	0.508363879	0.61562138	0.79163696	0.801551363	0.825710795	0.828474514	0.819990178	0.60074593	0.295141331	0.467461573
17:18:15.556	0.009191874	0.009668233	0.053124533	0.085466703	0.190669838	0.190700903	0.283054242	0.368380021	0.507615735	0.614737519	0.790566828	0.800479477	0.824602669	0.827363469	0.818927347	0.59999255	0.294783136	0.466887864
17:18:15.622	0.009228161	0.009607311	0.052979895	0.085287177	0.190351089	0.190352703	0.282629096	0.367859859	0.506871249	0.613886987	0.78943058	0.799373059	0.823473813	0.826225358	0.817829477	0.599225521	0.294370249	0.466281313
17:18:15.687	0.009211463	0.009495151	0.052918653	0.085118805	0.19012105	0.190032081	0.282338489	0.367451957	0.506251527	0.613230862	0.78852959	0.79852182	0.822619242	0.825426825	0.817059845	0.598683963	0.294098305	0.465882903
17:18:15.752	0.009368331	0.009685987	0.052909183	0.084926788	0.189789829	0.189774578	0.28206543	0.366931435	0.505599049	0.612412919	0.787542179	0.797527464	0.821605573	0.824414698	0.81609471	0.598007686	0.293766585	0.465357776
17:18:15.817	0.00924539	0.009331352	0.052843223	0.084802136	0.189460774	0.189673653	0.281619335	0.36642844	0.50484596	0.611481052	0.786347392	0.796357492	0.820396632	0.823222755	0.814905748	0.597130199	0.293347532	0.464666486
17:18:15.882	0.009241376	0.009464899	0.052723522	0.08466642	0.189207516	0.189527267	0.281228093	0.365976675	0.504139742	0.610653123	0.785287963	0.79533134	0.819325819	0.822208163	0.813902195	0.596412452	0.29301157	0.464132884
17:18:15.947	0.009255667	0.009275678	0.052611048	0.084545694	0.189022113	0.189232632	0.280854799	0.365555571	0.503500275	0.60989989	0.784383978	0.794461689	0.81845273	0.821349849	0.813106131	0.595842532	0.292757619	0.463720894
17:18:16.013	0.009283444	0.00910461	0.052588048	0.084419208	0.188777518	0.189064235	0.280602507	0.365093635	0.502843291	0.609168203	0.783421365	0.793488259	0.817479068	0.820303523	0.812172936	0.59518667	0.292430688	0.463224589
17:18:16.078	0.009324548	0.009038039	0.05254194	0.08428028	0.188438479	0.188830599	0.280373813	0.364584253	0.502157232	0.608367153	0.782338811	0.792401399	0.816395852	0.819208355	0.811135847	0.594432261	0.292060302	0.462660413
17:18:16.144	0.0093846	0.009217982	0.05247598	0.084174366	0.188138421	0.188677048	0.279993871	0.364048265	0.501456846	0.607531017	0.781296076	0.79136837	0.81534176	0.818156034	0.810127005	0.593711848	0.291710997	0.462099417
17:18:16.209	0.009431164	0.009071526	0.052422439	0.084056943	0.187790238	0.188322483	0.279565325	0.363557446	0.500754158	0.606753697	0.780326945	0.790376158	0.814375872	0.817148305	0.809164468	0.593039485	0.291383084	0.461567035
17:18:16.275	0.009453321	0.008735852	0.052323602	0.083919354	0.187486089	0.188022286	0.279290651	0.363081001	0.500137682	0.606101801	0.779486255	0.789551539	0.813522372	0.81626737	0.80839845	0.592486268	0.291139371	0.461159472
17:18:16.340	0.009416873	0.008681791	0.052211847	0.083705117	0.187245102	0.187737201	0.279000248	0.362591895	0.499502994	0.605382511	0.778560995	0.78866026	0.812584366	0.815363235	0.807544501	0.591892239	0.290839969	0.460706761
17:18:16.406	0.009413985	0.00901303	0.052094695	0.083572345	0.186999784	0.187341207	0.278811194	0.362128708	0.49885386	0.604610287	0.777607985	0.787698883	0.811595468	0.814399866	0.806611103	0.59123307	0.290501592	0.46018813
17:18:16.471	0.009461566	0.009143343	0.051961257	0.083368638	0.186752663	0.187156894	0.278535109	0.361618222	0.498152653	0.603780137	0.776533183	0.786663192	0.810522236	0.813379556	0.805591322	0.59049452	0.29012584	0.459621795
17:18:16.536	0.00935752	0.009306252	0.051848577	0.083237831	0.186446346	0.187031725	0.278198722	0.361202954	0.497506002	0.60300671	0.775546124	0.78569198	0.809527189	0.81243334	0.804631069	0.589824063	0.289779372	0.459098981
17:18:16.601	0.009375824	0.009535009	0.051890106	0.083182062	0.186160762	0.186835746	0.277931713	0.360749736	0.496861957	0.602237885	0.77464531	0.784795969	0.808621589	0.811525653	0.803769296	0.589231941	0.289497471	0.458655287
17:18:16.666	0.009395092	0.009701637	0.05175022	0.083057857	0.185808368	0.186620141	0.277465252	0.360229078	0.496170262	0.60137297	0.773631514	0.783770298	0.807566495	0.810387572	0.802734586	0.588508323	0.289143236	0.458098086
17:18:16.732	0.009350297	0.009466823	0.051601209	0.082965862	0.185589281	0.186328161	0.277190174	0.359838985	0.495573986	0.600789084	0.77290297	0.783048682	0.806867223	0.809692409	0.802089331	0.588097029	0.288919538	0.457791896
17:18:16.797	0.0093625	0.009608839	0.051491996	0.08283425	0.185291027	0.185918437	0.276922356	0.359387772	0.494948153	0.600046863	0.772018982	0.782164391	0.805964663	0.808789915	0.801239905	0.587526772	0.288641035	0.457358512
17:18:16.863	0.00928254	0.009293469	0.051354486	0.082739937	0.185054372	0.185489877	0.276633361	0.358940614	0.494285436	0.599260074	0.77101448	0.78116216	0.804961082	0.807751816	0.800240828	0.586822117	0.288301534	0.456803397
17:18:16.929	0.009198403	0.009422575	0.051346653	0.082566657	0.184730612	0.185043556	0.276237483	0.358452071	0.493624706	0.598490184	0.770037067	0.780170058	0.803956879	0.806731738	0.79925995	0.586149754	0.28797671	0.456271494
17:18:16.994	0.009137229	0.009697731	0.051253113	0.082474356	0.184415393	0.184496722	0.275707093	0.357956511	0.492913198	0.597658498	0.769013361	0.77917792	0.802910561	0.805752596	0.798267241	0.585485085	0.287628473	0.455736384
17:18:17.060	0.009094037	0.009696118	0.051073968	0.082302859	0.184193294	0.184208987	0.275319079	0.357475042	0.492267337	0.596874264	0.768060967	0.778243569	0.801988723	0.804815394	0.797377691	0.584875079	0.287327849	0.455272921
17:18:17.126	0.008988706	0.009431449	0.050960882	0.082205691	0.183846672	0.183862907	0.275033917	0.357034687	0.491639017	0.596152274	0.767144472	0.777337206	0.801062187	0.803872062	0.796489377	0.584271248	0.28702349	0.454809124
17:18:17.191	0.008916131	0.009498422	0.050832735	0.082149119	0.183639854	0.183677535	0.274689062	0.356542427	0.490978343	0.595348212	0.766069142	0.776342258	0.800012656	0.802831723	0.795497435	0.583560063	0.286697514	0.454265096
17:18:17.256	0.008840826	0.009694503	0.050760672	0.082045704	0.183386355	0.183318459	0.274225225	0.356079725	0.49032955	0.594501725	0.765044555	0.775337845	0.79900099	0.801831982	0.794503459	0.582864924	0.286370176	0.453737918
17:18:17.321	0.008823164	0.009588797	0.050687691	0.082055341	0.183163296	0.182987231	0.273771061	0.355564913	0.489680324	0.593748157	0.764144666	0.774447195	0.798080223	0.800887781	0.793615568	0.582257735	0.286066238	0.453266405
17:18:17.386	0.008726181	0.009283783	0.050606564	0.081908027	0.18289921	0.182910117	0.273290168	0.355088953	0.488956931	0.592896986	0.763092813	0.773402372	0.796990373	0.79984132	0.792568464	0.581528482	0.2857247	0.452703629
17:18:17.451	0.008755832	0.009172836	0.050600155	0.081869481	0.182516494	0.182557942	0.272961847	0.354676376	0.488371451	0.592210089	0.762260184	0.772612359	0.796167311	0.798985621	0.79181412	0.581017545	0.285486662	0.452322088
17:18:17.516	0.00872115	0.008987244	0.050593845	0.081711457	0.182280921	0.182036565	0.272650671	0.354243389	0.487748927	0.591503234	0.761390996	0.771785337	0.795328218	0.798100699	0.791025334	0.580475363	0.285235421	0.451909375
17:18:17.580	0.008676513	0.008877909	0.05039333	0.081576188	0.182097205	0.181740609	0.272300371	0.353777532	0.487092016	0.59074095	0.760410236	0.770782181	0.794318626	0.797085087	0.790052672	0.579767435	0.284908743	0.451369512
17:18:17.646	0.008676834	0.009069144	0.050266607	0.081477293	0.181869212	0.181488146	0.271953097	0.353295725	0.48644971	0.590022299	0.759448284	0.769825869	0.793340438	0.79616518	0.789140556	0.579129607	0.284583147	0.450866575
17:18:17.711	0.008605222	0.009267647	0.050206963	0.081292236	0.181690066	0.181539064	0.271526765	0.352781736	0.485744937	0.589143595	0.758345116	0.768722927	0.792205847	0.795027653	0.788038649	0.578340915	0.284226497	0.450257639
17:18:17.777	0.008588202	0.009379805	0.050188335	0.081183021	0.181441261	0.181444123	0.271142785	0.352260572	0.485071795	0.588319705	0.757293528	0.767655699	0.791136554	0.793911437	0.786984941	0.577582069	0.283871251	0.449684419
17:18:17.843	0.008562351	0.009529353	0.05008645	0.080990378	0.181114972	0.181198555	0.270708593	0.351721081	0.484396697	0.587518381	0.75633924	0.76669458	0.790141507	0.792960514	0.786069648	0.57694657	0.283556582	0.449197266
17:18:17.908	0.008575678	0.009540649	0.050018354	0.080924795	0.180741279	0.181071526	0.270363536	0.351289186	0.483754138	0.586764684	0.755370769	0.765750284	0.789193999	0.792010963	0.785152524	0.576286254	0.283236379	0.448697483
17:18:17.974	0.008558017	0.009242093	0.049918093	0.080743931	0.180426421	0.181019904	0.270032998	0.350777878	0.48307983	0.585958811	0.754353449	0.764710637	0.788145366	0.790926519	0.784126311	0.575520338	0.282890726	0.44812278
17:18:18.039	0.008574234	0.00904682	0.049893056	0.080654525	0.180164742	0.180902951	0.269596588	0.350379877	0.482379248	0.585190815	0.753392026	0.763759649	0.787136154	0.789931731	0.78316174	0.574837127	0.282579288	0.447584878
17:18:18.105	0.008600727	0.009354655	0.049772236	0.08051631	0.179881526	0.180600895	0.269153319	0.349876815	0.481710198	0.584394549	0.752405275	0.762762224	0.786099406	0.788899447	0.782176997	0.574129688	0.282248143	0.447053607
17:18:18.170	0.008598355	0.009169513	0.049692027	0.080299933	0.179554277	0.180142377	0.268750178	0.349419001	0.481087643	0.583674925	0.751557979	0.761890281	0.785225867	0.78802192	0.781346021	0.573562502	0.281964332	0.446606615
17:18:18.236	0.008635285	0.009052107	0.049655996	0.080201514	0.17928189	0.179985116	0.268323579	0.348961806	0.480393806	0.582926384	0.75056907	0.760896812	0.784207465	0.786975519	0.780349165	0.572859821	0.281593847	0.446054483
17:18:18.301	0.00860558	0.008763232	0.049614873	0.080015741	0.178969319	0.179848011	0.267993044	0.348514986	0.479701538	0.582084445	0.749484402	0.759809582	0.783118721	0.785898096	0.779291028	0.572099456	0.281240511	0.445465505
17:18:18.367	0.008580372	0.008672051	0.049567648	0.079914555	0.178667575	0.179663698	0.267747816	0.348057646	0.479076087	0.581387372	0.748572047	0.758913645	0.782212222	0.784967705	0.778404389	0.571483359	0.280927261	0.444985608
17:18:18.433	0.008519197	0.008561504	0.049480111	0.079754479	0.178394708	0.179406725	0.267309185	0.34748096	0.478306055	0.580480253	0.747362064	0.757694537	0.780978959	0.783730518	0.777170796	0.570589929	0.280482659	0.444266037
17:18:18.498	0.00853172	0.008675685	0.049389114	0.079675869	0.178082016	0.179150816	0.266871563	0.346900895	0.477517816	0.579513955	0.746094952	0.756390025	0.779642395	0.782386904	0.775833685	0.569612091	0.279987481	0.443514555
17:18:18.564	0.008555645	0.008548595	0.049326003	0.079464756	0.1777064	0.178753818	0.26645209	0.346346613	0.476764061	0.57855889	0.744895232	0.755189735	0.77837365	0.781115608	0.774610483	0.568737607	0.279552206	0.442830339
17:18:18.629	0.00848612	0.008369464	0.049292307	0.079332462	0.177436538	0.178321283	0.266000551	0.345850839	0.476056806	0.577683943	0.743826905	0.754123728	0.777292057	0.780025828	0.773536055	0.567970781	0.279185499	0.442238298
17:18:18.695	0.008357026	0.008470325	0.049227871	0.079289365	0.177071752	0.177846585	0.265584709	0.345412061	0.475360832	0.57684237	0.742798001	0.753094433	0.776220933	0.778967333	0.772498168	0.567243703	0.278803118	0.441669379
17:18:18.761	0.008379506	0.008369867	0.049074787	0.07915008	0.176827276	0.177559644	0.265176328	0.344932609	0.474713551	0.576101214	0.741861332	0.752193061	0.775273114	0.778041161	0.771609823	0.566632449	0.278486707	0.441187186
17:18:18.826	0.008427996	0.008360991	0.049049238	0.079057819	0.176607224	0.177307181	0.264762906	0.344542572	0.474134595	0.575418865	0.740974834	0.751320453	0.774418543	0.777128154	0.770764434	0.566047058	0.27819819	0.440740854
17:18:18.892	0.008454007	0.008274651	0.048920685	0.078942716	0.176392829	0.176984708	0.26451102	0.344043159	0.47346025	0.574663038	0.740024995	0.750392461	0.773452379	0.776142058	0.769828422	0.565397387	0.277878816	0.440224961
17:18:18.957	0.008504585	0.008354535	0.048885366	0.078863393	0.176195155	0.176737459	0.264206095	0.343606173	0.472841127	0.573893696	0.739068593	0.749472455	0.772487389	0.775206152	0.768905117	0.56478178	0.27755006	0.439732352
17:18:19.023	0.008418522	0.008246409	0.048788672	0.078755159	0.175936843	0.176346565	0.263917302	0.343041855	0.4722044	0.573077381	0.738128444	0.748520283	0.771509858	0.774250157	0.767955787	0.56411706	0.277203606	0.439241739
17:18:19.088	0.008463319	0.008075749	0.048764347	0.078617213	0.175673719	0.176076336	0.263623265	0.342579434	0.471557656	0.572301871	0.73714786	0.747578871	0.770540999	0.773304037	0.767018868	0.563469549	0.276857125	0.438733336
17:18:19.152	0.008434382	0.008251611	0.04869096	0.078530216	0.175404819	0.175927826	0.263290107	0.342116529	0.470898815	0.571478315	0.736124903	0.746525692	0.769464416	0.772215636	0.765970324	0.562720741	0.276477609	0.438167985
17:18:19.217	0.008421056	0.008043832	0.04857024	0.078349352	0.175240951	0.175666872	0.26285981	0.341614435	0.470257799	0.570676063	0.735144275	0.745549748	0.76847652	0.771231189	0.765024609	0.562060896	0.276172673	0.437643264
17:18:19.282	0.008364537	0.008284291	0.048445448	0.078225057	0.174954126	0.175376747	0.262542584	0.341160608	0.469602834	0.569922365	0.734155586	0.744559458	0.767494843	0.770209688	0.764038614	0.561343132	0.275818439	0.437115987
17:18:19.348	0.008350729	0.008478353	0.048339184	0.078137169	0.174712778	0.174976304	0.262061396	0.340619968	0.468880963	0.569025659	0.733016387	0.743427419	0.76631565	0.768980646	0.762877147	0.560507875	0.275400663	0.436477362
17:18:19.413	0.008318938	0.008488843	0.048255108	0.078027508	0.174412718	0.174695464	0.261661282	0.340168609	0.468169889	0.568218022	0.732022236	0.742429292	0.765297455	0.767925125	0.761886786	0.559798529	0.275061064	0.43594292
17:18:19.479	0.008363414	0.008322213	0.048172157	0.077867968	0.174180514	0.174527857	0.26133619	0.33971815	0.467542957	0.567444869	0.731114771	0.741511393	0.764347494	0.766959748	0.760988113	0.559165156	0.274763909	0.435449506
17:18:19.544	0.008281205	0.008203598	0.048101013	0.077803636	0.173966479	0.174311166	0.260953819	0.339252361	0.466925005	0.566704771	0.730195633	0.740604808	0.763445452	0.766059675	0.760089549	0.558527009	0.274454521	0.43495593
17:18:19.609	0.008391352	0.008316968	0.048022641	0.077630534	0.173712981	0.174270328	0.260692655	0.338765463	0.466230822	0.565869936	0.729164659	0.739566196	0.762390773	0.764981974	0.759041897	0.557774489	0.274089289	0.434370738
17:18:19.675	0.008465533	0.00816527	0.047919225	0.077493212	0.173501831	0.173881816	0.260308877	0.338250787	0.465575785	0.565093999	0.728122277	0.738554981	0.761337718	0.763936195	0.758033712	0.557051377	0.273744058	0.433816211
17:18:19.740	0.008402912	0.008144694	0.047853471	0.077350894	0.1731895	0.173559608	0.259997702	0.33779517	0.464916216	0.564298798	0.727130328	0.737549866	0.760332755	0.762948038	0.757064492	0.556348307	0.273404388	0.433263211
17:18:19.805	0.00842441	0.008089823	0.04771443	0.077197244	0.172950559	0.173332332	0.259679263	0.337248323	0.464190438	0.563449056	0.726061473	0.736484893	0.759220103	0.761882042	0.756000331	0.555578984	0.273029578	0.432663056
17:18:19.870	0.00841606	0.008497717	0.047649282	0.077072057	0.172711257	0.173155445	0.259311821	0.336761413	0.463526183	0.562636818	0.725050629	0.73544569	0.758165217	0.76088634	0.754981129	0.554873215	0.272684051	0.432131596
17:18:19.934	0.008400485	0.00861714	0.047558185	0.076955613	0.172425514	0.17279425	0.258833663	0.336232443	0.462827309	0.56184961	0.724040489	0.734398649	0.757116238	0.759852677	0.753972177	0.554135357	0.272324634	0.43157341
17:18:19.999	0.008400967	0.008941925	0.047481131	0.076839707	0.172223028	0.172597741	0.258311339	0.335754759	0.462156056	0.561052089	0.72299793	0.733344805	0.756020066	0.758776303	0.752917342	0.553377304	0.271958012	0.430971142
17:18:20.064	0.00838186	0.008836623	0.04740194	0.076730403	0.171976029	0.172344213	0.257939862	0.335333035	0.461483606	0.560289477	0.722029503	0.732375737	0.755044815	0.757774291	0.751966886	0.552695999	0.271649916	0.430464988
17:18:20.130	0.008299329	0.008751493	0.047307076	0.076598881	0.171818782	0.171966046	0.257546809	0.334890687	0.460840577	0.559572447	0.72112239	0.731478986	0.754139354	0.756877515	0.751106051	0.552097533	0.271367509	0.430014735
17:18:20.196	0.008167666	0.009034312	0.047262899	0.076479583	0.171511022	0.171700322	0.257248741	0.334435825	0.460174588	0.558787414	0.720137005	0.730491544	0.753111036	0.755867216	0.750120197	0.551382721	0.271008752	0.429488099
17:18:20.262	0.008212142	0.009145261	0.047187781	0.07629961	0.171328749	0.171311015	0.256891985	0.333948374	0.459467865	0.55792421	0.719075814	0.729410526	0.751975857	0.754755901	0.74903879	0.55062649	0.270638183	0.428901001
17:18:20.327	0.008176818	0.008963706	0.047089962	0.076119103	0.171062016	0.170907126	0.256593513	0.333575313	0.45894992	0.557356707	0.718362334	0.728682884	0.751264838	0.754040064	0.748398231	0.550208819	0.270436915	0.428575368
17:18:20.393	0.008238314	0.009032697	0.04702502	0.076009531	0.170918603	0.170553091	0.256326706	0.33312829	0.458394714	0.556660531	0.717539308	0.72782096	0.750395964	0.753168495	0.747556379	0.549647859	0.270160814	0.428134502
17:18:20.459	0.008196086	0.009119038	0.046956006	0.075928781	0.170704086	0.170286837	0.255971565	0.332707457	0.45781021	0.555980532	0.716705446	0.72698647	0.74957684	0.75234489	0.746790393	0.549116305	0.269901412	0.427734159
17:18:20.524	0.008146312	0.009318345	0.046885061	0.075818049	0.170385979	0.170179991	0.255673702	0.332275562	0.457175811	0.555255667	0.715840178	0.726109277	0.748691279	0.751434813	0.745965441	0.548542927	0.269620578	0.427303539
17:18:20.590	0.008045477	0.009262264	0.046815034	0.075754964	0.170123364	0.169841867	0.255341551	0.331817466	0.456548435	0.554529267	0.714938571	0.7252214	0.747768439	0.750505816	0.745088817	0.547939569	0.269330531	0.426855842
17:18:20.655	0.008059286	0.009100479	0.046691573	0.075586501	0.169820055	0.169737649	0.255002545	0.331331604	0.455842408	0.553681761	0.713901386	0.724160568	0.746718459	0.749401866	0.744040038	0.54718958	0.268974231	0.426267271
17:18:20.721	0.008116125	0.009111821	0.046645259	0.075492901	0.169554644	0.169430022	0.254712542	0.330878397	0.455182122	0.552926771	0.712944499	0.723215421	0.745719231	0.748420754	0.743073151	0.546515159	0.268644309	0.425759645
17:18:20.787	0.008056413	0.009123925	0.046576351	0.075438739	0.169244598	0.169301668	0.25436325	0.3304234	0.454545782	0.552196749	0.711983517	0.722272382	0.744758318	0.747432417	0.742128923	0.545846777	0.268324542	0.425266927
17:18:20.853	0.007998931	0.008683754	0.046548359	0.075320869	0.168971849	0.168865957	0.25387662	0.329970463	0.453887534	0.551423977	0.711012535	0.721292038	0.743753493	0.746379422	0.74114346	0.545134732	0.267959759	0.424710864
17:18:20.919	0.007909818	0.008808826	0.046404227	0.075249835	0.168790901	0.168642661	0.253590047	0.329575064	0.453253888	0.550680775	0.710056045	0.720359166	0.74280564	0.745392922	0.740232705	0.54448739	0.267679431	0.424209717
17:18:20.985	0.007995239	0.008770496	0.046344775	0.075182111	0.168451257	0.168372692	0.253319205	0.329153398	0.452616408	0.549988311	0.709125014	0.719436461	0.741898278	0.7444515	0.739367896	0.543885786	0.267381925	0.423747546
17:18:21.051	0.007997648	0.008906057	0.046254084	0.075029353	0.16827187	0.168183874	0.252993309	0.328711872	0.451998265	0.549217486	0.708196759	0.718491092	0.740950079	0.743500803	0.73847484	0.543254387	0.267072326	0.423244411
17:18:21.116	0.007970673	0.00878139	0.046198613	0.074874721	0.167964108	0.168030441	0.25267084	0.328200631	0.451301187	0.54838437	0.70711905	0.717409852	0.739856775	0.742421963	0.737386079	0.542459284	0.26667465	0.422626756
17:18:21.182	0.008047744	0.008627273	0.046077694	0.074803874	0.167670304	0.167795744	0.252381042	0.327714972	0.450638687	0.547588856	0.706169299	0.716444814	0.738867117	0.741425856	0.736440834	0.541796554	0.266350009	0.422116383
17:18:21.247	0.008049992	0.008488082	0.045980794	0.074765508	0.167377102	0.167588894	0.251990408	0.327249386	0.450012292	0.546876435	0.70525113	0.715547583	0.737949045	0.740506765	0.735542645	0.541174165	0.266040073	0.42162109
17:18:21.312	0.008165277	0.008623643	0.045981712	0.074657096	0.167057913	0.167483877	0.25154472	0.326734777	0.449242446	0.545935889	0.704092595	0.714384598	0.736762665	0.739329562	0.734352321	0.540298804	0.265619236	0.420950074
17:18:21.378	0.008059145	0.008796723	0.045914228	0.074513707	0.166724768	0.16716856	0.251101246	0.32621742	0.448505485	0.545043951	0.702969121	0.713286795	0.735613494	0.738195235	0.73322752	0.539481869	0.265218905	0.420331172
17:18:21.444	0.008072953	0.008617991	0.045811524	0.074361128	0.166375262	0.166807364	0.250753771	0.325665415	0.447794286	0.544170647	0.701852518	0.712194094	0.734461594	0.737051863	0.732072923	0.538665676	0.264819614	0.419697733
17:18:21.509	0.008129471	0.008425946	0.045659965	0.074232461	0.166079174	0.166362103	0.25033107	0.325193915	0.44710851	0.543356416	0.700800533	0.711110931	0.733359479	0.735961581	0.730999544	0.53789998	0.264444648	0.419106144
17:18:21.575	0.008088687	0.008494534	0.045532523	0.074065424	0.16581446	0.166246214	0.249927328	0.324779277	0.446476944	0.542648079	0.699851003	0.710171145	0.732391899	0.734999756	0.730087882	0.53726136	0.264123828	0.418604554
17:18:21.640	0.00813493	0.00860266	0.045531911	0.0739712	0.165593326	0.165957949	0.249569769	0.324375013	0.445890268	0.541942845	0.698991593	0.709305488	0.731490548	0.734124793	0.729236624	0.536652923	0.263813751	0.418149403
17:18:21.706	0.008042767	0.008427515	0.045446005	0.073853062	0.165384945	0.165678699	0.249292272	0.323900494	0.445214731	0.541141657	0.697964451	0.708284105	0.730466687	0.73306031	0.728234621	0.535929709	0.263475318	0.417598698
17:18:21.770	0.008025908	0.008471492	0.045385543	0.073648016	0.165172593	0.165287536	0.248921404	0.323459723	0.444588702	0.540343543	0.697029104	0.70735578	0.729526296	0.732104127	0.727322207	0.535282181	0.263157067	0.417095129
17:18:21.836	0.007943538	0.008607456	0.045299437	0.073484104	0.164934856	0.16504833	0.248656972	0.322978051	0.443916288	0.539570398	0.696045789	0.706386158	0.728528174	0.731093469	0.726364521	0.534608502	0.262832636	0.416580691
17:18:21.900	0.008051438	0.008362558	0.045306971	0.073328589	0.164716489	0.164893723	0.248178613	0.322533022	0.443257225	0.53876791	0.69507234	0.705423043	0.727512086	0.730114551	0.725382376	0.533934756	0.262488627	0.416059476
17:18:21.966	0.007949158	0.008187414	0.045291098	0.073174224	0.164456976	0.164597237	0.247829119	0.322102851	0.442622919	0.537954006	0.694133557	0.704502778	0.726532517	0.729137815	0.724450213	0.533285	0.262167174	0.415562069
17:18:22.032	0.00783612	0.00806436	0.045202643	0.073088476	0.164138028	0.164334694	0.247448162	0.32167928	0.442009023	0.53725421	0.693223053	0.703588799	0.725607259	0.728201939	0.723531572	0.532649637	0.261846873	0.415085017
17:18:22.097	0.007940809	0.007974792	0.045194903	0.073062243	0.163910878	0.164191636	0.247121457	0.321273091	0.441410342	0.536569214	0.692348888	0.702723141	0.724699759	0.727272229	0.722696808	0.532084256	0.261568679	0.4146466
17:18:22.163	0.007910141	0.007873928	0.045118667	0.072912341	0.16372283	0.16397126	0.246637652	0.320855006	0.44079094	0.535806648	0.691351301	0.701735809	0.723727721	0.726282477	0.721719029	0.531402546	0.261251693	0.414116901
17:18:22.229	0.007837244	0.007926781	0.045075002	0.072832303	0.163514208	0.163875524	0.246101011	0.320435828	0.440180699	0.535049886	0.690419874	0.700820499	0.722784497	0.725324736	0.720840558	0.530785133	0.260940872	0.413648686
17:18:22.294	0.007709757	0.007923956	0.044979526	0.072751284	0.163312443	0.16361139	0.245936044	0.319982689	0.439578364	0.53436416	0.68953941	0.699955026	0.72189365	0.724413805	0.719999363	0.530199726	0.260652861	0.41319593
17:18:22.359	0.007739301	0.007805342	0.044874181	0.072614765	0.163098046	0.163542436	0.245858806	0.319609706	0.439054402	0.53375799	0.688749375	0.699212596	0.721117126	0.723653368	0.719304862	0.529726835	0.260424176	0.412847891
17:18:22.425	0.007722603	0.007804132	0.044832858	0.072501712	0.162883888	0.163381729	0.245395368	0.319266777	0.438457992	0.533095469	0.687878161	0.698342649	0.720243104	0.722785321	0.718488314	0.529163664	0.260156741	0.412402101
17:18:22.489	0.007688563	0.008003439	0.044808533	0.072370548	0.162706668	0.163196356	0.245046277	0.318838915	0.437883949	0.532406579	0.687013025	0.697512854	0.719393611	0.721909353	0.717676289	0.528595972	0.259886624	0.411962662
17:18:22.554	0.007704299	0.00798488	0.044814031	0.072318589	0.162518741	0.162777612	0.244567511	0.318357175	0.437294155	0.53165568	0.6861134	0.696600058	0.718480065	0.720983758	0.716785283	0.52797014	0.259573471	0.411487825
17:18:22.619	0.007545821	0.008206377	0.044704612	0.072181892	0.16224924	0.162560947	0.244148237	0.31788162	0.436656669	0.530878405	0.68515647	0.695625112	0.71749141	0.720000637	0.715828739	0.527304222	0.259243549	0.410971679
17:18:22.684	0.007609083	0.00818459	0.044639058	0.072061881	0.161990327	0.162349439	0.24362087	0.317411494	0.436078368	0.530139242	0.684243939	0.694699412	0.716554094	0.719057305	0.714918501	0.526677767	0.258921661	0.410484689
17:18:22.750	0.007519649	0.00817289	0.044578296	0.071969531	0.161673305	0.1620145	0.243338731	0.316986065	0.43544192	0.529378304	0.68329617	0.693727793	0.715566544	0.718079212	0.713949595	0.52599631	0.258571598	0.409958035
17:18:22.815	0.007537632	0.007973583	0.0444477	0.071836671	0.161400435	0.161903118	0.242767039	0.316600579	0.434866582	0.528654223	0.682364039	0.692834407	0.714671585	0.717180472	0.713084676	0.525400257	0.258281747	0.409500644
17:18:22.881	0.007471158	0.008015542	0.044359252	0.071737717	0.161092676	0.161616442	0.242572021	0.316166206	0.434306824	0.527986226	0.681524583	0.692015334	0.713857194	0.716339723	0.712323745	0.52483852	0.257997078	0.409100852
17:18:22.946	0.007455584	0.007932071	0.044271003	0.071598343	0.16085181	0.161447246	0.24223624	0.315759261	0.433735707	0.527320085	0.680650681	0.691144833	0.712983449	0.71546972	0.711483035	0.52424029	0.25770328	0.408651312
17:18:23.012	0.007464576	0.008084578	0.04425167	0.071470122	0.160641103	0.161219445	0.241881905	0.315259364	0.433046969	0.526515513	0.679627107	0.690143009	0.711908731	0.714405874	0.710463129	0.523503731	0.257350914	0.408090876
17:18:23.077	0.007425398	0.008264115	0.044132175	0.071299608	0.160302303	0.160846053	0.241601584	0.314839984	0.432442152	0.525770737	0.678747568	0.689279422	0.711008038	0.713532515	0.709598883	0.522898432	0.257054841	0.407632419
17:18:23.142	0.007409021	0.008381521	0.044146624	0.071193516	0.159940883	0.16067076	0.241299683	0.314419083	0.431842877	0.525102359	0.67791397	0.688455875	0.710133428	0.712679739	0.708774635	0.522334216	0.256758051	0.407198293
17:18:23.207	0.007359246	0.008288323	0.044075479	0.071018362	0.159621935	0.16017299	0.24124604	0.313945105	0.431205959	0.524372894	0.677043329	0.687572508	0.70923885	0.711788912	0.707882832	0.521705567	0.256453452	0.406722724
17:18:23.272	0.007311237	0.008335841	0.043974306	0.070909593	0.159381188	0.160017319	0.240772114	0.313495119	0.430602716	0.523606289	0.676094107	0.686618636	0.708268056	0.7108295	0.706929762	0.521040222	0.256134008	0.406221513
17:18:23.337	0.007226137	0.008218436	0.043948657	0.070820454	0.159139599	0.159789787	0.239996288	0.313108259	0.429989012	0.522842195	0.675125548	0.685636036	0.707293289	0.709827263	0.705943564	0.520344745	0.255780125	0.405694118
17:18:23.401	0.007133812	0.008052616	0.043868348	0.07070669	0.158902101	0.159388814	0.239767191	0.312696775	0.429373486	0.522141136	0.674263627	0.684771932	0.706407036	0.708931349	0.705094701	0.519738603	0.255491748	0.405250731
17:18:23.467	0.007052085	0.007831925	0.043821422	0.070598991	0.158622855	0.159299447	0.239540314	0.312277541	0.428732847	0.521388184	0.673331804	0.683835954	0.705420177	0.707956508	0.704119817	0.519055611	0.255152331	0.404716073
17:18:23.533	0.007060274	0.00763867	0.043760859	0.070469729	0.158311123	0.159164463	0.239248812	0.311806447	0.428011167	0.520555372	0.672259777	0.682766027	0.704303414	0.706839752	0.703023496	0.518253455	0.254770175	0.404090196
17:18:23.598	0.00711888	0.007378442	0.043679632	0.070418958	0.158051126	0.158791862	0.238928966	0.31135654	0.427369429	0.519851256	0.671296284	0.681844801	0.703382889	0.705889737	0.702138719	0.517620201	0.254459972	0.403606477
17:18:23.664	0.007070872	0.007591062	0.043569295	0.070294842	0.157811585	0.158476957	0.23858794	0.310929309	0.426739029	0.519141846	0.670394368	0.680960695	0.702464678	0.704974257	0.701271672	0.517004357	0.254161203	0.403145291
17:18:23.730	0.00706461	0.007503109	0.043527866	0.070237111	0.157685858	0.158357884	0.238120471	0.310455748	0.426109321	0.518390849	0.669410965	0.679972808	0.701436153	0.703957746	0.700301514	0.516323761	0.253842517	0.402622667
17:18:23.795	0.00714136	0.007679419	0.043484201	0.070151632	0.15747447	0.158201418	0.237902668	0.309962868	0.42541775	0.517574534	0.668421176	0.678912975	0.700332207	0.702890559	0.699229935	0.51554256	0.253469897	0.402019233
17:18:23.861	0.007013551	0.007434119	0.043362364	0.070026713	0.15720485	0.158009684	0.237290602	0.309502024	0.424720052	0.516747997	0.667387497	0.677864381	0.699254829	0.701804945	0.698145054	0.514796755	0.253111435	0.40141785
17:18:23.926	0.007019813	0.007563628	0.043287046	0.069897066	0.156992496	0.157685351	0.236930419	0.30901926	0.424055668	0.515948993	0.666370992	0.676844329	0.698239329	0.700753591	0.697139576	0.514081032	0.252785221	0.400847458
17:18:23.992	0.006962652	0.007256194	0.043212534	0.069789636	0.156744692	0.157394696	0.236527282	0.30857155	0.423469373	0.515222637	0.665474045	0.675927096	0.697325161	0.699863581	0.696242044	0.513456466	0.252470299	0.400348731
17:18:24.058	0.006924276	0.00728363	0.043168257	0.069702727	0.156523677	0.157149919	0.236237481	0.308132018	0.422861589	0.51448514	0.664553278	0.67500258	0.696384978	0.698894547	0.69533647	0.512807251	0.252143944	0.399852128
17:18:24.124	0.006981598	0.007414756	0.043015685	0.069622958	0.156379665	0.156622712	0.235902304	0.307675961	0.42222369	0.513704572	0.663549186	0.674009591	0.695379186	0.697894274	0.694355357	0.512103507	0.251809373	0.399304883
17:18:24.190	0.007038919	0.007511989	0.042941786	0.069526382	0.156151311	0.156539441	0.235419907	0.30723849	0.42162952	0.5129824	0.662573909	0.673029506	0.694397267	0.696905203	0.693423664	0.511440507	0.251493341	0.398793932
17:18:24.256	0.007078258	0.007527814	0.042829106	0.069425198	0.155847281	0.156084369	0.235017173	0.306784529	0.421017266	0.512265704	0.661632369	0.67211549	0.693441744	0.695976161	0.692529982	0.510827178	0.251173883	0.398315725
17:18:24.322	0.007117596	0.0078881	0.042714083	0.0693233	0.155582113	0.1558921	0.234859469	0.306273221	0.420356912	0.511505838	0.660653353	0.671144906	0.69243571	0.694980684	0.691584643	0.510164533	0.250838722	0.397785113
17:18:24.388	0.007071996	0.008176167	0.042660748	0.069243084	0.155385283	0.155827921	0.234518645	0.30575449	0.419746609	0.510741888	0.65968497	0.670180201	0.691452271	0.69399267	0.690630948	0.509505043	0.250495765	0.397263122
17:18:24.453	0.007199645	0.008367405	0.042607207	0.069165724	0.155196994	0.155499343	0.234152412	0.305281413	0.419130954	0.510018362	0.658736937	0.669256239	0.690526322	0.693042796	0.689745138	0.508873002	0.250178189	0.39678954
17:18:24.519	0.007157096	0.008575992	0.042486561	0.0690864	0.155035655	0.155143718	0.233895375	0.304925416	0.418634427	0.509436423	0.657977251	0.668516655	0.689785797	0.692277789	0.689051685	0.508420408	0.249945755	0.396452306
17:18:24.584	0.007199645	0.008346875	0.042393221	0.068949168	0.154816325	0.154806924	0.23359771	0.304540606	0.418083376	0.508757968	0.657159	0.667688561	0.688923246	0.691418201	0.688236185	0.507848582	0.249675159	0.39601809
17:18:24.650	0.007184552	0.007803016	0.042371239	0.068923827	0.154542852	0.154670349	0.233252653	0.304137109	0.417480287	0.508010728	0.656225784	0.666753286	0.687968137	0.690463322	0.68730238	0.507189969	0.249350476	0.39549824
17:18:24.715	0.007250633	0.007608146	0.042331647	0.068780528	0.154301747	0.154540935	0.233018514	0.303663547	0.416893141	0.507339285	0.655383795	0.665914026	0.687105309	0.68960405	0.686472906	0.506599669	0.249068645	0.395036268
17:18:24.781	0.007161681	0.007742494	0.042231592	0.068732433	0.154129458	0.154205201	0.232659947	0.30319466	0.416334658	0.506681777	0.654521496	0.665068592	0.686238819	0.688725617	0.685657563	0.506028856	0.248769173	0.39460001
17:18:24.846	0.007213382	0.007995461	0.04221154	0.068600554	0.153849733	0.153993841	0.232526846	0.302793844	0.415808585	0.506065354	0.653697003	0.664241607	0.685420352	0.687883264	0.684895646	0.505473935	0.248488381	0.394172932
17:18:24.911	0.00718721	0.007843762	0.042103139	0.068521944	0.153646405	0.153846395	0.232190059	0.30237666	0.415246634	0.505370896	0.652827401	0.6633497	0.684502383	0.687000253	0.684015453	0.504860234	0.248173459	0.393715803
17:18:24.977	0.007249349	0.008132636	0.041938149	0.068415941	0.153332269	0.153630264	0.231822416	0.301966967	0.414647498	0.50463238	0.651904079	0.662439047	0.683579682	0.686051383	0.683119581	0.504199648	0.247878003	0.393221124
17:18:25.041	0.007266208	0.007976902	0.041784659	0.068256491	0.153115346	0.153422354	0.231338409	0.301448788	0.414000563	0.503852222	0.650879531	0.661412637	0.682556166	0.684999609	0.682109799	0.503478155	0.247526339	0.392644868
17:18:25.107	0.00723281	0.007702549	0.041703639	0.068142993	0.152926936	0.153200119	0.230981656	0.301021872	0.413412441	0.503124148	0.650019095	0.660525794	0.6816487	0.684086827	0.681254426	0.502867541	0.247228131	0.392174087
17:18:25.171	0.007312129	0.0075335	0.041657125	0.068047192	0.152732272	0.153030396	0.230606753	0.30057967	0.412794959	0.502367393	0.64910645	0.659632519	0.680708068	0.683155155	0.680338445	0.502218022	0.246908364	0.391668277
17:18:25.237	0.00731245	0.007397939	0.041630557	0.067904071	0.152557941	0.152836538	0.230367773	0.300159242	0.412151048	0.501612114	0.648160981	0.658676539	0.679721036	0.682153009	0.679377426	0.501505235	0.246566938	0.391116668
17:18:25.301	0.007247421	0.006904512	0.041581295	0.0677365	0.152332596	0.152524666	0.229921388	0.299729409	0.4115284	0.500865048	0.647266047	0.65777598	0.678782269	0.681243576	0.678447892	0.500837023	0.246242382	0.390609015
17:18:25.367	0.007316304	0.006813331	0.041531015	0.0675965	0.152072961	0.152166121	0.229403501	0.299279919	0.410879984	0.500105274	0.646293959	0.656790571	0.677761033	0.68021632	0.67744013	0.500104732	0.245892571	0.390051118
17:18:25.433	0.007150601	0.006598692	0.041456609	0.067503078	0.151864581	0.152028221	0.229046143	0.298861294	0.4102929	0.499413928	0.645447473	0.655917039	0.676879929	0.679337977	0.676611376	0.499539098	0.245628577	0.389608463
17:18:25.498	0.007074011	0.006500249	0.041401171	0.06737343	0.151605561	0.151772573	0.228728716	0.298402038	0.4096402	0.498596685	0.644473589	0.654915843	0.675848605	0.678322013	0.675620389	0.498815024	0.245276787	0.389053539
17:18:25.564	0.007144499	0.006849196	0.041380713	0.067244496	0.151405723	0.151612927	0.228244102	0.297874374	0.408988506	0.497773365	0.643448566	0.653912428	0.674786083	0.677287714	0.674564224	0.49806296	0.244911513	0.388460387
17:18:25.630	0.007117685	0.007235304	0.041315465	0.067114134	0.151257378	0.15137372	0.227986569	0.297425053	0.408366271	0.497040599	0.642491018	0.652938295	0.673816879	0.676304061	0.673623345	0.497387897	0.244564441	0.387942371
17:18:25.695	0.007106998	0.007439857	0.041165835	0.067058367	0.150947933	0.151047002	0.227479774	0.297047813	0.407689821	0.496195778	0.64144901	0.651893177	0.672756603	0.675187897	0.672572047	0.496638415	0.244182791	0.387365274
17:18:25.761	0.007184069	0.007363203	0.041159014	0.06692988	0.150605403	0.150853143	0.227180496	0.296653518	0.407060273	0.495440415	0.640525208	0.651001713	0.671827475	0.674225495	0.671678709	0.496007033	0.243902097	0.386882242
17:18:25.827	0.007151153	0.007248666	0.041106085	0.066863663	0.150456335	0.150539151	0.226825154	0.29623166	0.406443136	0.494739363	0.639691866	0.650158793	0.670935799	0.67333595	0.670823681	0.49543767	0.243617794	0.386461524
17:18:25.893	0.00714457	0.007385841	0.04104847	0.066730535	0.150176728	0.150315061	0.226495221	0.295733486	0.40576873	0.493948109	0.638685606	0.649136856	0.669869511	0.672265832	0.669793399	0.494705801	0.243258952	0.385887273
17:18:25.958	0.0070736	0.007154257	0.04105468	0.06667459	0.149951863	0.149990198	0.226195134	0.295263428	0.405160553	0.493267616	0.637810489	0.648248978	0.668989374	0.671336438	0.66895017	0.494140117	0.242957556	0.385435367
17:18:26.024	0.007110691	0.007439097	0.041038288	0.066564661	0.149722307	0.149720229	0.225745811	0.29484906	0.404518784	0.492546509	0.636870204	0.647313925	0.66801091	0.670407058	0.668012155	0.493476628	0.242623743	0.384932385
17:18:26.089	0.007040846	0.007352354	0.041030448	0.066477039	0.149411056	0.149552362	0.225385833	0.294365947	0.403851747	0.491756928	0.635829293	0.646263076	0.666957337	0.669334341	0.666953908	0.49273025	0.242236095	0.384349388
17:18:26.154	0.006992516	0.007493968	0.040884485	0.066326155	0.149090543	0.149136802	0.224880852	0.293902354	0.403231427	0.490989996	0.634858091	0.645262804	0.66594657	0.668316503	0.66598796	0.492050514	0.241895288	0.383823755
17:18:26.220	0.007057545	0.007254315	0.040844893	0.06620195	0.148757037	0.148810879	0.224466824	0.293405419	0.402610631	0.490225765	0.63389321	0.64427037	0.664950244	0.667291578	0.665016362	0.491358681	0.241578259	0.383298376
17:18:26.285	0.007141359	0.007474602	0.040729059	0.066116025	0.148504982	0.148644072	0.224252943	0.292950692	0.402059864	0.489557441	0.633033475	0.643392882	0.664076533	0.666379613	0.664194947	0.490777627	0.24132053	0.382852405
17:18:26.351	0.007148424	0.007482268	0.040611447	0.0660392	0.148220804	0.148382593	0.223962336	0.292499952	0.401431513	0.488773716	0.632063189	0.642408064	0.663092058	0.665370378	0.663241611	0.490096879	0.240994119	0.382316897
17:18:26.416	0.007253825	0.007351548	0.0405689	0.065893848	0.148016272	0.147995145	0.223425288	0.292039592	0.400729264	0.48790531	0.630932108	0.641282162	0.661940227	0.664205088	0.662085246	0.489259512	0.240571793	0.38166948
17:18:26.482	0.007313556	0.007290626	0.040473731	0.065766431	0.147701881	0.147825423	0.223031224	0.291576337	0.400128947	0.487199285	0.630009918	0.64034441	0.66099721	0.663273648	0.661163036	0.488612457	0.240264905	0.381173157
17:18:26.547	0.007229419	0.00718169	0.040390068	0.065723423	0.1474858	0.147623344	0.222860006	0.291168908	0.399517673	0.486520047	0.629110451	0.639399004	0.660063453	0.662309733	0.660248901	0.487965013	0.239940432	0.380679834
17:18:26.613	0.007224602	0.007094947	0.040317905	0.065573521	0.147184417	0.147245972	0.222412705	0.290721638	0.398893699	0.485750187	0.628169043	0.638459809	0.659079185	0.661343884	0.659302342	0.487313452	0.239639246	0.380167464
17:18:26.677	0.007234718	0.007103016	0.040270779	0.065459309	0.146968937	0.147110988	0.222177961	0.290293584	0.398369267	0.485132692	0.627332481	0.637671497	0.658273224	0.660557558	0.658542537	0.486792494	0.2393875	0.379763516
17:18:26.743	0.007094866	0.006731837	0.040160242	0.065258279	0.146770902	0.146737596	0.221826452	0.289859695	0.397749045	0.48436335	0.626361847	0.636683574	0.657282807	0.659544936	0.657567716	0.48608848	0.239032395	0.379215368
17:18:26.807	0.007113653	0.006721705	0.040029447	0.065118291	0.146505612	0.146458611	0.221474536	0.289345639	0.39708047	0.483488121	0.625241069	0.635555934	0.656141479	0.658409515	0.656436936	0.485254977	0.238647359	0.378561455
17:18:26.872	0.007122162	0.006722916	0.040034844	0.065010681	0.146232021	0.146203493	0.221049823	0.288895856	0.396485732	0.482784788	0.624364829	0.6347149	0.655288739	0.657553449	0.65561632	0.48466164	0.238358898	0.378125513
17:18:26.937	0.007129548	0.006609948	0.039996264	0.064828032	0.146039161	0.146054983	0.220673106	0.288434472	0.395813973	0.481906647	0.623276761	0.633634325	0.654145753	0.656453988	0.65448058	0.483828374	0.237937682	0.37750485
17:18:27.002	0.007075438	0.006381995	0.039944459	0.064755758	0.145826928	0.145835137	0.220327758	0.288041416	0.395214353	0.481174725	0.622368683	0.632700196	0.653205466	0.655475213	0.653551203	0.483180761	0.23765505	0.377006927
17:18:27.068	0.007069818	0.006348508	0.039888575	0.064619865	0.145522779	0.14565719	0.219985725	0.287592602	0.394579912	0.480408782	0.621371621	0.631730056	0.652204165	0.654443798	0.652577758	0.482478097	0.237333991	0.376471501
17:18:27.133	0.007032406	0.006227875	0.039892955	0.064521268	0.1453535	0.145403397	0.219815716	0.28711752	0.393931532	0.479688648	0.620430825	0.630778809	0.651226979	0.65344701	0.651604971	0.481773898	0.23700581	0.375933544
17:18:27.199	0.00690556	0.006276693	0.039851832	0.064462467	0.145293463	0.145354069	0.219421451	0.286765793	0.393332856	0.47896764	0.619554017	0.629912005	0.650335096	0.652599404	0.650738988	0.481166	0.23670565	0.375464308
17:18:27.264	0.006848239	0.006022112	0.039845829	0.064366992	0.145084601	0.14509763	0.219108663	0.286342763	0.392621534	0.478134015	0.618475841	0.628810727	0.649209384	0.65149777	0.649619461	0.480355578	0.236291049	0.374831077
17:18:27.330	0.006870558	0.005908741	0.039834069	0.064227173	0.144916284	0.145019486	0.218817051	0.285941462	0.392069889	0.477488013	0.617626774	0.627982854	0.648363174	0.650653956	0.648811363	0.479803779	0.236015327	0.3744258
17:18:27.396	0.006859086	0.006165742	0.039798344	0.064112961	0.144648466	0.144694889	0.218527452	0.285464938	0.391485132	0.476795085	0.616714393	0.62709335	0.647428173	0.649744014	0.647915522	0.479168314	0.235721684	0.373936379
17:18:27.461	0.006950768	0.006138307	0.039722101	0.063998928	0.144419513	0.144301606	0.218163436	0.284989316	0.390792332	0.475964563	0.615667703	0.626077069	0.646364511	0.648656662	0.646888746	0.478430742	0.23535898	0.373355452
17:18:27.527	0.006931019	0.00597047	0.039663163	0.063835938	0.144080954	0.143936165	0.217806481	0.284537765	0.390166815	0.475217877	0.614720643	0.625156028	0.645378066	0.647681319	0.645956442	0.477786892	0.235045364	0.372845875
17:18:27.592	0.006980633	0.005859116	0.039585909	0.063755276	0.143926954	0.143746817	0.217425525	0.284071897	0.389575318	0.474522873	0.613820256	0.624276284	0.644447073	0.646730591	0.645050508	0.477147226	0.234737282	0.372357123
17:18:27.658	0.006838213	0.005945859	0.03959894	0.063593683	0.143755148	0.143330197	0.217104063	0.283587747	0.388888376	0.473715936	0.612829	0.623263923	0.643376432	0.645638114	0.644019757	0.476401843	0.234376798	0.371790236
17:18:27.724	0.006894731	0.00611168	0.039526058	0.063559419	0.143513561	0.143189377	0.216678134	0.283153092	0.38829146	0.473025745	0.611928424	0.622366765	0.642451554	0.644751349	0.643142913	0.475793204	0.234092972	0.371325599
17:18:27.789	0.006906453	0.006250872	0.03954458	0.063454219	0.143283404	0.142902172	0.216375027	0.282717751	0.387660306	0.47227312	0.610974832	0.62139962	0.641463313	0.643769419	0.642183412	0.475116269	0.233756547	0.370809435
17:18:27.855	0.006873537	0.006091103	0.039398717	0.06336294	0.142999947	0.142632468	0.215997299	0.282310468	0.387068463	0.47155234	0.610054681	0.620468818	0.640511417	0.642805189	0.641249512	0.474470984	0.233408127	0.370296144
17:18:27.920	0.00706509	0.006210123	0.03929958	0.063235969	0.142732011	0.142267032	0.215646798	0.281842201	0.386457474	0.470851099	0.609109912	0.619515649	0.639529464	0.641800989	0.640294909	0.473803835	0.233089132	0.369764882
17:18:27.986	0.007031533	0.006204071	0.039185676	0.063070093	0.142447673	0.14202809	0.215334099	0.281309998	0.38580512	0.47001761	0.608078523	0.618502474	0.638461622	0.640734349	0.639248149	0.473033566	0.23270088	0.369185301
17:18:28.052	0.007080469	0.006426375	0.039100995	0.062915907	0.14227695	0.141674585	0.215089674	0.28090409	0.385193696	0.469291947	0.607180339	0.617591008	0.637518191	0.639773767	0.638342199	0.472395081	0.232387868	0.368697751
17:18:28.117	0.007044502	0.006512311	0.039034336	0.062850414	0.142031632	0.141298539	0.214689157	0.280437546	0.384613187	0.468574141	0.606244983	0.616663238	0.636579769	0.63884776	0.637438909	0.471771713	0.232048185	0.368203777
17:18:28.183	0.007076133	0.006806027	0.038917796	0.062717196	0.141675747	0.141079223	0.214415292	0.279916889	0.384000649	0.467845139	0.605274781	0.615697202	0.635605313	0.637867614	0.636469533	0.471096634	0.231693431	0.367690287
17:18:28.248	0.007110012	0.007113864	0.038818453	0.062605215	0.141531012	0.14088616	0.214012353	0.279520127	0.3834508	0.4671808	0.604453411	0.614862749	0.634751434	0.637011458	0.635664832	0.470539317	0.231423032	0.367273437
17:18:28.314	0.007075009	0.007138071	0.038713613	0.062492788	0.141239613	0.140675773	0.213638051	0.27907289	0.382794601	0.466396186	0.603459604	0.613874974	0.633716586	0.636003542	0.634654158	0.469823038	0.231067716	0.366717356
17:18:28.378	0.006991837	0.007079973	0.038639314	0.062386875	0.141039412	0.140414555	0.213355113	0.27867757	0.38222881	0.465715	0.602618205	0.613031536	0.632854656	0.635151957	0.633839066	0.469259344	0.230769424	0.36629409
17:18:28.443	0.006859693	0.007241849	0.038602264	0.062285779	0.140901893	0.140388034	0.213059668	0.278291048	0.381719655	0.465100897	0.601867862	0.612283745	0.63208587	0.634370157	0.633107054	0.468750044	0.230531371	0.365924041
17:18:28.507	0.006884741	0.007293087	0.038526841	0.062157441	0.140701574	0.140222287	0.212770475	0.277914562	0.381170998	0.464424541	0.601049817	0.611455946	0.631270029	0.633569197	0.632328501	0.46818328	0.230265706	0.365504444
17:18:28.573	0.006809275	0.007313261	0.038477372	0.062056793	0.140437247	0.140009072	0.21250871	0.277512641	0.38057771	0.463715968	0.600193337	0.6105694	0.630370233	0.632683354	0.631478606	0.467578572	0.229956992	0.3650526
17:18:28.639	0.006879763	0.007358045	0.038388006	0.061933659	0.140057903	0.139786836	0.212215482	0.277155136	0.380029399	0.463067974	0.599327148	0.6096857	0.629507854	0.631813096	0.630626018	0.466976445	0.22966672	0.364572594
17:18:28.703	0.006866597	0.007610608	0.038312482	0.061839168	0.139843746	0.139489286	0.211862962	0.276688727	0.379430125	0.462306937	0.598402892	0.608742919	0.628559794	0.630837026	0.629699192	0.466305937	0.229318497	0.36405596
17:18:28.769	0.006757735	0.007585593	0.038255992	0.061728079	0.139629108	0.139309483	0.211544342	0.276231319	0.378882314	0.461663719	0.597541192	0.607884471	0.627669672	0.629973407	0.62884529	0.465695813	0.229025598	0.36359351
17:18:28.835	0.006826777	0.007752624	0.038177008	0.06159834	0.139458625	0.139124379	0.211241634	0.275810801	0.37823749	0.460878976	0.596567576	0.606878617	0.626638003	0.62892493	0.627857558	0.464965446	0.228702796	0.36303255
17:18:28.900	0.006767047	0.007883344	0.038107081	0.06153249	0.13923376	0.139068803	0.210926021	0.275399182	0.377639346	0.46015977	0.595724134	0.606035068	0.625778802	0.628047906	0.627046456	0.464391545	0.228448213	0.362601433
17:18:28.966	0.006745371	0.00784663	0.038067589	0.061475741	0.139074506	0.138922948	0.210612827	0.275060645	0.377135511	0.459569799	0.595008733	0.605281177	0.625033856	0.627285416	0.626344803	0.46392358	0.228218953	0.362237853
17:18:29.032	0.006702697	0.007670723	0.03794697	0.061463071	0.138876351	0.138843657	0.210239133	0.274672332	0.376623331	0.458965074	0.594250082	0.604523846	0.624247243	0.626531978	0.625600162	0.463404124	0.22797347	0.361851026
17:18:29.097	0.006627071	0.007722769	0.037850562	0.061296285	0.138574726	0.138773912	0.209929372	0.274315581	0.376018323	0.458245822	0.59336265	0.603643215	0.623310203	0.625614078	0.624716386	0.462770683	0.227684139	0.361373071
17:18:29.163	0.0066237	0.00775666	0.0377505	0.061173508	0.138437089	0.138483791	0.209557492	0.273950089	0.375413274	0.457544862	0.592503584	0.602786246	0.622423467	0.624667817	0.623898242	0.462176604	0.227421662	0.360903013
17:18:29.228	0.006505845	0.007753835	0.037679555	0.061121576	0.138148941	0.138292057	0.209212032	0.273491171	0.374852804	0.4568731	0.591648363	0.601949353	0.621568482	0.623800549	0.623049958	0.461584077	0.227125855	0.36043927
17:18:29.293	0.006426848	0.007786515	0.037602914	0.061084992	0.13797497	0.138070882	0.209040008	0.273090354	0.374336087	0.456233183	0.590889717	0.601190766	0.620801113	0.623014935	0.622339902	0.461083449	0.226894657	0.360054648
17:18:29.359	0.006378519	0.007707437	0.03746316	0.060959269	0.137660355	0.138127896	0.208832285	0.272690292	0.373759459	0.455546385	0.590032047	0.600323592	0.619887567	0.62207146	0.62146769	0.460453804	0.226603612	0.359564134
17:18:29.425	0.006362463	0.007580663	0.037388449	0.060865669	0.137364747	0.13789983	0.208372475	0.272250073	0.373125152	0.454766182	0.58905918	0.599358	0.618893452	0.621081116	0.620485999	0.459762309	0.226234813	0.359019663
17:18:29.491	0.006419303	0.007734783	0.037325956	0.060792324	0.137166592	0.137825575	0.208054843	0.271759322	0.372487605	0.453984587	0.588112478	0.598387564	0.617892255	0.620091491	0.619517186	0.459101874	0.225896098	0.358499722
17:18:29.556	0.006355719	0.007793687	0.037261726	0.060644472	0.136844877	0.137584513	0.207821309	0.271301373	0.371830714	0.453194405	0.587093475	0.597366108	0.616854194	0.619007428	0.61847207	0.458342033	0.225540908	0.357912516
17:18:29.621	0.006336933	0.007729134	0.037148541	0.060621361	0.136664165	0.137432292	0.207495007	0.270890103	0.37128133	0.452539771	0.586268551	0.596569772	0.616011335	0.618233331	0.617696366	0.457814748	0.22528471	0.357529583
17:18:29.686	0.006343266	0.007481413	0.037073936	0.06049778	0.136456144	0.137217486	0.207166084	0.270480005	0.370693548	0.451846987	0.585338238	0.595648546	0.615062929	0.617293282	0.616749587	0.457163609	0.224988229	0.357019192
17:18:29.752	0.00634744	0.007380952	0.036957695	0.060416315	0.136168116	0.136966083	0.206846014	0.270130959	0.37009191	0.45112045	0.584481674	0.594797678	0.614226773	0.616423856	0.615915653	0.456602716	0.224706454	0.356578425
17:18:29.817	0.006385494	0.007470115	0.036901512	0.060373574	0.135910768	0.136663232	0.20648704	0.26968727	0.369494901	0.45041647	0.583575437	0.593908358	0.613308079	0.615514686	0.615011627	0.455972127	0.224403555	0.356099974
17:18:29.883	0.006281609	0.0073866	0.036869933	0.060267036	0.135707561	0.136540596	0.206225675	0.26932206	0.368946621	0.449797119	0.58276285	0.593084146	0.61246605	0.614701519	0.614236815	0.455432509	0.224137735	0.355690017
17:18:29.947	0.006262663	0.007589942	0.036778223	0.060127216	0.135493524	0.136275662	0.205971572	0.2688331	0.368337453	0.449076666	0.581791058	0.592143694	0.611521306	0.613767081	0.613313698	0.454763975	0.223809301	0.355172299
17:18:30.013	0.006256882	0.007604869	0.036778736	0.059914408	0.135286346	0.135992168	0.205710814	0.268354661	0.367696629	0.448323714	0.580810236	0.591167269	0.610549441	0.612794474	0.612343712	0.454066778	0.22346716	0.354623491
17:18:30.077	0.006333311	0.007213517	0.036704537	0.05984483	0.135129699	0.135979172	0.205405887	0.267937478	0.367122586	0.447596104	0.579903537	0.590259538	0.609636171	0.611842405	0.611456133	0.453427466	0.223162421	0.354142536
17:18:30.143	0.006267158	0.006898015	0.036659547	0.059712862	0.134849852	0.135756672	0.205055385	0.267499264	0.366514816	0.446890923	0.578953148	0.589297532	0.608662233	0.61088841	0.610480717	0.452733288	0.222799296	0.353611049
17:18:30.207	0.006411024	0.006790696	0.036633286	0.059541366	0.134617768	0.135420403	0.204811161	0.267072111	0.36587761	0.446116431	0.577975872	0.588299368	0.607644833	0.609852829	0.609497117	0.452027317	0.222472618	0.353063741
17:18:30.274	0.006411345	0.006791503	0.03659776	0.059400833	0.13437209	0.135235565	0.204346917	0.266607899	0.365278268	0.445395978	0.577057628	0.587355552	0.606676734	0.608868456	0.608530432	0.451343701	0.222112597	0.352530771
17:18:30.340	0.006436713	0.006738247	0.036517651	0.059285908	0.134189816	0.13489055	0.204001659	0.266209234	0.36468403	0.444671897	0.576178349	0.586481686	0.605811107	0.607994003	0.607663307	0.450734623	0.22179415	0.352056973
17:18:30.404	0.006456944	0.006749947	0.036426454	0.059189096	0.133930903	0.134643122	0.20379394	0.265773903	0.364090711	0.443971865	0.575237474	0.58551602	0.604847879	0.607028206	0.60671994	0.450046501	0.221481292	0.351537628
17:18:30.470	0.006350971	0.006465914	0.036391035	0.059097547	0.133667551	0.134341453	0.203379912	0.26536483	0.363502868	0.443318676	0.574331281	0.584619011	0.603947946	0.606120647	0.605837948	0.44941021	0.221167213	0.351062023
17:18:30.535	0.006303123	0.006497788	0.036312257	0.059033571	0.133546034	0.134116832	0.203021454	0.265025674	0.363006279	0.442745141	0.573604221	0.583921723	0.603256446	0.605478798	0.605189893	0.448982618	0.220949863	0.350725692
17:18:30.601	0.006297986	0.006484877	0.03625393	0.058913738	0.133332119	0.133986358	0.202658446	0.264542763	0.362388545	0.442012063	0.572649638	0.582924039	0.602271004	0.60442052	0.604190002	0.448264685	0.220602469	0.350158263
17:18:30.667	0.006312044	0.006458249	0.036275001	0.0589008	0.133065987	0.13380417	0.2023749	0.26408941	0.361824674	0.441334079	0.57178767	0.582074427	0.601393181	0.603563683	0.60337372	0.447682787	0.220303531	0.349718455
17:18:30.732	0.006314131	0.006288394	0.036195917	0.0588119	0.132883834	0.133691462	0.201982855	0.263613652	0.361245181	0.440655123	0.570872686	0.581182224	0.600444222	0.602608774	0.602482745	0.44704825	0.219987022	0.349229513
17:18:30.798	0.006156618	0.00606488	0.036159985	0.058727045	0.13272791	0.133575834	0.201780379	0.2632536	0.36075943	0.440070347	0.570119373	0.58047891	0.599685076	0.601844995	0.601797117	0.446585229	0.219741975	0.348870017
17:18:30.863	0.006208962	0.006008396	0.036061075	0.058676542	0.132480546	0.133159214	0.201443795	0.262792204	0.360145725	0.439298403	0.569131129	0.579496236	0.598702605	0.600817372	0.600791279	0.445868392	0.219382852	0.348304883
17:18:30.929	0.006220683	0.00600073	0.035981784	0.05864674	0.132191678	0.132872013	0.201131205	0.262413376	0.359563461	0.438631699	0.568274565	0.578645589	0.597823677	0.599939643	0.599961476	0.445290932	0.21909508	0.347864171
17:18:30.994	0.006220041	0.006284853	0.035914094	0.058598735	0.131899679	0.13254662	0.200651633	0.261960991	0.359001515	0.437967596	0.567421631	0.577802041	0.5969462	0.599062949	0.599139029	0.44471671	0.218804892	0.347422401
17:18:31.059	0.006259539	0.006564044	0.035835316	0.058537257	0.13171464	0.132170043	0.200334609	0.261568825	0.358444916	0.437329725	0.566588024	0.576992359	0.596099644	0.598267383	0.598349523	0.444178104	0.218538763	0.347004024
17:18:31.124	0.006275275	0.006984045	0.035769868	0.058493536	0.13146836	0.132091283	0.200156333	0.26115858	0.357879533	0.436590927	0.565687822	0.576090543	0.595153691	0.597342395	0.597460348	0.443558752	0.218243813	0.346519293
17:18:31.189	0.00618279	0.006977186	0.035669614	0.058448119	0.131171911	0.131786041	0.199755215	0.26072049	0.357274999	0.435898554	0.5647891	0.575215273	0.59424018	0.596448863	0.596584631	0.442941305	0.21793229	0.346045241
17:18:31.254	0.006172192	0.006963065	0.035552761	0.058338547	0.130880033	0.13133786	0.199453922	0.260314717	0.356621437	0.435100523	0.563788056	0.574216628	0.593195036	0.595442476	0.59558161	0.442214127	0.217595528	0.345464332
17:18:31.319	0.006269495	0.006957013	0.035527518	0.0582586	0.130611134	0.130998676	0.199112695	0.259798363	0.35594795	0.434261323	0.562681091	0.573110136	0.592035501	0.594287977	0.59444623	0.441382159	0.217197192	0.344824559
17:18:31.385	0.006312758	0.006871077	0.035499932	0.05817303	0.130476505	0.130580996	0.198669022	0.259376302	0.355334782	0.433557161	0.561767235	0.572205584	0.591072826	0.593330835	0.593531579	0.440736065	0.21686623	0.344320393
17:18:31.450	0.006263946	0.006994131	0.035450663	0.058018845	0.130255358	0.130422558	0.198343933	0.258942064	0.354743853	0.432804437	0.560837543	0.571276187	0.590125767	0.592341307	0.592608665	0.440074567	0.216549862	0.343806732
17:18:31.515	0.006381961	0.007163179	0.035349284	0.057883933	0.129999092	0.130137473	0.198030226	0.258434473	0.354068817	0.431983011	0.559779427	0.57019321	0.58900434	0.591216362	0.59151355	0.439257886	0.216152466	0.343170456
17:18:31.581	0.006365262	0.007059087	0.03535122	0.057746255	0.129767369	0.129759041	0.197642014	0.258006081	0.353439965	0.431184653	0.558811427	0.56924688	0.588012436	0.590237961	0.590558039	0.438562054	0.215784116	0.342633755
17:18:31.647	0.006355468	0.007172457	0.035215028	0.057539425	0.129541905	0.129583214	0.197365324	0.257565862	0.352744048	0.430370886	0.557765948	0.568195069	0.586905726	0.589117175	0.589467884	0.437761755	0.21540078	0.342011483
17:18:31.712	0.00641022	0.007147444	0.035197544	0.057440947	0.12926326	0.12939015	0.197116663	0.257146471	0.352149181	0.429619007	0.556874032	0.56728316	0.585979155	0.588181853	0.588572872	0.43711399	0.215093429	0.341508953
17:18:31.778	0.00631067	0.007263235	0.035185838	0.057303982	0.129080744	0.129259676	0.196759506	0.256680051	0.351505771	0.428840994	0.55590076	0.566262295	0.584971187	0.587189448	0.587578161	0.436397964	0.214743028	0.340950821
17:18:31.843	0.00623954	0.007436318	0.035152042	0.057103756	0.128878138	0.128992358	0.196276303	0.256287964	0.350958916	0.428144727	0.555046107	0.565411759	0.584089598	0.586296238	0.586737342	0.435792631	0.214450087	0.34050148
17:18:31.908	0.00631934	0.007160758	0.035139424	0.056991419	0.128654356	0.128667495	0.195760431	0.255891687	0.350374628	0.42740872	0.554149865	0.564508131	0.583163684	0.585331131	0.585822346	0.435133833	0.214115966	0.339996203
17:18:31.974	0.006402834	0.007140495	0.035066343	0.056841337	0.12842516	0.128519519	0.195488985	0.25547572	0.349738304	0.426638176	0.553171968	0.563473106	0.582114774	0.584282819	0.584759702	0.434369689	0.213730382	0.339409539
17:18:32.040	0.006364459	0.007040842	0.034991525	0.056751752	0.128195364	0.128294429	0.195217334	0.255049457	0.349090424	0.425854679	0.552183398	0.562439744	0.581065727	0.583191488	0.583725634	0.43361555	0.213342543	0.338815836
17:18:32.105	0.006367188	0.007050119	0.034913153	0.056671981	0.128031257	0.12788815	0.194837385	0.254610544	0.348496187	0.425143741	0.551293764	0.561551941	0.5801783	0.582279066	0.582833267	0.432973218	0.213034062	0.338325828
17:18:32.171	0.006340855	0.00689963	0.034834674	0.056509765	0.127846697	0.127755555	0.194472563	0.254165729	0.347890802	0.424389397	0.550326997	0.560572148	0.579207437	0.581266219	0.581851982	0.432266505	0.212696977	0.337784745
17:18:32.237	0.00629943	0.006707586	0.034833862	0.056372087	0.12773986	0.127591664	0.194195873	0.253718357	0.347286624	0.423723765	0.5494043	0.559667086	0.57829009	0.580324791	0.580966328	0.43162225	0.212367556	0.337306745
17:18:32.302	0.006159097	0.006892324	0.034750093	0.056304808	0.127581409	0.127377119	0.193786147	0.25330729	0.346723037	0.423100139	0.548595722	0.558822325	0.577442498	0.579453544	0.580144162	0.431047573	0.212091304	0.33686691
17:18:32.368	0.006164806	0.007072668	0.034617467	0.056156253	0.127285922	0.127378974	0.193514298	0.252908253	0.34616121	0.4224203	0.547764053	0.557960268	0.576599467	0.578589243	0.579328272	0.430469707	0.21181253	0.336420288
17:18:32.434	0.006098332	0.007141659	0.034533498	0.056118866	0.127123621	0.127154354	0.193133946	0.252561054	0.345587477	0.421734004	0.546899988	0.55709457	0.575705925	0.577690729	0.578463478	0.429858554	0.211505949	0.335939614
17:18:32.499	0.006019013	0.006827366	0.034513952	0.055974852	0.12686892	0.126907991	0.192799172	0.252168348	0.345026155	0.421070692	0.546041887	0.556238621	0.574816217	0.576795788	0.577603285	0.429268793	0.211224259	0.33548927
17:18:32.565	0.006071839	0.006840681	0.034364934	0.05591034	0.126639605	0.126640142	0.192490415	0.251705093	0.344395884	0.420330092	0.545084586	0.555261782	0.57383188	0.575800641	0.576630075	0.428583591	0.210891724	0.334952244
17:18:32.631	0.006054498	0.006746676	0.034312005	0.055839045	0.126420033	0.12633119	0.192188917	0.251333767	0.343855702	0.419693476	0.544276285	0.554459831	0.573025091	0.574953694	0.575837643	0.428032838	0.210607616	0.334527226
17:18:32.695	0.00610347	0.006923793	0.034237573	0.055698512	0.126292141	0.125973175	0.191631503	0.250947514	0.34326518	0.418978628	0.54332627	0.553519213	0.572069429	0.573964167	0.57489451	0.427366802	0.210284209	0.333997139
17:18:32.761	0.006311882	0.006824139	0.034127848	0.055548342	0.126026853	0.125518368	0.191273537	0.250540716	0.342674627	0.418277387	0.542443414	0.552625457	0.571165246	0.573034922	0.574009279	0.426746723	0.209985522	0.333504972
17:18:32.827	0.006271902	0.006531634	0.0340739	0.055518718	0.125854686	0.125401154	0.191032944	0.250098988	0.342026552	0.41756266	0.54148181	0.551655554	0.570137273	0.572037624	0.573025287	0.426050673	0.209637642	0.332948692
17:18:32.893	0.006169943	0.006453363	0.034042242	0.055389872	0.125673014	0.125209151	0.190862737	0.249564926	0.341357724	0.416741143	0.540393309	0.550537616	0.568982955	0.570890731	0.571883522	0.425222603	0.20923713	0.332302739
17:18:32.958	0.006089661	0.00633394	0.033939032	0.055328484	0.125481303	0.125044995	0.190528165	0.24911716	0.34074963	0.416005502	0.539463997	0.549628649	0.568035689	0.569952262	0.570984426	0.424583409	0.208930346	0.331804853
17:18:33.025	0.006031519	0.006370655	0.033914707	0.055144764	0.125323812	0.124748978	0.19015306	0.248646966	0.340170895	0.415292799	0.53858681	0.548757198	0.567146051	0.569062627	0.570109648	0.423950913	0.208658948	0.331322616
17:18:33.090	0.006061384	0.006197975	0.033868493	0.055016634	0.125112783	0.124643165	0.189723104	0.248254463	0.339646335	0.41464104	0.537723075	0.547925684	0.566270785	0.568204598	0.5692849	0.423380707	0.208366703	0.330874694
17:18:33.156	0.006023812	0.006397685	0.033855768	0.054915182	0.124939532	0.124367096	0.18946073	0.247822557	0.339059973	0.413963566	0.536836673	0.547053065	0.565341968	0.567327401	0.56842984	0.422767884	0.208064143	0.330394082
17:18:33.221	0.006018032	0.006374284	0.033771593	0.054808822	0.124632975	0.124175892	0.189080177	0.247401521	0.338481233	0.413254156	0.535949165	0.546136261	0.564424449	0.5663977	0.567531808	0.422146608	0.207781558	0.329912541
17:18:33.287	0.006005026	0.006384416	0.033712255	0.054784999	0.124384168	0.124105882	0.188801402	0.247001729	0.337944199	0.412565822	0.535108573	0.545315065	0.563577963	0.565580839	0.566728703	0.421565047	0.207497336	0.329480222
17:18:33.353	0.005961193	0.006119346	0.033691697	0.054732078	0.124245086	0.123691118	0.188417221	0.246544872	0.337334933	0.411887747	0.534179392	0.544385535	0.562607342	0.564652599	0.565790281	0.420896193	0.207173568	0.328961754
17:18:33.418	0.005910133	0.006187933	0.033578611	0.054607694	0.124047049	0.123411338	0.188106247	0.246093107	0.336700348	0.411151459	0.533198592	0.543397923	0.56157588	0.563608468	0.564788653	0.420140519	0.206805669	0.328395825
17:18:33.483	0.005934057	0.006528047	0.033498708	0.054556299	0.12382375	0.123218274	0.187646239	0.245648123	0.336093641	0.410388665	0.532243199	0.54239171	0.560560794	0.562586562	0.563794911	0.419425268	0.206441801	0.327824077
17:18:33.549	0.005753262	0.006498998	0.033462064	0.054481705	0.123681782	0.123135799	0.187286056	0.245266343	0.335550873	0.409740808	0.53142419	0.541587263	0.559723739	0.561734055	0.563017251	0.418854354	0.206179147	0.327402329
17:18:33.614	0.005718901	0.006544724	0.033451077	0.054318686	0.123530669	0.122959064	0.186920431	0.244861257	0.334990465	0.409031771	0.530535436	0.540676374	0.558804389	0.56083369	0.562137529	0.41821381	0.20587556	0.326912792
17:18:33.680	0.005584189	0.006466856	0.033375047	0.054280319	0.123307129	0.122715616	0.186758894	0.244377254	0.334365484	0.408325479	0.529638648	0.539756227	0.557861822	0.559911444	0.561226899	0.417535458	0.205550473	0.326401136
17:18:33.744	0.005472918	0.006579017	0.033283032	0.054233473	0.123101876	0.122485955	0.186372093	0.243936832	0.333737861	0.407601079	0.528654219	0.538777499	0.556857343	0.558897908	0.560212454	0.416794614	0.205182737	0.325840926
17:18:33.809	0.005457985	0.006636308	0.033147758	0.054150937	0.122851385	0.122321534	0.186103468	0.243537728	0.333165836	0.406897868	0.527790233	0.5378933	0.555998177	0.558031457	0.559364968	0.416179394	0.204884339	0.325362827
17:18:33.874	0.005514665	0.006542303	0.033032436	0.054090797	0.122676451	0.122165068	0.185776558	0.243231092	0.33263646	0.406263936	0.527010963	0.537146052	0.555244731	0.557290637	0.558655303	0.415689294	0.204647874	0.324976804
17:18:33.939	0.005452847	0.006520919	0.033010347	0.05399086	0.122462229	0.121812623	0.185385521	0.242818447	0.332058696	0.405573792	0.526108479	0.536248362	0.554345246	0.556338553	0.557764736	0.415047789	0.204331042	0.324471969
17:18:34.004	0.005464587	0.006537865	0.032957824	0.053900225	0.122187917	0.121754814	0.185029574	0.242402919	0.331477655	0.404878354	0.525201349	0.535342479	0.553431216	0.555396863	0.556877439	0.414427205	0.204010687	0.323990265
17:18:34.069	0.005425409	0.006441439	0.032951315	0.053821972	0.121936584	0.121542924	0.184919661	0.241997079	0.330877844	0.404169088	0.524360558	0.534485703	0.552556987	0.554509003	0.556045899	0.413830122	0.203728797	0.323537988
17:18:34.135	0.005390406	0.006254235	0.032864591	0.05374702	0.121698004	0.121462568	0.184596788	0.241687221	0.330385441	0.403565245	0.523636132	0.5337652	0.55184348	0.55372473	0.555349848	0.413345961	0.20349469	0.323168951
17:18:34.201	0.005475184	0.006287723	0.032806064	0.053724445	0.121549657	0.121115164	0.184305778	0.241313078	0.329890178	0.402932896	0.522870649	0.532994556	0.551086649	0.552930447	0.554592125	0.412808485	0.203211242	0.322755759
17:18:34.266	0.005488511	0.006207838	0.032711913	0.053555804	0.121291465	0.120855536	0.183931883	0.240917623	0.329305612	0.40227706	0.522003624	0.532118373	0.550217083	0.552034067	0.55373273	0.41220759	0.202914024	0.322286397
17:18:34.332	0.005457361	0.006329279	0.032685545	0.053484421	0.121037727	0.120826629	0.183763083	0.240556885	0.328780081	0.401559527	0.521149214	0.531277679	0.549353737	0.551162626	0.552871473	0.41160661	0.202605559	0.321813673
17:18:34.398	0.005484175	0.006048877	0.032630785	0.053351294	0.120750783	0.120510251	0.183486998	0.240149186	0.328237664	0.400892831	0.520307516	0.530461497	0.548529811	0.550332397	0.552074581	0.411064917	0.202344774	0.321387291
17:18:34.462	0.005491401	0.005771702	0.032571547	0.053319172	0.120589442	0.120304992	0.183360954	0.23974749	0.327707591	0.400268886	0.519494722	0.529697649	0.547733905	0.54956084	0.551318876	0.41053446	0.202064187	0.320994302
17:18:34.528	0.00560508	0.00568859	0.032537958	0.05314018	0.120293111	0.120011156	0.183095154	0.239255095	0.32706431	0.399467007	0.518512504	0.528660412	0.546665682	0.548536829	0.550251068	0.409770789	0.201662925	0.320392847
17:18:34.593	0.005510187	0.005545632	0.032452864	0.053045866	0.120017354	0.119727513	0.182791234	0.238765178	0.326441915	0.398731973	0.517571527	0.527731626	0.545704942	0.547560384	0.549288625	0.409084591	0.201311546	0.319867774
17:18:34.658	0.005599068	0.005402406	0.03241286	0.052927908	0.119762531	0.119461259	0.18260973	0.238407053	0.325909892	0.398097951	0.516723513	0.526887397	0.54483555	0.546684874	0.548439152	0.408485433	0.201009089	0.319414313
17:18:34.723	0.005644507	0.005160735	0.032363391	0.052833148	0.119503136	0.119309569	0.182505061	0.238034352	0.325355279	0.3973975	0.515863482	0.52601995	0.543915819	0.545793627	0.547577613	0.407870754	0.200714607	0.31893878
17:18:34.789	0.005617211	0.005041312	0.032353521	0.05273125	0.119229786	0.119037744	0.182089018	0.237598188	0.324752129	0.39667834	0.514926937	0.525088863	0.542937528	0.544807397	0.546611445	0.407172088	0.200370957	0.318407392
17:18:34.855	0.00552585	0.005314452	0.032316778	0.052612311	0.118983025	0.118787932	0.181786717	0.23716244	0.324116594	0.395937778	0.513947485	0.52406903	0.541860116	0.54373916	0.545544357	0.406398446	0.199982092	0.317806876
17:18:34.920	0.005481214	0.005242054	0.032264361	0.052511752	0.118736262	0.118574716	0.181582626	0.236793029	0.323582207	0.39523789	0.513080437	0.523210674	0.540954551	0.542877662	0.544714242	0.405796251	0.199695142	0.317342899
17:18:34.986	0.005433848	0.005027415	0.032261513	0.052409477	0.118497804	0.118168703	0.181251688	0.236391863	0.323014429	0.394556705	0.512195242	0.522331515	0.540040348	0.542006685	0.54381405	0.405156821	0.199362914	0.3168471
17:18:35.051	0.005489081	0.00488782	0.032193822	0.052288931	0.118296641	0.117928701	0.180755784	0.236014262	0.322426462	0.393873337	0.511286738	0.521406702	0.539090387	0.541031844	0.542868289	0.404493889	0.199034844	0.316326554
17:18:35.117	0.00561962	0.00485877	0.03215443	0.052224598	0.118025697	0.117591907	0.180461948	0.235537805	0.321784131	0.393110916	0.510289918	0.520395757	0.53804096	0.540024077	0.541842655	0.403747039	0.198680826	0.315741759
17:18:35.182	0.005574983	0.00492413	0.032046329	0.052106549	0.117774726	0.117487541	0.180149362	0.235107352	0.321121852	0.392298404	0.509260864	0.519375912	0.536943889	0.53898484	0.540794455	0.402984143	0.198294082	0.315140873
17:18:35.248	0.005611912	0.004866839	0.032089528	0.052014109	0.11759474	0.117275651	0.179822657	0.234718487	0.320565635	0.391589869	0.508376581	0.518483975	0.536020531	0.538063051	0.539908927	0.402348611	0.197981023	0.314636825
17:18:35.313	0.005603563	0.004733295	0.031968609	0.051850108	0.117393697	0.116988976	0.179452393	0.234281084	0.31995335	0.390815841	0.507404353	0.517503087	0.535030701	0.537046375	0.538925764	0.401626578	0.197631831	0.314067499
17:18:35.378	0.005701187	0.005008856	0.031905398	0.051817629	0.11722498	0.116815273	0.179028684	0.233811645	0.31935552	0.390067901	0.506454016	0.516524548	0.534040421	0.536044184	0.537927986	0.40090188	0.19727787	0.313504867
17:18:35.443	0.005718368	0.005153293	0.031858778	0.051624094	0.11705137	0.116680819	0.178544674	0.233399406	0.318718479	0.389300141	0.5054669	0.51554562	0.533040606	0.535011622	0.536928767	0.400171107	0.196954549	0.312940366
17:18:35.509	0.00577039	0.005158538	0.031758317	0.051533796	0.11686657	0.11655671	0.178146375	0.233046778	0.31817779	0.38869397	0.504650067	0.514764369	0.532242558	0.53418583	0.536153345	0.399629785	0.196715197	0.312512384
17:18:35.574	0.005856292	0.005077847	0.031667213	0.051469105	0.116679245	0.116293106	0.177804345	0.232666857	0.317632885	0.388046113	0.503815249	0.513918513	0.531380835	0.533323402	0.535352336	0.399056424	0.19643616	0.312054893
17:18:35.640	0.005870333	0.005334445	0.031578453	0.051338276	0.116389172	0.116093147	0.177354018	0.232262109	0.316996757	0.387244553	0.502851742	0.512947959	0.530388379	0.532314804	0.534389236	0.39836724	0.196101558	0.311499897
17:18:35.706	0.005821682	0.005281996	0.031515654	0.051234861	0.116158414	0.115851555	0.176925875	0.231801468	0.31643172	0.386568935	0.501969745	0.512057331	0.529526	0.531434633	0.533532267	0.397754332	0.195769741	0.311023378
17:18:35.771	0.005841752	0.005500669	0.03139178	0.051110031	0.115966756	0.115568326	0.176691937	0.231405179	0.315923158	0.385910407	0.501173028	0.511246884	0.528738523	0.530649311	0.53277229	0.397223656	0.19551793	0.310617189
17:18:35.837	0.005904853	0.005441764	0.031325414	0.050979668	0.115657551	0.115503621	0.176343652	0.23097913	0.31539082	0.385264832	0.50037362	0.510449905	0.527960859	0.52983326	0.532032453	0.396694634	0.195277626	0.310210982
17:18:35.902	0.005964102	0.005350762	0.03121477	0.050908732	0.115455426	0.115340524	0.176054013	0.230596055	0.3147803	0.384561917	0.499497697	0.509565935	0.527074814	0.52890983	0.531140446	0.396072548	0.194970139	0.309733208
17:18:35.968	0.005893131	0.005284595	0.031061281	0.050855909	0.115215884	0.115256988	0.175793252	0.23020568	0.314227075	0.383918471	0.498667879	0.508746814	0.526225805	0.528049935	0.530338687	0.39550828	0.194688446	0.309301196
17:18:36.034	0.005823928	0.005447188	0.030975987	0.050723048	0.114989937	0.114909849	0.175592389	0.229739564	0.313638603	0.383216021	0.497779217	0.507844203	0.525312777	0.527130792	0.529442282	0.394863317	0.194345929	0.308799551
17:18:36.099	0.005747179	0.005468975	0.030894154	0.050649256	0.114839306	0.114773539	0.175295131	0.229339018	0.313064678	0.382527131	0.496898938	0.506950621	0.52440819	0.52617858	0.528549336	0.394237806	0.194008008	0.308309237
17:18:36.165	0.00580418	0.005547246	0.030830643	0.050532279	0.114601449	0.114582744	0.174977499	0.228944104	0.312555208	0.381965575	0.496153783	0.506218842	0.523705151	0.525403914	0.527871062	0.3937596	0.193775471	0.307962417
17:18:36.230	0.005838219	0.005663441	0.030678225	0.050341867	0.114365996	0.114256025	0.174752234	0.22856398	0.311961192	0.38125631	0.49527028	0.505329911	0.522784391	0.524501698	0.526990119	0.393148413	0.193481245	0.307490615
17:18:36.296	0.005808372	0.005908742	0.030684334	0.050297878	0.114091444	0.114258941	0.17435555	0.228171543	0.311411782	0.380659798	0.49447488	0.504534064	0.52197302	0.523691805	0.526223476	0.392617399	0.193228572	0.307083531
17:18:36.362	0.005795526	0.005766725	0.030676701	0.050125222	0.113817289	0.114038031	0.173992949	0.227796849	0.310837233	0.379992493	0.493613211	0.503691502	0.521080867	0.522833582	0.525385223	0.392036868	0.192944136	0.306622165
17:18:36.428	0.005768712	0.005707417	0.030648103	0.050079627	0.113501228	0.113729874	0.173802976	0.227394928	0.310311661	0.379368358	0.492834963	0.502885088	0.520279101	0.522008156	0.524631255	0.391504656	0.19268618	0.306217746
17:18:36.492	0.005640742	0.005632777	0.030604944	0.050008155	0.113269386	0.113423043	0.17350511	0.227033367	0.30980008	0.378749471	0.492046659	0.502090188	0.519466127	0.521221471	0.523860574	0.390971416	0.192412227	0.305807807
17:18:36.558	0.005623562	0.005798598	0.030569013	0.049913307	0.113052701	0.113199751	0.173106608	0.226689942	0.309243512	0.378091734	0.491187166	0.501220053	0.518588678	0.520369242	0.522995233	0.390370672	0.192115961	0.305351546
17:18:36.623	0.005536857	0.005496813	0.030557619	0.049837216	0.112883781	0.11304223	0.172786155	0.226317342	0.308752559	0.377499124	0.490416283	0.500452478	0.51778675	0.519589884	0.522225804	0.389846424	0.191846064	0.304951003
17:18:36.689	0.005551308	0.005533931	0.030481077	0.04972238	0.112715825	0.112873567	0.172459852	0.225905453	0.308182169	0.376803222	0.489559851	0.499611699	0.51689101	0.518684603	0.521376409	0.389249173	0.191573389	0.304485481
17:18:36.755	0.005608951	0.005601711	0.030484538	0.049652961	0.112543175	0.112761598	0.17218155	0.22555813	0.307629513	0.37616688	0.4887278	0.498795698	0.516030922	0.517825061	0.52057925	0.388699128	0.191298698	0.304049232
17:18:36.820	0.00555179	0.005556928	0.030407789	0.049582382	0.11240626	0.11249481	0.171877432	0.225182602	0.307117772	0.375510717	0.487954952	0.498033018	0.515236269	0.51706087	0.519825611	0.388190908	0.191051268	0.303648301
17:18:36.886	0.005561745	0.005825629	0.030426211	0.049511891	0.112237101	0.112298566	0.171466877	0.224749738	0.30659444	0.374883981	0.487132776	0.497201086	0.514368276	0.516212298	0.518997624	0.387583602	0.190775112	0.303185697
17:18:36.951	0.00560574	0.006016464	0.030437405	0.049361543	0.112018733	0.112167557	0.171085518	0.224329389	0.305961965	0.374116448	0.486163433	0.49619125	0.513349276	0.515170572	0.517980894	0.386837358	0.190449186	0.302601761
17:18:37.017	0.005636247	0.005812719	0.030336099	0.049271869	0.111796756	0.112029392	0.170582552	0.223929316	0.30536492	0.373375201	0.485177713	0.495212843	0.512322575	0.514132293	0.516986293	0.38610333	0.190102395	0.30204277
17:18:37.082	0.005613287	0.006000325	0.030312992	0.049150965	0.111603052	0.11192305	0.170236081	0.22352788	0.304798938	0.372657943	0.484292249	0.494325465	0.511417269	0.513240275	0.516118244	0.385483134	0.18981093	0.30156281
17:18:37.147	0.005508598	0.005935369	0.030335687	0.049075478	0.111358335	0.111816707	0.169899295	0.223190447	0.304232735	0.371967562	0.483418022	0.493447362	0.510485664	0.512349861	0.515221026	0.384850149	0.189515187	0.301059557
17:18:37.211	0.005510204	0.005857502	0.030282658	0.049029347	0.111184966	0.111679072	0.169560692	0.222750915	0.303667377	0.371294781	0.482537536	0.492575486	0.509606166	0.511443208	0.514324308	0.384189225	0.189191702	0.300547377
17:18:37.277	0.005438254	0.005661825	0.030239192	0.048915581	0.111021942	0.111253967	0.169371119	0.222317781	0.303072949	0.370571118	0.481632903	0.491670576	0.508678486	0.51048785	0.513435478	0.383545762	0.188879884	0.300050169
17:18:37.343	0.005465068	0.005584362	0.030226774	0.048857226	0.110817292	0.111026165	0.169113385	0.2219171	0.302492191	0.369885476	0.480758108	0.490765458	0.507774478	0.509563176	0.512556365	0.382910365	0.188568771	0.299550584
17:18:37.407	0.005461857	0.005693699	0.030113588	0.048769693	0.110676164	0.110954035	0.168683626	0.221499713	0.301904539	0.369180105	0.479826509	0.489845792	0.506814025	0.508595791	0.511620948	0.382237546	0.188215608	0.299023804
17:18:37.473	0.005438575	0.005803215	0.030015264	0.048649502	0.110473798	0.110822765	0.1684144	0.221083003	0.301293451	0.368420239	0.478858267	0.488858538	0.505822153	0.507588654	0.510658254	0.381533785	0.187867641	0.298496111
17:18:37.539	0.005411119	0.005839526	0.029992875	0.048606494	0.110265176	0.110711913	0.168314373	0.220643685	0.300741709	0.367750006	0.478001646	0.48799894	0.504930673	0.5066841	0.509798515	0.38091558	0.187546849	0.29802626
17:18:37.604	0.005456077	0.006142521	0.029944119	0.048508343	0.11010107	0.110575599	0.168068517	0.220220069	0.300212931	0.367134504	0.477183901	0.487198804	0.504123545	0.505875257	0.509005362	0.380351498	0.187288509	0.297594936
17:18:37.670	0.005445961	0.006333759	0.029890371	0.048391009	0.109891364	0.110365564	0.167782146	0.219840215	0.299643863	0.36640811	0.47628384	0.486287805	0.503190213	0.504909198	0.508085844	0.379672032	0.186960824	0.297066728
17:18:37.736	0.005371299	0.006189725	0.029837036	0.048259219	0.10974338	0.110221885	0.167312054	0.219345128	0.299004205	0.36562215	0.47526452	0.485257064	0.502132062	0.503866116	0.507007473	0.378881316	0.186559416	0.29645696
17:18:37.801	0.005394259	0.00618569	0.029762125	0.048167047	0.10954306	0.109980028	0.167135797	0.218915564	0.298395858	0.364928757	0.474326442	0.484319951	0.501169476	0.502880342	0.50607215	0.378198256	0.186205518	0.295937056
17:18:37.867	0.005352352	0.006020273	0.029672552	0.048047482	0.109247171	0.109766283	0.166833493	0.21852849	0.297859484	0.364274032	0.473486114	0.483469759	0.500327889	0.502005701	0.505258982	0.377633111	0.18590134	0.29549881
17:18:37.932	0.005357579	0.006372894	0.029535654	0.048008936	0.108992829	0.109470327	0.166595725	0.21815847	0.297334356	0.363606408	0.47268886	0.482672777	0.499535976	0.501226966	0.504486518	0.377087959	0.185603564	0.295071334
17:18:37.997	0.005331247	0.006362808	0.029544232	0.04796575	0.108742579	0.109353639	0.166329119	0.217735102	0.296786019	0.36291389	0.471872811	0.48182694	0.498685448	0.500409633	0.503703474	0.376535333	0.185337225	0.294634209
17:18:38.061	0.005352923	0.006082003	0.029382903	0.047831731	0.108488239	0.109036466	0.16601008	0.217312005	0.296217611	0.362226674	0.471005058	0.480970292	0.497801054	0.499538978	0.502845253	0.37592251	0.185052343	0.294176411
17:18:38.127	0.005377169	0.006107421	0.02933812	0.047746073	0.108253147	0.108725924	0.165802357	0.21685089	0.29565853	0.361523622	0.470112653	0.48003762	0.496843406	0.498571406	0.501928896	0.375262278	0.184735057	0.293655639
17:18:38.192	0.005240528	0.006196585	0.029248653	0.04766443	0.107994475	0.108591735	0.165434714	0.216449612	0.295022747	0.360750333	0.469165726	0.479060725	0.495836246	0.497599899	0.5009788	0.374579032	0.18439587	0.293119508
17:18:38.257	0.005239886	0.00628817	0.029163666	0.047532819	0.107772377	0.108458606	0.164994064	0.216060544	0.294473301	0.360084884	0.468308999	0.47820769	0.494947133	0.496755718	0.500124381	0.373973497	0.184089446	0.29265703
17:18:38.322	0.005175982	0.00619013	0.029042134	0.047426726	0.107579275	0.108335174	0.164815785	0.215673818	0.293959041	0.359452299	0.467525333	0.477423529	0.494144627	0.49596276	0.49935766	0.373430674	0.183831472	0.292251862
17:18:38.388	0.00516988	0.006119525	0.028985132	0.047315102	0.107281984	0.108030198	0.16447436	0.215311143	0.293392022	0.358783602	0.466714658	0.47657973	0.493285375	0.495128365	0.498524947	0.372842938	0.18354701	0.291797055
17:18:38.454	0.005224151	0.006093929	0.028974038	0.047226499	0.10713412	0.107751743	0.164243849	0.214892585	0.292854229	0.358138201	0.465940035	0.475834674	0.492493556	0.494319357	0.497751653	0.372298866	0.183296658	0.291375307
17:18:38.519	0.005180638	0.005970875	0.02897465	0.047134416	0.106900233	0.107536143	0.163945176	0.214534527	0.292300659	0.357467367	0.465100191	0.475014266	0.491645753	0.493477379	0.49693523	0.371721051	0.183029742	0.29092696
17:18:38.584	0.005017183	0.005907532	0.028942585	0.047078738	0.106650705	0.107293756	0.163682419	0.21410992	0.291704058	0.356760886	0.464207843	0.474107163	0.490745902	0.492575695	0.49607089	0.371103723	0.182699656	0.290463037
17:18:38.649	0.004967568	0.005903094	0.028928949	0.047037246	0.10640202	0.106988779	0.163259718	0.213763273	0.291162363	0.35618224	0.463424349	0.473341751	0.489969174	0.491819184	0.49533254	0.370586189	0.182464546	0.290086401
17:18:38.714	0.004971903	0.005828679	0.028872965	0.046978713	0.106101479	0.106697333	0.16303909	0.213412155	0.290670187	0.355583454	0.462672905	0.472607007	0.489206942	0.491017722	0.494605958	0.370079825	0.182224808	0.28968397
17:18:38.779	0.004994062	0.00586257	0.028886821	0.046864947	0.105889125	0.106494724	0.162705928	0.213065035	0.290145657	0.354973526	0.461858036	0.471818111	0.488393129	0.490198516	0.4938111	0.36950314	0.181963382	0.289242526
17:18:38.844	0.004848752	0.005626549	0.028819138	0.046734586	0.105715312	0.106457332	0.162377208	0.212666144	0.289536365	0.354218909	0.460912293	0.470873215	0.487401281	0.489197516	0.4928262	0.368799143	0.181602959	0.288698082
17:18:38.909	0.004839189	0.005240844	0.028807431	0.046660992	0.105569735	0.106163496	0.162073896	0.212226894	0.28895936	0.353568222	0.460051395	0.470014996	0.486499561	0.488288765	0.49195039	0.36818281	0.181317151	0.288230825
17:18:38.976	0.004851874	0.005198077	0.028706964	0.046535805	0.105389627	0.105842878	0.161871417	0.211822979	0.288434892	0.352946764	0.459237015	0.469216646	0.485677124	0.487478888	0.491136862	0.367605974	0.181032466	0.287789805
17:18:39.041	0.004786525	0.005196866	0.028682639	0.046474326	0.105114232	0.105664135	0.1615675	0.211467535	0.287900918	0.352299607	0.458422688	0.468367611	0.484817088	0.486624187	0.490299501	0.36700518	0.180726186	0.287312826
17:18:39.107	0.004749915	0.005019749	0.028562938	0.046345303	0.104993319	0.105615602	0.161084099	0.211055026	0.287285924	0.35159419	0.457520236	0.467483985	0.483914939	0.485743738	0.489407635	0.366365497	0.180407982	0.28682328
17:18:39.173	0.004734983	0.004968914	0.028583289	0.04624733	0.104840401	0.105350939	0.160774939	0.210647575	0.286795419	0.35095873	0.456737227	0.466715212	0.48312209	0.484923018	0.488665842	0.365845247	0.180157217	0.286425755
17:18:39.238	0.004865361	0.005011277	0.028535751	0.046164258	0.104636109	0.104995048	0.160564196	0.210248887	0.286228684	0.350245563	0.455823938	0.465811296	0.482214165	0.483990162	0.48775357	0.365179278	0.179834461	0.285912455
17:18:39.304	0.004784758	0.005081479	0.028497783	0.046084488	0.104465626	0.104779561	0.160148153	0.209817127	0.285660623	0.349544329	0.454920367	0.464913336	0.481297783	0.483071146	0.486834975	0.364530839	0.179491304	0.285406835
17:18:39.369	0.004746383	0.004969318	0.028494835	0.045980539	0.104271681	0.104701595	0.15992542	0.209404066	0.28512173	0.348840722	0.454048668	0.464038096	0.480405626	0.482188914	0.485963389	0.363891932	0.179183336	0.284916114
17:18:39.435	0.004723903	0.004850702	0.028447503	0.045950559	0.104065226	0.104598698	0.159638847	0.209030881	0.284560445	0.348129411	0.453172159	0.463116781	0.479479186	0.481233735	0.485068456	0.363244202	0.178855326	0.284410792
17:18:39.501	0.004800974	0.004715947	0.028317013	0.045836169	0.103883193	0.104440107	0.159158469	0.208589355	0.283989741	0.347402547	0.452288096	0.462186105	0.478532525	0.480254128	0.484131724	0.362552504	0.178530729	0.283863429
17:18:39.566	0.004832605	0.004350012	0.028215328	0.045678236	0.103636673	0.104244658	0.158774691	0.208160141	0.283375815	0.346643928	0.451327409	0.461199553	0.477518911	0.479205441	0.483123711	0.361815354	0.178181605	0.283277298
17:18:39.633	0.004879794	0.004211223	0.028198124	0.045618365	0.103503847	0.1041293	0.158645419	0.207751822	0.282812098	0.345932845	0.450414896	0.460288661	0.476579277	0.478265039	0.482209435	0.361164283	0.177841919	0.282745593
17:18:39.698	0.004806576	0.004070193	0.028178684	0.045494873	0.103238679	0.103869142	0.158418744	0.207336497	0.28223741	0.345249804	0.44954865	0.459412389	0.475663164	0.477401473	0.48135691	0.360546095	0.177547033	0.282277884
17:18:39.763	0.004680532	0.004016533	0.02807658	0.045442229	0.10302332	0.103600503	0.158100913	0.2069355	0.281665194	0.344557431	0.44870053	0.458517768	0.474744508	0.476489471	0.480462853	0.359917412	0.177221283	0.281789467
17:18:39.828	0.004764026	0.004052036	0.028083394	0.04541778	0.102835391	0.103270334	0.157786711	0.206510544	0.281103212	0.34391394	0.447867086	0.457717428	0.47389107	0.475669253	0.479658871	0.359345957	0.176956194	0.28134477
17:18:39.894	0.004824719	0.004144832	0.028015704	0.045291681	0.102610406	0.103159895	0.157438426	0.206082626	0.280570368	0.3432146	0.446982539	0.456808114	0.47298005	0.474761641	0.478800118	0.358720615	0.176619336	0.280859777
17:18:39.959	0.004711681	0.004430478	0.028010819	0.04525938	0.102419712	0.102886741	0.157090347	0.205686686	0.279976322	0.34251008	0.446076721	0.45587732	0.472032756	0.473805488	0.477850789	0.3580426	0.176288522	0.280332599
17:18:40.024	0.004702208	0.004589396	0.027986288	0.045167476	0.102294466	0.102628177	0.156808006	0.205295557	0.279399915	0.341846434	0.445172735	0.454974373	0.471090821	0.47287784	0.476935856	0.357375012	0.175960537	0.279813183
17:18:40.090	0.004672022	0.004693487	0.027905573	0.045085921	0.102039044	0.102133857	0.156629529	0.204915635	0.278883447	0.341199094	0.444345287	0.454133205	0.470237283	0.472018934	0.47610538	0.356773914	0.175666336	0.279348247
17:18:40.156	0.00471698	0.004469569	0.027835853	0.044974297	0.101786748	0.10196095	0.156390549	0.204512622	0.278341592	0.340541448	0.443440363	0.453241043	0.469325516	0.471112514	0.475180401	0.356099374	0.175326503	0.278825822
17:18:40.221	0.004660301	0.004318273	0.027730913	0.044908268	0.101611212	0.101860708	0.156019072	0.204067942	0.27777961	0.339892845	0.44259759	0.452362648	0.468420245	0.470204258	0.474311538	0.355472581	0.175009062	0.278329219
17:18:40.287	0.00473946	0.004271069	0.027702921	0.044835727	0.101406722	0.101594719	0.155816395	0.203698463	0.277238137	0.339246889	0.441782131	0.451565529	0.467588656	0.469375648	0.473510624	0.354900705	0.174738486	0.277872587
17:18:40.351	0.004743153	0.00435176	0.02763167	0.044772731	0.101253684	0.101288417	0.155437547	0.203281009	0.276678771	0.338632132	0.440956643	0.450744001	0.466728409	0.468505405	0.472681275	0.35431469	0.174437814	0.277421023
17:18:40.417	0.004684226	0.004382422	0.027534364	0.044597486	0.100977926	0.10110941	0.155032193	0.202854892	0.276112098	0.3379807	0.4400755	0.449890537	0.465858508	0.467619974	0.47182368	0.353695034	0.174140519	0.276937268
17:18:40.481	0.004630919	0.004415909	0.027452524	0.044489163	0.10078711	0.100887974	0.154816808	0.202417703	0.275541796	0.337356147	0.439227538	0.449051	0.465007831	0.466788419	0.47100685	0.353126144	0.173861132	0.27650026
17:18:40.546	0.004655004	0.004827435	0.027398071	0.044447455	0.100667279	0.100612174	0.154540521	0.202143317	0.275053145	0.336792552	0.438520665	0.448355701	0.464277903	0.46608867	0.470313789	0.352644176	0.17362321	0.2761306
17:18:40.610	0.004584694	0.00483389	0.027280873	0.044320306	0.100454206	0.100328153	0.154137384	0.201716649	0.274482281	0.336117733	0.43766222	0.447445781	0.463374912	0.465149107	0.469392174	0.351977026	0.173303018	0.275629922
17:18:40.676	0.004653095	0.004905706	0.027160965	0.044265251	0.100289618	0.100033522	0.153749572	0.201260896	0.273878573	0.335359115	0.436702554	0.446449096	0.462365222	0.464145949	0.46838571	0.351248919	0.172944508	0.275052897
17:18:40.742	0.004580199	0.005056599	0.027129918	0.044142118	0.100083042	0.099882362	0.153284925	0.200780497	0.273315771	0.334651279	0.435809885	0.445574557	0.461460884	0.463234771	0.467511605	0.350609506	0.172650895	0.27455465
17:18:40.807	0.00456623	0.005177232	0.026987729	0.043964643	0.09989319	0.099732526	0.152935431	0.200420987	0.272788475	0.333987967	0.434971279	0.444710172	0.460604516	0.462357065	0.466650958	0.349982713	0.172340511	0.274066585
17:18:40.872	0.00459465	0.005220805	0.026956889	0.04387604	0.099698404	0.099534279	0.152589971	0.200109068	0.272236541	0.333347495	0.434142214	0.443891376	0.459749009	0.461509953	0.465806586	0.349363225	0.172065608	0.273581149
17:18:40.938	0.00460589	0.004860923	0.026859683	0.043738629	0.099496519	0.09941574	0.152356839	0.199722545	0.271703413	0.332707023	0.433318689	0.443070525	0.458930763	0.460653993	0.46500093	0.348768944	0.171777597	0.273129965
17:18:41.003	0.004615363	0.004878316	0.026750057	0.043674207	0.099313162	0.099064091	0.151958341	0.199283633	0.271161306	0.332045339	0.432490056	0.442258199	0.458086039	0.459765362	0.464161613	0.348163696	0.171476943	0.272663973
17:18:41.069	0.004650045	0.004933992	0.0267639	0.043607465	0.099111398	0.099053746	0.151590295	0.198911067	0.270575294	0.331339968	0.43159806	0.44135171	0.457153732	0.458825874	0.463244708	0.347495297	0.171155739	0.272155497
17:18:41.134	0.00466	0.005144193	0.026717081	0.043519308	0.098932734	0.098736573	0.151314007	0.198481222	0.26998276	0.330665323	0.430750226	0.440470631	0.456260695	0.457930371	0.462382904	0.346882001	0.170862911	0.271681735
17:18:41.200	0.004569834	0.004962234	0.026703032	0.043428654	0.098732535	0.098483315	0.151090736	0.19818558	0.269473512	0.330029445	0.429949845	0.439683132	0.45543794	0.45710069	0.461596762	0.346321193	0.170581288	0.271257195
17:18:41.266	0.004537399	0.004883739	0.026629445	0.043373778	0.098521106	0.098535558	0.150821909	0.197790395	0.26892744	0.329352443	0.429087629	0.438780547	0.454533453	0.456187548	0.460720904	0.345669244	0.17025621	0.270770639
17:18:41.332	0.00452616	0.004769561	0.026522774	0.043272504	0.098298888	0.098534498	0.150431678	0.197432912	0.268394029	0.328676878	0.428220824	0.437927604	0.453666289	0.455255141	0.459869835	0.345056083	0.169959831	0.270288953
17:18:41.398	0.004596005	0.004738092	0.026478497	0.043282767	0.098173883	0.098324733	0.150157205	0.197044869	0.267842627	0.327985859	0.427330899	0.437035852	0.452735185	0.454355578	0.458957515	0.344399428	0.169635987	0.269776791
17:18:41.463	0.004515562	0.004824431	0.026429235	0.043173284	0.097978736	0.098180646	0.14978936	0.1966688	0.267294223	0.32728569	0.426467314	0.436190037	0.451851323	0.453442383	0.458102941	0.34378053	0.169326314	0.269282844
17:18:41.530	0.004579467	0.004825237	0.026359308	0.043040999	0.097804523	0.098186216	0.149425751	0.196198055	0.266730636	0.326528509	0.425513215	0.435233673	0.450864574	0.452436348	0.457124082	0.34306884	0.168993545	0.268729411
17:18:41.595	0.00456052	0.004535556	0.026350603	0.042901536	0.097624174	0.09801914	0.149194638	0.195776816	0.266183899	0.325854838	0.424649229	0.434407405	0.450007367	0.451607655	0.456314983	0.342484479	0.168713171	0.268271342
17:18:41.661	0.004518935	0.004561377	0.026299817	0.042813737	0.097420604	0.09787514	0.148991558	0.195427905	0.265684162	0.325253079	0.423896948	0.43366472	0.449245768	0.450820693	0.455575052	0.341957177	0.168472376	0.267879844
17:18:41.726	0.00452616	0.004471809	0.026235594	0.042742533	0.097273341	0.097692152	0.148662027	0.195058493	0.265141048	0.324577096	0.423042454	0.43277716	0.448349186	0.449928262	0.454703389	0.341328865	0.16814766	0.267399106
17:18:41.792	0.004549281	0.004567025	0.026225312	0.042683464	0.097062675	0.097358273	0.148529732	0.194670056	0.264585357	0.323917404	0.422241812	0.431950974	0.447506019	0.449101008	0.45389875	0.340764412	0.167891352	0.266964556
17:18:41.857	0.00437539	0.004601319	0.026128412	0.04258924	0.096893276	0.097118272	0.148250624	0.194244897	0.264024257	0.323243969	0.42139611	0.431128655	0.446636644	0.448248052	0.453068994	0.340170536	0.167589728	0.266518874
17:18:41.923	0.004419706	0.004679589	0.026065812	0.042498941	0.096762495	0.09694881	0.147939448	0.193869988	0.263500956	0.322610829	0.420608903	0.430342642	0.445815434	0.447435066	0.452293666	0.339618905	0.167323824	0.266083357
17:18:41.988	0.0044295	0.004667485	0.02607915	0.042446653	0.09660236	0.096929718	0.147805742	0.193445584	0.262943541	0.321934846	0.419737284	0.42944527	0.444937535	0.446562208	0.451458386	0.339031203	0.167031509	0.265619678
17:18:42.053	0.004394176	0.004487947	0.025955682	0.042335833	0.096462194	0.096636682	0.147475204	0.19300915	0.262411863	0.3212934	0.418925507	0.428679274	0.444129758	0.445774143	0.450688879	0.338494858	0.166757051	0.265206604
17:18:42.118	0.0043953	0.004285412	0.025858069	0.042269001	0.096296404	0.096620771	0.147132767	0.192660239	0.261934107	0.320733936	0.418163901	0.427943309	0.443385215	0.445047921	0.449957571	0.33796678	0.166503921	0.264800134
17:18:42.184	0.004460578	0.004355614	0.025852272	0.042199859	0.096104746	0.09639615	0.146861344	0.192221473	0.261413169	0.320062783	0.41736877	0.427131572	0.442577434	0.444253592	0.449169802	0.337400185	0.166247842	0.264364825
17:18:42.248	0.004479204	0.004491803	0.025796695	0.042082257	0.095934503	0.096050071	0.146533026	0.191867065	0.260880227	0.319438412	0.416578801	0.42633656	0.441752717	0.443423993	0.448393878	0.336852198	0.166002368	0.263940033
17:18:42.314	0.004476153	0.004626961	0.025792721	0.042013908	0.095767509	0.095698951	0.146305746	0.191478526	0.260378503	0.318811539	0.415808614	0.42555989	0.44095329	0.442673522	0.447625326	0.336306709	0.165748904	0.26352666
17:18:42.378	0.004382062	0.004912205	0.025799982	0.041883456	0.095512207	0.095385224	0.14599356	0.191104181	0.259896468	0.318250485	0.41507803	0.424795313	0.440187915	0.441932792	0.446915786	0.335789479	0.165498344	0.263140908
17:18:42.444	0.004508587	0.005000562	0.025727101	0.041836165	0.095284817	0.095026501	0.145679965	0.190751271	0.259352595	0.317582016	0.414240551	0.42392926	0.439324606	0.441069181	0.446054748	0.335175407	0.165196677	0.26268387
17:18:42.508	0.00446973	0.004750419	0.025695442	0.041735783	0.095111568	0.094710389	0.145421626	0.190360693	0.258784286	0.316952823	0.413389951	0.423049106	0.438430535	0.44018037	0.445194446	0.334536754	0.164886446	0.262194748
17:18:42.574	0.004388646	0.004946096	0.025616863	0.041659404	0.094926287	0.094455536	0.14500901	0.190024421	0.258297843	0.316364199	0.412675982	0.422297576	0.437658979	0.439410552	0.444467003	0.33402963	0.164637062	0.261811363
17:18:42.640	0.004408555	0.004983034	0.025576759	0.04159632	0.094816802	0.094314716	0.144610307	0.18963631	0.257756933	0.315718988	0.411834958	0.421473856	0.436813025	0.438525517	0.443634509	0.333434505	0.164330869	0.261345352
17:18:42.705	0.004421401	0.004846667	0.025492171	0.041507895	0.094569921	0.094093015	0.144347937	0.189317036	0.257254549	0.315124279	0.411092543	0.420729074	0.436062854	0.437748296	0.442898475	0.332918827	0.164084478	0.260928592
17:18:42.771	0.004495742	0.004648569	0.025369009	0.041475505	0.09440572	0.093990118	0.143955687	0.188944323	0.256735381	0.314497916	0.41025321	0.419888143	0.435218779	0.436836293	0.442048892	0.332303237	0.163771204	0.260440373
17:18:42.837	0.004569387	0.004594103	0.025345802	0.041372535	0.094168463	0.093838957	0.143721346	0.188535385	0.256202032	0.31383414	0.409396483	0.419026102	0.434334894	0.435921181	0.441160249	0.331669678	0.16347156	0.259934265
17:18:42.902	0.004548835	0.004580789	0.025233741	0.04131891	0.093940832	0.093662605	0.143435332	0.188147319	0.255662257	0.313166835	0.408553362	0.418178867	0.433464441	0.435050931	0.440324078	0.331068597	0.163179625	0.259478067
17:18:42.968	0.004506768	0.004344364	0.025186003	0.041152233	0.093638125	0.093526026	0.143015856	0.187817727	0.255150928	0.312539962	0.407771155	0.417417137	0.43266018	0.434250435	0.439527388	0.330485687	0.162904626	0.259044565
17:18:43.034	0.004545303	0.004375834	0.025142744	0.04111788	0.093379213	0.093370385	0.142723233	0.187464547	0.254624541	0.311893496	0.406925585	0.41654305	0.431797887	0.433357001	0.43865923	0.32985142	0.162590633	0.258544745
17:18:43.100	0.004559915	0.004385113	0.0250833	0.041075853	0.093115847	0.093091666	0.142396528	0.187059123	0.254054972	0.311164776	0.406004606	0.415630901	0.430834967	0.432388784	0.437716332	0.329184793	0.162256904	0.258024
17:18:43.165	0.004529408	0.0043952	0.024957083	0.040989113	0.092900247	0.09294395	0.141954064	0.186715225	0.253454531	0.310502202	0.405136695	0.414750721	0.429941045	0.431464665	0.436817596	0.328550712	0.161927719	0.257512769
17:18:43.231	0.00448156	0.004396006	0.024810714	0.040904437	0.092726635	0.092885076	0.141543463	0.18629955	0.252881655	0.309784859	0.404186412	0.413799096	0.428969861	0.430491742	0.435829066	0.32784771	0.161550244	0.256947201
17:18:43.297	0.004433872	0.00402523	0.024711172	0.040740346	0.092544001	0.092776348	0.141272417	0.1858922	0.252310698	0.309096707	0.403302265	0.412892311	0.428052549	0.42957053	0.434931957	0.327186752	0.161222072	0.25644365
17:18:43.362	0.004471283	0.003924366	0.024599583	0.040629436	0.092413222	0.092697848	0.140946719	0.185513653	0.251704869	0.30834863	0.402360879	0.41195159	0.427075215	0.428554851	0.433936948	0.326480359	0.160860759	0.255885925
17:18:43.428	0.00441894	0.003809785	0.024566607	0.040525663	0.092246709	0.092556768	0.140688175	0.185072679	0.251142639	0.307686436	0.401476706	0.41107561	0.42617752	0.427701753	0.433051952	0.325835109	0.160521356	0.255387813
17:18:43.493	0.004391804	0.003981657	0.024498311	0.04047864	0.091986713	0.092413563	0.140415919	0.184706917	0.250614961	0.307008735	0.400697758	0.41030788	0.425372147	0.42689279	0.432257579	0.325285486	0.160224121	0.254959713
17:18:43.559	0.004440134	0.004126901	0.024428684	0.040420374	0.091772316	0.092269562	0.140149109	0.18430191	0.250064065	0.306341201	0.399809682	0.409421969	0.42445686	0.425979873	0.431339657	0.324615063	0.159880304	0.254433222
17:18:43.624	0.004399671	0.004104891	0.024387767	0.040268508	0.091543843	0.092188946	0.13980123	0.183887204	0.249487813	0.305645862	0.398922175	0.408510625	0.423513045	0.425061247	0.430414239	0.323932375	0.159543191	0.253886375
17:18:43.690	0.004427609	0.004127081	0.024301356	0.040194003	0.091325596	0.092056082	0.139576769	0.183482524	0.248900037	0.304943237	0.397981216	0.407569701	0.422553898	0.424108631	0.429455473	0.323218828	0.159198233	0.253345798
17:18:43.755	0.004385381	0.004262642	0.02429118	0.040086573	0.091059799	0.091820855	0.139415031	0.183060879	0.2483453	0.30426358	0.397084053	0.406656826	0.421606877	0.423237653	0.42856248	0.32254984	0.158872554	0.252847506
17:18:43.821	0.004303226	0.00420172	0.02421352	0.040001807	0.090889679	0.091640522	0.139078644	0.182710313	0.24782556	0.303609692	0.396251764	0.40582065	0.420767673	0.422379932	0.427747951	0.321965579	0.158576501	0.252396015
17:18:43.886	0.004282192	0.004209564	0.024214332	0.039899333	0.090692966	0.091436323	0.138736657	0.182338197	0.247286735	0.302984583	0.395414986	0.404971841	0.419898146	0.421516868	0.426884754	0.321324327	0.158261735	0.251910705
17:18:43.952	0.00425907	0.004406451	0.024121811	0.039795561	0.090565315	0.091280657	0.138496673	0.18196446	0.246749669	0.302321689	0.394592299	0.40410588	0.419004262	0.420634891	0.42603406	0.320690836	0.157926454	0.251425703
17:18:44.016	0.004183766	0.004759072	0.024051684	0.03968599	0.090375702	0.091079607	0.138267374	0.181498806	0.246187558	0.301610188	0.393701109	0.403198718	0.418060551	0.419670518	0.425087046	0.320007996	0.157581572	0.250888776
17:18:44.082	0.004118737	0.004702588	0.024032138	0.039539835	0.090291965	0.090770655	0.137958822	0.181140467	0.245644253	0.301002298	0.392920919	0.40238786	0.41724482	0.418802381	0.424296836	0.319422572	0.157293843	0.250436084
17:18:44.147	0.004170117	0.00470057	0.02400764	0.039447396	0.090113299	0.090515537	0.137844072	0.180721008	0.245116379	0.300395573	0.392041397	0.401513097	0.416328438	0.417895406	0.423400102	0.31875603	0.15697841	0.249940962
17:18:44.212	0.004137362	0.004531522	0.024013849	0.039337912	0.089877849	0.09012809	0.13758533	0.18032499	0.244614748	0.299793623	0.391256749	0.400745433	0.415525549	0.417083011	0.422640767	0.318173052	0.156705599	0.249508472
17:18:44.277	0.004168672	0.004713077	0.023937913	0.039277952	0.089727338	0.089902409	0.137226158	0.179956952	0.244061963	0.299151478	0.390399432	0.399876311	0.414637932	0.416225814	0.42175466	0.31754717	0.156390146	0.248999554
17:18:44.342	0.004234825	0.004458092	0.023876432	0.039195417	0.08954771	0.089697679	0.136973268	0.179569596	0.243515701	0.298518573	0.389547088	0.39903138	0.413775145	0.41537372	0.420919552	0.316921979	0.156101166	0.248499183
17:18:44.408	0.004260033	0.004399995	0.023845385	0.039149108	0.089319838	0.089425855	0.136668142	0.179214219	0.243014766	0.297889099	0.388759427	0.398217024	0.412921224	0.414467659	0.420082582	0.316322737	0.155830471	0.248017903
17:18:44.473	0.004197895	0.004434289	0.0237551	0.039027133	0.089147549	0.089230936	0.13624968	0.178808559	0.242505766	0.297274151	0.387915928	0.397374733	0.412055742	0.413602947	0.419250307	0.315701478	0.155561242	0.247533335
17:18:44.539	0.004289077	0.004342704	0.023688941	0.038922379	0.08897851	0.089027797	0.136044786	0.178461495	0.24197286	0.296588045	0.387069851	0.396541737	0.411200681	0.412742033	0.41839772	0.315098389	0.155272099	0.247053266
17:18:44.604	0.004350092	0.00427573	0.023352026	0.03885278	0.088912097	0.087923085	0.135453289	0.178143516	0.241378752	0.295994971	0.386251595	0.395661309	0.41037795	0.411882641	0.417551533	0.314499974	0.154974648	0.246594592
17:18:44.670	0.004283779	0.004614633	0.023412688	0.038722685	0.088757255	0.087962603	0.135171513	0.177689205	0.240831545	0.295347396	0.385351534	0.394782482	0.409453051	0.410947124	0.416633079	0.313829838	0.154643053	0.246068769
17:18:44.736	0.004285384	0.004722759	0.023367393	0.038617039	0.088673636	0.088017497	0.134874252	0.177276212	0.240285912	0.2947286	0.384508977	0.393976386	0.408606955	0.410066443	0.415792635	0.313231575	0.154351473	0.245591402
17:18:44.801	0.004344151	0.004834113	0.023273541	0.038570819	0.08845202	0.087911154	0.134709688	0.17684755	0.239738799	0.294110222	0.38365806	0.393112525	0.407732519	0.409192581	0.414916778	0.31260053	0.154041568	0.245098078
17:18:44.866	0.004308987	0.004714915	0.023230381	0.038488323	0.088223306	0.087875882	0.134527982	0.176480481	0.239193698	0.293442506	0.382797761	0.392258026	0.406857302	0.408332072	0.41406311	0.312001609	0.153732965	0.244605171
17:18:44.931	0.004336122	0.004618892	0.023201065	0.038412658	0.088109611	0.087600873	0.13421378	0.176055119	0.238665009	0.292783598	0.381934449	0.391438387	0.406008673	0.407495639	0.413198098	0.311406062	0.153436227	0.244120756
17:18:44.997	0.004390714	0.004525694	0.023215108	0.038287382	0.087984968	0.087598752	0.13396129	0.175754127	0.238171697	0.292240288	0.38119069	0.390677737	0.405228725	0.406736708	0.412472173	0.31087795	0.153196633	0.243702261
17:18:45.062	0.004336283	0.004614051	0.02324656	0.038243214	0.087761668	0.087510972	0.133687018	0.17541051	0.237702894	0.291657748	0.380429137	0.389893329	0.404433972	0.405971236	0.411665093	0.31031758	0.152898593	0.243250544
17:18:45.127	0.004319745	0.004695145	0.023154618	0.038158983	0.087553288	0.087487635	0.133190102	0.175030735	0.237179092	0.290992626	0.379589267	0.38906471	0.403595636	0.40511613	0.410823632	0.309717241	0.152603415	0.242784596
17:18:45.193	0.004225653	0.004909381	0.023161134	0.038070114	0.087312061	0.087390573	0.132980364	0.17465907	0.23665176	0.29038444	0.378807275	0.388247241	0.402774906	0.404298392	0.41001048	0.309153413	0.152321944	0.242343333
17:18:45.258	0.004134774	0.005118775	0.023196759	0.037983294	0.087079751	0.087088517	0.132683506	0.174236254	0.236163269	0.289802509	0.378068221	0.387523692	0.402032958	0.403486117	0.409282114	0.308629839	0.152067127	0.241938481
17:18:45.324	0.004149707	0.005170417	0.023110753	0.037903792	0.086840811	0.086794946	0.132470946	0.173813641	0.235698651	0.289217832	0.377330673	0.386794006	0.40127188	0.402713511	0.408516629	0.308109691	0.151797161	0.241539818
17:18:45.389	0.004102822	0.00528056	0.023045406	0.037822506	0.086668043	0.086764184	0.13233986	0.173503716	0.235188861	0.288605538	0.376556455	0.385998114	0.400461315	0.401923941	0.407718719	0.307523069	0.151508319	0.241096747
17:18:45.454	0.004180375	0.005237793	0.022997262	0.037755189	0.086507909	0.086410149	0.132155128	0.173159705	0.234680836	0.288011955	0.375789308	0.385223115	0.399663591	0.401142186	0.406942671	0.306967221	0.151202759	0.240665666
17:18:45.519	0.004088068	0.00549883	0.022924487	0.037662215	0.086318055	0.086316537	0.131955877	0.172776213	0.2341553	0.287424495	0.37500721	0.384415056	0.398834555	0.400305138	0.406131647	0.306363727	0.15089739	0.240207408
17:18:45.585	0.004071691	0.005886955	0.023133454	0.037537385	0.085989	0.08686805	0.132027267	0.172413683	0.233731882	0.286819716	0.374254206	0.383733573	0.398055933	0.399564491	0.405394877	0.305822489	0.150625737	0.239792807
17:18:45.650	0.004189384	0.005395545	0.023018332	0.037471089	0.085825375	0.086515075	0.131729447	0.172100322	0.233248014	0.286216838	0.373541069	0.38301537	0.397309895	0.398805972	0.404669078	0.30530008	0.150376362	0.239392229
17:18:45.715	0.004086302	0.005298715	0.023026272	0.037403812	0.085583548	0.086162899	0.131311989	0.171811428	0.232801037	0.28561968	0.372871808	0.382320456	0.396601349	0.398118025	0.403975124	0.304794812	0.150133841	0.239014608
17:18:45.780	0.004117933	0.005218024	0.023067295	0.037320651	0.085466001	0.085878349	0.130983873	0.171492074	0.232312231	0.285028782	0.372176149	0.381594153	0.395844027	0.397368109	0.403239466	0.30425074	0.149871376	0.238592544
17:18:45.845	0.004191151	0.005182923	0.022994619	0.037189307	0.085258703	0.085404711	0.130605746	0.171105207	0.23180739	0.284402555	0.371348621	0.380772939	0.394980321	0.396492509	0.402377786	0.303602993	0.149565903	0.238091686
17:18:45.909	0.004118416	0.005241021	0.022927082	0.037144336	0.085092671	0.085240823	0.130319173	0.170771893	0.231345043	0.283860591	0.370647042	0.380057927	0.39426564	0.395738748	0.401677385	0.303091466	0.149336262	0.237709719
17:18:45.975	0.004144909	0.004975547	0.022815321	0.037101507	0.08499173	0.085049885	0.129899498	0.170389081	0.230852016	0.283284547	0.369888739	0.379327201	0.393514813	0.394959316	0.400931993	0.302552506	0.14905764	0.237299283
17:18:46.041	0.00420496	0.004928746	0.022677304	0.037002999	0.084765182	0.085013022	0.129603849	0.169993016	0.230318274	0.282629449	0.36905734	0.378536134	0.392676604	0.39408221	0.400130312	0.301955963	0.14878229	0.236840591
17:18:46.106	0.004067838	0.004772205	0.022641572	0.036917964	0.084641499	0.084853641	0.129424364	0.169676755	0.229842948	0.282037486	0.368340626	0.377777115	0.39188995	0.393320214	0.39938758	0.301403843	0.148514434	0.23640202
17:18:46.172	0.004225994	0.004662869	0.022504774	0.036919837	0.084494236	0.084702098	0.129150498	0.169333201	0.229327584	0.281401957	0.367542698	0.376994174	0.391061142	0.392503338	0.398559436	0.300792066	0.14823941	0.235921084
17:18:46.238	0.004245903	0.004452265	0.022495616	0.036870048	0.084328793	0.084660725	0.129084752	0.169018659	0.228809732	0.280787291	0.36673619	0.376176413	0.390207642	0.391649438	0.397719728	0.30015957	0.147940007	0.235434121
17:18:46.303	0.004092725	0.004413533	0.022536027	0.036797684	0.084182252	0.084570559	0.128847385	0.168687277	0.228295664	0.280166411	0.365963104	0.375371016	0.389393853	0.390840932	0.396942522	0.299574602	0.147667453	0.234988973
17:18:46.369	0.004121627	0.004402237	0.022490532	0.036619318	0.083997212	0.084346468	0.128459037	0.168360358	0.227850735	0.279618865	0.365235965	0.374692735	0.388686931	0.390133728	0.396269819	0.299095232	0.147441061	0.234610548
17:18:46.435	0.004046643	0.004126273	0.022476383	0.036560289	0.083776798	0.08422978	0.128146854	0.168001066	0.227344697	0.279013858	0.364444595	0.373875855	0.387844021	0.389305462	0.395430768	0.29848499	0.147139343	0.234136289
17:18:46.501	0.004078274	0.003844302	0.022451346	0.03646999	0.083625084	0.084056608	0.127642679	0.167616671	0.226847071	0.278374595	0.36363277	0.373061662	0.387001065	0.388445373	0.394587946	0.297879809	0.146842965	0.23365846
17:18:46.566	0.004051781	0.003425919	0.022439739	0.036455536	0.083481551	0.08401524	0.127272009	0.16719935	0.226312431	0.277723308	0.362804463	0.372190374	0.386114481	0.387527555	0.393699522	0.297221449	0.146526714	0.233159725
17:18:46.632	0.004015493	0.003457791	0.02235567	0.03638344	0.083340666	0.083898817	0.126988862	0.166795429	0.225813953	0.277074804	0.361961853	0.371322454	0.385223952	0.386680804	0.392821129	0.296593408	0.146199288	0.232670757
17:18:46.698	0.004085499	0.003323441	0.022254291	0.036300012	0.083176198	0.083612672	0.126690394	0.166395567	0.225292639	0.276446029	0.361120908	0.370479101	0.384354549	0.385776946	0.39196981	0.295983705	0.145872896	0.232176521
17:18:46.763	0.004030907	0.002984538	0.022186095	0.036171702	0.082963606	0.083558304	0.126466541	0.165998248	0.224804679	0.275819947	0.360309101	0.369650918	0.383503246	0.384947722	0.391122339	0.295371202	0.145571148	0.231690579
17:18:46.829	0.003954318	0.003090243	0.02220849	0.036138331	0.082862663	0.083604716	0.126108172	0.165621145	0.224344092	0.275272363	0.35961005	0.368932445	0.382786157	0.384199499	0.390392268	0.294864129	0.145327046	0.231292819
17:18:46.894	0.003948537	0.003095488	0.022163048	0.036088988	0.082581974	0.083320161	0.125791349	0.165294987	0.223811026	0.274645953	0.358770925	0.368077491	0.381909692	0.383297148	0.389524861	0.294248353	0.145030505	0.230791355
17:18:46.960	0.003893304	0.003162462	0.022184118	0.036005649	0.082328954	0.083032956	0.125721774	0.164982441	0.223364802	0.27407734	0.358077468	0.367364368	0.381155365	0.382549809	0.388811424	0.293734903	0.144784121	0.230400842
17:18:47.025	0.003936657	0.003216928	0.022163354	0.03598477	0.082195528	0.082737795	0.125607427	0.164652415	0.222924643	0.273546001	0.357365463	0.366628859	0.380407143	0.381813748	0.388076611	0.293216712	0.144530358	0.229987551
17:18:47.091	0.003939065	0.003228628	0.022115922	0.035867248	0.081954783	0.082582124	0.125379539	0.164255924	0.222414321	0.272941694	0.356558448	0.365850137	0.379571315	0.380975651	0.387249938	0.292619056	0.144226908	0.229509948
17:18:47.156	0.003893626	0.003132202	0.022130983	0.035709671	0.081808242	0.082386793	0.125111519	0.16390976	0.22192873	0.272374289	0.355768506	0.365072583	0.378762377	0.380160094	0.386445049	0.292033378	0.143908851	0.229053723
17:18:47.221	0.003901814	0.003220155	0.022014742	0.035617856	0.081615019	0.082127699	0.124759606	0.163562976	0.221408644	0.271715259	0.35489627	0.364187283	0.377831974	0.379279099	0.385523543	0.291366094	0.143548289	0.228522588
17:18:47.287	0.004032193	0.003498137	0.021933921	0.035558699	0.081341789	0.081977338	0.124257652	0.16322293	0.220915518	0.271083929	0.354063848	0.363337142	0.376948403	0.378374574	0.384618422	0.290706283	0.143204608	0.227986682
17:18:47.352	0.003933767	0.003672833	0.021877431	0.035541923	0.081215701	0.081746352	0.123969195	0.162788626	0.220382865	0.270430649	0.353184454	0.362411871	0.375991408	0.377398864	0.383654163	0.289970989	0.142825532	0.227415422
17:18:47.417	0.003949021	0.003779748	0.021743788	0.035467952	0.081140265	0.081506619	0.123732634	0.162389866	0.219859187	0.269786085	0.352335982	0.361556717	0.375120257	0.376509821	0.382759073	0.289311061	0.142518422	0.22689521
17:18:47.482	0.003852843	0.003829732	0.021723429	0.035422089	0.08089242	0.08130295	0.123638456	0.162068039	0.219381812	0.269224613	0.351544075	0.360766734	0.374299969	0.375689558	0.381955389	0.288710334	0.142238332	0.226422053
17:18:47.548	0.003876125	0.003957224	0.021599356	0.035339107	0.080698836	0.081192893	0.12342166	0.161773025	0.218945481	0.268658501	0.350796255	0.360022673	0.373518967	0.374926191	0.381197165	0.28815818	0.141963223	0.225970761
17:18:47.612	0.003922528	0.004292093	0.021944303	0.035266742	0.080458572	0.082390777	0.123817336	0.161458417	0.218558385	0.268116902	0.350094734	0.359345246	0.372760909	0.374195952	0.380464668	0.287597979	0.141695211	0.225534557
17:18:47.677	0.003907435	0.004328	0.021817887	0.035157171	0.080306376	0.082100652	0.123521687	0.16108692	0.218014513	0.267451735	0.34919529	0.358419554	0.371800711	0.373268806	0.37946969	0.286847585	0.14132967	0.224952437
17:18:47.742	0.003836787	0.004548287	0.021716994	0.035085432	0.080139381	0.081677107	0.123072972	0.160712293	0.217467652	0.266796781	0.348314019	0.357542465	0.370868004	0.372316235	0.378529515	0.286138696	0.1409728	0.224413189
17:18:47.808	0.00385022	0.004814209	0.021606963	0.034982553	0.079856861	0.081223889	0.122735175	0.160241688	0.216814828	0.265993183	0.347228964	0.356439537	0.369681503	0.371178656	0.37732553	0.285208097	0.140478184	0.22369557
17:18:47.874	0.003879282	0.004743201	0.021519626	0.034832918	0.079661473	0.080994494	0.122331833	0.159703775	0.216120516	0.265087646	0.34604004	0.355174488	0.368337752	0.36989812	0.375923898	0.284102103	0.13992241	0.222825321
17:18:47.939	0.003827099	0.004736747	0.021394427	0.034751364	0.079370197	0.080693762	0.121819391	0.159112098	0.215291738	0.26399355	0.344563275	0.353602939	0.366688259	0.368285282	0.374158115	0.282728122	0.139239122	0.221709527
17:18:48.005	0.003765442	0.004675018	0.021317473	0.03458888	0.079060872	0.080338667	0.121226483	0.158410969	0.214340518	0.262771519	0.342906307	0.351825432	0.36482023	0.366448786	0.372161149	0.281166698	0.138446102	0.220453816
17:18:48.071	0.003804298	0.004656459	0.021258641	0.034501268	0.078751429	0.079827906	0.120702748	0.157669482	0.213331213	0.261467172	0.341089482	0.349886398	0.36276262	0.364355256	0.369944237	0.27944071	0.137583997	0.219067485
17:18:48.136	0.003828222	0.004861414	0.021070138	0.034393749	0.07834393	0.079377869	0.120024107	0.156781553	0.212198316	0.259936938	0.338996207	0.347635189	0.360377394	0.361939622	0.367356492	0.277415421	0.136587808	0.21742473
17:18:48.202	0.003767368	0.004843662	0.020991865	0.03426062	0.078004649	0.078999172	0.119320681	0.155846943	0.210881985	0.258237302	0.336652047	0.345131223	0.357714768	0.359229998	0.364437676	0.275106133	0.13544516	0.215557264
17:18:48.267	0.003668782	0.004657265	0.020872164	0.03407333	0.07760473	0.078271476	0.118759837	0.154822475	0.209416129	0.256371681	0.333983631	0.342297431	0.354663299	0.356173632	0.361104507	0.272462086	0.134121184	0.213419577
17:18:48.333	0.003651441	0.004216691	0.020755924	0.033839643	0.077119629	0.077703961	0.117913229	0.153670748	0.207809407	0.254291359	0.331098533	0.339187664	0.351326883	0.352836156	0.35742861	0.269570169	0.132667361	0.211045046
17:18:48.398	0.003623021	0.004236057	0.02067867	0.033596944	0.076472348	0.077228467	0.117064605	0.152408399	0.206057381	0.25197527	0.327848123	0.335706932	0.347566657	0.349049199	0.353302617	0.266286857	0.130999122	0.208364731
17:18:48.462	0.003665249	0.003942745	0.020491278	0.033374141	0.0759153	0.076547714	0.11588282	0.150979464	0.204100164	0.249415702	0.324246897	0.331804874	0.343378299	0.344918766	0.348674933	0.262595212	0.129121825	0.2053621
17:18:48.528	0.003638114	0.0041126	0.020363538	0.033133226	0.075329378	0.075681057	0.114870036	0.149468853	0.202009049	0.246671049	0.320337824	0.327593599	0.338828997	0.340356235	0.343639531	0.258571597	0.1270891	0.202085688
17:18:48.594	0.003539688	0.003590528	0.019822041	0.032903108	0.07468763	0.073520519	0.112993096	0.147833045	0.199636165	0.24365381	0.31603575	0.322913136	0.333833933	0.335319375	0.338073144	0.254128845	0.124841556	0.198459502
17:18:48.659	0.003513677	0.003787011	0.019728901	0.032668171	0.073965874	0.073050331	0.111871407	0.146127415	0.197203344	0.240466569	0.311503679	0.318007017	0.328527371	0.329976003	0.33219384	0.249423632	0.122463322	0.194625274
17:18:48.724	0.00344046	0.003552199	0.019614005	0.032383316	0.073198161	0.072385784	0.110615206	0.144329146	0.194646476	0.237092488	0.306647092	0.312773918	0.322890312	0.324281566	0.325916081	0.244387158	0.119895391	0.190513119
17:18:48.790	0.003411933	0.003670367	0.019490337	0.032124734	0.072494479	0.071663127	0.109227516	0.142464324	0.191966567	0.233542564	0.301550883	0.307253605	0.316949281	0.318272479	0.319274625	0.239047043	0.117187562	0.186162935
17:18:48.856	0.003452235	0.003538034	0.019301016	0.031830728	0.071662037	0.070927745	0.107823694	0.14050222	0.18919188	0.229923566	0.296305706	0.301604426	0.310793897	0.312100385	0.312415179	0.233560401	0.114384038	0.181700906
17:18:48.921	0.003566075	0.003236248	0.019093985	0.031505224	0.070898052	0.070138525	0.106360375	0.138480165	0.186338282	0.226174587	0.290893659	0.295736844	0.304402384	0.305735235	0.305267071	0.227845754	0.111475628	0.17707809
17:18:48.987	0.003551624	0.003360109	0.018869144	0.03118909	0.070064768	0.069349307	0.104886572	0.136398708	0.183402947	0.222278172	0.285330142	0.289701554	0.297812926	0.299182079	0.297907171	0.221908216	0.108466604	0.172295741
17:18:49.052	0.003497674	0.003349754	0.018680641	0.030832804	0.069235092	0.068695071	0.103383124	0.13432715	0.180424555	0.218365839	0.27973015	0.283611905	0.291187198	0.292639901	0.290490636	0.215898269	0.105406488	0.167465235
17:18:49.118	0.003450147	0.003101628	0.018548621	0.030511226	0.06844151	0.067845123	0.101926486	0.132223623	0.177410677	0.214417295	0.274050546	0.277424051	0.284449352	0.285970668	0.282947278	0.20977182	0.102295495	0.162550436
17:18:49.183	0.003438105	0.003174654	0.018349523	0.030133168	0.067502351	0.06690713	0.100305668	0.130051926	0.174384557	0.210431248	0.26827857	0.271130967	0.277609026	0.279201415	0.275278337	0.203548147	0.099153434	0.157541587
17:18:49.249	0.003359911	0.003294481	0.018127125	0.029773668	0.066652704	0.066234862	0.098650764	0.12784314	0.171323823	0.206384522	0.262458604	0.264776733	0.270739617	0.272384594	0.267566758	0.197270401	0.095967329	0.152479372
17:18:49.313	0.003382711	0.003529696	0.01789302	0.029479038	0.065788257	0.065615339	0.097176356	0.125584715	0.168208338	0.202261109	0.256499726	0.258280538	0.263723485	0.265401701	0.259699535	0.19084268	0.092715584	0.147300455
17:18:49.379	0.003343212	0.003223473	0.017716929	0.029129889	0.065014046	0.064843091	0.09559748	0.123369948	0.165092636	0.198138944	0.250550772	0.251777799	0.256720533	0.258370334	0.251806893	0.184398248	0.089462311	0.142105802
17:18:49.444	0.003272439	0.003163761	0.017414628	0.028777617	0.064145872	0.064120965	0.094149086	0.121157312	0.161958411	0.19392821	0.244552749	0.245229525	0.249669143	0.251226599	0.24387622	0.177916324	0.086197251	0.136894004
17:18:49.510	0.003167911	0.002977365	0.017232681	0.028384568	0.063309339	0.063516058	0.092586546	0.118911606	0.158782069	0.189727919	0.238508617	0.238623524	0.242590405	0.244127868	0.235897761	0.171390644	0.082886739	0.131643849
17:18:49.575	0.003263126	0.003296498	0.017041522	0.028010881	0.062523699	0.062571699	0.091062325	0.116673119	0.155616502	0.185478754	0.232468872	0.232013689	0.235495788	0.237020407	0.227917719	0.164844667	0.079564347	0.126377862
17:18:49.641	0.003160204	0.003002783	0.01684864	0.027646743	0.061658291	0.061637418	0.089317479	0.11445196	0.152506214	0.1812638	0.226455957	0.225428743	0.228457599	0.22999197	0.219989859	0.158317598	0.076264449	0.121131977
17:18:49.707	0.003264089	0.003256153	0.016601711	0.027292993	0.06086146	0.06070632	0.087690607	0.112209967	0.149364491	0.177037284	0.220404324	0.218773684	0.221358004	0.22289694	0.211987107	0.151740687	0.072966117	0.115849298
17:18:49.773	0.003232136	0.00293944	0.016338796	0.026910027	0.060034553	0.060000638	0.086194825	0.1099853	0.146236253	0.172849581	0.214423246	0.212192687	0.214361523	0.215900057	0.204109709	0.145258628	0.069689434	0.110641797
17:18:49.838	0.003165823	0.002997941	0.016153547	0.02656534	0.059203794	0.059170844	0.084648419	0.107776998	0.143129463	0.168637455	0.2083693	0.205592756	0.207386725	0.208860598	0.196230057	0.138738755	0.066369881	0.105420634
17:18:49.904	0.003059529	0.00322307	0.015995579	0.026233591	0.058376404	0.058462509	0.083090991	0.10562287	0.140004183	0.164467853	0.202354315	0.199018077	0.200505569	0.201882695	0.188443654	0.132285303	0.063073267	0.100234426
17:18:49.968	0.003015856	0.003066529	0.015830582	0.025867043	0.057574159	0.05773455	0.081579877	0.103536462	0.136919761	0.160355582	0.196420222	0.192487539	0.193687403	0.194942611	0.180752197	0.125920326	0.059849296	0.095131862
17:18:50.034	0.003061616	0.003223339	0.015574282	0.025555815	0.056805601	0.05680186	0.080049606	0.101402685	0.133901831	0.156226594	0.190490966	0.185955755	0.186923009	0.188029285	0.173091187	0.119600575	0.056636247	0.090040078
17:18:50.099	0.00299434	0.003240285	0.015424453	0.025174545	0.056004199	0.056013702	0.078476985	0.099268771	0.130878612	0.152131969	0.184617954	0.179476079	0.180218288	0.181182417	0.165513659	0.113348461	0.053438301	0.085007486
17:18:50.164	0.002876967	0.003133772	0.01519289	0.024906147	0.055293124	0.055326847	0.077073766	0.097198833	0.127919222	0.148119689	0.178885119	0.173153958	0.17366955	0.17447568	0.158118506	0.107251717	0.050316712	0.08009228
17:18:50.230	0.002851919	0.002913889	0.014994611	0.024603844	0.054529979	0.054577938	0.075612872	0.095169488	0.124992294	0.144145941	0.173206189	0.166915079	0.167196221	0.167875691	0.150809915	0.101218023	0.047232079	0.075264879
17:18:50.295	0.002767782	0.002829521	0.014830632	0.024360341	0.053737361	0.053710781	0.073928121	0.09325166	0.122140529	0.140294278	0.167682565	0.160846866	0.160916785	0.161474701	0.143689744	0.095362221	0.044228403	0.070590882
17:18:50.361	0.002731816	0.003028022	0.01464386	0.024041738	0.052981677	0.052851551	0.072345618	0.091309907	0.119339629	0.136568746	0.162287477	0.154913463	0.154780911	0.155238577	0.136767737	0.089656195	0.041300322	0.066029179
17:18:50.426	0.002700471	0.003301161	0.014623402	0.023761474	0.052241032	0.052047216	0.070940584	0.089388022	0.116629953	0.1329867	0.157070045	0.149169522	0.14882993	0.149251574	0.130064447	0.084127163	0.038454811	0.061591051
17:18:50.492	0.002618262	0.003057877	0.014436988	0.023499769	0.051622264	0.051155897	0.06966845	0.087601991	0.1140115	0.129461474	0.152044704	0.143629214	0.143087559	0.143419198	0.123588192	0.078802858	0.035728389	0.057311897
17:18:50.558	0.002473433	0.003005428	0.014264158	0.023267777	0.050783563	0.050473816	0.068455206	0.085818159	0.111489751	0.126109164	0.147170476	0.138263494	0.137552414	0.137781105	0.117344295	0.073685214	0.033103209	0.053201677
17:18:50.623	0.002433292	0.00299171	0.013824547	0.022966454	0.050110656	0.048861698	0.066755736	0.084091253	0.108961232	0.122886509	0.14245156	0.133041795	0.132186303	0.132287029	0.111302897	0.068756951	0.030584328	0.049240906
17:18:50.688	0.00237003	0.002871883	0.013723374	0.022745794	0.049440274	0.048656968	0.065650587	0.082444237	0.106582522	0.119733439	0.137913472	0.128081855	0.127005448	0.127050085	0.105525431	0.06402803	0.028161597	0.045447039
17:18:50.753	0.002386729	0.002596726	0.013612324	0.022483821	0.048767125	0.048114115	0.064536762	0.080856622	0.104326063	0.116759458	0.13360865	0.123379572	0.122056019	0.122032532	0.100012864	0.059530815	0.025884765	0.041842366
17:18:50.818	0.002277706	0.002501107	0.013551662	0.022294925	0.048261811	0.047502311	0.063565119	0.079329775	0.102167092	0.113880783	0.129541415	0.118861449	0.117322457	0.117242551	0.094776666	0.055258889	0.023731613	0.038423484
17:18:50.883	0.002155196	0.002434133	0.01345751	0.022019211	0.047703681	0.046892452	0.062484507	0.077849483	0.100124514	0.111159846	0.125662074	0.114636343	0.112843966	0.112688612	0.089826034	0.051230169	0.021702728	0.035202564
17:18:50.949	0.002106223	0.002399436	0.013290783	0.021824783	0.047199091	0.046274283	0.061392466	0.076419515	0.098216527	0.108619674	0.122003912	0.110685951	0.108652468	0.108485559	0.085173998	0.047466517	0.019791638	0.032171898
17:18:51.013	0.002054843	0.002372808	0.013204066	0.021661675	0.04665925	0.045867476	0.060486968	0.075107458	0.096431043	0.106282043	0.118651775	0.107036048	0.104752875	0.104558149	0.080879747	0.044004646	0.018047919	0.029394713
17:18:51.078	0.002079552	0.002372001	0.013095359	0.021458503	0.046200138	0.045509993	0.059727276	0.074002962	0.094784159	0.104148567	0.115611039	0.103762991	0.101243924	0.101040295	0.077018908	0.040908616	0.016487583	0.026893383
17:18:51.143	0.002138962	0.002145662	0.013037445	0.021299142	0.045721682	0.045073483	0.058952259	0.072934836	0.093341945	0.102235917	0.112863237	0.100805358	0.098079874	0.097885301	0.073548596	0.038119381	0.015091308	0.024677415
17:18:51.209	0.002238993	0.001940303	0.012986652	0.02114924	0.04532044	0.044722101	0.058429528	0.071976644	0.092018498	0.100531047	0.110429656	0.098164937	0.095281113	0.095052237	0.070482415	0.035683713	0.013868103	0.022715614
17:18:51.274	0.002170914	0.001944382	0.012876102	0.020930899	0.045022907	0.044315822	0.058027399	0.071096073	0.090841521	0.098982807	0.108254466	0.095830394	0.0927653	0.092513694	0.067769881	0.033525594	0.012788857	0.020981736
17:18:51.340	0.002141049	0.002044843	0.012816658	0.020862789	0.044622627	0.044157766	0.057605306	0.070332104	0.089826988	0.097598329	0.106327205	0.093762576	0.090545357	0.090293027	0.065386058	0.031644367	0.01185975	0.019482585
17:18:51.406	0.002191145	0.002104958	0.012745813	0.020677463	0.044416652	0.04402729	0.057134407	0.069694363	0.08890837	0.096372113	0.104645157	0.09196239	0.088616207	0.088316263	0.063319322	0.030032615	0.01106308	0.018207414
17:18:51.471	0.002171717	0.002031529	0.012707844	0.020571817	0.044044885	0.04385677	0.056703843	0.06907546	0.088096349	0.095330096	0.103173933	0.090418529	0.086946493	0.086650499	0.061562585	0.028659777	0.010381941	0.017123521
17:18:51.537	0.001999271	0.00198957	0.01268891	0.020434941	0.043914346	0.043667421	0.056126662	0.068614274	0.087392211	0.094444565	0.10192921	0.089112176	0.085519993	0.085244189	0.060085799	0.027511301	0.00983282	0.016230167
17:18:51.603	0.002037324	0.001999522	0.012919148	0.020455285	0.043759503	0.044456375	0.056352128	0.068179694	0.086860497	0.093687806	0.100900103	0.088091883	0.084358938	0.084115634	0.058882592	0.026577015	0.009361194	0.015510351
17:18:51.667	0.002050972	0.002259751	0.012853594	0.020385688	0.043560386	0.04389098	0.056051797	0.067808574	0.086371278	0.093075371	0.100063673	0.087224614	0.083451662	0.083165623	0.057917559	0.025852242	0.009002982	0.014956849
17:18:51.734	0.001934723	0.002573237	0.01279568	0.020314484	0.043504922	0.043637454	0.055838431	0.067504967	0.085977122	0.092551508	0.09940893	0.086529722	0.082756504	0.082453253	0.057201701	0.025328764	0.008744557	0.014546774
17:18:51.800	0.001935366	0.002641017	0.012704683	0.020247384	0.04331892	0.043533763	0.055529069	0.067275068	0.085666097	0.092182366	0.098906028	0.086046316	0.082266229	0.081943718	0.056687081	0.024973406	0.008590766	0.014269523
17:18:51.865	0.002004408	0.002618424	0.012610937	0.020219099	0.043213405	0.043318602	0.055508699	0.067068333	0.085416621	0.091864242	0.098568734	0.085674634	0.081912681	0.081591923	0.056350998	0.024754911	0.008490836	0.014110466
17:18:51.931	0.002076984	0.00261681	0.012664173	0.020168061	0.043113786	0.04335732	0.055414924	0.066970705	0.085212287	0.091609157	0.098333036	0.085419529	0.081677983	0.081296631	0.056149501	0.024638756	0.008454531	0.014021797
17:18:51.996	0.002035398	0.002557906	0.012658982	0.020067114	0.043056156	0.043290756	0.05517897	0.066873353	0.085009429	0.091390095	0.098108042	0.085233524	0.081496089	0.081122015	0.05602051	0.024566251	0.008430254	0.01397344
17:18:52.062	0.002015345	0.002778597	0.012628754	0.020074788	0.043018499	0.0429346	0.05500493	0.066693636	0.084859552	0.091175164	0.097907485	0.085038579	0.081322331	0.080927091	0.055896123	0.024501829	0.008416315	0.013951618
17:18:52.127	0.001909372	0.002921823	0.012526762	0.020064348	0.04298048	0.042993208	0.054938986	0.066539219	0.084679598	0.09097077	0.097697864	0.08487455	0.081149648	0.08072883	0.055772203	0.024447324	0.008377019	0.013916269
17:18:52.193	0.001865538	0.003098134	0.012476275	0.020047573	0.042944748	0.042957406	0.054715334	0.066455481	0.084519704	0.090772784	0.097516745	0.084708195	0.080976333	0.080551652	0.055657978	0.0243918	0.008358622	0.013891002
17:18:52.259	0.001989654	0.003120324	0.012436384	0.020008402	0.042840676	0.042812875	0.054704444	0.06638934	0.084391627	0.090597032	0.097316294	0.084534753	0.080794961	0.080382173	0.055541183	0.024341198	0.008350958	0.013855653
17:18:52.324	0.002053559	0.00328332	0.012379994	0.019967536	0.042829488	0.042731461	0.054555208	0.066287313	0.084208829	0.090410755	0.09714668	0.08438345	0.080622596	0.080221459	0.055435306	0.024298226	0.0083214	0.013824281
17:18:52.390	0.001983553	0.002984762	0.012317195	0.0199786	0.042740817	0.04250525	0.054417468	0.066164797	0.08404976	0.090242246	0.096948595	0.084245686	0.080478844	0.080071082	0.055329611	0.024251486	0.008295623	0.013797469
17:18:52.455	0.00202241	0.003303896	0.012275973	0.019943712	0.042667548	0.042383584	0.05424504	0.066044	0.083912389	0.090095183	0.096757821	0.084082829	0.080335241	0.079909362	0.055227745	0.024211789	0.008281907	0.013789837
17:18:52.521	0.002147168	0.003418074	0.012221619	0.019929525	0.042619543	0.042353087	0.054329742	0.065933654	0.083769412	0.089909313	0.096588102	0.08394021	0.080196191	0.079778514	0.055134294	0.024176935	0.008266536	0.013761304
17:18:52.586	0.002138177	0.003291523	0.012155972	0.019826467	0.042535566	0.042267164	0.054229917	0.065849639	0.083622374	0.089717639	0.096408943	0.083772321	0.080046936	0.079617527	0.055037319	0.024145259	0.008264547	0.013733677
17:18:52.652	0.002097714	0.002902995	0.012175113	0.019789437	0.042516757	0.042262656	0.054110168	0.065733724	0.083473694	0.089553678	0.096250077	0.083598225	0.079892028	0.079512966	0.054946486	0.02411621	0.008247728	0.013702304
17:18:52.717	0.002153413	0.002791641	0.012152718	0.019758564	0.042393677	0.04203724	0.05405108	0.065614028	0.08332631	0.089406755	0.096075086	0.083448027	0.079757747	0.079354997	0.054856017	0.024084802	0.008251835	0.013684372
17:18:52.781	0.002219886	0.003004262	0.012140605	0.019724301	0.042362997	0.041741018	0.05392342	0.065510627	0.083168971	0.089263034	0.095897328	0.083277476	0.079613342	0.079217381	0.054775795	0.024060418	0.008250095	0.013675477
17:18:52.847	0.002237709	0.003082129	0.012164524	0.019694856	0.042236789	0.041769924	0.053763697	0.06541568	0.083041492	0.089126695	0.095716747	0.083143841	0.079487559	0.079121794	0.054699031	0.024040255	0.008252058	0.01366838
17:18:52.913	0.002185204	0.003013227	0.012091343	0.01962847	0.042144629	0.041458586	0.053693312	0.065236308	0.082902046	0.089013288	0.095547538	0.083011989	0.079359368	0.079026142	0.054641809	0.02403834	0.008247643	0.013684835
17:18:52.978	0.002135911	0.00282683	0.012372068	0.019602624	0.042099392	0.042359983	0.054235197	0.065155731	0.082872629	0.088890504	0.09546702	0.083011264	0.079326681	0.07898937	0.05467393	0.024108641	0.00829294	0.013750322
17:18:53.044	0.002049849	0.002509714	0.012222851	0.019538915	0.042036347	0.042248336	0.054236003	0.065127474	0.082813377	0.088886419	0.095494444	0.083076908	0.079436945	0.079089392	0.054840925	0.024291557	0.008389004	0.013902178
17:18:53.109	0.002171878	0.002530694	0.012286841	0.019430593	0.042004223	0.041943362	0.054158964	0.065167419	0.082860279	0.088941568	0.095662097	0.08326736	0.079704223	0.079354747	0.055207275	0.024625259	0.008596793	0.014187585
17:18:53.175	0.002155019	0.002227295	0.012278801	0.019442639	0.042015171	0.041755074	0.054186996	0.065233557	0.082994498	0.089142479	0.095978714	0.083653146	0.080160443	0.079823119	0.055800147	0.025143133	0.008883201	0.01463014
17:18:53.241	0.002114557	0.002128852	0.012330612	0.019411052	0.042075448	0.041874677	0.054118831	0.065309321	0.083161447	0.089445285	0.096506508	0.08423221	0.08084533	0.080491218	0.056641433	0.025846929	0.009269059	0.015233902
17:18:53.306	0.002050492	0.001869026	0.012339264	0.019401772	0.042125377	0.041763826	0.054336836	0.06550877	0.08346073	0.089885126	0.097200528	0.085012107	0.081765382	0.081419879	0.057723079	0.026753968	0.009747706	0.016002126
17:18:53.372	0.002067833	0.001861764	0.012325621	0.019397578	0.042193474	0.041736776	0.05452822	0.065800965	0.083874033	0.090478574	0.098128119	0.086026732	0.082917727	0.082596324	0.059100111	0.027898036	0.010345656	0.01695362
17:18:53.437	0.002122425	0.001614849	0.012301496	0.019484932	0.042278172	0.04187011	0.054842042	0.066193951	0.084396674	0.091236994	0.099283505	0.087290934	0.084348925	0.084021157	0.060790627	0.029295866	0.011061539	0.018110619
17:18:53.503	0.002213786	0.001731044	0.012391681	0.019531331	0.042396561	0.042079348	0.055185486	0.066646268	0.085072309	0.092178138	0.100693754	0.08881927	0.086095674	0.085736636	0.06282295	0.030977411	0.011925855	0.019509328
17:18:53.567	0.002265648	0.001936403	0.012247752	0.019645275	0.042562471	0.040993377	0.055157655	0.06716328	0.085818688	0.093320519	0.102361126	0.090579989	0.088155122	0.087798879	0.065188579	0.03293686	0.012944853	0.021127086
17:18:53.633	0.00232024	0.001973924	0.012252331	0.019696006	0.042777269	0.041552937	0.055632185	0.067842066	0.086749058	0.094585174	0.104277965	0.092699796	0.090507343	0.09012772	0.067920893	0.035178163	0.014097309	0.022980217
17:18:53.697	0.002332139	0.002180493	0.012319616	0.019847247	0.043033535	0.042070862	0.056198069	0.06866131	0.087820763	0.096047675	0.106467862	0.0951235	0.09318173	0.092849965	0.071035473	0.03773142	0.0153986	0.025083456
17:18:53.763	0.00243474	0.001998535	0.012382414	0.019942453	0.043263452	0.042721915	0.056987809	0.06952428	0.089057622	0.097721811	0.108958837	0.097861069	0.096205933	0.09589195	0.074536568	0.040600698	0.016867728	0.0274415
17:18:53.828	0.002414187	0.002027584	0.012448681	0.020081559	0.043615847	0.043001695	0.057681351	0.070474979	0.090416947	0.099580612	0.11174874	0.100891747	0.099566367	0.099227732	0.078425812	0.043782577	0.018513207	0.030045015
17:18:53.894	0.002354778	0.001987956	0.012565121	0.020206121	0.044008909	0.04358141	0.058482587	0.071598427	0.09193692	0.101653088	0.114801813	0.104243036	0.103281866	0.102940374	0.082687551	0.047273332	0.020313874	0.032913802
17:18:53.959	0.002458985	0.001867322	0.012359208	0.020380919	0.04439475	0.043017165	0.058793561	0.072757167	0.093501746	0.10391487	0.118087897	0.107786723	0.107241765	0.10695369	0.087255715	0.05103064	0.022249421	0.036006348
17:18:54.025	0.002500731	0.001768476	0.012525322	0.020590961	0.044825229	0.043817257	0.059753306	0.07395874	0.095225114	0.106284443	0.12156069	0.111608534	0.111410868	0.111179251	0.092093965	0.055002403	0.024295124	0.039266733
17:18:54.090	0.002470384	0.001718447	0.012686685	0.020838479	0.045282537	0.04440042	0.06070539	0.075274647	0.09700313	0.108748069	0.125203769	0.115618768	0.115792614	0.115585146	0.09714636	0.059158566	0.026411072	0.042653116
17:18:54.156	0.002402144	0.002223709	0.012801096	0.021028534	0.045700383	0.04496608	0.061691555	0.076572473	0.098869691	0.111271524	0.128979819	0.119785519	0.120318616	0.120162959	0.102362062	0.063454394	0.028614913	0.046165332
17:18:54.221	0.002478412	0.002372584	0.01291693	0.021299876	0.046135192	0.045642061	0.062717853	0.077990133	0.10080709	0.113900822	0.132845154	0.124110885	0.124999357	0.124895812	0.107762888	0.067916137	0.0308688	0.049807686
17:18:54.287	0.002606382	0.002572295	0.013034694	0.021482792	0.046641588	0.046249886	0.063709867	0.079399543	0.102793538	0.116603606	0.136825848	0.128546417	0.129827432	0.129721862	0.113308369	0.07252429	0.033210068	0.053554841
17:18:54.351	0.002732103	0.002820824	0.013156738	0.021729686	0.047109003	0.046853203	0.0647281	0.080791969	0.104806823	0.119351278	0.140892091	0.133063457	0.13475411	0.134630203	0.118960502	0.077255239	0.035618792	0.057402584
17:18:54.417	0.002777382	0.002780882	0.013312065	0.021918939	0.047670865	0.047353095	0.065581141	0.082245311	0.106885594	0.122123565	0.145051191	0.137703324	0.139766086	0.139642408	0.124693258	0.082065192	0.038071725	0.061307321
17:18:54.481	0.002774652	0.002432699	0.013361633	0.02214531	0.048244153	0.047700235	0.066543305	0.08369824	0.108961748	0.124947643	0.149252312	0.142415922	0.144833499	0.144717087	0.130514049	0.086944788	0.040544469	0.065290629
17:18:54.547	0.002719579	0.002245496	0.013639205	0.022318948	0.048783756	0.049489503	0.06811653	0.085177158	0.111137945	0.127774048	0.153485857	0.14721553	0.149928493	0.149835717	0.136399713	0.091870537	0.043043728	0.069298262
17:18:54.613	0.002776419	0.002640076	0.013740478	0.022527066	0.049344894	0.049654719	0.069162795	0.086677114	0.113305359	0.130702995	0.15781261	0.152056978	0.155128589	0.155065408	0.142369171	0.096882496	0.045595639	0.073362662
17:18:54.678	0.002774653	0.002497657	0.013804601	0.022705254	0.049911444	0.050120931	0.070142911	0.08812475	0.11545935	0.133618202	0.162108605	0.15687299	0.160328747	0.160296321	0.148315362	0.101894189	0.048150972	0.077420715
17:18:54.744	0.002651018	0.002668319	0.013924815	0.02291601	0.0505023	0.050626922	0.071179495	0.089689056	0.117602507	0.136535176	0.166458315	0.1617405	0.165550833	0.165555768	0.1543025	0.106940863	0.050737291	0.081498891
17:18:54.810	0.00267141	0.002805897	0.013989344	0.023097857	0.051067771	0.051222814	0.072086605	0.091238788	0.119773704	0.139484968	0.170788403	0.166638157	0.170774629	0.170829805	0.160304184	0.112006607	0.053329673	0.085601121
17:18:54.875	0.002743985	0.002855119	0.014065686	0.023334399	0.051646113	0.051675767	0.073133273	0.09272481	0.121936798	0.142398268	0.175179655	0.171571488	0.176017213	0.176117105	0.166340493	0.1171003	0.055930328	0.089717534
17:18:54.941	0.002752655	0.003369121	0.014137543	0.023569157	0.052165503	0.052262554	0.07427029	0.094234667	0.12411681	0.145377213	0.179540923	0.176502564	0.181254674	0.181344203	0.172347814	0.12218387	0.058526705	0.093806689
17:18:55.007	0.002725841	0.003714883	0.014302333	0.023777594	0.052711002	0.052709672	0.075258474	0.095832318	0.12630224	0.148336519	0.183892114	0.181411704	0.186483131	0.186597574	0.178355105	0.127266545	0.061120614	0.097898319
17:18:55.072	0.002844658	0.003836323	0.014306812	0.02395721	0.053196223	0.053346934	0.076243229	0.09735895	0.128472456	0.151290533	0.188237794	0.186309294	0.191679554	0.1918465	0.184336529	0.132330622	0.063729489	0.101989758
17:18:55.138	0.0029418	0.003435557	0.014438313	0.024102742	0.053805833	0.053943092	0.077262066	0.098867156	0.130611237	0.154180491	0.192525618	0.191132778	0.196816197	0.196997011	0.190238936	0.137339905	0.066293763	0.106025856
17:18:55.204	0.00295047	0.003301609	0.014561774	0.024270222	0.054346036	0.054345127	0.078264881	0.10031651	0.132732694	0.157081402	0.196801479	0.195917967	0.201898035	0.202129133	0.196071109	0.142284972	0.068838044	0.109991597
17:18:55.269	0.002875969	0.003140226	0.014683612	0.024472681	0.054795042	0.054876842	0.079329696	0.101789309	0.134817451	0.159905343	0.201019809	0.200622709	0.206870089	0.207171568	0.201836524	0.147148575	0.071345241	0.113899381
17:18:55.335	0.002755225	0.003399648	0.014808404	0.024669537	0.055376874	0.0554608	0.080375353	0.103269946	0.136897011	0.162711693	0.205171813	0.20527932	0.211760138	0.21217097	0.207553441	0.151920264	0.07380258	0.117748056
17:18:55.401	0.00277385	0.003642529	0.014914262	0.024785443	0.055865823	0.05584878	0.081428874	0.104682862	0.138903525	0.165515114	0.209264996	0.209873084	0.216602002	0.217129069	0.213206572	0.156640382	0.076250927	0.121552699
17:18:55.467	0.002708982	0.003745006	0.015043733	0.024890196	0.056309055	0.05640728	0.082370067	0.106078758	0.140886226	0.168215532	0.213249809	0.214339077	0.221302373	0.221950514	0.218682043	0.161217321	0.078622969	0.125218982
17:18:55.532	0.002729052	0.003671981	0.015181244	0.025055357	0.056719201	0.056917397	0.083178763	0.107410066	0.142800262	0.170882865	0.217175581	0.218732139	0.225911186	0.22666745	0.224042119	0.165695837	0.080938502	0.128827723
17:18:55.598	0.002656959	0.003460569	0.015275395	0.025235419	0.057097104	0.057267984	0.084039691	0.108754437	0.144599789	0.173392442	0.220907649	0.222868739	0.230273847	0.231116548	0.229132488	0.169962257	0.083147915	0.132274901
17:18:55.663	0.002702559	0.003369791	0.015380947	0.025404952	0.057423994	0.057786705	0.084800189	0.110059963	0.146367979	0.175852536	0.224559067	0.226893303	0.234509944	0.235401289	0.234091834	0.174101624	0.085272116	0.135619512
17:18:55.729	0.002713638	0.003335497	0.015506039	0.025561993	0.057883588	0.05812085	0.085623608	0.111251568	0.148066837	0.17820892	0.228028692	0.230767736	0.238573214	0.239531258	0.238851725	0.178079947	0.087316545	0.138837528
17:18:55.794	0.002720061	0.003451289	0.015680599	0.025686466	0.058210717	0.058328497	0.086595256	0.112383495	0.149688743	0.180449812	0.231379376	0.234459184	0.242481489	0.243473625	0.243393942	0.181849818	0.089243229	0.141894486
17:18:55.860	0.002793921	0.003587254	0.015804879	0.025851181	0.058473478	0.058822289	0.087283756	0.113520168	0.151242044	0.182582498	0.234493667	0.237946752	0.246169701	0.247192671	0.247655136	0.185400051	0.091065293	0.144763701
17:18:55.925	0.002784287	0.003384315	0.015953691	0.025922743	0.058846567	0.058821759	0.087964994	0.114572275	0.152718676	0.18456673	0.237472326	0.241259228	0.249682552	0.250778765	0.251743988	0.188790095	0.092799643	0.147514128
17:18:55.991	0.002849351	0.003354057	0.016014965	0.026002423	0.059066618	0.058913251	0.088600453	0.11551486	0.154091358	0.186463223	0.240306889	0.244383271	0.252984996	0.254145681	0.255593045	0.191984631	0.094446098	0.150091294
17:18:56.057	0.002857219	0.003216478	0.016069425	0.02608933	0.059366558	0.059141318	0.089189125	0.116412276	0.155369508	0.188205967	0.242908308	0.24726991	0.256065839	0.257273878	0.259159717	0.194942765	0.095938273	0.152472925
17:18:56.122	0.002792993	0.003411348	0.016399112	0.026152681	0.05958903	0.060487977	0.090136771	0.117230833	0.156580093	0.18984891	0.245292552	0.250009235	0.258871951	0.260148421	0.262446312	0.197659146	0.097297103	0.154665587
17:18:56.187	0.002746912	0.003302818	0.016384764	0.026227544	0.059849747	0.060387203	0.090494621	0.118006559	0.157661407	0.191331275	0.247544904	0.252483483	0.261540983	0.262801059	0.265534074	0.200227879	0.09859825	0.156756518
17:18:56.252	0.002744503	0.003337112	0.016406852	0.026354515	0.060124181	0.060474452	0.090771919	0.118673175	0.158628755	0.192668767	0.24950257	0.254665392	0.263852273	0.26514732	0.268220533	0.202437875	0.099741602	0.158561922
17:18:56.317	0.002884354	0.003130946	0.016448075	0.026383762	0.060242931	0.060457744	0.091021588	0.11920002	0.159394194	0.193761152	0.251161903	0.256512266	0.265838488	0.267147949	0.270466052	0.204345289	0.100704914	0.160102445
17:18:56.381	0.002766501	0.003094232	0.016448075	0.026429268	0.060371786	0.060665922	0.091294247	0.11962016	0.160077451	0.194664141	0.252538007	0.258026771	0.267463292	0.268795286	0.2723413	0.205913873	0.10150305	0.16137732
17:18:56.447	0.002854811	0.003333482	0.016409095	0.026500741	0.060507259	0.06075158	0.091544319	0.120024184	0.160610801	0.19545484	0.253715672	0.259315393	0.268861596	0.270172964	0.273955006	0.20727345	0.102205603	0.162477384
17:18:56.513	0.002922248	0.003445239	0.016438511	0.026541072	0.060674734	0.060911875	0.091792574	0.120412906	0.161066366	0.196099799	0.254694587	0.260406068	0.270045129	0.271337931	0.275335981	0.208442523	0.102801307	0.163419108
17:18:56.578	0.002962229	0.003360513	0.016196773	0.026561774	0.060775194	0.060112313	0.091606632	0.120648174	0.161349047	0.196614938	0.2554274	0.261201176	0.270990547	0.272325675	0.276410972	0.209353753	0.103271261	0.16416984
17:18:56.644	0.002958054	0.003225356	0.016291151	0.026584349	0.06092414	0.060222369	0.091853678	0.120792416	0.161596098	0.196968015	0.255959762	0.261848767	0.271663307	0.273010647	0.277196551	0.210025772	0.10362973	0.164721395
17:18:56.709	0.003029184	0.003191465	0.016276084	0.026592022	0.060784577	0.060295562	0.091805476	0.120846661	0.161751579	0.197203699	0.256329932	0.262294059	0.272162312	0.273482317	0.277766956	0.210518509	0.103867184	0.165126744
17:18:56.775	0.003023724	0.002803968	0.016211348	0.026607013	0.060832824	0.060480668	0.091875858	0.120881794	0.16179347	0.19726386	0.256460158	0.262499611	0.272365993	0.273715754	0.278050312	0.210792548	0.10402352	0.165338282
17:18:56.841	0.003016981	0.002738608	0.016154346	0.026613438	0.060860015	0.060359474	0.091924459	0.120811529	0.161735539	0.197241857	0.256441821	0.262503312	0.272395898	0.273775437	0.278137211	0.210903473	0.104069699	0.165427142
17:18:56.906	0.003038496	0.002760798	0.016091341	0.026590059	0.060822237	0.060534768	0.091861337	0.120682413	0.161577477	0.197078404	0.256277075	0.262336735	0.272239329	0.273587192	0.277994179	0.210823193	0.104024874	0.165352919
17:18:56.971	0.003078762	0.002542932	0.01610915	0.026590386	0.060868799	0.060830195	0.091791695	0.12053776	0.161379816	0.196804517	0.255942306	0.262018796	0.271921022	0.273259146	0.27766965	0.210587998	0.103905252	0.165178533
17:18:57.036	0.003096746	0.002408177	0.016122481	0.026540598	0.060777601	0.060641376	0.091863289	0.120319114	0.161108731	0.196479382	0.255513821	0.261578019	0.271440026	0.272789537	0.277179791	0.210218039	0.103743343	0.164893919
17:18:57.101	0.003050504	0.002527197	0.01576745	0.026546131	0.060693624	0.059454571	0.091323017	0.120143936	0.160774932	0.196109124	0.255055362	0.261017238	0.270946445	0.27228704	0.276646427	0.209818401	0.103577611	0.164569967
17:18:57.166	0.00307234	0.002779357	0.015801239	0.026528821	0.060540345	0.059721622	0.091400459	0.119858409	0.160409537	0.19568015	0.254445649	0.260368764	0.27025696	0.271605222	0.275918953	0.209247845	0.103290216	0.164100252
17:18:57.232	0.003175101	0.002824141	0.015796454	0.026455119	0.0604157	0.059811523	0.091433732	0.119631803	0.160060431	0.195296338	0.253891457	0.259805251	0.269661672	0.271016013	0.27527686	0.208772946	0.103040216	0.163728794
17:18:57.297	0.003114408	0.002712787	0.015765201	0.026427101	0.060326669	0.059910706	0.091492216	0.119453666	0.159777724	0.19496693	0.253389069	0.259241039	0.26908981	0.270455331	0.274703888	0.208308239	0.102823707	0.163353875
17:18:57.363	0.003203681	0.002790654	0.015806729	0.026422372	0.060257009	0.059950219	0.091424454	0.119305438	0.159456207	0.194573466	0.252871063	0.25871022	0.268541526	0.269899827	0.274126895	0.207858525	0.102606678	0.163010615
17:18:57.428	0.003219417	0.002647024	0.015856497	0.026368477	0.060156546	0.059892672	0.091258077	0.119068106	0.159146596	0.194174892	0.252284659	0.258117529	0.267917564	0.269280301	0.273476633	0.207352771	0.102348688	0.16261066
17:18:57.494	0.003191158	0.002883449	0.015834209	0.026275858	0.060022398	0.059617135	0.09124376	0.118815305	0.158794192	0.193707487	0.251676025	0.257468741	0.267254163	0.268591987	0.272749597	0.206786867	0.102060326	0.162160677
17:18:57.559	0.003161614	0.0026676	0.01640248	0.026154062	0.059977762	0.061947398	0.092088557	0.118567249	0.158629354	0.193298432	0.251168343	0.257052627	0.266695059	0.267969073	0.272176829	0.206329739	0.101837416	0.16178649
17:18:57.625	0.003178848	0.002731749	0.016235327	0.026035656	0.059853774	0.061424964	0.091891325	0.1183832	0.15831836	0.192918134	0.25066359	0.256515948	0.26616099	0.267432827	0.271605845	0.205895345	0.101620779	0.161435957
17:18:57.690	0.003197313	0.002528408	0.016117156	0.02595196	0.059828509	0.061239858	0.091758425	0.1181689	0.158037289	0.192513528	0.250135017	0.255943636	0.265561926	0.266853772	0.270971592	0.205410382	0.101385491	0.161040556
17:18:57.755	0.003177724	0.002611296	0.016121329	0.025900207	0.059693036	0.061027437	0.091421031	0.11795577	0.157751465	0.192153294	0.249638008	0.25538687	0.265014821	0.266283041	0.270369153	0.204957857	0.101161772	0.160678259
17:18:57.820	0.003112856	0.002434582	0.016092625	0.025774217	0.059622655	0.060800696	0.091267156	0.117765397	0.157467405	0.191775475	0.249162665	0.254861812	0.264470774	0.265701566	0.269809186	0.204520296	0.100968273	0.160342534
17:18:57.885	0.003144326	0.002501153	0.016101483	0.025721485	0.05947022	0.060664386	0.091103805	0.117583686	0.15719503	0.191415249	0.248664445	0.254342432	0.26393147	0.265192392	0.269232787	0.204072239	0.100754963	0.160008291
17:18:57.951	0.003100171	0.002483401	0.015966722	0.025693496	0.059278802	0.060324672	0.090886471	0.117366432	0.156897553	0.191051075	0.248169074	0.253818046	0.2633988	0.264650256	0.268664479	0.203634665	0.100535318	0.159657703
17:18:58.016	0.003017159	0.002572565	0.015917559	0.025676989	0.059203006	0.060209843	0.090707389	0.117172911	0.156609432	0.19070463	0.247684698	0.253298493	0.262857578	0.264118671	0.268116139	0.203215295	0.100317706	0.159339
17:18:58.081	0.003111249	0.002338157	0.015945352	0.025695904	0.059063683	0.060050519	0.090573075	0.116954485	0.156347988	0.190369418	0.247186019	0.252780326	0.262339408	0.263570083	0.267559943	0.202768948	0.100096397	0.159000881
17:18:58.147	0.003117351	0.002485014	0.015901793	0.025675649	0.058938679	0.059884242	0.090263512	0.116832659	0.156087643	0.190018843	0.246707774	0.252294395	0.261802471	0.263043255	0.267010946	0.202338263	0.09990385	0.158672249
17:18:58.212	0.003021012	0.002597578	0.015843473	0.025649239	0.058860957	0.059750584	0.090028368	0.116667311	0.155802541	0.189605461	0.246170946	0.251748077	0.261233247	0.262478475	0.266406911	0.201866994	0.099684435	0.158294448
17:18:58.277	0.003023742	0.00264922	0.015797672	0.02560757	0.058781188	0.059680573	0.089762367	0.116461674	0.155510163	0.189215336	0.245674981	0.251253458	0.260715181	0.261969279	0.265843939	0.201442241	0.099477803	0.157971191
17:18:58.343	0.002999657	0.002457579	0.01575044	0.025582407	0.058684578	0.0595615	0.089614139	0.116232319	0.155213723	0.18885733	0.245168638	0.25070714	0.260151544	0.261390643	0.265242768	0.200985133	0.099247716	0.157594791
17:18:58.408	0.002933825	0.002538674	0.015653646	0.025535207	0.058544053	0.059521191	0.089482247	0.116042221	0.15490276	0.188438517	0.244661326	0.250154796	0.259568	0.260788126	0.264619047	0.200508459	0.099033702	0.157223088
17:18:58.474	0.00288983	0.002517694	0.01562616	0.025516559	0.058486543	0.059353587	0.089188012	0.115785571	0.154596235	0.188087935	0.244121806	0.249588189	0.258982034	0.260181264	0.264010271	0.200034927	0.098818875	0.156857584
17:18:58.540	0.002895128	0.002856598	0.015259017	0.025548076	0.058354802	0.057786555	0.088420859	0.115551815	0.154213392	0.187695993	0.243565135	0.248960996	0.258359122	0.259594483	0.263365439	0.199544526	0.098581697	0.156467133
17:18:58.605	0.002850277	0.002987317	0.015235704	0.025566011	0.058227097	0.057888655	0.088296428	0.115326356	0.153917458	0.18728207	0.243032447	0.24838983	0.257764381	0.258975848	0.262740262	0.19905354	0.098354114	0.156095937
17:18:58.670	0.002782198	0.002944147	0.015277538	0.025547987	0.058130487	0.057739615	0.088174217	0.11514492	0.15358996	0.186868543	0.242502446	0.247821958	0.257190051	0.258384264	0.262124788	0.198572881	0.098115969	0.155732258
17:18:58.737	0.002798094	0.002936078	0.015196418	0.025436899	0.058029543	0.057573604	0.088127945	0.11495757	0.153278775	0.186501821	0.241984761	0.247281053	0.256624728	0.257783853	0.261545025	0.198126945	0.097884191	0.155394654
17:18:58.801	0.002785891	0.003240283	0.015185224	0.0254866	0.057861106	0.057479989	0.087952293	0.114696315	0.152982242	0.186113226	0.241458311	0.246754116	0.256045044	0.25724637	0.260942148	0.197661402	0.097636651	0.155014006
17:18:58.867	0.002738686	0.003121667	0.0151098	0.025471966	0.057771352	0.057407857	0.087690524	0.114466409	0.152674964	0.185705137	0.240910537	0.246148115	0.25541026	0.256593319	0.26028763	0.197148542	0.097369445	0.154600481
17:18:58.932	0.002752173	0.003304836	0.015103391	0.025456084	0.057687372	0.057464874	0.087546331	0.114282291	0.152354805	0.185315758	0.240345505	0.245543442	0.254790878	0.255928092	0.25961596	0.196622986	0.09712199	0.154184009
17:18:58.998	0.002806284	0.003465008	0.015075605	0.025406563	0.057680755	0.057454266	0.087314006	0.114049704	0.152039935	0.18491338	0.239772814	0.244960726	0.254169949	0.255282496	0.25895005	0.196106123	0.096853241	0.153764484
17:18:59.063	0.00279938	0.003469042	0.015021451	0.025321441	0.057599423	0.057355084	0.087107496	0.113778685	0.151688465	0.184490536	0.239194396	0.244343611	0.253498916	0.254643667	0.258246033	0.195567478	0.096571118	0.153328208
17:18:59.128	0.002729373	0.003293136	0.014960682	0.025215527	0.057487171	0.05728136	0.087079262	0.113491784	0.151334285	0.184049256	0.238581159	0.243687602	0.2528418	0.253987417	0.257529811	0.195006243	0.096284883	0.152881912
17:18:59.194	0.00271717	0.002973599	0.014894623	0.025125049	0.057340873	0.057105536	0.08692579	0.113197802	0.151004923	0.183623248	0.237993007	0.243051746	0.252179074	0.253295303	0.256829676	0.194450721	0.096002958	0.152438905
17:18:59.260	0.002701613	0.002884839	0.014879662	0.025046885	0.057231268	0.057008475	0.086726338	0.112987353	0.150652065	0.183181603	0.237402062	0.24241338	0.251472487	0.252563033	0.256088619	0.193856789	0.09571944	0.151975714
17:18:59.325	0.00269198	0.00291196	0.014866531	0.024982017	0.057102052	0.056820983	0.086530517	0.112747272	0.150340725	0.182759824	0.236836145	0.241825566	0.250843839	0.25192634	0.255417121	0.193341727	0.095458614	0.151566218
17:18:59.391	0.002679135	0.002797782	0.014871921	0.024948377	0.057015788	0.056695547	0.086440978	0.112512828	0.150069202	0.182388782	0.236328652	0.241277736	0.250290007	0.251365216	0.254824416	0.192871171	0.095223478	0.151207209
17:18:59.456	0.002736296	0.002669483	0.014826426	0.024889933	0.056843018	0.056895238	0.086285491	0.112343906	0.149785365	0.18197076	0.235815376	0.240756649	0.249708405	0.250852071	0.25419924	0.192385528	0.094968899	0.150809558
17:18:59.521	0.002706752	0.002549253	0.014698586	0.024819244	0.056685409	0.056810641	0.086143111	0.112105131	0.149476605	0.181592242	0.235293229	0.240186048	0.249126046	0.250206836	0.253548133	0.191887444	0.094716669	0.150410714
17:18:59.586	0.002656977	0.00250689	0.014416237	0.0247724	0.05659337	0.055517553	0.085509261	0.111888517	0.14909691	0.181227156	0.234780381	0.239586366	0.248558868	0.249618069	0.25293305	0.191422478	0.094477539	0.15003791
17:18:59.652	0.002587614	0.00253715	0.014437002	0.024697806	0.056459702	0.0558212	0.085579442	0.11165985	0.148807556	0.180885312	0.234251217	0.239072184	0.248001602	0.249043727	0.252321347	0.190941964	0.09424572	0.149647965
17:18:59.717	0.002611377	0.002349543	0.014493185	0.024718953	0.056368387	0.055893598	0.085390566	0.111450296	0.148487304	0.180463297	0.233692101	0.238506235	0.247373186	0.248462251	0.251643183	0.19040611	0.093984926	0.149212945
17:18:59.784	0.002698724	0.002363261	0.014455317	0.02458288	0.056283686	0.056101511	0.085180828	0.111271816	0.148161189	0.18004602	0.233136024	0.237895945	0.246742849	0.247806278	0.250967445	0.189888698	0.093742452	0.148810596
17:18:59.849	0.002663882	0.002221244	0.014426207	0.024547278	0.056229667	0.055903941	0.085125371	0.111034141	0.147883962	0.17969308	0.232649524	0.237407781	0.246219721	0.247274977	0.25040513	0.189457726	0.093546768	0.148470823
17:18:59.914	0.002705628	0.002132484	0.014484933	0.024444933	0.056159043	0.055872118	0.085111457	0.110784916	0.147578135	0.179314417	0.232176331	0.23690319	0.245662431	0.246748697	0.249821533	0.189011647	0.093304637	0.148116848
17:18:59.979	0.002625667	0.001922284	0.014518728	0.02437239	0.055898807	0.055869465	0.08498501	0.110576873	0.147290731	0.178950152	0.231712115	0.236387559	0.245136456	0.246222941	0.249263866	0.188582166	0.093111207	0.147786408
17:19:00.045	0.002623419	0.001927932	0.014502343	0.02436641	0.055804363	0.055834725	0.084946091	0.110414963	0.147028626	0.178626965	0.231315948	0.235964602	0.244694346	0.245752095	0.248813395	0.188246344	0.092961128	0.147519467
17:19:00.111	0.00260672	0.001968277	0.014484939	0.024333307	0.055775061	0.055675343	0.084721229	0.110264259	0.146799499	0.178324435	0.230924406	0.235554581	0.244246182	0.245282898	0.248347071	0.187893323	0.092800307	0.147248641
17:19:00.176	0.002613625	0.002160726	0.014530774	0.024283438	0.055750155	0.055575099	0.084596193	0.110096642	0.146532956	0.177995216	0.230520522	0.235088008	0.243764641	0.24479024	0.247842172	0.18751362	0.092610872	0.146951966
17:19:00.242	0.00253204	0.002109084	0.014521004	0.02431565	0.055641512	0.055494126	0.084488703	0.109881245	0.146297657	0.177651464	0.230056496	0.234615952	0.243291385	0.244305038	0.247325615	0.187126432	0.092427454	0.146648361
17:19:00.308	0.002463479	0.002234872	0.014490064	0.024288078	0.055527093	0.055462833	0.084446756	0.10971191	0.146020714	0.177309339	0.229572199	0.234093215	0.242748519	0.243751834	0.246748372	0.186671506	0.092204353	0.146311443
17:19:00.373	0.002445496	0.002513256	0.014485791	0.024215626	0.055499662	0.055189683	0.084225725	0.109525593	0.145700746	0.176947112	0.229056447	0.233540579	0.242164512	0.243184401	0.24613321	0.186192092	0.091953435	0.145924399
17:19:00.439	0.002408084	0.002703284	0.014461054	0.02412497	0.055344099	0.054949947	0.084091612	0.109338244	0.145422601	0.176556942	0.228577982	0.233016039	0.241608635	0.242577501	0.245560192	0.185748093	0.091730696	0.145596598
17:19:00.504	0.002361842	0.002930027	0.014535459	0.024086157	0.055216686	0.054993704	0.083949299	0.109149933	0.145151331	0.176180834	0.228072123	0.232472294	0.241024773	0.242047751	0.244962151	0.185276116	0.091498991	0.145236587
17:19:00.570	0.002308213	0.00289775	0.014808144	0.024021822	0.055102268	0.056189731	0.084223167	0.108949246	0.144924753	0.175766372	0.227537876	0.231964472	0.240436019	0.241462843	0.244342608	0.184785554	0.09124148	0.144839388
17:19:00.635	0.002392028	0.003022507	0.014753279	0.023950617	0.055068941	0.055780006	0.083824868	0.108773792	0.144663907	0.175403544	0.227086192	0.231425963	0.239897348	0.240901854	0.243795175	0.184357483	0.091021794	0.144503979
17:19:00.700	0.002344662	0.003373513	0.014649663	0.023884143	0.054963306	0.055632027	0.083604242	0.108533436	0.144392384	0.175044337	0.226597591	0.230904942	0.239360514	0.240335972	0.243223393	0.183905092	0.090812319	0.144160077
17:19:00.765	0.002245753	0.003345271	0.014616893	0.023839976	0.054895209	0.055168732	0.08345198	0.1083377	0.144112149	0.174706851	0.226107004	0.230397526	0.238839836	0.239801374	0.242650547	0.183451219	0.090563476	0.143803337
17:19:00.830	0.00222472	0.00335092	0.014586764	0.023717465	0.054745299	0.055114102	0.083292862	0.108113433	0.143776961	0.174323549	0.225588218	0.229790908	0.238227702	0.239169769	0.242007624	0.182951036	0.090328373	0.143415606
17:19:00.895	0.002164241	0.003328326	0.014494649	0.023662144	0.054637019	0.054817085	0.082862902	0.107919072	0.143503704	0.173959002	0.225099811	0.229284982	0.237698314	0.238631102	0.241451115	0.182520082	0.090114847	0.143074957
17:19:00.961	0.00209584	0.003282332	0.014399679	0.023606555	0.054538002	0.054517415	0.082774773	0.10771708	0.143229533	0.173596311	0.224607154	0.228750152	0.237144379	0.238057524	0.240848286	0.18204615	0.089874381	0.142689576
17:19:01.026	0.002090381	0.003601869	0.014439371	0.023484135	0.054425029	0.054382962	0.082537003	0.107512544	0.142938382	0.173201129	0.224048897	0.228149046	0.236511343	0.237442891	0.240161781	0.18150668	0.089610484	0.142248529
17:19:01.092	0.002137908	0.003513109	0.01440853	0.023437202	0.054236083	0.054429105	0.0823916	0.107261669	0.142648873	0.172846888	0.223544329	0.227605165	0.23592877	0.236904861	0.239548059	0.181043043	0.089381152	0.141871604
17:19:01.157	0.00212731	0.00345138	0.014346916	0.023370717	0.054067045	0.054288817	0.082247608	0.107032382	0.1423621	0.172490746	0.223004303	0.227049006	0.235343433	0.23633153	0.238928861	0.180560439	0.08914977	0.141477974
17:19:01.222	0.00224388	0.003599852	0.014309254	0.023316644	0.05391064	0.054109369	0.0821016	0.106819113	0.142047545	0.172104987	0.222466748	0.226453631	0.234711666	0.235731764	0.238281013	0.180050721	0.088889146	0.141069191
17:19:01.287	0.002420983	0.003588555	0.014249197	0.023213764	0.053853973	0.053999578	0.081742022	0.106571813	0.141724547	0.171720247	0.22193987	0.225892395	0.234123506	0.235133091	0.237641751	0.17956262	0.088634904	0.140656135
17:19:01.352	0.002461766	0.003346482	0.014195862	0.023191546	0.053606972	0.054013103	0.081562335	0.106341976	0.14143015	0.17134646	0.22142307	0.225391298	0.233595907	0.234578689	0.237061084	0.179110003	0.088403034	0.140302413
17:19:01.418	0.002421625	0.003152823	0.014155458	0.023199487	0.053517941	0.053900926	0.08133949	0.106062158	0.141093992	0.170963112	0.220851189	0.224785922	0.232997583	0.233979192	0.236392079	0.1785943	0.088154174	0.139880213
17:19:01.482	0.002537873	0.002727984	0.014166346	0.023192705	0.053453575	0.053707068	0.081221244	0.105878935	0.140810367	0.170591181	0.220358589	0.224275911	0.232489198	0.233459183	0.23583864	0.178144926	0.08792383	0.139537721
17:19:01.548	0.002632124	0.002593633	0.014130109	0.023102229	0.053422294	0.053466537	0.081132309	0.105640642	0.140519376	0.17022004	0.219866227	0.223766669	0.231922254	0.232954633	0.235251383	0.177698887	0.087715911	0.139178171
17:19:01.613	0.002535143	0.002501556	0.014024556	0.023032364	0.053274791	0.053332349	0.081058699	0.105361305	0.140186268	0.169804056	0.219304798	0.223196564	0.231286089	0.232403258	0.234599786	0.177189893	0.087460065	0.138778957
17:19:01.679	0.0026082	0.002236082	0.014019266	0.022995423	0.05321295	0.053224149	0.080899581	0.105180283	0.139901291	0.169454561	0.218837063	0.222685854	0.230763403	0.231903054	0.234042184	0.176768918	0.087243663	0.138429697
17:19:01.745	0.002666967	0.002069051	0.013979567	0.022981681	0.053169156	0.053078557	0.080842511	0.10495499	0.139607668	0.16909025	0.218381317	0.222197102	0.230226715	0.231403622	0.233486393	0.176328112	0.087050992	0.138077836
17:19:01.811	0.00275046	0.002029109	0.01397224	0.022997505	0.053112971	0.053003006	0.08068642	0.104781736	0.139318722	0.168715444	0.217867663	0.221693098	0.229710037	0.23089002	0.232911606	0.175875647	0.086810526	0.137699887
17:19:01.876	0.0027655	0.002109307	0.013941399	0.022950571	0.053008659	0.05294758	0.08073502	0.10456063	0.139052705	0.168336789	0.217377481	0.221169323	0.229139252	0.230369742	0.232298371	0.175394596	0.086589339	0.137327721
17:19:01.942	0.002867779	0.00210729	0.014241903	0.022900603	0.052940562	0.054341442	0.080796732	0.104335055	0.13882525	0.167957297	0.216814414	0.220664007	0.228546808	0.229757529	0.231688268	0.174893197	0.086340589	0.136933956
17:19:02.007	0.002897965	0.001791788	0.014065307	0.022879456	0.05291686	0.054021883	0.080572073	0.104111886	0.138503986	0.16756016	0.216290676	0.220119971	0.2279585	0.229145383	0.23104704	0.174396259	0.086081743	0.136562637
17:19:02.073	0.002923816	0.001636457	0.01401502	0.02277952	0.052908439	0.053657241	0.080396215	0.103883219	0.138165526	0.167125984	0.215711853	0.219502527	0.227341558	0.228513328	0.230376386	0.173852251	0.085807285	0.136142522
17:19:02.140	0.002955768	0.001463375	0.013984386	0.022797812	0.052862721	0.053564157	0.080094919	0.103712578	0.137872833	0.166752151	0.215212607	0.21898205	0.226797911	0.227971776	0.229785183	0.173388902	0.085589021	0.135780995
17:19:02.204	0.00283695	0.001397611	0.013915883	0.022683244	0.052868735	0.05324115	0.079999125	0.103480404	0.137563511	0.166385094	0.214709871	0.218453944	0.226242877	0.227392084	0.229175817	0.172919232	0.085343779	0.135395623
17:19:02.269	0.002788781	0.001348389	0.013860512	0.02269761	0.052727369	0.053056044	0.079863156	0.103291337	0.137258442	0.165987166	0.214172233	0.217873033	0.225632592	0.226783213	0.228524613	0.172399029	0.085111446	0.134986069
17:19:02.335	0.002830207	0.001359686	0.013828247	0.02269422	0.052710044	0.05295527	0.079839557	0.103059849	0.136956743	0.165648061	0.213686381	0.217344968	0.225077306	0.226235719	0.227933686	0.17193808	0.084885517	0.13460537
17:19:02.400	0.002783483	0.001295939	0.013776436	0.02264675	0.052655061	0.052687689	0.079733682	0.102899244	0.136716593	0.165336852	0.213225526	0.21688034	0.224580052	0.225727415	0.227401245	0.17150307	0.084662512	0.134262742
17:19:02.466	0.002732423	0.001436342	0.013711701	0.022554667	0.052529214	0.052671512	0.079468286	0.102619976	0.136379077	0.164932711	0.212669149	0.216284673	0.223928609	0.225063941	0.226700135	0.170960926	0.084388363	0.133822775
17:19:02.531	0.002717348	0.001451673	0.013624264	0.022531735	0.05237738	0.052526981	0.079203091	0.102387114	0.136084681	0.164576105	0.212136166	0.215725156	0.223342512	0.224429503	0.226065627	0.170435968	0.084117206	0.13341759
17:19:02.597	0.00276905	0.001308043	0.013632716	0.022548242	0.052315646	0.052403666	0.079011707	0.102214272	0.135798067	0.164221681	0.211651653	0.21521824	0.222815134	0.223892755	0.225477318	0.169974564	0.083894963	0.133037224
17:19:02.662	0.002701774	0.001381472	0.013646453	0.022489441	0.052206883	0.05229971	0.078833834	0.101991171	0.135501121	0.163852016	0.211109557	0.214666055	0.222223665	0.223311856	0.224840585	0.169469356	0.08362714	0.132636653
17:19:02.728	0.002670303	0.001514208	0.013597903	0.022460531	0.052043017	0.052431511	0.078480104	0.10180746	0.135220019	0.163497585	0.210601792	0.214116784	0.221661631	0.222706732	0.224226209	0.168994825	0.083374802	0.132255916
17:19:02.793	0.002600458	0.001546888	0.013542225	0.022421509	0.051948691	0.052417426	0.078283071	0.101636062	0.134955143	0.163134711	0.21012774	0.213626878	0.22110394	0.222166237	0.223656136	0.168547716	0.083146979	0.131903226
17:19:02.859	0.002634497	0.001504212	0.013524715	0.022442835	0.051800106	0.052409471	0.077975322	0.101423275	0.134667585	0.162787711	0.209614407	0.21310159	0.220565966	0.221611197	0.22306693	0.168079868	0.082894638	0.13151312
17:19:02.924	0.002626469	0.001494125	0.013194489	0.022429005	0.051833433	0.050898393	0.077465097	0.101225614	0.134315139	0.162438064	0.209167532	0.212557528	0.220075525	0.221120412	0.222512693	0.167656247	0.082674899	0.131183458
17:19:02.990	0.002617156	0.001715622	0.013269606	0.022350841	0.051668124	0.050986438	0.077363051	0.101025066	0.13402884	0.162111074	0.208708267	0.212053521	0.219582911	0.220595855	0.221992708	0.167245085	0.082469099	0.130847117
17:19:03.055	0.002613303	0.001894757	0.013266046	0.022382963	0.051557555	0.050974239	0.077315052	0.100822523	0.133750195	0.16176199	0.208208514	0.211543872	0.219031377	0.220017714	0.221409605	0.166788151	0.082230089	0.130473435
17:19:03.120	0.002608165	0.00196173	0.013256782	0.022300964	0.051418954	0.050809022	0.077219866	0.100588699	0.13342024	0.161388811	0.207707311	0.210992612	0.218459224	0.219429787	0.220787715	0.166288729	0.08195401	0.13008334
17:19:03.187	0.002678974	0.001937836	0.013228583	0.022295342	0.051231388	0.050872934	0.076925227	0.100414689	0.133158919	0.161061775	0.207230189	0.210498806	0.217938459	0.218919332	0.220226427	0.165839405	0.081727156	0.129735642
17:19:03.252	0.00259227	0.001955589	0.013209656	0.022210933	0.051102172	0.050968404	0.076854888	0.100197571	0.13288144	0.160706469	0.206773964	0.21004934	0.217456158	0.218466463	0.219726309	0.16543468	0.081514343	0.129420413
17:19:03.317	0.002472971	0.002212591	0.013188279	0.02209681	0.050992327	0.050878238	0.076443686	0.09998671	0.132612466	0.160334728	0.206309774	0.209550572	0.216936951	0.2179433	0.219175435	0.165001432	0.081291663	0.129077855
17:19:03.382	0.002458038	0.0021436	0.013193064	0.022073522	0.050856734	0.050832448	0.076344264	0.099747592	0.132305472	0.159968698	0.205853654	0.20902409	0.21638816	0.217417664	0.218615457	0.164554951	0.081065281	0.128727433
17:19:03.448	0.002445514	0.002016108	0.01317403	0.022024595	0.050792487	0.050504138	0.076149047	0.09962377	0.132036282	0.159653223	0.205413585	0.20856605	0.215911628	0.216917595	0.218117935	0.164153551	0.080875604	0.128400777
17:19:03.514	0.002458823	0.002050402	0.013207826	0.021983104	0.050661104	0.050415032	0.076001021	0.099481522	0.131755592	0.159343871	0.204995156	0.208109271	0.215458552	0.216445603	0.217620221	0.163765777	0.080686709	0.128089364
17:19:03.579	0.002523049	0.002058067	0.013147769	0.021865592	0.050520473	0.050157263	0.075858239	0.099289429	0.131463627	0.158996498	0.204514921	0.207594161	0.214942807	0.215835818	0.217049221	0.163307288	0.080441371	0.127723588
17:19:03.645	0.002585188	0.002087923	0.013076112	0.021816428	0.050376098	0.050135251	0.07577394	0.099104488	0.131160318	0.158670481	0.204104288	0.207136731	0.214479145	0.215333478	0.216539084	0.162904397	0.080238477	0.127405789
17:19:03.711	0.002522728	0.002148039	0.01309677	0.021745313	0.050289233	0.049969505	0.075844725	0.09890552	0.130890874	0.158332669	0.203641605	0.206654409	0.21395336	0.214841052	0.215998886	0.162464341	0.0800131	0.127040984
17:19:03.775	0.002539909	0.002232765	0.013097595	0.021697755	0.05012296	0.049779892	0.075753976	0.098676577	0.130597964	0.158022807	0.203205298	0.206182334	0.213480864	0.214371211	0.215479042	0.162044809	0.079797603	0.12670914
17:19:03.841	0.002425908	0.002403426	0.013053118	0.021552938	0.050107319	0.049533526	0.075654755	0.098506073	0.130304486	0.157686766	0.202762564	0.205685323	0.212956219	0.213829067	0.214943572	0.161624464	0.079590654	0.126376115
17:19:03.906	0.00246348	0.002498238	0.012996222	0.021433461	0.049915539	0.049403581	0.07549261	0.098349114	0.130007411	0.157337583	0.202313703	0.205220243	0.212442219	0.213309936	0.214391135	0.161197868	0.079361819	0.126024066
17:19:03.971	0.002475844	0.002355012	0.012943599	0.02137002	0.049782833	0.049295116	0.075313125	0.098162728	0.129749435	0.156984962	0.201841316	0.204755634	0.211937858	0.212829461	0.21385174	0.160769297	0.079141976	0.125682515
17:19:04.036	0.002469742	0.002237606	0.012937903	0.021272762	0.04964291	0.049235181	0.075093957	0.097969673	0.12948972	0.156670133	0.201429455	0.204329634	0.211471222	0.212366851	0.213340856	0.160360175	0.078932754	0.125363398
17:19:04.101	0.002520641	0.002396971	0.01287744	0.021213158	0.0495386	0.049268331	0.075027405	0.097790643	0.129246132	0.156319285	0.200993896	0.203878785	0.210979934	0.211862301	0.212827125	0.159961083	0.078729501	0.125035971
17:19:04.165	0.002485138	0.002491873	0.012836324	0.021146237	0.049409624	0.04918559	0.074919511	0.097571599	0.128951106	0.155956267	0.200528984	0.203400932	0.210466863	0.211347141	0.212293395	0.159537298	0.078526331	0.124697674
17:19:04.231	0.002398915	0.002340577	0.012842733	0.021108315	0.049387004	0.048968396	0.074763621	0.097374694	0.128694637	0.155624447	0.200074961	0.202916557	0.209967626	0.210837016	0.211755777	0.159122637	0.078287887	0.124360028
17:19:04.296	0.002500553	0.001814067	0.012874897	0.021057366	0.049239379	0.04878276	0.07487353	0.097160395	0.128417379	0.155265331	0.199614058	0.202427376	0.20943849	0.210301638	0.211191414	0.158674703	0.078057843	0.124004441
17:19:04.362	0.002631734	0.001814067	0.012893825	0.020955913	0.049142288	0.048807069	0.074682748	0.096980128	0.12811599	0.154913828	0.199145221	0.201950562	0.208920589	0.209756932	0.210629879	0.158238304	0.077862396	0.123653158
17:19:04.427	0.002601066	0.002027092	0.012786649	0.020935421	0.049056745	0.048826164	0.074528269	0.096732278	0.127863521	0.154591759	0.198696624	0.201491572	0.208450017	0.209275843	0.210111018	0.157849345	0.077641346	0.123340742
17:19:04.493	0.002615034	0.002212995	0.012786955	0.020887327	0.048970842	0.048799909	0.07439335	0.096470746	0.127587868	0.154216161	0.198208535	0.200990452	0.207913374	0.208732283	0.209529484	0.157398744	0.077384591	0.122974607
17:19:04.558	0.002567829	0.002422792	0.012805384	0.020920163	0.048872065	0.048836506	0.074217093	0.096211896	0.127290226	0.153872135	0.197758705	0.200503075	0.207385457	0.208248085	0.208987406	0.156979128	0.07717489	0.122645001
17:19:04.624	0.002456076	0.002327173	0.012751642	0.020898926	0.048787004	0.048485123	0.073995661	0.09595449	0.127015993	0.153502949	0.197262955	0.199997804	0.206853851	0.207706324	0.208444773	0.156536715	0.076948678	0.122286098
17:19:04.689	0.002509061	0.002064523	0.012665537	0.020815052	0.048634447	0.048223641	0.073789555	0.095714478	0.12672525	0.15314616	0.196775218	0.19950016	0.206351494	0.207162989	0.207897652	0.156116059	0.076738638	0.121960887
17:19:04.755	0.002497019	0.002240833	0.012648832	0.020756876	0.048572967	0.048236901	0.07356812	0.095508085	0.126452715	0.152808309	0.196299739	0.19904239	0.205840596	0.206637263	0.207364858	0.155706165	0.076528998	0.121630548
17:19:04.819	0.002493487	0.002342101	0.012628474	0.02067086	0.04839635	0.048159199	0.073477976	0.095274468	0.126136679	0.152443945	0.195786838	0.19851803	0.205295429	0.206075816	0.206771537	0.155240859	0.07629448	0.12125569
17:19:04.885	0.00252544	0.002530111	0.012599264	0.020696112	0.048274835	0.048194204	0.073410214	0.095021392	0.125855959	0.152102147	0.195305796	0.198034447	0.204782677	0.205585391	0.206227589	0.154809237	0.076069304	0.120915762
17:19:04.951	0.002604277	0.002531322	0.012528013	0.0206258	0.048214918	0.047971353	0.073312001	0.09476653	0.125565346	0.151768616	0.194834136	0.197526221	0.204253033	0.205047983	0.205660218	0.154351181	0.075835531	0.120551017
17:19:05.016	0.002541657	0.002549477	0.012539919	0.020591983	0.048080409	0.047810645	0.073082052	0.094598295	0.125224109	0.151378492	0.194326361	0.19698108	0.203721658	0.204515903	0.205095533	0.153899593	0.0756128	0.120179739
17:19:05.082	0.002412564	0.002367922	0.012560071	0.020553912	0.047944402	0.047594511	0.072815043	0.094374577	0.124918633	0.150990961	0.193809293	0.196461149	0.203194671	0.203991369	0.204518058	0.153447677	0.07538105	0.119827441
17:19:05.147	0.002351246	0.002511149	0.012565462	0.020492434	0.047888818	0.047537229	0.072671857	0.094167841	0.124626569	0.150620383	0.193298972	0.19594879	0.202668506	0.20344927	0.203947019	0.152990795	0.075138586	0.119465956
17:19:05.213	0.002395722	0.002727402	0.012534722	0.020461204	0.047735301	0.047512565	0.072353016	0.093931749	0.124289745	0.150234343	0.192780261	0.195410056	0.202100644	0.202856862	0.20334999	0.152511639	0.074909811	0.119097219
17:19:05.279	0.002460429	0.003094143	0.012452476	0.020404545	0.047646993	0.047481802	0.072060393	0.093722263	0.123973018	0.149857217	0.192278755	0.194885016	0.201575177	0.202330903	0.202780632	0.152065673	0.074676595	0.118741398
17:19:05.344	0.002371637	0.003328551	0.012336542	0.020386342	0.047592732	0.047329051	0.071948065	0.093521852	0.123679034	0.149517457	0.191783327	0.194395949	0.201074717	0.201836694	0.202245822	0.151656769	0.074440054	0.118403503
17:19:05.410	0.002330372	0.003194604	0.012358424	0.020316209	0.047429468	0.047099922	0.071865986	0.093300403	0.123353048	0.149136246	0.191285806	0.193879964	0.200525079	0.201282247	0.201692407	0.151206497	0.074225912	0.118047515
17:19:05.476	0.002316404	0.003171696	0.012253378	0.020268026	0.047324194	0.046799192	0.071688517	0.093140625	0.123033012	0.14876725	0.190803262	0.193366141	0.200000666	0.200759908	0.201147032	0.150782238	0.074009147	0.117708949
17:19:05.541	0.002287502	0.003211638	0.012202865	0.020163184	0.04719606	0.046788584	0.071623577	0.092982153	0.12277787	0.148425916	0.190344856	0.192924124	0.199547189	0.200299905	0.200681308	0.150417304	0.07383023	0.117404717
17:19:05.607	0.002411297	0.003417401	0.012253352	0.020107862	0.047045067	0.046828628	0.071538673	0.092778098	0.122476073	0.148071629	0.189864246	0.192433317	0.199041394	0.199784685	0.200148322	0.150008327	0.073629085	0.117078937
17:19:05.671	0.002338401	0.003419418	0.012266376	0.020099207	0.046982265	0.046737932	0.071301309	0.092549911	0.12216864	0.147680068	0.189370945	0.191907127	0.198485496	0.199242676	0.199563691	0.149538852	0.073379376	0.116700903
17:19:05.738	0.002415632	0.003460616	0.012226984	0.020013905	0.046928847	0.046581997	0.071121216	0.092298006	0.121844795	0.14728363	0.18885815	0.191347178	0.197918906	0.198636457	0.198957235	0.149058058	0.073132759	0.116325956
17:19:05.803	0.002437558	0.003052318	0.012185049	0.020040227	0.046844027	0.046591809	0.07083993	0.09208068	0.121571223	0.14691878	0.188417759	0.190895819	0.197444533	0.19816529	0.198465721	0.148667144	0.072924961	0.116029548
17:19:05.868	0.002249858	0.002831628	0.012107076	0.01999017	0.046759446	0.046293465	0.070560619	0.091842525	0.121238208	0.14648061	0.187863699	0.190303915	0.196816224	0.197539589	0.19781678	0.148166662	0.07267551	0.115622063
17:19:05.934	0.002117232	0.002927247	0.012102397	0.020001234	0.046586558	0.046349774	0.070393435	0.091633589	0.120931875	0.146097536	0.187369593	0.18979515	0.196285862	0.1970035	0.197276822	0.147761217	0.072456508	0.115289772
17:19:06.000	0.002073076	0.002783616	0.012064329	0.019924855	0.046515695	0.046116668	0.070234519	0.09138409	0.120637896	0.145740976	0.186877825	0.189322351	0.195752466	0.196471922	0.196736021	0.147353545	0.072234804	0.114963679
17:19:06.065	0.002162511	0.002922405	0.011999188	0.019841665	0.046443441	0.046090149	0.070176233	0.091165528	0.120350998	0.145422253	0.186442566	0.188867132	0.195278747	0.195974685	0.196258641	0.146979413	0.07205546	0.114667443
17:19:06.131	0.002193179	0.002639582	0.011985751	0.019830244	0.04623951	0.045917242	0.069997957	0.090957072	0.120042652	0.145021869	0.185996286	0.188391509	0.194808824	0.19546483	0.195772853	0.146615117	0.071850627	0.114364896
17:19:06.196	0.002208272	0.002776354	0.011935571	0.019779116	0.046187173	0.045704557	0.070030226	0.090761405	0.119808865	0.144710196	0.185626411	0.187986205	0.194422096	0.195075391	0.195355055	0.146307323	0.07169399	0.114107299
17:19:06.262	0.002142601	0.002549612	0.011858317	0.019778938	0.046079252	0.045679893	0.069920115	0.090588219	0.119516358	0.144342075	0.1851572	0.187514896	0.193911786	0.194548571	0.194845853	0.145922709	0.071502394	0.113798148
17:19:06.327	0.002181939	0.002426558	0.011843868	0.019686855	0.04592465	0.045607229	0.069718042	0.090340438	0.119228959	0.143953023	0.184684708	0.187016417	0.193397074	0.19401763	0.194313746	0.145510663	0.071290953	0.113479787
17:19:06.393	0.002143243	0.00253549	0.011849565	0.019635192	0.045830447	0.045564798	0.069587763	0.090118684	0.118911065	0.143607042	0.18421592	0.186529421	0.192913591	0.193553049	0.193784686	0.145115144	0.071063567	0.113162678
17:19:06.457	0.002118356	0.002526211	0.011897403	0.019624484	0.045705683	0.045632953	0.069413521	0.089849452	0.118620736	0.143230189	0.183716836	0.186030919	0.192384158	0.193024348	0.193241489	0.144698504	0.070874456	0.112829412
17:19:06.523	0.002118356	0.002618602	0.011837779	0.019575944	0.045588259	0.045423303	0.069035189	0.089588058	0.118279504	0.142831478	0.183192266	0.185479499	0.191808187	0.192414788	0.192630877	0.144231294	0.070618865	0.112460525
17:19:06.587	0.002067457	0.002477796	0.011757976	0.019505276	0.045497182	0.045179854	0.0688557	0.089342202	0.117945958	0.142397811	0.182653231	0.184912603	0.191214627	0.191840768	0.192012444	0.14375804	0.070358072	0.112092284
17:19:06.653	0.002033257	0.002460851	0.011685607	0.01947128	0.045353889	0.045231301	0.068627611	0.089155678	0.117610171	0.142004112	0.18212205	0.184373484	0.190666006	0.191263061	0.191435055	0.143327459	0.070135967	0.111754373
17:19:06.718	0.001904163	0.002285303	0.01163685	0.019444363	0.045141658	0.044884957	0.068565902	0.088928179	0.11729845	0.141620437	0.181633749	0.183855916	0.190140497	0.190792081	0.190899518	0.142924323	0.069936136	0.111421725
17:19:06.784	0.001895564	0.002269568	0.011600819	0.019370661	0.04498513	0.044574415	0.068460989	0.088693668	0.116972495	0.141220502	0.181101273	0.183299983	0.189557544	0.190192314	0.190297496	0.142469675	0.069696392	0.111055436
17:19:06.849	0.002041035	0.002238099	0.011585652	0.019273135	0.044763516	0.044372602	0.068432755	0.088517733	0.116665155	0.140914078	0.180659975	0.182863468	0.189139494	0.189702309	0.189855851	0.142134376	0.069526794	0.110797627
17:19:06.914	0.002081979	0.001975853	0.0116	0.019223346	0.04468098	0.044247961	0.068154247	0.088271395	0.116323165	0.140476327	0.180144677	0.18233486	0.188579844	0.189160832	0.18928655	0.141698799	0.069315746	0.110456275
17:19:06.980	0.002041356	0.00205614	0.011506461	0.019154997	0.044563554	0.044290392	0.068022355	0.088059228	0.116041624	0.140109597	0.179660675	0.181813384	0.188074789	0.188648916	0.188756926	0.141294085	0.069120447	0.110147636
17:19:07.045	0.002018556	0.001881802	0.011515319	0.019158655	0.044449135	0.044070811	0.067705533	0.087775145	0.115689509	0.139686837	0.179136352	0.181292093	0.187496762	0.188098043	0.188188296	0.140861065	0.068894929	0.109782803
17:19:07.111	0.002087278	0.001833791	0.011472366	0.019052296	0.04440486	0.044012998	0.067551255	0.087516777	0.115368565	0.139323781	0.178646571	0.180761891	0.186921082	0.187582883	0.187615991	0.14041791	0.068691786	0.109429905
17:19:07.177	0.002134483	0.001647799	0.011398879	0.018949773	0.044213563	0.043717306	0.067378827	0.087241495	0.114999516	0.13893914	0.17809141	0.180195986	0.18630397	0.18696798	0.187010235	0.139955447	0.068448883	0.109064852
17:19:07.242	0.002166275	0.00164094	0.011359586	0.018845466	0.04413945	0.043596377	0.067252985	0.087028571	0.114685184	0.138599434	0.177624239	0.179711501	0.185814665	0.186504725	0.186513926	0.139577641	0.068251159	0.10876186
17:19:07.308	0.002175909	0.001766414	0.011308328	0.018751866	0.044044162	0.043358498	0.067091042	0.086828022	0.114369654	0.138246212	0.177134568	0.179208621	0.185281121	0.185988156	0.185997779	0.139176942	0.068054102	0.108453016
17:19:07.372	0.002239813	0.001650219	0.011217131	0.018699222	0.043875965	0.043157481	0.066901875	0.086632385	0.114080077	0.137886077	0.176662401	0.178735667	0.184758708	0.185445967	0.185492406	0.13879544	0.067865636	0.108156961
17:19:07.439	0.002272086	0.001637308	0.011112298	0.018608477	0.043690323	0.043081635	0.066707667	0.086431011	0.113781625	0.137557558	0.17621402	0.17828555	0.184294579	0.18497375	0.185031419	0.138443141	0.06766408	0.107885004
17:19:07.504	0.00227908	0.001460998	0.011089091	0.018548159	0.043575424	0.043020787	0.066665116	0.086169685	0.113452986	0.137197514	0.175737498	0.177813428	0.183773642	0.184467784	0.18451171	0.13804891	0.067467102	0.107586942
17:19:07.570	0.002244879	0.001564686	0.011065172	0.018460091	0.043420556	0.042912588	0.066380562	0.086002412	0.113154466	0.136875719	0.175272317	0.177351259	0.18327502	0.183945625	0.184025335	0.137679144	0.067277092	0.107286977
17:19:07.635	0.002405604	0.001624801	0.011061099	0.018361137	0.043264873	0.042688764	0.066147229	0.085732975	0.11284133	0.136534985	0.174799419	0.176897348	0.182780695	0.183470553	0.183550729	0.137325092	0.06709485	0.107011548
17:19:07.700	0.002443497	0.001604225	0.011009088	0.018261172	0.043073696	0.042769383	0.065855815	0.085516544	0.11251714	0.136114035	0.174262591	0.176381562	0.182218724	0.182857973	0.182983949	0.136889309	0.066874802	0.106670334
17:19:07.766	0.002465013	0.0017765	0.010997282	0.01818863	0.042970829	0.042747372	0.065656971	0.085264156	0.112215942	0.135755938	0.173790557	0.175890444	0.18171799	0.182336863	0.18249552	0.136528175	0.066688466	0.106381123
17:19:07.831	0.002368995	0.001983877	0.010998813	0.018173372	0.042873495	0.042823218	0.065452073	0.08496048	0.111884697	0.135290274	0.173237938	0.175304301	0.181075299	0.181777845	0.181857087	0.136035325	0.066446583	0.105975113
17:19:07.896	0.002270087	0.002112579	0.010897127	0.018071653	0.04275968	0.042726422	0.065302838	0.08478152	0.111551842	0.134920807	0.172711435	0.174752164	0.18052307	0.181184388	0.181274375	0.135592839	0.066208517	0.105623907
17:19:07.962	0.002344911	0.002089582	0.010865269	0.017994917	0.042639247	0.042598068	0.065159451	0.084529475	0.111222609	0.134491361	0.172172052	0.174202123	0.179950723	0.180608764	0.180693614	0.13516267	0.065970192	0.105267649
17:19:08.027	0.002416041	0.002319596	0.010823434	0.017860807	0.042499927	0.042543968	0.064954355	0.08432966	0.11089588	0.134103838	0.171655358	0.173650001	0.179397976	0.180034422	0.180107569	0.134732779	0.065733538	0.104935186
17:19:08.093	0.002404159	0.002357118	0.010854787	0.017813338	0.042304539	0.042277625	0.064744214	0.084092261	0.110559495	0.133699042	0.17111708	0.173107566	0.178848681	0.179433052	0.179522825	0.134297378	0.0655016	0.104593728
17:19:08.158	0.002332869	0.002341787	0.010840132	0.01781887	0.042174602	0.042281073	0.064539316	0.083904088	0.110258075	0.133289189	0.170616248	0.17260428	0.178340565	0.178907783	0.179000403	0.133903744	0.065320891	0.104281103
17:19:08.223	0.0022338	0.00236317	0.010861202	0.017730178	0.041915089	0.042058575	0.06431768	0.083639463	0.109927898	0.132881472	0.17007165	0.172036885	0.177757024	0.178327499	0.178414974	0.133463234	0.065126286	0.103935985
17:19:08.288	0.002207468	0.002175967	0.010861768	0.017776933	0.041725716	0.041915635	0.064118433	0.083354763	0.109575638	0.132429377	0.169494571	0.171422802	0.177152585	0.177693143	0.177752891	0.13297403	0.064879415	0.103533642
17:19:08.353	0.002217263	0.002121007	0.01084314	0.017698155	0.041644504	0.041866574	0.063835894	0.083080237	0.109219884	0.13195124	0.168896658	0.17079667	0.176507765	0.177074988	0.177094046	0.132479663	0.064639504	0.103141529
17:19:08.419	0.002112575	0.002059682	0.01081952	0.01765818	0.04157809	0.041681203	0.063692507	0.082762672	0.108842738	0.131463581	0.168275012	0.170150836	0.175845864	0.176427744	0.176404751	0.131957669	0.064407497	0.102743713
17:19:08.484	0.002185221	0.002045157	0.010770159	0.017625702	0.041449838	0.0413574	0.063446268	0.082515579	0.108499241	0.130964551	0.167660004	0.169487876	0.175193515	0.175785941	0.17573372	0.131457652	0.064171812	0.102344827
17:19:08.549	0.00220465	0.001824064	0.010655957	0.017611782	0.041387783	0.041281024	0.063343416	0.082202141	0.108174607	0.130555625	0.167162184	0.168944875	0.174665219	0.175231036	0.175157169	0.131037028	0.063974884	0.102004187
17:19:08.615	0.002166115	0.002035474	0.010590915	0.017585638	0.041249061	0.0411593	0.063372053	0.081927133	0.107837061	0.130150883	0.166656273	0.168389463	0.174088595	0.174645866	0.174566588	0.130603574	0.063749641	0.101664082
17:19:08.681	0.002152788	0.002116568	0.010556614	0.017554319	0.041228007	0.040988515	0.06308669	0.081669384	0.107525025	0.12980621	0.166196982	0.167897302	0.173608063	0.17414292	0.174073232	0.130251913	0.063569112	0.101389213
17:19:08.747	0.002145723	0.002347345	0.010527297	0.017500961	0.041115154	0.040888536	0.062955201	0.081433635	0.107181745	0.129398311	0.165663246	0.167347125	0.173048095	0.173585318	0.173478095	0.129795876	0.063338412	0.101037814
17:19:08.812	0.002216211	0.002413512	0.010536355	0.017396029	0.041011685	0.040821707	0.062685568	0.081212391	0.106873806	0.129029368	0.165159352	0.166812361	0.172519626	0.173032654	0.172934459	0.129408039	0.063131601	0.100747378
17:19:08.878	0.002255389	0.002551091	0.010487196	0.017314742	0.040846497	0.04062838	0.062634142	0.080924527	0.106543093	0.128615476	0.164650996	0.16627746	0.171956939	0.172465947	0.172380127	0.128987097	0.062929211	0.100430143
17:19:08.944	0.002258118	0.002746767	0.010402304	0.017331874	0.04073196	0.040529462	0.062294531	0.080651515	0.106200819	0.128212308	0.164119251	0.165734485	0.171372069	0.171880035	0.171805478	0.128547588	0.062716544	0.100092034
17:19:09.009	0.002154073	0.002586999	0.010362406	0.017322416	0.040633784	0.040307495	0.062162031	0.080408775	0.105881382	0.127786574	0.163565271	0.165155855	0.170773827	0.171282322	0.171218967	0.128091921	0.062499685	0.099742091
17:19:09.074	0.002102764	0.002518815	0.010294176	0.017241754	0.040490011	0.040208665	0.062024089	0.080176532	0.105540466	0.127386052	0.163032715	0.16458995	0.170196634	0.170711689	0.170640756	0.127656943	0.062284952	0.099411057
17:19:09.141	0.002171807	0.002375991	0.010311174	0.017121742	0.040361155	0.040188511	0.061712913	0.079875537	0.105181208	0.126933022	0.162459834	0.163971467	0.169550504	0.170062617	0.169985682	0.127160673	0.062024715	0.09902817
17:19:09.206	0.002103406	0.00236187	0.010227813	0.017089799	0.040321812	0.040072355	0.061545729	0.079600118	0.104819911	0.126453211	0.161887843	0.163381031	0.168926959	0.169428359	0.169349146	0.126681848	0.061777894	0.098654961
17:19:09.272	0.002136001	0.002474434	0.010244305	0.016986473	0.040300517	0.040084819	0.061310378	0.079360036	0.104515311	0.126086855	0.161407312	0.16289713	0.168413025	0.168926364	0.168845072	0.126305863	0.061598095	0.098363666
17:19:09.338	0.002152379	0.002599192	0.010172036	0.01687707	0.040136892	0.039847205	0.061265002	0.079116105	0.104189418	0.125655416	0.160920275	0.162377214	0.167891669	0.168359065	0.168311104	0.125898617	0.061393477	0.098046341
17:19:09.403	0.002167632	0.002606051	0.010221305	0.016800959	0.040043049	0.039896001	0.061112538	0.078925182	0.103864531	0.125289759	0.160443479	0.161857161	0.167327041	0.167800047	0.167756686	0.125490928	0.061166279	0.097707896
17:20:05.581	2.03E-05	0.000267217	0.000600835	0.001302635	0.005189213	0.004743666	0.006442679	0.0079855	0.010440972	0.011034485	0.011110264	0.008649127	0.007887007	0.007870198	0.004722128	0.001787257	0.00019041	0.000929237
17:20:05.647	0.00000001	0.000136901	0.00059025	0.00127551	0.005221724	0.004722716	0.006501164	0.007996982	0.010449887	0.011019537	0.011103328	0.008641522	0.007887576	0.007922382	0.004720944	0.001779081	0.000181203	0.000932938
17:20:05.713	0.00000001	0.000275645	0.000542614	0.001256038	0.005237605	0.004777346	0.006412025	0.007994438	0.010469573	0.011014059	0.011108059	0.008640507	0.007899005	0.007943877	0.004724554	0.001776661	0.000193041	0.000938987
17:20:05.778	0.00000001	0.000392647	0.000502714	0.001234802	0.00519706	0.004715555	0.006350516	0.008008051	0.010454831	0.011008442	0.011118894	0.008635453	0.007891604	0.007927793	0.004724181	0.001778051	0.000197533	0.000947921
17:20:05.843	0.00000001	0.000568957	0.000429225	0.001196256	0.005168546	0.004692218	0.006304737	0.007987357	0.010469542	0.011039777	0.011126579	0.008614692	0.007909254	0.007913341	0.004725642	0.001783303	0.000199642	0.000935927
17:20:05.908	0.00000001	0.000452359	0.000399605	0.001196256	0.005175404	0.004842584	0.006373506	0.008033283	0.010479401	0.011035181	0.011105448	0.008608486	0.007900713	0.007889147	0.004721669	0.001790367	0.000201622	0.000930925
17:20:05.973	0.00000001	0.000690398	0.000421398	0.001302794	0.005097441	0.004846679	0.006273276	0.00802572	0.010486205	0.01105491	0.011101953	0.00858987	0.007892258	0.007886541	0.004723618	0.001793466	0.000206569	0.000929612
17:20:06.039	0.00000001	0.00076665	0.000396562	0.001274419	0.005171433	0.005146614	0.006193415	0.008013964	0.010482109	0.011019537	0.011115879	0.008599947	0.007911405	0.007920064	0.004726722	0.001795645	0.000210349	0.000931344
17:20:06.104	0.00000001	0.00069887	0.000324396	0.001266567	0.005275865	0.005151918	0.006187567	0.008046552	0.010477857	0.011020605	0.011111874	0.00858837	0.007902527	0.007916685	0.004725404	0.001794564	0.000221785	0.00092101
17:20:06.170	0.00000001	0.000543539	0.000333048	0.00129976	0.00520476	0.005114261	0.006060111	0.007977731	0.010483842	0.011028914	0.011112734	0.008589183	0.007894324	0.007920755	0.00472613	0.001791361	0.000237485	0.000917767
17:20:06.235	0.00000001	0.000447113	0.00029671	0.001355974	0.005195857	0.005234129	0.006100759	0.007978075	0.010506452	0.011003429	0.01110854	0.008569618	0.00789192	0.007897568	0.004727438	0.001788766	0.000239222	0.000919598
17:20:06.301	0.00000001	0.000528611	0.000601966	0.001351066	0.005176487	0.00603979	0.006531525	0.007995126	0.010566395	0.011025758	0.011125101	0.008608793	0.007867606	0.007909321	0.004727266	0.001789343	0.000264666	0.000919626
17:20:06.366	4.79E-06	0.000321638	0.000548427	0.001365908	0.005138588	0.006222509	0.006573876	0.007998838	0.010555465	0.011023855	0.011113702	0.008622106	0.007856726	0.007909321	0.004729435	0.001793153	0.000259282	0.000903625
17:20:06.431	6.23E-05	0.000115472	0.000450814	0.00140026	0.00514713	0.006192542	0.006654342	0.007995026	0.010539999	0.010998926	0.011140371	0.008624092	0.007858961	0.007895601	0.004720485	0.001788622	0.000261228	0.00089441
17:20:06.495	0.00000001	0.000288151	0.000346687	0.001382326	0.005115849	0.006130221	0.006683988	0.008022733	0.010551937	0.010962254	0.011124106	0.008619308	0.007832264	0.007863805	0.004709033	0.001778417	0.000268669	0.000891741
17:20:06.560	0.00000001	0.000195759	0.000338952	0.001461828	0.005152304	0.006139503	0.006589404	0.007977907	0.010572663	0.010992102	0.011123811	0.008628831	0.007831184	0.007866046	0.004700838	0.001771281	0.000265574	0.00088959
17:20:06.625	1.86E-05	0.000182849	0.00036338	0.001393747	0.005120515	0.006111127	0.006575086	0.007963194	0.010573955	0.011022209	0.011109347	0.008633976	0.007822054	0.007843178	0.004694763	0.001775812	0.000274155	0.000889164
17:20:06.690	4.59E-05	0.000324103	0.000492648	0.001358502	0.005051936	0.006007966	0.006504703	0.007981551	0.010567308	0.011005637	0.011098674	0.0086261	0.007816423	0.007817384	0.004697257	0.001775462	0.000274473	0.000884052
17:20:06.756	5.57E-05	0.000375342	0.000461807	0.001330752	0.005012715	0.006049072	0.006557944	0.007968144	0.010558489	0.011013435	0.011088216	0.008621813	0.007810393	0.007791985	0.004692395	0.001767285	0.000277644	0.000872957
17:20:06.821	3.40E-05	0.000419319	0.000514599	0.001347438	0.005001646	0.006040055	0.006601706	0.007974813	0.010548345	0.011009025	0.011083108	0.008635397	0.007802886	0.007807673	0.004683236	0.00176569	0.00027299	0.000878025
17:20:06.887	9.01E-05	0.00065534	0.000454037	0.001299076	0.004978786	0.006007701	0.006667048	0.007948619	0.01053417	0.010961722	0.011077462	0.008643905	0.007799722	0.007836531	0.004684286	0.001761746	0.000284674	0.000870503
17:20:06.953	6.31E-05	0.000383546	0.000431644	0.001246521	0.005037018	0.005811074	0.006760017	0.00793095	0.010532123	0.010924632	0.011068483	0.008656338	0.007799174	0.007834519	0.004677247	0.001757267	0.000285686	0.000876447
17:20:07.019	2.71E-05	0.000337955	0.000463605	0.001205119	0.004946302	0.005607405	0.006800553	0.007918704	0.010523682	0.010923889	0.011060041	0.008641928	0.007794134	0.007822582	0.004670914	0.001748699	0.000296084	0.000877032
17:20:07.084	0.00000001	0.000233057	0.00046106	0.001198962	0.004850172	0.005375625	0.006846937	0.007889897	0.010498387	0.010904299	0.011049529	0.008645088	0.00779424	0.007823131	0.004666874	0.001744241	0.000284837	0.000865236
17:20:07.150	3.21E-05	0.000417436	0.000496177	0.001229924	0.004900704	0.005306144	0.006935672	0.007915679	0.010477409	0.010879742	0.01103399	0.008636039	0.007780048	0.007812815	0.004655135	0.001742459	0.000300975	0.000857345
17:20:07.216	9.41E-05	0.000767232	0.000461162	0.001180492	0.004871468	0.005296597	0.007012598	0.007924961	0.010455272	0.010896779	0.01104063	0.008633466	0.007775092	0.007805635	0.00464716	0.001739689	0.000308976	0.000847198
17:20:07.281	5.73E-05	0.000586081	0.000449355	0.001249822	0.004935474	0.005262387	0.007129768	0.007967793	0.010425096	0.01090532	0.011027	0.008614172	0.007781692	0.007789536	0.004647647	0.001737712	0.000301389	0.000840498
17:20:07.348	0.00000001	0.000646599	0.000457498	0.001219366	0.004915863	0.005231094	0.007068662	0.007952187	0.010432624	0.010922264	0.01101337	0.008593141	0.007776969	0.007792737	0.004635488	0.001737434	0.00028451	0.000843277
17:20:07.413	0.00000001	0.000830576	0.000541064	0.001196345	0.004942331	0.005231094	0.007046479	0.007942011	0.010447807	0.010945475	0.01099576	0.008560353	0.007765512	0.007776822	0.004628267	0.001741532	0.000277481	0.000849911
17:20:07.479	6.21E-05	0.00081	0.000637761	0.001221507	0.004946061	0.005414873	0.006949677	0.007929636	0.010438137	0.010973142	0.010992991	0.008561301	0.007780294	0.007760139	0.004623797	0.001746897	0.000284476	0.000854902
17:20:07.546	6.59E-05	0.000700259	0.000616284	0.001195988	0.004870745	0.005421002	0.006953106	0.007966487	0.010428025	0.010953366	0.010965327	0.008538531	0.007789404	0.007743217	0.004616968	0.001745497	0.000285959	0.000846608
17:20:07.611	5.84E-05	0.000756743	0.00057618	0.001218206	0.004892281	0.005477489	0.00689442	0.007992956	0.010411614	0.010956033	0.010959735	0.008528151	0.007792967	0.007731783	0.004610597	0.001739514	0.000288814	0.000833518
17:20:07.676	4.28E-05	0.000484814	0.000499434	0.001217849	0.005017407	0.00545203	0.006952299	0.007955968	0.010408843	0.010969356	0.010963792	0.008533567	0.007772555	0.007744451	0.004599451	0.001732996	0.000286379	0.000820167
17:20:07.741	0.00000001	0.000386371	0.000528138	0.001250685	0.005042432	0.005305378	0.006857312	0.008006019	0.010410953	0.010947213	0.010951475	0.008523548	0.007776856	0.007760733	0.004591638	0.001738824	0.000288282	0.000825103
17:20:07.807	0.00000001	0.000180608	0.000506593	0.001226415	0.005008022	0.005274085	0.006798223	0.007977075	0.010392464	0.010935793	0.010939983	0.008499177	0.007775654	0.00774655	0.00458774	0.001731254	0.000295174	0.000814658
17:20:07.872	0.00000001	2.16E-05	0.000592602	0.00127897	0.005035934	0.005292648	0.006694161	0.008024994	0.010379392	0.010952923	0.010928584	0.008477897	0.007761589	0.007716685	0.004582162	0.001723758	0.00028385	0.000809381
17:20:07.938	0.00000001	0.000259147	0.000633723	0.001284413	0.004985283	0.005467677	0.00672179	0.008077796	0.010352334	0.010985371	0.010912453	0.008466885	0.007755074	0.007713941	0.0045763	0.001724942	0.000297523	0.000803823
17:20:08.003	0.00000001	0.000351135	0.000616318	0.001302744	0.005007661	0.005614329	0.006760107	0.008073197	0.010353688	0.010976551	0.010913314	0.008473452	0.007718023	0.007676667	0.004570512	0.001724293	0.000288102	0.000806034
17:20:08.069	0.00000001	0.000587157	0.000650009	0.001300603	0.004982903	0.00567665	0.006703035	0.008122767	0.010362949	0.01099628	0.010909926	0.008460945	0.007707564	0.007649958	0.004561925	0.00172177	0.000286508	0.000815795
17:20:08.134	0.00000001	0.000355977	0.000667414	0.001249118	0.005033796	0.0056016	0.006741755	0.008141124	0.010367044	0.011021116	0.010892101	0.008455349	0.007702567	0.007629814	0.004554007	0.00172246	0.000253512	0.000812194
17:20:08.200	0.00000001	0.0001135	0.000696627	0.001270622	0.005137746	0.005625467	0.006671373	0.008146624	0.010369343	0.011015545	0.010875057	0.008443051	0.007699383	0.007646919	0.004534943	0.001720637	0.00024926	0.000805913
17:20:08.264	0.00000001	0.000107986	0.000693268	0.00118648	0.005064114	0.005609025	0.006533834	0.008041709	0.010381281	0.010986857	0.01086148	0.008426804	0.007691222	0.007631094	0.004523424	0.00170897	0.000250897	0.000793384
17:20:08.330	0.00000001	3.98E-05	0.000695303	0.00120843	0.005151341	0.005580649	0.006618938	0.008065084	0.010411653	0.010974184	0.010849274	0.008416243	0.007691982	0.00760905	0.004524255	0.001702503	0.000256101	0.000790952
17:20:08.394	0.00000001	0.00000001	0.000649296	0.001216907	0.005117052	0.005575876	0.006617526	0.008039234	0.010386391	0.01095724	0.010826934	0.008419741	0.007681593	0.00755865	0.004521437	0.001698415	0.000265256	0.000793599
17:20:08.460	0.00000001	0.00000001	0.000631178	0.001214766	0.005134738	0.00542445	0.006609863	0.008027821	0.010377729	0.010932172	0.010813948	0.00839555	0.007667338	0.007590049	0.004520787	0.001695758	0.00025142	0.000787125
17:20:08.525	0.00000001	0.00000001	0.000649499	0.001204415	0.005230868	0.00542999	0.006619341	0.008006577	0.010378044	0.010898842	0.010808571	0.008404667	0.007648992	0.007582412	0.004513146	0.001689371	0.000267236	0.000782388
17:20:08.591	0.00000001	0.00000001	0.000656014	0.001247423	0.005215949	0.00547852	0.006596754	0.00799715	0.010384406	0.010900049	0.010805211	0.008392436	0.007634547	0.0075686	0.004506766	0.00169003	0.000254755	0.000784941
17:20:08.657	0.00000001	0.00000001	0.000696728	0.001311221	0.005109111	0.00555914	0.006562067	0.008006432	0.010364877	0.010886354	0.010792739	0.008372917	0.007628538	0.007524283	0.004494808	0.001686086	0.00024878	0.00078396
17:20:08.722	0.00000001	0.00000001	0.000678101	0.001313808	0.005145325	0.005770765	0.006641928	0.0079757	0.01034582	0.010878029	0.010779811	0.008371721	0.007610171	0.007542256	0.004493232	0.001679639	0.000258587	0.00077925
17:20:08.788	0.00000001	0.00000001	0.000692351	0.001348518	0.005211858	0.005818765	0.006569529	0.007993162	0.010364908	0.010836343	0.010775979	0.008388036	0.007598362	0.007546698	0.004485744	0.001674563	0.000256349	0.000783243
17:20:08.853	0.00000001	0.00000001	0.000642782	0.001313898	0.005216551	0.005813461	0.006544723	0.007904198	0.010361128	0.010808769	0.010770817	0.008391466	0.007593997	0.007558314	0.004476383	0.001668847	0.000242153	0.000786138
17:20:08.919	0.00000001	0.00000001	0.000572244	0.001317199	0.005235801	0.005637902	0.006436023	0.007873466	0.010373129	0.010779338	0.010776973	0.008390293	0.007570127	0.00756211	0.004471233	0.00165614	0.000222119	0.000784775
17:20:08.985	0.00000001	0.00000001	0.000616216	0.001311003	0.005211738	0.005608996	0.006158727	0.007877866	0.010368656	0.0107941	0.010764848	0.008362221	0.007596085	0.007592707	0.004469619	0.001650765	0.00022926	0.000781802
17:20:09.050	0.00000001	0.00000001	0.000587613	0.001298065	0.005219532	0.005699692	0.006191196	0.007869134	0.010360749	0.010773907	0.010768881	0.008362902	0.007582399	0.007600071	0.004465225	0.0016544	0.000224717	0.000783368
17:20:09.116	0.00000001	0.00000001	0.000527458	0.001291105	0.005066735	0.005959082	0.006072009	0.007819633	0.010355867	0.01074545	0.010783534	0.008354102	0.007588536	0.007594481	0.004459752	0.001647964	0.00024133	0.000781764
17:20:09.181	0.00000001	0.00000001	0.000573567	0.001305471	0.005001525	0.00582675	0.006020987	0.00775645	0.010344307	0.010728275	0.01077157	0.0083569	0.00758765	0.007588855	0.004463114	0.00163606	0.000244325	0.000796002
17:20:09.247	0.00000001	0.00000001	0.000603594	0.001331793	0.004961582	0.005851944	0.005973191	0.007828089	0.010349945	0.010728507	0.010759257	0.008358637	0.007582158	0.007565256	0.004455913	0.001633898	0.000239147	0.000802588
17:20:09.312	0.00000001	0.00000001	0.000609701	0.001330098	0.004918149	0.00577265	0.005916925	0.007776457	0.010311414	0.010726046	0.01075259	0.008349994	0.007566027	0.007578474	0.004450211	0.001632435	0.000247377	0.000812184
17:20:09.377	0.00000001	0.00000001	0.000583746	0.001361863	0.004882175	0.005727832	0.005939311	0.007804851	0.010310689	0.010707292	0.010748638	0.008339998	0.007555989	0.007577742	0.004438883	0.001626772	0.000242662	0.000812134
17:20:09.443	0.00000001	0.00000001	0.000520334	0.001398535	0.00486858	0.005734993	0.0059139	0.007784363	0.010301681	0.010702325	0.010740761	0.008352342	0.007557044	0.007509297	0.00442638	0.001619687	0.000247591	0.000815537
17:20:09.507	0.00000001	0.00000001	0.000494785	0.001438955	0.004775338	0.005647213	0.005912892	0.007731425	0.010276324	0.010731245	0.010736083	0.008336952	0.00754243	0.007500973	0.004420382	0.001616848	0.000235632	0.000819926
17:20:09.573	0.00000001	0.00000001	0.000548121	0.001406833	0.00484572	0.006072055	0.005905834	0.007747864	0.010272229	0.010694433	0.010738557	0.008323615	0.007531001	0.007495622	0.0044219	0.001612699	0.000245671	0.000823654
17:20:09.638	0.00000001	0.00000001	0.000661612	0.001390971	0.004921397	0.006674577	0.006300703	0.007743395	0.010325337	0.01071523	0.010736594	0.008341578	0.007533532	0.007500333	0.004428328	0.001612163	0.000254475	0.000834468
17:20:09.704	0.00000001	0.00000001	0.00068767	0.001405336	0.00487652	0.006470908	0.006298888	0.007794684	0.010310941	0.010699323	0.010731352	0.008324405	0.007524296	0.007463424	0.004418232	0.001613255	0.000250454	0.000826163
17:20:09.769	0.00000001	0.00000001	0.000685023	0.001445667	0.004870264	0.00638472	0.006389236	0.007782721	0.010301334	0.010715524	0.010715114	0.008284938	0.00751371	0.007439734	0.004409846	0.001613996	0.000252838	0.000820263
17:20:09.834	0.00000001	0.00000001	0.000715762	0.001482697	0.004839223	0.006333272	0.006460627	0.007817028	0.010305996	0.01070754	0.010698607	0.008284915	0.007506372	0.007407429	0.004402081	0.001615386	0.000254012	0.000822683
17:20:09.900	0.00000001	0.00000001	0.00067627	0.001473328	0.004777262	0.006562665	0.006410815	0.007787878	0.01030902	0.010720538	0.010682422	0.008253797	0.00750867	0.007382641	0.004389483	0.001622049	0.000258753	0.000824558
17:20:09.965	0.00000001	0.000117937	0.00062385	0.001540249	0.004753801	0.006432985	0.006640113	0.007779215	0.01028716	0.010705265	0.010655	0.008252172	0.007472991	0.007372762	0.004379268	0.001618506	0.000247831	0.000814991
17:20:10.030	0.00000001	0.00000001	0.000587309	0.001603868	0.004793625	0.006256366	0.006584049	0.007777359	0.010290342	0.010698998	0.010626449	0.008236308	0.007472105	0.007378753	0.004363652	0.001604378	0.000252503	0.000809686
17:20:10.094	1.08E-05	0.00000001	0.000553923	0.001657137	0.004912975	0.006061418	0.00663487	0.007833735	0.010276513	0.010645428	0.010612522	0.008220472	0.007447918	0.007372727	0.004356612	0.001600733	0.000238804	0.000810248
17:20:10.160	0.00000001	4.37E-05	0.000513718	0.001617699	0.004944256	0.006161662	0.006645357	0.007864964	0.010284325	0.010635772	0.010598838	0.008213184	0.007427337	0.007334629	0.004345619	0.001606335	0.000239932	0.000802307
17:20:10.224	4.38E-06	0.000483065	0.000495396	0.001613326	0.004990336	0.006053462	0.006662902	0.007815737	0.010259472	0.010606852	0.010578298	0.008198312	0.007417372	0.007339889	0.004341082	0.001613419	0.000239821	0.000803408
17:20:10.290	2.03E-05	0.000537128	0.000448473	0.001598425	0.005008864	0.006255275	0.006557832	0.007831894	0.010267316	0.010600214	0.010571201	0.008187368	0.007409232	0.00732315	0.004326077	0.0016059	0.000242127	0.000792269
17:20:10.356	4.10E-05	0.00057465	0.000536518	0.001567374	0.004992381	0.006096159	0.006386009	0.00781065	0.010252574	0.010616183	0.010555258	0.008163809	0.007391919	0.007303666	0.004319992	0.001603325	0.000236932	0.000784808
17:20:10.421	0.00000001	0.00036687	0.000502623	0.001561664	0.005004051	0.006130634	0.006270251	0.007823094	0.010243911	0.010583409	0.010538536	0.008146411	0.007372646	0.00733655	0.00431196	0.001597631	0.000243215	0.000778797
17:20:10.487	0.00000001	0.000443123	0.000534381	0.00160369	0.005026309	0.00612533	0.006234152	0.007823094	0.010266528	0.010576493	0.010524389	0.008129847	0.007372077	0.007336077	0.004305656	0.001596107	0.00024511	0.000781842
17:20:10.552	1.95E-05	0.000721105	0.000521352	0.001620911	0.005045693	0.005510344	0.006309778	0.007766717	0.010247975	0.010578535	0.010502236	0.008121498	0.007368281	0.007327296	0.004291615	0.001581196	0.000239684	0.000768238
17:20:10.618	0.00000001	0.000836493	0.00037478	0.001618214	0.00501393	0.004889523	0.005921564	0.00775943	0.010177038	0.010530953	0.010476696	0.008092907	0.007342217	0.007316274	0.004272952	0.001574369	0.000238166	0.000752615
17:20:10.684	0.00000001	0.000646062	0.000421704	0.001641235	0.005072883	0.004971733	0.005801571	0.007676859	0.010186835	0.010511039	0.010479599	0.008081895	0.007351854	0.007287781	0.00426213	0.00156957	0.000224844	0.000755532
17:20:10.749	0.00000001	0.000578281	0.000459874	0.001567711	0.005053032	0.00504254	0.005761438	0.007676034	0.01017792	0.010516981	0.010478497	0.008080744	0.007356177	0.007276164	0.004257087	0.001562588	0.000215355	0.000763087
17:20:10.814	0.000151836	0.000484634	0.000440229	0.001570299	0.005026082	0.004860617	0.005858442	0.007656646	0.010169415	0.010501569	0.01047968	0.008057186	0.007351432	0.007266163	0.004252875	0.00156197	0.000220807	0.000757115
17:20:10.880	4.75E-05	0.000308324	0.000474022	0.001628743	0.005008035	0.004600991	0.005846745	0.007685109	0.010150169	0.010483604	0.010459087	0.008061134	0.007341099	0.007266941	0.004245444	0.001560673	0.000221921	0.000759194
17:20:10.946	0.000131765	0.000238526	0.000516568	0.001558699	0.005075651	0.004742075	0.005869332	0.007648671	0.010133915	0.010471674	0.010467878	0.008043398	0.007341816	0.007236115	0.004231092	0.001556863	0.000223147	0.00076751
17:20:11.011	0.000112016	0.000550801	0.000609092	0.001533983	0.005016698	0.005027955	0.005882037	0.007657608	0.010118953	0.010460626	0.010455162	0.008037689	0.007330966	0.007196875	0.004234072	0.001555864	0.000210134	0.000767824
17:20:11.076	7.44E-07	0.000470513	0.00064777	0.001496864	0.004925019	0.005026364	0.005847148	0.007638495	0.01012834	0.010497995	0.010430079	0.008043822	0.007311102	0.00716047	0.004226555	0.001553959	0.000216932	0.000763661
17:20:11.143	0.00000001	0.00041524	0.000614486	0.001524079	0.004889888	0.004928507	0.005995981	0.007623905	0.010106227	0.010485322	0.010423519	0.008024844	0.007296404	0.007164845	0.004220204	0.001542663	0.000216493	0.000757286
17:20:11.208	0.00000001	0.00000001	0.000682784	0.001473754	0.004795563	0.004909148	0.005877197	0.007641299	0.010088367	0.010484625	0.01041954	0.008017352	0.007291259	0.007132236	0.004211942	0.001531263	0.000229653	0.000754308
17:20:11.274	6.20E-05	0.00000001	0.00065805	0.001431044	0.004782449	0.004895358	0.005936085	0.007686606	0.010067199	0.010490567	0.010406932	0.008003745	0.007285354	0.007121214	0.004212801	0.001522842	0.00020949	0.000756944
17:20:11.339	0.00000001	0.00000001	0.000441247	0.001416232	0.00489434	0.003909364	0.00564689	0.007691213	0.010000988	0.010467914	0.010392521	0.007979306	0.007280757	0.007169876	0.004201025	0.00152173	0.000202846	0.000757286
17:20:11.405	8.04E-05	0.00000001	0.000532141	0.001433632	0.00490986	0.004063177	0.005890709	0.007673337	0.009993396	0.010472602	0.010368729	0.007973259	0.007278416	0.007158808	0.004199783	0.001521874	0.000204749	0.000755157
17:20:11.471	0.000102738	0.00000001	0.000575807	0.001431133	0.004845132	0.004340306	0.005967747	0.00771617	0.009984671	0.010449159	0.010355319	0.007970371	0.007271816	0.007144325	0.004198408	0.001519053	0.000203146	0.000748081
17:20:11.536	6.71E-05	0.00000001	0.000585274	0.001386341	0.004784481	0.004524881	0.005942538	0.007729645	0.009977678	0.010453569	0.010351313	0.007968791	0.007254019	0.007127403	0.004199659	0.001521102	0.000189756	0.00075707
17:20:11.602	1.68E-05	0.00000001	0.000606649	0.001397762	0.00475729	0.004551666	0.005834443	0.007750271	0.00998801	0.010459418	0.010335183	0.007949181	0.00724706	0.007130147	0.004198045	0.001527764	0.000168693	0.000766213
17:20:11.666	0.00000001	0.00000001	0.000601051	0.001376972	0.004689915	0.004545036	0.00586671	0.007763402	0.009981364	0.010455797	0.010307546	0.007949384	0.007228482	0.007111259	0.004199363	0.001527394	0.000182178	0.000768794
17:20:11.731	0.00000001	0.00000001	0.000587716	0.001398654	0.004667417	0.004599401	0.005851787	0.007745947	0.009967	0.01041049	0.010304319	0.007947173	0.00721505	0.007097813	0.004191693	0.001523666	0.000170974	0.000754533
17:20:11.798	0.00000001	0.00000001	0.000814088	0.001407042	0.004675237	0.00569598	0.006263193	0.007765816	0.010000358	0.01039415	0.010282704	0.007990477	0.007195629	0.007104114	0.004198551	0.001518291	0.000166045	0.000762897
17:20:11.863	5.04E-05	0.00000001	0.000754543	0.001365105	0.004710128	0.005704997	0.006288604	0.007742372	0.009978592	0.010359845	0.010270149	0.007958862	0.007186267	0.007095607	0.004192868	0.001514583	0.000188067	0.000770292
17:20:11.928	0.00000001	0.00000001	0.000719224	0.001380273	0.004735874	0.005627825	0.006284974	0.007807411	0.009993838	0.010347636	0.010236759	0.007949836	0.007175175	0.007088107	0.004186105	0.001515098	0.000199409	0.000762786
17:20:11.994	0.00000001	0.00000001	0.000636981	0.001347794	0.00479964	0.005471891	0.006293847	0.007751997	0.00998171	0.010357849	0.010238076	0.007935326	0.007177675	0.007066154	0.004175971	0.001515018	0.000209061	0.000757674
17:20:12.059	0.00000001	0.00000001	0.000638915	0.001394996	0.00487267	0.00562809	0.006212372	0.007769047	0.00995733	0.010374932	0.010234877	0.007902254	0.007178877	0.007087741	0.004171673	0.001517037	0.000212208	0.00075554
17:20:12.124	0.00000001	0.00000001	0.000682558	0.001353683	0.004864248	0.005550123	0.006072413	0.007783691	0.009954778	0.010357384	0.010229419	0.007897312	0.007169809	0.007076459	0.00417061	0.001516439	0.000204518	0.000753571
17:20:12.190	5.42E-05	0.00000001	0.000662201	0.00139107	0.00496904	0.005647479	0.00628215	0.007787266	0.009939848	0.010349678	0.010236032	0.007878966	0.007166267	0.007106645	0.004166799	0.001515482	0.000208419	0.000752777
17:20:12.255	0.00000001	0.00000001	0.000624438	0.001443506	0.00496495	0.005581445	0.006352533	0.007742784	0.009914742	0.010299776	0.010221999	0.007865856	0.007156609	0.007068913	0.004156512	0.001517603	0.000218698	0.000747902
17:20:12.321	3.75E-05	0.00000001	0.000746479	0.001446094	0.005010668	0.006787815	0.006716749	0.007696858	0.009971568	0.010295737	0.010229392	0.00788524	0.00715003	0.00705597	0.004153179	0.001520929	0.000242649	0.000745024
17:20:12.386	3.86E-05	0.00000001	0.000729583	0.001421556	0.004976259	0.006696588	0.006584454	0.007701877	0.009974214	0.010306507	0.010229446	0.007880366	0.007143113	0.007087116	0.004146989	0.001519621	0.000243318	0.000737905
17:20:12.452	2.27E-05	0.00000001	0.000683372	0.001346069	0.005076239	0.006467195	0.006477569	0.007719546	0.009950463	0.010278236	0.010222859	0.007865765	0.007124577	0.007082085	0.004139167	0.00151717	0.000240292	0.000745476
17:20:12.518	0.00000001	0.00000001	0.000657213	0.001359096	0.00511883	0.006393471	0.006496929	0.007725184	0.009938335	0.010232558	0.01021966	0.007851323	0.007113317	0.00708268	0.004133914	0.001523267	0.000252594	0.000736283
17:20:12.582	0.00000001	0.00000001	0.000629222	0.001343928	0.005136515	0.006305692	0.006616116	0.007687301	0.009914973	0.010228287	0.010213772	0.007834941	0.007110449	0.007036167	0.004125136	0.001512794	0.000269439	0.000739978
17:20:12.649	9.29E-05	0.00010812	0.000604285	0.001336165	0.005149028	0.006406731	0.006756075	0.007668394	0.00989579	0.010244395	0.010213907	0.007825869	0.007102858	0.007072618	0.004120246	0.001508809	0.000245796	0.000742493
17:20:12.714	4.02E-05	0.000223105	0.000615481	0.001354011	0.005163706	0.006353427	0.006951089	0.007668043	0.009880323	0.010243653	0.01020353	0.007810524	0.007085166	0.007071703	0.00411887	0.001511651	0.000263678	0.000751807
17:20:12.779	0.00000001	0.000295727	0.000420459	0.001355617	0.005154081	0.005433732	0.006423118	0.00765773	0.009823247	0.010241481	0.010201056	0.007750883	0.007086305	0.007058862	0.004106472	0.001507697	0.00028889	0.000744904
17:20:12.845	0.00000001	0.000633016	0.00050545	0.001386222	0.005189333	0.005602926	0.006583647	0.00763793	0.009816978	0.010236792	0.010187775	0.007766634	0.007080314	0.007026481	0.004104782	0.001507882	0.000271316	0.000729949
17:20:12.910	0.00000001	0.000614053	0.000482752	0.001411781	0.00513026	0.005686197	0.006545531	0.007595579	0.009802552	0.01019181	0.010193743	0.007778775	0.007076118	0.007041985	0.004106845	0.001506997	0.000267801	0.000734851
17:20:12.976	0.00000001	0.000594688	0.000422495	0.001390634	0.005112213	0.005754617	0.006464258	0.00760266	0.009783054	0.010162565	0.010162585	0.007764919	0.00706026	0.007041482	0.004103492	0.001504111	0.000281037	0.000737085
17:20:13.041	0.00000001	0.000751632	0.000438374	0.001373591	0.005086493	0.005700783	0.006525162	0.007575022	0.009782266	0.010130117	0.010146132	0.007780683	0.007062453	0.007037183	0.004102384	0.001500919	0.000282906	0.000741133
17:20:13.107	0.00000001	0.001047903	0.000443689	0.001406516	0.005098163	0.005863878	0.00652133	0.007534871	0.009765225	0.0101245	0.010137367	0.007771228	0.007067367	0.007044638	0.004097984	0.001506212	0.000293905	0.000746152
17:20:13.172	0.00000001	0.001206865	0.00042893	0.00146041	0.005055572	0.005748754	0.006455989	0.007527102	0.009765036	0.010088198	0.010110214	0.00777283	0.007064668	0.007037656	0.004093228	0.001505666	0.000291672	0.000754148
17:20:13.238	0.00000001	0.001189919	0.000525118	0.001401698	0.005038368	0.005758036	0.006454578	0.007499945	0.009763241	0.010074318	0.010105563	0.007785196	0.0070587	0.007022288	0.00409914	0.001503658	0.000279679	0.000751826
17:20:13.303	0.00000001	0.001400524	0.000516059	0.001366988	0.004939952	0.005676356	0.006465624	0.007503795	0.009751649	0.01005835	0.010083978	0.00778303	0.007061505	0.006981721	0.004103983	0.001499693	0.000264943	0.000757639
17:20:13.369	0.00000001	0.001247613	0.000509748	0.001411245	0.00498928	0.005541106	0.006482161	0.007477257	0.009719204	0.01002553	0.010075536	0.007760328	0.007043222	0.006943624	0.004100984	0.001502144	0.000256902	0.000768954
17:20:13.434	0.00000001	0.001272852	0.0004785	0.001416956	0.00496606	0.005620665	0.006462398	0.007453263	0.009722165	0.010022605	0.010061422	0.007749407	0.007027976	0.006949295	0.004094871	0.001505254	0.000261291	0.000768794
17:20:13.499	0.00000001	0.001209913	0.000466896	0.001396255	0.004910836	0.00560767	0.006345026	0.007411325	0.009697187	0.010010211	0.010043597	0.007753807	0.007018402	0.006931138	0.0040885	0.001500805	0.000249615	0.000774993
17:20:13.565	0.00000001	0.001233717	0.000459873	0.001384655	0.004935982	0.005618013	0.006281903	0.007401631	0.009687349	0.010007565	0.010043221	0.007753581	0.007006678	0.006961735	0.004090534	0.001509383	0.000224909	0.000768199
17:20:13.629	0.00000001	0.000803633	0.000473818	0.00132871	0.004882443	0.00545757	0.006267182	0.007390836	0.009686498	0.009982265	0.010033946	0.007745367	0.007009377	0.006940468	0.004087468	0.001509074	0.000239645	0.000767471
17:20:13.694	0.00000001	0.000930318	0.0004158	0.001293643	0.004810616	0.005268486	0.00605684	0.007371655	0.00969935	0.010001483	0.010023595	0.007730248	0.007003515	0.006935483	0.004087134	0.001511546	0.000232539	0.000772125
17:20:13.759	0.00000001	0.000984381	0.000346993	0.001254294	0.004788599	0.00519046	0.005962055	0.007338379	0.009696011	0.010008297	0.010031715	0.007732143	0.007006825	0.006921076	0.004082721	0.001510624	0.000215702	0.00077598
17:20:13.824	0.00000001	0.001050548	0.000310757	0.001268302	0.004675264	0.005133443	0.005758772	0.007307647	0.009700704	0.009972924	0.010027575	0.007733091	0.006995988	0.006903428	0.004084498	0.001511138	0.00020058	0.000774811
17:20:13.890	0.00000001	0.001057004	0.000326127	0.001247562	0.004602114	0.005001376	0.005755949	0.007320641	0.009696766	0.010001241	0.010001577	0.007716144	0.006990232	0.00691198	0.004084574	0.00150671	0.000193645	0.000769859
17:20:13.955	0.00000001	0.00106588	0.000395239	0.001330633	0.004580698	0.004998459	0.005884614	0.007304966	0.009698467	0.009993349	0.010000878	0.007717859	0.006975871	0.006889799	0.004087325	0.001509738	0.000187413	0.000777888
17:20:14.021	0.00000001	0.001040462	0.000371014	0.001292086	0.004578626	0.005040625	0.005869287	0.007254846	0.009698782	0.009985272	0.009989345	0.007711563	0.006960604	0.006854674	0.00408167	0.001502437	0.00018173	0.000776861
17:20:14.087	0.00000001	0.000649917	0.00043748	0.001253361	0.00454554	0.00505362	0.005865657	0.007243227	0.009698341	0.009956769	0.0099837	0.007707401	0.006951326	0.006835923	0.004075357	0.001503158	0.000175069	0.000775852
17:20:14.152	0.00000001	0.000325135	0.000464759	0.001220258	0.004569001	0.005066614	0.005826533	0.007234908	0.009707602	0.010022409	0.009983995	0.007692011	0.006940065	0.006796118	0.004076178	0.001504321	0.000161414	0.000777291
17:20:14.218	0.00000001	6.37E-05	0.000484709	0.001240423	0.004526771	0.004934813	0.005819878	0.007221226	0.009688608	0.010014239	0.009978322	0.007685896	0.006935131	0.006818071	0.004067783	0.001510881	0.000168203	0.00077353
17:20:14.284	0.00000001	0.00000001	0.000514125	0.001260946	0.004503551	0.004940912	0.005777169	0.00724302	0.009680827	0.010022966	0.009960576	0.007669784	0.006924124	0.006843865	0.004064053	0.001508121	0.000161473	0.00076597
17:20:14.349	0.00000001	2.42E-05	0.00054293	0.001182515	0.004455306	0.005046725	0.005658991	0.007227758	0.009685426	0.010002958	0.009950225	0.007671431	0.00691126	0.006830739	0.00405901	0.001507246	0.000149806	0.000759164
17:20:14.415	0.00000001	0.000132866	0.000604307	0.001216153	0.004442312	0.004932691	0.005695291	0.007166912	0.009692072	0.00999943	0.009947079	0.007664842	0.006919421	0.006817202	0.004058685	0.001501654	0.000144114	0.000762517
17:20:14.481	0.00000001	0.000253903	0.000608989	0.00126514	0.004444959	0.00485605	0.005759624	0.007187744	0.009695852	0.009994881	0.009928637	0.007650039	0.006930387	0.006824428	0.00405987	0.001504352	0.000169334	0.000771516
17:20:14.546	0.00000001	0.00023373	0.00059362	0.001253629	0.004438943	0.004954702	0.005786849	0.007177431	0.009705176	0.009992328	0.009910624	0.007643856	0.006933845	0.006812262	0.004059182	0.001503168	0.000185708	0.000768914
17:20:14.612	0.00000001	0.000422144	0.000622934	0.001298977	0.004519432	0.005073775	0.00566504	0.007180663	0.009691988	0.009969442	0.00989979	0.00762806	0.00690911	0.006811485	0.004057549	0.001500079	0.000184302	0.000772741
17:20:14.677	0.00000001	0.000349074	0.000631178	0.001334668	0.004556007	0.005277709	0.005723726	0.007215451	0.009672648	0.009950038	0.009889251	0.007638463	0.006908962	0.006793328	0.004052964	0.001500779	0.00021236	0.000766493
17:20:14.743	0.00000001	0.000167115	0.00068828	0.001340646	0.004557692	0.005322056	0.005724936	0.007200395	0.009648739	0.009945396	0.009878685	0.007635665	0.006888874	0.006810479	0.0040437	0.00150305	0.000211048	0.000758447
17:20:14.808	0.00000001	4.93E-06	0.000757495	0.001308881	0.004665612	0.005371912	0.005834039	0.007226108	0.009618311	0.009956816	0.009891025	0.007619598	0.006892585	0.006854242	0.004035715	0.001500239	0.000226496	0.000766559
17:20:14.874	0.00000001	2.79E-05	0.000819686	0.001252667	0.004799641	0.005376951	0.005924387	0.007218064	0.009613523	0.009923016	0.009895488	0.007609308	0.006889654	0.006821176	0.004032114	0.001508693	0.000211931	0.000766471
17:20:14.939	0.00000001	5.33E-05	0.000781618	0.001214478	0.004873513	0.005259735	0.005837467	0.007249896	0.009620989	0.009937267	0.009903956	0.007595521	0.006899902	0.006828311	0.004026326	0.00150512	0.000202244	0.000762792
17:20:15.005	0.00000001	0.00000001	0.00077205	0.001190743	0.004898658	0.005262122	0.005908858	0.007283378	0.009591411	0.009924362	0.00990323	0.007576317	0.006905849	0.006838189	0.004026412	0.00151274	0.000200564	0.000768114
17:20:15.070	0.00000001	0.000127173	0.000704159	0.001193242	0.004921638	0.005103535	0.005873499	0.00731796	0.009574275	0.009945577	0.009900327	0.007578494	0.00691053	0.006855294	0.004031044	0.001513101	0.000197092	0.000759131
17:20:15.135	0.00000001	0.000447114	0.000635657	0.001157907	0.004921397	0.005262122	0.005861802	0.007285715	0.009567534	0.009874506	0.009905274	0.007577162	0.00689849	0.006873675	0.004028838	0.001512895	0.000194162	0.000747263
17:20:15.200	0.00000001	0.000578236	0.000564815	0.001211712	0.004958574	0.005366078	0.005847886	0.007305172	0.009573362	0.009873299	0.009898741	0.007566488	0.006891299	0.006893387	0.004026058	0.001510712	0.000209154	0.00075939
17:20:15.264	0.00000001	0.000578236	0.000583747	0.00125695	0.004954483	0.00538199	0.00598724	0.007283102	0.009586497	0.009825299	0.009908016	0.007578132	0.006895073	0.006875825	0.004022538	0.001509002	0.000199673	0.000761066
17:20:15.329	0.00000001	0.000831607	0.000525627	0.001252311	0.004985885	0.005239698	0.006109654	0.007353642	0.009586529	0.009838761	0.009900192	0.007574454	0.006901167	0.006846966	0.004026387	0.001510979	0.000213174	0.000769212
17:20:15.393	0.00000001	0.000683135	0.000477177	0.001196008	0.004973853	0.005328538	0.006103402	0.007365605	0.009562338	0.009815922	0.009895676	0.007575379	0.006903234	0.006827574	0.004024726	0.00152139	0.000222664	0.000760136
17:20:15.459	0.00000001	0.000536278	0.000486439	0.001190386	0.004947265	0.00543992	0.00616713	0.007380042	0.009566716	0.009815922	0.009897773	0.007562178	0.006891678	0.006800728	0.004023398	0.001517868	0.000205288	0.0007492
17:20:15.525	0.00000001	0.000627458	0.000474022	0.00119226	0.00493768	0.005255079	0.006074362	0.007425762	0.00956174	0.009779203	0.009896133	0.007580908	0.006903719	0.006787053	0.004017438	0.001513693	0.00021488	0.000753149
17:20:15.591	0.00000001	0.000677083	0.000391677	0.001158958	0.004888953	0.005212648	0.00616229	0.007405343	0.009562264	0.009772054	0.009866318	0.007574634	0.006907093	0.006771823	0.004016588	0.001519017	0.000210088	0.000746884
17:20:15.656	0.00000001	0.000869577	0.00038894	0.001149768	0.004890878	0.005118769	0.006094529	0.007402249	0.009549665	0.009778785	0.009847579	0.007576688	0.00691344	0.006776671	0.004014496	0.001507989	0.000179133	0.000754762
17:20:15.722	0.00000001	0.000644045	0.000397185	0.001159851	0.004903872	0.005233333	0.006247596	0.007426863	0.009558296	0.009758963	0.00983239	0.007561298	0.006917397	0.006735326	0.004018288	0.001509389	0.000187131	0.000762284
17:20:15.788	0.00000001	0.00068318	0.00033652	0.001170112	0.004856228	0.005250836	0.006244773	0.007416687	0.009589417	0.009777625	0.00981556	0.007565112	0.006913896	0.006694083	0.004024687	0.001508514	0.000188134	0.000763304
17:20:15.853	0.00000001	0.000257131	0.000282574	0.001207052	0.004788973	0.005359301	0.006047742	0.0074094	0.00959115	0.009817273	0.009814297	0.007570663	0.006916764	0.006664676	0.004013627	0.001504982	0.00018762	0.000763651
17:20:15.918	0.00000001	0.000249465	0.000385072	0.001197594	0.004767437	0.005474395	0.006083639	0.007369455	0.009581763	0.009786868	0.009797655	0.00757741	0.006905482	0.006691797	0.004013531	0.001504209	0.000191743	0.000763365
17:20:15.984	0.00000001	0.000582047	0.000399118	0.001184924	0.004739525	0.005483147	0.006034028	0.007351992	0.009593953	0.00979267	0.009787601	0.007576823	0.006894391	0.006718049	0.004016941	0.001503416	0.000219261	0.000766839
17:20:16.049	0.00000001	0.000194326	0.00041744	0.001167881	0.004668059	0.005533533	0.006035709	0.007299535	0.009588283	0.009772663	0.009772546	0.007566533	0.006882666	0.006704054	0.004011974	0.001497794	0.000220804	0.000779445
17:20:16.114	0.00000001	0.00000001	0.000491947	0.001192419	0.004690437	0.005484472	0.0061313	0.007309504	0.00958381	0.009783572	0.009755931	0.007567917	0.00688855	0.006679362	0.004007122	0.00149764	0.000219741	0.000781254
17:20:16.180	0.00000001	0.00000001	0.000538259	0.001146695	0.00474157	0.005614683	0.006077657	0.007326485	0.009593732	0.009803951	0.009743164	0.007549413	0.006878491	0.00666523	0.004001162	0.001502294	0.00020511	0.000776721
17:20:16.245	0.00000001	0.00000001	0.00048299	0.00114955	0.004720275	0.00566507	0.00597178	0.007314522	0.009584219	0.00983301	0.009730044	0.007533369	0.006872608	0.006692076	0.003996501	0.001499895	0.000215809	0.000777223
17:20:16.310	0.00000001	0.00000001	0.000512813	0.001155439	0.004733148	0.005798875	0.005961495	0.007264402	0.009573037	0.00982238	0.00974112	0.007517437	0.006881907	0.006723405	0.003991487	0.001494643	0.000206679	0.000769866
17:20:16.376	0.00000001	0.00000001	0.000591901	0.001174712	0.004688873	0.00570261	0.006004047	0.007324422	0.009559335	0.009872747	0.009728243	0.00751658	0.006876973	0.006733878	0.003994839	0.00148936	0.000205865	0.000768824
17:20:16.441	0.00000001	0.00000001	0.000574394	0.001129563	0.004748428	0.005766787	0.005903011	0.007338837	0.009547743	0.009866573	0.009713859	0.00753628	0.006882203	0.006746272	0.003985821	0.00149212	0.000219392	0.000766536
17:20:16.507	0.00000001	0.00000001	0.000617245	0.001125815	0.00468402	0.0058604	0.006022601	0.007319449	0.009528969	0.009879246	0.00971066	0.007508343	0.006855802	0.00673588	0.003987092	0.001485153	0.000217789	0.000765372
17:20:16.573	0.00000001	0.00000001	0.000642997	0.001135541	0.004654905	0.005881351	0.005923782	0.007351625	0.009531206	0.009904777	0.009725554	0.007516535	0.006853292	0.006731124	0.003991285	0.001475082	0.000222581	0.000776241
17:20:16.638	0.00000001	0.00000001	0.000639118	0.001094853	0.004628797	0.005943406	0.00589091	0.007321649	0.009518512	0.009894101	0.00972378	0.0075011	0.006840344	0.006730117	0.003991352	0.001482805	0.00023178	0.000778207
17:20:16.704	0.00000001	0.00000001	0.000621305	0.001096459	0.004703391	0.005933594	0.005720499	0.007277373	0.009516622	0.00991875	0.009723673	0.007491983	0.006832648	0.006779008	0.00399331	0.001484772	0.000215397	0.000777165
17:20:16.769	0.00000001	0.00000001	0.000561863	0.001099404	0.004711813	0.00589355	0.00567351	0.007244441	0.009500001	0.00989178	0.009731684	0.007479979	0.00683541	0.00677168	0.003991228	0.001485575	0.000210811	0.000767029
17:20:16.833	0.00000001	0.00000001	0.000513718	0.001086912	0.004725288	0.005913705	0.005769326	0.007213778	0.00949704	0.009882078	0.009720527	0.007468741	0.006822716	0.006787505	0.003997541	0.001482064	0.000219547	0.000767492
17:20:16.900	0.00000001	1.28E-05	0.000503132	0.001047652	0.004602809	0.005944202	0.005644492	0.007176858	0.009476691	0.00989212	0.009707515	0.007461994	0.00682784	0.006743645	0.003996519	0.001491023	0.000221253	0.000763731
17:20:16.965	0.00000001	8.00E-05	0.000528884	0.001142858	0.00463012	0.005627471	0.005581974	0.007127082	0.009459051	0.009864082	0.00969824	0.007454795	0.00682765	0.006722789	0.003985163	0.001487213	0.000198981	0.000749541
17:20:17.031	0.00000001	0.000521394	0.000511886	0.001172571	0.004668259	0.00561156	0.005535792	0.007130863	0.009469257	0.00988149	0.009683077	0.007444821	0.006830328	0.006731342	0.003982956	0.001494483	0.000211334	0.000754339
17:20:17.097	0.00000001	0.000799778	0.000499977	0.001154636	0.00468787	0.005504156	0.005362356	0.007124607	0.009446988	0.009888081	0.009681948	0.007433102	0.006821577	0.006747487	0.003986338	0.001489488	0.000218604	0.000762147
17:20:17.163	0.00000001	0.001022486	0.000526645	0.001198933	0.004687028	0.00518884	0.005199608	0.007082049	0.009435616	0.009891424	0.009665035	0.007456232	0.006820459	0.006751694	0.003988668	0.001483125	0.000233112	0.000762489
17:20:17.228	0.00000001	0.001100712	0.000514838	0.001208212	0.004667898	0.004965811	0.005140317	0.007064793	0.009428939	0.009850666	0.009670412	0.007456773	0.006810843	0.006716387	0.00399033	0.001485611	0.000251166	0.000758524
17:20:17.294	0.00000001	0.001230625	0.000539368	0.001203394	0.004528215	0.005023623	0.005035247	0.007039148	0.009423175	0.009840314	0.009667374	0.007461851	0.006792898	0.006718308	0.003990464	0.001492706	0.000247711	0.000753208
17:20:17.359	0.00000001	0.001113219	0.000510359	0.001177429	0.004590176	0.004979866	0.005013467	0.006958778	0.009426293	0.00980378	0.009661379	0.007457428	0.006787753	0.006708795	0.003978973	0.001492871	0.000252469	0.000745962
17:20:17.425	0.00000001	0.000868725	0.000527877	0.001204911	0.004507762	0.004813854	0.005042507	0.006899949	0.009413283	0.009782752	0.009664068	0.007441676	0.006788428	0.006695806	0.003983502	0.001494086	0.000232684	0.000740745
17:20:17.491	0.00000001	0.000805382	0.00058447	0.001220615	0.00460329	0.00476718	0.004934614	0.00691865	0.009396399	0.00975397	0.009646969	0.00743089	0.006787901	0.00671722	0.003982986	0.00150463	0.000238899	0.00073426
17:20:17.556	0.00000001	0.000990164	0.000602385	0.001254789	0.004597275	0.004639887	0.004892869	0.006933363	0.009375925	0.00976033	0.009645383	0.007429762	0.006782903	0.006707662	0.003975536	0.001511334	0.000233472	0.000727918
17:20:17.622	0.00000001	0.001140654	0.000652463	0.001237836	0.0046223	0.004580748	0.00499693	0.006887437	0.009353938	0.009710567	0.009649039	0.007424143	0.006766498	0.00668548	0.003976615	0.001505887	0.000218187	0.000717578
17:20:17.688	0.00000001	0.000748898	0.000655008	0.001293514	0.004524846	0.004662163	0.005125999	0.006918787	0.009331195	0.009688702	0.009635301	0.007430958	0.006759961	0.006645233	0.003969786	0.00150634	0.000220819	0.000717998
17:20:17.753	0.00000001	0.000579043	0.000729413	0.001285127	0.004534471	0.00455582	0.00508143	0.006950207	0.009320569	0.009678304	0.009611616	0.007434704	0.006751695	0.006628997	0.003962909	0.001506546	0.000221916	0.000723016
17:20:17.820	0.00000001	0.000600426	0.000790688	0.001316981	0.004477203	0.004517897	0.004988236	0.006978395	0.009309733	0.009658528	0.009594356	0.007428272	0.006738368	0.006626289	0.003966108	0.001511355	0.000249606	0.000725282
17:20:17.884	0.00000001	0.000537891	0.000702847	0.001303775	0.004540608	0.004394051	0.005072131	0.007006858	0.009307559	0.009652989	0.009597771	0.007433598	0.006719094	0.006643622	0.003960454	0.001510819	0.0002506	0.000716779
17:20:17.951	0.00000001	0.000460427	0.000712822	0.001242446	0.004527734	0.00446972	0.005002756	0.007010777	0.00931345	0.009676385	0.009599169	0.007428272	0.006714308	0.006616181	0.003967293	0.001513589	0.000235564	0.000724561
17:20:18.015	0.00000001	0.000493511	0.000791808	0.001272873	0.004556181	0.004469985	0.00502131	0.00704377	0.009294361	0.009672253	0.009604895	0.007423466	0.006704376	0.006593679	0.003969919	0.001508924	0.000216816	0.00071464
17:20:18.081	0.00000001	0.000297431	0.00078336	0.001273587	0.004493739	0.004263664	0.005077172	0.007031395	0.009312725	0.009647325	0.009608954	0.007417193	0.006698303	0.006576529	0.003965965	0.001511797	0.00023024	0.000701736
17:20:18.146	0.00000001	0.000358353	0.000709667	0.001252529	0.004503484	0.004338184	0.00523992	0.007040952	0.009324569	0.009640641	0.009620219	0.007392787	0.006703722	0.006567336	0.00396415	0.001517461	0.00021531	0.00069636
17:20:18.212	0.00000001	0.000247851	0.000783767	0.001188999	0.004575431	0.004488814	0.005315345	0.007018676	0.009319183	0.009668261	0.009603281	0.007393577	0.006703427	0.006590295	0.003962698	0.001518661	0.000209993	0.000711492
17:20:18.278	0.00000001	0.000194998	0.000748956	0.001210502	0.004609239	0.004254382	0.005371611	0.00699812	0.009330585	0.0096736	0.009601668	0.007387732	0.006696489	0.006592536	0.003959976	0.001521473	0.000232436	0.000721121
17:20:18.343	0.00000001	4.01E-05	0.000824787	0.001251101	0.004548602	0.004358073	0.005411339	0.007015376	0.009333924	0.009687016	0.009604572	0.007384009	0.00668972	0.006577672	0.003965898	0.001519598	0.000222063	0.000731709
17:20:18.408	0.00000001	0.00018007	0.000808897	0.001256366	0.004588666	0.004365499	0.005326436	0.007051058	0.009325294	0.009695278	0.009607879	0.007376111	0.006679535	0.006592582	0.003967006	0.001514501	0.000225638	0.000747695
17:20:18.474	0.00000001	0.000232116	0.000828135	0.001273587	0.004552572	0.004379966	0.005497856	0.006997982	0.009330869	0.009735386	0.009612986	0.007386649	0.006682129	0.006588364	0.003962431	0.001512308	0.000223812	0.000750227
17:20:18.539	0.00000001	0.000164693	0.000854396	0.001279832	0.004601299	0.004438044	0.005492209	0.006972337	0.009314584	0.009714358	0.009605136	0.007372929	0.006674453	0.006589965	0.003960979	0.001510743	0.000250601	0.000737455
17:20:18.605	0.00000001	0.00000001	0.000822435	0.001379232	0.004617541	0.004381558	0.005375173	0.006994269	0.009327751	0.009713383	0.009578413	0.007372523	0.006683879	0.006598929	0.00395524	0.001517086	0.000289983	0.000722417
17:20:18.669	0.00000001	0.000200601	0.000851749	0.001346396	0.004641242	0.00435106	0.005256188	0.006999769	0.009325955	0.009718489	0.009581774	0.007365843	0.006685798	0.006627193	0.003962671	0.001518167	0.000303442	0.000720514
17:20:18.735	0.00000001	0.000290168	0.000856838	0.001343809	0.004703805	0.004404365	0.00528543	0.007036208	0.009312915	0.009720207	0.009589436	0.007354853	0.006687928	0.006667074	0.003965622	0.001511309	0.000312889	0.000718882
17:20:18.799	0.00000001	0.000149766	0.000864574	0.00134604	0.004710302	0.004339657	0.00540018	0.007006026	0.009301404	0.009706373	0.009599625	0.007364264	0.006699209	0.006667907	0.003962308	0.001510022	0.00030832	0.000708206
17:20:18.865	0.00000001	0.000253454	0.000854396	0.00142108	0.004702963	0.004426641	0.005454228	0.007001763	0.009306727	0.009695557	0.009587742	0.007369747	0.006710153	0.006696858	0.003963416	0.001500373	0.000299953	0.000719532
17:20:18.930	4.91E-05	9.36E-06	0.000817956	0.001434494	0.004734003	0.004662929	0.00555708	0.007015995	0.009311515	0.009659395	0.009582554	0.007362683	0.006710976	0.006712636	0.003961878	0.001499024	0.000325096	0.000715805
17:20:18.995	5.08E-05	0.00000001	0.000835158	0.001446718	0.004675238	0.004598222	0.005634924	0.006999639	0.009317784	0.009656899	0.009574037	0.007371191	0.006706084	0.006715426	0.003960971	0.001505316	0.000319224	0.000724418
17:20:19.061	0.000112498	0.00000001	0.000837906	0.00146617	0.004693284	0.004749913	0.005588742	0.007023702	0.009296711	0.009621851	0.009553766	0.007381345	0.006706906	0.006728827	0.003957857	0.001506132	0.000304839	0.000716262
17:20:19.126	2.93E-05	0.00000001	0.000863251	0.001481517	0.004651295	0.004844057	0.005702887	0.007032915	0.009270566	0.009594369	0.009546535	0.007382464	0.006708235	0.006718221	0.003958383	0.001502136	0.00031438	0.000709672
17:20:19.192	0.00000001	0.00000001	0.000877229	0.001476699	0.004643595	0.004883041	0.005672838	0.007052578	0.009259447	0.009578818	0.009543013	0.007377454	0.006705008	0.006706422	0.003957265	0.001510477	0.000330527	0.000705398
17:20:19.258	0.00000001	0.00000001	0.00086644	0.001473219	0.004718189	0.004741957	0.005784361	0.007078704	0.009234688	0.009602911	0.009525753	0.007371384	0.006705451	0.006713099	0.003957513	0.001504535	0.000322109	0.000703677
17:20:19.323	9.42E-05	5.21E-05	0.000772186	0.001426999	0.004735394	0.00459557	0.005784362	0.007047353	0.009231097	0.009589263	0.009535673	0.007361297	0.00671688	0.00672595	0.003954505	0.001507223	0.000326061	0.000702486
17:20:19.389	9.58E-06	0.00000001	0.000724245	0.001412901	0.004658394	0.004635084	0.005884995	0.007002527	0.0092448	0.009588984	0.009536103	0.007361116	0.006712747	0.006715065	0.003949748	0.001507254	0.000346738	0.000702271
17:20:19.454	9.12E-05	0.00000001	0.000601186	0.001386846	0.004679569	0.00484338	0.005737978	0.007012427	0.009252044	0.009561967	0.009534974	0.00735394	0.006711819	0.006711142	0.003945097	0.001501662	0.000334488	0.00070649
17:20:19.520	0.000240556	0.00000001	0.000589888	0.001356915	0.00464143	0.004882629	0.005813402	0.00697152	0.009265306	0.009556814	0.009533496	0.007357212	0.00671203	0.006725457	0.003947427	0.001503228	0.000324175	0.000711754
17:20:19.585	0.000253883	0.00012399	0.00056383	0.001255106	0.004652739	0.00503485	0.005802781	0.006940544	0.009250343	0.009560621	0.00954183	0.007352699	0.006716606	0.006744849	0.003949537	0.001499757	0.000301175	0.000719601
17:20:19.650	0.000115316	0.000146583	0.000508866	0.00125582	0.004636497	0.005026629	0.005875987	0.006935868	0.009254438	0.009535785	0.009551105	0.007347599	0.006712536	0.006718826	0.003940549	0.00149674	0.000273297	0.000709995
17:20:19.715	9.59E-05	0.0001369	0.000488509	0.00123164	0.004559136	0.004927181	0.005955243	0.00689668	0.009255352	0.009519167	0.009539921	0.007345411	0.006704629	0.006690013	0.003942526	0.001500591	0.000252457	0.000705655
17:20:19.780	1.64E-06	0.000205488	0.000498586	0.001236369	0.004571287	0.005033259	0.006008887	0.006910912	0.009269981	0.009547716	0.009531452	0.007344282	0.006708551	0.006668517	0.00394437	0.001505926	0.000237918	0.000719557
17:20:19.845	2.57E-05	0.00000001	0.00053757	0.001164094	0.004583198	0.004938585	0.006019173	0.00688953	0.009267524	0.009542331	0.009531237	0.007326794	0.006699715	0.006638276	0.003944121	0.001509931	0.000252766	0.000721548
17:20:19.911	0.000103274	0.00000001	0.000469475	0.001174623	0.004511973	0.004836219	0.006048012	0.006902799	0.009248121	0.009550037	0.009539329	0.007335437	0.006694253	0.006629495	0.003940415	0.001508984	0.000256555	0.000713833
17:20:19.977	0.000108733	0.00000001	0.000412271	0.001138932	0.004608224	0.004922673	0.006066364	0.006887673	0.009248184	0.009525887	0.00954013	0.007323657	0.006691343	0.006606627	0.003940769	0.001503331	0.000273066	0.000703598
17:20:20.042	9.80E-05	0.00000001	0.000386825	0.001124298	0.004616645	0.005082968	0.006230322	0.006862235	0.009248876	0.00955569	0.0095422	0.007313886	0.006698196	0.006592678	0.003942478	0.001503647	0.000278338	0.000716888
17:20:20.108	0.000192387	0.00000001	0.000370438	0.001112431	0.004598358	0.005028603	0.006166191	0.006836247	0.009244466	0.009539628	0.009553142	0.007329389	0.006705914	0.006591804	0.003940415	0.001504512	0.000281775	0.000727515
17:20:20.172	0.00024441	0.00000001	0.000359309	0.001150888	0.004568159	0.005184537	0.006216608	0.00679809	0.009223834	0.009523984	0.009543544	0.007336226	0.006698597	0.006584304	0.003939957	0.001498499	0.000256812	0.00072355
17:20:20.237	0.00016477	0.00000001	0.000454071	0.001136612	0.004503912	0.005456892	0.0061553	0.006766739	0.009221283	0.009490654	0.009547093	0.007346624	0.006698534	0.006548447	0.003939231	0.001497479	0.000254866	0.000725215
17:20:20.302	0.000132175	0.00000001	0.000447455	0.001166682	0.004505116	0.005592142	0.006130091	0.006754914	0.009215802	0.009470228	0.009538113	0.007350776	0.006686282	0.006542913	0.003939021	0.001490333	0.000249568	0.000735158
17:20:20.367	0.000123023	0.00000001	0.000491426	0.001134917	0.00460317	0.005529025	0.006084917	0.006750651	0.009181184	0.009496503	0.009530935	0.007355312	0.00669128	0.006540947	0.003939317	0.001490683	0.000230075	0.00071723
17:20:20.431	0.000109447	0.00000001	0.000506185	0.001159276	0.004587409	0.005287168	0.006124332	0.006741026	0.009178915	0.009497385	0.009527574	0.00734967	0.006684089	0.006577992	0.003943806	0.001489396	0.000231335	0.00071257
17:20:20.496	0.00000001	0.00000001	0.000481248	0.00115191	0.004629305	0.005202836	0.006163456	0.006749208	0.009190916	0.009492	0.009527601	0.007341028	0.006683541	0.006548534	0.003937273	0.001485369	0.000221073	0.000721683
17:20:20.561	8.28E-05	0.00000001	0.000502623	0.001215083	0.004624252	0.005060426	0.006176161	0.006770903	0.009197784	0.009529415	0.009539861	0.007344119	0.006666798	0.006529828	0.003939489	0.001484216	0.000216693	0.000728692
17:20:20.627	0.000200326	0.00000001	0.000492546	0.001204465	0.004615228	0.004892558	0.006146314	0.006764853	0.009199516	0.009537493	0.009509723	0.007343014	0.006665533	0.006540804	0.003942937	0.001484515	0.000241039	0.00074261
17:20:20.693	0.000238219	0.00000001	0.000502216	0.001202323	0.004643622	0.004955674	0.006028942	0.006766777	0.009207107	0.00955323	0.009520934	0.00734175	0.00666393	0.006532389	0.003937177	0.001486976	0.000245162	0.000745952
17:20:20.758	0.00033793	0.00000001	0.000469644	0.001209461	0.004626177	0.004933398	0.0059152	0.006738796	0.009200492	0.009512936	0.009537414	0.007336447	0.006656234	0.006558504	0.00393455	0.001481658	0.000239762	0.000739809
17:20:20.824	0.000255881	0.000214768	0.000440941	0.001249703	0.00462762	0.005097023	0.00583675	0.006773584	0.009201028	0.009518646	0.009533408	0.007338005	0.006654884	0.006585681	0.003937425	0.001477497	0.000231901	0.000737178
17:20:20.890	0.000238219	0.000273269	0.000454783	0.001214994	0.004664797	0.005070504	0.005867808	0.006793934	0.00920547	0.009516743	0.009514723	0.007337147	0.00665615	0.00661024	0.00394007	0.001477446	0.000212012	0.000751554
17:20:20.955	0.000117154	0.00014376	0.000433477	0.001211871	0.004650359	0.005081907	0.005873253	0.006788641	0.00918846	0.009489168	0.009503351	0.007352176	0.006655496	0.006623641	0.003939287	0.001475448	0.000204426	0.000771269
17:20:21.021	8.22E-05	0.00027569	0.00047582	0.001197505	0.004589963	0.005025833	0.005818398	0.006767671	0.009199579	0.009476805	0.009500663	0.007345068	0.006649824	0.006609646	0.003939755	0.001471648	0.000197971	0.000771727
17:20:21.087	1.86E-05	0.000403854	0.00052997	0.001223559	0.004556275	0.005058452	0.005852279	0.006801016	0.009202635	0.009483536	0.009498431	0.007332972	0.006627725	0.00662515	0.003935218	0.001474264	0.000195879	0.000770811
17:20:21.153	0.00000001	0.000194057	0.000480604	0.001214547	0.004581902	0.004893501	0.005806097	0.00685368	0.009227142	0.009487528	0.009514239	0.007322141	0.006632153	0.006627101	0.003932372	0.00147137	0.000196397	0.000770866
17:20:21.218	8.83E-06	0.000259417	0.000338002	0.00121999	0.004660706	0.004943358	0.005722202	0.006844123	0.009229914	0.009489849	0.009509965	0.007314428	0.006631985	0.006656784	0.003928045	0.001463359	0.000197597	0.00076919
17:20:21.283	1.76E-06	0.000052847	0.000374543	0.001234891	0.004648074	0.004991093	0.005629232	0.006861792	0.009213408	0.009486275	0.00950932	0.007308178	0.006632912	0.006647682	0.003931139	0.001471154	0.000214828	0.000765583
17:20:21.349	2.78E-05	0.00000001	0.000379123	0.001261481	0.004633877	0.005036441	0.00578714	0.006816966	0.009242671	0.009444124	0.009518756	0.007309148	0.006620576	0.006625043	0.003930729	0.00146719	0.000219286	0.000769366
17:20:21.414	1.11E-05	0.000011291	0.00044447	0.001287625	0.00461222	0.00517169	0.005874777	0.006833054	0.00923256	0.009427413	0.009515691	0.007322778	0.006626565	0.006576701	0.003933374	0.001472689	0.000220289	0.000777329
17:20:21.480	1.40E-05	0.00000001	0.000445488	0.001301991	0.004585123	0.005151535	0.005833838	0.006789397	0.009219897	0.009414136	0.009533086	0.007319325	0.006635864	0.006592531	0.003934473	0.001473306	0.000223855	0.000769135
17:20:21.545	1.60E-06	0.000279992	0.000461977	0.001261392	0.004565151	0.005155779	0.005940319	0.006811122	0.009235962	0.009380852	0.009517277	0.007318265	0.006650225	0.006580868	0.003932324	0.001471793	0.000219491	0.000760069
17:20:21.611	2.50E-05	7.99E-05	0.000428286	0.001278345	0.004534231	0.005394925	0.006030062	0.006854229	0.009234104	0.009371382	0.009530989	0.007317452	0.006640419	0.006555348	0.003931264	0.001468353	0.000222303	0.000755613
17:20:21.677	0.00000001	0.00000001	0.000430017	0.001301188	0.004453742	0.005508163	0.006075237	0.006851617	0.009220717	0.009383498	0.009520235	0.007303642	0.006644468	0.006577575	0.00393135	0.001463153	0.000219003	0.000752029
17:20:21.742	0.00000001	5.97E-05	0.00039032	0.001260946	0.00442583	0.005393864	0.006244841	0.00687293	0.009200431	0.009366694	0.009497921	0.007290012	0.006638711	0.006566187	0.003930577	0.001463425	0.000228784	0.000746773
17:20:21.808	4.77E-07	0.00000001	0.000443656	0.001246937	0.00440297	0.005289643	0.006299493	0.006859661	0.00918991	0.009337216	0.009505953	0.007286808	0.006640039	0.006551857	0.003930711	0.001459595	0.000233645	0.000746239
17:20:21.873	3.00E-05	0.00000001	0.000500961	0.001296012	0.004361342	0.005308737	0.00629788	0.006834085	0.009195076	0.009363166	0.009513777	0.00728516	0.006636434	0.006512342	0.003930405	0.001461881	0.000239002	0.000741287
17:20:21.939	0.000149802	0.000151289	0.000430254	0.001295299	0.004261362	0.005344538	0.006294855	0.006828104	0.009183012	0.009381734	0.0095216	0.00727979	0.006631073	0.006520208	0.003928734	0.001458977	0.000238599	0.000727842
17:20:22.004	0.000103238	0.00055071	0.000404807	0.001347854	0.004281214	0.005173222	0.006409403	0.006863717	0.009155796	0.009389363	0.009512486	0.007279902	0.006631747	0.006543807	0.003927807	0.001463405	0.000239019	0.000713008
17:20:22.069	0.000100509	0.000302316	0.000319409	0.001287	0.004285184	0.005030548	0.006443889	0.006874786	0.009152268	0.009416008	0.009506895	0.007286808	0.006647267	0.006525925	0.003934063	0.001462014	0.000234313	0.00070794
17:20:22.133	0.000104469	0.00033782	0.000376002	0.001294763	0.004182317	0.004887873	0.00653827	0.006884687	0.009132265	0.009407746	0.009510847	0.007291298	0.006646044	0.0065253	0.003933204	0.00145908	0.00024738	0.000706267
17:20:22.199	0.000182824	0.00000001	0.000430254	0.001274062	0.004179189	0.00469985	0.006571142	0.006921538	0.009117902	0.009412991	0.009519396	0.007293595	0.006649228	0.006490267	0.003941389	0.001468059	0.00025372	0.000700311
17:20:22.265	0.000144771	0.000220818	0.0003588	0.001250774	0.004266054	0.00478869	0.006614098	0.006953988	0.009124107	0.009422554	0.009514798	0.007294159	0.006651906	0.006521961	0.00393798	0.001463508	0.000236575	0.000697946
17:20:22.330	0.000108644	0.000382604	0.000385672	0.001197237	0.004251978	0.004771453	0.006382581	0.007047147	0.00910672	0.009439312	0.009502593	0.007289556	0.006662049	0.00653838	0.003938744	0.001462344	0.000231389	0.000708771
17:20:22.396	0.000200326	0.000428329	0.000364805	0.001135402	0.004155006	0.00476111	0.006303123	0.006997852	0.009095947	0.009450035	0.009499394	0.007281026	0.006662513	0.006531108	0.003933987	0.001453231	0.000230043	0.000705638
17:20:22.462	0.000180416	0.000375073	0.00037875	0.001174841	0.004142975	0.00479532	0.006265814	0.007070522	0.009083347	0.009471064	0.009464444	0.007289466	0.006664011	0.006540525	0.003938161	0.001449709	0.000213892	0.000710816
17:20:22.527	0.000118759	0.00000001	0.000370913	0.001233999	0.004139004	0.004742016	0.006190592	0.007045841	0.009067314	0.009487776	0.009471649	0.007289736	0.006665866	0.006546059	0.003934063	0.001452321	0.000221573	0.000719789
17:20:22.593	0.000116511	0.00000001	0.00044257	0.001173324	0.004209026	0.004620351	0.006146628	0.006968289	0.009067723	0.009479559	0.009473558	0.007293911	0.006675482	0.006563027	0.003933481	0.001455791	0.000220442	0.000726472
17:20:22.659	0.000111855	0.00000001	0.00044145	0.001162438	0.004258836	0.004621411	0.006265209	0.006971451	0.009069676	0.009455513	0.009469149	0.007312257	0.006680543	0.006558682	0.003935668	0.001453021	0.000233378	0.000741885
17:20:22.724	8.41E-05	0.00000001	0.000527968	0.00117145	0.004284703	0.004553522	0.006124646	0.006969916	0.009062903	0.00948253	0.009476434	0.007312844	0.006680712	0.006571396	0.003928065	0.001448964	0.000223631	0.000743716
17:20:22.790	5.06E-06	0.00000001	0.00047634	0.001181305	0.004308405	0.00459171	0.006159131	0.006990404	0.009051564	0.009490515	0.009473941	0.007318666	0.006683389	0.006575025	0.00392137	0.001454967	0.000234869	0.000739343
17:20:22.856	5.06E-06	0.00000001	0.00044784	0.001172739	0.00429878	0.004733854	0.006150661	0.006951147	0.009039405	0.009468465	0.009454234	0.007321893	0.006687016	0.006605484	0.003924665	0.001456419	0.000231603	0.000743176
17:20:22.921	0.00000001	0.00000001	0.000463617	0.0012062	0.004394067	0.004764882	0.006096412	0.006939528	0.009072102	0.009454631	0.009460229	0.007320629	0.006686325	0.006593319	0.003917806	0.001465049	0.000223819	0.000732985
17:20:22.986	0.00000001	0.00000001	0.000439596	0.001205486	0.004415951	0.0049118	0.005912892	0.006901095	0.00909076	0.009473385	0.009447781	0.00732688	0.006682256	0.006572555	0.003917634	0.001457892	0.000225877	0.000748486
17:20:23.051	0.00000001	0.00000001	0.000449876	0.00125126	0.004464918	0.00504864	0.005787857	0.006902264	0.009077215	0.009443629	0.009435146	0.007319455	0.00668603	0.006569674	0.003915705	0.001453608	0.000218599	0.000758385
17:20:23.117	0.00000001	0.00000001	0.000430129	0.001310864	0.004499328	0.005038032	0.005764464	0.006882189	0.009085373	0.00947271	0.009427027	0.007310316	0.006691239	0.006572326	0.003914673	0.001457882	0.000208792	0.000762987
17:20:23.182	0.00000001	0.00000001	0.000451911	0.001358869	0.00448116	0.005155631	0.005672704	0.006884389	0.009101658	0.009458505	0.009422537	0.007311924	0.006690037	0.006579486	0.003913422	0.00145438	0.000203084	0.000761674
17:20:23.248	0.00000001	0.00000001	0.000503924	0.001371003	0.004403077	0.004945597	0.005753775	0.006856132	0.009105344	0.009437569	0.009411595	0.007328239	0.006692525	0.006579441	0.003913899	0.001450776	0.000188948	0.000768143
17:20:23.313	0.00000001	0.00000001	0.000447738	0.001466834	0.004446631	0.005097288	0.005769102	0.00683035	0.009105123	0.009400385	0.009415009	0.007330857	0.006690754	0.006573083	0.003904443	0.001456461	0.000190534	0.000769692
17:20:23.379	0.00000001	0.00000001	0.000465856	0.001458625	0.00453097	0.004951697	0.00584009	0.006905014	0.009105123	0.00935596	0.009427107	0.007333903	0.006696258	0.006570111	0.003905742	0.001465533	0.000181799	0.000764017
17:20:23.444	0.00000001	0.00000001	0.000469418	0.001437211	0.004555393	0.005012691	0.005870743	0.006884114	0.009118825	0.009345933	0.009449744	0.007335844	0.00668253	0.006574964	0.003903718	0.001473369	0.00018918	0.000763824
17:20:23.510	0.00000001	5.90E-05	0.000399492	0.001347893	0.004601473	0.005267808	0.005930236	0.006909208	0.00911495	0.009341848	0.009446384	0.007330653	0.006679915	0.006572174	0.003905714	0.001472508	0.00018882	0.000771561
17:20:23.575	0.00000001	0.00000001	0.000393792	0.001411691	0.004602917	0.005285576	0.005910674	0.006968953	0.009106729	0.009359674	0.009442486	0.007332707	0.006679852	0.006588273	0.003907366	0.001472168	0.000185545	0.000767066
17:20:23.640	0.00000001	0.00000001	0.000432267	0.001411513	0.004558882	0.00529035	0.005823754	0.007010617	0.009104146	0.009376942	0.009453239	0.007334535	0.006668802	0.006589279	0.003901664	0.001474979	0.000177598	0.000758243
17:20:23.706	0.00000001	0.00000001	0.000368141	0.001378142	0.004544685	0.005414196	0.005794512	0.006975783	0.009124809	0.009388548	0.009438614	0.007349586	0.006680315	0.006593852	0.003906784	0.001480396	0.000181507	0.000751554
17:20:23.771	0.00000001	0.00000001	0.000373966	0.001364182	0.004563574	0.005242085	0.005797739	0.006961826	0.009135361	0.009393607	0.009433856	0.007354347	0.006689025	0.006608579	0.003914205	0.001477739	0.000166342	0.000755662
17:20:23.835	0.00000001	0.00000001	0.000366841	0.001334648	0.004603397	0.005120095	0.005809033	0.007018547	0.009141819	0.00937996	0.009443669	0.007347284	0.006688694	0.006607898	0.003914816	0.00147814	0.000173672	0.00074749
17:20:23.900	0.00000001	4.61E-06	0.000364907	0.00129048	0.004584629	0.005136272	0.005859988	0.006987333	0.009125093	0.009413615	0.009433453	0.00733819	0.006702105	0.00658686	0.003924923	0.001477131	0.000193715	0.00075173
17:20:23.966	0.00000001	0.000225705	0.00036623	0.001257466	0.004578025	0.005156957	0.005887012	0.006990633	0.009117428	0.009394907	0.009453617	0.007340921	0.006700861	0.006598751	0.003928457	0.001480869	0.000190234	0.000746756
17:20:24.031	0.00000001	0.00000001	0.000454071	0.001224452	0.004539885	0.005157753	0.005804125	0.006956189	0.009147604	0.009389151	0.009470473	0.007339589	0.006697445	0.006614758	0.003926957	0.001486832	0.000201824	0.000742995
17:20:24.097	1.41E-05	0.00000001	0.000422009	0.001137098	0.004622661	0.005425864	0.005769438	0.0069214	0.009160834	0.009380449	0.009479936	0.007334986	0.006695147	0.006623128	0.003934684	0.001489118	0.000201404	0.000737624
17:20:24.163	1.41E-05	0.00000001	0.000400227	0.001109794	0.004561903	0.00544378	0.005899313	0.006891562	0.009150755	0.009359978	0.009488566	0.00733661	0.006689031	0.006626304	0.003934417	0.001490086	0.000199248	0.000746618
17:20:24.228	0.00000001	0.00000001	0.000414273	0.001076244	0.004589695	0.005414874	0.005821872	0.006877124	0.00914436	0.009367173	0.009499884	0.007337942	0.006681988	0.006583404	0.003940377	0.001493813	0.000224991	0.000742758
17:20:24.294	0.00000001	0.00000001	0.000433613	0.001014945	0.004558895	0.005152066	0.005868458	0.006830556	0.009113932	0.009410623	0.009491254	0.007329999	0.006678888	0.006618117	0.00394733	0.001495141	0.000222351	0.000742554
17:20:24.359	2.54E-05	0.00000001	0.000371015	0.001045193	0.004571889	0.005264243	0.005742616	0.006802299	0.009135572	0.009468557	0.009475284	0.007339048	0.006671845	0.006613909	0.003950225	0.001492226	0.000253812	0.000751704
17:20:24.425	0.00000001	0.00000001	0.000359004	0.001000341	0.004538322	0.005227646	0.0058856	0.006754723	0.009123949	0.009500959	0.009455605	0.007339409	0.006684603	0.006609793	0.003951361	0.001492381	0.00026061	0.000747237
17:20:24.491	0.000130248	0.00000001	0.000429847	0.001075025	0.004515463	0.004941767	0.005954773	0.006690165	0.009114562	0.00948745	0.009445685	0.007332865	0.006679437	0.006613284	0.003949317	0.001501546	0.000257078	0.000734846
17:20:24.556	0.00000001	0.00000001	0.000466693	0.00102934	0.004540367	0.004944419	0.005935211	0.006645133	0.00913069	0.009483458	0.009455201	0.007331759	0.006690254	0.006601485	0.00394841	0.001502606	0.000265685	0.000729392
17:20:24.621	0.00000001	1.23E-05	0.000407556	0.001075114	0.004573333	0.004894827	0.00584688	0.006613232	0.009133147	0.009470553	0.009445299	0.007320634	0.00669249	0.00657752	0.003953014	0.001508136	0.000271943	0.000732111
17:20:24.685	0.00000001	3.32E-05	0.000521861	0.001110091	0.004636618	0.005043336	0.005938438	0.006627945	0.009134218	0.009451938	0.009444493	0.007316008	0.006677624	0.006540337	0.003958763	0.00150653	0.000262084	0.000749792
17:20:24.751	0.00000001	0.000127621	0.000596266	0.001108485	0.004676802	0.005092662	0.005959613	0.006651939	0.009146535	0.009465447	0.009450676	0.007299061	0.00666921	0.006507362	0.003958974	0.001509712	0.000255415	0.000758505
17:20:24.816	0.00000001	0.000456841	0.000643291	0.00113454	0.004626752	0.005039358	0.005947917	0.006653383	0.009142093	0.009465911	0.009471995	0.007313142	0.006678818	0.006499353	0.003961705	0.001510504	0.000264005	0.000758919
17:20:24.881	0.00000001	0.000245026	0.000737239	0.001153902	0.004582838	0.004855048	0.005837065	0.006771361	0.009138344	0.009441354	0.009481835	0.00732113	0.00666838	0.006500954	0.003962517	0.001513892	0.000249046	0.000762233
17:20:24.946	0.00000001	0.000149138	0.00073103	0.001144712	0.004550233	0.004749766	0.005953429	0.006768473	0.009124705	0.009455605	0.009470624	0.007317633	0.006665175	0.006488422	0.003959776	0.001518784	0.000264125	0.000769308
17:20:25.012	0.00000001	0.000147121	0.000665378	0.001196018	0.004573333	0.004736771	0.006137755	0.006766273	0.009112105	0.009485501	0.009452155	0.007327043	0.00667264	0.006479733	0.003964743	0.001514067	0.000246337	0.000773819
17:20:25.077	0.00000001	0.000301645	0.000642069	0.001196107	0.004567197	0.00464024	0.006105084	0.00678683	0.009097489	0.009503094	0.009441696	0.007342884	0.006681981	0.006443877	0.003966733	0.001511781	0.000229149	0.000777486
17:20:25.143	0.00000001	0.000222568	0.000633316	0.001190039	0.004558775	0.004580837	0.005978839	0.006775555	0.009096544	0.009517764	0.009433282	0.007339702	0.006694549	0.006479362	0.00397168	0.001514294	0.000231992	0.000774172
17:20:25.209	0.00000001	3.94E-05	0.000662935	0.001198784	0.004599441	0.004543444	0.006138561	0.006850769	0.009102278	0.009515628	0.00943925	0.007334421	0.006698008	0.006498068	0.003966771	0.001519865	0.000231124	0.000778815
17:20:25.274	0.00000001	0.00000001	0.000694998	0.001272754	0.00458729	0.004736771	0.006147838	0.006905175	0.009124642	0.009508944	0.009444143	0.007331217	0.006696553	0.006485719	0.003967401	0.001521823	0.000242774	0.000776703
17:20:25.339	0.00000001	0.00000001	0.000699171	0.001316654	0.004493205	0.00472139	0.006334584	0.0069192	0.009110562	0.009486986	0.009449305	0.007317113	0.006702478	0.006495827	0.003971002	0.001527146	0.000211973	0.00077388
17:20:25.405	0.00000001	0.00000001	0.000694387	0.001394431	0.00453375	0.004612925	0.006212171	0.006947113	0.009146566	0.0094667	0.009466296	0.007322393	0.006700918	0.006473325	0.003977955	0.001529783	0.000193988	0.000777458
17:20:25.470	0.00000001	0.00000001	0.000720851	0.001359007	0.00449009	0.004648992	0.006234354	0.007005002	0.009150598	0.009463497	0.009492455	0.007332571	0.006696869	0.006493387	0.003984011	0.001526003	0.000180726	0.0007838
17:20:25.535	0.00000001	0.00000001	0.000639626	0.001335362	0.004465907	0.004509765	0.006243832	0.007004658	0.009137148	0.009474453	0.009508801	0.007318512	0.006698535	0.00649979	0.003986809	0.001523388	0.000161087	0.00079559
17:20:25.601	0.00000001	0.00000001	0.000667821	0.001310735	0.00450164	0.004446383	0.006372699	0.00695997	0.00912965	0.009475567	0.009522897	0.007331691	0.006706904	0.006516072	0.00399275	0.001527569	0.000164267	0.000799373
17:20:25.666	0.00000001	0.00000001	0.000560743	0.001330365	0.004486962	0.004206382	0.006252302	0.006988296	0.009118059	0.00949887	0.009537629	0.007336723	0.006711079	0.006560664	0.0039919	0.001529	0.000180461	0.000802526
17:20:25.732	0.00000001	0.00000001	0.000496822	0.001344285	0.004334887	0.004388306	0.006158324	0.006938519	0.009106341	0.009505648	0.0095258	0.007355385	0.006706039	0.00655952	0.003990324	0.001531389	0.000190653	0.000797072
17:20:25.798	0.00000001	0.00000001	0.000454173	0.001339199	0.004384095	0.00441509	0.006154291	0.006919131	0.009110688	0.009507551	0.00952373	0.007358657	0.006702982	0.006546796	0.00399147	0.001533294	0.000181892	0.000807506
17:20:25.863	0.00000001	0.00000001	0.000389743	0.001391665	0.0043551	0.00472139	0.006217615	0.006873847	0.00911724	0.009516325	0.009519267	0.007359898	0.006707684	0.006566325	0.003994297	0.001527239	0.00018593	0.000814481
17:20:25.929	0.00000001	0.00000001	0.000418752	0.001417095	0.004370018	0.00485823	0.006026231	0.006903891	0.009131982	0.009496132	0.009534457	0.007367525	0.006717025	0.006600763	0.003993715	0.001524325	0.000167705	0.00081098
17:20:25.994	0.00000001	0.00000001	0.000484811	0.001378727	0.004307335	0.004788749	0.005984687	0.006901897	0.009136077	0.009476449	0.009565723	0.007369014	0.006711079	0.00659555	0.003994173	0.001519351	0.00018983	0.000809135
17:20:26.060	0.00000001	0.00000001	0.000570311	0.001427653	0.00431684	0.004633876	0.00604418	0.006961299	0.009144329	0.009465215	0.009584596	0.007361929	0.00669364	0.006632778	0.003991285	0.001523283	0.000207078	0.000812113
17:20:26.126	0.00000001	0.00000001	0.000638711	0.001406863	0.004392998	0.004671798	0.006098832	0.00697003	0.009161528	0.009481741	0.009586828	0.007365268	0.006682442	0.006612522	0.003993205	0.001525528	0.000192951	0.000818323
17:20:26.191	0.00000001	0.00000001	0.000597386	0.001442197	0.004412729	0.004868573	0.005958672	0.006936823	0.009139824	0.009517671	0.009570213	0.007366838	0.006685817	0.006652174	0.004000464	0.001526413	0.000184584	0.000804724
17:20:26.257	0.00000001	2.85E-05	0.000513921	0.001404454	0.004418504	0.004794053	0.005989124	0.006914272	0.009152834	0.009491118	0.009568062	0.007380378	0.006692374	0.006626883	0.00400865	0.001524354	0.000189779	0.00080356
17:20:26.323	0.00000001	0.000342394	0.000543541	0.001365194	0.004524138	0.004812322	0.005875785	0.006907879	0.009152393	0.009499288	0.009571476	0.007391593	0.006675083	0.006660956	0.004005775	0.001524652	0.000212102	0.000820507
17:20:26.388	0.00000001	0.000224585	0.0005659	0.001317368	0.004557705	0.004848919	0.005850173	0.006927198	0.009116452	0.009517253	0.009562309	0.007386538	0.006675652	0.006659081	0.004004075	0.001518216	0.000218686	0.000838484
17:20:26.455	0.00000001	0.00000001	0.000503302	0.001299165	0.004557572	0.005061074	0.005754582	0.006901072	0.009134879	0.00953234	0.009558491	0.007398318	0.006679954	0.00664849	0.004006597	0.001513315	0.000233062	0.000832997
17:20:26.519	0.00000001	2.63E-07	0.000524778	0.00133093	0.004504634	0.005154423	0.00571687	0.006915579	0.009153338	0.009520503	0.009531956	0.007417566	0.00666785	0.006632529	0.004014524	0.001518082	0.000256405	0.000823506
17:20:26.585	0.00000001	0.000197553	0.00053628	0.001274806	0.004452539	0.005207727	0.005631967	0.006876253	0.009161371	0.009538978	0.009527977	0.007413978	0.006664795	0.006633855	0.004013474	0.001514004	0.000252976	0.000823115
17:20:26.651	0.00000001	0.000421471	0.000539028	0.001211543	0.004410068	0.005323352	0.005744902	0.006886703	0.009183199	0.00952547	0.009533354	0.007424336	0.006671268	0.006597496	0.004015728	0.001516157	0.000248166	0.000819293
17:20:26.717	0.00000001	0.00054614	0.000561421	0.001250804	0.004469262	0.00521144	0.005797135	0.006889866	0.009175639	0.009504348	0.009534564	0.00741549	0.006683161	0.006567036	0.004019013	0.001519761	0.00024196	0.000823098
17:20:26.782	0.00000001	0.000944351	0.000592466	0.001227694	0.004442071	0.005086003	0.005796126	0.006890347	0.00916852	0.00950017	0.009521014	0.007416077	0.006682402	0.006596591	0.004013368	0.001519709	0.000231219	0.00082542
17:20:26.848	0.00000001	0.000681297	0.000626259	0.001181028	0.004553361	0.005007771	0.005746314	0.006861998	0.009175136	0.009510104	0.009529617	0.007431557	0.006696193	0.006589502	0.004011	0.001524096	0.000222055	0.00082751
17:20:26.913	0.00000001	0.000608271	0.000610685	0.001161487	0.004569843	0.004963748	0.005766884	0.006852854	0.009180238	0.009541949	0.009509292	0.007438484	0.006707454	0.006553006	0.004016969	0.001523715	0.000219689	0.000821466
17:20:26.979	0.00000001	0.000533632	0.000563661	0.001142213	0.004583078	0.005019704	0.005621682	0.006831679	0.00915718	0.009546406	0.009478133	0.007429639	0.006707264	0.006543813	0.00402227	0.001529214	0.000208587	0.00082014
17:20:27.044	0.00000001	0.00041663	0.000607022	0.001127193	0.004502829	0.005150975	0.005616438	0.006783897	0.009149369	0.009528487	0.009458293	0.007438011	0.006719727	0.00651221	0.00402206	0.001529885	0.00020743	0.000816136
17:20:27.110	0.00000001	0.000438013	0.000600813	0.001185191	0.004470465	0.005077516	0.005756397	0.006809953	0.009154535	0.009517764	0.009448104	0.007439297	0.006723501	0.006499358	0.004020332	0.001528814	0.000223615	0.000806684
17:20:27.175	0.00000001	0.000494093	0.000603968	0.00119804	0.004477203	0.005114644	0.005727962	0.006762927	0.009176144	0.0094907	0.009464503	0.007430236	0.0067227	0.006452348	0.00401546	0.00152589	0.000226876	0.000820366
17:20:27.239	0.00000001	0.000385429	0.000619745	0.001142094	0.004461322	0.005114378	0.005706383	0.006773515	0.009173127	0.009519234	0.009471009	0.007436351	0.006721055	0.006469361	0.004009783	0.001529793	0.000222993	0.00083016
17:20:27.304	0.00000001	0.00018249	0.000665244	0.001048673	0.004414761	0.005234541	0.005684401	0.006731439	0.009174009	0.009532046	0.009474101	0.007443437	0.006741594	0.006455778	0.004013135	0.001525972	0.000208625	0.000820923
17:20:27.369	0.00000001	0.00000001	0.000632808	0.001043319	0.00428771	0.005306143	0.005697711	0.006705107	0.009179269	0.009503961	0.009471788	0.007449258	0.006745981	0.006504531	0.004013727	0.001528423	0.000227956	0.000804837
17:20:27.434	0.00000001	0.00000001	0.000658661	0.001090253	0.004340167	0.005230828	0.005621121	0.006708675	0.009176214	0.009507675	0.009468535	0.007453027	0.006755861	0.006534651	0.004015198	0.001530884	0.00022451	0.00080476
17:20:27.499	0.00000001	0.00000001	0.000671486	0.001106671	0.004398759	0.005071446	0.005761685	0.006717887	0.009146731	0.009516402	0.009467878	0.007454584	0.006761555	0.006556055	0.004008627	0.001527538	0.000206491	0.000810054
17:20:27.565	0.00000001	0.00000001	0.000694185	0.001109705	0.004470586	0.005050761	0.005777012	0.006799771	0.009147235	0.009505864	0.009460969	0.007462076	0.0067698	0.006536663	0.004008608	0.00152865	0.000201356	0.000811929
17:20:27.630	0.00000001	0.00000001	0.000713626	0.001123892	0.004500303	0.005093723	0.005690698	0.006800527	0.009122319	0.009523783	0.00945656	0.007456615	0.006772605	0.006569135	0.004008054	0.001523192	0.000211163	0.000809133
17:20:27.695	0.00000001	0.00000001	0.000713626	0.001054473	0.0045222	0.005043601	0.005638062	0.006815446	0.009132619	0.009500433	0.009484654	0.007453885	0.006768177	0.006620404	0.004012295	0.00152691	0.000216529	0.0008039
17:20:27.761	0.00000001	0.00000001	0.000721769	0.001015034	0.004512214	0.005228442	0.005576552	0.006835659	0.009131076	0.009496069	0.009483498	0.007454833	0.006774714	0.006635085	0.00401282	0.00152554	0.000241295	0.000807115
17:20:27.826	0.00000001	0.00000001	0.000713524	0.001027169	0.004447727	0.004991623	0.005704613	0.006872716	0.009104837	0.009465896	0.009464706	0.007444204	0.006773385	0.006631879	0.004019917	0.001520299	0.000258843	0.000789998
17:20:27.892	0.00000001	0.00000001	0.000737138	0.001078475	0.004440267	0.005047844	0.005763298	0.006850784	0.009105561	0.009443288	0.009483579	0.007441338	0.006752087	0.006654243	0.00401963	0.001529808	0.000263669	0.000792369
17:20:27.958	0.00000001	0.00000001	0.000773985	0.001077136	0.004488593	0.005158961	0.00593976	0.006854222	0.009111735	0.009457215	0.009502452	0.00744953	0.006749262	0.006693987	0.0040124	0.0015361	0.000273639	0.000795992
17:20:28.023	0.00000001	0.00000001	0.000678102	0.001070534	0.004449732	0.004998253	0.005903056	0.006828578	0.009130698	0.009487713	0.009511889	0.007448762	0.006741923	0.00670821	0.004016373	0.001532423	0.000267853	0.000805869
17:20:28.089	0.00000001	0.00000001	0.000606965	0.00108026	0.004447687	0.005055005	0.005703806	0.006820602	0.009120965	0.009467984	0.009516701	0.007458759	0.006753921	0.006706473	0.00402176	0.001533814	0.000263686	0.000812034
17:20:28.154	0.00000001	0.00000001	0.000631394	0.001009413	0.004373694	0.004937789	0.005751803	0.006866047	0.009125752	0.009476572	0.009509738	0.007470516	0.006749198	0.006741638	0.004023355	0.001532393	0.000258162	0.000808063
17:20:28.220	0.00000001	0.00000001	0.000615312	0.001079456	0.004318591	0.00502106	0.005688681	0.006868454	0.009155197	0.009474267	0.00950549	0.007462916	0.006754491	0.006728192	0.004033235	0.001533185	0.000238531	0.000801214
17:20:28.285	0.00000001	0.00000001	0.000601163	0.001160565	0.004391741	0.004924264	0.005697957	0.006904136	0.009161277	0.009476216	0.009494952	0.007463615	0.006754765	0.006702123	0.00403824	0.001536264	0.000251587	0.000791646
17:20:28.351	0.00000001	0.00000001	0.000654906	0.001087755	0.004450454	0.004973855	0.005667908	0.006924624	0.009169435	0.00945607	0.009497372	0.007453348	0.006745887	0.006686985	0.004040905	0.001544616	0.000239688	0.000795241
17:20:28.417	0.00000001	0.00000001	0.00073379	0.001090075	0.00443373	0.004968021	0.005656368	0.006942163	0.00917227	0.009450174	0.009500249	0.007442449	0.006738474	0.00665122	0.004037056	0.001549219	0.000231218	0.000809347
17:20:28.482	0.00000001	0.00000001	0.000767989	0.001090432	0.004386207	0.005083911	0.005535568	0.006881111	0.009205848	0.009473245	0.009505342	0.007444457	0.006738452	0.006648003	0.004043589	0.001552431	0.00023956	0.000803982
17:20:28.548	0.00000001	0.00000001	0.00078285	0.001101407	0.004305838	0.005060308	0.005594657	0.006859317	0.009217975	0.009472967	0.009504051	0.00744448	0.0067355	0.006667989	0.004042873	0.001555037	0.000240082	0.000810192
17:20:28.613	0.00000001	0.00000001	0.000770839	0.001137455	0.004286227	0.005039358	0.005544038	0.006799916	0.009234607	0.009445346	0.009510315	0.007446014	0.006734994	0.006704943	0.004042911	0.001562451	0.00023265	0.000818552
17:20:28.679	4.52E-05	0.00000001	0.000791298	0.001133796	0.004288633	0.004979159	0.005510763	0.006810503	0.009243679	0.009499009	0.009480474	0.00746928	0.006733497	0.006709928	0.004043694	0.001555521	0.000215899	0.000826366
17:20:28.744	1.23E-06	0.00000001	0.000792214	0.001227753	0.004281655	0.004818981	0.005568441	0.00677819	0.009241757	0.009510522	0.009483942	0.0074626	0.006732758	0.006670139	0.004051068	0.001557199	0.000192394	0.000810412
17:20:28.810	2.69E-05	0.00000001	0.000787736	0.001200628	0.004309928	0.004916308	0.005544643	0.006771659	0.009269603	0.009569802	0.009485098	0.007463954	0.006737292	0.006666485	0.004046913	0.001559341	0.000195994	0.000823013
17:20:28.876	8.45E-06	0.00000001	0.000766157	0.001127104	0.004323042	0.004926385	0.005489386	0.006812085	0.009275399	0.009575094	0.009494534	0.007459035	0.006745411	0.006663787	0.004048059	0.001553158	0.000203521	0.000829653
17:20:28.941	2.56E-05	0.00000001	0.000739082	0.001207766	0.004372411	0.004809434	0.005423843	0.006825698	0.009275619	0.009595008	0.009484828	0.007459802	0.006744778	0.006641331	0.004052166	0.001549482	0.000191759	0.000821408
17:20:29.007	5.23E-05	0.00000001	0.000726664	0.001211781	0.004492483	0.004993214	0.005450262	0.00687623	0.009268658	0.009582707	0.009476494	0.007467858	0.006762344	0.006673848	0.004054182	0.001553107	0.000195891	0.000810771
17:20:29.071	0.000147179	0.00000001	0.000701207	0.00118421	0.004438703	0.004973059	0.0056481	0.006889362	0.009268343	0.009635488	0.009470553	0.007471627	0.006757832	0.006684184	0.004051536	0.001552581	0.000191536	0.000813363
17:20:29.137	0.000153602	0.000169581	0.000685124	0.001282717	0.004419212	0.00506959	0.005608774	0.006873618	0.009282927	0.009638505	0.009469585	0.007469483	0.006760762	0.006679184	0.004054296	0.001556824	0.000209429	0.00081087
17:20:29.203	0.00018154	0.00038785	0.000691842	0.001255324	0.004436658	0.005194231	0.005615833	0.006888881	0.009242104	0.009653406	0.009487866	0.007474961	0.00675647	0.006700771	0.004050733	0.001552962	0.000215702	0.000811918
17:20:29.268	0.000151711	0.000459666	0.000658151	0.001249257	0.004443756	0.005124751	0.00561543	0.006895	0.009238401	0.009654288	0.00950518	0.007473675	0.006764061	0.006733426	0.004051851	0.001558492	0.000211528	0.000818133
17:20:29.333	3.08E-05	0.000329349	0.000594535	0.00133331	0.004484181	0.004953435	0.005558155	0.006913563	0.009249867	0.009673543	0.00951674	0.007481664	0.006775975	0.006677034	0.00405252	0.001550594	0.000221763	0.000813991
17:20:29.398	0.00000001	0.000343067	0.000544864	0.001323504	0.004501025	0.005061369	0.00554061	0.006912119	0.00926842	0.009689605	0.009514535	0.007490577	0.006777283	0.006693224	0.004061059	0.001552118	0.000246786	0.000802698
17:20:29.464	0.00000001	0.000188543	0.000569802	0.001356251	0.0045453	0.005127285	0.005562391	0.006988089	0.009268514	0.009670479	0.009519294	0.007485477	0.006788522	0.006674443	0.004054783	0.001550048	0.000264634	0.00080374
17:20:29.530	5.44E-05	0.000252692	0.000508934	0.001422904	0.004598478	0.005192523	0.005611396	0.006993589	0.009264199	0.009660777	0.009521714	0.00748884	0.00678791	0.006666302	0.004056684	0.001547787	0.000260639	0.000795092
17:20:29.595	0.00000001	0.00000001	0.000529291	0.001435575	0.004663687	0.005082202	0.005662217	0.007027072	0.009245173	0.009670897	0.009521095	0.007497888	0.00679799	0.006634424	0.004052921	0.001540425	0.000262062	0.000788238
17:20:29.661	0.00000001	0.00000001	0.000486847	0.001493751	0.004679569	0.005255374	0.005819318	0.00699524	0.009232227	0.009663609	0.00952451	0.007478256	0.006811739	0.00662235	0.004055586	0.001543401	0.000272015	0.000784708
17:20:29.726	0.00000001	0.000110272	0.00046822	0.001418532	0.004730341	0.00537975	0.005879012	0.007010296	0.009241079	0.009677628	0.009527628	0.007474307	0.006803157	0.006648968	0.004054153	0.001543535	0.000273567	0.000798065
17:20:29.791	0.00000001	0.00000001	0.000518502	0.001421655	0.004635294	0.005417408	0.005742078	0.006952613	0.009225455	0.009652653	0.009556933	0.007474149	0.006783756	0.006675997	0.004052911	0.001553235	0.000249615	0.000788094
17:20:29.856	0.00000001	0.00000001	0.000472698	0.001450208	0.004607381	0.005318755	0.005774345	0.006913769	0.009213706	0.009660081	0.009552336	0.007482701	0.006794405	0.006665158	0.004051011	0.001555871	0.000240914	0.000788683
17:20:29.921	0.00000001	0.00000001	0.000510664	0.001416301	0.004529058	0.005428281	0.005771723	0.006937763	0.009216257	0.009638541	0.009573924	0.007487237	0.006798265	0.006655234	0.004055996	0.001560886	0.000241111	0.000801295
17:20:29.985	0.00000001	0.00000001	0.000512089	0.001430667	0.004539525	0.005252192	0.005706584	0.006948626	0.009202209	0.00964829	0.009586398	0.007493059	0.006789112	0.006628479	0.00405677	0.001557961	0.000245115	0.000802139
17:20:30.052	0.00000001	0.00000001	0.000601966	0.001409788	0.004620495	0.005355087	0.005665645	0.006923325	0.009192223	0.009616398	0.009602179	0.007493533	0.006784136	0.006627564	0.004056035	0.001559001	0.00024112	0.000801135
17:20:30.117	0.00000001	0.00000001	0.000607768	0.001349916	0.004621337	0.005244236	0.005724936	0.006908887	0.009156786	0.009620066	0.00961296	0.007494819	0.006788628	0.006627579	0.004054592	0.001555696	0.000219397	0.000792433
17:20:30.183	0.00000001	0.00000001	0.000665074	0.001309317	0.004682576	0.005112434	0.005855214	0.006870936	0.009168378	0.009606418	0.00959648	0.007500574	0.006805067	0.006656987	0.004058069	0.001555953	0.000232244	0.000797325
17:20:30.248	0.00000001	4.83E-05	0.000601559	0.001337959	0.004615923	0.005303905	0.005922975	0.006879805	0.009170726	0.009563524	0.009604626	0.007497074	0.006802114	0.006648023	0.004056894	0.00155343	0.00022206	0.000802144
17:20:30.314	0.00000001	0.000139096	0.000662427	0.001284869	0.004596192	0.005524016	0.006064346	0.006832916	0.009149968	0.009550769	0.009604237	0.007507499	0.006797855	0.00668955	0.004051249	0.001558085	0.00020549	0.000804775
17:20:30.379	0.00000001	0.000280709	0.000614384	0.001257734	0.004615081	0.005453209	0.006154492	0.006882074	0.00912291	0.009549191	0.009603054	0.007506461	0.006808546	0.00668923	0.004050342	0.001557148	0.000192014	0.000798946
17:20:30.444	0.00000001	0.000378346	0.000618659	0.001213655	0.004580565	0.005416465	0.006258756	0.006893074	0.009114658	0.009551326	0.009594747	0.007511267	0.006808019	0.006672628	0.004055051	0.001560546	0.000189467	0.000811492
17:20:30.510	4.76E-06	0.000315003	0.000671282	0.001204911	0.004540019	0.005401084	0.006133317	0.006898368	0.009125746	0.009591805	0.009608296	0.007508966	0.006796358	0.006702783	0.004057143	0.00156325	0.000199754	0.000801416
17:20:30.576	0.000141078	0.000437654	0.000655098	0.001189296	0.004484796	0.005505305	0.006131301	0.006903471	0.009133274	0.009591202	0.009621443	0.007499939	0.006781407	0.006684992	0.004066522	0.001571426	0.000182927	0.000796911
17:20:30.641	0.00018716	0.000367856	0.000651637	0.001146734	0.004465787	0.005371382	0.005955848	0.00692004	0.009144361	0.00959979	0.009630825	0.007508627	0.006783347	0.006707631	0.004059053	0.001570551	0.000196317	0.000796762
17:20:30.707	0.000199202	0.000630909	0.000657745	0.001202145	0.004483473	0.005449614	0.005936487	0.006918871	0.009146219	0.009619658	0.009643891	0.007518015	0.006791318	0.006650828	0.004062625	0.001569953	0.00017846	0.000785507
17:20:30.772	0.000278681	0.000930274	0.000620084	0.001196702	0.00462484	0.005582212	0.005938907	0.006968235	0.009159701	0.009620169	0.009626846	0.007527786	0.006816117	0.006648496	0.004073227	0.00156221	0.000202343	0.000795472
17:20:30.838	0.000161148	0.00105817	0.000652554	0.001210621	0.004665987	0.005524134	0.005961696	0.006990373	0.009165717	0.009611859	0.009622303	0.007532299	0.006810212	0.006640035	0.004083629	0.001558513	0.000216454	0.000792434
17:20:30.904	0.000257023	0.00136762	0.000641357	0.001178232	0.004700516	0.005399227	0.005876592	0.006980679	0.009167733	0.009625832	0.009606333	0.007525394	0.006812405	0.006638571	0.004087172	0.001560459	0.000210222	0.00079282
17:20:30.970	0.000229085	0.001301454	0.00066202	0.001135045	0.004702923	0.005549593	0.005862676	0.006979029	0.0091809	0.009625136	0.009593913	0.007524965	0.006814366	0.006635278	0.004085988	0.001561324	0.000208558	0.000787929
17:20:31.034	0.000200665	0.001421505	0.000653876	0.001128552	0.004658528	0.005420708	0.005823351	0.006986867	0.009194004	0.009637159	0.009590122	0.007524716	0.006825563	0.006637382	0.004086829	0.00156327	0.000208378	0.000796272
17:20:31.113	0.000217363	0.001258509	0.000594739	0.001155588	0.004675371	0.005473482	0.005854005	0.007019455	0.009229031	0.009634838	0.009591924	0.007526115	0.006823965	0.006633129	0.004092044	0.001570715	0.000216368	0.000801938
17:20:31.189	0.000271795	0.000931709	0.00055321	0.001194491	0.004642405	0.005456775	0.005767892	0.00708415	0.009247868	0.009621376	0.009599156	0.007528575	0.006815994	0.006597257	0.004086733	0.001572137	0.000199276	0.000796699
17:20:31.261	0.000287369	0.000710212	0.000632807	0.00117147	0.004711224	0.005273525	0.005767287	0.007082844	0.009241284	0.009668911	0.009590392	0.007539002	0.006814518	0.006621725	0.004088825	0.00156741	0.000188826	0.000789056
17:20:31.329	0.000213992	0.00073926	0.000588733	0.001241782	0.004746717	0.00521253	0.005741473	0.007121689	0.009251584	0.0096684	0.009590753	0.007533474	0.006825757	0.006607822	0.004097268	0.001570386	0.000205946	0.000790517
17:20:31.395	0.000116369	0.000753785	0.000624257	0.001237945	0.004724459	0.005131116	0.005716062	0.007081744	0.009272689	0.009657987	0.009588414	0.007532414	0.006814708	0.006618067	0.00409851	0.001573721	0.000217922	0.000810778
17:20:31.460	3.14E-05	0.000773016	0.00062955	0.001194313	0.004747305	0.00507622	0.005573482	0.007062287	0.00927185	0.009661097	0.009590108	0.007536182	0.006808107	0.006604026	0.004102789	0.001578901	0.000203691	0.000807822
17:20:31.526	0.00000001	0.000877915	0.000597284	0.001209035	0.004781113	0.005105126	0.005603531	0.007070125	0.009258525	0.009635333	0.009589275	0.007530179	0.006826474	0.006563626	0.004109083	0.001576471	0.000200965	0.000824719
17:20:31.591	0.00000001	0.000931171	0.000606444	0.001223044	0.004798919	0.005094784	0.005659393	0.007119886	0.009275409	0.009643921	0.009586505	0.007532955	0.006844124	0.006543	0.004112904	0.001573309	0.000224342	0.00083304
17:20:31.657	0.00000001	0.000929961	0.000659237	0.001229647	0.004850413	0.005165326	0.005682787	0.007133361	0.009273614	0.009609523	0.00958336	0.00753652	0.006836343	0.006522831	0.004125411	0.001579066	0.000224548	0.000828921
17:20:31.722	0.00000001	0.000701201	0.000604069	0.00119342	0.004797956	0.005099027	0.005687627	0.007143055	0.009265424	0.00962071	0.009595404	0.00752614	0.006841973	0.006558596	0.004121027	0.001582989	0.000242859	0.000836338
17:20:31.787	0.00000001	0.000542643	0.000534244	0.001201183	0.004679087	0.005073303	0.005765069	0.00712738	0.009250115	0.009607063	0.009600861	0.007533158	0.006829216	0.00657195	0.004118276	0.001577902	0.000229563	0.00084349
17:20:31.851	0.00000001	0.000305411	0.000597148	0.001197168	0.004633609	0.005242497	0.005738448	0.00715818	0.009242146	0.009619132	0.009604625	0.007538732	0.006840096	0.006605306	0.004118094	0.001581578	0.000229537	0.000842773
17:20:31.916	0.00000001	0.000447024	0.000563558	0.001228755	0.004665131	0.005278033	0.005729978	0.007148693	0.009254904	0.009609569	0.009611615	0.007534873	0.006844567	0.006607639	0.004116318	0.001579488	0.000239216	0.000841692
17:20:31.981	0.00000001	0.000162991	0.000611194	0.001199488	0.004603651	0.005161878	0.005784025	0.00713508	0.009257613	0.00959815	0.009620272	0.007540357	0.006848932	0.006617381	0.004117349	0.001583772	0.000226511	0.000856598
17:20:32.047	0.00000001	0.00000001	0.000571498	0.001191437	0.004659116	0.005348575	0.005860256	0.007144499	0.009256605	0.009585105	0.009624224	0.007539454	0.006851315	0.006617792	0.004118505	0.001585203	0.000229315	0.00084451
17:20:32.099	0.00000001	0.00000001	0.000647124	0.001183942	0.004674395	0.005167182	0.005884054	0.007125272	0.009254683	0.009590258	0.009617691	0.007539635	0.006852892	0.006629409	0.004116528	0.001582907	0.000227369	0.000841553
17:20:32.155	0.00000001	0.000180339	0.000633282	0.001209818	0.004761742	0.005186541	0.005904221	0.007082027	0.009241642	0.009604324	0.009639978	0.007548571	0.006861327	0.006646758	0.004120673	0.001583123	0.000245417	0.000837031
17:20:32.213	0.00000001	0.000526101	0.000643256	0.001231768	0.004700503	0.00519874	0.005774345	0.007126853	0.00925462	0.009592394	0.009647559	0.007536295	0.0068608	0.006606602	0.004118467	0.001586902	0.00025458	0.000840262
17:20:32.277	0.00000001	0.000559184	0.000305124	0.001192687	0.004580913	0.004208769	0.005388551	0.007145347	0.009173068	0.009596432	0.009636805	0.007488478	0.006848717	0.00663354	0.004094178	0.001578994	0.000239826	0.000838547
17:20:32.342	0.000104951	0.00028564	0.0003551	0.001277899	0.004602088	0.00446203	0.005561785	0.007181923	0.009176848	0.009606428	0.009644494	0.007501288	0.00686158	0.006633769	0.004100071	0.001578912	0.000237032	0.000831726
17:20:32.407	0.000112176	0.00040076	0.000359376	0.001301545	0.004575137	0.004572881	0.005766682	0.007174498	0.009182917	0.009599558	0.009650785	0.007510563	0.006862655	0.006697067	0.004100472	0.001574886	0.000239561	0.000832784
17:20:32.472	0.000154565	0.000621854	0.000403042	0.001251666	0.004551797	0.004677102	0.005772329	0.007168654	0.009208557	0.009627318	0.009640623	0.007516791	0.0068519	0.006727343	0.004099125	0.001576832	0.000241009	0.000823424
17:20:32.538	0.00011603	0.0005222	0.000743515	0.001238461	0.004567678	0.005665276	0.00620249	0.007097702	0.009291432	0.009641987	0.009630676	0.007582706	0.006845427	0.006793385	0.00411456	0.001575288	0.000237332	0.000829441
17:20:32.602	0.000186518	0.000599663	0.000690417	0.001259697	0.004545781	0.005496347	0.006340836	0.007092477	0.009309985	0.00966905	0.009647747	0.007572393	0.006849834	0.006803904	0.004098653	0.001570654	0.000230757	0.000822586
17:20:32.668	0.000240307	0.000561738	0.000745076	0.001270523	0.004560941	0.00519986	0.006256717	0.007075496	0.009325294	0.009661948	0.009648097	0.007571535	0.006865206	0.006815658	0.004105836	0.001573331	0.000237537	0.000812897
17:20:32.734	9.72E-05	0.000472574	0.000789759	0.001296221	0.004679449	0.00504313	0.006282732	0.007107534	0.009335752	0.009682745	0.009652937	0.007564924	0.006865523	0.006811176	0.004103667	0.001579746	0.000252196	0.000797219
17:20:32.799	0.000119241	0.000165544	0.000754237	0.001263117	0.00466068	0.004908676	0.006301891	0.007083333	0.009365834	0.009662412	0.009674713	0.007554385	0.006867083	0.006808965	0.004100468	0.001582897	0.000239843	0.000805237
17:20:32.865	7.38E-05	0.00000001	0.000769199	0.001251607	0.004603652	0.004883217	0.006316411	0.007081958	0.009372354	0.009691797	0.009680655	0.007555717	0.006874778	0.006822274	0.00410361	0.001582506	0.000238137	0.000797103
17:20:32.931	0.000111695	2.88E-05	0.000706804	0.00132174	0.004584736	0.005064875	0.006310361	0.007101965	0.009378024	0.00970187	0.009683666	0.007553347	0.006884309	0.006833068	0.004111022	0.00158576	0.00024869	0.000794037
17:20:32.996	0.00000001	0.000203469	0.000744465	0.001411592	0.004611565	0.005013428	0.006251877	0.007085946	0.009392293	0.009709437	0.009682671	0.007550752	0.00688083	0.006840202	0.004109704	0.00157885	0.000229136	0.000803611
17:20:33.062	2.58E-05	0.000388252	0.000751692	0.001391516	0.004579201	0.005256876	0.006137732	0.007144568	0.00938467	0.009696671	0.009685682	0.007551362	0.006895401	0.006826848	0.004110248	0.001578475	0.000241635	0.000815136
17:20:33.127	2.72E-05	0.000291423	0.000787724	0.00143149	0.004501479	0.005137539	0.006275876	0.007156393	0.009398309	0.009708137	0.009676138	0.007540958	0.006895696	0.006833891	0.004109035	0.001584211	0.000233688	0.000821787
17:20:33.193	6.06E-05	0.00000001	0.000739987	0.001453529	0.004479702	0.005182622	0.006272649	0.00712243	0.009416232	0.009705352	0.00967508	0.007554069	0.006907589	0.006846239	0.004111815	0.00158452	0.000244402	0.000826568
17:20:33.258	7.01E-06	0.00000001	0.001088705	0.00146843	0.004590029	0.006078714	0.006636865	0.007132055	0.009512274	0.009711155	0.009692421	0.007610393	0.00691324	0.006819667	0.004137069	0.001595672	0.000255915	0.000828299
17:20:33.324	0.00000001	3.40E-05	0.001082904	0.001393301	0.004557064	0.005898647	0.006455362	0.007101048	0.0095124	0.009711851	0.009686506	0.007597899	0.006908854	0.006813767	0.004127364	0.00159526	0.000254355	0.000826281
17:20:33.390	0.00000001	0.00000001	0.001006361	0.001410878	0.004596526	0.005780105	0.006370258	0.007120849	0.00950944	0.009723967	0.009687582	0.007586887	0.006926757	0.006796662	0.004125578	0.001593674	0.000240947	0.000820072
17:20:33.454	0.00000001	0.00000001	0.001002097	0.001480833	0.004589428	0.005719111	0.006444472	0.007124355	0.009494509	0.0096937	0.00969347	0.007586842	0.006930279	0.006786189	0.004130545	0.001592593	0.000236893	0.000826343
17:20:33.519	0.00000001	0.00000001	0.000660912	0.001491987	0.004550928	0.004698848	0.006031452	0.007182175	0.009409079	0.009673228	0.009698497	0.007518558	0.006936268	0.006727922	0.00411255	0.001594395	0.00022952	0.000810147
17:20:33.584	0.00000001	0.00000001	0.000718624	0.001477889	0.004485117	0.004747644	0.005961675	0.007187538	0.009398243	0.009646304	0.009704735	0.007527043	0.006937027	0.006727236	0.004115167	0.001597052	0.00023	0.000825604
17:20:33.650	2.87E-05	0.00000001	0.000733485	0.001483569	0.004517361	0.005145171	0.006113353	0.007247764	0.009411977	0.009624718	0.009699062	0.007541349	0.00692313	0.006756186	0.004111404	0.001586415	0.000239979	0.000833485
17:20:33.715	9.31E-05	0.00000001	0.000735419	0.001481339	0.004480425	0.005265304	0.006196642	0.007214443	0.009439004	0.00961678	0.009702127	0.007539048	0.006932767	0.006754677	0.004116493	0.001585508	0.000204051	0.000836582
17:20:33.781	0.000159864	0.000276093	0.000679233	0.001482588	0.004510503	0.005343006	0.006382582	0.007230393	0.009425491	0.009631356	0.009697745	0.007539116	0.00693555	0.006753305	0.004112424	0.001582903	0.000218025	0.000832672
17:20:33.846	0.000200487	0.000128428	0.000708955	0.001533983	0.00449799	0.00528042	0.006501567	0.007252669	0.009442469	0.009636045	0.00970003	0.007552723	0.006922437	0.006743401	0.004111774	0.001578496	0.000210172	0.000833069
17:20:33.912	0.000225214	0.00035154	0.000728294	0.001592427	0.004573934	0.005193171	0.006503583	0.007208255	0.009434972	0.009636927	0.009722236	0.007548119	0.006905461	0.006736221	0.004105222	0.001571885	0.000211844	0.00082756
17:20:33.978	0.000234206	8.00E-05	0.000704476	0.001559324	0.00451462	0.005149679	0.006570336	0.007224343	0.009430657	0.009640641	0.00973955	0.007562358	0.006911703	0.006770293	0.004103885	0.001577559	0.00024045	0.000817396
17:20:34.043	0.000234687	0.00000001	0.000617958	0.001571548	0.004586567	0.005128994	0.006582839	0.007189829	0.009469968	0.009670025	0.009738394	0.007563983	0.006902151	0.006770156	0.004106655	0.001579726	0.000233352	0.000804332
17:20:34.107	0.000211726	0.00000001	0.000584979	0.001517833	0.004561663	0.005267573	0.006565092	0.007219186	0.009467039	0.009671511	0.009746621	0.007570099	0.006891186	0.006773678	0.004111688	0.001578428	0.000229546	0.000810619
17:20:34.172	0.000274257	0.00000001	0.000569712	0.001520064	0.004612435	0.005053826	0.006713723	0.007186186	0.009448706	0.009694536	0.009749856	0.007572626	0.006879968	0.006780812	0.004116636	0.001576163	0.000232609	0.000807172
17:20:34.238	0.000232671	0.00000001	0.000637908	0.001555933	0.004539886	0.005152744	0.006844203	0.007167004	0.009431097	0.009713383	0.009751684	0.007575713	0.006882013	0.006817126	0.004115662	0.001570201	0.000231435	0.000802948
17:20:34.302	0.000367706	0.00000001	0.000561874	0.001588799	0.004589455	0.004966577	0.006783501	0.007209974	0.009438595	0.009723178	0.009767331	0.007576683	0.006884649	0.006819916	0.004125251	0.001572445	0.000225837	0.000791048
17:20:34.368	0.000399016	0.00000001	0.000562383	0.001573005	0.004619654	0.004780411	0.006734293	0.007190517	0.009437366	0.009702242	0.009785477	0.007577901	0.006880853	0.006829475	0.004124143	0.001573372	0.000234041	0.000791489
17:20:34.433	0.000424706	0.00000001	0.000468016	0.001513937	0.004657432	0.004744079	0.006671999	0.007160816	0.009429806	0.00970628	0.00979279	0.007574968	0.00688041	0.00685655	0.004123713	0.001572538	0.000244174	0.000781243
17:20:34.499	0.000317128	7.96E-05	0.000450407	0.001500999	0.004613999	0.004701383	0.006667563	0.00715676	0.009442724	0.009720253	0.009789698	0.007581489	0.006885197	0.006879641	0.004122176	0.001575545	0.000229283	0.000785296
17:20:34.564	0.000337519	0.000208671	0.000479823	0.001481012	0.004610028	0.004781471	0.006588105	0.007185567	0.00943992	0.009758412	0.009798059	0.007583791	0.006881444	0.006866789	0.004126904	0.001574031	0.000221868	0.000777504
17:20:34.630	0.000296415	0.000131611	0.000445623	0.001508672	0.004611833	0.004657095	0.006561686	0.007163291	0.009437873	0.009800748	0.009797037	0.007601957	0.006891481	0.006874564	0.004128432	0.001580735	0.00021375	0.000765962
17:20:34.696	0.000345066	0.00000001	0.000439414	0.001479852	0.004571408	0.004667968	0.00647638	0.007176469	0.009438062	0.009818806	0.009818813	0.007595457	0.006895291	0.006862033	0.004127278	0.001580189	0.000238704	0.000776249
17:20:34.761	0.000367545	0.00000001	0.000475548	0.001532764	0.004564911	0.004681493	0.006324119	0.007180319	0.009441274	0.009828415	0.009812469	0.007607056	0.006895902	0.006848038	0.004132808	0.001578325	0.00024798	0.000779883
17:20:34.827	0.000467737	0.00000001	0.000447659	0.001544631	0.004559617	0.004858643	0.006270475	0.007223151	0.009408798	0.009793227	0.009810775	0.007613758	0.006902249	0.006873034	0.004134805	0.00158125	0.000271794	0.000779839
17:20:34.891	0.000388739	0.00000001	0.000424859	0.001471732	0.004539044	0.004860234	0.00636768	0.007214694	0.009440739	0.009798148	0.009808705	0.007602069	0.00691041	0.006878706	0.004142446	0.001586458	0.000267277	0.000780738
17:20:34.957	0.000384083	0.00000001	0.000474123	0.001472446	0.004552639	0.004815151	0.00639309	0.007230438	0.009442377	0.009833196	0.009812361	0.00760595	0.006917896	0.006843307	0.004150574	0.001591936	0.000270071	0.000788486
17:20:35.022	0.00038906	0.00000001	0.000534584	0.001491451	0.0045376	0.004757869	0.00647517	0.007256977	0.009421209	0.009796291	0.009825776	0.007616014	0.0069172	0.006837315	0.004154204	0.001598836	0.000282836	0.000795124
17:20:35.088	0.000305406	0.00000001	0.000578657	0.001495913	0.004567799	0.004840727	0.006295886	0.007191869	0.00941872	0.009811192	0.009816071	0.007619174	0.006925087	0.006838367	0.004156353	0.001599186	0.000287671	0.000781746
17:20:35.155	0.000204982	0.00000001	0.000547511	0.001504478	0.004563227	0.005058187	0.006280156	0.007194275	0.009428422	0.009779626	0.009831744	0.007616872	0.006931497	0.006815616	0.004152972	0.001606621	0.000266385	0.00077804
17:20:35.219	0.000268405	0.00000001	0.000457148	0.001463344	0.004598478	0.005022916	0.00615875	0.007203205	0.009467576	0.009783711	0.009842632	0.007622925	0.006936874	0.00682298	0.004152379	0.001609648	0.000256083	0.000784134
17:20:35.285	0.000233723	0.00000001	0.000475775	0.001438063	0.004505356	0.005196353	0.006283181	0.007154529	0.009458882	0.009767556	0.009866318	0.007641203	0.006945225	0.006838987	0.004148931	0.001609329	0.000252302	0.000795212
17:20:35.350	0.000191013	0.00000001	0.000435875	0.001482142	0.004425575	0.005419382	0.006372117	0.007164086	0.009458977	0.009788492	0.00986742	0.00766149	0.006943474	0.006852479	0.004157518	0.001615878	0.000239529	0.000804124
17:20:35.416	0.000118598	0.00000001	0.000526158	0.001476967	0.004500651	0.005376951	0.006387825	0.007199493	0.009479767	0.00982108	0.009883604	0.007666725	0.006958847	0.006846854	0.004155426	0.001622757	0.000223121	0.000807008
17:20:35.482	0.00010479	0.00000001	0.000557305	0.001508018	0.004549351	0.005263447	0.006375119	0.007197637	0.009485531	0.009832087	0.009894412	0.007675345	0.006945393	0.006859528	0.00415896	0.001626907	0.000238569	0.000814949
17:20:35.547	2.15E-05	0.00000001	0.000418571	0.001540675	0.004577865	0.005452266	0.006447115	0.007222388	0.009505439	0.009818021	0.009891992	0.007681438	0.006955262	0.006879971	0.004160632	0.001629296	0.000239341	0.000815181
17:20:35.613	2.23E-05	0.00000001	0.000427426	0.001520153	0.004533469	0.005452001	0.006427553	0.007204581	0.009500354	0.009804466	0.009901241	0.00767873	0.006953702	0.00687645	0.004169371	0.001629934	0.000241552	0.000829794
17:20:35.678	0.00000001	0.00000001	0.000424983	0.001560573	0.00458388	0.005289495	0.00645982	0.007195299	0.00949922	0.009801031	0.00989339	0.007689652	0.006954552	0.006883264	0.004169725	0.001631273	0.000243764	0.000829916
17:20:35.743	0.00000001	0.00000001	0.000423965	0.001550758	0.004632847	0.0051866	0.006525363	0.007177287	0.009501047	0.009813472	0.009899574	0.007689833	0.006954742	0.006898768	0.004171196	0.001633858	0.000239975	0.000829408
17:20:35.809	0.00000001	0.00000001	0.000374396	0.001472416	0.004679168	0.005026157	0.006584049	0.007173161	0.009512355	0.009825124	0.009896187	0.007687734	0.006958496	0.006903571	0.004168035	0.001638069	0.000246293	0.000841943
17:20:35.875	0.00000001	0.00000001	0.000393124	0.001487942	0.004648849	0.00504976	0.006538069	0.007256007	0.009500134	0.009820157	0.009887799	0.007686944	0.006959192	0.006882167	0.004169754	0.001643519	0.000261869	0.000840845
17:20:35.940	0.00000001	0.00000001	0.000315665	0.001458992	0.00464921	0.005164058	0.006367658	0.007294096	0.009524105	0.009809108	0.00988062	0.007682815	0.00696033	0.006910843	0.004165046	0.001643478	0.000246241	0.000839081
17:20:36.006	0.00000001	9.07E-05	0.000322485	0.00142455	0.004555005	0.005148147	0.006354751	0.007266182	0.009535036	0.00982206	0.009884934	0.007681732	0.006979456	0.006937415	0.004162276	0.001636239	0.000234351	0.000834924
17:20:36.070	0.00000001	0.00000001	0.000345489	0.001464167	0.004590136	0.004884809	0.006389842	0.007333284	0.009533177	0.009819646	0.009903619	0.007673225	0.006980721	0.006916102	0.004160585	0.001633242	0.000235937	0.000834654
17:20:36.135	0.00000001	0.00000001	0.000406153	0.00138645	0.004611552	0.004917958	0.006338416	0.007358791	0.009538784	0.009889139	0.009889289	0.007658872	0.00696963	0.006945164	0.004160929	0.001631491	0.000255526	0.000823465
17:20:36.200	0.00000001	0.00000001	0.000479314	0.001422409	0.004540086	0.00496808	0.006361608	0.007358249	0.009540359	0.009895313	0.009882918	0.007642016	0.006976483	0.006946582	0.004170117	0.001627784	0.000270971	0.0008127
17:20:36.266	0.00000001	0.00000001	0.000483589	0.001372084	0.004605176	0.0049344	0.006360846	0.007373786	0.009535476	0.009910678	0.00986926	0.007637628	0.006971254	0.006930986	0.004176937	0.001625848	0.000288305	0.000809381
17:20:36.333	0.00000001	0.00000001	0.000527764	0.001344334	0.004648381	0.004884809	0.006246701	0.007331985	0.009542595	0.009909378	0.009864099	0.007619214	0.006982008	0.006913698	0.004171846	0.001620298	0.000286393	0.000796334
17:20:36.399	0.00000001	0.00000001	0.000532548	0.001326132	0.00458269	0.004896212	0.006317285	0.007333773	0.009538248	0.009902508	0.009865147	0.007624472	0.006983864	0.006932907	0.004174243	0.001620916	0.00029212	0.000804545
17:20:36.464	0.00000001	0.00000001	0.000567766	0.00132979	0.004658394	0.00508503	0.006355199	0.007348142	0.009531412	0.009898232	0.009873777	0.007627315	0.006994913	0.006936454	0.004178608	0.001615623	0.000301292	0.000801258
17:20:36.530	9.70E-05	0.00000001	0.00065235	0.001330147	0.004638061	0.004933339	0.006307807	0.007278909	0.009540893	0.009922464	0.009873186	0.007634085	0.006996066	0.006906498	0.004184282	0.001613327	0.000311682	0.000807534
17:20:36.596	0.000120793	0.00000001	0.000648787	0.001354774	0.004690156	0.005030666	0.006265053	0.007249414	0.009548278	0.009937412	0.009861357	0.007615806	0.00699071	0.006865016	0.004179898	0.001615655	0.000300384	0.000806381
17:20:36.660	0.000127697	0.000256458	0.000673521	0.001324436	0.00468366	0.005014695	0.006161395	0.007312116	0.009547427	0.009950502	0.009860954	0.007617138	0.006987968	0.006849832	0.004180442	0.001617931	0.000299698	0.000797371
17:20:36.726	0.000244909	0.000117266	0.000712098	0.001342639	0.004693164	0.005078342	0.006061366	0.007296234	0.009558105	0.009978262	0.009860604	0.007626029	0.006998343	0.006843063	0.004184177	0.001616376	0.000282896	0.000805102
17:20:36.792	0.000219915	0.00010032	0.000802179	0.001367177	0.004636978	0.005127668	0.006018814	0.007263646	0.009568752	0.009973852	0.009880767	0.007624991	0.006996467	0.006826918	0.004188722	0.001614543	0.000259861	0.000797707
17:20:36.857	6.43E-05	0.000233864	0.000811238	0.001336125	0.004664169	0.005110695	0.006025267	0.007236092	0.009557695	0.009983322	0.009883697	0.007651506	0.007009203	0.006833779	0.004186344	0.001612844	0.000253852	0.000801799
17:20:36.922	0.000147339	0.000348446	0.000825997	0.00137141	0.004684742	0.004902783	0.006141026	0.007186865	0.00955527	0.009998038	0.009882945	0.007645616	0.007003953	0.006812878	0.004190862	0.001611155	0.000263993	0.000817879
17:20:36.989	0.000152156	0.000342394	0.000821292	0.001385776	0.004725047	0.004861678	0.006016999	0.007179853	0.009538323	0.010038563	0.009878336	0.007653198	0.006996024	0.006800163	0.004187977	0.001611834	0.000267036	0.000821949
17:20:37.054	0.00000001	0.000596571	0.000796049	0.001337593	0.00472228	0.005015491	0.00599421	0.007110414	0.009551459	0.010022734	0.009873819	0.007659652	0.007002329	0.006842377	0.004188388	0.001618394	0.00027548	0.000827326
17:20:37.120	6.18E-05	0.000490865	0.000861396	0.001387114	0.004668981	0.004883424	0.006064593	0.007141077	0.009569476	0.009994185	0.009887933	0.00768804	0.007028541	0.006876633	0.004188541	0.001617375	0.000268965	0.000839309
17:20:37.185	5.36E-05	0.000574785	0.000778847	0.001328848	0.004816966	0.004722981	0.005943591	0.007147677	0.009560404	0.010017163	0.009878013	0.007694065	0.00701998	0.006876592	0.00418516	0.001617663	0.00026498	0.000851413
17:20:37.251	0.000150712	0.000891497	0.000794319	0.001409599	0.004815161	0.00481739	0.006006265	0.007189684	0.009577415	0.010044923	0.009884519	0.007694097	0.007029237	0.006881348	0.004181282	0.001612947	0.000249078	0.000857435
17:20:37.316	0.000139633	0.000896339	0.000752994	0.001420664	0.004911892	0.004829737	0.00617103	0.007228254	0.009609324	0.010057689	0.009894789	0.007695519	0.007019199	0.006894474	0.004182218	0.001612494	0.000264217	0.000857115
17:20:37.381	0.000220075	0.000780144	0.000694569	0.00147313	0.004985884	0.00482735	0.006051843	0.007203022	0.009621168	0.01004808	0.009875647	0.007709329	0.007012051	0.006894383	0.004179018	0.001609384	0.000268212	0.0008479
17:20:37.445	0.000130641	0.000655879	0.000682049	0.001462868	0.004875077	0.004806135	0.005947781	0.007138121	0.009640004	0.01004989	0.009881938	0.007693759	0.007016584	0.006874051	0.004174835	0.001618765	0.000265023	0.000852102
17:20:37.510	6.97E-05	0.000700125	0.000711465	0.001506501	0.005002849	0.004901605	0.005940925	0.007149258	0.009627688	0.010045351	0.009874491	0.007699468	0.007025026	0.006901904	0.004177337	0.001626096	0.000259571	0.000845038
17:20:37.575	0.00000001	0.000481048	0.000699149	0.001456047	0.004993585	0.004801626	0.005932253	0.007212235	0.009637579	0.010028361	0.009887396	0.007714836	0.007043309	0.006913429	0.004179257	0.00162627	0.000271067	0.000846984
17:20:37.641	0.00000001	0.000167966	0.000691312	0.001460687	0.004975899	0.004897892	0.00595363	0.007146921	0.00965399	0.010044794	0.009888122	0.007708201	0.007046261	0.006936296	0.004177853	0.001626085	0.000269472	0.000852969
17:20:37.705	0.00000001	0.000281337	0.000623319	0.001461758	0.00495737	0.004984345	0.006064548	0.007235954	0.009647733	0.010046837	0.009908634	0.007710841	0.007032386	0.006955597	0.004177156	0.0016304	0.000281868	0.000845309
17:20:37.771	0.00000001	0.000161914	0.000539243	0.001481745	0.004970846	0.005085915	0.005972385	0.007250255	0.009673373	0.010059649	0.009900435	0.007716731	0.007052186	0.006973433	0.004173125	0.001624273	0.000289455	0.000859046
17:20:37.837	0.000100508	4.19E-05	0.000464634	0.001522255	0.005016778	0.004952522	0.005843922	0.007278015	0.009696274	0.010056724	0.009900408	0.007702762	0.007058702	0.006982214	0.004173096	0.001619721	0.000291889	0.000846545
17:20:37.902	7.55E-05	0.00000001	0.000518479	0.001513689	0.004995002	0.005106865	0.005828797	0.007305859	0.009695769	0.010059278	0.009918797	0.00772429	0.007058997	0.006993145	0.004179553	0.001619217	0.000295773	0.000835196
17:20:37.967	9.46E-05	0.00000001	0.000464148	0.001507621	0.005038795	0.005158313	0.005916792	0.007315278	0.009706511	0.010025715	0.009927561	0.00772086	0.007055877	0.006992368	0.004186019	0.001619454	0.000282845	0.000845811
17:20:38.033	0.000228799	0.00000001	0.000459975	0.001530196	0.005130714	0.004948279	0.006132579	0.007380799	0.009723143	0.010046697	0.00992541	0.007727066	0.007062582	0.00698441	0.004190292	0.001616982	0.00026612	0.000847493
17:20:38.098	0.000196365	0.00000001	0.000426691	0.001523058	0.005080544	0.004973207	0.006031744	0.00738623	0.009721473	0.010030404	0.009929282	0.007719551	0.007060284	0.006951206	0.004190626	0.001615427	0.000268538	0.000849114
17:20:38.164	0.000148999	2.74E-05	0.000461502	0.001544472	0.005103042	0.004988853	0.006099706	0.007391593	0.009736247	0.010031657	0.009955199	0.007728803	0.007079009	0.00694649	0.004196214	0.001616931	0.000254357	0.000846892
17:20:38.230	0.00000001	0.00000001	0.000180369	0.00150084	0.005080303	0.003964142	0.005407576	0.007399155	0.009641748	0.010030311	0.009950736	0.007680332	0.007075909	0.006982667	0.004170731	0.001623151	0.000258163	0.00084167
17:20:38.295	7.21E-05	0.00000001	0.000280221	0.001492809	0.0050098	0.004245896	0.005537652	0.007378392	0.009628014	0.010060067	0.009948477	0.00770003	0.007079787	0.006969586	0.004177636	0.001629792	0.000245604	0.000848811
17:20:38.360	7.35E-05	0.00000001	0.00028358	0.001506372	0.004946516	0.004404217	0.005537047	0.007389912	0.009651104	0.010055842	0.009988401	0.007700662	0.007089972	0.006950698	0.004180798	0.001632378	0.000245819	0.000854121
17:20:38.426	0.000207123	2.77E-06	0.000282256	0.001479247	0.005003664	0.004510295	0.005651797	0.007417894	0.009651135	0.010054125	0.009994127	0.007721806	0.007082022	0.006969998	0.004181906	0.001627559	0.000226779	0.000854778
17:20:38.492	0.000203698	0.00000001	0.000262612	0.001456048	0.004913671	0.004519047	0.005629009	0.007467395	0.009662916	0.010076675	0.010012919	0.007717293	0.007081643	0.006959006	0.004178314	0.001625211	0.000218447	0.000864439
17:20:38.557	0.00017849	0.00000001	0.000278287	0.001490975	0.004920528	0.004616638	0.005580608	0.007440788	0.00967791	0.010093387	0.010033728	0.007726703	0.007066861	0.006960424	0.004187006	0.001624429	0.000214966	0.000859559
17:20:38.622	0.000168695	0.00000001	0.000275132	0.001506233	0.004974428	0.004676837	0.005616303	0.007496477	0.009696369	0.010055368	0.010048461	0.007743853	0.007074979	0.006965821	0.004193148	0.001627734	0.000209128	0.000863743
17:20:38.689	0.000109768	0.00000001	0.000292333	0.001487406	0.00490946	0.004774694	0.005589885	0.007440101	0.009718282	0.010040606	0.010045503	0.007742995	0.007077636	0.006968108	0.004193282	0.001627755	0.000208357	0.000866704
17:20:38.753	9.87E-05	0.00000001	0.000360835	0.001479465	0.004937613	0.004698053	0.005725407	0.007449451	0.009704516	0.010050401	0.010070425	0.007757911	0.007061715	0.006959372	0.004203807	0.00163865	0.000207885	0.000849179
17:20:38.819	1.58E-05	0.00000001	0.000424067	0.001474379	0.004901666	0.004912861	0.005736902	0.007426144	0.009699507	0.010066741	0.010092255	0.007773933	0.007059586	0.006942679	0.004204008	0.001645034	0.000194709	0.000865684
17:20:38.884	1.07E-06	0.00000001	0.000408697	0.001475539	0.004913938	0.004995071	0.005723592	0.00743742	0.009699256	0.010040513	0.010080848	0.007770345	0.00706975	0.006928913	0.004201563	0.001645044	0.000185982	0.000861113
17:20:38.950	4.06E-05	0.000211539	0.000463356	0.001483212	0.004905275	0.005092397	0.005817502	0.007461345	0.009715604	0.010083453	0.010073858	0.007778762	0.007086809	0.006926534	0.004202002	0.001648	0.000181413	0.000847735
17:20:39.016	0.00000001	0.000401971	0.000506514	0.001471791	0.004794949	0.005190784	0.005757203	0.007454745	0.009700452	0.010105549	0.010073938	0.007789639	0.007088201	0.006904444	0.004202849	0.001652654	0.000184388	0.000850266
17:20:39.081	0.00000001	0.000537577	0.000546821	0.00149392	0.004931744	0.005233746	0.005796125	0.007446907	0.009705272	0.010103321	0.010089343	0.007799207	0.007102561	0.006923928	0.00421262	0.001662766	0.000171178	0.000843075
17:20:39.147	0.00000001	0.000531928	0.000573794	0.001505966	0.004860639	0.005362895	0.005864491	0.007445601	0.009693302	0.010079089	0.010098053	0.007806383	0.007085249	0.006910675	0.004204396	0.001662004	0.000182957	0.000837726
17:20:39.212	7.50E-05	0.00079821	0.000862866	0.001588154	0.004896132	0.006252623	0.006480189	0.007459832	0.009788273	0.010065766	0.010112463	0.00785429	0.007088243	0.006901985	0.004230252	0.001659646	0.000179765	0.000844564
17:20:39.277	1.68E-05	0.000683628	0.00082602	0.001593062	0.004881694	0.006001219	0.006331962	0.007482452	0.009801692	0.010067763	0.010121335	0.007851404	0.0070893	0.006909989	0.00422943	0.001659543	0.000207737	0.00085186
17:20:39.344	0.00000001	0.000955154	0.000857268	0.001527301	0.004784361	0.006034898	0.006398513	0.007507714	0.009793092	0.010087259	0.010107758	0.007840392	0.007084217	0.006893524	0.004230013	0.001661911	0.000206614	0.000849445
17:20:39.410	0.00000001	0.000890601	0.000825511	0.001591188	0.004762705	0.005877373	0.006415454	0.007526552	0.009792053	0.010110052	0.010108377	0.007829583	0.007088456	0.006882136	0.004232363	0.001655238	0.000231458	0.000836678
17:20:39.475	0.00000001	0.001015269	0.000857472	0.001618135	0.004758373	0.005704466	0.006511448	0.007489151	0.009811929	0.01012124	0.01010913	0.007835021	0.007081413	0.006899256	0.004238218	0.001657493	0.000239173	0.000832239
17:20:39.541	0.00000001	0.001243221	0.000870195	0.001634464	0.004703872	0.005813991	0.006569731	0.007500977	0.009797659	0.010116737	0.010099155	0.007830215	0.007087106	0.006899988	0.004228838	0.001654795	0.000238736	0.000833497
17:20:39.606	0.00000001	0.001341665	0.000816147	0.001654183	0.004660198	0.005943937	0.006555009	0.007456838	0.009787989	0.010112776	0.010097515	0.007830395	0.007085925	0.006856585	0.00422837	0.001653673	0.000252597	0.000839866
17:20:39.671	0.00000001	0.00143688	0.001120893	0.001689785	0.004740326	0.006980847	0.006976499	0.007477601	0.009841664	0.010081766	0.010095929	0.007857745	0.007090586	0.006869574	0.004243643	0.001652385	0.000254672	0.000836717
17:20:39.737	0.00000001	0.001309388	0.001023179	0.001686484	0.004689434	0.006849841	0.006920345	0.007437381	0.009849696	0.01008483	0.010086117	0.007831997	0.007096912	0.006875611	0.004238886	0.001645229	0.000255101	0.000835542
17:20:39.802	0.000104986	0.00134812	0.000983358	0.001693443	0.004631804	0.006674813	0.006833022	0.007438069	0.009852951	0.010073271	0.010067002	0.007827078	0.00708388	0.006891328	0.004243662	0.001642191	0.000273034	0.000832813
17:20:39.868	8.44E-05	0.001554286	0.000985292	0.001669619	0.00461484	0.006381243	0.006735817	0.007424937	0.00987478	0.010080884	0.010075694	0.007819721	0.007075466	0.006896451	0.004247625	0.001641367	0.000273403	0.000836661
17:20:39.934	8.48E-05	0.001442529	0.000930022	0.00166721	0.004653942	0.006272248	0.006614211	0.007418895	0.009867504	0.010050525	0.01009688	0.007823941	0.007064164	0.006882639	0.004249488	0.001642737	0.000277912	0.000842071
17:20:39.999	0.000112372	0.001524027	0.000923813	0.001672296	0.004733107	0.006257927	0.0064438	0.007409132	0.009872985	0.010039523	0.010108359	0.007810064	0.007066547	0.006886161	0.004248848	0.001643396	0.000298083	0.000827595
17:20:40.065	0.000143807	0.00133113	0.000843809	0.001640888	0.004660318	0.006340933	0.006469613	0.007390844	0.009867157	0.010067051	0.010093761	0.007796614	0.007049592	0.006905278	0.004247196	0.001636795	0.000302978	0.000830507
17:20:40.131	0.000244802	0.001166116	0.000792102	0.001632768	0.004680772	0.006218944	0.006447833	0.007423364	0.009869772	0.010080838	0.010089056	0.007792484	0.007063887	0.006952009	0.004253306	0.001636176	0.000297835	0.0008344
17:20:40.196	0.0003238	0.000930094	0.000834241	0.001570031	0.004681493	0.006167761	0.006454085	0.007358256	0.009879505	0.010115793	0.010081717	0.007799976	0.007063043	0.00691382	0.004258627	0.001636135	0.000298962	0.0008366
17:20:40.261	0.00023838	0.00107897	0.000793832	0.001566373	0.004700503	0.006131695	0.006390155	0.007388507	0.009871	0.010078377	0.010091395	0.007800676	0.007083456	0.006929828	0.004255828	0.001632881	0.000288135	0.000824165
17:20:40.326	0.000257005	0.000611364	0.000758614	0.001658367	0.004762103	0.005902036	0.006373215	0.007390707	0.009849014	0.010078517	0.010115511	0.007808574	0.007095412	0.006946658	0.004258913	0.001625219	0.000294128	0.000832514
17:20:40.392	0.000334236	0.000475713	0.000757495	0.001642484	0.004788665	0.005950125	0.006280044	0.007376544	0.009838556	0.010058323	0.010122931	0.00781575	0.007119367	0.006971446	0.004266019	0.001635064	0.000279803	0.000837664
17:20:40.457	0.000358803	0.00033289	0.000698154	0.001599209	0.004811645	0.006108711	0.006283271	0.00740872	0.009798488	0.010038409	0.010134249	0.007807288	0.007139779	0.006966324	0.004262084	0.001631583	0.000279031	0.000835436
17:20:40.523	0.000399426	2.71E-05	0.000718386	0.001650961	0.004860492	0.005832378	0.006212686	0.00739325	0.009795181	0.010042123	0.010135297	0.007808145	0.007145894	0.006985817	0.004264768	0.001629009	0.000275482	0.000839203
17:20:40.588	0.000374859	0.00000001	0.000773656	0.001589929	0.004860251	0.005549946	0.006190099	0.007427007	0.009772973	0.010090462	0.01014019	0.007809386	0.007140644	0.007013304	0.004266373	0.001628834	0.000264347	0.000826012
17:20:40.654	0.000407936	0.00000001	0.000499954	0.00157253	0.004865064	0.004252084	0.005703873	0.007388988	0.009711046	0.010114787	0.010148525	0.007783548	0.00715028	0.006988059	0.004254462	0.001631799	0.000251154	0.000828692
17:20:40.720	0.000390934	0.00000001	0.000618637	0.001576456	0.004910181	0.004374339	0.00578342	0.007404457	0.009730418	0.010110563	0.010154493	0.007796411	0.007149416	0.006970588	0.004253708	0.001637298	0.00023562	0.000833098
17:20:40.785	0.00025911	0.00000001	0.00067299	0.001537017	0.005004266	0.004407223	0.005960083	0.007402326	0.009744929	0.010131035	0.010183931	0.007794132	0.007165842	0.006977372	0.004250775	0.001633602	0.000222924	0.000831775
17:20:40.851	0.00030439	0.00000001	0.000618637	0.001529165	0.005082108	0.004586494	0.006090362	0.007374206	0.00973003	0.010146447	0.010189711	0.007805686	0.007161329	0.006971335	0.004253612	0.001626249	0.000233271	0.000831813
17:20:40.915	0.000166465	0.00000001	0.000661488	0.001544076	0.004960352	0.004610627	0.006183332	0.007388636	0.009756363	0.010203777	0.010193609	0.00780467	0.007169891	0.007002435	0.004260461	0.001626115	0.000240995	0.00082856
17:20:40.980	0.000174172	0.00000001	0.000591664	0.001534528	0.004922934	0.00462813	0.006325308	0.007402593	0.009790351	0.010207073	0.010202024	0.00783035	0.007177503	0.007025485	0.00426814	0.001631913	0.000227631	0.000844955
17:20:41.045	0.000215116	0.00000001	0.000617212	0.001536759	0.005005349	0.004557323	0.006290822	0.007403555	0.009794572	0.0102132	0.010204524	0.007836849	0.007174889	0.00701396	0.004265618	0.001637875	0.00023808	0.000850629
17:20:41.110	8.76E-05	0.00000001	0.000648155	0.001595203	0.004970217	0.004598163	0.006301107	0.007366842	0.009803235	0.010221324	0.010203932	0.007839105	0.007168775	0.006996306	0.004262593	0.001643746	0.000245178	0.000856877
17:20:41.175	4.17E-05	0.00000001	0.000582197	0.001603145	0.004945433	0.00468276	0.006411017	0.007390286	0.009804022	0.010190315	0.010213422	0.007846101	0.007170842	0.007026085	0.004259737	0.001642901	0.000236202	0.000851854
17:20:41.239	0.000120543	0.00000001	0.000614565	0.001640085	0.004930995	0.004881921	0.00637149	0.007342848	0.009815866	0.010221463	0.010200087	0.007846326	0.007155006	0.007033402	0.004268868	0.001644703	0.000217351	0.000854424
17:20:41.305	0.000151051	0.00000001	0.000656195	0.001642316	0.005031817	0.005067557	0.006239194	0.00733226	0.009825441	0.010224341	0.010168525	0.007858895	0.007139528	0.007069213	0.004268897	0.001649224	0.000227038	0.000846874
17:20:41.370	0.00000001	0.00000001	0.000653753	0.001603948	0.005083939	0.005175403	0.006306955	0.007336866	0.009844499	0.010233719	0.010168767	0.007859708	0.007135269	0.007077034	0.004263366	0.001645939	0.000232156	0.000847729
17:20:41.435	2.53E-06	0.00000001	0.000677876	0.001632501	0.005157811	0.005065612	0.006339424	0.007342848	0.009864564	0.01023098	0.010163148	0.007880942	0.007121815	0.007126839	0.004268123	0.001645712	0.000232293	0.000844187
17:20:41.501	0.00000001	0.00000001	0.000672707	0.001524624	0.005146622	0.005010982	0.006387085	0.00736811	0.009887811	0.010234183	0.010163282	0.007891548	0.007134763	0.007125823	0.004270941	0.001656072	0.000225761	0.000841039
17:20:41.567	1.68E-05	0.00000001	0.000670061	0.001552731	0.005165391	0.004917899	0.00643468	0.007370791	0.009900946	0.010250848	0.010158685	0.007898566	0.007146255	0.007151663	0.004271686	0.001656082	0.000220951	0.000844121
17:20:41.632	0.00000001	0.00000001	0.000614486	0.001555408	0.005204011	0.004912595	0.006471787	0.007408674	0.009890898	0.010259157	0.010153281	0.007905381	0.00714324	0.007174073	0.004277111	0.00165219	0.000221354	0.000835414
17:20:41.698	0.00000001	0.00000001	0.000596979	0.001567721	0.005261641	0.004946009	0.006413907	0.007412799	0.009872156	0.010272052	0.010154447	0.007920319	0.007149398	0.007208238	0.004287589	0.001654229	0.00022426	0.000835954
17:20:41.764	1.18E-05	0.000265782	0.000564713	0.001556657	0.005311932	0.005003822	0.006355826	0.007381448	0.009872534	0.010292106	0.010141246	0.007928601	0.007140605	0.007233895	0.004293129	0.001663362	0.000223806	0.00083403
17:20:41.829	1.50E-05	0.000186705	0.00055148	0.00160252	0.005235774	0.005066938	0.006382043	0.007444081	0.009856438	0.010294288	0.010150441	0.007912105	0.007149187	0.007239612	0.004290454	0.001673536	0.000224578	0.000829552
17:20:41.895	8.36E-05	0.000170163	0.000575502	0.001612236	0.005327692	0.004893766	0.006429032	0.007473782	0.009842974	0.01026806	0.010158641	0.007919213	0.007152121	0.007246518	0.004288219	0.001675764	0.000227655	0.000835485
17:20:41.960	3.45E-05	0.00011731	0.00062782	0.001611165	0.005337678	0.005128139	0.006314887	0.007483888	0.009834784	0.010273816	0.010158049	0.007903146	0.007139595	0.007251961	0.004282259	0.001671367	0.000214933	0.00083993
17:20:42.025	6.37E-05	0.00000001	0.000592297	0.001629814	0.005278966	0.005048315	0.006337071	0.007501901	0.009832548	0.010226977	0.010162243	0.007918807	0.007140207	0.007235404	0.0042831	0.001664838	0.000202486	0.000839461
17:20:42.091	0.000147821	0.00000001	0.000621	0.001627315	0.005361019	0.005058923	0.006379018	0.007533183	0.009842659	0.010197778	0.010160173	0.007935799	0.007144403	0.007215693	0.004289232	0.001666723	0.000194557	0.00083077
17:20:42.156	0.0001475	0.00000001	0.000628227	0.001650336	0.005383036	0.005111432	0.006381035	0.007569965	0.009843383	0.010194204	0.010170094	0.007934286	0.00715056	0.007208278	0.004297265	0.001667979	0.00019579	0.000832463
17:20:42.222	0.000173351	0.00000001	0.000576316	0.001703427	0.005339363	0.005088625	0.006363288	0.007607435	0.0098534	0.010155395	0.010177057	0.007933158	0.007155263	0.007181843	0.004294963	0.0016656	0.000210898	0.000828443
17:20:42.287	0.000140435	0.00000001	0.000580286	0.001654619	0.005251414	0.004939586	0.006448393	0.007619329	0.00987797	0.010174799	0.010197382	0.007938529	0.007172976	0.007142283	0.004291829	0.001670842	0.000203611	0.000830395
17:20:42.353	0.000246479	0.000130222	0.000616635	0.001630438	0.005245158	0.005026039	0.006459283	0.007668761	0.0098889	0.01018854	0.010197543	0.007958382	0.007167134	0.007110862	0.004298314	0.001674704	0.000212269	0.000839439
17:20:42.417	0.000226248	0.000292411	0.000602487	0.001640253	0.005121717	0.005162614	0.006495583	0.007687393	0.009898885	0.010214814	0.010211201	0.007968063	0.007179997	0.007107112	0.004302794	0.001677927	0.000222128	0.000857545
17:20:42.483	0.000190282	0.000342843	0.000609612	0.001685313	0.005108483	0.00532014	0.006422512	0.007707094	0.009898192	0.010210033	0.010214239	0.007968604	0.007174768	0.00713248	0.004304293	0.001674508	0.000235647	0.000856056
17:20:42.547	0.000217096	0.000175409	0.000639638	0.001701018	0.005179588	0.005512406	0.006459014	0.007667768	0.009896963	0.010208037	0.010215583	0.007969913	0.00716608	0.007124248	0.004306939	0.001676434	0.00024968	0.000855047
17:20:42.613	0.000195259	0.00000001	0.00075486	0.0016834	0.005137478	0.005591169	0.006405774	0.007671343	0.009902916	0.010213097	0.010210825	0.007950574	0.007169665	0.007127312	0.004304847	0.00167734	0.000254163	0.000854925
17:20:42.678	0.000165555	7.60E-05	0.000732467	0.001696695	0.005068419	0.005586661	0.006514272	0.007722632	0.009924682	0.01020814	0.010200304	0.007954862	0.007173629	0.007113408	0.004301084	0.001681129	0.000268848	0.000867874
17:20:42.744	8.64E-05	0.00000001	0.000812573	0.001759511	0.00498023	0.005615036	0.00660583	0.007802521	0.009928966	0.010192728	0.010205009	0.007963595	0.007194041	0.00706932	0.004302488	0.00167458	0.00027466	0.000869012
17:20:42.810	3.73E-05	0.00000001	0.000846569	0.001767096	0.004990029	0.005464141	0.006513062	0.007794409	0.009966009	0.010181355	0.010204552	0.007987334	0.007205744	0.007079656	0.004309202	0.001673633	0.00027316	0.000859587
17:20:42.875	5.96E-05	0.00000001	0.000855527	0.001712756	0.004951168	0.005656937	0.006452965	0.007773371	0.009967126	0.010184836	0.010211299	0.007993878	0.007215801	0.007093468	0.004307636	0.001674515	0.00025713	0.000859554
17:20:42.941	0.000120597	0.00000001	0.000889421	0.001699104	0.004847458	0.005418321	0.006561462	0.007805409	0.00997163	0.010157634	0.010217671	0.00799108	0.00722103	0.007092096	0.004310988	0.001669315	0.000264039	0.000854547
17:20:43.006	8.72E-05	0.00000001	0.000927286	0.00169723	0.004844811	0.005510874	0.006599578	0.00779489	0.010001239	0.010225037	0.010237055	0.007993834	0.007228495	0.007096212	0.00431499	0.00167748	0.000282479	0.000851558
17:20:43.072	0.000082222	0.00000001	0.00092464	0.001679474	0.004733642	0.005462343	0.006453569	0.007830901	0.009996105	0.010270391	0.010237727	0.007986026	0.007231405	0.007105633	0.004315201	0.001674865	0.000282058	0.000852424
17:20:43.138	4.32E-05	0.00000001	0.000905911	0.001719805	0.004764924	0.005357326	0.006389237	0.007831451	0.010018722	0.01027183	0.010232646	0.007988125	0.007230435	0.007118414	0.004313567	0.001674401	0.00029712	0.000854205
17:20:43.203	0.00000001	0.00000001	0.000997823	0.001621655	0.004823155	0.005212265	0.006487248	0.007864658	0.010019668	0.01032735	0.010233775	0.008000604	0.007240767	0.0071518	0.004312956	0.001675617	0.000293226	0.000869111
17:20:43.269	1.49E-05	0.00000001	0.001034161	0.001631916	0.004755299	0.005387558	0.006546651	0.007864108	0.010027984	0.010304046	0.01023805	0.008003064	0.007241927	0.007176589	0.004323234	0.00166569	0.000297178	0.00086824
17:20:43.335	0.00000001	0.00000001	0.001005547	0.001722928	0.004728469	0.005407183	0.006646075	0.007873114	0.010018187	0.010305857	0.010257514	0.007992192	0.007251016	0.007167533	0.004317465	0.001667842	0.000283977	0.000854519
17:20:43.402	0.00000001	0.00000001	0.001027228	0.00170419	0.004734725	0.005324177	0.006567424	0.007853039	0.010038819	0.010291234	0.010258374	0.007988243	0.007248654	0.007132409	0.004317188	0.001669077	0.000270243	0.000844036
17:20:43.467	7.27E-05	0.00000001	0.001026821	0.001731673	0.0047482	0.005338232	0.006794302	0.007891952	0.010037528	0.010295644	0.010259745	0.007985286	0.007253799	0.007122499	0.004316568	0.001673598	0.00027002	0.000853488
17:20:43.533	8.89E-05	0.00000001	0.001007379	0.00175621	0.004708497	0.005363485	0.006749128	0.007944547	0.010061279	0.010296712	0.010254369	0.007980863	0.007275624	0.007101415	0.004320627	0.001672465	0.000266669	0.000857414
17:20:43.597	0.000100294	8.23E-05	0.000958319	0.0018221	0.004750125	0.005489717	0.006853593	0.007971292	0.010090448	0.010300379	0.01026894	0.008005663	0.00727632	0.007094464	0.004321515	0.001668269	0.000267577	0.000855352
17:20:43.663	7.06E-05	0.00000001	0.000899894	0.001756517	0.004792114	0.00558174	0.006755985	0.007971429	0.010117884	0.010299265	0.010283081	0.007998081	0.007284544	0.007108138	0.004324352	0.001667198	0.000248503	0.000851266
17:20:43.728	4.44E-05	0.00000001	0.000895618	0.001711725	0.004850345	0.005634514	0.006686005	0.007933684	0.010132436	0.010306192	0.010290152	0.008011395	0.007281828	0.007142531	0.004324782	0.001670524	0.000239305	0.000854269
17:20:43.793	5.45E-05	0.00000001	0.000868543	0.001682637	0.004851254	0.005615154	0.006779983	0.007939253	0.010142233	0.010311066	0.010310826	0.008019316	0.007281238	0.007160231	0.0043261	0.001672089	0.000224149	0.000874011
17:20:43.858	9.11E-05	0.00000001	0.000842181	0.001751788	0.004916825	0.005529231	0.006711819	0.007964141	0.010150202	0.010309627	0.010323301	0.008013855	0.007273499	0.007139645	0.004328564	0.001669319	0.000227818	0.000880419
17:20:43.923	2.85E-05	0.000132059	0.000835565	0.001780252	0.005063486	0.005557077	0.006750136	0.007950529	0.010149887	0.010359716	0.010303998	0.008033059	0.007283262	0.007162055	0.004332996	0.001672501	0.000217085	0.000874281
17:20:43.989	0.000103185	0.000349522	0.000887272	0.001755447	0.005141568	0.005543552	0.006759614	0.007948466	0.010151157	0.010328289	0.010278457	0.008033419	0.00728381	0.007183002	0.004334047	0.001667877	0.000203729	0.000878506
17:20:44.054	4.09E-05	0.000427389	0.000811645	0.001736887	0.005224223	0.005692061	0.006970763	0.007936656	0.010151629	0.0103275	0.010288351	0.008036511	0.007291381	0.007190457	0.004337294	0.001667743	0.00019622	0.000882435
17:20:44.120	4.89E-05	0.000690039	0.000822638	0.001728767	0.005242992	0.005827575	0.006991131	0.0079172	0.010170371	0.010358509	0.010295099	0.008044206	0.007298571	0.007197937	0.00433802	0.001678175	0.000175397	0.000883841
17:20:44.185	0.00012966	0.000527849	0.000779051	0.00174693	0.005266934	0.005957255	0.007013315	0.007905855	0.010180199	0.010363012	0.010307708	0.00805858	0.007295577	0.007204385	0.004339806	0.001679967	0.000181508	0.000874671
17:20:44.251	3.24E-05	0.000899343	0.000785159	0.001678136	0.005483858	0.005867885	0.007035991	0.007951919	0.01017705	0.010378331	0.010308245	0.00806113	0.00729001	0.007223777	0.004341506	0.00168873	0.000174925	0.000878718
17:20:44.317	8.07E-05	0.000871908	0.00078638	0.001641731	0.005434169	0.005703995	0.006906519	0.007973645	0.010202848	0.010388776	0.010294185	0.008057767	0.007286847	0.007282821	0.004352519	0.001683375	0.000178208	0.000877218
17:20:44.381	3.94E-06	0.000573754	0.0007704	0.001626562	0.005517665	0.005682779	0.006914586	0.00799317	0.010188074	0.010407251	0.010286092	0.008050637	0.007286615	0.007284102	0.004353216	0.001689461	0.000198439	0.000869305
17:20:44.447	0.00000001	0.000613696	0.000778848	0.001575702	0.005562061	0.005739266	0.006820809	0.00794965	0.010171537	0.010402841	0.01031416	0.008052442	0.007280669	0.007275641	0.004353368	0.001687607	0.000188564	0.000854708
17:20:44.512	0.00000001	0.000191681	0.000800529	0.001602381	0.005599598	0.005758566	0.006810928	0.007960307	0.010177364	0.010398385	0.010331407	0.008064108	0.007270041	0.007298046	0.004349261	0.001696082	0.000183514	0.000855171
17:20:44.578	0.00000001	0.000140845	0.000758695	0.001550005	0.005567595	0.005663096	0.006813751	0.007924281	0.010186215	0.01040507	0.010337933	0.00806219	0.007268269	0.007282771	0.004355469	0.001704254	0.000201131	0.000862296
17:20:44.643	0.00000001	0.00036315	0.000774573	0.001584625	0.005517185	0.005589637	0.006851262	0.00790558	0.010168954	0.01042387	0.010350514	0.008064018	0.00727101	0.007274675	0.004357418	0.001703719	0.000220308	0.000853754
17:20:44.708	0.00000001	0.000351853	0.000715741	0.001592209	0.005510447	0.005544554	0.006924871	0.00790668	0.010179065	0.010413369	0.0103767	0.008059392	0.007276994	0.007299967	0.004361057	0.001706139	0.000230758	0.000853158
17:20:44.774	0.00000001	0.000417213	0.000771316	0.001617104	0.005601885	0.005653814	0.006936165	0.007903518	0.010192672	0.010411837	0.010369226	0.008049193	0.007277121	0.007255421	0.004366033	0.001708631	0.000237573	0.000844754
17:20:44.840	0.00000001	0.000292948	0.000752079	0.001586677	0.005613314	0.005856688	0.007020664	0.007913418	0.010194783	0.010425717	0.010344923	0.008061265	0.007279926	0.007279163	0.004371764	0.001707158	0.000243831	0.000832837
17:20:44.906	0.00000001	0.000410354	0.000655891	0.001604701	0.005500582	0.005763604	0.006925073	0.0079304	0.010206312	0.010426645	0.010366296	0.008058648	0.007284017	0.007250167	0.004372805	0.001708878	0.000238884	0.000839984
17:20:44.971	0.00000001	0.000477731	0.000554919	0.001671979	0.005411911	0.005792246	0.006888773	0.007942362	0.01019682	0.010447024	0.010389739	0.00806702	0.00729669	0.00726032	0.00437269	0.001707343	0.000249274	0.000846778
17:20:45.037	0.00000001	0.000403091	0.000644593	0.001673228	0.005390736	0.005741063	0.006807836	0.007948	0.010196978	0.010436394	0.010396675	0.008069028	0.007292978	0.007280946	0.004374419	0.00171067	0.000269737	0.000845236
17:20:45.103	0.00000001	0.000376463	0.000641946	0.00162567	0.005308563	0.005742861	0.006703573	0.007987738	0.010181322	0.010429756	0.010383072	0.008074015	0.007295045	0.00729334	0.004376349	0.001701165	0.000296063	0.000838828
17:20:45.168	0.00000001	0.000299807	0.000662733	0.001656404	0.005270303	0.005711302	0.006528725	0.007994751	0.010206931	0.010435837	0.010388206	0.008064154	0.007295172	0.007277948	0.004377657	0.001705922	0.000278515	0.000843212
17:20:45.233	0.00000001	0.000145776	0.000570821	0.00172502	0.005147825	0.005664098	0.006550909	0.007967663	0.010205324	0.01046109	0.010407966	0.00806887	0.007306369	0.007253709	0.004380914	0.001708826	0.000273198	0.000835332
17:20:45.298	0.00000001	0.000269637	0.000645022	0.001757231	0.005179975	0.005604694	0.006510777	0.007970344	0.010190267	0.010496324	0.010412295	0.008078483	0.007313138	0.007203674	0.004375365	0.001702905	0.000264317	0.000844149
17:20:45.364	0.00000001	0.000254306	0.000647872	0.001791852	0.005137265	0.005654286	0.006501298	0.007976395	0.010212979	0.010497484	0.010409203	0.008085659	0.007322859	0.007220779	0.004375336	0.001694049	0.000254176	0.00085348
17:20:45.429	0.00000001	0.000227274	0.000573263	0.001802559	0.00511633	0.005564385	0.006484156	0.007983545	0.010255283	0.010499527	0.0103981	0.00809525	0.007332475	0.007228783	0.00438187	0.001694451	0.000270489	0.000868832
17:20:45.494	0.00000001	0.000523008	0.000555552	0.00180015	0.00502766	0.005520627	0.006506541	0.007981207	0.01027853	0.010518745	0.010394805	0.008102336	0.007348037	0.007225998	0.004384869	0.001690435	0.000277639	0.000865866
17:20:45.560	0.00000001	0.000406498	0.000604511	0.001806663	0.004978693	0.005544495	0.006503314	0.008010702	0.010278088	0.010523201	0.010399007	0.008099154	0.007352592	0.007245801	0.00438039	0.001689559	0.000257956	0.000863748
17:20:45.625	0.00000001	0.000111572	0.000655098	0.001820583	0.004958841	0.005686374	0.00653054	0.008027615	0.01027519	0.010520602	0.010404088	0.008101997	0.007348421	0.007266337	0.004380046	0.001683123	0.000249324	0.000871562
17:20:45.691	0.00000001	0.000168459	0.000681767	0.001844853	0.004953066	0.005786883	0.006594873	0.008040677	0.01026952	0.010548687	0.010394947	0.008098161	0.007342032	0.007267343	0.004385041	0.001680601	0.000238865	0.000863312
17:20:45.756	0.00000001	0.000220909	0.000687161	0.001843693	0.004872577	0.005808894	0.006550303	0.00809946	0.010267032	0.01058718	0.010390968	0.008103938	0.007341146	0.007310288	0.004381612	0.001674154	0.000245612	0.000861217
17:20:45.821	0.00000001	0.000249151	0.000655404	0.001846499	0.004850319	0.005764606	0.006465602	0.008080072	0.010287254	0.010583281	0.010410406	0.008108925	0.007350277	0.007299718	0.004383408	0.001675277	0.000247764	0.000860566
17:20:45.886	0.00000001	0.00000001	0.000726858	0.001828475	0.004964737	0.005931414	0.006529733	0.008081791	0.010295664	0.010560256	0.010409975	0.008134785	0.00736295	0.007307219	0.004386111	0.00166743	0.000280502	0.000851997
17:20:45.951	0.00000001	0.00000001	0.000812765	0.001784128	0.004971956	0.005989756	0.006589225	0.008102898	0.010312202	0.010562902	0.010411749	0.008144195	0.007374591	0.007290251	0.004387468	0.001668501	0.000271595	0.000846399
17:20:46.016	4.29E-05	0.00000001	0.000790474	0.001828564	0.005009253	0.006058707	0.006530002	0.00808406	0.01035397	0.010582491	0.010415379	0.00814828	0.00738583	0.007266972	0.004387811	0.001668748	0.00026274	0.000847326
17:20:46.081	0.00000001	0.00000001	0.000832715	0.001843554	0.00507001	0.005917152	0.00665786	0.008081447	0.010353518	0.01061935	0.010434333	0.008159923	0.00740658	0.007206876	0.004390409	0.001675194	0.000266829	0.0008568
17:20:46.146	0.00000001	0.000137393	0.000832511	0.001784753	0.005104901	0.005980003	0.006707471	0.008103379	0.01033169	0.01060417	0.01043936	0.008155929	0.007419822	0.007199675	0.004394956	0.00167435	0.000277956	0.000855366
17:20:46.212	0.00000001	0.000258027	0.000888087	0.00177476	0.005152424	0.00594208	0.006748814	0.008108681	0.010362874	0.010591868	0.010428741	0.00815198	0.00742598	0.007194644	0.004394765	0.001674535	0.000284052	0.00087111
17:20:46.276	1.04E-05	0.00000001	0.00084208	0.00170418	0.005192582	0.005897527	0.006763334	0.008081042	0.010372702	0.010553849	0.010441188	0.008163556	0.007423513	0.007216231	0.004400075	0.001684122	0.000289324	0.000866269
17:20:46.342	0.00000001	4.82E-05	0.000888392	0.001648324	0.005184882	0.005872069	0.006852673	0.008121537	0.010376419	0.010567451	0.010455867	0.008177434	0.007423766	0.007185406	0.004405462	0.00168784	0.000274536	0.000858074
17:20:46.407	0.00000001	0.000152725	0.000905085	0.001601211	0.005247083	0.005798875	0.006834926	0.008145669	0.010372765	0.010597253	0.010456458	0.008189758	0.007425452	0.007197983	0.004406675	0.001686645	0.0002619	0.000855058
17:20:46.473	0.00000001	0.000255606	0.000943967	0.001589255	0.005213155	0.005736554	0.006868202	0.008171794	0.01035837	0.010596696	0.010463932	0.00820192	0.007414508	0.007219341	0.004413762	0.001682506	0.000267987	0.000860991
17:20:46.539	0.00000001	0.000166756	0.000911701	0.001608974	0.005323963	0.005624908	0.006806289	0.008204452	0.010374655	0.010625849	0.010469632	0.008210315	0.00743568	0.007253897	0.004416838	0.001688334	0.000271622	0.000862381
17:20:46.604	0.00000001	0.000470155	0.000851444	0.001644041	0.005351515	0.005414608	0.006831901	0.008238552	0.010395823	0.010636154	0.01047068	0.008227239	0.007448285	0.007257601	0.004418177	0.001693009	0.000282003	0.000856642
17:20:46.670	0.00000001	0.000412057	0.000874447	0.001623875	0.005333468	0.005277503	0.00675446	0.008279116	0.010399854	0.010652262	0.01047025	0.00823024	0.007445206	0.007244612	0.004418445	0.001697025	0.000277005	0.000863943
17:20:46.736	0.00000001	0.000294248	0.000855515	0.001591932	0.00535368	0.005305613	0.006925274	0.008244465	0.010400453	0.01065332	0.010487456	0.008231504	0.007465492	0.007244932	0.004412227	0.001697283	0.000267944	0.000870643
17:20:46.802	0.00000001	0.000248254	0.000922998	0.00163374	0.005379427	0.00522579	0.00694022	0.00825629	0.010381616	0.010686697	0.010476353	0.008229225	0.007466125	0.007230439	0.004415999	0.001700732	0.000264867	0.000866954
17:20:46.868	0.00000001	0.000253544	0.0009516	0.001603581	0.005271266	0.005225259	0.006871249	0.008284891	0.010400926	0.010734464	0.010493155	0.008217062	0.007459419	0.007247133	0.004409762	0.001708651	0.000254725	0.000871713
17:20:46.933	0.00000001	4.25E-05	0.00091913	0.001641057	0.005337679	0.005188928	0.006879921	0.008295204	0.01038338	0.010750665	0.010516249	0.008204177	0.007445122	0.007257835	0.004408177	0.001709351	0.000271185	0.000873428
17:20:47.000	0.00000001	9.62E-05	0.000926968	0.001596621	0.005319271	0.005192375	0.007039039	0.008307304	0.010388767	0.010758278	0.010532326	0.008208735	0.007442001	0.007282029	0.004409266	0.00170722	0.00027716	0.000874421
17:20:47.064	0.00000001	0.000163977	0.000897654	0.001583326	0.00534201	0.005220221	0.007054366	0.008286335	0.010391927	0.010731493	0.010550823	0.00820684	0.007426502	0.0073129	0.004410278	0.00170862	0.000260752	0.000866992
17:20:47.130	0.00000001	0.00000001	0.000786503	0.001668182	0.005337438	0.005106983	0.007177989	0.008267016	0.010395266	0.010755261	0.010565528	0.008228097	0.00741889	0.0073288	0.004411778	0.001708749	0.000273876	0.000869617
17:20:47.195	0.00000001	0.00000001	0.00071281	0.001654351	0.005312533	0.005251249	0.007083608	0.008266596	0.010374823	0.010783996	0.010572922	0.008230173	0.007419607	0.007368133	0.004413296	0.001709532	0.000262271	0.000856107
17:20:47.261	0.00000001	0.000203112	0.000724617	0.00165917	0.005361982	0.005266365	0.007087036	0.008278146	0.010405503	0.010825821	0.01057483	0.008227217	0.007424415	0.007378195	0.004411195	0.001707998	0.000266926	0.000857717
17:20:47.327	0.00000001	0.000207147	0.000649906	0.001706996	0.005473151	0.005302166	0.00698842	0.008213863	0.010389848	0.010817048	0.010580423	0.008206908	0.007428996	0.007426628	0.004413354	0.001714341	0.00027423	0.000875022
17:20:47.392	0.00000001	0.00000001	0.00065866	0.001781323	0.005428876	0.005411426	0.007015443	0.008197981	0.010405157	0.010821829	0.010589232	0.008215029	0.007433382	0.007438382	0.004418244	0.001712374	0.000275636	0.000887264
17:20:47.457	0.00000001	0.00000001	0.000640441	0.001764379	0.005537638	0.005512995	0.007056987	0.008207332	0.010407141	0.010845086	0.010603158	0.008204017	0.007447131	0.007406779	0.004408731	0.00171882	0.000266952	0.000883525
17:20:47.523	0.00000001	0.00000001	0.000701105	0.001714769	0.005485543	0.005628355	0.007101557	0.008178937	0.010423962	0.010853535	0.010608616	0.0082102	0.00745449	0.007390655	0.004413048	0.001713322	0.000265966	0.000882345
17:20:47.588	0.00000001	0.00000001	0.000728587	0.001671582	0.005569641	0.00575114	0.007049728	0.008168074	0.010420875	0.010878927	0.010619827	0.008208846	0.007465266	0.007395091	0.004420162	0.001717749	0.000273784	0.000880221
17:20:47.654	0.00000001	0.00000001	0.000702361	0.0017435	0.005544857	0.005857218	0.007047711	0.008172474	0.010435113	0.0108929	0.01062558	0.008211938	0.007486395	0.007414025	0.004418481	0.001718233	0.000283771	0.000881197
17:20:47.719	0.00000001	0.00000001	0.000728011	0.001718695	0.005625506	0.005912379	0.006974303	0.008169656	0.01044072	0.010889743	0.01062265	0.008222679	0.00746904	0.007404467	0.004425654	0.001721498	0.000293664	0.000880204
17:20:47.785	0.00000001	0.00000001	0.000698697	0.001699778	0.005563665	0.005999362	0.007089031	0.008153682	0.010462801	0.010873867	0.010635984	0.008229087	0.007480174	0.007419742	0.004421661	0.001719819	0.000303565	0.000889733
17:20:47.851	0.00000001	0.00000001	0.000655947	0.00172387	0.005591217	0.00602376	0.007177564	0.008090431	0.010477889	0.010873063	0.01063757	0.008238633	0.007479774	0.007419768	0.00443255	0.001721117	0.000288666	0.000889513
17:20:47.916	0.00000001	3.44E-05	0.000627854	0.00173199	0.005568839	0.006168557	0.007165464	0.008101156	0.01051424	0.010884668	0.01063843	0.008242649	0.007494282	0.007434997	0.004434804	0.001722352	0.00027279	0.000884466
17:20:47.981	0.00000001	0.00000001	0.00061452	0.001730651	0.005527692	0.006055584	0.007029538	0.008110231	0.01050668	0.010892931	0.010631736	0.008252646	0.007507693	0.007396351	0.004438653	0.001725225	0.000279528	0.0008858
17:20:48.046	1.17E-05	0.00000001	0.000643936	0.001801141	0.005523962	0.006201441	0.0069162	0.008149764	0.010536384	0.010924358	0.010624558	0.008255399	0.007528674	0.007412953	0.004441528	0.001730508	0.000285674	0.00088617
17:20:48.112	2.19E-05	0.000164739	0.000781958	0.001755992	0.005563906	0.006189242	0.006830289	0.008211571	0.010554936	0.010909828	0.010624665	0.008271398	0.007538058	0.007391107	0.00443701	0.001733345	0.000278302	0.000881493
17:20:48.178	3.83E-05	8.45E-05	0.000823181	0.001741002	0.005620694	0.006170943	0.006841381	0.008246222	0.010573496	0.010890238	0.010638296	0.00828329	0.007536687	0.007367691	0.004437402	0.001732232	0.000275626	0.0008866
17:20:48.243	0.00000001	0.00000001	0.000790406	0.001799535	0.005541648	0.006279054	0.006878488	0.008200365	0.010559857	0.010883229	0.010655986	0.008276791	0.00754993	0.007377615	0.004443601	0.001736702	0.000267861	0.000891298
17:20:48.309	2.00E-05	0.00000001	0.000832036	0.001809707	0.005450572	0.006276137	0.006871833	0.008244641	0.010575859	0.010897991	0.01066311	0.008293873	0.00754828	0.007377478	0.004441777	0.001732428	0.000274016	0.000884466
17:20:48.374	0.000141399	0.00000001	0.000843335	0.00182443	0.005473191	0.00628648	0.006857313	0.008291117	0.01057945	0.010894741	0.010662662	0.008285171	0.007542945	0.007391244	0.00444042	0.001738926	0.000274916	0.000872802
17:20:48.440	0.000166447	0.00000001	0.00081972	0.001818888	0.005472348	0.006345353	0.006841582	0.008270835	0.01058953	0.010859043	0.010670996	0.008286886	0.007538496	0.007436842	0.004446992	0.001741716	0.000275568	0.000871975
17:20:48.506	0.000164199	0.00000001	0.000849645	0.001871354	0.005432044	0.006346149	0.006816172	0.008285961	0.010584301	0.010859507	0.010683631	0.008296747	0.007526434	0.007429469	0.004446772	0.001744569	0.000267724	0.000878742
17:20:48.571	0.000218951	0.00000001	0.000854022	0.001913737	0.005436495	0.006278789	0.006802459	0.008321643	0.010594066	0.010838571	0.010691804	0.008296973	0.007510576	0.007420322	0.004441251	0.001744456	0.000265967	0.00088081
17:20:48.636	0.000332149	0.00000001	0.000842486	0.00190294	0.005494486	0.006285684	0.006794593	0.008326662	0.010603264	0.010836436	0.01071557	0.008301982	0.007510492	0.007390502	0.004445807	0.001740769	0.000266233	0.000873216
17:20:48.701	0.000345797	0.00000001	0.000807064	0.001936579	0.005486024	0.006270303	0.006749621	0.008368532	0.010588491	0.010856908	0.010719898	0.008297943	0.007520677	0.007391005	0.004445779	0.001741511	0.000250511	0.000876944
17:20:48.766	0.000326047	0.00000001	0.000803196	0.001927032	0.005498537	0.006190479	0.006753453	0.008351367	0.010603862	0.010867585	0.010713581	0.008287563	0.007514056	0.007422929	0.004449182	0.001747658	0.000250219	0.000883462
17:20:48.831	0.000230993	0.00000001	0.000798718	0.001957726	0.005579146	0.006159186	0.006770595	0.008375842	0.010606508	0.010857991	0.010734443	0.008285487	0.007507561	0.007404472	0.004445362	0.001747037	0.00024793	0.000881692
17:20:48.896	0.0001518	0.00000001	0.000791084	0.001951837	0.00563461	0.005951009	0.006700212	0.008356385	0.010619927	0.010850703	0.010734389	0.008293994	0.007517872	0.007394365	0.004452143	0.001756047	0.000243395	0.000883358
17:20:48.962	0.000115351	0.00000001	0.000790575	0.001946127	0.005671546	0.006050191	0.006713522	0.008341466	0.010622447	0.010835477	0.010753208	0.008293904	0.007508847	0.007439322	0.00445817	0.001753514	0.00022121	0.000879454
17:20:49.028	0.00000001	0.00000001	0.000827829	0.001902583	0.005741688	0.006051783	0.006761923	0.008324828	0.010620022	0.010837334	0.010767134	0.00829835	0.007506422	0.007474355	0.004457797	0.001746615	0.000214343	0.000883982
17:20:49.093	7.91E-05	0.00000001	0.000801364	0.001930046	0.005722318	0.006122855	0.006874656	0.008277458	0.010630386	0.010857202	0.010770092	0.008280545	0.007515469	0.007521417	0.004462544	0.00174405	0.000225942	0.000890362
17:20:49.159	6.61E-05	0.00000001	0.000784264	0.001942716	0.005668418	0.00627322	0.006894218	0.008277664	0.010645467	0.010863562	0.010760198	0.00828657	0.007524297	0.007564565	0.004465543	0.001739437	0.000237275	0.000895187
17:20:49.224	0.000199327	0.00000001	0.000757291	0.00196654	0.005647483	0.006297176	0.006891193	0.008323522	0.010659358	0.010864676	0.01075509	0.008301577	0.007518098	0.007586015	0.004466145	0.001738593	0.000236856	0.000905219
17:20:49.290	0.000142166	0.00000001	0.000750573	0.001983493	0.005716182	0.006243341	0.006909746	0.008315547	0.010673281	0.010903391	0.010768506	0.00829774	0.007519216	0.007592235	0.004466374	0.001743917	0.000237301	0.00089965
17:20:49.356	0.000100741	0.00000001	0.000808795	0.001965826	0.005779466	0.006234059	0.006947055	0.008295227	0.010681912	0.010939599	0.010801574	0.008303306	0.007522589	0.007546591	0.004463824	0.001736327	0.000231163	0.000900146
17:20:49.421	2.19E-05	8.02E-05	0.000807585	0.001906222	0.005812191	0.006020578	0.006824239	0.008292683	0.010691708	0.010983096	0.010809908	0.008318132	0.007533133	0.007556196	0.004470214	0.001724351	0.000236015	0.000901447
17:20:49.486	2.43E-05	0.00013309	0.000710074	0.001898638	0.005875957	0.00600334	0.006868807	0.008342597	0.010699961	0.011023993	0.010826576	0.008314499	0.007537434	0.007562334	0.004476499	0.001723054	0.000242548	0.000893506
17:20:49.550	0.00000001	0.000202888	0.000762392	0.0018128	0.005873912	0.005980268	0.006921847	0.008292614	0.010709663	0.011055606	0.010816253	0.008320546	0.007544752	0.007552272	0.004480778	0.001719017	0.000217156	0.000889128
17:20:49.616	0.00000001	5.08E-05	0.000774402	0.001828861	0.005898094	0.006087937	0.00684622	0.008299627	0.010704118	0.011062662	0.010806306	0.008326007	0.007550487	0.007594623	0.004475907	0.001719347	0.000211995	0.000902644
17:20:49.681	0.00000001	0.000252513	0.000849011	0.001855719	0.005870302	0.005974169	0.006836944	0.008298939	0.010749288	0.011065958	0.010811333	0.00832612	0.007554726	0.007624854	0.004478132	0.00172464	0.000214961	0.000894863
17:20:49.746	0.00000001	0.000332801	0.000890336	0.001853042	0.005941527	0.005881616	0.006703237	0.008353047	0.010752533	0.011061455	0.010822571	0.008350987	0.007563772	0.007620326	0.004480746	0.001720479	0.000212621	0.000889983
17:20:49.812	0.00000001	0.000486921	0.000906826	0.001850098	0.005978704	0.006017366	0.006670768	0.008378347	0.010744689	0.011068929	0.01081956	0.008367235	0.007580663	0.007636019	0.004482838	0.001721163	0.000218725	0.000897576
17:20:49.878	7.33E-06	0.000262196	0.000939295	0.001847599	0.005914096	0.006038582	0.006759704	0.008418017	0.01073735	0.011092651	0.010809371	0.008368205	0.007569866	0.007662636	0.004483039	0.001718063	0.000214224	0.000903482
17:20:49.943	0.00000001	0.000150439	0.000921075	0.001903813	0.005953679	0.006016571	0.006734899	0.008466762	0.010766109	0.011107975	0.010807086	0.008382895	0.007595023	0.007647452	0.004484615	0.001722903	0.000224211	0.000908644
17:20:50.009	7.94E-05	0.00000001	0.000859291	0.001939772	0.005890635	0.005741299	0.006785921	0.008499144	0.010766455	0.011113963	0.010804693	0.00837344	0.007591818	0.007617313	0.004489877	0.00172559	0.000226328	0.000908236
17:20:50.075	0.00000001	0.000116549	0.000912526	0.001943271	0.005848044	0.005734138	0.006713925	0.008502925	0.0107777	0.011114427	0.010809936	0.008380007	0.007592302	0.007589918	0.004492084	0.001726466	0.000202505	0.000898409
17:20:50.140	0.00000001	0.000177067	0.000904383	0.001934527	0.005808221	0.005661475	0.006802055	0.008493025	0.01078104	0.011122923	0.01083768	0.00837845	0.00759018	0.007546906	0.004486296	0.00172798	0.000205334	0.000890821
17:20:50.206	0.00000001	8.87E-05	0.000972071	0.00188911	0.005974092	0.005585895	0.006903696	0.008498113	0.010769605	0.011128493	0.010842137	0.008371138	0.007604708	0.007557654	0.00448684	0.001726435	0.000217961	0.000882851
17:20:50.272	0.00000001	0.00000001	0.000947947	0.001892858	0.00597349	0.00566731	0.006951694	0.008523826	0.010779811	0.011097298	0.010851036	0.008388086	0.007618942	0.007561587	0.004488922	0.001726054	0.000219392	0.000878269
17:20:50.336	0.00000001	0.00000001	0.000951205	0.00187528	0.005899017	0.005598889	0.006862578	0.008544146	0.010791315	0.011080633	0.010839583	0.008396074	0.007631616	0.007573158	0.004497442	0.001734189	0.000221561	0.000869765
17:20:50.402	0.00000001	0.00000001	0.000915466	0.001907134	0.005839943	0.005789299	0.006953733	0.008590966	0.010800262	0.011061925	0.010848159	0.008386213	0.007639924	0.007567441	0.004493364	0.001749141	0.000207159	0.000873306
17:20:50.467	0.00000001	0.00000001	0.000994045	0.001908383	0.005781351	0.005805741	0.006943851	0.008526408	0.010790717	0.011024974	0.010831168	0.008389176	0.007648317	0.007560693	0.004490346	0.001750892	0.000209405	0.000892491
17:20:50.533	0.00000001	0.00000001	0.001038321	0.001916235	0.005763665	0.005925609	0.00695696	0.008567384	0.010812137	0.01100673	0.010864962	0.008378322	0.007651628	0.007591884	0.004493058	0.001751829	0.000231685	0.00090823
17:20:50.598	0.00000001	0.00000001	0.001006056	0.001881704	0.005754401	0.005706823	0.007138261	0.008573778	0.01082839	0.011003388	0.010884802	0.008393983	0.007647642	0.007571029	0.004503765	0.001757225	0.000231094	0.000913557
17:20:50.664	0.00000001	0.00000001	0.00094417	0.001846994	0.005694486	0.005777896	0.007142698	0.008570203	0.010830973	0.011001299	0.010892598	0.008405108	0.007661813	0.007586167	0.00450452	0.001759154	0.0002349	0.000919077
17:20:50.730	0.00000001	0.00000001	0.000949869	0.001860676	0.00568847	0.006053698	0.007217517	0.008596535	0.01082754	0.011031426	0.010923273	0.008402581	0.007657827	0.007612282	0.004509907	0.001767845	0.000224939	0.000915349
17:20:50.795	0.00000001	0.00000001	0.000918011	0.001895297	0.005608342	0.005972047	0.007318554	0.008568278	0.010840927	0.011039828	0.010943786	0.008406439	0.007661412	0.007636837	0.004510336	0.001766249	0.000230374	0.000914544
17:20:50.861	0.00000001	0.00000001	0.000937961	0.001895297	0.005621215	0.006005727	0.007380265	0.008569996	0.010860268	0.011039503	0.010960455	0.008407274	0.007663205	0.007629336	0.004507175	0.001762171	0.000234	0.000911301
17:20:50.926	0.00000001	0.00000001	0.000980915	0.001854519	0.005587047	0.006095363	0.007386718	0.008538661	0.010851196	0.011045719	0.010968762	0.008406394	0.007645366	0.00763862	0.004507843	0.001761162	0.000233965	0.000908147
17:20:50.992	0.00000001	0.00000001	0.000971245	0.001808121	0.005564789	0.006226369	0.007440161	0.008501329	0.010870505	0.011033649	0.010986989	0.008433541	0.00765574	0.007667067	0.004514108	0.001755488	0.000237223	0.000913099
17:20:51.056	0.00000001	0.00000001	0.000860807	0.001780996	0.005635773	0.006329264	0.007479083	0.00849356	0.010860425	0.011053007	0.010992769	0.008435256	0.007665035	0.007689295	0.004516773	0.001754777	0.000239469	0.000911059
17:20:51.121	0.00000001	0.00000001	0.000909868	0.001796432	0.005728655	0.006194545	0.007460328	0.008540999	0.010859197	0.01106995	0.010976316	0.008442703	0.007663938	0.007724923	0.004520393	0.001759833	0.000219847	0.000916138
17:20:51.186	0.00000001	0.00000001	0.000802891	0.001805355	0.005585162	0.006290811	0.007419187	0.00854038	0.010875986	0.011083413	0.01097979	0.008465179	0.007673153	0.007722595	0.004532504	0.001762037	0.000215877	0.000912669
17:20:51.251	0.00000001	0.00000001	0.000884308	0.001745572	0.005526088	0.006394502	0.007440968	0.008549318	0.010907391	0.01110212	0.010974844	0.008461951	0.007685068	0.007738877	0.004536735	0.001757722	0.000209036	0.000915906
17:20:51.316	0.00000001	0.00000001	0.000890212	0.001786082	0.005529577	0.006539564	0.007587559	0.008551586	0.010904895	0.011111405	0.010983796	0.00846563	0.007684772	0.007768285	0.004531071	0.001755343	0.000207947	0.000922683
17:20:51.381	0.00000001	0.00000001	0.000994644	0.001845864	0.005616924	0.006655159	0.007583526	0.008562862	0.010920992	0.01114947	0.010993125	0.008494672	0.007677392	0.007782234	0.00453472	0.001756775	0.000206052	0.000923808
17:20:51.447	0.00000001	0.000101217	0.000975203	0.001796075	0.005697413	0.006679291	0.007715216	0.008631614	0.010954696	0.011161261	0.011008852	0.008496853	0.007686923	0.007815509	0.004534223	0.001755632	0.000203155	0.000916396
17:20:51.512	0.00000001	0.000385653	0.000931843	0.001860587	0.005678765	0.006571357	0.007756155	0.008613395	0.010957657	0.011193524	0.011015116	0.00850949	0.007693882	0.007789531	0.00453173	0.00175695	0.000177583	0.00089838
17:20:51.578	0.00000001	7.46E-05	0.000962583	0.001862104	0.005638099	0.006754872	0.007795077	0.008606176	0.010979549	0.011212046	0.011006057	0.008506106	0.007699786	0.007780384	0.004531587	0.001756219	0.000180824	0.000881428
17:20:51.644	0.00000001	0.00000001	0.00102518	0.00186594	0.005584199	0.006747977	0.007672865	0.008562793	0.010958225	0.011217385	0.011020305	0.008508249	0.00770917	0.007773112	0.00453897	0.001753857	0.000194137	0.000879085
17:20:51.710	0.00000001	0.00000001	0.001021923	0.001848244	0.005574213	0.006620418	0.007592601	0.00854533	0.010977565	0.011192735	0.011017859	0.008515944	0.007728043	0.00770858	0.004537261	0.001744455	0.000203892	0.000886755
17:20:51.775	0.00000001	0.00000001	0.001090425	0.001811749	0.005579507	0.006604507	0.007392746	0.008568706	0.010980022	0.011191064	0.011012589	0.008498839	0.007729983	0.0076955	0.00454452	0.001747328	0.000204921	0.000889137
17:20:51.841	0.00000001	0.00000001	0.001093377	0.001800953	0.005635091	0.006852729	0.0071336	0.008547462	0.010989535	0.011169664	0.011021461	0.008502225	0.007730636	0.007681032	0.004551702	0.001750757	0.000222597	0.000898467
17:20:51.906	0.00000001	0.00000001	0.00105653	0.001824241	0.005698376	0.006913193	0.007315507	0.008604579	0.011010262	0.011202808	0.011032242	0.008516125	0.007753874	0.007702665	0.004548742	0.001752755	0.000232319	0.000897182
17:20:51.972	0.00000001	0.00000001	0.001105591	0.001798544	0.005732424	0.007082653	0.007333455	0.008628367	0.011024153	0.011213062	0.011017025	0.00851019	0.007739936	0.007699829	0.004550509	0.001750315	0.000233605	0.000888232
17:20:52.038	0.00000001	0.00000001	0.001174602	0.001801399	0.005745538	0.007176002	0.007315103	0.008667074	0.011042139	0.011229959	0.011024418	0.008517772	0.007741185	0.007709022	0.00455859	0.001752899	0.000256716	0.000902206
17:20:52.103	0.00000001	0.00000001	0.001215113	0.001844585	0.005710166	0.007255295	0.007308762	0.008671337	0.01105877	0.011232745	0.011044877	0.008513958	0.00776166	0.007681306	0.004565266	0.001750644	0.00027639	0.00090005
17:20:52.168	0.00000001	0.00000001	0.001333184	0.001865375	0.005808342	0.007205173	0.007341231	0.00868935	0.011085765	0.011247507	0.011052378	0.008516485	0.007756515	0.007657428	0.004556899	0.001754578	0.000256518	0.000901125
17:20:52.234	0.00000001	0.00000001	0.001294109	0.001969326	0.005843593	0.007253703	0.007331349	0.00870585	0.011071213	0.011252799	0.011065444	0.00852655	0.007753099	0.007633097	0.004558943	0.001754012	0.000253219	0.000907131
17:20:52.299	0.00000001	0.00000001	0.001258789	0.001934081	0.005828795	0.007254764	0.007276494	0.008686806	0.011091971	0.011268443	0.011076709	0.00851899	0.007768197	0.007633279	0.004566517	0.001760526	0.000259092	0.000907224
17:20:52.365	0.00000001	0.00000001	0.001181534	0.001905845	0.005703669	0.007148716	0.007487844	0.00866563	0.011094669	0.011254934	0.011066734	0.008507165	0.007767585	0.007608354	0.00457348	0.001755141	0.000270099	0.000898451
17:20:52.430	0.00000001	0.00000001	0.001181025	0.001952958	0.005651694	0.007111854	0.007445695	0.008605885	0.011084747	0.011255862	0.011060229	0.00853092	0.007747236	0.007597698	0.004576756	0.001756418	0.000262332	0.000891006
17:20:52.496	0.00000001	0.00000001	0.001140514	0.001925922	0.005677682	0.007190882	0.007347885	0.008661413	0.011093692	0.011238129	0.011048534	0.008547054	0.007751538	0.007625373	0.004583509	0.001754822	0.000292773	0.000904456
17:20:52.561	3.91E-05	0.00000001	0.001148962	0.001951887	0.005697774	0.00706624	0.007219623	0.008662101	0.011102985	0.011243653	0.011058185	0.008558292	0.007751011	0.007633696	0.004582478	0.001756469	0.000296631	0.000913544
17:20:52.626	0.000104951	0.00000001	0.0011112	0.001972231	0.00583084	0.007103633	0.007240193	0.008748453	0.01111908	0.01125953	0.011083242	0.008565468	0.007747215	0.007619335	0.004582124	0.001755295	0.000285401	0.000917779
17:20:52.691	0.000152638	2.38E-05	0.001074761	0.001990433	0.00589641	0.006968118	0.007374505	0.008765297	0.01113442	0.011298802	0.011081279	0.008567025	0.007742977	0.00765853	0.004587827	0.001756284	0.00028018	0.000909265
17:20:52.756	0.000181861	0.000181594	0.001064175	0.002002657	0.005925646	0.007138904	0.007523136	0.008793348	0.011161038	0.011298059	0.011072407	0.008584062	0.007748354	0.007681352	0.004587406	0.001757376	0.000285375	0.000904568
17:20:52.821	0.000273062	0.000207012	0.001019695	0.002016309	0.005866211	0.006799985	0.007600779	0.008817342	0.011159557	0.011344155	0.011070391	0.008590154	0.007757293	0.007678303	0.004592125	0.001755872	0.000291573	0.000896924
17:20:52.887	0.000320268	0.000416002	0.001001068	0.002027641	0.005852255	0.006657841	0.00747534	0.00880483	0.011150422	0.011359242	0.011078563	0.008578781	0.007749448	0.007658866	0.004593089	0.001758941	0.0002779	0.000894465
17:20:52.952	0.000301321	0.00056416	0.000985585	0.002042899	0.005871024	0.006646054	0.007409999	0.008804211	0.011149981	0.011386543	0.011099695	0.008587762	0.007766297	0.007640389	0.004590883	0.001765366	0.00028174	0.000903613
17:20:53.017	0.000290242	0.000533497	0.000953929	0.002031746	0.00581941	0.006360439	0.007484415	0.008793279	0.011172315	0.01137322	0.01110138	0.008592817	0.007763134	0.007635541	0.004584837	0.001765068	0.00025874	0.0009024
17:20:53.083	0.000255079	0.000886521	0.000966144	0.001966342	0.005860436	0.006393854	0.0074839	0.008808611	0.011190805	0.011403255	0.011106622	0.008602994	0.007765791	0.007642539	0.004588189	0.001768579	0.000256503	0.000912154
17:20:53.149	0.000177686	0.000769922	0.00090609	0.001954564	0.005791016	0.006387224	0.007467161	0.008819267	0.011203562	0.011395874	0.01112571	0.008605048	0.00776345	0.007664059	0.004592525	0.001770608	0.000285084	0.000919008
17:20:53.214	0.000196312	0.000611768	0.000909551	0.001891837	0.005827711	0.006100284	0.007449213	0.008792248	0.011219721	0.011398473	0.011130737	0.008604845	0.007766929	0.007697034	0.004595572	0.001769753	0.000306221	0.00092422
17:20:53.280	0.000364101	0.000740336	0.000943751	0.001953225	0.005953318	0.006002693	0.00750326	0.008831161	0.011221517	0.011414071	0.011141733	0.008616782	0.007771316	0.007694931	0.004595562	0.001756874	0.000304927	0.000939456
17:20:53.345	0.000348045	0.000812958	0.000989249	0.001956388	0.006012511	0.006029743	0.007306834	0.008862375	0.011236143	0.011415974	0.011155954	0.008629622	0.007792044	0.007700007	0.004593576	0.001761251	0.000296303	0.000942412
17:20:53.411	0.000431699	0.000729039	0.000945074	0.001952283	0.006060516	0.006039024	0.007342731	0.008893313	0.01124405	0.011450976	0.011182516	0.008626651	0.007809441	0.007712447	0.004598466	0.001761652	0.000290465	0.00094223
17:20:53.477	0.000404884	0.000852093	0.000950062	0.00198039	0.00604656	0.006049897	0.007356647	0.008883642	0.011242191	0.011468106	0.011187812	0.008618437	0.007824202	0.007715826	0.004602869	0.00176572	0.000283813	0.00093896
17:20:53.541	0.000297307	0.000821834	0.000923598	0.001983156	0.006078322	0.006040881	0.007389922	0.008898217	0.011239104	0.011469962	0.011194211	0.008607628	0.007841599	0.007707091	0.004608839	0.001764556	0.000298832	0.000942054
17:20:53.608	0.000312079	0.000848462	0.000872094	0.001979587	0.00607748	0.006165522	0.00758655	0.008862673	0.011264997	0.011521026	0.011182651	0.008611058	0.00784938	0.007739929	0.004612583	0.001772259	0.000302381	0.000936043
17:20:53.674	0.000327011	0.000954974	0.000938153	0.001998236	0.006046199	0.006185412	0.007607322	0.008879861	0.011265375	0.011515316	0.011195233	0.008607696	0.007842063	0.007734258	0.004611799	0.001779436	0.00032893	0.000939114
17:20:53.739	0.000267602	0.001140968	0.000928586	0.001996183	0.006124522	0.006232882	0.007368545	0.008860129	0.011266541	0.011545954	0.011208137	0.008605462	0.007838035	0.007719302	0.004612506	0.001781022	0.000319423	0.000938199
17:20:53.803	0.00012891	0.001291054	0.000961666	0.001939524	0.006297051	0.006362562	0.007427299	0.008888042	0.011286669	0.011532538	0.011225827	0.008623605	0.007839577	0.007722915	0.004612258	0.001783288	0.000310336	0.000923475
[truncated: 1,080 more rows]
