# Supplementary material for: Measurements of spectral irradiance during the solar eclipse of 21 August 2017: reassessment of the effect of solar limb darkening and of changes in total ozone
Source: Copernicus journal article supplement (doi:10.5194/acp-2018-1048), 2018-11-02
Supplement: Supplementary file 1 [file acp-2018-1048-supplement.zip › Readme.pdf]

## Contents of zip file

This zip file contains:

- The pdf file “**Calibration\_of\_GUVis-3511.pdf**”, which includes a detailed description of the method used to calibrate solar measurements performed with the GUVis-3511 radiometer during the solar eclipse of 21 August 2017.
- 13 comma-separated text files with calibrated solar data and other data shown in Figs. 11 and 14 of the paper, specifically:
  - **Fig11a\_Measurement.csv**: Measurements of global spectral irradiance shown in Fig. 11a. Units are  $\mu\text{W cm}^{-2} \text{ nm}^{-1}$ .
  - **Fig11a\_Model.csv**: Radiative transfer model calculations shown in Fig. 11a. Units are  $\mu\text{W cm}^{-2} \text{ nm}^{-1}$ .
  - **Fig11b\_Measurement\_to\_Model.csv**: Ratio of measured and modeled global spectral irradiance shown in Fig. 11b.
  - **Fig11b\_Connecting\_lines.csv**: Lines connecting ratios of measurement and model at the times of the 1<sup>st</sup> and 4<sup>th</sup> contact shown in Fig. 11b.
  - **Fig11c\_Measurement\_model\_corrected.csv**: Ratio of measurement and model, corrected for the bias between measurement and model shown in Fig. 11c.
  - **Fig11c\_Theory\_Pierce.csv**: Theoretical solar limb darkening effect calculated with the parameterizations by Pierce shown in Fig. 11c.
  - **Fig11c\_Theory\_Neckel.csv**: Theoretical solar limb darkening effect calculated with the parameterizations by Neckel.
  - **Fig11c\_Theory\_Waldmeier.csv**: Theoretical limb darkening effect calculated with the parameterizations by Waldmeier.
  - **Fig11d\_Meas\_to\_Pierce.csv**: Ratio of the measured and theoretical solar limb darkening effect using the parameterization by Pierce shown in Fig. 11d.
  - **Fig11d\_Meas\_to\_Neckel.csv**: Ratio of the measured and theoretical solar limb darkening effect using the parameterization by Neckel.
  - **Fig11d\_Meas\_to\_Waldmeier.csv**: Ratio of the measured and theoretical solar limb darkening effect using the parameterization by Waldmeier.
- **Fig14\_Global.csv**: Measurements of global spectral irradiance shown in Fig. 14. Units are  $\mu\text{W cm}^{-2} \text{ nm}^{-1}$ .
- **Fig14\_Shadowbanding.csv**: Measurements of spectral irradiance during shadowbanding shown in Fig. 14. Units are  $\mu\text{W cm}^{-2} \text{ nm}^{-1}$ .
